# Supplementary material for: Super-promoters: Cooperativity between juxtaposed promoters
Source: Research Square preprint supplement (doi:10.21203/rs.3.rs-2803901/v1), 2023-05-25
Supplement: Supplementary file 1 [file 234572e09dc3a7fb940c4663.xlsx]

## Sheet: SuperPromoters_core_MCF7
chr	super-Promoter_start	super-Promoter_end	sub-promoter#1_start	sub-promoter#1_end	sub-promoter#2_start	sub-promoter#2_end	peak#1_start	peak#1_end	CTSS#1	peak#1_l2fc	peak#1_pval	peak#1_adj_pval	peak#1_readcount	peak#2_start	peak#2_end	CTSS#2	peak#2_l2fc	peak#2_pval	peak#2_adj_pval	peak#2_readcount	peak#3_start	peak#3_end	CTSS#3	peak#3_2fc	peak#3_pval	peak#3_adj_pval	peak#3_readcount	peak#4_start	peak#4_end	CTSS#4	peak#4_l2fc	peak#4_pval	peak#4_adj_pval	peak#4_readcount	host_gene	orientation	hgnc	host_gene_baseMean	host_gene_lfc
chr1	958135	959393	959255	959393	958135	958243	959354	959441	47	0.47712	0.0654683	0.155374	269	959204	959291	2302	-0.105892	0.231919	0.403166	13012	958237	958283	4	0.363978	0.742629	0.855146	14	958088	958136	7	-0.301533	0.737589	0.851994	21	ENSG00000188976	-	NOC2L	6632.31	-0.145713
chr1	998982	1000295	1000094	1000295	998982	999161	1000280	1000372	71	1.53322	8.23558e-10	8.93714e-09	388	999957	1000128	10391	0.934158	4.23988e-19	8.99881e-18	31072	998936	999286	267	2.49814	1.51895e-53	1.12736e-51	959	998960	999012	6	0.821187	0.340891	0.526708	23	ENSG00000188290	-	HES4	4178.77	0.808809
chr1	1272509	1274035	1273832	1274035	1272509	1272771	1274016	1274113	81	-0.617712	0.0406628	0.106065	208	1273774	1273862	4114	0.307655	0.000135898	0.000704713	17907	1272710	1272911	142	1.14527	4.68531e-09	4.70792e-08	559	1272458	1272535	168	-0.691975	0.000781151	0.00344245	496	ENSG00000160087	-	UBE2J2	2723.39	0.190123
chr1	1307553	1308009	1307929	1308009	1307553	1307793	1307999	1308049	9	0.412389	0.498212	0.675112	44	1307852	1308134	943	0.580525	4.67439e-09	4.6975e-08	4778	1307781	1307832	5	1.60244	0.0642747	0.153169	23	1307503	1307577	10	-0.00832336	0.983447	0.991209	110	ENSG00000131584	-	ACAP3	7058.41	0.644621
chr1	1406441	1407372	1407246	1407372	1406441	1406568	1407354	1407443	137	0.645586	0.0040318	0.0148509	486	1407166	1407265	6977	-0.201859	0.0217433	0.0631164	22532	1406418	1406639	112	-1.47899	2.71985e-21	6.45495e-20	1185	1406396	1406449	3	-2.30634	0.0393235	0.103241	22	ENSG00000242485	-	MRPL20	2664.78	-0.38837
chr1	1471661	1472157	1471661	1471777	1472128	1472157	1471483	1471691	21	-0.376482	0.192755	0.353426	237	1471751	1471817	512	-0.27497	0.013406	0.0420096	2884	1472107	1472132	5	1.73991	0.12904	0.262507	14	1472150	1472205	3	-0.317389	0.772959	0.874807	16	ENSG00000160072	+	ATAD3B	2113.99	-0.265828
chr1	1574625	1574946	1574862	1574946	1574625	1574762	1574941	1575049	29	1.17942	0.000457684	0.0021295	151	1574789	1574891	7276	0.363949	4.68053e-06	3.16235e-05	30381	1574742	1574813	12	2.72778	0.000114555	0.000603817	47	1574549	1574648	1272	0.205632	0.0416254	0.108142	10394	ENSG00000160075	-	SSU72	4443.49	0.15959
chr1	1599740	1600187	1600134	1600187	1599740	1599825	1600182	1600308	5	-2.55618	0.00200382	0.00801527	44	1599971	1600172	311	-1.27426	7.73197e-19	1.6147e-17	2124	1599800	1599876	7	1.52864	0.00378724	0.0140543	60	1599682	1599765	96	-1.27273	4.55993e-07	3.58384e-06	333	ENSG00000228594	-	FNDC10	1782.08	-1.45437
chr1	1615796	1616262	1615796	1615864	1616170	1616262	1615723	1615808	69	0.468715	0.0243387	0.069449	420	1615841	1615935	330	2.14109	7.12578e-56	5.54172e-54	1371	1616078	1616176	167	1.77272	1.44083e-14	2.30904e-13	375	1616254	1616328	40	-0.00281135	0.99249	0.996261	190	ENSG00000197530	+	MIB2	3119.14	1.46043
chr1	2546063	2547017	2546063	2546399	2546966	2547017	2546017	2546067	11	1.30203	0.0223943	0.0647067	52	2546391	2546450	968	1.59748	1.17854e-32	4.66648e-31	1311	2546910	2546991	42	1.37652	3.68294e-06	2.5302e-05	195	2547013	2547153	65	1.00082	0.0130791	0.0411422	120	ENSG00000272449	+	ENSG00000272449	562.894	1.29385
chr1	9182102	9182417	9182296	9182417	9182102	9182213	9182398	9182498	310	2.39463	8.7285e-78	1.16568e-75	1770	9182226	9182399	793	2.33345	2.27913e-88	3.62841e-86	3801	9182203	9182301	460	5.15814	1.69295e-211	1.96049e-208	3179	9182050	9182116	709	5.31789	2.5331e-84	3.75024e-82	1055	ENSG00000228526	-	MIR34AHG	2293.14	3.32189
chr1	12618001	12618438	12618208	12618438	12618001	12618085	12618415	12618570	150	4.40711	1.71292e-71	1.97549e-69	818	12618068	12618338	418	2.51986	2.04563e-79	2.76687e-77	2263	12618080	12618137	7	2.18647	0.00302518	0.011542	35	12617925	12618006	24	1.63189	9.24811e-06	5.94433e-05	140	ENSG00000162496	-	DHRS3	1400.63	2.61855
chr1	16155050	16156174	16156068	16156174	16155050	16155214	16156172	16156224	17	3.30728	0.000237858	0.00117047	34	16155993	16156081	1964	1.55105	1.89948e-66	1.92536e-64	4534	16155124	16155278	149	2.46253	4.51924e-42	2.43492e-40	711	16155002	16155155	22	1.75509	1.32338e-05	8.29884e-05	110	ENSG00000142627	-	EPHA2	4487.22	1.62511
chr1	20485828	20486368	20486209	20486368	20485828	20485924	20486363	20486415	5	-1.59814	0.127632	0.260389	20	20486162	20486230	129	-1.10513	9.24316e-08	7.92796e-07	543	20485919	20485977	4	-0.900129	0.355786	0.541504	20	20485754	20485836	99	-0.432652	0.116411	0.243274	243	ENSG00000162545	-	CAMK2N1	1884.19	-0.1418
chr1	23558344	23559643	23559498	23559643	23558344	23558369	23559642	23559695	127	2.00492	4.269e-15	7.0845e-14	298	23559448	23559508	22902	2.15889	3.65463e-160	1.95536e-157	59619	23558366	23558420	17	1.09659	0.078604	0.179635	44	23558298	23558362	10	2.2039	0.000189017	0.000950437	58	ENSG00000117318	-	ID3	6039.91	2.15006
chr1	26472274	26473233	26472274	26472514	26472878	26473233	26472257	26472308	5	-3.52361	0.00212632	0.00844335	33	26472433	26472566	19512	-1.15695	3.16457e-35	1.37472e-33	38313	26472827	26472883	3	-0.6159	0.474404	0.653823	24	26473210	26473287	13	0.809688	0.0522573	0.130148	95	ENSG00000198830	+	HMGN2	9075.07	-1.29487
chr1	26695934	26696756	26695934	26696031	26696706	26696756	26695867	26695961	25	-0.851746	0.00855481	0.0285293	185	26696013	26696442	1414	0.137064	0.146562	0.289089	5389	26696660	26696723	4	1.85554	0.0265237	0.0745762	26	26696739	26696822	17	1.37053	0.0020081	0.00802934	93	ENSG00000117713	+	ARID1A	5140.66	0.333444
chr1	26900061	26900525	26900452	26900525	26900061	26900197	26900510	26900593	54	-0.248658	0.380068	0.566476	244	26900404	26900470	72	0.710961	0.000340067	0.00162152	459	26900160	26900257	40	0.972398	0.000306287	0.00147551	233	26900014	26900096	22	-0.770873	0.035896	0.0957588	146	ENSG00000198746	-	GPATCH3	557.352	0.63429
chr1	28235965	28236545	28235965	28236153	28236482	28236545	28235920	28235968	6	-0.680613	0.512124	0.687189	16	28236118	28236206	44915	0.272641	0.00151237	0.00624053	170902	28236384	28236515	6	-0.68465	0.261069	0.438893	49	28236543	28236593	11	-0.154528	0.862878	0.927737	23	ENSG00000130770	+	ATP5IF1	4415.94	-0.025165
chr1	28736673	28737751	28736673	28736950	28737666	28737751	28736640	28736693	6	-2.41555	0.00346231	0.0129855	40	28736788	28737103	1602	0.144672	0.1133	0.238258	8889	28737602	28737696	30	0.637664	0.0594294	0.144068	151	28737743	28737800	3	0.403398	0.713461	0.836718	14	ENSG00000198492	+	YTHDF2	3419.65	0.205816
chr1	37807630	37808295	37807630	37807793	37808177	37808295	37807584	37807658	9	-0.159279	0.781601	0.880146	50	37807774	37807870	1927	-0.212585	0.00919634	0.0303846	12086	37808113	37808217	1185	-0.330413	0.000489565	0.0022635	6049	37808215	37808316	454	0.443611	0.000298322	0.00144059	1824	ENSG00000197982	+	C1orf122	2091.08	-0.146173
chr1	39026245	39026842	39026245	39026349	39026771	39026842	39026196	39026249	6	-0.538781	0.421311	0.606496	38	39026322	39026402	46061	0.0894008	0.269515	0.448516	101702	39026720	39026777	3	-0.0462233	0.968277	0.983955	12	39026830	39026911	60	3.44733	2.21121e-20	5.01953e-19	219	ENSG00000168653	+	NDUFS5	3713.29	0.10445
chr1	43452250	43453916	43453908	43453916	43452250	43452494	43453905	43453967	7	0.483672	0.369364	0.555558	56	43453751	43454005	190	-0.597458	1.22059e-08	1.1642e-07	2377	43452494	43452542	10	0.995014	0.24029	0.413314	22	43452202	43452251	9	-0.402946	0.70742	0.83255	17	ENSG00000178922	-	HYI	678.785	-0.604307
chr1	45583932	45584782	45583932	45584044	45584668	45584782	45583883	45583938	20	0.494063	0.465116	0.645135	35	45584038	45584097	5745	-1.67714	1.18336e-68	1.26468e-66	8851	45584533	45584684	28	-1.88886	3.10564e-08	2.82573e-07	211	45584782	45584835	8	-0.122681	0.88515	0.940243	25	ENSG00000132780	+	NASP	3252.03	-1.90271
chr1	51329583	51330531	51330200	51330531	51329583	51329733	51330526	51330580	10	0.858395	0.1909	0.350879	45	51330119	51330331	61	-0.609317	0.000340473	0.00162327	759	51329641	51329821	56	1.55969	1.41541e-28	4.73874e-27	1139	51329458	51329607	18	0.636979	0.023813	0.0681883	217	ENSG00000085831	-	TTC39A	3546.93	-0.0548902
chr1	51330200	51330637	51330561	51330637	51330200	51330531	51330632	51330705	11	-0.0465589	0.932508	0.965206	56	51330484	51330829	1029	0.259014	0.00676335	0.0233119	4726	51330526	51330580	10	0.858395	0.1909	0.350879	45	51330119	51330331	61	-0.609317	0.000340473	0.00162327	759	ENSG00000085831	-	TTC39A	3546.93	-0.0548902
chr1	53946313	53946637	53946313	53946355	53946550	53946637	53946233	53946320	118	-0.552697	0.000456041	0.00212306	951	53946330	53946422	586	-0.608395	1.74311e-08	1.63221e-07	3605	53946501	53946551	21	0.689337	0.184144	0.341737	66	53946635	53946692	5	-1.63862	0.0761532	0.175218	25	ENSG00000116212	+	LRRC42	695.14	-0.704246
chr1	66924855	66925332	66924855	66924989	66925205	66925332	66924759	66924962	77	-0.708491	0.000649128	0.0029184	499	66924955	66925060	410	-0.34111	0.00651773	0.0225692	1500	66925130	66925231	31	-0.534398	0.0970576	0.211727	179	66925303	66925382	27	0.791711	0.147427	0.290375	62	ENSG00000198160	+	MIER1	943.152	-0.306699
chr1	85464602	85465326	85465158	85465326	85464602	85464767	85465280	85465341	2	-1.169	0.193086	0.353879	24	85465110	85465172	2203	-0.263402	0.0134786	0.0422042	4924	85464746	85464844	19	-2.15579	6.10837e-08	5.3555e-07	170	85464539	85464605	4	-0.34294	0.579975	0.740502	45	ENSG00000153904	-	DDAH1	1246.64	-0.276677
chr1	89820905	89821938	89820905	89821031	89821904	89821938	89820860	89820915	4	0.603479	0.532085	0.703367	17	89821006	89821097	245	-0.658657	2.42536e-06	1.71459e-05	1313	89821857	89821917	15	-0.194926	0.802053	0.892359	28	89821934	89822007	6	-2.82912	0.000491445	0.00227153	51	ENSG00000171492	+	LRRC8D	761.155	-0.747444
chr1	107056614	107057613	107056614	107056699	107057477	107057613	107056473	107056640	26	-1.3064	1.84296e-05	0.000112505	237	107056667	107056855	1481	-1.2698	3.18723e-42	1.72937e-40	10234	107057427	107057516	59	-1.02503	5.92592e-07	4.58329e-06	591	107057531	107057663	83	-1.71781	3.29942e-06	2.28417e-05	190	ENSG00000198890	+	PRMT6	10418.1	-1.29068
chr1	107057477	107057946	107057477	107057613	107057880	107057946	107057427	107057516	59	-1.02503	5.92592e-07	4.58329e-06	591	107057531	107057663	83	-1.71781	3.29942e-06	2.28417e-05	190	107057671	107057886	9	-1.34549	0.00389081	0.0143938	92	107057937	107057994	24	-1.18722	0.0142907	0.0443311	94	ENSG00000198890	+	PRMT6	10418.1	-1.29068
chr1	108199248	108200242	108200173	108200242	108199248	108199525	108200238	108200318	18	1.15886	0.00451921	0.0163957	104	108200101	108200349	2887	-0.78764	1.26518e-23	3.38137e-22	33691	108199383	108199594	34	0.726689	0.0134379	0.042097	213	108199200	108199257	6	-0.476903	0.461926	0.642385	43	ENSG00000085491	-	SLC25A24	8785.1	-0.885336
chr1	109090647	109091219	109090647	109090772	109091164	109091219	109090594	109090678	15	0.264949	0.433735	0.617369	152	109090737	109090846	667	0.174637	0.0778347	0.178257	4807	109091116	109091169	15	1.00081	0.220524	0.389166	25	109091217	109091267	12	-1.81874	0.135845	0.272962	18	ENSG00000215717	+	TMEM167B	2129.54	0.0113632
chr1	112705276	112707217	112707126	112707217	112705276	112705297	112707212	112707286	8	0.0139904	0.980237	0.989578	51	112707074	112707133	31452	1.36745	9.48554e-59	7.97087e-57	42188	112705295	112705347	5	2.28718	0.00214657	0.00851616	38	112705226	112705294	20	3.91249	5.00692e-12	6.63737e-11	112	ENSG00000155366	-	RHOC	9790.9	1.81899
chr1	114510953	114511291	114511202	114511291	114510953	114510959	114511286	114511461	125	0.289195	0.0987338	0.214515	794	114511034	114511216	2620	0.121975	0.210462	0.376909	12720	114510960	114511010	6	4.0243	0.000522266	0.00240117	27	114510877	114510976	105	-0.0539437	0.74139	0.854441	796	ENSG00000197323	-	TRIM33	14296.2	0.0835418
chr1	145995240	145996747	145996578	145996747	145995240	145995425	145996740	145996898	10	0.914589	0.047286	0.119998	85	145996526	145996584	2763	1.64657	5.94139e-42	3.18693e-40	5684	145995425	145995474	3	2.967	0.0213928	0.0622618	14	145995205	145995241	10	1.24652	0.185846	0.343944	20	ENSG00000265972	-	TXNIP	9406.92	1.63398
chr1	147172191	147172778	147172560	147172778	147172191	147172540	147172688	147172850	223	-1.75702	7.33112e-25	2.08317e-23	984	147172420	147172662	270	0.638898	8.44771e-08	7.27671e-07	2106	147172528	147172591	23	-0.812412	0.148827	0.292335	57	147172154	147172358	69	0.756969	1.38613e-05	8.66381e-05	726	ENSG00000131791	-	PRKAB2	2335.93	0.69068
chr1	150268124	150269261	150269020	150269261	150268124	150268433	150269257	150269308	5	-1.96603	0.0788183	0.180017	19	150268945	150269030	1716	-0.334102	7.3004e-05	0.000399862	10224	150268429	150268505	13	-0.0253403	0.953683	0.976354	89	150268078	150268126	19	-1.01469	0.208119	0.373917	30	ENSG00000117362	-	APH1A	8209.45	-0.555077
chr1	150629132	150629852	150629576	150629852	150629132	150629313	150629704	150629901	138	1.53043	1.45027e-21	3.49189e-20	857	150629524	150629604	28780	0.357912	5.03865e-06	3.38671e-05	91122	150629312	150629461	25	1.71678	8.03177e-06	5.22167e-05	132	150629081	150629248	2103	-0.420327	2.02324e-05	0.000122595	10954	ENSG00000143420	-	ENSA	16576.4	0.24444
chr1	151058665	151059679	151059572	151059679	151058665	151058863	151059675	151059747	8	-0.899123	0.0654268	0.155311	80	151059520	151059605	2396	1.397	1.15623e-68	1.23725e-66	17529	151058857	151058916	580	4.40971	4.18539e-101	8.32508e-99	1380	151058620	151058749	9	2.57309	0.00132057	0.00552709	33	ENSG00000197622	-	CDC42SE1	12600.7	1.33522
chr1	151165859	151166685	151165859	151166143	151166555	151166685	151165803	151166005	370	-1.69266	4.42837e-42	2.38748e-40	2049	151166018	151166207	1514	0.222678	0.0087357	0.0290569	9937	151166506	151166559	28	2.47962	1.7445e-05	0.000107074	62	151166678	151166738	8	-0.0832871	0.910647	0.954301	29	ENSG00000163156	+	SCNM1	2599.47	0.201863
chr1	151327044	151327452	151327415	151327452	151327044	151327103	151327452	151327499	9	1.41659	0.229665	0.400439	12	151327346	151327442	739	-0.249199	0.00212119	0.00842615	5436	151327079	151327161	16	-0.474684	0.184572	0.342261	145	151326998	151327048	9	0.150423	0.828296	0.907676	33	ENSG00000143393	-	PI4KB	6329.97	0.168213
chr1	153967310	153967902	153967310	153967486	153967724	153967902	153967253	153967460	53	-0.206994	0.476471	0.655645	219	153967358	153967608	241	-0.0243839	0.869094	0.931364	1058	153967576	153967751	110	-0.0736493	0.710963	0.834959	521	153967819	153967954	113	-2.12667	1.42067e-14	2.27846e-13	353	ENSG00000143578	+	CREB3L4	1000.82	-1.11502
chr1	155002487	155003987	155002487	155002765	155003858	155003987	155002438	155002496	11	-0.025975	0.969225	0.984338	40	155002621	155002841	494	0.301458	0.000738629	0.00327704	4310	155003743	155003948	29	1.91261	7.32186e-09	7.1854e-08	170	155003911	155004057	8	1.68703	0.000279056	0.00135506	85	ENSG00000160685	+	ZBTB7B	5631.8	0.652815
chr1	155324339	155325161	155324339	155324518	155324979	155325161	155324288	155324387	16	1.3175	0.000200543	0.00100243	148	155324408	155324682	407	-1.3753	1.92125e-33	7.78595e-32	2655	155324933	155324981	14	-2.32674	0.0323674	0.0880489	23	155325161	155325209	9	-0.0258105	0.970424	0.984758	33	ENSG00000160753	+	RUSC1	3068.73	-1.24493
chr1	155562409	155562963	155562769	155562963	155562409	155562414	155562949	155563041	166	1.07981	1.14033e-08	1.09247e-07	501	155562536	155562923	253	0.306747	0.00208887	0.0083134	2953	155562400	155562452	16	0.01861	0.977405	0.988083	37	155562363	155562423	10	-0.804737	0.0725443	0.168571	92	ENSG00000116539	-	ASH1L	5433.25	0.517824
chr1	156212881	156213340	156212881	156213006	156213243	156213340	156212832	156212892	17	-0.410618	0.429603	0.613628	63	156212988	156213055	1607	-0.5616	1.71366e-09	1.80473e-08	7150	156213163	156213258	34	0.981632	0.00161715	0.00662438	175	156213309	156213398	6	-0.24984	0.637965	0.784428	63	ENSG00000260238	+	PMF1-BGLAP	14.6397	0.572329
chr1	156728405	156728891	156728715	156728891	156728405	156728468	156728838	156729005	29	-0.216137	0.334553	0.520459	388	156728639	156728742	556	0.1001	0.313035	0.49799	4478	156728455	156728531	500	0.244571	0.024273	0.069285	2107	156728367	156728469	227	-1.32627	4.41118e-32	1.70978e-30	2380	ENSG00000143319	-	ISG20L2	2870.52	-0.644674
chr1	156750240	156751930	156751673	156751930	156750240	156750396	156751816	156751986	48	1.43937	3.03367e-10	3.43405e-09	381	156751518	156751708	9643	-1.09291	5.14724e-42	2.76623e-40	87802	156750392	156750653	30	-0.606131	0.036665	0.0974261	242	156750236	156750296	6	-0.112274	0.88685	0.941066	29	ENSG00000143321	-	HDGF	19931.8	-0.958403
chr1	161132436	161132699	161132666	161132699	161132436	161132574	161132698	161132751	5	1.14429	0.15761	0.305304	24	161132535	161132806	206	-0.496378	7.9829e-05	0.000434038	1608	161132558	161132632	36	0.00420344	0.9883	0.993884	199	161132387	161132468	53	-0.974099	2.39775e-05	0.000143177	374	ENSG00000158796	-	DEDD	958.505	-0.535971
chr1	180502353	180502699	180502559	180502699	180502353	180502465	180502694	180502749	5	1.86397	0.00446274	0.0162159	45	180502475	180502647	801	0.0537432	0.521623	0.694829	6239	180502461	180502516	11	0.810415	0.211536	0.37829	37	180502244	180502416	236	0.450985	0.000288439	0.00139693	1591	ENSG00000230124	-	ACBD6	2169.83	-0.183716
chr1	182391340	182392048	182391791	182392048	182391340	182391479	182391909	182392072	8	0.421625	0.385115	0.571601	72	182391741	182391796	2294	2.23574	8.36022e-117	2.25795e-114	4132	182391468	182391555	82	2.79415	1.20925e-17	2.36907e-16	218	182391259	182391416	657	2.63937	1.5048e-84	2.23568e-82	2069	ENSG00000135821	-	GLUL	21237.9	2.35848
chr1	183472264	183473078	183472264	183472506	183473035	183473078	183472212	183472272	6	1.38425	0.0673828	0.158981	30	183472380	183472559	2397	-0.609775	1.65882e-11	2.1002e-10	10659	183472990	183473039	10	0.957159	0.212422	0.379363	27	183473079	183473128	6	0.39192	0.670079	0.807208	18	ENSG00000116698	+	SMG7	5100.27	-0.0866189
chr1	186374474	186375441	186375227	186375441	186374474	186374581	186375438	186375603	11	0.459266	0.248216	0.423501	115	186375074	186375290	1153	-0.302847	0.000219611	0.00108943	9858	186374576	186374630	15	-1.79669	0.0298494	0.0822714	34	186374426	186374479	6	-0.474306	0.639627	0.7855	17	ENSG00000047410	-	TPR	11106.1	-0.441738
chr1	198156941	198157742	198156941	198157032	198157581	198157742	198156885	198156945	3	-1.78739	0.121929	0.251885	17	198157006	198157097	1234	0.27113	0.000741232	0.00328755	9939	198157535	198157596	55	1.08429	0.00300147	0.0114619	134	198157711	198157798	2	-0.358264	0.607402	0.760949	37	ENSG00000151414	+	NEK7	2714.86	0.13259
chr1	201399323	201399632	201399531	201399632	201399323	201399490	201399632	201399710	12	-0.55901	0.344991	0.530713	50	201399492	201399583	950	-0.67281	1.70958e-11	2.16187e-10	3928	201399376	201399574	87	0.0717098	0.76189	0.867567	309	201399300	201399384	341	0.475968	5.73441e-05	0.000320167	2740	ENSG00000159166	-	LAD1	2678.22	-0.276833
chr1	201739800	201741099	201739800	201739899	201740997	201741099	201739650	201739817	28	1.19114	0.00331318	0.0124976	103	201739740	201739952	3423	0.807201	2.36799e-19	5.09106e-18	7154	201740918	201741006	15	0.0325339	0.935291	0.966775	108	201741100	201741148	9	-0.615123	0.449574	0.631043	27	ENSG00000134369	+	NAV1	116.65	-0.0341793
chr1	203305308	203306738	203305308	203305518	203306649	203306738	203305255	203305326	91	2.48462	5.56216e-26	1.66149e-24	430	203305510	203305567	16463	2.96513	1.58535e-151	7.09096e-149	26535	203306603	203306671	16	4.94828	5.50047e-06	3.67521e-05	48	203306729	203306793	7	5.34156	2.74174e-06	1.92138e-05	39	ENSG00000159388	+	BTG2	12049	3.36253
chr1	204516272	204516685	204516272	204516412	204516613	204516685	204516218	204516292	12	-0.340787	0.476181	0.655375	77	204516378	204516594	498	0.401673	4.73125e-05	0.00026834	4266	204516562	204516615	11	1.01924	0.192101	0.35254	28	204516651	204516756	32	0.489432	0.0749216	0.172968	236	ENSG00000198625	+	MDM4	6509.71	2.13497
chr1	205631470	205632077	205631978	205632077	205631470	205631562	205632044	205632127	41	1.2978	0.00443915	0.0161406	90	205631931	205632018	949	0.470051	8.11741e-06	5.27248e-05	6700	205631530	205631628	13	-1.04984	0.0149602	0.0460853	108	205631428	205631498	8	-1.20024	0.0334317	0.0903408	60	ENSG00000158711	-	ELK4	3629.88	0.225241
chr1	218345229	218345882	218345229	218345335	218345805	218345882	218345151	218345249	60	1.20771	0.000860956	0.00376252	124	218345330	218345388	1279	-0.500587	1.01127e-05	6.45731e-05	3549	218345751	218345806	3	1.05107	0.181869	0.338668	26	218345841	218345930	10	0.115868	0.72609	0.844846	159	ENSG00000092969	+	TGFB2	741.919	-0.51379
chr1	218345986	218346270	218345986	218346121	218346151	218346270	218345940	218345995	14	0.17014	0.738336	0.852491	64	218346095	218346179	34	-0.815651	0.00266104	0.0103097	273	218346101	218346158	13	0.405768	0.472148	0.65166	48	218346243	218346327	27	-0.937234	0.0094164	0.0309978	144	ENSG00000092969	+	TGFB2	741.919	-0.51379
chr1	224434291	224434903	224434767	224434903	224434291	224434684	224434892	224435035	93	-0.152327	0.384705	0.571183	619	224434728	224434821	711	0.697343	1.43068e-09	1.51845e-08	4497	224434679	224434725	9	-1.50044	0.228855	0.399514	14	224434241	224434292	10	0.889098	0.242986	0.416757	31	ENSG00000162923	-	WDR26	5394.22	0.634186
chr1	234608491	234609599	234609497	234609599	234608491	234608545	234609595	234609646	5	2.81805	0.00973149	0.0318923	19	234609267	234609608	95	0.678247	4.86138e-05	0.000275185	743	234608542	234608593	8	3.95276	0.00205466	0.00819306	15	234608286	234608528	15	1.26294	0.00252806	0.00985119	99	ENSG00000168264	-	IRF2BP2	4889.95	1.2253
chr1	234609497	234610312	234610177	234610312	234609497	234609599	234610296	234610359	7	1.2482	0.0514817	0.128599	44	234610101	234610197	1132	1.07027	1.69028e-15	2.88374e-14	3713	234609595	234609646	5	2.81805	0.00973149	0.0318923	19	234609267	234609608	95	0.678247	4.86138e-05	0.000275185	743	ENSG00000168264	-	IRF2BP2	4889.95	1.2253
chr1	234610177	234610981	234610877	234610981	234610177	234610312	234610982	234611030	5	1.66232	0.105014	0.224905	17	234610828	234610892	1549	1.75136	1.57306e-49	1.0554e-47	2319	234610296	234610359	7	1.2482	0.0514817	0.128599	44	234610101	234610197	1132	1.07027	1.69028e-15	2.88374e-14	3713	ENSG00000168264	-	IRF2BP2	4889.95	1.2253
chr1	235074169	235075623	235075489	235075623	235074169	235074208	235075624	235075670	7	2.09415	0.0242391	0.069214	21	235075439	235075494	91	3.12089	1.54881e-13	2.30876e-12	150	235074195	235074257	25	2.66095	6.2202e-08	5.44789e-07	92	235074162	235074222	8	2.9179	0.00185591	0.00748349	27	ENSG00000280587	-	LINC01348	201.562	2.59238
chr1	236523947	236524598	236523947	236523981	236524530	236524598	236523824	236523951	7	-0.0645967	0.913749	0.956035	50	236523900	236524057	130	-0.524908	0.000300822	0.00145119	1145	236524462	236524556	44	0.808562	0.00414666	0.0152165	202	236524595	236524651	6	-0.0885348	0.918663	0.958837	26	ENSG00000116977	+	LGALS8	1625.73	-0.147369
chr1	244862999	244864690	244864482	244864690	244862999	244863172	244864680	244864738	9	-2.11097	0.00705044	0.0241723	41	244864385	244864551	20657	-0.167916	0.0490272	0.123578	95188	244863156	244863248	24	1.96072	2.32532e-07	1.89963e-06	132	244862949	244863106	9	-1.0007	0.00461017	0.0166792	155	ENSG00000153187	-	HNRNPU	27039.6	-0.223545
chr1	247331690	247332053	247331866	247332053	247331690	247331806	247331941	247332104	11	-2.23259	2.77382e-05	0.000163851	95	247331792	247331895	281	-0.897555	3.70241e-14	5.76935e-13	2302	247331806	247331859	11	-1.09806	0.163513	0.313753	31	247331625	247331726	62	-1.48417	2.47765e-05	0.000147594	197	ENSG00000162714	-	ZNF496	1085.96	-0.913354
chr1	248838010	248838788	248838010	248838246	248838761	248838788	248837972	248838048	27	-0.959354	0.0459229	0.1172	89	248838217	248838474	441	0.361469	0.000308361	0.00148424	3389	248838711	248838771	11	1.82414	0.00848784	0.0283339	41	248838784	248838841	12	-0.748055	0.246335	0.421073	42	ENSG00000171161	+	ZNF672	1509.71	0.284112
chr1	248857827	248859153	248859084	248859153	248857827	248858166	248859154	248859224	5	-0.329958	0.64586	0.789958	38	248858854	248859100	446	-0.160958	0.226765	0.396932	1473	248858164	248858244	19	-0.835594	0.0432606	0.111561	104	248857780	248857829	5	0.754357	0.587776	0.746216	9	ENSG00000171163	-	ZNF692	1063.29	-0.301729
chr10	930759	932000	931699	932000	930759	930892	931983	932078	21	0.356077	0.257011	0.434288	169	931617	931788	1956	0.0437925	0.587105	0.745793	14064	930861	930943	28	2.76964	1.3616e-11	1.74005e-10	142	930740	930797	7	2.36263	0.00128202	0.00538411	39	ENSG00000107929	-	LARP4B	7772.24	0.214636
chr10	1048885	1049291	1049117	1049291	1048885	1049094	1049290	1049342	23	1.97988	0.00130553	0.00547251	48	1049069	1049125	1651	0.931978	3.48326e-18	7.02436e-17	2474	1049059	1049145	440	1.94331	8.6567e-49	5.6817e-47	1510	1048860	1048959	668	-0.188073	0.0728953	0.169251	3278	ENSG00000067064	-	IDI1	7327.64	-0.134281
chr10	13348054	13348417	13348212	13348417	13348054	13348094	13348282	13348550	64	-2.36669	1.08861e-21	2.63461e-20	486	13348162	13348318	1751	-1.92155	1.17e-100	2.31092e-98	5896	13348064	13348141	10	0.747833	0.145046	0.286861	66	13347987	13348072	546	0.721973	2.05174e-09	2.14263e-08	2462	ENSG00000086475	-	SEPHS1	2823.91	-0.902346
chr10	21533953	21535240	21533953	21534043	21535008	21535240	21533902	21533970	17	-1.06438	0.0205414	0.0601828	94	21534028	21534107	25	1.41958	0.000190472	0.000956445	118	21534957	21535033	8	-0.0870997	0.82266	0.904396	113	21535238	21535292	6	-0.982572	0.244391	0.41852	25	ENSG00000078403	+	MLLT10	1152.27	-0.552986
chr10	27155168	27156105	27155168	27155362	27155983	27156105	27155097	27155298	83	0.672128	7.38501e-05	0.000404025	655	27155344	27155414	1742	-3.35179	4.41674e-166	2.59287e-163	4428	27155931	27155986	4	-0.725586	0.39738	0.584041	25	27156104	27156155	7	-0.362434	0.671928	0.808358	24	ENSG00000120539	+	MASTL	1288.01	-2.24118
chr10	28302675	28303318	28303020	28303318	28302675	28302712	28303319	28303379	27	2.44365	0.000111386	0.0005884	55	28302962	28303051	243	0.399782	0.000103346	0.000549704	3129	28302708	28302759	7	1.91213	0.00793802	0.0267489	35	28302646	28302676	7	-3.6201	0.00952132	0.0312994	12	ENSG00000150054	-	MPP7	1679.75	0.445637
chr10	29735388	29735983	29735826	29735983	29735388	29735507	29735897	29736036	12	2.05492	7.52907e-05	0.0004114	70	29735774	29735951	398	0.0424474	0.684527	0.817363	3601	29735398	29735521	7	0.474191	0.277977	0.457821	86	29735254	29735420	9	0.120945	0.783563	0.881314	87	ENSG00000197321	-	SVIL	3450.83	0.484932
chr10	33334651	33335067	33334865	33335067	33334651	33334782	33334984	33335116	22	0.552055	0.101071	0.218208	141	33334819	33334974	588	-0.760689	1.87733e-11	2.36656e-10	2840	33334782	33334834	12	1.10744	0.103965	0.223185	36	33334471	33334670	266	-0.172695	0.0759416	0.174831	3185	ENSG00000099250	-	NRP1	3946.56	0.0723121
chr10	38010527	38011184	38010527	38010692	38011005	38011184	38010478	38010532	25	3.92406	3.12832e-06	2.17391e-05	51	38010666	38010770	978	0.590698	9.84295e-10	1.06147e-08	4026	38010959	38011027	37	1.47521	0.000230722	0.00113881	126	38011098	38011234	82	0.448368	0.0628196	0.150448	322	ENSG00000189180	+	ZNF33A	2013.32	0.610363
chr10	43408839	43409293	43409179	43409293	43408839	43408929	43409263	43409350	20	1.57658	0.000376001	0.00177752	88	43409127	43409201	2924	-0.176715	0.0562305	0.137934	11502	43408911	43408999	18	0.165491	0.628509	0.777082	142	43408765	43408869	54	-1.98158	4.92828e-20	1.0978e-18	553	ENSG00000169813	-	HNRNPF	15808.1	-0.449341
chr10	50623393	50624083	50623922	50624083	50623393	50623509	50624078	50624136	6	-1.34292	0.220435	0.389073	18	50623849	50624037	581	0.0221891	0.807369	0.895293	4076	50623489	50623546	3	-2.0191	0.0416493	0.108181	25	50623342	50623396	5	-0.698485	0.521206	0.694483	16	ENSG00000198964	-	SGMS1	967.813	-0.387866
chr10	51074403	51074772	51074403	51074486	51074705	51074772	51074336	51074410	11	1.12991	0.0407438	0.106241	55	51074460	51074559	21	-0.552806	0.14552	0.287576	118	51074654	51074709	10	1.22066	0.0471448	0.119719	44	51074770	51074822	6	0.986027	0.252176	0.428448	22	ENSG00000185532	+	PRKG1	62.0935	-0.51121
chr10	69451313	69452065	69451313	69451464	69451961	69452065	69451261	69451314	5	0.325843	0.640285	0.785897	33	69451452	69451631	2431	-1.02891	1.27194e-33	5.18193e-32	17403	69451912	69451967	36	1.00989	0.0191001	0.0566363	93	69452061	69452138	9	1.72615	0.0100577	0.0327922	38	ENSG00000099282	+	TSPAN15	3530.79	-1.29423
chr10	73772453	73773033	73772453	73772495	73772973	73773033	73772399	73772454	4	0.198641	0.785951	0.882809	30	73772481	73772775	76	-0.746252	1.31368e-06	9.65929e-06	956	73772820	73772992	51	1.07899	7.1107e-06	4.66773e-05	302	73772971	73773124	8	-0.539724	0.175736	0.330693	109	ENSG00000196968	+	FUT11	395.26	-0.837624
chr10	74825313	74826461	74825313	74825548	74826107	74826461	74825265	74825314	11	-3.58711	0.00476794	0.0171724	21	74825386	74825650	104	-1.68389	4.40311e-39	2.16786e-37	2042	74825951	74826141	80	0.407446	0.0786798	0.179769	332	74826455	74826515	13	-0.00415765	0.993444	0.996662	66	ENSG00000156650	+	KAT6B	1809.18	-0.412632
chr10	75401389	75401886	75401781	75401886	75401389	75401522	75401887	75401956	6	-0.991286	0.170523	0.323755	37	75401717	75401792	94	-0.776819	0.00626378	0.0217916	299	75401493	75401625	16	0.344425	0.327081	0.512923	146	75401336	75401413	29	1.00575	0.0140585	0.0437295	95	ENSG00000165655	-	ZNF503	341.429	-0.25798
chr10	77926320	77926933	77926753	77926933	77926320	77926439	77926921	77926986	22	-0.723613	0.118059	0.245854	83	77926681	77926779	276	0.07306	0.611745	0.764397	1054	77926316	77926456	7	1.14954	0.0239045	0.0684109	65	77926267	77926326	7	1.2539	0.0304144	0.0835372	52	ENSG00000151208	-	DLG5	8359.58	0.249305
chr10	79243343	79243902	79243343	79243450	79243832	79243902	79243296	79243348	4	2.84321	0.0323339	0.0879833	13	79243294	79243511	93	0.463169	0.00552285	0.0195315	747	79243766	79243837	24	0.90766	0.0202056	0.0593628	128	79243898	79243952	4	0.998364	0.327382	0.513254	17	ENSG00000108175	+	ZMIZ1	7868.4	1.09254
chr10	80078609	80079023	80078609	80078664	80078959	80079023	80078567	80078620	7	-1.85756	0.0359435	0.0958614	29	80078657	80078742	457	-0.82127	3.41975e-11	4.21785e-10	1636	80078836	80078965	35	-2.29426	1.35211e-13	2.02304e-12	300	80079013	80079086	64	-0.957098	9.19698e-06	5.91327e-05	465	ENSG00000133678	+	TMEM254	466.964	-0.754426
chr10	87659739	87660185	87659739	87659877	87660048	87660185	87659722	87659741	9	-0.474812	0.641038	0.78645	17	87659623	87659929	9251	0.459424	1.15468e-09	1.23575e-08	19123	87659998	87660068	47	0.491216	0.143518	0.28457	152	87660138	87660233	31	0.183292	0.460307	0.640914	274	ENSG00000198682	+	PAPSS2	12072.8	0.478925
chr10	89643915	89645373	89645241	89645373	89643915	89644117	89645265	89645438	76	4.12037	7.82602e-29	2.65056e-27	307	89645140	89645248	615	1.83404	1.36584e-66	1.38611e-64	3100	89644109	89644231	21	1.95965	1.66926e-07	1.38945e-06	134	89643868	89643916	9	0.235001	0.743662	0.855824	36	ENSG00000152782	-	PANK1	1183.15	1.95947
chr10	96832166	96832760	96832166	96832297	96832518	96832760	96832038	96832229	15	0.300955	0.334006	0.519877	170	96832270	96832344	951	0.681983	1.98927e-13	2.93636e-12	4088	96832466	96832526	3	-0.264765	0.764755	0.869583	21	96832645	96832836	43	2.48067	2.90645e-18	5.88925e-17	276	ENSG00000196233	+	LCOR	2820.26	1.32519
chr10	100285844	100286286	100286214	100286286	100285844	100286125	100286285	100286336	15	3.40616	0.000134385	0.000697596	37	100286138	100286234	223	4.97786	1.40395e-98	2.66706e-96	1205	100286119	100286180	7	1.16354	0.106771	0.227774	34	100285798	100285846	7	2.02106	0.0211781	0.0617214	24	ENSG00000196072	-	BLOC1S2	2938.62	1.32144
chr10	100987277	100987542	100987473	100987542	100987277	100987357	100987530	100987617	676	-0.933513	7.51734e-20	1.6588e-18	4331	100987396	100987512	1459	-0.255342	0.00258807	0.0100623	11149	100987301	100987397	14	0.581191	0.125699	0.257458	127	100987211	100987304	72	0.144434	0.504977	0.681078	380	ENSG00000055950	-	MRPL43	1690.63	-0.293721
chr10	102643838	102644487	102643838	102643928	102644411	102644487	102643788	102643936	13	1.86	9.96433e-06	6.36933e-05	105	102643855	102643982	182	0.450328	0.00418223	0.0153277	1034	102644347	102644423	11	0.561363	0.253038	0.429457	70	102644464	102644558	120	-1.79975	1.00458e-19	2.20294e-18	815	ENSG00000171206	+	TRIM8	4110.05	0.988893
chr10	102644411	102645073	102644411	102644487	102644984	102645073	102644347	102644423	11	0.561363	0.253038	0.429457	70	102644464	102644558	120	-1.79975	1.00458e-19	2.20294e-18	815	102644908	102644994	20	-0.738287	0.0415452	0.107974	141	102645022	102645154	5	-0.0275327	0.95981	0.979626	56	ENSG00000171206	+	TRIM8	4110.05	0.988893
chr10	103367874	103368731	103367874	103367975	103368616	103368731	103367818	103367880	9	-0.851017	0.14527	0.287197	57	103367951	103368037	136	-1.12003	5.67953e-11	6.87267e-10	893	103368552	103368645	57	1.91015	1.06381e-08	1.02333e-07	164	103368729	103368788	8	-1.51616	0.0580853	0.141516	33	ENSG00000148835	+	TAF5	344.713	-1.11939
chr10	116271236	116272441	116272186	116272441	116271236	116271358	116272439	116272493	10	-1.68736	0.00408458	0.0150134	63	116272110	116272308	2253	-1.99155	3.17677e-106	7.0486e-104	11638	116271301	116271380	8	0.296171	0.616163	0.767715	50	116271191	116271240	4	-3.4934	0.00320464	0.0121445	31	ENSG00000151892	-	GFRA1	15880.6	-2.09275
chr10	116273991	116274534	116274294	116274534	116273991	116274266	116274464	116274615	44	-2.80868	9.08898e-17	1.68571e-15	298	116274245	116274438	106	-1.56421	1.37825e-16	2.52136e-15	731	116274226	116274311	11	-2.86997	5.8189e-09	5.77966e-08	139	116273956	116274151	13	-2.34823	4.48134e-08	3.99615e-07	147	ENSG00000151892	-	GFRA1	15880.6	-2.09275
chr10	116274294	116274900	116274704	116274900	116274294	116274534	116274899	116274951	16	-2.4611	0.00107976	0.00461681	50	116274625	116274784	212	-0.999916	5.23948e-09	5.23427e-08	741	116274464	116274615	44	-2.80868	9.08898e-17	1.68571e-15	298	116274245	116274438	106	-1.56421	1.37825e-16	2.52136e-15	731	ENSG00000151892	-	GFRA1	15880.6	-2.09275
chr10	118046689	118046993	118046892	118046993	118046689	118046820	118046980	118047054	38	-1.67364	1.36567e-07	1.14879e-06	237	118046818	118046922	84	0.6141	0.0485478	0.122545	698	118046810	118046868	7	1.37119	0.0195543	0.0577624	50	118046557	118046719	28	-0.488963	0.0546648	0.134873	318	ENSG00000107560	-	RAB11FIP2	407.017	0.416592
chr10	119596004	119596750	119596664	119596750	119596004	119596089	119596726	119596815	10	-0.609466	0.242332	0.415921	66	119596596	119596684	515	0.218037	0.0195061	0.0576416	4013	119596080	119596136	3	-0.452547	0.654377	0.79604	17	119595958	119596006	11	-1.30942	0.194012	0.355184	21	ENSG00000151923	-	TIAL1	3659.96	-0.236378
chr10	119596664	119597313	119596961	119597313	119596664	119596750	119597311	119597363	4	-1.43409	0.126649	0.258844	23	119596910	119596987	1725	-0.983086	1.79383e-13	2.6618e-12	5106	119596726	119596815	10	-0.609466	0.242332	0.415921	66	119596596	119596684	515	0.218037	0.0195061	0.0576416	4013	ENSG00000151923	-	TIAL1	3659.96	-0.236378
chr10	125158717	125159145	125159040	125159145	125158717	125158854	125159143	125159193	8	3.12765	0.000683733	0.00305934	30	125159003	125159265	53	2.47625	7.40868e-21	1.72108e-19	317	125158854	125158906	27	1.29532	0.00148388	0.00613434	103	125158671	125158779	13	0.0124214	0.980918	0.990003	63	ENSG00000175029	-	CTBP2	3955	0.723591
chr10	125160868	125161182	125161029	125161182	125160868	125160980	125161175	125161233	12	-0.763798	0.20439	0.368863	53	125160950	125161070	114	-1.75175	2.06688e-12	2.83232e-11	411	125160930	125161016	19	1.735	6.36883e-07	4.89851e-06	153	125160824	125160882	7	1.78679	0.00681095	0.0234571	40	ENSG00000175029	-	CTBP2	3955	0.723591
chr11	207390	208804	207390	207490	208689	208804	207333	207429	102	0.107746	0.491337	0.66912	859	207476	207571	150	2.80605	1.75882e-75	2.23248e-73	1325	208620	208762	29	0.595244	0.142325	0.282844	106	208769	208880	137	-0.503005	0.000362888	0.00172044	1148	ENSG00000177963	+	RIC8A	3238.48	0.039533
chr11	393954	396162	393954	394208	395946	396162	393916	393958	9	-0.432066	0.648304	0.791701	20	394188	394281	1639	-0.358433	7.49119e-05	0.000409516	8374	395895	395965	19	1.16042	0.0127261	0.0401491	76	396157	396212	11	0.541163	0.44185	0.624142	33	ENSG00000184363	+	PKP3	6428.95	-0.393145
chr11	506767	507504	507194	507504	506767	506996	507471	507592	11	0.151617	0.737251	0.851738	87	507123	507290	641	-0.0785962	0.461801	0.642291	3570	506981	507043	6	-1.54867	0.0205401	0.0601828	48	506706	506811	430	-0.138719	0.283421	0.463742	1977	ENSG00000023191	-	RNH1	5158.84	-0.231435
chr11	534678	535788	535537	535788	534678	534719	535765	535845	53	1.41779	5.62904e-09	5.6016e-08	312	535368	535614	2495	1.13367	4.54009e-40	2.30235e-38	16776	534709	534960	232	3.78199	1.77346e-50	1.22485e-48	559	534455	534800	201	5.51236	3.9176e-70	4.4216e-68	916	ENSG00000174775	-	HRAS	3759.66	1.28363
chr11	560728	561768	560728	560986	561561	561768	560670	560738	73	0.195264	0.351786	0.537379	397	560961	561112	191	-0.185069	0.168214	0.320461	1966	561449	561607	8	0.357892	0.441811	0.624115	75	561694	561820	5	-1.26182	0.0579422	0.141264	46	ENSG00000099849	+	RASSF7	1728.09	-0.277084
chr11	706518	707437	706518	706615	707295	707437	706469	706523	60	4.97917	2.32633e-10	2.65719e-09	100	706608	706697	81	3.90529	1.03234e-42	5.71884e-41	458	707220	707302	31	5.46277	1.28799e-12	1.79347e-11	138	707435	707487	11	1.06379	0.234012	0.405713	23	ENSG00000177106	+	EPS8L2	13976.8	2.01118
chr11	803376	804445	804381	804445	803376	803399	804436	804574	15	6.32861	5.15954e-09	5.15625e-08	75	804181	804411	162	6.38687	4.26224e-71	4.89556e-69	1151	803391	803469	20	4.9595	2.64532e-10	3.00895e-09	98	803329	803378	12	3.52589	0.0106804	0.0345072	12	ENSG00000177595	-	PIDD1	4483.95	2.92987
chr11	804381	805411	805013	805411	804381	804445	805393	805465	8	-0.135109	0.786324	0.88303	69	804966	805237	387	3.47555	1.09289e-89	1.76989e-87	1342	804436	804574	15	6.32861	5.15954e-09	5.15625e-08	75	804181	804411	162	6.38687	4.26224e-71	4.89556e-69	1151	ENSG00000177595	-	PIDD1	4483.95	2.92987
chr11	832852	833476	832852	832951	833391	833476	832805	832893	11	-0.639759	0.213214	0.380355	75	832934	833024	770	0.103539	0.282901	0.463251	3796	833339	833397	4	0.429464	0.676577	0.811623	16	833474	833528	3	-0.109483	0.927308	0.963092	12	ENSG00000177697	+	CD151	4733.65	-0.0047691
chr11	1572270	1573300	1572270	1572533	1573047	1573300	1572167	1572274	105	1.48887	4.07447e-19	8.65425e-18	773	1572411	1572659	588	1.64267	9.80781e-49	6.41232e-47	2294	1572998	1573062	97	-0.758048	0.0409582	0.106679	162	1573225	1573347	10	1.36428	0.0463291	0.118041	35	ENSG00000233930	+	KRTAP5-AS1	1365.04	1.77505
chr11	2269363	2271185	2271012	2271185	2269363	2269600	2271184	2271239	3	-2.76313	0.00740652	0.025202	30	2270915	2271044	96	-2.25068	3.22371e-39	1.59368e-37	1084	2269597	2269650	6	1.26711	0.0948755	0.208023	31	2269318	2269454	13	1.03982	0.0527077	0.131042	56	ENSG00000183734	-	ASCL2	618.889	-1.68134
chr11	2928664	2929545	2929419	2929545	2928664	2928911	2929546	2929610	2	0.5972	0.46533	0.645291	25	2929372	2929429	16099	-0.334327	0.000162764	0.000829681	22146	2928911	2928967	4	0.151285	0.874807	0.934605	18	2928620	2928673	12	0.180574	0.808743	0.895951	31	ENSG00000181649	-	PHLDA2	2272.53	-0.367438
chr11	8964117	8964509	8964437	8964509	8964117	8964221	8964503	8964581	48	0.921914	0.00118719	0.00502379	228	8964353	8964461	781	0.217409	0.0164687	0.0499675	5679	8964196	8964275	8	2.06098	0.000152748	0.00078335	66	8964074	8964131	3	-0.646233	0.476061	0.655316	21	ENSG00000175348	-	TMEM9B	1204.5	-0.16747
chr11	9460624	9461444	9460624	9461011	9461332	9461444	9460574	9460643	290	1.00655	4.84054e-11	5.89201e-10	882	9460997	9461160	413	0.651518	1.1258e-07	9.56489e-07	1758	9461284	9461336	8	0.618833	0.382485	0.568986	36	9461418	9461493	15	0.115185	0.857516	0.925259	40	ENSG00000166478	+	ZNF143	803.21	0.757369
chr11	17013855	17014311	17013855	17013986	17014199	17014311	17013782	17013884	133	0.588252	0.000452838	0.00210962	676	17013974	17014108	337	0.645938	1.58365e-06	1.14984e-05	1683	17014148	17014231	26	0.301575	0.167755	0.319839	378	17014167	17014373	111	0.530633	0.00602402	0.0210737	516	ENSG00000184669	+	OR7E14P	490.9	1.05301
chr11	17014199	17014525	17014413	17014525	17014199	17014311	17014507	17014592	60	1.02562	0.00435092	0.0158614	127	17014353	17014439	812	-0.131904	0.222629	0.391833	2947	17014167	17014373	111	0.530633	0.00602402	0.0210737	516	17014148	17014231	26	0.301575	0.167755	0.319839	378	ENSG00000166689	-	PLEKHA7	2268.1	0.465112
chr11	45804282	45805182	45804282	45804405	45804968	45805182	45804237	45804296	4	-0.580967	0.508123	0.683738	24	45804299	45804483	284	-1.09942	1.0703e-27	3.43112e-26	3417	45804906	45804999	72	-0.265881	0.221137	0.389906	472	45805156	45805234	156	-0.559491	0.0029019	0.0111214	712	ENSG00000181830	+	SLC35C1	4226.48	-1.27899
chr11	46121179	46121607	46121453	46121607	46121179	46121298	46121579	46121655	17	0.75084	0.0762415	0.175388	93	46121382	46121492	178	-0.597672	1.12835e-05	7.15252e-05	1591	46121294	46121431	4	0.538114	0.36196	0.547657	46	46121041	46121249	20	-1.70604	3.02067e-09	3.10124e-08	276	ENSG00000135365	-	PHF21A	542.326	-1.24997
chr11	46845799	46846411	46846277	46846411	46845799	46845892	46846404	46846462	61	-0.290242	0.503377	0.679834	99	46846218	46846317	1650	-1.11287	6.35576e-24	1.72485e-22	4780	46845891	46845942	12	1.16249	0.0954659	0.208978	35	46845751	46845804	4	0.185497	0.854614	0.923633	15	ENSG00000175216	-	CKAP5	11698	-0.493175
chr11	47214841	47215730	47214841	47215044	47215419	47215730	47214787	47214863	31	-1.38241	0.000498014	0.00229892	134	47214968	47215129	1850	2.54902	1.10875e-226	1.53655e-223	14723	47215348	47215425	23	3.78575	2.92161e-11	3.62196e-10	102	47215726	47215780	9	1.55756	0.0951169	0.20843	23	ENSG00000134574	+	DDB2	11267.7	2.49363
chr11	59142777	59143173	59142777	59142858	59143027	59143173	59142709	59142786	8	-0.435277	0.204967	0.36966	147	59142746	59142958	167	0.805908	6.39183e-06	4.22669e-05	580	59142961	59143032	16	0.250949	0.439546	0.622226	160	59143151	59143328	54	-0.524664	0.0131216	0.0412583	441	ENSG00000166801	+	FAM111A	1781.84	-0.373998
chr11	61161142	61161750	61161616	61161750	61161142	61161377	61161748	61161893	15	-0.0641646	0.856241	0.924505	129	61161607	61161691	542	0.793211	2.01351e-16	3.64094e-15	6009	61161360	61161641	20	1.16644	6.59772e-05	0.000364706	205	61161066	61161156	44	0.00988141	0.972538	0.985529	208	ENSG00000167987	-	VPS37C	3735.75	0.807818
chr11	61293622	61294965	61294866	61294965	61293622	61293948	61294937	61295071	35	6.77521	2.8208e-15	4.74168e-14	249	61294786	61295070	119	6.88866	1.95971e-29	6.80076e-28	546	61293937	61294070	42	5.13189	1.12584e-15	1.94273e-14	164	61293576	61293628	10	5.07973	4.63012e-05	0.000262957	19	ENSG00000167992	-	VWCE	971.859	6.79907
chr11	61816147	61816984	61816854	61816984	61816147	61816461	61816971	61817057	39	3.99449	1.95114e-17	3.78306e-16	181	61816782	61817022	4761	1.26767	6.07467e-59	5.13015e-57	9834	61816241	61816700	173	0.554716	0.000292422	0.00141452	880	61816102	61816184	10	1.03688	0.059824	0.144792	56	ENSG00000149485	-	FADS1	9508.49	1.13634
chr11	61967165	61967782	61967630	61967782	61967165	61967293	61967761	61967912	74	0.749414	2.6747e-05	0.000158417	615	61967580	61967638	328049	0.323299	0.000179591	0.000907031	409878	61967290	61967555	36	1.21562	0.00011482	0.000604986	196	61967097	61967190	20	3.51582	7.59706e-12	9.9308e-11	114	ENSG00000167996	-	FTH1	15655.1	0.146138
chr11	62600644	62601306	62601246	62601306	62600644	62600708	62601287	62601371	12	0.352025	0.450937	0.632284	75	62601195	62601305	248	-0.213123	0.0485651	0.122574	2383	62600704	62600758	17	4.05475	2.42111e-05	0.00014446	40	62600643	62600697	6	1.52198	0.0127488	0.0402095	44	ENSG00000149480	-	MTA2	12626.2	0.923693
chr11	62671614	62671867	62671614	62671672	62671755	62671867	62671512	62671619	10	-0.071352	0.863317	0.927903	99	62671659	62671724	6557	-0.308302	0.00101492	0.00436448	16790	62671705	62671866	33	-1.47091	1.27624e-06	9.40447e-06	241	62671849	62671953	279	-0.0495238	0.69965	0.827396	1675	ENSG00000204922	+	UQCC3	1252.29	-0.43728
chr11	62727192	62727680	62727456	62727680	62727192	62727198	62727672	62727743	12	-0.073395	0.868577	0.93107	82	62727406	62727598	2879	0.297918	0.000240552	0.00118249	17548	62727187	62727237	6	0.389838	0.544139	0.713654	38	62727121	62727226	1836	-0.907926	8.39457e-24	2.26289e-22	19887	ENSG00000214753	-	HNRNPUL2	2853.2	-0.435785
chr11	63986315	63986839	63986315	63986445	63986755	63986839	63986242	63986336	58	-0.906271	0.0119119	0.0379179	150	63986423	63986496	1977	0.210313	0.0197196	0.0581489	10519	63986704	63986775	13	0.735825	0.154531	0.300764	59	63986824	63986892	9	-1.86195	0.00292907	0.0112148	58	ENSG00000167770	+	OTUB1	5876.27	0.129169
chr11	64226168	64226935	64226168	64226280	64226803	64226935	64226047	64226230	313	0.122606	0.211848	0.378704	3116	64226249	64226354	889	-0.36539	3.99542e-05	0.000229517	6721	64226753	64226807	4	-1.31238	0.0879749	0.196104	34	64226909	64227068	16	-1.69999	6.69007e-08	5.83705e-07	247	ENSG00000149761	+	NUDT22	1352.38	-0.469702
chr11	64240890	64241620	64240890	64241094	64241251	64241620	64240841	64240908	22	-0.600715	0.229131	0.399848	80	64240951	64241138	2092	-0.366658	3.92455e-05	0.00022566	24409	64241205	64241256	11	2.36694	0.0113001	0.0362241	25	64241426	64241723	193	0.954	1.56552e-19	3.40038e-18	2536	ENSG00000173486	+	FKBP2	58.6678	0.50809
chr11	64245718	64246318	64245718	64245955	64246240	64246318	64245699	64245927	41	2.54576	9.08989e-24	2.44643e-22	352	64245930	64246034	2766	1.6167	1.17594e-65	1.16815e-63	5999	64246093	64246246	54	-1.15652	0.000239915	0.00117963	217	64246319	64246368	5	1.16145	0.118842	0.247054	30	ENSG00000256940	+	PPP1R14B-AS1	213.804	1.36573
chr11	64246240	64247092	64246848	64247092	64246240	64246318	64247066	64247139	20	-0.348695	0.306401	0.490492	145	64246798	64246966	2452	-0.596847	8.13403e-10	8.83601e-09	17614	64246319	64246368	5	1.16145	0.118842	0.247054	30	64246093	64246246	54	-1.15652	0.000239915	0.00117963	217	ENSG00000173457	-	PPP1R14B	2114.87	-0.564785
chr11	65084039	65084704	65084039	65084243	65084365	65084704	65084001	65084100	775	-3.19347	2.69196e-137	9.89425e-135	6131	65084200	65084296	2283	0.384721	5.33613e-06	3.57461e-05	12783	65084313	65084372	3	0.311687	0.671101	0.807879	29	65084705	65084752	16	-1.31765	0.140626	0.280345	26	ENSG00000162300	+	ZFPL1	1926.32	0.355926
chr11	65181839	65182458	65181839	65181927	65182397	65182458	65181801	65181849	17	0.815208	0.0833644	0.188043	87	65181792	65182101	6725	0.868384	5.00379e-27	1.55916e-25	34891	65182348	65182398	9	1.32047	0.147661	0.290727	20	65182450	65182609	355	2.79981	3.76796e-102	7.65693e-100	1908	ENSG00000014216	+	CAPN1	19317.6	0.991277
chr11	65539862	65540783	65540625	65540783	65539862	65540017	65540778	65540835	13	0.430829	0.462998	0.643248	46	65540565	65540656	1224	0.0795753	0.469881	0.649453	7700	65540006	65540075	23	0.0522317	0.899154	0.947625	105	65539811	65539885	310	-1.09421	3.97423e-14	6.17811e-13	1638	ENSG00000168056	-	LTBP3	4850.64	0.403015
chr11	65570423	65572569	65570423	65570458	65572449	65572569	65570275	65570430	156	1.73835	4.53331e-36	2.02018e-34	1258	65570441	65570530	2700	-0.195736	0.0328928	0.0892025	6032	65572401	65572454	42	1.54661	0.00168184	0.00686044	71	65572543	65572722	1369	0.764394	9.65166e-17	1.78732e-15	11526	ENSG00000173465	+	ZNRD2	1241.89	-0.357408
chr11	65711870	65712623	65711870	65712033	65712450	65712623	65711824	65711899	11	-1.56498	0.0165655	0.0502197	49	65712010	65712105	178	0.511926	0.000765717	0.00338284	899	65712383	65712475	13	1.0162	0.044621	0.114469	65	65712618	65712677	9	-0.0740854	0.938416	0.968656	17	ENSG00000172977	+	KAT5	2327.72	0.523966
chr11	65857636	65859555	65859341	65859555	65857636	65857752	65859556	65859603	10	1.35639	0.110696	0.234049	24	65859286	65859479	95	2.55744	1.54424e-31	5.86978e-30	508	65857748	65857805	10	2.74722	0.000215027	0.00106845	42	65857576	65857643	14	1.06377	0.0637377	0.152173	52	ENSG00000172757	-	CFL1	45421.9	0.142338
chr11	65860426	65861436	65860426	65860676	65861274	65861436	65860252	65860429	6	-0.378724	0.433935	0.617498	71	65860422	65860822	114	-0.119118	0.217844	0.386125	3103	65861109	65861395	94	0.711032	0.000108241	0.000573646	545	65861435	65861474	6	-0.524377	0.636576	0.783347	14	ENSG00000172732	+	MUS81	2035.12	0.136413
chr11	65899369	65900459	65900387	65900459	65899369	65899477	65900456	65900507	9	5.34553	1.15523e-05	7.31414e-05	22	65900336	65900426	1505	4.79159	1.24908e-289	5.27962e-286	4908	65899424	65899505	9	7.22651	7.72584e-12	1.0096e-10	138	65899323	65899375	7	5.18589	6.03685e-06	4.0092e-05	35	ENSG00000175592	-	FOSL1	1412.53	4.9902
chr11	65919033	65921329	65919033	65919274	65920931	65921329	65918982	65919078	953	0.51668	3.06547e-07	2.46708e-06	3446	65919268	65919327	1268	1.91132	1.63588e-58	1.36516e-56	2794	65920884	65920933	14	-1.06788	0.302635	0.486	19	65921330	65921381	4	-1.59673	0.259184	0.436784	10	ENSG00000175550	+	DRAP1	3051.87	-0.553714
chr11	66257586	66258516	66257586	66257702	66258408	66258516	66257549	66257626	13	-1.53139	0.00694563	0.0238575	67	66257670	66257825	1251	-0.839265	1.88605e-16	3.4163e-15	6973	66258343	66258423	37	0.0352843	0.91326	0.955688	154	66258498	66258628	8	-1.14255	0.0229236	0.0660127	82	ENSG00000174996	+	KLC2	4980.36	-0.746301
chr11	67303295	67304175	67303295	67303556	67304017	67304175	67303248	67303323	7	0.134881	0.805495	0.894129	55	67303441	67303638	4831	0.0231623	0.764061	0.869019	19021	67303943	67304023	29	-0.573422	0.171375	0.324844	108	67304170	67304247	180	-0.149454	0.351028	0.536595	815	ENSG00000172830	+	SSH3	6113.37	-0.0843547
chr11	67353299	67353834	67353519	67353834	67353299	67353386	67353831	67353910	16	1.46323	0.00333789	0.012575	75	67353468	67353560	4052	1.02879	1.68934e-38	8.09582e-37	21821	67353372	67353433	10	2.20136	0.0104564	0.0339039	26	67353224	67353332	391	0.462457	0.000510332	0.00235077	1291	ENSG00000175482	-	POLD4	1693.48	1.00837
chr11	67372988	67373915	67373597	67373915	67372988	67373064	67373914	67373962	10	0.0466533	0.963451	0.981598	18	67373546	67373779	988	0.576015	1.38316e-08	1.31039e-07	3693	67373032	67373086	5	0.458788	0.508889	0.684369	36	67372913	67373015	75	-0.17378	0.373123	0.55936	521	ENSG00000175505	-	CLCF1	676.255	0.525967
chr11	69640953	69643175	69640953	69641155	69643101	69643175	69640745	69641001	103	1.02893	1.06631e-14	1.72552e-13	1189	69641145	69641221	52761	0.992586	1.4246e-05	8.88979e-05	82417	69643054	69643102	7	1.74485	0.0577769	0.140943	21	69643021	69643250	81	0.634281	8.65351e-05	0.000467165	741	ENSG00000110092	+	CCND1	71706.3	1.0571
chr11	70270476	70271218	70270476	70270735	70271115	70271218	70270312	70270510	425	0.646923	5.488e-09	5.46833e-08	2454	70270712	70270809	7273	0.843229	1.67095e-24	4.6619e-23	23752	70271070	70271120	8	1.18474	0.167343	0.319301	22	70271216	70271268	11	0.642413	0.391257	0.577966	31	ENSG00000131626	+	PPFIA1	7532.68	0.690194
chr11	72112234	72112874	72112775	72112874	72112234	72112511	72112859	72112925	12	0.352558	0.544253	0.71376	49	72112640	72112793	1078	0.307108	0.00147682	0.00610733	9655	72112507	72112558	4	1.14992	0.135826	0.272936	29	72112185	72112272	81	-0.864276	0.000990953	0.00426969	292	ENSG00000110200	-	ANAPC15	1901.82	0.111993
chr11	72223775	72225336	72223775	72223893	72225117	72225336	72223713	72223792	11	-0.115395	0.790341	0.885357	88	72223866	72223976	1017	-0.749833	3.18176e-16	5.67695e-15	5493	72225069	72225143	12	-0.19613	0.652951	0.794992	96	72225294	72225347	6	0.195293	0.778096	0.878093	34	ENSG00000165458	+	INPPL1	9432.05	-0.548832
chr11	72780721	72781322	72781247	72781322	72780721	72780825	72781319	72781428	19	1.68915	0.000562076	0.00256564	81	72781164	72781283	4158	0.88171	6.55237e-26	1.95176e-24	33123	72780798	72780925	15	5.18835	3.41567e-11	4.21345e-10	114	72780666	72780807	308	5.32855	2.26003e-76	2.91686e-74	970	ENSG00000214530	-	STARD10	20717.7	0.0426394
chr11	72814308	72814995	72814308	72814431	72814644	72814995	72814255	72814313	4	-0.306699	0.64504	0.789373	37	72814389	72814482	461	-0.511533	0.000302304	0.00145799	1471	72814597	72814651	10	-0.469225	0.505734	0.681818	36	72814993	72815046	11	0.149221	0.860879	0.926684	22	ENSG00000168010	+	ATG16L2	1327.23	0.0224415
chr11	73218162	73218563	73218162	73218281	73218512	73218563	73218106	73218197	23	0.62976	0.0572593	0.139922	154	73218271	73218429	490	0.0553721	0.647876	0.791308	2695	73218467	73218515	14	1.42474	0.0646848	0.153906	27	73218560	73218639	47	0.475922	0.127961	0.260951	193	ENSG00000175591	+	P2RY2	2103.95	0.112321
chr11	73308147	73309368	73308147	73308292	73309253	73309368	73308096	73308166	14	-1.918	0.0047298	0.0170551	54	73308253	73308353	56	-0.418721	0.0422065	0.109309	482	73309179	73309472	21	2.44155	4.56811e-18	9.14878e-17	265	73309369	73309516	7	0.505151	0.344743	0.530436	56	ENSG00000110237	+	ARHGEF17	1877.28	-0.100492
chr11	74493073	74493843	74493073	74493379	74493687	74493843	74493005	74493086	19	-3.9011	9.75282e-08	8.34056e-07	105	74493258	74493458	227	0.331819	0.0234731	0.0673656	892	74493635	74493743	211	-0.224767	0.114655	0.240454	1008	74493844	74493891	9	-0.987399	0.343912	0.529687	18	ENSG00000254837	+	ENSG00000254837	292.046	0.235621
chr11	75562195	75562827	75562195	75562252	75562734	75562827	75562147	75562202	9	-0.843726	0.312024	0.496756	27	75562246	75562382	2845	-1.88666	2.46656e-72	2.892e-70	5217	75562683	75562749	102	-0.379306	0.171193	0.32461	259	75562811	75562900	25	-0.640386	0.0432998	0.111645	212	ENSG00000149257	+	SERPINH1	5433.19	-1.82855
chr11	76783052	76784192	76783052	76783356	76784024	76784192	76782993	76783085	26	-0.812622	0.0284597	0.0791222	135	76783248	76783407	4822	1.21274	7.21617e-33	2.87613e-31	8918	76783973	76784027	9	2.30144	0.000113906	0.000600549	57	76784167	76784245	68	2.35099	8.51662e-17	1.5799e-15	270	ENSG00000182704	+	TSKU	3458.56	1.32138
chr11	114399698	114400651	114400457	114400651	114399698	114400094	114400559	114400722	160	-0.0370587	0.742932	0.855302	1973	114400325	114400558	247	0.619004	6.82391e-07	5.22666e-06	1399	114400027	114400101	11	-1.52179	0.00538906	0.0191077	73	114399652	114399699	11	0.0379442	0.964521	0.982181	25	ENSG00000180425	-	C11orf71	336.679	0.385185
chr11	118530890	118531191	118531140	118531191	118530890	118530999	118531191	118531240	67	-1.76427	0.000226726	0.00112098	99	118531069	118531165	241	0.807746	6.829e-06	4.49608e-05	672	118530998	118531087	7	-1.05651	0.074633	0.172453	56	118530841	118530972	43	1.69891	1.29158e-08	1.22887e-07	209	ENSG00000255435	-	ENSG00000255435	117.468	0.857671
chr11	118790947	118791254	118791163	118791254	118790947	118791030	118791227	118791365	101	1.23477	9.79833e-10	1.05706e-08	546	118791096	118791190	3195	-0.395383	5.90398e-06	3.92651e-05	31505	118791025	118791079	10	0.771183	0.160583	0.309642	55	118790874	118790977	2649	-1.344	9.71812e-46	5.84719e-44	7449	ENSG00000110367	-	DDX6	9525.39	-0.364779
chr11	118925031	118925630	118925506	118925630	118925031	118925165	118925561	118925677	11	1.4414	0.0737076	0.170764	27	118925347	118925627	114	0.634376	0.00275727	0.010637	435	118925116	118925218	106	0.828108	3.20042e-05	0.000186909	439	118924985	118925032	12	1.52383	0.135228	0.272021	16	ENSG00000186174	-	BCL9L	20113.1	0.575764
chr11	119084793	119085244	119084793	119084913	119085104	119085244	119084747	119084810	16	-2.48282	0.00265809	0.0103009	42	119084862	119084968	884	-0.934456	1.65454e-26	5.04575e-25	9034	119085057	119085131	20	-0.0591738	0.891389	0.943612	86	119085223	119085295	40	0.190881	0.711419	0.83525	65	ENSG00000256269	+	HMBS	2125.93	-0.957536
chr12	2794875	2796056	2794875	2795024	2795882	2796056	2794818	2794885	39	-1.92606	0.000328183	0.00157106	91	2794988	2795077	11113	-0.826435	6.76255e-24	1.83054e-22	41919	2795836	2795904	10	-1.24777	0.144371	0.285859	29	2796022	2796228	78	-0.019827	0.922894	0.960905	436	ENSG00000004478	+	FKBP4	17668.5	-1.00763
chr12	6383993	6385071	6383993	6384167	6384904	6385071	6383837	6384113	11	0.550383	0.0944515	0.207294	151	6383964	6384238	4262	0.465	1.78073e-09	1.87257e-08	22627	6384858	6384908	11	-0.756982	0.35952	0.545047	26	6385056	6385124	15	-0.578268	0.193669	0.354657	89	ENSG00000111321	+	LTBR	7997.73	0.359687
chr12	6534356	6535380	6534356	6534516	6535322	6535380	6534231	6534364	7	-0.265679	0.583432	0.743084	75	6534510	6534569	188757	-0.084119	0.330917	0.516821	351044	6535273	6535327	3	3.0031	0.0208145	0.0608366	14	6535373	6535433	15	0.409182	0.465794	0.645631	52	ENSG00000111640	+	GAPDH	69069	-0.222312
chr12	6688924	6689747	6689509	6689747	6688924	6689088	6689717	6689818	42	0.802907	0.0119946	0.0381493	162	6689222	6689604	156	1.14007	2.015e-30	7.26086e-29	2721	6688960	6689145	23	0.451069	0.100945	0.218014	228	6688861	6688951	100	-1.61153	1.02819e-27	3.3024e-26	1250	ENSG00000126746	-	ZNF384	2143.66	-6.05097e-05
chr12	6927764	6928504	6927764	6927800	6928425	6928504	6927716	6927783	7	-0.37942	0.518141	0.692307	49	6927676	6927880	431	-0.0850445	0.542535	0.712414	2538	6928379	6928428	22	-0.442106	0.472498	0.651983	45	6928500	6928616	6	-1.46273	0.0279071	0.0778136	51	ENSG00000111676	+	ATN1	4708.48	-0.392318
chr12	9447844	9448294	9448193	9448294	9447844	9447981	9448291	9448348	14	-0.423808	0.492242	0.669846	45	9448140	9448238	297	-2.29127	5.72575e-70	6.37723e-68	2080	9447977	9448034	66	-1.60982	6.48161e-06	4.28338e-05	177	9447793	9447866	43	-3.2666	4.63289e-07	3.63713e-06	195	ENSG00000214826	-	DDX12P	436.703	-2.02479
chr12	12561112	12562350	12562268	12562350	12561112	12561155	12562350	12562400	6	0.486812	0.617438	0.768759	20	12562220	12562306	74	1.22361	3.85937e-12	5.168e-11	734	12561142	12561312	14	0.733612	0.0391439	0.102846	148	12560995	12561118	14	0.983053	0.0293825	0.0811964	82	ENSG00000111266	-	DUSP16	3823.08	1.03508
chr12	45729540	45729936	45729540	45729687	45729698	45729936	45729484	45729573	37	1.19055	0.000246103	0.00120788	169	45729682	45729771	383	0.249327	0.0132572	0.0416063	3160	45729662	45729715	16	0.186247	0.785225	0.882299	37	45729904	45730013	63	0.220172	0.43977	0.622355	199	ENSG00000189079	+	ARID2	3101.08	0.102165
chr12	46267930	46269048	46269011	46269048	46267930	46267955	46269042	46269109	227	0.783103	2.86725e-08	2.61812e-07	1106	46268549	46269125	2448	-0.264766	0.000216399	0.0010747	35256	46267950	46268005	6	1.89952	0.0319534	0.0871218	23	46267885	46267934	8	0.0888888	0.926002	0.962446	18	ENSG00000111371	-	SLC38A1	31358.1	-0.277497
chr12	46371461	46373000	46372770	46373000	46371461	46371481	46372999	46373050	4	-0.576226	0.494504	0.671866	24	46372720	46372786	33437	1.10645	1.06566e-53	7.94415e-52	68063	46371477	46371615	13	1.9135	6.04609e-06	4.01408e-05	104	46371404	46371481	163	1.43435	4.91174e-07	3.83893e-06	233	ENSG00000134294	-	SLC38A2	21291.1	1.14852
chr12	47079524	47080075	47079935	47080075	47079524	47079621	47080073	47080136	15	2.64267	7.4689e-07	5.68974e-06	81	47079872	47079963	1808	-0.123046	0.196898	0.35907	6941	47079588	47079696	412	2.03569	5.81652e-61	5.1813e-59	2064	47079471	47079574	72	1.24362	3.87804e-10	4.34793e-09	547	ENSG00000139211	-	AMIGO2	5855.49	0.363505
chr12	47758879	47759228	47758879	47758984	47759107	47759228	47758804	47758884	9	1.41426	0.0262522	0.0739161	44	47758964	47759053	18	-1.27652	0.000153906	0.000788423	186	47759027	47759114	16	-0.110418	0.782025	0.880358	105	47759194	47759279	5	0.389117	0.452996	0.634151	60	ENSG00000211584	+	SLC48A1	1758.6	0.860089
chr12	48105854	48106115	48106024	48106115	48105854	48105922	48106114	48106186	8	-0.105437	0.828534	0.907866	68	48105944	48106134	214	-1.37981	1.47632e-23	3.93696e-22	1450	48105908	48105991	12	-0.232353	0.643362	0.78821	64	48105790	48105877	56	-2.43733	5.13922e-16	9.03973e-15	330	ENSG00000079387	-	SENP1	1056.96	-1.14359
chr12	48818429	48818744	48818429	48818524	48818609	48818744	48818361	48818449	9	0.77181	0.0836725	0.188587	85	48818493	48818582	76	0.268501	0.220195	0.388773	386	48818522	48818634	6	0.571415	0.257104	0.434396	72	48818656	48818792	17	-1.18251	0.00234479	0.00920666	129	ENSG00000167535	+	CACNB3	1611.58	-0.346167
chr12	48956512	48957580	48957486	48957580	48956512	48956715	48957578	48957706	5	-0.559266	0.283519	0.463867	62	48957381	48957494	4692	-0.338986	6.04802e-05	0.000336631	43330	48956698	48956767	7	0.104734	0.814447	0.899484	85	48956389	48956541	13	0.583678	0.0836613	0.188572	156	ENSG00000134287	-	ARF3	10149.4	-0.244548
chr12	49130740	49131605	49131394	49131605	49130740	49130888	49131601	49131656	68	-2.17824	1.69926e-07	1.41303e-06	147	49131344	49131400	77986	-2.89321	6.75551e-273	1.84221e-269	110069	49130882	49130983	21	-0.225878	0.483413	0.661988	185	49130691	49130741	7	0.0186515	0.984931	0.992036	16	ENSG00000123416	-	TUBA1B	25930.1	-3.0709
chr12	50085082	50085670	50085082	50085341	50085551	50085670	50085031	50085085	4	-1.22801	0.142454	0.283012	29	50085200	50085409	1604	-0.731721	2.12293e-16	3.83306e-15	10074	50085438	50085582	13	0.536366	0.100469	0.217285	153	50085651	50085732	4	-0.578065	0.418817	0.604338	33	ENSG00000066117	+	SMARCD1	2572.57	-0.379448
chr12	51269968	51270335	51270209	51270335	51269968	51270052	51270300	51270359	14	-0.131584	0.709639	0.83396	140	51270133	51270234	533	-0.500774	5.89878e-06	3.92367e-05	2720	51270043	51270126	16	-1.09335	0.019562	0.0577814	93	51269772	51270000	42	-1.8035	1.06626e-15	1.84255e-14	492	ENSG00000170545	-	SMAGP	534.532	-0.566262
chr12	51391409	51391735	51391645	51391735	51391409	51391428	51391732	51391786	23	1.20435	0.00925375	0.0305445	86	51391595	51391682	53	-0.615756	0.00255233	0.00993572	471	51391425	51391510	13	0.38929	0.327167	0.513	113	51391351	51391414	2	-0.927199	0.261621	0.439497	28	ENSG00000139629	-	GALNT6	1407.02	-0.395477
chr12	52901861	52904051	52903710	52904051	52901861	52901956	52904049	52904102	27	1.2642	0.00340866	0.0128109	87	52903417	52903962	216	0.6923	2.92933e-09	3.01148e-08	1771	52901951	52902029	16	0.242184	0.608574	0.761786	98	52901793	52901868	11	-0.777546	0.137216	0.275124	68	ENSG00000170421	-	KRT8	328407	0.147716
chr12	52904823	52905346	52905058	52905346	52904823	52904841	52905205	52905393	28	-0.18711	0.587108	0.745793	151	52905007	52905067	26654	0.295747	0.000268071	0.00130615	76179	52904753	52904894	36	0.136981	0.684636	0.817413	146	52904752	52904830	3827	-0.129776	0.662444	0.80195	10346	ENSG00000170421	-	KRT8	328407	0.147716
chr12	52906485	52907442	52907298	52907442	52906485	52906626	52907439	52907492	10	-0.46632	0.550468	0.718564	28	52907229	52907305	25	1.47726	7.11451e-05	0.000390845	124	52906625	52906674	11	-0.542872	0.562791	0.727544	20	52906439	52906491	9	0.667485	0.40901	0.595366	24	ENSG00000170421	-	KRT8	328407	0.147716
chr12	53054214	53054571	53054407	53054571	53054214	53054246	53054550	53054652	8	-2.70812	5.75061e-06	3.83185e-05	87	53054333	53054432	214	-0.361892	0.00572086	0.0201424	1372	53054243	53054300	3	0.00450242	0.996188	0.99802	19	53054166	53054219	3	-1.27606	0.228451	0.399068	17	ENSG00000257337	-	ENSG00000257337	555.84	-0.660978
chr12	53180597	53181101	53180597	53180721	53181056	53181101	53180365	53180663	137	0.689837	2.42212e-06	1.71273e-05	935	53180597	53180799	568	0.775191	1.5877e-21	3.81735e-20	5841	53181007	53181063	23	3.41873	5.11439e-08	4.52581e-07	72	53181010	53181171	152	-1.87474	3.51349e-22	8.73836e-21	741	ENSG00000139651	+	ZNF740	2756.67	0.703481
chr12	53252017	53252756	53252017	53252180	53252589	53252756	53251963	53252045	11	0.297304	0.476148	0.655361	94	53252068	53252256	1826	-0.164967	0.0424618	0.109863	10846	53252540	53252594	15	-0.752121	0.261207	0.439056	42	53252740	53252803	8	-3.63101	1.51751e-05	9.41675e-05	70	ENSG00000182544	+	MFSD5	1689.95	-0.121154
chr12	53380701	53381233	53380701	53380852	53381036	53381233	53380652	53380706	6	2.22578	0.0378905	0.100082	19	53380779	53380913	98	-0.403925	0.0124535	0.0394015	777	53380991	53381043	9	2.53216	0.00133111	0.00556426	37	53381231	53381370	47	-0.439484	0.135432	0.272312	202	ENSG00000185591	+	SP1	6305.53	0.510623
chr12	53501214	53501585	53501214	53501282	53501538	53501585	53501139	53501231	27	0.329634	0.465615	0.645506	87	53501144	53501344	529	-0.794636	2.43134e-18	4.95028e-17	4842	53501469	53501566	137	0.464935	0.016857	0.0509794	502	53501574	53501661	143	-1.58489	1.13832e-10	1.34043e-09	390	ENSG00000139546	+	TARBP2	1906.09	-0.578899
chr12	55927111	55928070	55927893	55928070	55927111	55927210	55928068	55928203	27	1.0054	0.00870191	0.0289525	130	55927724	55927902	2079	-0.382209	1.77579e-05	0.000108836	11659	55927191	55927365	55	0.639306	0.00135884	0.00566843	492	55927069	55927148	310	-0.322591	0.0166073	0.0503197	1359	ENSG00000170473	-	PYM1	1828.59	-0.289175
chr12	56158224	56160243	56158224	56158358	56160058	56160243	56158176	56158228	15	0.214845	0.762042	0.86766	32	56158353	56158411	171658	0.268464	0.00184545	0.00744627	215026	56160021	56160075	6	0.0583978	0.932346	0.965158	39	56160240	56160314	59	0.555369	0.0631837	0.151118	213	ENSG00000092841	+	MYL6	27555.6	0.150873
chr12	56160058	56160388	56160058	56160243	56160280	56160388	56160021	56160075	6	0.0583978	0.932346	0.965158	39	56160240	56160314	59	0.555369	0.0631837	0.151118	213	56160240	56160286	6	2.01326	0.0260571	0.0734769	25	56160388	56160436	7	-0.162071	0.901443	0.948854	10	ENSG00000092841	+	MYL6	27555.6	0.150873
chr12	56634994	56636449	56636342	56636449	56634994	56635115	56636448	56636494	9	-0.285804	0.753636	0.862499	21	56636295	56636380	362	-0.52039	2.46542e-05	0.000146907	1478	56635111	56635164	14	0.0224265	0.975361	0.986824	34	56634941	56635136	308	-0.0414352	0.774147	0.875493	1182	ENSG00000076108	-	BAZ2A	6327.66	0.0688528
chr12	56687830	56688566	56688223	56688566	56687830	56688058	56688552	56688629	44	-1.06453	4.64171e-05	0.000263545	304	56688049	56688366	9093	-0.747108	1.17949e-27	3.77543e-26	54249	56688052	56688113	6	0.746482	0.197734	0.360165	54	56687781	56687833	6	-3.08852	0.00215004	0.00852711	36	ENSG00000110958	-	PTGES3	7908.18	-0.535723
chr12	62602727	62603767	62602727	62602849	62603433	62603767	62602677	62602747	10	-0.800779	0.175043	0.329801	53	62602813	62602908	83	-1.09994	6.10117e-06	4.04906e-05	423	62603380	62603524	14	-0.648774	0.0582172	0.141774	178	62603768	62603819	9	-0.862307	0.536804	0.70757	10	ENSG00000257354	+	ENSG00000257354	117.511	1.38718
chr12	65169408	65170631	65169408	65169582	65170552	65170631	65169362	65169412	4	-0.17883	0.81086	0.897339	30	65169555	65169632	690	0.0273317	0.823199	0.904706	2303	65170506	65170556	5	2.49251	0.0335907	0.0906908	15	65170625	65170680	5	-0.668175	0.42323	0.608018	25	ENSG00000174106	+	LEMD3	1897.71	0.0877898
chr12	70243359	70243747	70243359	70243432	70243658	70243747	70243287	70243365	31	0.564072	0.0420876	0.109085	222	70243428	70243483	2171	0.0128832	0.900712	0.948485	5007	70243605	70243682	35	0.746993	0.0316477	0.0864083	146	70243741	70243802	20	-0.937372	0.0597304	0.144611	81	ENSG00000111596	+	CNOT2	2587.57	-0.0356489
chr12	71686037	71686530	71686037	71686092	71686306	71686530	71685980	71686044	11	-1.96288	0.00910324	0.0301147	43	71686069	71686253	358	-0.99273	6.17758e-11	7.45507e-10	990	71686257	71686311	4	1.54585	0.0413846	0.107633	29	71686367	71686590	81	-2.34031	9.29598e-20	2.0401e-18	451	ENSG00000139291	+	TMEM19	654.439	-1.61431
chr12	76030759	76031691	76031594	76031691	76030759	76031013	76031683	76031756	28	2.85413	6.04339e-11	7.29522e-10	122	76031542	76031602	7794	0.556768	1.39508e-08	1.3211e-07	11907	76031012	76031066	12	2.54528	0.000886015	0.00386123	38	76030688	76030786	166	0.250426	0.172217	0.32595	594	ENSG00000139289	-	PHLDA1	5047.07	0.855154
chr12	76764041	76764543	76764041	76764114	76764492	76764543	76763869	76764048	56	-0.0630558	0.813564	0.899015	285	76764013	76764172	75	0.30157	0.0357979	0.0955365	987	76764444	76764494	6	1.28096	0.202115	0.36587	17	76764543	76764595	3	-0.677534	0.533829	0.705055	15	ENSG00000186908	+	ZDHHC17	736.19	-0.757809
chr12	79689980	79690674	79690534	79690674	79689980	79690028	79690666	79690724	118	1.86792	9.36179e-21	2.1635e-19	581	79690490	79690569	1267	-0.195383	0.0186447	0.0555127	6038	79690022	79690081	11	1.36331	0.0834255	0.188151	29	79689905	79690008	68	0.324018	0.103992	0.223214	473	ENSG00000177425	-	PAWR	6917.68	0.273463
chr12	79690534	79691224	79690963	79691224	79690534	79690674	79691198	79691302	36	-0.458967	0.141928	0.282247	181	79690911	79691115	3235	0.524278	3.48449e-08	3.14941e-07	9495	79690666	79690724	118	1.86792	9.36179e-21	2.1635e-19	581	79690490	79690569	1267	-0.195383	0.0186447	0.0555127	6038	ENSG00000177425	-	PAWR	6917.68	0.273463
chr12	89352496	89353731	89353674	89353731	89352496	89352769	89353710	89353804	55	0.867993	0.00047763	0.00221413	282	89353606	89353707	257	1.22999	6.24322e-13	8.89112e-12	733	89352665	89352820	10	0.134755	0.788164	0.884058	67	89352356	89352507	40	2.3268	3.45794e-09	3.52746e-08	151	ENSG00000139318	-	DUSP6	111.446	1.51998
chr12	89524316	89524868	89524758	89524868	89524316	89524565	89524864	89524947	486	0.543747	0.000221169	0.00109601	908	89524705	89524796	490	0.111226	0.350122	0.535815	2534	89524560	89524619	9	0.434483	0.48237	0.661237	44	89524270	89524321	10	0.118246	0.903475	0.950106	18	ENSG00000257594	-	GALNT4	231.107	-0.0346306
chr12	89525429	89526002	89525999	89526002	89525429	89525611	89525989	89526054	31	-0.349584	0.37773	0.563966	110	89525949	89526034	325	-0.0823268	0.538553	0.708991	1356	89525486	89525747	178	-1.03	3.28937e-15	5.51071e-14	1598	89525377	89525547	177	-1.11532	1.61807e-12	2.23359e-11	890	ENSG00000139323	-	POC1B	1010.98	-0.560612
chr12	93570275	93571011	93570275	93570388	93570828	93571011	93570207	93570292	7	0.478056	0.359585	0.545126	60	93570335	93570440	225	1.13188	4.64204e-07	3.64364e-06	429	93570782	93570964	65	1.15446	1.09756e-07	9.33623e-07	379	93570926	93571099	182	0.204069	0.0997884	0.216189	1476	ENSG00000120833	+	SOCS2	1052.46	0.0825101
chr12	93570828	93571288	93570828	93571011	93571226	93571288	93570782	93570964	65	1.15446	1.09756e-07	9.33623e-07	379	93570926	93571099	182	0.204069	0.0997884	0.216189	1476	93571188	93571238	8	-0.211703	0.779364	0.878851	28	93571253	93571344	38	-0.169202	0.533167	0.70441	233	ENSG00000120833	+	SOCS2	1052.46	0.0825101
chr12	93571226	93571570	93571419	93571570	93571226	93571288	93571532	93571622	20	-0.674004	0.0561706	0.137824	150	93571370	93571436	203	-0.43979	0.0506951	0.126957	377	93571253	93571344	38	-0.169202	0.533167	0.70441	233	93571188	93571238	8	-0.211703	0.779364	0.878851	28	ENSG00000246985	-	SOCS2-AS1	145.88	0.202607
chr12	93571628	93571862	93571767	93571862	93571628	93571711	93571846	93571987	75	-0.9966	2.4358e-06	1.72139e-05	465	93571696	93571780	128	-0.0819582	0.722975	0.842813	340	93571679	93571758	11	-2.22256	0.000289783	0.00140288	72	93571503	93571636	4	-0.974355	0.113056	0.237868	50	ENSG00000246985	-	SOCS2-AS1	145.88	0.202607
chr12	103965706	103966207	103965706	103965844	103966121	103966207	103965656	103965736	97	-0.103526	0.672102	0.808469	286	103965806	103966053	2109	0.0650367	0.421763	0.606897	20102	103966073	103966147	11	0.755305	0.338984	0.524852	30	103966204	103966255	6	-0.703174	0.468248	0.647928	19	ENSG00000139372	+	TDG	2531.35	0.0613702
chr12	111597994	111599420	111599287	111599420	111597994	111598038	111599389	111599528	23	1.60941	1.40866e-07	1.18267e-06	208	111599247	111599323	413	0.183293	0.14381	0.285025	2029	111598039	111598116	7	0.196419	0.760347	0.866812	39	111597944	111597998	7	-0.829226	0.238946	0.41158	37	ENSG00000204842	-	ATXN2	1997.74	0.28038
chr12	121800021	121800681	121800576	121800681	121800021	121800027	121800676	121800743	9	-0.0507855	0.908434	0.952836	88	121800518	121800588	43	1.02947	0.00253441	0.00987413	156	121800023	121800078	29	1.1185	0.030653	0.0840917	63	121799970	121800120	18	1.56681	2.21631e-05	0.000133246	131	ENSG00000139725	-	RHOF	3040.61	0.872713
chr12	121803923	121804694	121803923	121804008	121804570	121804694	121803864	121803965	60	0.526977	0.0417638	0.108414	316	121803990	121804080	1221	0.421729	1.44151e-06	1.05351e-05	5589	121804525	121804577	5	0.223737	0.806737	0.894879	21	121804674	121804744	21	-0.317944	0.451277	0.632551	93	ENSG00000139718	+	SETD1B	5905.26	1.55573
chr12	121804570	121804802	121804570	121804694	121804705	121804802	121804525	121804577	5	0.223737	0.806737	0.894879	21	121804674	121804744	21	-0.317944	0.451277	0.632551	93	121804664	121804711	5	-0.634658	0.517828	0.692052	18	121804799	121804915	4	-0.386212	0.603499	0.757995	30	ENSG00000139718	+	SETD1B	5905.26	1.55573
chr12	122422054	122422699	122422598	122422699	122422054	122422249	122422673	122422746	22	3.16462	3.47771e-09	3.54677e-08	94	122422539	122422797	1103	1.96496	2.66468e-125	8.16163e-123	14098	122422164	122422254	10	1.76848	0.00202687	0.00809713	60	122422003	122422081	6	2.51631	7.10974e-05	0.000390684	53	ENSG00000130779	-	CLIP1	13574.6	2.17756
chr12	122980616	122980908	122980616	122980702	122980870	122980908	122980544	122980624	10	0.078869	0.881874	0.938583	62	122980672	122980760	3692	-0.142032	0.184781	0.342557	13999	122980822	122980889	73	0.821021	0.0109656	0.0352909	167	122980903	122981006	865	-0.652058	1.85186e-11	2.33654e-10	3741	ENSG00000182196	+	ARL6IP4	46.2397	-0.0790744
chr12	122980870	122981566	122980870	122980908	122981230	122981566	122980822	122980889	73	0.821021	0.0109656	0.0352909	167	122980903	122981006	865	-0.652058	1.85186e-11	2.33654e-10	3741	122981181	122981241	3	0.0546976	0.958546	0.978946	16	122981567	122981641	23	-0.165465	0.723076	0.842881	83	ENSG00000182196	+	ARL6IP4	46.2397	-0.0790744
chr12	122981666	122982013	122981666	122981810	122981821	122982013	122981615	122981673	14	-1.75179	0.00011008	0.000582262	110	122981702	122981862	77	-0.838378	7.30103e-05	0.000399871	468	122981760	122981824	9	0.166704	0.776669	0.877174	59	122982011	122982078	8	0.0288565	0.96133	0.980467	46	ENSG00000182196	+	ARL6IP4	46.2397	-0.0790744
chr12	123271196	123271945	123271814	123271945	123271196	123271272	123271929	123271986	3	-0.0858569	0.891292	0.943551	41	123271719	123271924	1555	-0.50559	1.20458e-09	1.28607e-08	10790	123271256	123271344	31	0.283354	0.361471	0.547103	170	123271149	123271222	18	-0.0893048	0.840122	0.915249	107	ENSG00000111328	-	CDK2AP1	3369.01	-0.34414
chr12	123972379	123972925	123972830	123972925	123972379	123972742	123972906	123972980	10	0.290597	0.548295	0.717024	80	123972535	123972850	2396	0.596506	7.31197e-11	8.76524e-10	6129	123972527	123972819	99	2.15529	4.86728e-31	1.81741e-29	689	123972330	123972390	38	0.463112	0.212393	0.379361	120	ENSG00000119242	-	CCDC92	1258.97	0.40325
chr12	124566601	124567598	124567590	124567598	124566601	124566704	124567591	124567651	4	-0.874185	0.362017	0.547723	20	124567531	124567618	1066	1.2133	1.2987e-34	5.51692e-33	4651	124566676	124566822	28	1.24155	0.000167431	0.000851162	160	124566543	124566638	199	1.8963	4.39991e-21	1.03176e-19	549	ENSG00000196498	-	NCOR2	10870.3	0.504344
chr12	124914090	124914704	124914649	124914704	124914090	124914198	124914702	124914849	23	6.35902	3.62231e-09	3.68623e-08	76	124914599	124914664	86523	0.681782	3.83287e-19	8.15749e-18	117954	124914181	124914281	42	3.81885	1.05051e-15	1.81644e-14	150	124914041	124914096	366	4.35807	2.52446e-48	1.63531e-46	523	ENSG00000150991	-	UBC	31117.5	0.357104
chr12	131828293	131830659	131828293	131828400	131830513	131830659	131828249	131828295	14	1.55088	0.0951545	0.208474	19	131828374	131828462	1546	-0.20969	0.027755	0.0774484	3687	131830443	131830518	152	0.970705	3.65041e-05	0.000211033	335	131830654	131830736	12	-0.971309	0.0685857	0.161201	68	ENSG00000198598	+	MMP17	913.686	-0.220985
chr13	19958504	19959026	19958504	19958859	19958886	19959026	19958369	19958552	103	-0.246136	0.134948	0.271606	707	19958714	19958921	413	0.192453	0.0381661	0.100709	4457	19958841	19958889	13	0.751154	0.451068	0.632374	16	19958991	19959076	296	-0.305988	0.0402053	0.105099	1127	ENSG00000121741	+	ZMYM2	4853.83	-0.119923
chr13	27450172	27450642	27450563	27450642	27450172	27450255	27450643	27450690	11	-0.285438	0.749464	0.859762	23	27450514	27450607	624	0.235505	0.0379851	0.100297	2402	27450238	27450327	66	0.910997	0.00143835	0.00596185	232	27449958	27450199	114	-0.356408	0.00325438	0.0123065	1591	ENSG00000122033	-	MTIF3	865.946	0.0487288
chr13	28138140	28139441	28138140	28138222	28139268	28139441	28138078	28138159	9	0.334368	0.452798	0.633944	96	28138189	28138261	194	0.766012	3.20625e-08	2.91256e-07	1115	28139009	28139342	146	0.089263	0.613485	0.765581	645	28139430	28139509	10	1.44211	0.00780776	0.0263709	58	ENSG00000152520	+	PAN3	2127.47	0.379711
chr13	30617775	30618935	30617775	30617919	30618810	30618935	30617721	30617776	9	2.61126	0.00271479	0.0104923	28	30617901	30618158	578	0.108651	0.333203	0.519123	3023	30618765	30618816	8	3.55672	0.000379556	0.00179312	30	30618935	30618982	12	2.50148	0.00585372	0.0205527	26	ENSG00000132952	+	USPL1	1222.27	-0.00466529
chr13	41061385	41061816	41061385	41061548	41061681	41061816	41061310	41061404	276	-1.34804	3.13998e-14	4.91012e-13	793	41061516	41061611	370	-1.13025	2.30939e-31	8.72716e-30	5442	41061606	41061768	60	1.87478	3.72599e-14	5.80396e-13	343	41061817	41061869	4	0.0184583	0.982249	0.990638	23	ENSG00000120688	+	WBP4	654.414	-0.875303
chr13	50124453	50125681	50125540	50125681	50124453	50124693	50125665	50125733	19	1.07501	0.0167335	0.0506456	83	50125492	50125554	1765	1.08686	6.67922e-31	2.47647e-29	3025	50124690	50124753	19	0.329765	0.415474	0.601444	111	50124396	50124478	105	1.57959	2.95203e-09	3.03334e-08	250	ENSG00000231607	-	DLEU2	299.732	-0.311049
chr13	60397174	60397578	60397174	60397222	60397456	60397578	60397129	60397184	23	0.480666	0.442556	0.624724	41	60397201	60397275	213	-0.33777	0.0253481	0.0718543	894	60397420	60397477	9	-0.344297	0.62855	0.777082	40	60397561	60397641	17	0.975852	0.0543074	0.134167	72	ENSG00000083544	+	TDRD3	366.82	-0.547726
chr13	79405828	79406308	79406232	79406308	79405828	79405900	79406286	79406380	17	-0.109563	0.748644	0.859182	148	79406152	79406261	177	-0.767389	1.14509e-07	9.72092e-07	1224	79405883	79405948	43	1.33316	0.00277817	0.0107054	86	79405751	79405837	27	-2.03568	4.43544e-10	4.94337e-09	232	ENSG00000139746	-	RBM26	1399.25	-0.568172
chr13	110713488	110715561	110713488	110713695	110715352	110715561	110713443	110713495	21	-0.193785	0.65603	0.797122	97	110713656	110713765	447	-0.513439	2.1578e-05	0.000130025	1908	110715306	110715357	38	1.63158	0.0021846	0.00864593	64	110715550	110715613	20	1.03988	0.106278	0.226968	38	ENSG00000153487	+	ING1	775.391	0.0775215
chr13	113209471	113210137	113209471	113209612	113209995	113210137	113209418	113209478	22	1.50088	0.000322903	0.00154771	104	113209511	113209670	1873	-0.479642	5.38927e-08	4.75443e-07	6540	113209946	113210099	9	1.04221	0.0746493	0.172486	53	113210136	113210185	13	-0.373205	0.664895	0.8037	22	ENSG00000139842	+	CUL4A	2595.88	-0.440516
chr13	114281502	114281995	114281502	114281610	114281813	114281995	114281457	114281533	9	-0.182341	0.695624	0.824677	78	114281582	114281663	538	0.553101	2.11373e-08	1.95928e-07	2704	114281754	114281832	22	3.21014	2.13421e-10	2.44866e-09	104	114281895	114282048	242	0.0415152	0.798869	0.890375	702	ENSG00000169062	+	UPF3A	1107.42	0.172531
chr14	20413204	20413557	20413500	20413557	20413204	20413214	20413555	20413610	9	1.14326	0.0464899	0.118355	56	20413373	20413504	174	1.62794	2.09757e-28	6.97562e-27	1110	20413188	20413254	7	0.234562	0.686696	0.818731	49	20413152	20413207	5	0.0375871	0.970719	0.984851	16	ENSG00000129566	-	TEP1	2688.32	1.40589
chr14	21097359	21098835	21098654	21098835	21097359	21097384	21098817	21098886	79	3.89897	6.04259e-30	2.13107e-28	305	21098524	21098748	283	2.61451	3.39328e-75	4.28781e-73	2218	21097383	21097468	6	6.19112	3.99495e-08	3.58511e-07	40	21097317	21097363	6	4.87111	4.48454e-05	0.00025541	28	ENSG00000165804	-	ZNF219	4110.01	2.33288
chr14	22871652	22872162	22871652	22871785	22872092	22872162	22871604	22871653	6	-1.56692	0.281054	0.461165	10	22871756	22871929	4321	1.53086	4.13534e-94	7.26788e-92	28007	22872044	22872099	6	1.96315	0.0091708	0.0303062	32	22872136	22872237	122	0.0764267	0.661429	0.801286	619	ENSG00000197324	+	LRP10	22892.4	1.42373
chr14	22872092	22872783	22872092	22872162	22872608	22872783	22872044	22872099	6	1.96315	0.0091708	0.0303062	32	22872136	22872237	122	0.0764267	0.661429	0.801286	619	22872549	22872694	16	-0.158188	0.660129	0.8002	135	22872781	22872847	7	0.810166	0.205887	0.370964	40	ENSG00000197324	+	LRP10	22892.4	1.42373
chr14	23301212	23301788	23301573	23301788	23301212	23301401	23301785	23301836	8	1.82301	0.0286657	0.0795746	26	23301462	23301718	48	0.872156	7.10773e-07	5.43125e-06	801	23301387	23301452	28	0.225209	0.569372	0.732535	107	23301132	23301254	9	-1.53094	0.00184246	0.00743633	92	ENSG00000235194	-	PPP1R3E	584.735	-0.547742
chr14	23321198	23322005	23321198	23321456	23321877	23322005	23321152	23321205	11	3.32752	0.00707841	0.0242564	17	23321442	23321512	13282	0.160963	0.0652994	0.155086	44611	23321717	23321908	23	0.386775	0.251173	0.427235	152	23321927	23322098	81	-2.28078	8.36076e-28	2.69765e-26	708	ENSG00000100836	+	PABPN1	3020.92	0.0836692
chr14	23567060	23567568	23567508	23567568	23567060	23567172	23567565	23567621	7	-0.189487	0.758613	0.865872	43	23567445	23567526	60	-1.37742	8.14973e-06	5.29104e-05	263	23567172	23567221	9	0.689837	0.257361	0.434621	49	23567010	23567062	4	-0.616663	0.610942	0.763777	12	ENSG00000213983	-	AP1G2	4785.39	-0.193147
chr14	24114411	24115325	24114411	24114811	24115019	24115325	24114361	24114434	4	-0.251592	0.668763	0.806335	52	24114783	24114883	1167	-0.168608	0.0673969	0.159001	6290	24114877	24115027	61	-0.086012	0.69605	0.824893	388	24115201	24115376	267	-0.172372	0.231522	0.40269	986	ENSG00000100897	+	DCAF11	3899.15	-0.182737
chr14	24242296	24242740	24242622	24242740	24242296	24242400	24242738	24242806	20	0.172221	0.696001	0.82487	88	24242559	24242656	264	0.283419	0.00886471	0.0294235	2216	24242387	24242469	75	1.71178	1.4589e-11	1.86078e-10	296	24242224	24242375	81	-0.509357	0.00188398	0.00758402	731	ENSG00000092330	-	TINF2	1893.79	0.137678
chr14	24271188	24271894	24271594	24271894	24271188	24271219	24271895	24271943	17	1.51979	0.0621801	0.149242	25	24271413	24271610	1171	2.11998	1.03918e-101	2.10668e-99	5128	24271193	24271297	246	2.22292	1.2266e-72	1.4543e-70	1764	24271137	24271196	5	1.07484	0.12967	0.263504	33	ENSG00000100949	-	RABGGTA	3149.11	1.72208
chr14	24429829	24432010	24429829	24429953	24431854	24432010	24429816	24429884	7	0.978765	0.0394705	0.103574	72	24429934	24430141	4276	1.42153	1.58441e-70	1.79784e-68	11314	24431792	24431861	17	3.9697	1.15947e-07	9.83415e-07	64	24431895	24432057	20	1.46848	0.00052048	0.00239335	95	ENSG00000100441	+	KHNYN	8340.88	1.63645
chr14	24442280	24443009	24442740	24443009	24442280	24442393	24442955	24443120	102	0.22857	0.186114	0.344274	625	24442664	24442765	208	-0.140298	0.278948	0.458871	1727	24442375	24442448	4	0.400292	0.511349	0.686553	46	24442209	24442319	76	-0.770103	0.000361004	0.0017117	505	ENSG00000100445	-	SDR39U1	1201.68	-0.31596
chr14	31207482	31207913	31207792	31207913	31207482	31207564	31207892	31207963	12	-0.0590245	0.868827	0.931222	136	31207634	31207818	765	-0.0766457	0.388905	0.575558	9086	31207565	31207614	7	3.76628	0.00191114	0.00768018	23	31207454	31207546	124	1.36201	1.09321e-26	3.36302e-25	1499	ENSG00000092148	-	HECTD1	11696.6	0.251069
chr14	35122520	35123198	35122520	35122551	35122881	35123198	35122388	35122547	193	0.246749	0.0826173	0.186727	1002	35122537	35122755	504	-1.47258	3.15913e-36	1.41452e-34	2500	35122817	35122907	22	-0.196904	0.589057	0.747184	127	35123198	35123247	7	-0.837434	0.417742	0.603436	17	ENSG00000100890	+	PRORP	274.186	-0.521179
chr14	35404075	35404907	35404748	35404907	35404075	35404083	35404873	35404957	14	1.60503	0.00809642	0.0272143	49	35404626	35404759	5537	0.651786	1.3182e-16	2.4157e-15	16699	35404073	35404137	108	2.37774	2.6943e-18	5.46987e-17	347	35404003	35404079	9	1.47381	0.00730919	0.024927	59	ENSG00000100906	-	NFKBIA	4456.32	0.663632
chr14	37594293	37595120	37595112	37595120	37594293	37594436	37594994	37595171	56	3.1386	2.6665e-21	6.33189e-20	245	37595046	37595131	504	0.872836	5.53054e-20	1.22969e-18	4745	37594415	37594489	48	1.52626	1.44197e-05	8.98755e-05	154	37594172	37594308	93	1.54058	9.92162e-12	1.28188e-10	392	ENSG00000129514	-	FOXA1	22532.1	0.811982
chr14	37595112	37595388	37595237	37595388	37595112	37595120	37595236	37595432	38	1.69173	6.09493e-13	8.69165e-12	385	37595185	37595362	21357	0.605649	3.6742e-11	4.51982e-10	62470	37594994	37595171	56	3.1386	2.6665e-21	6.33189e-20	245	37595046	37595131	504	0.872836	5.53054e-20	1.22969e-18	4745	ENSG00000129514	-	FOXA1	22532.1	0.811982
chr14	39174905	39176073	39174905	39175256	39175870	39176073	39174852	39175013	13	-1.13124	0.0257199	0.0727275	74	39175245	39175308	2277	0.765347	2.56792e-20	5.80899e-19	10551	39175801	39175888	12	-1.64968	0.00203538	0.00812729	83	39176074	39176120	22	0.921853	0.237737	0.410049	27	ENSG00000100941	+	PNN	14258.3	0.654273
chr14	49892899	49893505	49892899	49893095	49893456	49893505	49892851	49892944	34	-0.075514	0.820866	0.903387	195	49892986	49893159	4495	-0.100875	0.287586	0.468737	20222	49893373	49893553	51	1.19959	5.45266e-07	4.23819e-06	300	49893476	49893571	144	1.17191	1.20566e-14	1.94395e-13	823	ENSG00000165527	+	ARF6	9348.15	-0.112685
chr14	61321645	61322684	61321645	61321771	61322576	61322684	61321584	61321648	20	0.899536	0.0656923	0.155804	69	61321744	61321842	97	1.09491	2.60865e-13	3.81795e-12	1242	61322565	61322617	6	0.322533	0.582908	0.7426	47	61322679	61322737	4	0.866794	0.34116	0.526956	19	ENSG00000027075	+	PRKCH	1805.04	0.97799
chr14	63641491	63642060	63641870	63642060	63641491	63641579	63642050	63642202	82	0.546314	0.0203105	0.059615	305	63641718	63641877	296	0.134633	0.261816	0.43972	1516	63641578	63641656	10	1.03286	0.0409574	0.106679	64	63641444	63641495	55	0.178719	0.707425	0.83255	95	ENSG00000140006	-	WDR89	1321.76	-0.0774823
chr14	64504588	64505342	64504588	64504725	64505203	64505342	64504536	64504772	50	0.693878	0.00298219	0.011395	350	64504674	64504844	742	-0.413296	2.44997e-05	0.000146048	4869	64505141	64505240	97	0.540589	0.0059309	0.020791	497	64505341	64505391	5	-1.50009	0.110545	0.233795	24	ENSG00000126804	+	ZBTB1	2560.34	0.190867
chr14	66507854	66508503	66507854	66508158	66508420	66508503	66507786	66507867	51	1.10954	2.49526e-05	0.00014857	242	66508136	66508210	294	-0.422749	0.00026002	0.00127036	1839	66508371	66508433	5	1.76973	0.00526293	0.0187174	43	66508479	66508565	67	0.418771	0.101288	0.218576	266	ENSG00000171723	+	GPHN	974.978	-0.215605
chr14	68793410	68794789	68794601	68794789	68793410	68793505	68794766	68794839	14	3.27374	0.000262729	0.00128256	33	68794529	68794628	54	3.67965	2.59482e-18	5.27423e-17	192	68793492	68793678	27	0.706997	0.00612516	0.0213727	287	68793248	68793441	51	0.275854	0.343305	0.529063	207	ENSG00000185650	-	ZFP36L1	9348.26	1.54875
chr14	68978268	68978861	68978748	68978861	68978268	68978394	68978860	68978915	6	-0.921205	0.318209	0.503795	21	68978687	68978779	77	-0.312573	0.161586	0.311093	376	68978389	68978438	6	0.183606	0.819606	0.902591	24	68978221	68978272	8	-0.0182063	0.981041	0.990071	28	ENSG00000072110	-	ACTN1	14039.5	0.114057
chr14	69767037	69767782	69767037	69767141	69767684	69767782	69766965	69767074	53	0.948216	0.000143657	0.000741539	314	69767135	69767194	30198	0.741518	4.35351e-23	1.13449e-21	56882	69767636	69767707	21	0.765828	0.0724217	0.168369	92	69767758	69768053	108	2.00462	3.2773e-29	1.12576e-27	667	ENSG00000100650	+	SRSF5	13518.6	0.868253
chr14	69767684	69768205	69767684	69767782	69767839	69768205	69767636	69767707	21	0.765828	0.0724217	0.168369	92	69767758	69768053	108	2.00462	3.2773e-29	1.12576e-27	667	69767793	69767845	15	3.6855	0.000265594	0.00129535	32	69768157	69768252	52	0.997691	4.77109e-06	3.22019e-05	382	ENSG00000100650	+	SRSF5	13518.6	0.868253
chr14	73759381	73760411	73760266	73760411	73759381	73759495	73760409	73760460	10	0.85825	0.16718	0.319095	44	73760216	73760309	214	0.0993357	0.423291	0.608043	1488	73759466	73759544	16	1.33998	0.0198181	0.0584027	56	73759307	73759408	29	0.378884	0.159586	0.30829	232	ENSG00000156030	-	MIDEAS	6035.51	0.410886
chr14	73785622	73787349	73787207	73787349	73785622	73785775	73787340	73787401	44	0.563793	0.200667	0.363876	110	73787125	73787293	171	-0.0476315	0.712756	0.83625	1287	73785763	73785847	26	1.20086	0.00473391	0.0170669	95	73785556	73785653	29	1.01439	0.0140491	0.0437075	102	ENSG00000156030	-	MIDEAS	6035.51	0.410886
chr14	77320882	77321497	77320882	77321035	77321254	77321497	77320738	77320898	57	-1.78932	3.07216e-24	8.46782e-23	810	77321029	77321089	2454	0.147799	0.0810375	0.183938	9739	77321176	77321332	37	1.63957	4.73904e-12	6.29806e-11	351	77321494	77321544	10	-2.41985	0.030137	0.0829343	24	ENSG00000100577	+	GSTZ1	2394.57	0.276501
chr14	81219343	81221071	81220872	81221071	81219343	81219498	81221037	81221222	85	1.4041	4.05606e-16	7.17329e-15	755	81220820	81220974	2650	-0.749776	6.54723e-21	1.52515e-19	9400	81219494	81219551	243	-0.527138	0.00102983	0.00442276	971	81219295	81219344	14	-0.16241	0.810137	0.896909	39	ENSG00000165417	-	GTF2A1	2792.29	-0.178225
chr14	88562932	88563566	88562932	88563030	88563444	88563566	88562889	88562935	5	-1.09081	0.151682	0.296633	35	88563002	88563113	548	-0.279708	0.000748714	0.00331709	9619	88563393	88563464	17	-0.794326	0.0424798	0.109892	119	88563564	88563617	11	-1.53657	0.0527909	0.131203	35	ENSG00000100722	+	ZC3H14	4375.97	-0.30093
chr14	92039220	92040191	92040036	92040191	92039220	92039572	92040152	92040244	79	0.113436	0.555797	0.722388	473	92039987	92040075	847	0.0989258	0.28481	0.465457	3500	92039548	92039633	37	-1.34766	7.06663e-06	4.64096e-05	231	92039173	92039222	10	-0.868162	0.484153	0.662604	13	ENSG00000100815	-	TRIP11	4041.15	0.0848681
chr14	100019299	100019607	100019299	100019381	100019502	100019607	100019224	100019397	227	0.235955	0.131093	0.265636	889	100019377	100019547	528	-1.03596	3.08154e-18	6.23804e-17	2129	100019454	100019519	27	-0.0856521	0.856434	0.924635	76	100019599	100019697	32	-1.45007	2.49844e-09	2.58549e-08	402	ENSG00000196405	+	EVL	14911.3	-0.372694
chr14	100019502	100020447	100019502	100019607	100020308	100020447	100019454	100019519	27	-0.0856521	0.856434	0.924635	76	100019599	100019697	32	-1.45007	2.49844e-09	2.58549e-08	402	100020260	100020314	10	-3.70908	7.95354e-06	5.17399e-05	73	100020448	100020475	5	-2.96819	0.014277	0.0443021	23	ENSG00000196405	+	EVL	14911.3	-0.372694
chr14	100238620	100239143	100238620	100238888	100239048	100239143	100238465	100238631	251	0.741412	1.66344e-08	1.5602e-07	1665	100238785	100239067	946	0.575312	6.44783e-08	5.63675e-07	7009	100239001	100239074	20	0.999827	0.012586	0.0397701	102	100239131	100239304	514	0.286054	0.00215554	0.00854743	3686	ENSG00000100811	+	YY1	9958.61	0.518614
chr14	100239048	100240673	100239048	100239143	100240508	100240673	100239001	100239074	20	0.999827	0.012586	0.0397701	102	100239131	100239304	514	0.286054	0.00215554	0.00854743	3686	100240441	100240586	20	0.664446	0.0800221	0.182112	116	100240604	100240724	4	0.179531	0.818308	0.901805	26	ENSG00000100811	+	YY1	9958.61	0.518614
chr14	103333925	103334898	103333925	103334236	103334642	103334898	103333844	103333996	132	0.951097	1.01936e-08	9.8281e-08	801	103334177	103334370	2058	-0.365872	0.000120049	0.000630066	9704	103334592	103334663	14	-0.097052	0.874321	0.934367	43	103334885	103334949	12	2.61546	2.21151e-05	0.000132996	56	ENSG00000100664	+	EIF5	16198.1	0.0746367
chr14	103521498	103521687	103521686	103521687	103521498	103521565	103521680	103521734	4	0.565655	0.391317	0.578027	40	103521630	103521728	331	-0.252359	0.0439031	0.11297	1651	103521552	103521612	4	1.42989	0.0889435	0.197702	25	103521351	103521511	58	-0.833981	0.000171984	0.000872025	427	ENSG00000166165	-	CKB	1176.02	0.201984
chr14	104865156	104865950	104865156	104865267	104865823	104865950	104865083	104865177	64	-0.331325	0.191696	0.351993	294	104865256	104865493	2225	1.62459	1.82663e-72	2.15364e-70	9378	104865776	104865827	14	0.780186	0.306797	0.490997	28	104865919	104865974	7	2.48829	8.72457e-05	0.00047067	53	ENSG00000099814	+	CEP170B	15121.3	1.56066
chr14	105167875	105168909	105168727	105168909	105167875	105167974	105168910	105168956	13	1.94396	0.0875904	0.195463	16	105168676	105168749	699	0.0481283	0.750879	0.860625	2038	105167971	105168026	11	-0.604111	0.408698	0.59511	36	105167797	105167886	21	0.942704	0.00462511	0.0167196	156	ENSG00000184916	-	JAG2	4005.47	0.00307276
chr14	105489538	105490174	105489538	105489827	105489995	105490174	105489489	105489540	6	0.34352	0.699036	0.826902	22	105489813	105489903	69	0.237083	0.321266	0.506945	354	105489943	105490100	23	-0.565588	0.187564	0.346215	104	105489957	105490357	47	-0.869134	2.37789e-06	1.68415e-05	634	ENSG00000185347	+	TEDC1	4329.74	0.000463117
chr14	105489995	105490998	105489995	105490174	105490741	105490998	105489943	105490100	23	-0.565588	0.187564	0.346215	104	105489957	105490357	47	-0.869134	2.37789e-06	1.68415e-05	634	105490609	105490843	32	0.795728	0.00136196	0.00568032	312	105490994	105491048	39	1.34578	0.000263031	0.00128396	128	ENSG00000185347	+	TEDC1	4329.74	0.000463117
chr15	29821478	29822224	29822114	29822224	29821478	29821580	29822223	29822273	89	0.607956	0.0719082	0.167392	146	29822073	29822129	749	0.275926	0.0188594	0.0560584	2551	29821578	29821627	6	1.53826	0.110685	0.234044	19	29821433	29821492	10	1.8242	0.00610651	0.0213173	41	ENSG00000104067	-	TJP1	5593.53	0.22375
chr15	33066827	33068118	33067940	33068118	33066827	33066907	33068113	33068168	7	-1.0524	0.208907	0.374966	26	33067796	33068052	162	0.43449	0.00247534	0.00966493	944	33066883	33066976	29	-0.676184	0.0160238	0.0488405	242	33066751	33066834	112	0.564258	0.00262728	0.010196	511	ENSG00000248905	-	FMN1	1745.34	0.537319
chr15	35545966	35546235	35546164	35546235	35545966	35546039	35546231	35546306	9	-0.190142	0.733595	0.84929	53	35546113	35546239	296	-0.640086	8.12307e-05	0.000440837	909	35546003	35546088	20	1.47157	0.00334434	0.0125977	78	35545918	35545967	4	-1.35503	0.15332	0.299015	22	ENSG00000134146	-	DPH6	236.676	-0.739411
chr15	40807051	40807693	40807472	40807693	40807051	40807088	40807662	40807841	116	-0.955942	4.76785e-11	5.8077e-10	1356	40807405	40807481	760	-1.36022	1.23473e-39	6.17996e-38	2873	40807053	40807167	79	0.043625	0.853094	0.922804	337	40807006	40807056	40	-1.57968	0.015709	0.0480211	49	ENSG00000104129	-	DNAJC17	299.867	-1.34037
chr15	40843933	40844476	40843933	40844047	40844392	40844476	40843886	40843962	4	1.09611	0.024822	0.0705708	73	40844034	40844129	4494	1.56152	2.3016e-69	2.53344e-67	7487	40844207	40844423	627	-0.410421	1.67476e-06	1.21286e-05	7999	40844459	40844594	463	-0.54354	2.66072e-07	2.15674e-06	2888	ENSG00000166145	+	SPINT1	7397.26	0.987183
chr15	52019105	52019731	52019105	52019228	52019507	52019731	52019045	52019122	37	-0.503031	0.135918	0.273089	153	52019203	52019298	1426	0.495018	4.32485e-08	3.86394e-07	12563	52019461	52019533	9	1.81795	0.00201926	0.00806938	52	52019494	52019809	51	2.31822	6.0793e-24	1.65194e-22	398	ENSG00000069956	+	MAPK6	9336.71	0.582843
chr15	52019507	52019942	52019507	52019731	52019860	52019942	52019461	52019533	9	1.81795	0.00201926	0.00806938	52	52019494	52019809	51	2.31822	6.0793e-24	1.65194e-22	398	52019602	52019884	14	2.0532	9.00175e-15	1.46369e-13	281	52019922	52020004	35	2.03332	7.90254e-07	5.99039e-06	110	ENSG00000069956	+	MAPK6	9336.71	0.582843
chr15	55318897	55319231	55319122	55319231	55318897	55318938	55319199	55319282	69	-1.9376	1.7449e-11	2.20485e-10	336	55319017	55319169	263	-0.237003	0.0502425	0.126059	1788	55318935	55319059	55	-0.646086	0.016293	0.049494	277	55318836	55318906	10	-2.42969	0.000516376	0.00237577	57	ENSG00000069974	-	RAB27A	335.792	-1.34703
chr15	56243442	56243942	56243878	56243942	56243442	56243459	56243933	56243984	5	-0.572869	0.425814	0.61004	33	56243605	56243910	310	1.09276	5.4876e-22	1.34815e-20	2787	56243448	56243511	38	1.18575	0.00187363	0.00754881	115	56243396	56243444	19	0.490046	0.529088	0.700973	27	ENSG00000181827	-	RFX7	1531.12	1.1487
chr15	63121775	63122655	63121775	63121862	63122407	63122655	63121723	63121781	5	3.65662	0.000354749	0.0016844	32	63121823	63121887	487	-0.151858	0.131029	0.265532	4120	63122362	63122411	13	-0.417346	0.645481	0.789719	22	63122602	63122663	4	-0.38489	0.478213	0.657273	61	ENSG00000103642	+	LACTB	1513.74	-0.144535
chr15	72230378	72231317	72231189	72231317	72230378	72230468	72231312	72231387	23	4.55566	2.97617e-10	3.37076e-09	93	72231138	72231217	18471	0.110802	0.214396	0.381887	36076	72230461	72230640	44	0.943307	0.000183577	0.000925781	321	72230333	72230386	6	0.446886	0.434007	0.617538	51	ENSG00000067225	-	PKM	67891.4	0.126226
chr15	73926469	73927808	73927694	73927808	73926469	73926638	73927782	73927880	108	-0.965256	3.8668e-10	4.33648e-09	994	73927644	73927966	728	0.429256	1.61369e-05	9.96237e-05	3792	73926619	73926710	717	0.436219	7.20401e-07	5.50084e-06	4339	73926416	73926553	241	0.533531	0.000427534	0.00200089	902	ENSG00000261801	-	LOXL1-AS1	1659.45	0.285556
chr15	74842675	74843307	74843137	74843307	74842675	74842801	74843305	74843361	6	-1.38372	0.11962	0.248281	27	74843077	74843174	373	-0.881421	1.85659e-18	3.79745e-17	3501	74842785	74842848	11	-0.745408	0.236692	0.408839	51	74842624	74842676	10	-3.11326	0.00176562	0.00716282	37	ENSG00000140474	-	ULK3	1892.02	-0.863218
chr15	78540354	78540676	78540354	78540443	78540659	78540676	78540289	78540378	18	-1.39366	0.00590091	0.020697	84	78540415	78540511	8175	-0.412548	1.86216e-06	1.33746e-05	32604	78540613	78540666	8	0.885756	0.388096	0.574733	17	78540656	78540838	12	-0.630793	0.0826342	0.18676	131	ENSG00000041357	+	PSMA4	12697.2	-0.372321
chr15	79896709	79897121	79897001	79897121	79896709	79896758	79897103	79897174	13	-0.0365191	0.943893	0.971552	67	79896943	79897027	1702	-1.19135	5.11826e-39	2.51556e-37	11407	79896752	79896813	8	-1.67573	0.0240908	0.0688647	41	79896656	79896713	15	-1.46191	0.0196235	0.057917	51	ENSG00000136371	-	MTHFS	256.357	-0.858249
chr15	79923091	79923929	79923755	79923929	79923091	79923172	79923904	79923999	25	0.128857	0.678426	0.812896	183	79923604	79923764	1629	-0.402035	1.2409e-06	9.16561e-06	12350	79923149	79923340	189	0.326394	0.0265362	0.074604	1062	79923032	79923209	29	2.36099	1.89701e-20	4.32369e-19	331	ENSG00000259332	-	ST20-MTHFS	29.4576	0.301637
chr15	80695164	80695784	80695164	80695329	80695717	80695784	80695119	80695174	11	0.405184	0.559293	0.724993	34	80695271	80695424	244	0.41634	0.000221678	0.00109814	2036	80695672	80695721	23	1.12032	0.0769005	0.176553	40	80695751	80695826	5	0.599151	0.292721	0.474531	51	ENSG00000136379	+	ABHD17C	1916.16	0.145374
chr15	83207069	83207937	83207822	83207937	83207069	83207108	83207904	83207995	10	0.263968	0.526198	0.698538	98	83207365	83207856	2169	-0.144601	0.120283	0.249363	12055	83207106	83207158	8	1.92334	0.0110202	0.0354369	31	83207001	83207084	75	0.584886	0.00666011	0.0229982	454	ENSG00000166503	-	HDGFL3	5650.64	-0.178032
chr15	84748457	84748909	84748457	84748591	84748832	84748909	84748150	84748482	35	0.262271	0.175392	0.330259	540	84748568	84748666	1305	0.133325	0.147978	0.291182	4081	84748786	84748833	9	0.710781	0.283413	0.463742	36	84748909	84748990	4	0.604393	0.403249	0.590102	32	ENSG00000166716	+	ZNF592	3531.78	0.34088
chr15	84981211	84981878	84981211	84981442	84981810	84981878	84981140	84981215	35	1.88043	4.83443e-07	3.78305e-06	132	84981291	84981491	175	-0.329057	0.0246078	0.0700726	1329	84981761	84981811	7	0.649835	0.322945	0.50872	39	84981839	84981932	104	-0.148973	0.290123	0.471596	987	ENSG00000073417	+	PDE8A	3789.44	-0.182771
chr15	90233432	90234237	90233940	90234237	90233432	90233569	90234217	90234310	52	-0.678757	0.00420562	0.0154041	369	90233863	90233972	6368	0.150582	0.0746869	0.17255	59299	90233563	90233617	6	0.0593625	0.946099	0.972489	24	90233385	90233438	8	1.16164	0.18079	0.337261	24	ENSG00000185043	-	CIB1	5912.93	0.104775
chr15	90902612	90903301	90902612	90902754	90903242	90903301	90902560	90902620	6	0.0986295	0.882181	0.938737	36	90902607	90902817	798	-0.207881	0.0309153	0.0846918	3542	90903134	90903337	12	0.365116	0.377841	0.564022	93	90903292	90903348	10	-1.98505	0.0225747	0.0651623	31	ENSG00000196547	+	MAN2A2	3936.21	-0.357304
chr15	96330400	96331020	96330400	96330701	96331000	96331020	96330349	96330401	5	0.13809	0.857648	0.925311	27	96330664	96330962	1694	0.300719	0.000880653	0.0038404	16838	96330926	96331005	82	1.71682	2.83077e-11	3.5145e-10	327	96331014	96331074	344	0.420567	0.000140572	0.000727169	1995	ENSG00000185551	+	NR2F2	19638.9	0.252702
chr15	98648287	98649625	98648287	98648538	98649253	98649625	98648240	98648320	17	-0.106082	0.838011	0.913966	61	98648394	98648709	2735	0.497543	2.1266e-06	1.51657e-05	10722	98649208	98649340	8	1.41561	0.0425014	0.109928	36	98649625	98649675	49	0.62463	0.158333	0.306408	84	ENSG00000140443	+	IGF1R	33779	1.01644
chr15	98649253	98649743	98649253	98649625	98649684	98649743	98649208	98649340	8	1.41561	0.0425014	0.109928	36	98649625	98649675	49	0.62463	0.158333	0.306408	84	98649654	98649721	21	0.693215	0.0562875	0.138042	124	98649738	98649913	18	1.33528	0.000221778	0.00109857	138	ENSG00000140443	+	IGF1R	33779	1.01644
chr15	98899718	98901720	98899718	98899743	98901584	98901720	98899579	98899785	10	1.02569	0.0176919	0.0531242	93	98899739	98900092	394	2.25482	4.09507e-116	1.07177e-113	4266	98901538	98901594	36	2.0441	9.29442e-06	5.97273e-05	94	98901601	98901791	42	1.79066	3.08581e-16	5.51039e-15	405	ENSG00000140443	+	IGF1R	33779	1.01644
chr15	101251655	101252115	101251945	101252115	101251655	101251772	101252096	101252144	13	-0.947693	0.163654	0.313983	40	101251893	101252049	600	-0.588697	1.33614e-05	8.37239e-05	1733	101251763	101251820	4	1.02581	0.220189	0.388773	23	101251598	101251669	61	0.447697	0.125683	0.257445	220	ENSG00000131873	-	CHSY1	1815.57	-0.621398
chr15	101489063	101489860	101489706	101489860	101489063	101489460	101489808	101489899	18	-1.69314	8.42353e-05	0.000455709	123	101489658	101489821	3215	-0.115207	0.300607	0.483635	4848	101489458	101489566	35	-0.393497	0.218659	0.387039	194	101489043	101489065	7	-1.071	0.339348	0.525203	15	ENSG00000140479	-	PCSK6	1705.43	-0.376929
chr16	71575	72764	72628	72764	71575	71644	72741	72847	58	-0.445735	0.0161648	0.0491674	566	72576	72647	2633	1.05544	6.38384e-43	3.55276e-41	9751	71641	71785	128	1.59877	3.37458e-25	9.6933e-24	926	71519	71582	13	0.72896	0.127949	0.260934	74	ENSG00000007384	-	RHBDF1	4662.87	0.937875
chr16	680340	682169	680340	680409	682125	682169	680270	680343	6	-0.247706	0.615304	0.767097	67	680386	680482	6095	0.00446518	0.959928	0.979701	27176	682089	682136	6	-0.176189	0.864103	0.928333	15	682161	682244	47	-0.043929	0.893912	0.944765	183	ENSG00000103266	+	STUB1	6518.55	-0.0509406
chr16	683731	684266	684139	684266	683731	683804	684264	684319	10	3.62374	2.89165e-05	0.000170205	42	684069	684152	72	-0.181956	0.209589	0.37584	976	683734	683877	12	0.284842	0.556408	0.722838	76	683461	683759	5	0.70552	0.0977701	0.212859	91	ENSG00000161999	-	JMJD8	2610.88	-0.141372
chr16	684139	684498	684331	684498	684139	684266	684434	684646	86	3.12647	1.08894e-47	6.97911e-46	732	684273	684359	1843	0.00799175	0.927946	0.96335	10779	684264	684319	10	3.62374	2.89165e-05	0.000170205	42	684069	684152	72	-0.181956	0.209589	0.37584	976	ENSG00000161999	-	JMJD8	2610.88	-0.141372
chr16	721077	721569	721077	721181	721400	721569	721003	721106	42	-0.449796	0.131364	0.266089	212	721150	721229	518	-0.519815	6.98346e-06	4.58884e-05	4091	721332	721432	32	0.0509287	0.863973	0.928277	238	721556	721685	256	-0.813924	2.29378e-07	1.87585e-06	986	ENSG00000103254	+	ANTKMT	1301.52	-0.254359
chr16	726933	728513	728329	728513	726933	727105	728472	728587	162	-2.04606	8.68234e-28	2.79928e-26	1035	728302	728401	172	-1.21387	4.68723e-16	8.27049e-15	1140	726997	727178	118	-1.99606	2.14225e-14	3.39515e-13	383	726924	727004	11	-1.38463	0.0116559	0.0371955	67	ENSG00000162004	-	CCDC78	752.265	-1.57735
chr16	1378978	1379804	1379651	1379804	1378978	1379169	1379805	1379853	6	-0.897662	0.334096	0.519997	24	1379590	1379681	1456	0.942048	3.30456e-26	9.94143e-25	4752	1379169	1379216	18	2.85644	0.00251485	0.00980426	26	1378917	1379074	35	1.74181	9.10656e-08	7.81794e-07	174	ENSG00000059145	-	UNKL	3545.48	0.97307
chr16	1770767	1771645	1771542	1771645	1770767	1770896	1771623	1771681	11	-1.52547	0.038292	0.100978	38	1771471	1771564	424	-0.936766	7.54968e-20	1.6655e-18	4807	1770892	1770948	9	0.570156	0.410902	0.597136	36	1770722	1770770	16	-0.550409	0.48315	0.661854	29	ENSG00000103024	-	NME3	1863.77	-1.16022
chr16	1772730	1773209	1773129	1773209	1772730	1772809	1773182	1773262	254	0.448231	0.00757659	0.0256969	1149	1773077	1773159	5023	-0.783869	1.72396e-22	4.35164e-21	30840	1772806	1772938	531	0.574482	9.36934e-06	6.01859e-05	2082	1772593	1772762	285	-1.83278	2.78755e-49	1.85696e-47	2183	ENSG00000074071	-	MRPS34	4108.95	-0.944504
chr16	1826571	1826967	1826801	1826967	1826571	1826611	1826936	1827025	372	1.04178	4.58383e-17	8.67664e-16	1692	1826738	1826831	1371	0.62602	5.52881e-10	6.11519e-09	8301	1826594	1826663	12	2.3664	0.000845857	0.00370226	39	1826500	1826604	155	0.614015	9.50529e-05	0.000509117	1068	ENSG00000063854	-	HAGH	2668.15	0.736628
chr16	1971939	1972761	1971939	1972054	1972614	1972761	1971857	1971946	108	-0.400563	0.0562748	0.138015	498	1971955	1972127	272	-0.0753768	0.471707	0.65121	2276	1972564	1972621	27	4.39294	7.05068e-08	6.13017e-07	67	1972761	1972808	9	-0.308967	0.832509	0.910449	8	ENSG00000183751	+	TBL3	2605.61	-0.277412
chr16	2205323	2205759	2205323	2205453	2205684	2205759	2205276	2205326	8	-0.329684	0.588117	0.746491	45	2205444	2205522	1591	0.216284	0.0301979	0.0830695	3958	2205633	2205693	7	-0.994295	0.278864	0.458809	25	2205736	2205936	127	-1.29783	9.05134e-18	1.7861e-16	1053	ENSG00000167965	+	MLST8	1432.76	-0.26964
chr16	2267860	2268219	2268113	2268219	2267860	2267915	2268157	2268259	48	1.01891	3.20179e-08	2.90914e-07	548	2268045	2268120	8988	-0.0926806	0.356101	0.541807	16087	2267907	2267962	5	1.75302	0.0348069	0.0933781	25	2267794	2267877	412	-0.944029	4.89453e-17	9.24405e-16	2528	ENSG00000205937	-	RNPS1	4522.55	-0.421706
chr16	2752560	2753136	2752560	2752677	2752965	2753136	2752489	2752595	64	0.772982	2.48361e-05	0.000147939	577	2752645	2752753	3780	0.485714	1.17297e-07	9.94369e-07	37937	2752917	2752973	18	-0.00264643	0.995162	0.997598	90	2753057	2753211	16	-1.14662	0.013458	0.042152	90	ENSG00000167978	+	SRRM2	30933.1	0.49518
chr16	2979759	2980601	2980443	2980601	2979759	2979795	2980584	2980719	36	-1.49901	6.8448e-07	5.24076e-06	261	2980367	2980460	1176	-2.79246	4.47661e-137	1.63825e-134	11275	2979796	2979845	5	-0.595127	0.542361	0.712276	18	2979714	2979764	34	-3.3107	4.76951e-08	4.23792e-07	115	ENSG00000127564	-	PKMYT1	2938.79	-2.79711
chr16	3020230	3021096	3020230	3020367	3020860	3021096	3020181	3020262	19	0.887712	0.0327689	0.0889346	93	3020339	3020416	21511	0.486954	4.28252e-10	4.78176e-09	68379	3020814	3020887	11	0.944106	0.102988	0.22152	49	3021074	3021170	25	0.359952	0.222791	0.392062	196	ENSG00000006327	+	TNFRSF12A	8911.38	0.481363
chr16	3880128	3880887	3880712	3880887	3880128	3880172	3880883	3880937	8	-0.34991	0.542923	0.712767	51	3880635	3880735	418	0.365019	0.00405892	0.0149373	2187	3880088	3880225	12	0.275149	0.581716	0.741852	63	3880018	3880129	9	0.201113	0.736592	0.851303	45	ENSG00000005339	-	CREBBP	5493.2	0.307862
chr16	4693430	4694275	4693430	4693717	4694176	4694275	4693379	4693437	5	0.152492	0.842734	0.916853	28	4693703	4693770	3939	-0.181864	0.0381153	0.10059	8318	4694099	4694206	45	-0.143762	0.570707	0.73359	270	4694261	4694322	3	0.313953	0.673673	0.809622	31	ENSG00000168101	+	NUDT16L1	2423.77	-0.295723
chr16	4802192	4802817	4802632	4802817	4802192	4802406	4802812	4802872	4	1.20344	0.0787668	0.179924	38	4802571	4802670	1547	0.0910747	0.310654	0.495166	8412	4802279	4802463	47	1.63224	5.20074e-09	5.19619e-08	296	4802144	4802196	30	1.85147	2.4575e-05	0.000146466	98	ENSG00000067836	-	ROGDI	1999.73	0.189349
chr16	10743754	10744303	10743754	10743840	10744096	10744303	10743703	10743757	5	-0.0755023	0.925699	0.962322	24	10743819	10743891	1192	-0.387258	4.72191e-05	0.000267882	4363	10744020	10744101	79	1.30849	8.60403e-13	1.21488e-11	569	10744273	10744355	30	0.0637603	0.857978	0.925388	139	ENSG00000103274	+	NUBP1	1468.13	-0.658455
chr16	22437214	22437582	22437214	22437312	22437460	22437582	22437071	22437215	16	-0.636379	0.0155453	0.0475919	273	22437198	22437358	81	0.0906656	0.645462	0.789714	512	22437316	22437474	44	0.346961	0.236923	0.40908	216	22437581	22437632	33	-0.5479	0.281013	0.461115	68	ENSG00000237296	+	SMG1P1	344.868	-0.196337
chr16	25257475	25257978	25257475	25257589	25257832	25257978	25257394	25257480	9	-2.2592	0.00375227	0.0139405	45	25257570	25257672	101	0.626285	0.00232221	0.00912563	567	25257771	25257937	56	-0.446884	0.0507048	0.126977	356	25257959	25258046	16	-0.390962	0.370784	0.557046	88	ENSG00000274925	+	ZKSCAN2-DT	195.643	0.504001
chr16	28822632	28823027	28822632	28822720	28822932	28823027	28822580	28822638	4	0.145493	0.826269	0.906571	42	28822709	28822832	845	1.36153	1.52189e-29	5.30096e-28	3155	28822875	28822945	36	0.0264954	0.935633	0.966916	154	28823012	28823314	307	-0.520883	4.82436e-08	4.28395e-07	6064	ENSG00000168488	+	ATXN2L	10289.8	0.352498
chr16	28822932	28824124	28822932	28823027	28823965	28824124	28822875	28822945	36	0.0264954	0.935633	0.966916	154	28823012	28823314	307	-0.520883	4.82436e-08	4.28395e-07	6064	28823919	28824086	81	1.24353	1.17048e-09	1.25124e-08	472	28824053	28824272	38	0.248023	0.196595	0.358631	503	ENSG00000168488	+	ATXN2L	10289.8	0.352498
chr16	28845458	28846476	28846334	28846476	28845458	28845599	28846451	28846529	18	1.67755	0.000114278	0.00060243	102	28846271	28846355	7935	-0.331933	0.000597033	0.00270795	49912	28845595	28845650	23	0.54338	0.297953	0.480627	66	28845330	28845500	46	-0.388642	0.194503	0.35582	226	ENSG00000178952	-	TUFM	10248.7	-0.530617
chr16	28924666	28925260	28925229	28925260	28924666	28925012	28925237	28925426	42	0.693109	0.00196446	0.00787274	388	28925133	28925246	416	0.343614	0.000176855	0.000894284	3789	28925006	28925174	19	1.68192	4.14983e-06	2.82729e-05	140	28924618	28924699	311	0.0385721	0.75431	0.862963	1384	ENSG00000177548	-	RABEP2	2465.59	0.0283597
chr16	29806729	29808130	29806729	29806886	29807920	29808130	29806675	29806763	15	-2.43498	7.39269e-06	4.83744e-05	98	29806869	29806936	1150	-2.75473	2.6118e-108	6.03255e-106	3916	29807768	29807957	43	1.32061	4.7823e-10	5.31244e-09	425	29808084	29808183	1090	-0.542711	4.31072e-09	4.34547e-08	7757	ENSG00000103495	+	MAZ	20776.3	-0.980014
chr16	29807920	29810259	29807920	29808130	29810160	29810259	29807768	29807957	43	1.32061	4.7823e-10	5.31244e-09	425	29808084	29808183	1090	-0.542711	4.31072e-09	4.34547e-08	7757	29810113	29810164	5	-2.86092	0.041046	0.106883	13	29810181	29810322	138	-1.34692	3.28227e-10	3.70256e-09	489	ENSG00000103495	+	MAZ	20776.3	-0.980014
chr16	29810900	29811460	29810900	29810968	29811242	29811460	29810834	29810915	11	-0.749218	0.155556	0.302245	78	29810963	29811034	86	-1.5106	2.01428e-09	2.10559e-08	428	29811192	29811247	6	2.20918	0.00911592	0.0301484	27	29811430	29811506	5	-0.35202	0.554736	0.72173	48	ENSG00000167371	+	PRRT2	157.306	-2.33335
chr16	29815999	29816899	29815999	29816183	29816783	29816899	29815887	29816109	34	-1.08742	9.44924e-05	0.000506307	280	29816073	29816251	668	-1.34625	2.75369e-40	1.40741e-38	7775	29816708	29816804	8	-1.06119	0.0635345	0.151784	60	29816865	29816961	124	-2.66615	3.63975e-61	3.25598e-59	1431	ENSG00000280789	+	PAGR1	1961.34	-1.43481
chr16	29816783	29817216	29816783	29816899	29816995	29817216	29816708	29816804	8	-1.06119	0.0635345	0.151784	60	29816865	29816961	124	-2.66615	3.63975e-61	3.25598e-59	1431	29816947	29817071	28	-1.28755	0.00105917	0.00453585	131	29817186	29817285	10	-4.66724	1.30055e-05	8.16753e-05	69	ENSG00000281348	+	ENSG00000281348	0.721679	-0.683727
chr16	29995167	29995689	29995611	29995689	29995167	29995379	29995683	29995765	21	-1.462	3.47944e-05	0.000202087	175	29995559	29995649	1769	-2.77417	2.72446e-153	1.26547e-150	5144	29995333	29995426	147	-1.29389	2.42314e-13	3.55753e-12	786	29995119	29995253	19	-2.65717	1.01456e-09	1.09132e-08	170	ENSG00000149929	-	HIRIP3	2367.03	-1.89499
chr16	30065560	30067299	30065560	30065759	30067278	30067299	30065243	30065603	90	1.39384	2.04852e-33	8.28581e-32	1813	30065746	30065920	48488	0.436059	1.52041e-08	1.43208e-07	268690	30067226	30067303	13	0.178951	0.65633	0.797418	102	30067252	30067369	40	-0.124054	0.613767	0.765825	382	ENSG00000149925	+	ALDOA	15692.1	0.759518
chr16	30378241	30378892	30378241	30378474	30378714	30378892	30378169	30378261	30	-0.438246	0.199102	0.3619	154	30378468	30378527	607	-1.01621	3.11531e-15	5.22531e-14	1598	30378652	30378787	13	-2.66896	7.76275e-08	6.70994e-07	130	30378893	30378944	13	-0.821403	0.354325	0.539951	23	ENSG00000180035	+	ZNF48	1420.05	-0.836577
chr16	30429283	30430219	30430016	30430219	30429283	30429400	30430219	30430288	7	0.578726	0.370959	0.557252	40	30429942	30430052	1748	-1.66368	6.91024e-60	5.99143e-58	20522	30429399	30429449	11	-0.847424	0.159184	0.307709	51	30429121	30429306	37	-1.06057	0.000142037	0.000733669	307	ENSG00000179958	-	DCTPP1	5366.65	-1.73853
chr16	30526773	30527663	30527290	30527663	30526773	30526896	30527562	30527715	11	-1.17062	0.0194282	0.0574662	85	30527252	30527338	1297	0.0202663	0.822352	0.904174	8967	30526891	30526950	18	-0.504475	0.38379	0.570235	54	30526722	30526822	250	-1.1374	1.1687e-16	2.15245e-15	2120	ENSG00000169957	-	ZNF768	4339.34	-0.748582
chr16	30571068	30572038	30571892	30572038	30571068	30571073	30572033	30572088	10	-0.948396	0.163171	0.313269	39	30571805	30571894	40	-1.6787	1.66231e-09	1.75218e-08	298	30571068	30571120	5	-2.0285	0.143858	0.285086	13	30571021	30571074	8	-1.16609	0.159168	0.307685	28	ENSG00000229809	-	ZNF688	694.213	-0.930391
chr16	30658738	30659887	30658738	30658848	30659847	30659887	30658693	30658743	13	2.437	0.0149778	0.0461278	20	30658698	30658900	712	1.75646	4.76978e-73	5.74385e-71	3276	30659796	30659851	7	0.323016	0.608128	0.761451	41	30659882	30659976	103	-1.31686	3.61725e-16	6.42411e-15	916	ENSG00000156860	+	FBRS	10091.9	0.708818
chr16	31033435	31034261	31033435	31033557	31034256	31034261	31033314	31033478	22	2.77083	7.96969e-20	1.7577e-18	271	31033528	31033628	4145	-0.207151	0.0120848	0.0383975	23610	31034210	31034330	67	1.64443	3.37744e-06	2.33369e-05	148	31034260	31034308	6	-0.602983	0.569486	0.732626	15	ENSG00000103496	+	STX4	2961.03	-0.178438
chr16	31073248	31073545	31073473	31073545	31073248	31073442	31073544	31073595	4	0.895649	0.237353	0.409602	31	31073421	31073488	21	-0.186253	0.675966	0.811165	92	31073442	31073493	13	2.35391	0.00454677	0.016483	29	31073176	31073276	9	-1.33477	0.0207682	0.060718	69	ENSG00000167394	-	ZNF668	1030.47	-0.301559
chr16	31073473	31073836	31073751	31073836	31073473	31073545	31073794	31073885	50	-0.0245022	0.909511	0.9535	373	31073670	31073768	275	-0.30581	0.0116658	0.0372214	1666	31073544	31073595	4	0.895649	0.237353	0.409602	31	31073421	31073488	21	-0.186253	0.675966	0.811165	92	ENSG00000167394	-	ZNF668	1030.47	-0.301559
chr16	31117505	31118019	31117505	31117663	31117893	31118019	31117444	31117532	243	1.1733	3.12535e-09	3.2039e-08	489	31117649	31117720	4089	0.284767	0.00569377	0.020057	8178	31117832	31117920	63	1.04452	3.33536e-06	2.30678e-05	366	31118014	31118084	6	0.168744	0.753954	0.862805	57	ENSG00000103510	+	KAT8	2042.95	0.129874
chr16	54285491	54287019	54286723	54287019	54285491	54285601	54287013	54287067	6	-2.97311	0.0030786	0.0117236	34	54286598	54286812	68	-1.91348	1.41971e-15	2.43491e-14	467	54285587	54285655	18	-2.13452	0.000649341	0.0029192	74	54285440	54285495	5	-0.785633	0.304212	0.487847	33	ENSG00000177508	-	IRX3	295.689	-1.66367
chr16	57619986	57620797	57619986	57620045	57620561	57620797	57619940	57619990	10	-0.209353	0.816555	0.900799	20	57620038	57620119	2505	0.925786	2.37074e-21	5.6375e-20	5858	57620487	57620565	11	0.0958355	0.876968	0.935873	43	57620793	57620846	5	0.116214	0.91308	0.955606	16	ENSG00000205336	+	ADGRG1	4243.38	0.515319
chr16	67159148	67159958	67159886	67159958	67159148	67159229	67159925	67160040	335	-0.562938	6.58698e-07	5.05618e-06	1945	67159835	67159915	340	0.211046	0.0742535	0.171745	2442	67159218	67159300	3	0.441709	0.521655	0.694841	36	67159102	67159149	9	0.207412	0.840643	0.915647	15	ENSG00000102871	-	TRADD	1451.39	0.0318852
chr16	67183571	67184139	67183962	67184139	67183571	67183747	67184034	67184186	17	-0.0945092	0.776852	0.877322	160	67183909	67183997	665	-0.30508	0.00705128	0.0241732	2244	67183731	67183820	53	0.484348	0.0720298	0.16762	232	67183514	67183593	29	-3.13447	2.23906e-11	2.80043e-10	177	ENSG00000196123	-	KIAA0895L	767.482	-0.643598
chr16	68235631	68236337	68236121	68236337	68235631	68235675	68236272	68236467	69	0.347313	0.185704	0.343776	392	68236048	68236155	1143	0.050902	0.538825	0.709212	7095	68235644	68235691	5	1.32861	0.0879283	0.196044	26	68235586	68235634	10	0.855472	0.471252	0.650793	12	ENSG00000103067	-	ESRP2	6295.53	0.0602988
chr16	69132158	69132648	69132569	69132648	69132158	69132351	69132623	69132701	1265	-0.745653	2.60428e-13	3.81221e-12	6233	69132516	69132593	4071	0.42482	3.31485e-06	2.29335e-05	18805	69132349	69132404	3	0.108243	0.914279	0.956225	16	69132083	69132189	216	-2.88701	1.57317e-55	1.21452e-53	1218	ENSG00000168802	-	CHTF8	120.67	0.327405
chr16	77190708	77191195	77190708	77190968	77191134	77191195	77190635	77190731	58	-0.094561	0.721074	0.841479	259	77190937	77191048	494	0.265158	0.0156795	0.0479397	2340	77191069	77191147	59	0.358742	0.311325	0.49597	128	77191181	77191350	349	-0.63605	2.52843e-08	2.32431e-07	3154	ENSG00000103111	+	MON1B	3886.54	-0.167395
chr16	79600019	79600886	79600733	79600886	79600019	79600198	79600884	79600994	22	4.17966	3.88354e-07	3.08233e-06	59	79600665	79600745	385	4.60588	8.84702e-89	1.41915e-86	1038	79600199	79600252	6	3.75959	0.00183854	0.00742266	23	79599972	79600046	48	4.37307	5.70111e-14	8.75952e-13	132	ENSG00000178573	-	MAF	1058.07	5.23781
chr16	81007138	81007582	81007138	81007213	81007431	81007582	81007088	81007162	31	0.624261	0.0943716	0.207159	122	81007176	81007289	785	-2.78451	9.34758e-165	5.37556e-162	8582	81007386	81007464	9	0.510472	0.360702	0.546323	54	81007543	81007623	23	1.67067	1.58247e-05	9.78462e-05	125	ENSG00000166451	+	CENPN	2610.38	-1.75809
chr16	88803621	88804855	88803621	88803820	88804618	88804855	88803481	88803642	100	-1.31978	8.42337e-11	1.00548e-09	582	88803784	88803867	1747	-2.47798	1.41454e-103	2.95259e-101	12670	88804557	88804641	14	-2.92205	1.017e-05	6.49097e-05	78	88804658	88804904	8	-3.0003	1.10937e-07	9.43191e-07	117	ENSG00000167513	+	CDT1	3489.15	-2.62345
chr16	89560538	89561752	89560538	89560681	89561701	89561752	89560486	89560569	388	-0.0661974	0.677201	0.81203	1478	89560652	89560806	14992	-0.187025	0.00254806	0.00992229	75538	89561654	89561713	4	0.53621	0.560552	0.725856	19	89561748	89561799	21	-1.13599	0.0628665	0.150528	51	ENSG00000167526	+	RPL13	14919.3	0.203925
chr16	89686594	89686996	89686594	89686690	89686911	89686996	89686526	89686601	9	0.918575	0.068112	0.160356	65	89686668	89686752	689	-0.204435	0.0361221	0.0962376	4167	89686852	89686931	33	-0.76123	0.0585221	0.14237	116	89686971	89687067	42	-0.851121	0.000162329	0.000827662	399	ENSG00000185324	+	CDK10	4535.94	-0.143338
chr16	89686911	89687590	89686911	89686996	89687310	89687590	89686852	89686931	33	-0.76123	0.0585221	0.14237	116	89686971	89687067	42	-0.851121	0.000162329	0.000827662	399	89687261	89687313	9	1.91335	0.0146617	0.0453146	31	89687540	89687637	18	-0.717803	0.276667	0.456473	42	ENSG00000185324	+	CDK10	4535.94	-0.143338
chr16	89721427	89722271	89721427	89721577	89722175	89722271	89721378	89721454	97	1.50371	7.0554e-11	8.46608e-10	366	89721539	89721636	187	-0.428583	0.00663217	0.0229176	893	89722130	89722207	25	0.797334	0.0370086	0.0981723	125	89722195	89722319	24	-0.792143	0.0605401	0.14614	104	ENSG00000158805	+	ZNF276	1916.17	-0.454258
chr17	1491203	1491768	1491677	1491768	1491203	1491332	1491761	1491808	10	-1.61344	0.06761	0.159419	30	1491612	1491711	323	-0.921762	6.89218e-14	1.05398e-12	1789	1491332	1491390	8	-0.413648	0.490085	0.667946	50	1491153	1491237	20	-2.27008	1.14021e-07	9.68151e-07	166	ENSG00000197879	-	MYO1C	10161	-1.10001
chr17	1628381	1628992	1628835	1628992	1628381	1628543	1628980	1629052	30	1.86695	7.55411e-08	6.54029e-07	195	1628780	1628853	1119	1.69106	7.38334e-69	7.95106e-67	5169	1628509	1628591	9	2.31231	1.90981e-05	0.000116258	71	1628314	1628397	56	1.3101	3.54609e-06	2.44174e-05	272	ENSG00000167703	-	SLC43A2	6766.74	2.07093
chr17	2041891	2042824	2041891	2042021	2042693	2042824	2041828	2041894	11	-1.09918	0.0823658	0.186288	46	2042005	2042184	1270	0.056173	0.555598	0.722252	5619	2042650	2042696	12	-1.09738	0.241684	0.415163	24	2042701	2042900	68	-0.388018	0.137434	0.275455	327	ENSG00000262664	+	OVCA2	0	NA
chr17	2337396	2338020	2337396	2337500	2337983	2338020	2337319	2337450	32	-0.146384	0.636507	0.783285	186	2337488	2337565	6455	0.0593991	0.483299	0.66197	18366	2337914	2338020	581	2.04631	3.24293e-75	4.10395e-73	2124	2338021	2338073	3	-0.35258	0.704898	0.831034	19	ENSG00000141258	+	SGSM2	6784.7	0.106733
chr17	4142968	4143701	4142968	4143199	4143613	4143701	4142941	4143052	452	0.74354	6.56352e-15	1.07571e-13	3646	4143163	4143284	758	1.47178	4.34308e-47	2.72162e-45	3341	4143547	4143647	55	-0.574831	0.011557	0.0369257	369	4143681	4143834	276	0.541105	1.8795e-07	1.55526e-06	2424	ENSG00000167740	+	CYB5D2	1280.78	1.26202
chr17	4947936	4948709	4948529	4948709	4947936	4948258	4948698	4948780	100	-1.24478	0.000543534	0.00248988	158	4948477	4948563	48914	-0.675405	3.21189e-16	5.72827e-15	187694	4948256	4948310	5	-0.135605	0.889641	0.942676	17	4947880	4947958	53	0.676448	0.0396297	0.103909	153	ENSG00000108518	-	PFN1	20747.9	-0.732591
chr17	4967477	4967912	4967812	4967912	4967477	4967542	4967912	4967961	10	0.17347	0.82525	0.905982	31	4967760	4967835	4174	0.019404	0.844835	0.918064	8023	4967423	4967625	128	1.28707	3.42381e-21	8.07125e-20	1128	4967430	4967482	9	1.49651	0.0579564	0.141287	28	ENSG00000091640	-	SPAG7	2056	-0.0710686
chr17	4987061	4987776	4987651	4987776	4987061	4987142	4987725	4987829	54	-1.5246	9.6496e-17	1.78732e-15	700	4987585	4987683	537	-0.787208	1.52252e-14	2.43534e-13	2754	4987125	4987211	19	-0.717671	0.0809409	0.183743	120	4987037	4987119	7	-2.22169	0.000451332	0.00210329	65	ENSG00000108509	-	CAMTA2	1684.18	-0.96636
chr17	4997901	4999396	4997901	4997944	4999053	4999396	4997837	4997910	15	-0.140158	0.764317	0.869216	77	4997917	4998164	532	0.155283	0.0752529	0.173581	7356	4999007	4999056	6	-1.09446	0.170256	0.323353	30	4999393	4999530	8	-0.604695	0.288389	0.469681	54	ENSG00000129250	+	KIF1C	11581.6	0.190475
chr17	5486182	5486864	5486182	5486568	5486816	5486864	5486117	5486198	1186	-0.477629	1.90424e-08	1.77561e-07	7864	5486532	5486622	1423	-1.39323	5.22339e-44	2.99366e-42	4999	5486752	5486822	22	0.296386	0.477987	0.657079	104	5486842	5486944	199	1.12922	2.21227e-13	3.2536e-12	961	ENSG00000167842	+	MIS12	1689.2	-0.774085
chr17	7014615	7015067	7014615	7014781	7014815	7015067	7014565	7014637	20	0.589547	0.202949	0.366937	77	7014746	7014849	3032	0.106263	0.271279	0.450371	11729	7014770	7014846	7	1.40546	0.105576	0.225834	25	7015035	7015136	113	-1.22316	6.7731e-12	8.88671e-11	728	ENSG00000258315	+	C17orf49	62.2082	0.461106
chr17	7251620	7252035	7251976	7252035	7251620	7251738	7252028	7252087	8	0.00717619	0.989451	0.994568	58	7251911	7252121	729	-0.357576	0.00471218	0.0169988	6816	7251722	7251802	12	-1.06021	0.0181909	0.0543695	99	7251223	7251735	75	-0.940837	3.48002e-09	3.54827e-08	999	ENSG00000175826	-	CTDNEP1	3431.2	-0.180149
chr17	7261098	7262698	7262477	7262698	7261098	7261263	7262678	7262751	16	0.289644	0.42961	0.613628	131	7262425	7262484	18297	-0.64111	8.64422e-13	1.21995e-11	31954	7261227	7261339	57	0.0884489	0.724465	0.843724	294	7261029	7261123	121	0.537154	0.00510577	0.018228	505	ENSG00000181885	-	CLDN7	7173.97	-0.646945
chr17	7583737	7584165	7583737	7583851	7584085	7584165	7583687	7583753	45	0.706679	0.0277044	0.0773404	164	7583836	7583901	3082	-0.763605	1.46141e-19	3.1816e-18	5879	7584031	7584103	98	0.637342	0.00812426	0.0272927	315	7584130	7584180	5	-2.44209	0.00987894	0.0322904	34	ENSG00000129255	+	MPDU1	3030.17	-0.863807
chr17	7843643	7844200	7843643	7843732	7843951	7844200	7843594	7843651	15	1.76468	0.00157986	0.00648797	60	7843719	7843785	480	2.28423	1.44123e-30	5.23349e-29	696	7843904	7843972	25	1.23648	0.00209261	0.00832554	103	7844073	7844249	194	1.42271	4.13495e-17	7.85158e-16	682	ENSG00000132510	+	KDM6B	3894.54	1.58168
chr17	7843951	7845050	7843951	7844200	7844736	7845050	7843904	7843972	25	1.23648	0.00209261	0.00832554	103	7844073	7844249	194	1.42271	4.13495e-17	7.85158e-16	682	7844685	7844888	104	2.86124	6.907e-41	3.57338e-39	574	7844960	7845100	30	2.43187	3.53339e-13	5.12436e-12	188	ENSG00000132510	+	KDM6B	3894.54	1.58168
chr17	7886076	7887651	7886076	7886185	7887416	7887651	7886047	7886106	3	-0.751909	0.522084	0.695224	13	7886167	7886229	93	-3.37192	1.9293e-09	2.02101e-08	132	7887368	7887422	8	0.553047	0.544951	0.714255	19	7887651	7887704	37	2.06497	4.86515e-05	0.00027538	75	ENSG00000170004	+	CHD3	6321.58	-1.18457
chr17	17591386	17591922	17591691	17591922	17591386	17591450	17591892	17591975	37	0.174003	0.586637	0.745418	173	17591627	17591713	746	-1.22752	3.25423e-30	1.16469e-28	2660	17591428	17591524	47	0.362068	0.14943	0.293179	268	17591358	17591404	6	1.24822	0.268271	0.447194	14	ENSG00000133027	-	PEMT	567.342	-1.12997
chr17	17836197	17837044	17836985	17837044	17836197	17836409	17837035	17837087	5	0.716965	0.555227	0.722059	11	17836933	17837015	18058	0.343307	5.75359e-06	3.83343e-05	39420	17836395	17836472	570	1.15643	2.4151e-23	6.36218e-22	1761	17836146	17836201	20	-1.34654	0.0419821	0.108865	47	ENSG00000072310	-	SREBF1	12608.5	0.257098
chr17	18183292	18184796	18183292	18183501	18184737	18184796	18183241	18183315	9	0.512393	0.314965	0.50012	66	18183471	18183580	438	-0.126494	0.19693	0.359111	3504	18184688	18184742	8	0.558554	0.521394	0.694629	21	18184797	18184844	10	1.13146	0.223879	0.393371	19	ENSG00000091542	+	ALKBH5	5422.59	0.327596
chr17	19377906	19378252	19377906	19378027	19378157	19378252	19377835	19377914	28	0.265038	0.479145	0.658093	117	19378026	19378077	47	-0.350405	0.374323	0.560652	108	19378104	19378166	12	0.100703	0.860317	0.926298	56	19378250	19378302	6	0.0705381	0.944503	0.971721	16	ENSG00000166484	+	MAPK7	560.515	-0.64786
chr17	21042235	21043361	21042971	21043361	21042235	21042521	21043362	21043400	7	0.993666	0.385008	0.571474	13	21042905	21043085	2751	0.326624	0.000293948	0.00142109	13453	21042520	21042574	6	0.226335	0.740993	0.854217	38	21042177	21042239	3	-1.61726	0.0346467	0.0930369	39	ENSG00000124422	-	USP22	13647.5	0.260288
chr17	28725687	28726344	28726213	28726344	28725687	28725887	28726324	28726396	10	-1.04462	0.0513353	0.128298	68	28726096	28726246	518	-0.466829	3.99896e-06	2.73199e-05	3073	28725863	28725963	22	-1.1944	0.00220077	0.0087022	141	28725624	28725694	27	-1.19322	0.00931023	0.0307044	104	ENSG00000160606	-	TLCD1	681.472	0.183791
chr17	28727102	28728032	28727926	28728032	28727102	28727109	28728033	28728082	7	-1.1801	0.14262	0.283267	31	28727878	28727956	64	-0.486003	0.113482	0.238563	205	28727109	28727271	50	0.59157	0.0965643	0.21088	126	28727036	28727133	28	2.82818	4.09887e-16	7.24445e-15	205	ENSG00000160606	-	TLCD1	681.472	0.183791
chr17	28728644	28729112	28728644	28728789	28728972	28729112	28728598	28728676	26	0.72331	0.0508853	0.127339	126	28728753	28728853	36	0.170966	0.474015	0.653381	295	28728924	28728993	6	-0.630207	0.397006	0.583735	33	28729099	28729159	9	2.53605	0.000787004	0.00346656	37	ENSG00000160602	+	NEK8	440.657	0.485429
chr17	28743801	28745527	28743801	28744007	28745252	28745527	28743701	28743934	158	2.84701	1.73797e-52	1.25574e-50	807	28743993	28744079	4593	1.95759	1.38034e-159	7.29304e-157	19130	28745200	28745350	132	4.21032	2.14915e-25	6.22834e-24	254	28745517	28745576	6	2.22328	0.00271074	0.010479	36	ENSG00000076604	+	TRAF4	13462.8	1.85997
chr17	28745839	28746915	28745839	28746058	28746604	28746915	28745770	28745847	9	3.15535	4.43034e-06	3.00556e-05	54	28746042	28746109	54	3.6849	2.24651e-11	2.80934e-10	106	28746566	28746676	7	5.92269	2.57449e-07	2.09085e-06	34	28746839	28746987	52	1.81856	2.38763e-09	2.47475e-08	205	ENSG00000076604	+	TRAF4	13462.8	1.85997
chr17	28950442	28951739	28951547	28951739	28950442	28950534	28951740	28951790	9	0.600336	0.549091	0.717589	17	28951244	28951593	207	0.15426	0.0878704	0.195948	3518	28950504	28950564	2	-3.12311	0.0179204	0.0536986	15	28950394	28950485	13	-1.77601	0.000248664	0.00121946	100	ENSG00000109118	-	PHF12	2658.05	0.11723
chr17	29390226	29390905	29390226	29390340	29390776	29390905	29390175	29390232	12	-1.96142	0.00932952	0.0307538	42	29390314	29390475	189	0.187253	0.0782817	0.179039	2558	29390726	29390796	16	0.875132	0.177957	0.333531	38	29390903	29390955	4	-0.308038	0.797746	0.889677	13	ENSG00000160551	+	TAOK1	5129.58	0.213583
chr17	36534218	36534883	36534817	36534883	36534218	36534334	36534855	36534936	13	1.45349	0.00146643	0.00606875	85	36534758	36534944	464	-1.94257	9.22058e-67	9.43669e-65	2751	36534296	36534380	20	-1.43233	0.00188982	0.00760556	101	36534173	36534222	5	-1.06838	0.251446	0.427571	23	ENSG00000278259	-	MYO19	2070.64	-1.39561
chr17	36544810	36545620	36544810	36544963	36545400	36545620	36544741	36544848	71	0.307749	0.142709	0.283414	399	36544939	36545105	172	-0.0847102	0.519127	0.693019	1178	36545344	36545407	15	-0.873714	0.178251	0.33393	48	36545485	36545682	111	0.126008	0.37394	0.560159	1105	ENSG00000278311	+	GGNBP2	1961.23	0.00691346
chr17	37406832	37407247	37406832	37406896	37407141	37407247	37406685	37406868	30	-0.778799	0.00435682	0.0158788	251	37406869	37406954	90	-0.478465	0.0128478	0.0404886	542	37407094	37407144	18	-0.615064	0.321995	0.507664	46	37407231	37407300	8	-2.5748	0.00179259	0.00725517	44	ENSG00000276234	+	TADA2A	333.206	-0.76645
chr17	38702401	38703980	38702401	38702469	38703844	38703980	38702332	38702403	7	-0.41416	0.436266	0.619533	58	38702452	38702602	126	-0.675572	0.00218102	0.00863419	388	38703774	38703850	25	-1.83642	4.94616e-06	3.33011e-05	162	38703978	38704030	9	0.398279	0.621096	0.771507	24	ENSG00000277969	+	ENSG00000277969	77.1351	-0.721098
chr17	38747557	38748491	38748335	38748491	38747557	38747619	38748470	38748559	10	-1.00872	0.0639019	0.152496	69	38748258	38748350	63	-1.8738	6.58777e-08	5.75432e-07	201	38747613	38747666	21	-0.774525	0.242691	0.416384	45	38747506	38747563	6	-0.277978	0.759488	0.866327	23	ENSG00000277258	-	PCGF2	965.758	-0.732247
chr17	38748335	38749921	38749791	38749921	38748335	38748491	38749887	38749972	61	-0.510393	0.0895322	0.19869	196	38749659	38749846	210	-0.264546	0.132774	0.268347	660	38748470	38748559	10	-1.00872	0.0639019	0.152496	69	38748258	38748350	63	-1.8738	6.58777e-08	5.75432e-07	201	ENSG00000277258	-	PCGF2	965.758	-0.732247
chr17	39461333	39462014	39461333	39461485	39461865	39462014	39461287	39461336	7	0.65713	0.595915	0.752502	11	39461485	39461564	633	-0.439579	0.00242045	0.00946941	2322	39461835	39461924	8	-0.698726	0.101698	0.219287	98	39461999	39462084	12	-0.742591	0.120134	0.24909	77	ENSG00000167258	+	CDK12	2590.52	-0.347613
chr17	39737821	39738351	39737821	39737961	39738224	39738351	39737771	39737829	4	3.28517	0.0087675	0.0291489	17	39737934	39738014	209	2.30406	5.04398e-43	2.81451e-41	849	39738174	39738226	9	2.44423	0.015051	0.0463028	21	39738316	39738402	112	1.54112	2.75674e-09	2.84166e-08	280	ENSG00000141738	+	GRB7	895.039	2.15202
chr17	40443287	40443906	40443287	40443449	40443813	40443906	40443235	40443294	30	-0.0281013	0.938431	0.968656	127	40443434	40443502	9208	0.224651	0.0290937	0.0805327	12306	40443748	40443826	22	2.02397	1.02373e-08	9.86349e-08	160	40443857	40443931	54	0.14518	0.421175	0.606378	609	ENSG00000141753	+	IGFBP4	13547.1	0.209211
chr17	41688632	41689543	41688632	41688886	41689299	41689543	41688591	41688639	6	-0.906027	0.261161	0.438994	28	41688880	41688939	36607	0.763188	5.84847e-24	1.59075e-22	85450	41689250	41689305	11	1.75299	0.00511154	0.0182455	46	41689503	41689624	142	2.1284	1.61665e-32	6.35652e-31	813	ENSG00000173812	+	EIF1	11341	0.615188
chr17	41785240	41786200	41785975	41786200	41785240	41785382	41786200	41786271	17	1.20361	0.00020072	0.00100308	161	41785909	41786074	1432	1.31618	2.71056e-49	1.8071e-47	5835	41785379	41785439	12	0.363736	0.552208	0.719804	45	41785172	41785242	9	1.71847	0.0026156	0.0101572	55	ENSG00000173801	-	JUP	39011.5	1.17896
chr17	44198738	44199489	44198738	44198839	44199366	44199489	44198690	44198741	6	-1.79849	0.122299	0.252458	17	44198833	44198891	787	0.440047	0.000282536	0.0013707	1651	44199304	44199377	124	-0.0818802	0.626869	0.775885	833	44199475	44199556	24	0.241972	0.384853	0.571362	235	ENSG00000267394	+	ATXN7L3-AS1	19.5931	0.0480412
chr17	44199366	44200022	44199725	44200022	44199366	44199489	44200020	44200075	4	2.54146	0.0688411	0.161654	11	44199647	44199757	221	-0.274369	0.0273274	0.0764621	2090	44199475	44199556	24	0.241972	0.384853	0.571362	235	44199304	44199377	124	-0.0818802	0.626869	0.775885	833	ENSG00000087152	-	ATXN7L3	4153.2	0.621571
chr17	44218540	44219572	44219497	44219572	44218540	44218798	44219558	44219617	5	0.847178	0.221435	0.390301	33	44219441	44219518	788	0.639029	2.54726e-07	2.07033e-06	2024	44218709	44219056	326	2.08135	1.89268e-51	1.33333e-49	1685	44218524	44218593	9	-2.32725	3.50589e-05	0.000203498	90	ENSG00000108312	-	UBTF	8943.78	0.417519
chr17	45247756	45248432	45247756	45247962	45248349	45248432	45247695	45247850	42	0.154526	0.456663	0.637463	416	45247873	45248065	174	-0.594508	3.27448e-05	0.000190865	1171	45248284	45248353	38	-0.81744	0.0107144	0.0346065	180	45248433	45248491	4	0.138361	0.867013	0.929956	24	ENSG00000267278	+	MAP3K14-AS1	286.166	-0.319249
chr17	46192914	46193599	46193378	46193599	46192914	46193018	46193565	46193651	194	0.737037	1.55856e-05	9.65164e-05	802	46193327	46193499	1173	0.385897	0.000931568	0.00404038	3116	46193016	46193071	12	0.926846	0.0905738	0.200517	54	46192869	46192999	9	-0.211879	0.628705	0.77718	93	ENSG00000120071	-	KANSL1	1451.58	0.333566
chr17	47530986	47532232	47530986	47531190	47532112	47532232	47530936	47530992	5	0.893462	0.21243	0.379363	31	47531093	47531263	219	0.824237	6.1278e-10	6.74593e-09	1815	47532035	47532119	20	1.60105	4.5726e-05	0.000259918	114	47532218	47532283	85	4.37372	1.14683e-21	2.77472e-20	218	ENSG00000141279	+	NPEPPS	8468.7	0.773559
chr17	47649631	47650219	47649631	47649918	47650126	47650219	47649274	47649648	104	0.886465	1.57407e-10	1.83033e-09	1076	47649827	47650089	1195	-0.397347	1.62718e-05	0.000100405	9634	47650081	47650129	3	-1.60335	0.176686	0.331941	15	47650189	47650269	52	-1.05352	0.00105696	0.00452756	187	ENSG00000108424	+	KPNB1	19324.2	-0.794139
chr17	47650126	47650775	47650126	47650219	47650495	47650775	47650081	47650129	3	-1.60335	0.176686	0.331941	15	47650189	47650269	52	-1.05352	0.00105696	0.00452756	187	47650437	47650527	13	-1.32094	0.000263924	0.00128802	171	47650770	47650848	16	-2.08809	2.90685e-05	0.000171016	107	ENSG00000108424	+	KPNB1	19324.2	-0.794139
chr17	48048049	48048783	48048049	48048362	48048603	48048783	48047986	48048075	125	0.815161	1.87235e-05	0.000114175	562	48048326	48048425	7518	-0.213677	0.00794013	0.0267538	45456	48048555	48048698	118	0.0707229	0.728385	0.846296	474	48048773	48049167	2517	0.79657	3.31562e-18	6.69907e-17	7686	ENSG00000082641	+	NFE2L1	15606.3	0.0979689
chr17	48908301	48909317	48908301	48908406	48908981	48909317	48908228	48908324	20	-1.00862	0.00993492	0.0324407	128	48908385	48908547	3636	0.0865625	0.302813	0.486212	15517	48908931	48909112	11	-1.05964	0.0179603	0.0538077	98	48909171	48909424	14	-0.244858	0.541414	0.711454	108	ENSG00000159202	+	UBE2Z	13453.7	0.132383
chr17	50371691	50373025	50372927	50373025	50371691	50371800	50373020	50373079	7	0.550665	0.365068	0.551028	42	50372858	50372934	897	4.36424	2.11224e-160	1.13733e-157	2437	50371797	50371849	5	3.90333	0.000867642	0.00378839	25	50371636	50371697	19	7.18318	2.54913e-11	3.17638e-10	81	ENSG00000108826	-	MRPL27	3253.91	0.816995
chr17	50372927	50373234	50373183	50373234	50372927	50373025	50373217	50373330	87	-2.62628	7.94059e-29	2.68829e-27	620	50373129	50373203	4802	0.71701	4.73789e-12	6.29752e-11	19020	50373020	50373079	7	0.550665	0.365068	0.551028	42	50372858	50372934	897	4.36424	2.11224e-160	1.13733e-157	2437	ENSG00000108826	-	MRPL27	3253.91	0.816995
chr17	50865553	50867257	50867195	50867257	50865553	50865691	50867252	50867310	12	4.47465	6.85513e-05	0.000377798	35	50867147	50867198	57	1.55433	0.000281991	0.00136837	94	50865688	50865741	13	-1.04361	0.143932	0.285206	37	50865496	50865566	15	0.596695	0.128642	0.26195	107	ENSG00000141232	-	TOB1	13780.5	0.461228
chr17	51166240	51166810	51166240	51166410	51166714	51166810	51166181	51166253	11	-0.471356	0.430548	0.614572	60	51166390	51166476	48639	-0.180739	0.0228092	0.0657391	195991	51166664	51166717	4	0.574618	0.513118	0.688011	21	51166776	51166874	1393	-0.634144	1.19525e-14	1.9279e-13	16672	ENSG00000243678	+	NME2	977.881	-0.390858
chr17	57085008	57085968	57085008	57085278	57085636	57085968	57084928	57085111	670	0.68415	1.67147e-10	1.93613e-09	3018	57085254	57085331	6489	-0.209233	0.0110188	0.0354339	18044	57085587	57085654	19	0.612589	0.130637	0.264973	97	57085945	57086018	16	0.363981	0.300712	0.483721	139	ENSG00000121057	+	AKAP1	8088.21	-0.265417
chr17	57256339	57257030	57256339	57256522	57256993	57257030	57256264	57256412	45	0.979005	0.000258176	0.00126245	258	57256395	57256872	307	-0.158787	0.129977	0.26395	3204	57256941	57257002	4	0.416535	0.684708	0.817418	16	57257006	57257092	20	0.0148484	0.966379	0.983023	139	ENSG00000153944	+	MSI2	4931.1	0.365027
chr17	57954516	57955416	57955272	57955416	57954516	57954852	57955309	57955489	23	2.52094	7.12042e-09	7.00083e-08	123	57955220	57955423	1826	1.27467	2.25074e-45	1.33898e-43	8472	57954548	57954931	361	2.9237	6.31213e-73	7.56883e-71	1167	57954467	57954520	8	1.86491	0.071411	0.166482	18	ENSG00000180891	-	CUEDC1	11037.9	1.63766
chr17	57987782	57988514	57988352	57988514	57987782	57988076	57988511	57988587	28	0.00537912	0.987875	0.993658	132	57988324	57988429	2348	0.990653	2.53357e-33	1.02087e-31	7503	57988070	57988125	6	0.702825	0.377514	0.563756	27	57987759	57987816	4	1.51153	0.0260217	0.0734016	40	ENSG00000136451	-	VEZF1	6341.24	0.67781
chr17	58006464	58007383	58007245	58007383	58006464	58006673	58007378	58007462	29	-1.57136	6.22774e-05	0.000345747	155	58007077	58007279	5453	-0.759481	3.00433e-27	9.46957e-26	23295	58006656	58006758	145	-1.24025	8.16112e-11	9.75135e-10	596	58006343	58006608	17	-1.08894	0.000102194	0.000544092	273	ENSG00000136450	-	SRSF1	5650.28	-0.870047
chr17	59619855	59620277	59619855	59619931	59620123	59620277	59619779	59619866	224	3.06205	1.96229e-104	4.23175e-102	1733	59619888	59619983	4543	-0.0935109	0.167664	0.319731	44938	59620072	59620128	5	2.1604	0.0505863	0.126755	17	59620278	59620326	13	0.724502	0.479171	0.658108	16	ENSG00000141367	+	CLTC	96557.5	0.00900159
chr17	59837636	59839419	59837636	59837930	59839297	59839419	59837579	59837727	144	-0.0646672	0.731566	0.848156	537	59837847	59837983	15226	1.49026	8.40538e-66	8.40896e-64	106907	59839105	59839302	80	0.494483	0.178404	0.334122	151	59839405	59839498	21	0.84211	0.0043528	0.0158669	221	ENSG00000062716	+	VMP1	52116.1	1.01371
chr17	59892925	59893925	59892925	59893120	59893851	59893925	59892836	59892935	410	-0.416585	2.37975e-05	0.000142173	4111	59893029	59893182	75344	0.219825	0.0028128	0.010824	219726	59893803	59893852	18	-0.598431	0.348486	0.53424	42	59893922	59893970	7	1.32381	0.215925	0.383695	15	ENSG00000108443	+	RPS6KB1	36536.9	0.0917146
chr17	61399586	61400479	61399586	61399882	61400441	61400479	61399401	61399618	747	-0.02754	0.781201	0.879895	9408	61399847	61400085	3534	-0.68771	8.77224e-14	1.33113e-12	19600	61400265	61400477	2561	1.59176	4.23573e-73	5.11531e-71	13254	61400385	61400491	72	-0.216156	0.117029	0.244239	1173	ENSG00000121068	+	TBX2	13172.5	-0.0381052
chr17	62478623	62479122	62478623	62478824	62479086	62479122	62478428	62478629	355	0.599553	8.27856e-08	7.13681e-07	4363	62478821	62479046	1091	-0.720095	4.2325e-09	4.2707e-08	3689	62479021	62479088	22	3.35863	6.1522e-07	4.74441e-06	62	62479104	62479432	309	0.282145	0.0188882	0.0561281	1661	ENSG00000146872	+	TLK2	3060.52	-0.152548
chr17	63445816	63446414	63446305	63446414	63445816	63445879	63446366	63446453	127	-0.335329	0.0140766	0.0437751	1173	63446101	63446326	2061	-0.686915	6.6057e-22	1.6158e-20	27119	63445653	63445929	37	-0.154619	0.552896	0.720256	277	63445772	63445830	4	-2.01528	0.0428991	0.110777	26	ENSG00000008283	-	CYB561	15199.5	-0.65519
chr17	63827385	63827720	63827385	63827459	63827662	63827720	63827338	63827389	4	0.203719	0.807602	0.895379	24	63827408	63827499	9920	0.190595	0.0484967	0.122438	57591	63827525	63827677	161	1.08882	6.29293e-06	4.16585e-05	310	63827702	63827784	1186	0.189798	0.106203	0.226847	5372	ENSG00000087191	+	PSMC5	22702.5	-0.0698116
chr17	64505369	64506399	64506288	64506399	64505369	64505513	64506393	64506446	3	-0.230219	0.79214	0.886135	24	64506236	64506295	109692	0.536212	5.92926e-13	8.47112e-12	136196	64505509	64505668	155	1.3191	1.27477e-13	1.91003e-12	624	64505322	64505397	21	2.92988	7.43616e-07	5.66658e-06	68	ENSG00000108654	-	DDX5	78812.7	0.521531
chr17	66964376	66965231	66964376	66964706	66965164	66965231	66964306	66964735	136	-0.634132	1.82146e-05	0.000111329	1306	66964675	66964779	5498	-0.302773	0.000582991	0.00265066	17822	66965117	66965193	7	0.461568	0.392837	0.579487	55	66965216	66965276	12	-1.08645	0.145655	0.287749	34	ENSG00000075461	+	CACNG4	11107.3	-0.454694
chr17	67825366	67826036	67825366	67825502	67825952	67826036	67825322	67825383	8	-1.87273	0.00493137	0.0176778	54	67825484	67825567	2099	0.110359	0.259497	0.437145	5291	67825934	67825995	7	-0.788645	0.198093	0.360589	50	67825908	67826191	35	-1.5083	3.47028e-15	5.80113e-14	664	ENSG00000171634	+	BPTF	12982.5	-0.00622736
chr17	68291441	68292047	68291441	68291506	68291949	68292047	68291216	68291486	53	-3.0443	1.07204e-37	5.03757e-36	814	68291304	68291589	227	-2.40496	2.763e-60	2.41045e-58	1968	68291886	68292034	10	-2.74597	4.74326e-06	3.20166e-05	90	68292042	68292131	24	-3.93934	1.49909e-10	1.747e-09	149	ENSG00000141337	+	ARSG	385.081	-1.65682
chr17	68512321	68513424	68512321	68512429	68513324	68513424	68512213	68512322	21	-0.170084	0.730122	0.847253	79	68512399	68512488	11933	0.392592	8.52417e-07	6.43794e-06	81411	68513278	68513345	8	1.46215	0.031013	0.0849303	37	68513424	68513471	23	0.19209	0.804862	0.893898	28	ENSG00000108946	+	PRKAR1A	18660.2	0.347414
chr17	75182562	75183215	75182930	75183215	75182562	75182650	75183188	75183257	3	-0.0799136	0.921539	0.960298	24	75182851	75182968	6580	-0.158692	0.0699676	0.163726	33848	75182626	75182702	42	-0.374384	0.287089	0.468114	139	75182509	75182596	757	-1.03133	2.14706e-23	5.66493e-22	3424	ENSG00000188612	-	SUMO2	2080.15	-0.189176
chr17	75270536	75271343	75271168	75271343	75270536	75270602	75271307	75271419	59	-0.698434	0.000168575	0.000856204	650	75271106	75271267	136	-1.22027	2.33441e-19	5.02014e-18	1477	75270598	75270650	6	-1.99972	0.142978	0.283782	13	75270486	75270540	12	-2.27899	0.0172411	0.0519642	30	ENSG00000125457	-	MIF4GD	629.008	-1.27912
chr17	75784573	75785047	75784573	75784844	75784981	75785047	75784511	75784595	5	-0.957841	0.0361432	0.0962817	90	75784813	75784909	1159	-0.653817	1.32203e-14	2.1247e-13	11267	75784930	75785001	16	0.521448	0.314122	0.499151	60	75785026	75785242	96	2.07815	6.20308e-25	1.76679e-23	619	ENSG00000132478	+	UNK	1744.92	-0.536289
chr17	75979133	75979599	75979133	75979270	75979395	75979599	75979081	75979174	773	0.270933	0.00272039	0.0105125	3479	75979233	75979320	1149	0.486094	8.21107e-08	7.08224e-07	4569	75979310	75979457	147	0.399756	0.0163874	0.049755	676	75979575	75979659	67	-0.335375	0.185289	0.343274	275	ENSG00000261408	+	TEN1-CDK3	100.674	0.680818
chr17	76736467	76737528	76737330	76737528	76736467	76736633	76737498	76737586	42	4.04143	4.39979e-34	1.82806e-32	348	76737280	76737336	26440	-0.612119	2.31662e-16	4.17298e-15	41311	76736545	76736810	50	0.655894	0.00650635	0.0225344	291	76736401	76736474	25	0.0471988	0.902747	0.949659	128	ENSG00000161547	-	SRSF2	11137.8	-0.647257
chr17	77281180	77282155	77281180	77281501	77282101	77282155	77281120	77281262	20	0.159935	0.650935	0.793475	134	77281462	77281553	8006	1.00955	1.01356e-33	4.14928e-32	35559	77282053	77282105	143	2.4622	9.6698e-18	1.90351e-16	259	77282150	77282203	29	3.40127	1.2464e-09	1.32786e-08	90	ENSG00000184640	+	SEPTIN9	34085.8	1.36074
chr17	77286176	77286772	77286176	77286325	77286663	77286772	77286028	77286204	325	6.66209	6.65862e-97	1.22368e-94	1787	77286300	77286466	564	5.01761	7.1867e-104	1.50753e-101	1335	77286587	77286678	144	5.40534	1.58009e-38	7.58085e-37	465	77286770	77286831	13	3.70438	1.63412e-06	1.18455e-05	54	ENSG00000184640	+	SEPTIN9	34085.8	1.36074
chr17	77287801	77288277	77287801	77287957	77288224	77288277	77287740	77287831	40	1.42661	2.12687e-07	1.74713e-06	236	77287911	77288008	1976	2.28509	3.92983e-132	1.2977e-129	10323	77288175	77288228	3	3.11352	0.0146668	0.045327	15	77288275	77288459	202	4.14042	1.24578e-61	1.12876e-59	671	ENSG00000184640	+	SEPTIN9	34085.8	1.36074
chr17	80415118	80415468	80415118	80415166	80415378	80415468	80415043	80415143	19	0.284323	0.346009	0.531784	190	80415160	80415240	416	0.487988	9.56581e-06	6.13408e-05	2384	80415330	80415395	11	1.05145	0.0459961	0.11735	62	80415434	80415540	80	-0.0143032	0.943888	0.971552	441	ENSG00000173818	+	ENDOV	1275.37	0.422096
chr17	81510726	81513008	81512798	81513008	81510726	81510789	81512997	81513083	383	2.85357	8.469e-67	8.678e-65	1325	81512746	81512807	318180	0.744898	5.48956e-15	9.05493e-14	706959	81510779	81510836	8	0.390732	0.732962	0.849033	12	81510594	81510839	127	0.535324	0.00422123	0.0154532	581	ENSG00000184009	-	ACTG1	221138	0.715059
chr17	81513855	81514840	81514757	81514840	81513855	81514058	81514819	81514876	6	0.766926	0.250405	0.426298	37	81514600	81514912	112	2.67018	1.70123e-51	1.19946e-49	873	81513852	81514108	22	0.954994	0.000325587	0.00155987	264	81513807	81513949	41	1.23593	0.000405845	0.00190677	138	ENSG00000184009	-	ACTG1	221138	0.715059
chr17	81712188	81712882	81712188	81712292	81712770	81712882	81712139	81712223	246	0.127115	0.423116	0.607963	839	81712282	81712466	1029	-0.842141	3.38108e-16	6.0186e-15	8613	81712725	81712771	19	-0.675345	0.371292	0.557568	33	81712877	81712942	25	-0.210487	0.575206	0.73689	122	ENSG00000183048	+	SLC25A10	1175.62	-0.876959
chr17	81977450	81977888	81977450	81977633	81977784	81977888	81977393	81977487	53	-0.88706	0.00275156	0.0106179	251	81977533	81977690	430	0.2146	0.0146393	0.0452552	4086	81977746	81977797	4	0.904279	0.198911	0.361671	34	81977858	81978143	23	0.803308	0.00016475	0.000838844	386	ENSG00000169696	+	ASPSCR1	2068.21	0.393046
chr17	82031543	82032115	82031543	82031666	82032034	82032115	82031494	82031550	4	-2.87154	0.0213549	0.0621667	22	82031643	82031729	310	-2.6166	5.70362e-70	6.36096e-68	1926	82031983	82032071	7	-1.26888	0.0689069	0.16175	42	82032106	82032187	37	-2.67034	1.07562e-12	1.50593e-11	228	ENSG00000169750	+	RAC3	522.386	-2.52532
chr17	83079471	83080185	83079471	83079608	83079911	83080185	83079420	83079495	50	1.52177	5.57681e-09	5.55224e-08	265	83079594	83079661	11699	1.03591	1.61963e-21	3.88858e-20	16303	83079883	83079915	14	4.09747	0.000356343	0.00169149	28	83080185	83080237	6	2.29999	0.0567934	0.138984	15	ENSG00000176845	+	METRNL	7586.41	1.13056
chr18	3262082	3262509	3262082	3262136	3262490	3262509	3261991	3262084	12	0.375226	0.352362	0.537873	101	3262126	3262207	8464	0.350542	2.10862e-05	0.000127316	42124	3262439	3262493	5	5.42599	3.86929e-07	3.07189e-06	67	3262362	3262763	55	1.37475	5.77074e-17	1.0836e-15	843	ENSG00000118680	+	MYL12B	17140.6	0.526731
chr18	3450030	3451592	3450030	3450176	3451504	3451592	3449892	3450058	143	-0.120474	0.586912	0.745679	376	3450169	3450351	1916	-0.0369791	0.695606	0.824668	4503	3451440	3451519	48	2.20767	5.52626e-11	6.692e-10	179	3451508	3451732	156	0.842972	6.03316e-08	5.29395e-07	843	ENSG00000177426	+	TGIF1	1995.57	0.679804
chr18	5295374	5296349	5296019	5296349	5295374	5295507	5296345	5296396	42	-0.284949	0.535954	0.706758	86	5295966	5296257	248	-1.67185	1.39758e-18	2.87669e-17	774	5295472	5295521	6	-1.23245	0.113767	0.239049	33	5295321	5295396	7	-0.857811	0.100569	0.217428	68	ENSG00000198081	-	ZBTB14	481.349	-1.4831
chr18	9136523	9137320	9136523	9136782	9137178	9137320	9136456	9136609	15	0.293375	0.361831	0.54749	170	9136769	9136858	663	0.274624	0.00790876	0.026663	5883	9137135	9137190	6	0.121629	0.914368	0.956237	13	9137293	9137388	24	0.462516	0.198528	0.361192	139	ENSG00000101745	+	ANKRD12	2251.62	0.397834
chr18	9475236	9475924	9475236	9475547	9475798	9475924	9475163	9475242	27	0.00782684	0.982465	0.990746	140	9475422	9475698	1014	0.296502	0.000268579	0.00130832	7770	9475751	9475801	22	-0.532034	0.501514	0.678221	29	9475905	9475974	10	-1.9823	0.00244512	0.0095593	57	ENSG00000017797	+	RALBP1	4257.81	0.279552
chr18	12947704	12948457	12947704	12948030	12948370	12948457	12947646	12947708	27	-1.04017	0.0238635	0.068312	90	12948004	12948100	1388	-0.715552	2.27944e-16	4.10863e-15	6893	12948325	12948372	13	0.267671	0.740121	0.853641	25	12948295	12948551	83	-1.28603	3.35292e-14	5.23343e-13	822	ENSG00000085415	+	SEH1L	1557	-0.841128
chr18	23135340	23136086	23135340	23135486	23135994	23136086	23135295	23135346	21	0.980375	0.115078	0.241132	42	23135382	23135524	466	0.0257684	0.856056	0.924353	1160	23135932	23135997	6	1.87586	0.00658537	0.0227745	41	23136080	23136123	6	0.269994	0.755612	0.863639	25	ENSG00000134508	+	CABLES1	994.284	0.179141
chr18	36128645	36129525	36129339	36129525	36128645	36128671	36129494	36129602	248	-0.399867	0.00107788	0.00460944	1742	36129126	36129348	25966	-0.343616	4.63046e-06	3.13102e-05	175070	36128658	36128725	7	-2.34579	1.79535e-05	0.000109891	92	36128600	36128646	19	0.76839	0.351167	0.536733	25	ENSG00000141424	-	SLC39A6	57267	-0.414639
chr18	36129842	36131589	36129842	36129923	36131535	36131589	36129687	36129860	193	-0.219099	0.190549	0.350422	799	36129894	36130082	1450	-0.373284	3.10905e-05	0.000182051	6725	36131418	36131538	29	-0.74397	0.0624475	0.149744	116	36131587	36131657	29	-1.56742	0.000141892	0.000733099	133	ENSG00000134759	+	ELP2	6795.1	-0.503767
chr18	47930646	47931309	47931089	47931309	47930646	47930754	47931299	47931371	8	-0.163231	0.760595	0.866943	57	47931053	47931144	68	0.586409	0.00104318	0.00447375	577	47930755	47930809	14	1.31615	0.0205494	0.0602011	51	47930519	47930674	62	0.416313	0.0280503	0.078164	519	ENSG00000175387	-	SMAD2	1813.28	0.343758
chr18	57802023	57803461	57803314	57803461	57802023	57802134	57803417	57803570	15	-0.0696292	0.862725	0.927623	101	57803013	57803329	745	-0.468606	9.66436e-08	8.26993e-07	7505	57802130	57802185	9	-2.24489	0.102089	0.219983	15	57801949	57802028	25	-2.22646	0.000228563	0.0011292	72	ENSG00000081923	-	ATP8B1	2666.47	-0.682132
chr19	632905	633729	633536	633729	632905	633023	633717	633810	44	-0.20684	0.495569	0.672699	198	633471	633557	649	-0.49034	4.20596e-06	2.86253e-05	2805	633023	633071	17	-0.440865	0.652124	0.794363	17	632859	632928	30	-0.491852	0.338071	0.523984	67	ENSG00000099821	-	POLRMT	1152.33	-0.468677
chr19	1237868	1238150	1238004	1238150	1237868	1237947	1238107	1238167	3	-2.18908	0.0541279	0.133803	20	1237953	1238066	366	-0.797818	1.81855e-05	0.000111175	607	1237946	1238014	9	-1.65925	0.00667738	0.0230449	57	1237816	1237883	29	-0.348189	0.4248	0.609157	92	ENSG00000099625	-	CBARP	328.71	-0.474113
chr19	1249556	1251568	1249556	1249762	1251431	1251568	1249507	1249560	26	1.32444	0.0167049	0.0505663	55	1249735	1249809	84	2.54402	1.15592e-13	1.73997e-12	187	1251381	1251433	7	-0.394755	0.701909	0.829047	16	1251531	1251606	16	0.762322	0.0658453	0.15608	110	ENSG00000167470	+	MIDN	8006.65	1.15046
chr19	1275408	1276020	1275408	1275541	1275789	1276020	1275325	1275416	61	0.334817	0.250539	0.426483	211	1275524	1275628	2131	0.338133	0.00018071	0.00091225	7334	1275726	1275815	125	0.644897	0.000801583	0.00352545	483	1275921	1276186	436	-1.14373	1.09541e-20	2.52252e-19	2097	ENSG00000228300	+	FAM174C	992.444	0.0266107
chr19	1941037	1942170	1941037	1941184	1942122	1942170	1940985	1941042	5	1.62559	0.0613451	0.147695	24	1941139	1941249	1499	0.81038	5.57438e-14	8.56793e-13	8708	1942073	1942161	9	1.28905	0.00798365	0.0268726	71	1942162	1942217	13	2.13131	0.00653295	0.0226145	30	ENSG00000133275	+	CSNK1G2	3238.33	0.670398
chr19	2270821	2273163	2270821	2270982	2273042	2273163	2270746	2270840	48	3.5317	1.25577e-16	2.30628e-15	165	2270976	2271057	61	1.42502	1.14528e-08	1.09683e-07	294	2273014	2273052	13	0.680878	0.510647	0.685904	20	2273160	2273213	11	0.0394051	0.938487	0.968669	71	ENSG00000104904	+	OAZ1	17321.9	0.233878
chr19	3572639	3574052	3572639	3572943	3573816	3574052	3572581	3572640	5	2.41562	0.0160632	0.0489288	20	3572929	3573016	1101	0.0571726	0.486856	0.665108	7417	3573754	3573842	60	-0.868705	3.3323e-05	0.000194008	460	3574051	3574099	21	-0.22197	0.761283	0.867343	35	ENSG00000064961	+	HMG20B	5856.8	-0.00951291
chr19	7916635	7916962	7916635	7916753	7916882	7916962	7916588	7916640	4	-1.74272	0.0839942	0.189141	22	7916739	7916860	23	-1.74531	8.61775e-07	6.50339e-06	186	7916775	7916948	15	-1.11825	0.000176364	0.000892065	232	7916915	7916973	6	-2.30207	0.000296176	0.00143112	68	ENSG00000260001	+	TGFBR3L	87.5581	-1.69363
chr19	10502714	10503400	10503327	10503400	10502714	10502856	10503394	10503467	4	-2.52779	0.0185355	0.0552373	26	10503123	10503461	367	0.011997	0.90989	0.95372	2396	10502791	10503050	43	1.84605	7.13616e-16	1.24692e-14	385	10502575	10502806	265	0.677487	1.64969e-10	1.91198e-09	2402	ENSG00000079999	-	KEAP1	5865.64	0.205768
chr19	10928605	10929619	10928605	10928844	10929569	10929619	10928474	10928642	557	0.277707	0.00343657	0.0129054	5436	10928721	10928892	729	0.211139	0.0241086	0.068904	5223	10929521	10929571	21	1.06552	0.0945433	0.207437	41	10929613	10929672	10	1.04482	0.157526	0.305196	30	ENSG00000142444	+	TIMM29	1755.5	0.273598
chr19	11089296	11090558	11089296	11089462	11090357	11090558	11089248	11089311	48	-1.81738	3.65612e-05	0.000211318	123	11089445	11089524	2931	0.59178	5.76518e-09	5.73101e-08	8999	11090285	11090385	199	3.94817	4.5122e-123	1.35264e-120	1590	11090468	11090629	109	2.93766	1.11549e-58	9.36436e-57	918	ENSG00000130164	+	LDLR	9184.3	0.497791
chr19	12681369	12681950	12681857	12681950	12681369	12681565	12681948	12682012	8	-0.491386	0.54683	0.71573	26	12681792	12681897	1782	-0.242366	0.00101322	0.00435786	13204	12681533	12681616	140	0.0131333	0.946926	0.97296	471	12681318	12681377	7	-2.86517	0.000292642	0.00141551	53	ENSG00000095059	-	DHPS	274.934	0.148387
chr19	12722258	12722801	12722538	12722801	12722258	12722316	12722789	12722866	24	-2.34025	1.01743e-06	7.59932e-06	124	12722475	12722688	127	-0.22954	0.119612	0.248275	1119	12722308	12722368	32	-1.52514	0.00261591	0.0101579	81	12722206	12722408	90	-1.43691	1.76131e-18	3.61044e-17	869	ENSG00000105576	-	TNPO2	5447.31	-0.83553
chr19	13764343	13765835	13764343	13764560	13765700	13765835	13764294	13764347	3	-0.182563	0.844071	0.917605	23	13764530	13764613	3183	1.40412	4.08708e-71	4.70075e-69	7837	13765585	13765717	6	4.41557	5.31145e-08	4.68915e-07	68	13765763	13765849	22	8.05724	9.74171e-15	1.57975e-13	246	ENSG00000037757	+	MRI1	2516.36	1.06577
chr19	14072627	14073606	14072627	14072785	14073442	14073606	14072555	14072634	16	-0.339081	0.489787	0.667712	70	14072752	14072852	545	-0.640749	7.05045e-12	9.2377e-11	3870	14073396	14073459	23	-0.320103	0.405459	0.592056	112	14073496	14073881	127	0.950391	1.01282e-15	1.75271e-14	1691	ENSG00000141854	+	MISP3	2042.84	-0.542396
chr19	14517851	14518762	14518396	14518762	14517851	14518010	14518759	14518845	15	0.75276	0.0499098	0.125388	107	14518339	14518414	7498	0.503885	2.01596e-07	1.66346e-06	22184	14518011	14518063	5	1.10279	0.111568	0.235465	34	14517778	14517941	118	0.896287	5.21213e-11	6.32429e-10	1435	ENSG00000132002	-	DNAJB1	12913.5	0.46314
chr19	15331898	15332612	15332538	15332612	15331898	15332212	15332594	15332679	48	-0.547955	0.0138946	0.0432902	364	15332463	15332561	3996	0.200183	0.0109855	0.0353388	17724	15332206	15332264	8	1.07199	0.141193	0.281169	34	15331847	15331913	308	-0.361069	0.00705099	0.0241732	1221	ENSG00000141867	-	BRD4	4128.29	0.0403301
chr19	15379269	15380066	15379784	15380066	15379269	15379359	15380059	15380114	39	3.44886	6.09923e-09	6.04531e-08	83	15379714	15379820	1138	0.183455	0.0415876	0.108064	5660	15379328	15379409	5	0.357523	0.692844	0.82287	25	15379219	15379313	30	0.0001973	0.999431	0.999668	261	ENSG00000105127	-	AKAP8	2528.55	0.130417
chr19	16076179	16077322	16076179	16076329	16077265	16077322	16076131	16076322	19	1.53214	1.66396e-05	0.00010257	151	16076316	16076382	4284	1.21664	1.24267e-48	8.09324e-47	13215	16077214	16077271	19	0.33082	0.519012	0.692979	64	16077319	16077386	13	0.351834	0.538784	0.709184	49	ENSG00000167460	+	TPM4	30133.1	0.663668
chr19	16077265	16077638	16077472	16077638	16077265	16077322	16077637	16077686	5	-0.205455	0.862163	0.92731	13	16077409	16077482	23	2.01938	1.52515e-06	1.11079e-05	108	16077319	16077386	13	0.351834	0.538784	0.709184	49	16077214	16077271	19	0.33082	0.519012	0.692979	64	ENSG00000279198	-	ENSG00000279198	116.841	1.23893
chr19	17215264	17215727	17215264	17215389	17215645	17215727	17215213	17215273	5	-0.552045	0.459033	0.639784	36	17215364	17215442	406	-0.168877	0.185854	0.343945	1381	17215570	17215655	4	0.659917	0.241977	0.415531	51	17215724	17215798	9	-3.07787	3.6395e-06	2.50259e-05	85	ENSG00000053501	+	USE1	338.939	-0.116676
chr19	17245399	17246065	17245918	17246065	17245399	17245457	17246053	17246100	10	1.75386	0.017535	0.0527147	32	17245843	17245948	414	-0.257818	0.0516682	0.128981	2140	17245452	17245506	6	0.770399	0.282026	0.462194	34	17245336	17245417	205	-0.442534	0.00109117	0.00466062	1268	ENSG00000160113	-	NR2F6	3080.37	-0.301061
chr19	18153013	18153368	18153013	18153194	18153315	18153368	18152933	18153018	12	0.809686	0.0536265	0.132842	95	18153170	18153272	2315	0.232994	0.00319629	0.0121167	20097	18153267	18153316	10	5.226	1.97284e-05	0.000119786	21	18153368	18153517	14	0.0540924	0.937289	0.967901	34	ENSG00000105647	+	PIK3R2	52.9625	0.245712
chr19	18280083	18281880	18281621	18281880	18280083	18280445	18281841	18281898	4	2.56233	0.00026776	0.00130493	44	18281570	18281637	57182	0.860275	1.51182e-25	4.40853e-24	118678	18280443	18280519	25	0.34627	0.396801	0.583525	98	18280034	18280114	587	0.601907	1.54991e-08	1.45857e-07	2223	ENSG00000130522	-	JUND	11979.4	0.845381
chr19	18373904	18374716	18373904	18374058	18374403	18374716	18373853	18373981	321	5.93769	9.17659e-47	5.67485e-45	662	18374045	18374202	442	6.92285	4.08774e-48	2.63787e-46	925	18374352	18374409	17	5.86353	3.83283e-07	3.04523e-06	33	18374706	18374857	75	4.63669	1.76306e-28	5.87938e-27	296	ENSG00000130513	+	GDF15	70165.9	4.43762
chr19	19033516	19033903	19033516	19033609	19033841	19033903	19033438	19033533	335	-0.118634	0.278371	0.458274	2208	19033594	19033798	340	-0.560051	4.78986e-08	4.25511e-07	2626	19033795	19033846	14	0.493638	0.310963	0.495552	74	19033880	19033963	209	-0.551416	8.92352e-05	0.00048082	1307	ENSG00000105676	+	ARMC6	1829.07	-0.642374
chr19	19663311	19663731	19663675	19663731	19663311	19663324	19663715	19663800	11	1.62556	0.0087693	0.0291492	46	19663622	19663691	4077	-0.0311646	0.70342	0.830056	13287	19663322	19663374	14	0.181529	0.792477	0.886371	37	19663266	19663313	25	0.460438	0.607149	0.760768	22	ENSG00000105726	-	ATP13A1	4561.25	-0.0555899
chr19	27793377	27794038	27793377	27793469	27793892	27794038	27793212	27793383	6	-1.99591	0.000571778	0.00260458	74	27793442	27793521	60	-2.24671	4.66645e-18	9.33908e-17	423	27793842	27793918	49	-1.81608	4.91337e-06	3.30935e-05	152	27794005	27794089	56	-0.346058	0.142236	0.282706	338	ENSG00000267575	+	ENSG00000267575	203.086	-1.43812
chr19	32405577	32406115	32405577	32405769	32406012	32406115	32405501	32405597	53	1.16265	2.74982e-11	3.41902e-10	588	32405659	32405848	459	-0.289026	0.0225967	0.0652046	1865	32405939	32406035	27	2.15824	2.92155e-16	5.22812e-15	309	32406084	32406163	255	-0.326109	0.0147801	0.0456238	1631	ENSG00000178904	+	DPY19L3	1383.52	-0.274907
chr19	35268434	35269107	35268434	35268583	35268919	35269107	35268397	35268447	4	1.75432	0.00503804	0.0180235	46	35268475	35268652	475	0.87781	4.97286e-16	8.76351e-15	2914	35268823	35269058	47	0.355226	0.076861	0.176481	495	35269085	35269298	250	-1.46956	2.10058e-28	6.98287e-27	1592	ENSG00000105698	+	USF2	4908.75	0.238434
chr19	35268919	35269821	35268919	35269107	35269696	35269821	35268823	35269058	47	0.355226	0.076861	0.176481	495	35269085	35269298	250	-1.46956	2.10058e-28	6.98287e-27	1592	35269611	35269699	13	0.248579	0.502751	0.679356	124	35269798	35269977	11	-0.194446	0.536355	0.707143	178	ENSG00000105698	+	USF2	4908.75	0.238434
chr19	36115345	36115792	36115345	36115467	36115675	36115792	36115280	36115371	49	-0.454997	0.111692	0.235673	236	36115451	36115537	1206	-0.945409	3.36227e-26	1.01079e-24	12063	36115624	36115690	11	-0.721477	0.177393	0.33281	65	36115762	36115929	31	-0.483929	0.0592279	0.143678	293	ENSG00000105254	+	TBCB	3439.06	-1.03549
chr19	36139845	36140668	36139845	36140065	36140518	36140668	36139832	36139964	8	-0.986287	0.082273	0.186128	68	36139977	36140147	2644	0.404613	1.52612e-06	1.11141e-05	13145	36140472	36140545	17	2.57439	0.000287736	0.00139377	44	36140667	36140716	21	1.26634	0.0766277	0.176065	31	ENSG00000126247	+	CAPNS1	13584.9	0.473355
chr19	36140518	36141339	36140518	36140668	36141204	36141339	36140472	36140545	17	2.57439	0.000287736	0.00139377	44	36140667	36140716	21	1.26634	0.0766277	0.176065	31	36141147	36141237	19	1.85395	6.8065e-09	6.70466e-08	200	36141331	36141488	6	1.99576	0.0111974	0.0359343	32	ENSG00000126247	+	CAPNS1	13584.9	0.473355
chr19	38264272	38265316	38264272	38264572	38265218	38265316	38264206	38264287	3	-1.54161	0.0538113	0.133202	34	38264559	38264717	19683	0.0659738	0.423972	0.608543	65997	38265166	38265252	7	-0.110039	0.848132	0.920041	55	38265276	38265357	7	0.827111	0.146239	0.288669	49	ENSG00000167642	+	SPINT2	23320.9	0.0460109
chr19	38735636	38737118	38736804	38737118	38735636	38735977	38737117	38737183	22	0.53051	0.296226	0.478609	64	38736658	38737035	95	1.66245	3.20991e-28	1.05708e-26	1143	38735975	38736024	6	0.635484	0.4966	0.673618	20	38735590	38735639	11	-0.145947	0.855262	0.923984	25	ENSG00000182472	-	CAPN12	298.063	1.41538
chr19	38837133	38838147	38838010	38838147	38837133	38837196	38838139	38838194	4	4.0351	0.000773534	0.00341345	26	38837961	38838013	28	1.54178	0.0115238	0.0368308	47	38837193	38837247	18	6.13629	6.46473e-08	5.65036e-07	39	38837005	38837238	15	6.45348	8.38978e-14	1.27492e-12	202	ENSG00000104824	-	HNRNPL	6352.94	0.473028
chr19	39406711	39407330	39406711	39406846	39407172	39407330	39406635	39406734	41	-0.440415	0.130749	0.265146	215	39406841	39406898	14410	-0.353636	2.94323e-05	0.000173072	17046	39407122	39407175	13	0.422174	0.549032	0.717578	35	39407318	39407399	19	-0.393982	0.289203	0.470562	121	ENSG00000128016	+	ZFP36	1919.38	-0.35705
chr19	40425579	40426150	40425991	40426150	40425579	40425709	40426121	40426229	157	4.3111	2.16028e-87	3.39445e-85	1005	40425940	40426005	2059	2.26272	3.7044e-88	5.87534e-86	2690	40425708	40425754	6	3.4484	0.00540642	0.0191606	18	40425528	40425604	13	2.54836	8.60952e-06	5.56859e-05	65	ENSG00000197019	-	SERTAD1	2763.26	2.13666
chr19	40716881	40718291	40716881	40717111	40718232	40718291	40716801	40716908	37	-0.306444	0.228466	0.399076	319	40716956	40717201	1530	1.07145	3.89613e-30	1.38679e-28	5252	40718184	40718247	42	1.48038	5.38267e-05	0.000302104	140	40718290	40718343	6	1.3503	0.118557	0.246637	23	ENSG00000086544	+	ITPKC	2312.19	1.02198
chr19	41860148	41860438	41860148	41860254	41860361	41860438	41859997	41860164	37	1.10273	0.000243505	0.0011961	187	41860219	41860298	10240	1.34992	3.58473e-55	2.73995e-53	56179	41860299	41860362	3	4.70179	8.06395e-05	0.00043791	25	41860419	41860508	1375	3.30135	2.23645e-239	3.70707e-236	9841	ENSG00000105372	+	RPS19	27281.4	1.35641
chr19	42268263	42269018	42268263	42268553	42268767	42269018	42268208	42268270	15	1.30371	0.00718278	0.0245583	83	42268441	42268606	641	1.46621	1.54562e-38	7.41968e-37	2169	42268718	42268793	29	3.40706	1.65511e-08	1.55299e-07	81	42268990	42269094	46	2.91228	7.28146e-29	2.47009e-27	389	ENSG00000079432	+	CIC	6629.99	1.05245
chr19	42268767	42270571	42268767	42269018	42270475	42270571	42268718	42268793	29	3.40706	1.65511e-08	1.55299e-07	81	42268990	42269094	46	2.91228	7.28146e-29	2.47009e-27	389	42270419	42270480	16	3.60811	3.68394e-05	0.000212795	41	42270559	42270643	31	5.30457	1.90738e-24	5.30576e-23	276	ENSG00000079432	+	CIC	6629.99	1.05245
chr19	42283792	42284471	42283792	42284079	42284268	42284471	42283710	42283793	4	-0.78295	0.260779	0.438562	41	42284007	42284131	160	-1.86141	2.37762e-16	4.27921e-15	549	42284223	42284271	4	-1.23102	0.146961	0.289646	29	42284456	42284542	20	-2.05411	1.62032e-05	0.000100004	112	ENSG00000079432	+	CIC	6629.99	1.05245
chr19	42302066	42302432	42302333	42302432	42302066	42302131	42302419	42302507	51	0.650982	0.0269861	0.075685	189	42302281	42302717	1343	-1.57224	4.1866e-64	4.0218e-62	11699	42302130	42302180	88	-1.79626	2.09793e-05	0.000126697	128	42301990	42302068	6	-3.06012	0.0021734	0.00860847	36	ENSG00000079462	-	PAFAH1B3	1724.75	-1.68759
chr19	43619273	43619685	43619600	43619685	43619273	43619536	43619654	43619738	11	0.246821	0.566689	0.730424	91	43619554	43619636	2223	0.238135	0.00170147	0.00693016	9345	43619359	43619600	83	0.805728	5.99138e-07	4.6301e-06	720	43619221	43619280	4	2.48396	0.00213533	0.00847515	31	ENSG00000131116	-	ZNF428	1519.19	-0.0980441
chr19	43754592	43755087	43754920	43755087	43754592	43754725	43755083	43755164	85	-1.4213	1.38823e-09	1.47524e-08	476	43754858	43755024	470	-0.49944	1.96487e-07	1.62384e-06	3186	43754712	43754783	11	-1.3796	0.0112016	0.035945	70	43754521	43754597	9	-0.800117	0.21302	0.380088	43	ENSG00000105771	-	SMG9	1875.24	-0.413498
chr19	44500190	44500648	44500519	44500648	44500190	44500294	44500622	44500696	22	0.400643	0.292531	0.474334	117	44500461	44500534	223	-0.398424	0.0115586	0.0369295	924	44500284	44500331	5	0.847432	0.348377	0.534131	21	44500138	44500207	8	-2.6974	0.000779683	0.00343717	48	ENSG00000167384	-	ZNF180	594.478	-0.462474
chr19	45092828	45094658	45092828	45092949	45094335	45094658	45092775	45092835	125	0.699211	0.00523065	0.0186165	268	45092946	45093048	331	0.805766	4.41526e-14	6.84231e-13	2187	45094305	45094352	8	0.156074	0.900541	0.948485	11	45094656	45094711	7	0.0460188	0.95469	0.976877	27	ENSG00000104866	+	PPP1R37	6106.31	0.298097
chr19	45178422	45179412	45178422	45178783	45179387	45179412	45178387	45178433	12	3.01936	0.0230999	0.0664457	14	45178757	45179093	409	0.118804	0.308491	0.492896	1754	45179340	45179394	9	0.387097	0.584319	0.743703	32	45179400	45179481	27	-0.00960183	0.978199	0.988572	149	ENSG00000189114	+	BLOC1S3	1400.08	0.0236851
chr19	45179387	45179645	45179387	45179412	45179561	45179645	45179340	45179394	9	0.387097	0.584319	0.743703	32	45179400	45179481	27	-0.00960183	0.978199	0.988572	149	45179497	45179565	12	0.559274	0.394741	0.581467	36	45179644	45179692	10	2.07945	0.0181126	0.0541762	26	ENSG00000189114	+	BLOC1S3	1400.08	0.0236851
chr19	45405065	45406395	45406342	45406395	45405065	45405174	45406381	45406446	37	-0.885272	0.0760459	0.175014	78	45406293	45406365	531	0.38534	0.00489175	0.0175566	1257	45405163	45405221	6	1.28401	0.186495	0.34479	17	45404994	45405096	449	0.69621	5.80293e-12	7.65735e-11	2655	ENSG00000104881	-	PPP1R13L	1738.07	0.493578
chr19	45768265	45768948	45768850	45768948	45768265	45768424	45768944	45769007	11	0.250988	0.722209	0.842269	32	45768687	45769068	126	-0.313129	0.046204	0.117789	834	45768280	45768608	28	0.36107	0.0993049	0.215426	358	45768214	45768299	12	0.424476	0.354086	0.539674	77	ENSG00000177045	-	SIX5	1394.27	-0.0852423
chr19	46786532	46787361	46787292	46787361	46786532	46786586	46787360	46787638	25	-1.05981	0.000434056	0.00202928	240	46787238	46787460	103	-1.2969	1.08425e-08	1.04192e-07	464	46786586	46786633	11	1.40877	0.094538	0.207435	24	46786482	46786537	10	0.605396	0.448875	0.630408	28	ENSG00000105281	-	SLC1A5	20277.8	0.0415946
chr19	46860836	46862307	46860836	46861005	46862176	46862307	46860761	46860930	34	-0.640155	0.0141515	0.0439658	286	46860979	46861173	766	-0.202338	0.022187	0.064213	6735	46862131	46862188	8	1.61452	0.023516	0.067482	33	46862306	46862356	21	-0.0137109	0.979749	0.989276	54	ENSG00000160007	+	ARHGAP35	8128.88	0.055873
chr19	47227109	47228088	47227914	47228088	47227109	47227267	47228075	47228136	23	-1.11686	0.0313579	0.0857472	73	47227864	47228006	49	0.908616	0.0102357	0.0332956	131	47227249	47227315	17	-0.786003	0.143107	0.283977	63	47227050	47227112	14	1.63455	0.00258822	0.0100624	60	ENSG00000105327	-	BBC3	5913.45	4.07504
chr19	47229799	47231452	47231198	47231452	47229799	47230040	47231318	47231502	59	3.72335	1.40359e-33	5.71274e-32	411	47231133	47231218	11457	4.0045	0	0	24181	47229996	47230046	7	2.10083	0.0103628	0.0336431	31	47229589	47229805	35	3.85607	7.26258e-15	1.18798e-13	144	ENSG00000105327	-	BBC3	5913.45	4.07504
chr19	47274211	47274884	47274211	47274422	47274636	47274884	47274162	47274235	8	-0.514493	0.405922	0.592537	50	47274407	47274487	294	-0.777707	3.33259e-10	3.75681e-09	2452	47274590	47274665	8	-1.37232	0.0352487	0.0943178	49	47274863	47274961	213	-1.19039	2.58631e-23	6.81109e-22	2266	ENSG00000257704	+	INAFM1	479.218	-0.540919
chr19	47745420	47745815	47745420	47745549	47745772	47745815	47745373	47745426	9	-0.846852	0.294891	0.477099	30	47745535	47745602	26344	0.807647	3.89825e-28	1.2773e-26	53783	47745724	47745808	21	0.761458	0.0194453	0.0574986	159	47745795	47745867	9	-0.674197	0.261424	0.439262	55	ENSG00000105373	+	NOP53	8631.08	0.780104
chr19	48271247	48271621	48271247	48271371	48271443	48271621	48271201	48271249	8	-0.65646	0.583843	0.743343	13	48271343	48271452	62	-2.57579	3.161e-23	8.29355e-22	499	48271398	48271445	4	-2.00445	0.0417301	0.108344	26	48271619	48271669	4	-4.77296	7.54962e-05	0.000412497	27	ENSG00000178150	+	ZNF114	265.276	-0.840221
chr19	48954725	48955329	48954725	48954893	48955133	48955329	48954677	48954729	6	1.09614	0.162204	0.311951	26	48954805	48954970	13852	2.42413	2.20626e-161	1.22703e-158	105156	48955107	48955187	54	6.08505	7.58604e-23	1.95278e-21	311	48955226	48955391	87	4.7598	9.53315e-63	8.86573e-61	723	ENSG00000087088	+	BAX	11431.9	2.36529
chr19	49118738	49119407	49119110	49119407	49118738	49119073	49119258	49119458	30	-0.600007	0.00161835	0.00662867	585	49119055	49119151	124	0.353386	0.0419913	0.108885	604	49119067	49119116	12	-0.0709905	0.929051	0.963742	27	49118681	49118754	23	-0.497707	0.241277	0.414657	98	ENSG00000221916	-	C19orf73	84.8481	0.256194
chr19	49453095	49453638	49453095	49453299	49453482	49453638	49453044	49453117	56	0.267318	0.390345	0.577044	188	49453211	49453359	1002	-0.0939465	0.33024	0.516094	4466	49453409	49453510	295	0.237528	0.0925568	0.204031	1322	49453607	49453690	155	-0.323639	0.0987429	0.214529	518	ENSG00000161618	+	ALDH16A1	3101.17	-0.0921307
chr19	49664525	49664776	49664725	49664776	49664525	49664618	49664776	49664829	8	0.778684	0.270349	0.449408	37	49664674	49664733	49	-0.136806	0.709242	0.83369	129	49664612	49664688	26	1.16721	0.000817126	0.0035869	145	49664468	49664529	11	0.518269	0.284236	0.464788	73	ENSG00000126456	-	IRF3	4600.46	-0.317335
chr19	49664725	49665993	49665779	49665993	49664725	49664776	49665960	49666068	757	-1.79399	3.49814e-76	4.4942e-74	6688	49665553	49665877	2018	-0.477349	7.64076e-09	7.47592e-08	14743	49664776	49664829	8	0.778684	0.270349	0.449408	37	49664674	49664733	49	-0.136806	0.709242	0.83369	129	ENSG00000126456	-	IRF3	4600.46	-0.317335
chr19	49851084	49851790	49851084	49851158	49851677	49851790	49851005	49851091	176	1.45943	1.5352e-19	3.33624e-18	1168	49851140	49851233	2735	0.069004	0.464727	0.644892	7054	49851609	49851691	52	0.18959	0.510957	0.686157	213	49851791	49851832	13	1.17571	0.198894	0.361654	19	ENSG00000104960	+	PTOV1	5295.94	0.199941
chr19	49865420	49867686	49867562	49867686	49865420	49865550	49867670	49867738	17	0.0909386	0.842763	0.916853	79	49867493	49867593	661	-0.469169	2.79157e-07	2.25804e-06	4374	49865547	49865601	5	-0.768296	0.497069	0.673995	13	49865373	49865426	10	-1.28929	0.112536	0.237067	30	ENSG00000039650	-	PNKP	2249.1	-0.726137
chr19	49928957	49929593	49928957	49929204	49929437	49929593	49928907	49928959	7	-3.45074	0.00680634	0.0234466	19	49929199	49929254	2787	-1.17952	7.20614e-33	2.87348e-31	4883	49929378	49929545	1370	-1.7988	4.03465e-89	6.48428e-87	6177	49929589	49929640	11	-1.41299	0.066348	0.156986	35	ENSG00000169136	+	ATF5	2368.91	-1.21042
chr19	51704149	51705419	51704149	51704320	51705220	51705419	51704116	51704153	8	4.00714	0.00180631	0.00730439	16	51704292	51704386	654	2.90597	2.01149e-150	8.54489e-148	3672	51705172	51705228	19	5.70854	2.44165e-07	1.98889e-06	49	51705420	51705486	10	1.24865	0.329146	0.514947	34	ENSG00000182310	+	SPACA6	510.943	0.856555
chr19	54449040	54449515	54449040	54449199	54449429	54449515	54448993	54449063	297	0.36825	0.00200288	0.00801264	1625	54449181	54449272	782	0.678544	1.33741e-10	1.56657e-09	3982	54449361	54449448	88	0.538942	0.0561674	0.137821	231	54449482	54449572	259	1.21869	8.85497e-13	1.24802e-11	667	ENSG00000167615	+	LENG8	7366.05	0.576697
chr19	55339360	55341459	55339360	55339552	55341318	55341459	55339334	55339368	8	4.39045	0.000441393	0.00206061	21	55339550	55339603	42	1.91804	6.3295e-05	0.000350935	85	55341268	55341331	14	2.88384	4.51428e-06	3.05711e-05	59	55341457	55341507	10	0.418853	0.687918	0.819484	14	ENSG00000133247	+	KMT5C	1726.37	0.547345
chr19	55600233	55600667	55600233	55600336	55600531	55600667	55600185	55600242	8	-0.517094	0.452551	0.633748	41	55600180	55600397	192	1.24243	5.0867e-22	1.25112e-20	1458	55600486	55600536	9	-1.3021	0.0885571	0.197095	34	55600653	55600718	80	2.48567	1.19792e-10	1.40884e-09	140	ENSG00000171443	+	ZNF524	586.867	1.34001
chr19	55640977	55643227	55640977	55641056	55643076	55643227	55640931	55640983	5	-1.24087	0.334694	0.520631	13	55640909	55641176	527	-0.43444	8.57196e-07	6.46999e-06	6534	55643003	55643102	25	-1.84534	9.21976e-08	7.9103e-07	230	55643126	55643280	18	-1.71765	0.000331304	0.00158402	103	ENSG00000213015	+	ZNF580	1127.26	0.277941
chr19	55653751	55654575	55653751	55654123	55654479	55654575	55653702	55653759	3	-2.86766	0.0200593	0.0589842	22	55654095	55654253	639	-0.303033	0.00175557	0.00712478	2787	55654428	55654487	6	1.55199	0.0128138	0.0403933	45	55654427	55654656	56	-0.630996	0.000183633	0.000926007	794	ENSG00000063244	+	U2AF2	14097	-0.188098
chr19	58362503	58362987	58362750	58362987	58362503	58362605	58362988	58363038	5	-2.68184	0.0314267	0.0859076	19	58362675	58362851	271	-0.108248	0.461359	0.64184	936	58362569	58362658	22	0.38442	0.321957	0.507651	122	58362453	58362506	18	-1.0568	0.141006	0.280896	38	ENSG00000268230	-	ENSG00000268230	26.0604	0.41361
chr19	58380705	58381384	58381029	58381384	58380705	58380830	58381345	58381430	284	0.727304	2.16571e-09	2.25524e-08	1549	58380982	58381059	603	0.0990545	0.51196	0.687056	899	58380806	58380881	34	-0.0897421	0.794873	0.887924	138	58380655	58380732	8	-1.45992	0.0575335	0.140462	37	ENSG00000152475	-	ZNF837	340.987	0.29918
chr19	58519558	58519921	58519788	58519921	58519558	58519729	58519921	58519970	14	0.332397	0.531354	0.702819	59	58519739	58519967	203	-0.701618	1.46496e-07	1.22713e-06	1551	58519726	58519781	4	0.831315	0.329546	0.515316	23	58519492	58519576	32	-1.91627	1.01132e-06	7.55575e-06	166	ENSG00000119574	-	ZBTB45	880.163	-0.603889
chr19	58573317	58573676	58573517	58573676	58573317	58573487	58573658	58573757	15	0.718462	0.020889	0.0610204	174	58573466	58573552	193	1.69855	1.2433e-29	4.34493e-28	1153	58573483	58573551	23	1.27648	0.0104989	0.0340181	69	58573248	58573404	92	-0.0934953	0.530154	0.70193	868	ENSG00000099326	-	MZF1	1610.49	0.884755
chr2	44948	46718	46504	46718	44948	45066	46701	46857	7	-0.00240931	0.996605	0.998266	54	46433	46639	469	0.547389	1.30168e-06	9.57693e-06	1931	45062	45113	9	2.85671	0.0326569	0.0886965	13	44902	44952	6	1.4908	0.11043	0.2336	19	ENSG00000184731	-	FAM110C	1082.54	0.467589
chr2	3518878	3519662	3519530	3519662	3518878	3519050	3519657	3519713	5	-0.457474	0.510451	0.685743	34	3519478	3519545	39391	-0.0608192	0.441242	0.623577	74192	3519050	3519098	7	0.550454	0.502254	0.678913	23	3518824	3518905	7	0.889248	0.0658637	0.15612	72	ENSG00000182551	-	ADI1	6701.01	-0.160402
chr2	8678680	8678947	8678804	8678947	8678680	8678738	8678928	8679166	26	0.000197979	0.999502	0.999692	167	8678752	8678875	50	2.2739	1.74349e-10	2.0168e-09	157	8678728	8678786	19	0.481426	0.564118	0.728477	27	8678619	8678683	7	1.37167	0.084236	0.189551	32	ENSG00000235092	-	ID2-AS1	452.795	2.8384
chr2	9422970	9423282	9423175	9423282	9422970	9423031	9423270	9423333	22	0.225418	0.599363	0.754984	99	9423119	9423209	434	-0.970092	9.82959e-18	1.9329e-16	2670	9423028	9423067	12	1.0151	0.145706	0.287831	33	9422893	9422974	13	-1.40316	0.00293065	0.0112199	93	ENSG00000119185	-	ITGB1BP1	2045.24	-1.22395
chr2	9423175	9423653	9423527	9423653	9423175	9423282	9423533	9423731	521	-0.592433	2.66757e-08	2.44424e-07	3389	9423380	9423633	1288	-1.19283	8.26534e-40	4.16897e-38	12527	9423270	9423333	22	0.225418	0.599363	0.754984	99	9423119	9423209	434	-0.970092	9.82959e-18	1.9329e-16	2670	ENSG00000119185	-	ITGB1BP1	2045.24	-1.22395
chr2	11465583	11466301	11466157	11466301	11465583	11465670	11466301	11466352	6	-2.29227	0.0368807	0.0978956	23	11465986	11466172	1150	-0.136375	0.179915	0.336095	4023	11465654	11465727	36	0.223693	0.582509	0.74232	136	11465537	11465587	7	-0.0251628	0.973825	0.986092	28	ENSG00000169016	-	E2F6	814	-0.181791
chr2	11539534	11540150	11539534	11539649	11540074	11540150	11539392	11539556	21	1.6864	3.77095e-06	2.5873e-05	143	11539645	11539994	650	0.284629	0.00734563	0.0250311	6412	11539952	11540097	96	-1.77834	1.97635e-07	1.63268e-06	204	11540147	11540206	4	-2.19071	0.050357	0.126268	21	ENSG00000196208	+	GREB1	11568	-0.408586
chr2	11542522	11544039	11542522	11542688	11544014	11544039	11542424	11542587	30	-0.322506	0.203126	0.36714	283	11542572	11542764	298	-1.31407	1.26684e-24	3.55204e-23	2289	11543966	11544016	9	0.0929393	0.91464	0.956387	22	11544039	11544086	3	-1.04517	0.23063	0.401602	26	ENSG00000196208	+	GREB1	11568	-0.408586
chr2	24793061	24793442	24793344	24793442	24793061	24793153	24793420	24793512	228	-3.38774	6.87859e-76	8.77056e-74	1552	24793294	24793378	1717	0.416527	2.75391e-06	1.92942e-05	12122	24793122	24793195	48	-0.584728	0.0217667	0.0631739	305	24793017	24793087	18	0.309323	0.385738	0.572238	127	ENSG00000184924	-	PTRHD1	864.081	0.289711
chr2	27356184	27356555	27356184	27356287	27356438	27356555	27356122	27356193	28	-1.59778	0.00203977	0.00814136	81	27356269	27356353	67	0.388456	0.169348	0.322134	223	27356387	27356460	8	-3.46192	0.000356972	0.0016941	47	27356516	27356605	9	-0.540791	0.295761	0.478056	68	ENSG00000234072	+	ENSG00000234072	1130.59	0.663354
chr2	27356438	27356853	27356763	27356853	27356438	27356555	27356743	27356936	121	-0.0839072	0.638799	0.784996	765	27356714	27356798	310	-0.188712	0.13654	0.274078	1329	27356516	27356605	9	-0.540791	0.295761	0.478056	68	27356387	27356460	8	-3.46192	0.000356972	0.0016941	47	ENSG00000115207	-	GTF3C2	3480.45	-0.102996
chr2	27428476	27429182	27428476	27428630	27429024	27429182	27428423	27428513	21	0.108699	0.729518	0.846867	184	27428609	27428712	8819	0.605871	3.57495e-11	4.40029e-10	43572	27428954	27429132	58	1.53171	2.9197e-11	3.62012e-10	359	27429155	27429225	39	1.33361	0.000469422	0.00217919	116	ENSG00000115216	+	NRBP1	15027.5	0.615493
chr2	27663403	27663736	27663608	27663736	27663403	27663469	27663711	27663786	20	-0.244053	0.609769	0.762801	72	27663486	27663643	643	-0.152197	0.114546	0.240296	3512	27663423	27663506	14	0.42129	0.192366	0.352891	164	27663321	27663425	75	-0.544062	0.0145201	0.0449262	376	ENSG00000119760	-	SUPT7L	1337.23	-0.316139
chr2	28392627	28394781	28392627	28392857	28394671	28394781	28392574	28392745	42	2.66265	4.05554e-18	8.14538e-17	253	28392853	28393014	10838	1.36542	1.46672e-60	1.28755e-58	17307	28394623	28394681	87	4.02331	7.14185e-42	3.81874e-40	448	28394781	28394833	6	2.17934	0.0183508	0.0547604	22	ENSG00000075426	+	FOSL2	8095.21	1.36022
chr2	32010328	32010820	32010591	32010820	32010328	32010403	32010818	32010868	12	-0.380815	0.634328	0.781661	27	32010538	32010707	26	-0.6275	0.0416006	0.108088	215	32010403	32010456	4	0.822748	0.38351	0.569992	21	32010281	32010332	13	0.159894	0.786709	0.883191	49	ENSG00000162959	-	MEMO1	128.955	-0.178578
chr2	32010591	32011152	32011007	32011152	32010591	32010820	32011147	32011193	4	-0.360846	0.687912	0.819484	22	32010959	32011029	172	0.595158	0.00634013	0.0220264	422	32010818	32010868	12	-0.380815	0.634328	0.781661	27	32010538	32010707	26	-0.6275	0.0416006	0.108088	215	ENSG00000162959	-	MEMO1	128.955	-0.178578
chr2	38075702	38075939	38075702	38075726	38075833	38075939	38075657	38075704	9	0.489856	0.53147	0.702906	27	38075727	38075767	14	1.93447	0.0574862	0.140363	19	38075785	38075839	14	0.306996	0.674342	0.810081	29	38075939	38075989	9	2.20567	0.01731	0.0521421	22	ENSG00000232973	+	CYP1B1-AS1	126.012	2.14456
chr2	38075833	38076281	38076150	38076281	38075833	38075939	38076254	38076358	49	1.39172	6.82576e-07	5.2276e-06	243	38076103	38076157	1600	0.561524	1.1204e-05	7.10585e-05	2851	38075939	38075989	9	2.20567	0.01731	0.0521421	22	38075785	38075839	14	0.306996	0.674342	0.810081	29	ENSG00000138061	-	CYP1B1	7325.62	0.846251
chr2	43225914	43226657	43226603	43226657	43225914	43226063	43226657	43226709	15	2.27912	0.00295647	0.0113064	33	43226552	43226616	21510	0.900527	2.6088e-20	5.89988e-19	41463	43226046	43226115	44	0.837797	0.0142085	0.0441203	164	43225855	43225932	62	0.605071	0.0364764	0.0970163	220	ENSG00000152518	-	ZFP36L2	11457.5	0.940814
chr2	47905754	47906814	47906515	47906814	47905754	47905821	47906814	47906864	26	1.43542	0.025794	0.0728783	42	47906440	47906542	134	0.927088	2.63828e-14	4.14862e-13	1640	47905814	47905891	4	0.139228	0.806741	0.894879	51	47905709	47905764	7	-0.53443	0.242828	0.416536	87	ENSG00000138081	-	FBXO11	2968.73	0.361211
chr2	48314195	48315766	48315675	48315766	48314195	48314366	48315767	48315817	5	3.40863	0.00086744	0.00378776	27	48315625	48315681	17	0.54801	0.290675	0.472212	63	48314363	48314413	14	0.889538	0.0697203	0.163265	69	48314149	48314209	10	-1.41383	0.00493441	0.0176872	81	ENSG00000230773	-	ENSG00000230773	7.24678	0.0604686
chr2	61016947	61017497	61017430	61017497	61016947	61017103	61017491	61017574	7	-1.07017	0.0726912	0.168825	53	61017370	61017456	43	1.84051	6.81541e-08	5.93844e-07	166	61017089	61017264	18	2.80323	1.64721e-10	1.9096e-09	119	61016905	61016980	18	0.446565	0.385192	0.571655	61	ENSG00000162927	-	PUS10	281.472	1.35003
chr2	63840823	63841895	63840823	63840991	63841705	63841895	63840775	63840828	23	0.369925	0.437611	0.620641	86	63840950	63841180	1684	-0.506882	4.72212e-08	4.19758e-07	16984	63841662	63841710	4	-0.779246	0.311846	0.496567	33	63841887	63841946	70	-0.467949	0.100981	0.218075	256	ENSG00000169764	+	UGP2	3193.39	-0.577864
chr2	70086272	70086820	70086705	70086820	70086272	70086273	70086801	70086869	42	2.55766	2.43567e-09	2.52269e-08	135	70086632	70086720	110	1.59857	6.98059e-14	1.06692e-12	435	70086270	70086320	9	0.427023	0.684672	0.817413	14	70086222	70086290	35	-1.38511	0.00144951	0.0060046	107	ENSG00000179818	-	PCBP1-AS1	589.848	0.720477
chr2	70087342	70088360	70087342	70087481	70088207	70088360	70087266	70087384	15	0.0809443	0.865036	0.92877	81	70087461	70087902	3340	-0.151543	0.12756	0.260268	15419	70088157	70088234	69	3.52179	9.00964e-20	1.98086e-18	214	70088329	70088407	226	0.252084	0.199204	0.362022	530	ENSG00000169564	+	PCBP1	12855.6	0.0575646
chr2	70190716	70191123	70191003	70191123	70190716	70190778	70191121	70191171	9	-0.757737	0.436	0.619343	20	70190844	70191044	87	0.0647033	0.707484	0.832584	651	70190774	70190831	13	1.07702	0.168401	0.320737	26	70190638	70190741	50	-0.0620403	0.805619	0.894183	267	ENSG00000115998	-	C2orf42	458.029	0.303463
chr2	73112947	73113334	73112947	73113011	73113077	73113334	73112876	73112969	50	-0.926204	3.57133e-05	0.000206955	398	73112995	73113211	87	-0.34918	0.180631	0.337068	323	73113026	73113100	33	0.131314	0.773574	0.87516	83	73113335	73113382	15	-1.91144	0.0484486	0.122357	24	ENSG00000272702	+	ENSG00000272702	11.9313	-0.817926
chr2	74455513	74457677	74455513	74455848	74457529	74457677	74455465	74455516	7	-1.91463	0.091067	0.201403	18	74455848	74455895	13	-0.0492513	0.963938	0.9818	14	74457479	74457530	7	-0.592645	0.332132	0.517961	45	74457673	74457730	8	0.14277	0.840773	0.915722	36	ENSG00000115274	+	INO80B	28.6613	-0.109693
chr2	74502969	74503474	74503313	74503474	74502969	74503145	74503461	74503521	24	2.50452	1.35933e-05	8.50635e-05	63	74503264	74503351	141	1.41216	1.09692e-16	2.02378e-15	696	74503067	74503196	13	-1.36035	0.00339335	0.012759	93	74502920	74503060	22	-1.70354	8.20588e-05	0.000445074	122	ENSG00000179528	-	LBX2	215.259	0.851982
chr2	74529283	74529999	74529687	74529999	74529283	74529440	74529773	74530078	318	-0.778859	2.89017e-08	2.63848e-07	1340	74529625	74529723	4985	-0.0563379	0.535349	0.706279	25529	74529364	74529564	23	2.47309	1.94658e-13	2.87887e-12	223	74529236	74529290	6	0.0799746	0.904358	0.950644	36	ENSG00000115307	-	AUP1	5346.87	0.0287584
chr2	74958558	74959019	74958558	74958642	74958878	74959019	74958513	74958572	8	-1.94768	0.00826482	0.0276945	43	74958637	74958716	3281	-0.805549	8.67222e-21	2.00688e-19	14104	74958831	74958884	39	0.402235	0.422088	0.607135	62	74958993	74959079	21	-2.50042	2.46064e-10	2.8053e-09	194	ENSG00000115350	+	POLE4	1509.15	-0.86534
chr2	95165398	95165806	95165653	95165806	95165398	95165452	95165788	95165866	52	-0.235445	0.229163	0.399879	482	95165600	95165685	236	0.439557	0.00114842	0.00487757	1224	95165453	95165499	16	0.397938	0.555009	0.721911	36	95165337	95165413	34	-0.537015	0.137899	0.276183	137	ENSG00000144026	-	ZNF514	795.466	-0.302523
chr2	96208306	96209014	96208826	96209014	96208306	96208406	96208945	96209021	7	1.41388	0.0276227	0.0771658	42	96208776	96208833	1770	-0.654857	3.70946e-10	4.165e-09	4448	96208387	96208486	71	0.0940317	0.714138	0.83714	260	96208233	96208327	58	0.809726	1.25096e-05	7.87836e-05	552	ENSG00000084090	-	STARD7	7974.43	-0.451324
chr2	96869419	96870169	96870047	96870169	96869419	96869576	96870139	96870318	15	-1.01301	0.00693604	0.0238303	147	96869886	96870065	2567	-0.800666	3.82052e-17	7.27413e-16	7992	96869563	96869656	30	0.428364	0.0727262	0.168896	293	96869339	96869451	159	-0.526268	0.000328767	0.00157332	1122	ENSG00000168758	-	SEMA4C	7223.88	-0.763479
chr2	96870284	96870883	96870827	96870883	96870284	96870382	96870868	96870936	41	-0.998708	0.0160585	0.0489179	117	96870691	96870836	206	-0.98846	1.21086e-11	1.55329e-10	1151	96870378	96870451	123	-1.14444	1.07561e-05	6.84288e-05	319	96870207	96870297	32	0.364369	0.133449	0.269377	282	ENSG00000168758	-	SEMA4C	7223.88	-0.763479
chr2	97663529	97664293	97664007	97664293	97663529	97663621	97664243	97664333	31	0.518808	0.0452868	0.115892	252	97663923	97664027	760	0.374227	2.07253e-06	1.47988e-05	7023	97663611	97663671	24	0.187329	0.722928	0.842807	56	97663482	97663536	7	-1.21493	0.14889	0.292425	28	ENSG00000115073	-	ACTR1B	3265	0.231935
chr2	101387333	101387597	101387474	101387597	101387333	101387462	101387596	101387649	7	3.01074	0.000378921	0.00179042	35	101387419	101387487	250	1.14153	3.19954e-21	7.55944e-20	1763	101387371	101387514	12	6.92019	1.91727e-10	2.20741e-09	67	101387068	101387362	39	2.49417	8.94061e-35	3.81526e-33	714	ENSG00000175874	-	CREG2	662.14	1.89529
chr2	127701378	127701890	127701378	127701496	127701861	127701890	127701320	127701406	62	0.37972	0.212631	0.379626	190	127701491	127701569	198	0.419914	0.00634622	0.0220445	803	127701745	127701870	36	1.43096	9.98142e-07	7.4632e-06	217	127701885	127702022	16	-0.737657	0.0795073	0.181199	102	ENSG00000173349	+	SFT2D3	1216.88	0.370545
chr2	131093161	131093592	131093447	131093592	131093161	131093184	131093551	131093640	71	-0.674103	0.0103681	0.0336578	311	131093376	131093465	2053	0.497899	4.58502e-10	5.102e-09	20060	131093185	131093233	9	1.05567	0.261789	0.439704	18	131093084	131093184	40	0.392204	0.161465	0.310904	246	ENSG00000152102	-	FAM168B	8153.1	0.40059
chr2	156341620	156342557	156342502	156342557	156341620	156341812	156342554	156342774	28	0.182119	0.697392	0.825774	84	156342357	156342572	1493	0.946451	3.59009e-18	7.22944e-17	4534	156341807	156341943	90	-0.722223	0.00371486	0.0138185	334	156341564	156341622	13	-1.81069	0.0109091	0.0351427	46	ENSG00000153234	-	NR4A2	860.509	0.826829
chr2	157875839	157876158	157876103	157876158	157875839	157875938	157876155	157876221	8	3.7431	2.33496e-05	0.000139709	44	157876033	157876117	110	0.432652	0.0196173	0.0579038	604	157875917	157875994	7	1.23544	0.00152772	0.00629588	111	157875791	157875846	5	0.927898	0.0935931	0.205793	54	ENSG00000115170	-	ACVR1	1014.24	0.688706
chr2	158456725	158457916	158456725	158456951	158457681	158457916	158456657	158456738	50	-0.0479646	0.836097	0.912663	316	158456834	158457023	635	0.630883	8.35531e-13	1.18016e-11	4565	158457634	158457687	8	1.68651	0.0143923	0.0445943	37	158457903	158457963	4	0.89802	0.186733	0.345063	34	ENSG00000144283	+	PKP4	6552.19	0.480738
chr2	164840555	164841600	164841431	164841600	164840555	164840579	164841519	164841652	19	0.633513	0.108954	0.231209	113	164841148	164841534	1010	0.999183	1.21077e-33	4.93747e-32	6685	164840575	164840800	47	0.564451	0.0221286	0.0640725	286	164840509	164840559	5	0.728265	0.44832	0.6299	18	ENSG00000082438	-	COBLL1	3150.59	0.690398
chr2	173964721	173965507	173965304	173965507	173964721	173964875	173965481	173965583	26	-0.0775346	0.76626	0.870512	276	173965253	173965331	558	0.628536	2.30434e-09	2.39341e-08	2541	173964859	173964927	139	0.28146	0.178208	0.33389	468	173964675	173964775	26	0.253396	0.307457	0.491689	330	ENSG00000172845	-	SP3	4273.97	0.0859218
chr2	177212410	177213268	177212410	177212775	177213196	177213268	177212364	177212437	75	0.203997	0.459593	0.640185	254	177212672	177212939	3237	-0.436806	2.86459e-06	2.00149e-05	19503	177213137	177213305	21	0.463108	0.132868	0.268493	170	177213256	177213336	23	-0.229933	0.594332	0.751279	91	ENSG00000170144	+	HNRNPA3	4059.39	-0.401822
chr2	177264076	177264864	177264703	177264864	177264076	177264157	177264783	177264939	18	-0.0357694	0.915555	0.957011	165	177264644	177264736	2070	0.889922	1.50176e-30	5.44863e-29	13094	177264153	177264219	7	-0.361291	0.574847	0.736589	44	177264011	177264083	15	-0.116737	0.815568	0.900075	66	ENSG00000116044	-	NFE2L2	4752.71	0.950042
chr2	178450739	178451334	178451152	178451334	178450739	178450877	178451295	178451433	7	-1.71221	0.00489873	0.0175772	59	178451086	178451185	1176	-0.68038	1.70451e-13	2.53283e-12	8996	178450868	178450929	16	-0.193647	0.747169	0.857999	47	178450670	178450747	26	-2.213	2.21372e-10	2.53369e-09	235	ENSG00000180228	-	PRKRA	1316.34	-0.695651
chr2	189783992	189784488	189784334	189784488	189783992	189784114	189784469	189784565	59	-1.41347	3.89061e-16	6.89511e-15	853	189784263	189784366	1266	-0.332995	0.000210587	0.00104811	7186	189784061	189784145	13	-0.599682	0.187006	0.34544	86	189783960	189784054	65	-0.477482	0.0244614	0.0697592	489	ENSG00000128699	-	ORMDL1	1174.62	-0.360809
chr2	191245232	191246307	191245232	191245403	191246194	191246307	191245217	191245305	73	1.55923	3.65364e-12	4.90183e-11	390	191245393	191245491	11420	1.27109	3.10504e-67	3.22466e-65	78945	191246039	191246196	27	0.854187	5.91628e-06	3.93399e-05	524	191246182	191246375	166	2.04711	6.63571e-24	1.79851e-22	540	ENSG00000128641	+	MYO1B	23998.5	1.13055
chr2	197453257	197454004	197453257	197453551	197453894	197454004	197453192	197453270	13	0.458599	0.29483	0.477038	88	197453431	197453603	3719	0.746729	2.94103e-17	5.63642e-16	18753	197453814	197453901	120	3.91947	1.01018e-44	5.88942e-43	482	197453988	197454054	58	3.62279	1.15842e-15	1.99568e-14	153	ENSG00000115520	+	COQ10B	2589.81	0.753662
chr2	199457491	199459514	199459349	199459514	199457491	199457635	199459515	199459566	6	-3.57485	0.00456746	0.0165467	20	199459214	199459377	116	-0.354373	0.0236892	0.0679144	1013	199457628	199457746	6	-2.76	5.76e-05	0.000321553	71	199457442	199457496	3	-3.11502	0.00869119	0.0289225	25	ENSG00000119042	-	SATB2	504.855	-0.377011
chr2	200889153	200889822	200889153	200889438	200889722	200889822	200889006	200889323	153	-0.83359	1.03025e-12	1.44385e-11	2115	200889391	200889490	246	-1.38032	1.21766e-23	3.25851e-22	1977	200889672	200889724	5	-0.0717464	0.931045	0.96471	26	200889817	200889870	14	-0.453647	0.411552	0.597638	59	ENSG00000196290	+	NIF3L1	1065.9	-1.00092
chr2	202912148	202912567	202912148	202912274	202912486	202912567	202912097	202912193	39	-0.942997	0.00216134	0.0085663	207	202912259	202912336	100	-0.777506	0.00123859	0.0052191	336	202912435	202912495	9	0.715849	0.251821	0.427984	40	202912568	202912617	9	-0.158305	0.882647	0.938884	15	ENSG00000138380	+	CARF	182.3	-0.529577
chr2	203238899	203239340	203238899	203239017	203239241	203239340	203238851	203238910	7	-1.75542	0.00482128	0.017336	59	203238989	203239069	260	-0.423912	0.00501637	0.0179543	895	203239160	203239247	161	-0.339984	0.0489572	0.123416	628	203239338	203239404	20	-0.648596	0.199275	0.362076	71	ENSG00000119004	+	CYP20A1	694.996	-0.345245
chr2	206085176	206085604	206085176	206085330	206085589	206085604	206085152	206085272	27	-1.31808	4.4518e-05	0.000253716	210	206085228	206085438	135	-0.087425	0.620537	0.771131	716	206085540	206085617	10	0.0249947	0.959204	0.979351	69	206085600	206085657	14	-0.166729	0.718529	0.840071	78	ENSG00000227946	+	ENSG00000227946	181.433	-0.179231
chr2	212537631	212539454	212539252	212539454	212537631	212537794	212539455	212539506	10	-2.4717	0.0589517	0.143152	17	212539094	212539290	2355	-0.0887397	0.307201	0.491429	6205	212537788	212537846	6	1.48554	0.0732024	0.169829	25	212537529	212537634	16	2.81027	7.19381e-10	7.85806e-09	113	ENSG00000178568	-	ERBB4	2107.12	1.08868
chr2	218217073	218217767	218217073	218217188	218217641	218217767	218216913	218217096	34	0.861587	0.001613	0.00660801	289	218217149	218217245	14339	0.852838	3.38179e-24	9.30609e-23	55191	218217582	218217649	16	1.38422	0.00275797	0.0106387	83	218217764	218217821	3	5.31844	1.25467e-05	7.90052e-05	22	ENSG00000163466	+	ARPC2	11746.8	0.921493
chr2	218398103	218398766	218398103	218398232	218398547	218398766	218398052	218398107	5	-2.89735	0.0333408	0.0901632	13	218398225	218398285	46	-2.09995	9.68206e-07	7.25219e-06	141	218398499	218398550	20	-1.17809	0.0729404	0.169328	44	218398624	218398814	13	-1.80118	1.85083e-07	1.53333e-06	202	ENSG00000144579	+	CTDSP1	3867.39	-0.0783955
chr2	218399801	218400574	218399801	218399869	218400472	218400574	218399606	218399931	53	-0.736039	0.00111235	0.00474269	396	218399620	218399941	261	0.727344	3.1893e-10	3.60201e-09	1972	218400414	218400476	3	-1.86558	0.0215215	0.0625548	35	218400572	218400642	15	-2.22353	3.30611e-07	2.64789e-06	137	ENSG00000144579	+	CTDSP1	3867.39	-0.0783955
chr2	218659340	218659719	218659607	218659719	218659340	218659362	218659684	218659866	253	-1.13272	6.53063e-17	1.22059e-15	1496	218659459	218659632	332	-1.09057	2.66859e-20	6.03188e-19	2158	218659353	218659413	13	-0.0150862	0.987064	0.993197	21	218659288	218659361	62	0.0464405	0.807678	0.895413	475	ENSG00000115568	-	ZNF142	1836.83	-0.756699
chr2	219597750	219598235	219597750	219597867	219598185	219598235	219597666	219597763	19	0.231769	0.471302	0.650821	162	219597836	219597921	643	-0.156941	0.153309	0.299006	3140	219598028	219598191	13	2.07799	2.51348e-05	0.000149591	82	219598233	219598287	10	-1.98692	0.0138046	0.0430622	37	ENSG00000144589	+	STK11IP	2171.84	-0.13462
chr2	226794588	226795804	226795675	226795804	226794588	226794674	226795789	226795857	23	0.384205	0.31642	0.501671	107	226795624	226795709	145	0.676411	0.000285228	0.00138289	598	226794675	226794726	10	-1.37756	0.19161	0.35187	18	226794542	226794590	16	-0.957295	0.264559	0.442783	25	ENSG00000169047	-	IRS1	10108.4	0.607305
chr2	229921324	229922301	229921994	229922301	229921324	229921456	229922301	229922349	11	0.236734	0.743662	0.855824	30	229921929	229922217	1177	0.199187	0.0161567	0.0491497	11827	229921455	229921507	10	-0.34119	0.665854	0.804297	27	229921287	229921377	27	-0.0856898	0.742686	0.855146	267	ENSG00000153827	-	TRIP12	9824.86	0.218385
chr2	231464184	231464762	231464483	231464762	231464184	231464205	231464739	231464832	106	-0.147108	0.49755	0.674539	371	231464432	231464500	20440	-0.591997	1.92727e-13	2.8518e-12	32476	231464197	231464272	10	-0.150882	0.790319	0.885357	55	231464114	231464214	60	-1.11102	3.89227e-06	2.6647e-05	365	ENSG00000115053	-	NCL	35188.5	-0.647122
chr2	231708360	231709030	231708360	231708529	231708828	231709030	231708310	231708365	85	2.01587	3.15519e-09	3.23175e-08	167	231708521	231708582	196809	-0.840948	1.59704e-23	4.25221e-22	366451	231708782	231708835	5	1.3348	0.172294	0.326045	17	231708750	231709079	101	-1.43212	1.95962e-16	3.54805e-15	787	ENSG00000187514	+	PTMA	21065.6	-0.745829
chr2	231708828	231710505	231708828	231709030	231710276	231710505	231708782	231708835	5	1.3348	0.172294	0.326045	17	231708750	231709079	101	-1.43212	1.95962e-16	3.54805e-15	787	231710224	231710377	68	1.89134	3.83846e-16	6.8041e-15	396	231710481	231710566	20	-0.00636749	0.98324	0.991095	192	ENSG00000187514	+	PTMA	21065.6	-0.745829
chr2	232550556	232551089	232550556	232550700	232550971	232551089	232550445	232550581	97	-0.33464	0.0366491	0.0973898	869	232550666	232550749	2577	-0.0644376	0.451195	0.632499	16311	232550920	232550994	11	1.65234	0.000540586	0.00247799	77	232551064	232551156	33	-0.946639	0.00628155	0.0218472	165	ENSG00000135930	+	EIF4E2	4093.12	0.022863
chr2	237484097	237485496	237484097	237484225	237485434	237485496	237484049	237484109	54	2.07795	3.14689e-06	2.18555e-05	96	237484218	237484301	163	2.28609	3.29528e-43	1.85219e-41	908	237485389	237485443	6	2.48292	0.000200445	0.001002	47	237485388	237485659	58	0.984838	2.49926e-07	2.03327e-06	495	ENSG00000115648	+	MLPH	36943	1.22992
chr2	237487147	237488550	237487147	237487250	237488422	237488550	237487007	237487183	7330	2.07011	8.9975e-166	5.24561e-163	53248	237487243	237487334	15206	1.11125	3.49909e-38	1.6646e-36	43559	237488251	237488429	50	1.51352	2.75144e-15	4.63062e-14	525	237488532	237488628	41	0.623623	0.0471626	0.119739	172	ENSG00000115648	+	MLPH	36943	1.22992
chr2	240454696	240456812	240456699	240456812	240454696	240454944	240456807	240456881	23	-0.689915	0.125003	0.256488	101	240456446	240456719	710	0.427908	7.0528e-05	0.000387833	3488	240454824	240455097	56	1.35565	1.11629e-06	8.29377e-06	248	240454647	240454697	10	0.738189	0.554802	0.721758	11	ENSG00000218416	-	ENSG00000218416	1052.62	0.239335
chr2	240560773	240561309	240561039	240561309	240560773	240560828	240561280	240561378	97	1.29938	3.36607e-08	3.04956e-07	330	240560975	240561070	287	0.311941	0.0378673	0.100033	902	240560812	240560959	69	-0.430519	0.0173014	0.0521183	629	240560706	240560782	27	0.0638967	0.811626	0.897783	236	ENSG00000144504	-	ANKMY1	680.327	-0.0256985
chr2	240568367	240568857	240568367	240568494	240568728	240568857	240568305	240568396	9	0.337093	0.424809	0.609157	92	240568409	240568623	347	-0.211078	0.0972677	0.212076	2235	240568654	240568904	24	1.20902	3.05543e-06	2.12773e-05	254	240568837	240568930	30	-0.511025	0.101774	0.219429	187	ENSG00000142327	+	RNPEPL1	2531.47	-0.163625
chr2	241315224	241315934	241315671	241315934	241315224	241315358	241315896	241315989	665	-0.0932448	0.36709	0.55324	6118	241315632	241315734	4239	0.775658	1.19816e-25	3.51692e-24	13726	241315266	241315494	137	1.0501	2.59962e-16	4.6708e-15	1743	241315133	241315232	2852	0.485231	5.47394e-09	5.45496e-08	16524	ENSG00000115677	-	HDLBP	30659.3	0.288632
chr20	297501	298369	297501	297572	298282	298369	297455	297503	10	4.72975	0.00024737	0.0012138	15	297491	297626	786	-0.311863	0.00209386	0.00832973	4034	298213	298305	390	3.14349	2.09096e-70	2.36628e-68	1022	298367	298419	7	1.2883	0.16715	0.319045	20	ENSG00000247315	+	ZCCHC3	1126.25	-0.266487
chr20	325268	325902	325268	325551	325783	325902	325215	325280	96	-0.426691	0.0224296	0.0648	544	325535	325630	967	-0.518726	5.67683e-06	3.78616e-05	4298	325733	325804	11	-1.35714	0.0390653	0.102678	48	325867	325974	213	-1.93259	1.56519e-63	1.48169e-61	2498	ENSG00000177732	+	SOX12	2606.4	-0.937853
chr20	3820469	3820817	3820469	3820555	3820690	3820817	3820391	3820491	46	-0.146309	0.539288	0.709649	313	3820534	3820636	685	-0.0165435	0.86022	0.926298	3306	3820639	3820696	2	-0.998279	0.275761	0.455387	22	3820811	3820898	8	-0.841825	0.0879168	0.196026	74	ENSG00000125843	+	AP5S1	1285.22	0.0766978
chr20	5119385	5120188	5119957	5120188	5119385	5119582	5120166	5120252	69	4.52977	3.9967e-25	1.14531e-23	257	5119881	5119965	6905	0.652382	7.96898e-14	1.21228e-12	24159	5119550	5119631	6	-0.207534	0.726225	0.844943	49	5119337	5119392	8	-0.279494	0.649387	0.79232	50	ENSG00000132646	-	PCNA	10644.5	0.649922
chr20	9068612	9069142	9068612	9068734	9069091	9069142	9068560	9068617	12	1.08497	0.0592496	0.14371	50	9068664	9068769	223	0.743871	2.02245e-09	2.11335e-08	1781	9069044	9069096	14	0.104416	0.89185	0.943844	27	9069139	9069192	4	-1.95728	0.0873307	0.194997	19	ENSG00000101333	+	PLCB4	1014.72	0.55405
chr20	17968510	17968942	17968793	17968942	17968510	17968612	17968914	17969143	656	0.415757	2.72058e-06	1.90829e-05	5817	17968742	17968800	8019	-0.426824	4.28695e-08	3.83128e-07	13423	17968579	17968660	10	-0.340166	0.487483	0.665662	70	17968425	17968535	757	-0.848457	1.24667e-13	1.87059e-12	2693	ENSG00000089006	-	SNX5	4239.53	-0.730614
chr20	17969519	17970050	17969519	17969550	17969945	17970050	17969466	17969532	3	-0.842703	0.323879	0.509774	28	17969545	17969618	20	-1.03636	0.00951424	0.0312809	124	17969895	17969968	10	0.189513	0.719952	0.840844	61	17969952	17970099	15	-0.99307	0.0253787	0.0719212	104	ENSG00000125871	+	MGME1	2246.61	0.100746
chr20	19757529	19758064	19757529	19757663	19757960	19758064	19757452	19757536	8	2.3688	0.000104808	0.000556851	54	19757598	19757865	140	1.38763	4.05412e-22	1.00504e-20	1097	19757880	19758148	38	0.868696	0.000151139	0.000775944	366	19758044	19758117	20	0.748338	0.0103714	0.0336657	198	ENSG00000132669	+	RIN2	686.345	1.53409
chr20	21303253	21303825	21303253	21303342	21303762	21303825	21303180	21303274	68	1.56651	6.94882e-14	1.06225e-12	439	21303304	21303404	2374	0.147112	0.143052	0.2839	11657	21303621	21303778	77	-0.210799	0.309459	0.493929	500	21303787	21303878	14	0.579442	0.152831	0.298376	101	ENSG00000088930	+	XRN2	6622.52	0.106162
chr20	25390414	25391001	25390834	25391001	25390414	25390530	25390975	25391052	11	-0.473471	0.350405	0.536083	65	25390765	25390848	2563	0.125264	0.125477	0.257141	16521	25390519	25390581	38	0.0531009	0.899535	0.94779	96	25390364	25390416	10	1.37363	0.0812909	0.184409	29	ENSG00000100997	-	ABHD12	4716.85	-0.0429207
chr20	25623745	25624137	25624013	25624137	25623745	25623869	25624005	25624205	101	0.424923	0.00361077	0.0134746	883	25623920	25624086	340	-0.379785	0.000572927	0.00260926	2878	25623866	25623928	13	1.45694	0.00352402	0.0131946	70	25623681	25623757	47	1.63593	9.90798e-11	1.1744e-09	292	ENSG00000170191	-	NANP	533.629	-0.186237
chr20	25696540	25696908	25696852	25696908	25696540	25696622	25696897	25696958	3	1.42079	0.188299	0.34717	15	25696698	25696877	462	1.40545	5.50324e-39	2.69694e-37	2322	25696619	25696680	13	3.74556	1.37473e-06	1.00793e-05	56	25696496	25696568	414	4.70263	4.16434e-77	5.45793e-75	890	ENSG00000130684	-	ZNF337	2858.34	2.15918
chr20	31722548	31722962	31722867	31722962	31722548	31722662	31722927	31723017	29	1.75699	3.42216e-06	2.36184e-05	124	31722814	31723003	1641	2.35985	5.77651e-161	3.19165e-158	8313	31722645	31722819	87	1.95889	1.27454e-18	2.62792e-17	421	31722486	31722570	324	2.92006	1.42883e-73	1.74801e-71	1366	ENSG00000171552	-	BCL2L1	10330.8	2.27742
chr20	45416039	45416629	45416039	45416140	45416386	45416629	45415991	45416059	8	0.28587	0.653392	0.795254	45	45416129	45416191	7883	0.00903622	0.927375	0.963109	18030	45416335	45416387	13	-0.733076	0.236965	0.409143	45	45416629	45416676	77	-0.290317	0.523418	0.696299	90	ENSG00000124155	+	PIGT	4004.99	-0.014714
chr20	47356698	47357650	47357578	47357650	47356698	47356886	47357634	47357798	42	-0.22027	0.415515	0.601456	266	47357494	47357612	855	-1.02386	2.27468e-24	6.31295e-23	3153	47356873	47356945	64	-0.42875	0.127705	0.260494	265	47356646	47356720	394	-1.49964	9.72587e-36	4.30014e-34	1987	ENSG00000101040	-	ZMYND8	3947.25	-0.815904
chr20	47501762	47502453	47501762	47501886	47502436	47502453	47501684	47501790	82	-0.551215	0.00563482	0.0198775	573	47501858	47501965	32871	0.3447	1.38452e-06	1.01467e-05	129666	47502384	47502446	5	1.06454	0.312645	0.497548	15	47502453	47502500	9	0.12605	0.843302	0.917187	40	ENSG00000124151	+	NCOA3	44410.6	0.19321
chr20	49046180	49046854	49046180	49046316	49046683	49046854	49046116	49046187	20	0.887706	0.0392663	0.103123	98	49046277	49046390	1921	-0.468196	6.97073e-06	4.58083e-05	12027	49046621	49046708	59	0.523803	0.0842102	0.18952	175	49046835	49046920	36	2.15529	3.38313e-08	3.06396e-07	131	ENSG00000124207	+	CSE1L	14324.7	-0.50677
chr20	49812732	49813160	49812732	49812899	49813041	49813160	49812686	49812735	8	0.08708	0.933682	0.965715	16	49812863	49812955	119	0.124361	0.39406	0.580778	1000	49812973	49813061	5	2.53987	2.05124e-05	0.000124126	59	49813141	49813208	5	1.14084	0.0854241	0.191641	37	ENSG00000197818	+	SLC9A8	1469.13	0.578709
chr20	53593574	53593913	53593804	53593913	53593574	53593604	53593877	53594040	82	1.31288	2.85482e-10	3.24027e-09	469	53593752	53593819	11912	0.706089	3.92936e-20	8.80393e-19	29694	53593581	53593649	8	-0.822384	0.139816	0.279176	62	53593471	53593598	50	0.227747	0.305758	0.489743	377	ENSG00000171940	-	ZNF217	30166.8	0.917175
chr20	56629062	56630230	56629062	56629305	56630036	56630230	56629015	56629126	24	0.489871	0.271004	0.450029	78	56629299	56629358	24886	0.357153	8.29337e-06	5.37603e-05	38485	56629989	56630039	7	-0.0115831	0.986146	0.992734	38	56630177	56630282	295	0.106575	0.298521	0.481275	2986	ENSG00000087510	+	TFAP2C	5150.18	0.204803
chr20	57266390	57266820	57266640	57266820	57266390	57266439	57266792	57266870	6	1.16699	0.0569469	0.139296	46	57266563	57266669	1388	-0.166376	0.0527326	0.131093	7894	57266413	57266511	47	2.13344	2.90181e-10	3.29006e-09	182	57266312	57266401	950	0.122969	0.163389	0.313559	8454	ENSG00000101144	-	BMP7	15989.5	-0.243065
chr20	58692698	58693204	58692698	58692864	58693100	58693204	58692629	58692722	27	1.2228	1.97287e-05	0.000119786	260	58692764	58692935	2688	0.0972724	0.281412	0.461519	31108	58693055	58693101	5	1.62027	0.0620194	0.148925	23	58693184	58693252	18	0.444164	0.259833	0.437503	105	ENSG00000215440	+	NPEPL1	3358.75	0.191175
chr20	58891267	58891577	58891267	58891420	58891551	58891577	58891143	58891278	16	-0.598618	0.153057	0.298694	103	58891314	58891472	68519	-0.269982	0.0210237	0.0613441	102705	58891433	58891557	7	-1.15241	0.135493	0.27241	39	58891562	58891716	7894	-0.0560237	0.422442	0.607465	34299	ENSG00000087460	+	GNAS	64269	-0.141258
chr20	58891551	58891994	58891551	58891577	58891807	58891994	58891433	58891557	7	-1.15241	0.135493	0.27241	39	58891562	58891716	7894	-0.0560237	0.422442	0.607465	34299	58891737	58891824	18	-0.0212219	0.958219	0.978764	124	58891989	58892124	11	-0.669113	0.107756	0.22936	100	ENSG00000087460	+	GNAS	64269	-0.141258
chr20	62302793	62304115	62302793	62302996	62304026	62304115	62302655	62302817	62	1.45692	8.03864e-15	1.31062e-13	578	62302953	62303060	9798	0.733177	8.09847e-15	1.31986e-13	53939	62303891	62304031	11	4.18529	1.98151e-11	2.49009e-10	103	62304043	62304194	181	5.95657	4.40062e-47	2.75563e-45	663	ENSG00000130706	+	ADRM1	24833.3	0.891261
chr20	62304026	62304469	62304026	62304115	62304433	62304469	62303891	62304031	11	4.18529	1.98151e-11	2.49009e-10	103	62304043	62304194	181	5.95657	4.40062e-47	2.75563e-45	663	62304362	62304469	46	8.01429	2.5236e-14	3.98087e-13	144	62304459	62304625	95	2.63948	7.34915e-29	2.49105e-27	419	ENSG00000130706	+	ADRM1	24833.3	0.891261
chr20	62386966	62387870	62386966	62387103	62387680	62387870	62386903	62386997	828	0.779153	1.64992e-15	2.8183e-14	4609	62387011	62387144	28018	-0.0730225	0.460442	0.64104	106591	62387634	62387744	9	-0.966537	0.175005	0.329772	36	62387863	62387922	3	-0.373239	0.598496	0.754379	35	ENSG00000171858	+	RPS21	14282.5	0.226197
chr20	62926208	62926635	62926515	62926635	62926208	62926280	62926619	62926709	117	0.838951	6.42544e-05	0.000355951	404	62926437	62926616	508	0.508437	1.23923e-07	1.04802e-06	4599	62926274	62926348	10	1.62987	0.00357225	0.0133521	57	62926162	62926209	15	1.22014	0.0990808	0.215059	30	ENSG00000101191	-	DIDO1	10679.6	0.398467
chr20	62937895	62939982	62937895	62938149	62939956	62939982	62937832	62937929	496	0.217875	0.0123733	0.0391786	4979	62938034	62938228	2893	0.380211	3.80862e-06	2.61136e-05	19367	62939905	62939957	8	5.13972	7.96224e-06	5.17925e-05	33	62939982	62940029	11	-0.252258	0.796344	0.888709	18	ENSG00000101193	+	GID8	12024.7	0.319289
chr20	63498179	63499390	63499134	63499390	63498179	63498267	63499389	63499437	3	-0.680398	0.440952	0.623318	22	63499031	63499293	1267	-0.890579	6.48527e-32	2.49881e-30	15386	63498264	63498318	6	-1.00198	0.210996	0.377601	29	63498133	63498186	5	-0.949147	0.285098	0.465787	25	ENSG00000101210	-	EEF1A2	39641.4	-0.385572
chr20	63520621	63521221	63520621	63520764	63521129	63521221	63520542	63520651	51	0.45873	0.0479339	0.121296	329	63520750	63520819	145491	0.619635	2.67324e-17	5.14187e-16	243859	63520993	63521144	268	2.69813	5.09174e-54	3.81592e-52	1081	63521201	63521366	601	0.742165	4.34845e-12	5.79537e-11	3370	ENSG00000125534	+	PPDPF	27551.3	0.431915
chr20	63626728	63627217	63627064	63627217	63626728	63626856	63627145	63627283	736	0.571821	9.09871e-10	9.83591e-09	4585	63626992	63627094	914	1.01993	8.26112e-28	2.66652e-26	8117	63626849	63627025	128	0.46128	0.00362939	0.0135363	786	63626676	63626833	54	-0.70333	0.00227138	0.00894999	426	ENSG00000101216	-	GMEB2	3181.35	0.827742
chr20	63707906	63708847	63707906	63708038	63708596	63708847	63707857	63708044	622	-0.0892313	0.365467	0.551444	8482	63708026	63708215	2704	0.298442	0.000704157	0.00314078	8466	63708529	63708673	17	3.39066	2.31736e-09	2.40604e-08	89	63708735	63708985	21	0.361666	0.30396	0.487508	136	ENSG00000197114	+	ZGPAT	1790.35	0.534251
chr20	63740187	63741367	63740187	63740288	63741216	63741367	63740141	63740190	8	0.0318268	0.970943	0.984948	23	63740234	63740307	700	-1.32167	1.61742e-44	9.37792e-43	4121	63741165	63741224	36	-1.38604	0.00026743	0.0013034	147	63741247	63741441	91	-1.04374	1.7629e-05	0.000108133	350	ENSG00000125520	+	SLC2A4RG	8072.64	-0.783255
chr20	63865028	63865975	63865028	63865269	63865873	63865975	63864869	63865054	733	0.133733	0.170137	0.323192	4145	63865251	63865339	7362	0.0771195	0.324663	0.510588	26678	63865823	63865900	972	-0.417384	0.000612993	0.00277309	1972	63865962	63866104	33	-1.57515	6.31466e-07	4.85994e-06	219	ENSG00000101150	+	TPD52L2	14054.2	-0.285687
chr21	15063963	15065158	15064987	15065158	15063963	15064055	15065128	15065310	241	1.88192	2.80398e-25	8.09554e-24	639	15064928	15065014	15831	0.65746	1.00319e-17	1.97177e-16	49717	15064056	15064106	7	0.0409198	0.969192	0.984338	16	15063918	15063969	8	0.864968	0.360503	0.546128	21	ENSG00000180530	-	NRIP1	8024.79	0.602504
chr21	25607294	25607545	25607480	25607545	25607294	25607341	25607545	25607593	5	0.537069	0.509554	0.684871	23	25607428	25607513	1655	0.846553	3.21611e-17	6.15384e-16	4421	25607331	25607388	4	4.53444	0.000677101	0.00303351	13	25607245	25607298	4	5.8136	4.89376e-07	3.8263e-06	31	ENSG00000154719	-	MRPL39	1035.9	0.728434
chr21	31559086	31559629	31559086	31559234	31559433	31559629	31559017	31559094	145	-1.39962	3.36316e-09	3.43409e-08	392	31559215	31559303	153	-2.10485	1.04919e-32	4.16602e-31	1062	31559387	31559435	11	-2.06683	0.0166375	0.0504037	33	31559597	31559648	4	-4.60069	0.000179211	0.000905275	24	ENSG00000237594	+	ENSG00000237594	52.8295	-2.07412
chr21	31659523	31660149	31659523	31659692	31660023	31660149	31659476	31659533	3	-2.62656	0.0123844	0.0392062	27	31659685	31659746	11272	-0.117094	0.255572	0.432576	43968	31659959	31660027	5	2.37309	0.00169464	0.00690432	35	31660146	31660227	7	-0.240509	0.675591	0.810901	51	ENSG00000142168	+	SOD1	5774.21	-0.225119
chr21	36320120	36320576	36320120	36320196	36320474	36320576	36320040	36320138	16	0.640592	0.116067	0.242681	96	36320183	36320274	253	0.896254	5.69928e-13	8.15908e-12	1386	36320429	36320479	7	3.32243	0.000296602	0.00143302	33	36320567	36320625	7	2.075	0.00606092	0.0211879	34	ENSG00000159256	+	MORC3	1345.41	0.981444
chr21	36966375	36966799	36966668	36966799	36966375	36966458	36966799	36966878	10	-0.162862	0.791838	0.885985	42	36966492	36966731	105	0.00136427	0.992856	0.996433	1089	36966434	36966540	80	-0.972233	0.000285925	0.00138579	280	36966324	36966406	49	-0.924105	4.79369e-05	0.000271626	377	ENSG00000159267	-	HLCS	1057.48	-0.420447
chr21	37367008	37367418	37367008	37367027	37367336	37367418	37366972	37367021	6	2.45125	0.0155542	0.0476134	21	37367006	37367073	395	0.860623	1.12013e-06	8.31938e-06	779	37367293	37367347	8	1.58636	0.053786	0.133155	26	37367402	37367467	28	-0.576009	0.284882	0.46553	59	ENSG00000157540	+	DYRK1A	2221.77	0.600766
chr21	42009976	42010486	42010356	42010486	42009976	42010096	42010475	42010555	219	1.00848	2.60275e-08	2.38899e-07	593	42010308	42010376	735	0.612922	1.30094e-07	1.09735e-06	3242	42010095	42010143	19	1.44039	0.0282954	0.0787353	46	42009903	42009984	121	0.720756	6.95673e-05	0.000382899	654	ENSG00000173276	-	ZBTB21	1885.54	0.769213
chr21	42364599	42366872	42366534	42366872	42364599	42364790	42366872	42366921	7	1.2868	0.238207	0.410651	14	42366480	42366541	414612	0.338411	0.000143034	0.000738504	655060	42364442	42364840	33	0.016203	0.936085	0.967167	438	42364551	42364600	9	-0.113448	0.824242	0.905409	64	ENSG00000160182	-	TFF1	42940.7	0.218644
chr21	42878939	42879643	42879533	42879643	42878939	42879133	42879617	42879729	116	0.602673	0.000440633	0.00205741	795	42879474	42879572	961	-0.670561	3.2791e-14	5.12387e-13	5902	42879096	42879177	67	-1.7943	1.18199e-20	2.7182e-19	697	42878891	42878940	2	-4.42308	0.000399875	0.00188123	21	ENSG00000160193	-	WDR4	1342.92	-0.732742
chr21	44299980	44300490	44299980	44300088	44300371	44300490	44299911	44299994	8	-0.659683	0.28442	0.465035	46	44300044	44300138	2602	-0.140656	0.112767	0.237414	19353	44300324	44300373	7	1.24432	0.14024	0.279782	25	44300465	44300537	5	2.6716	0.000943219	0.00408504	35	ENSG00000141959	+	PFKL	14779.7	-0.184561
chr21	44339065	44339456	44339383	44339456	44339065	44339121	44339346	44339596	37	0.0929473	0.663732	0.802774	402	44339182	44339405	350	0.452526	9.91962e-07	7.41962e-06	3764	44339108	44339192	96	2.44293	8.34269e-33	3.32199e-31	558	44339018	44339079	3	-0.0501378	0.96952	0.984438	12	ENSG00000160226	-	CFAP410	896.991	0.402223
chr21	45404984	45405687	45404984	45405164	45405581	45405687	45404907	45405004	43	-0.612585	0.0649947	0.154519	158	45405140	45405218	2963	0.316271	6.87742e-05	0.000378854	10756	45405527	45405609	38	-0.345179	0.123747	0.254699	366	45405674	45405764	39	1.13957	2.37903e-08	2.19436e-07	569	ENSG00000182871	+	COL18A1	10944.1	0.417536
chr21	45541837	45542535	45542428	45542535	45541837	45541919	45542497	45542582	15	-0.394819	0.49586	0.672874	63	45542369	45542456	1622	-1.27705	3.79213e-45	2.24019e-43	7174	45541915	45541961	10	-2.4668	0.0220099	0.0637812	25	45541653	45541860	82	-2.34797	2.76347e-16	4.95782e-15	341	ENSG00000173638	-	SLC19A1	1887.46	-1.46474
chr22	28741819	28742680	28741819	28742077	28742558	28742680	28741755	28741834	985	-0.71418	5.05596e-13	7.25777e-12	4525	28742037	28742129	1671	-0.383166	1.40345e-06	1.02765e-05	6239	28742508	28742565	6	-0.530905	0.486153	0.664437	29	28742664	28742730	98	-1.27483	8.21812e-08	7.0876e-07	380	ENSG00000100209	+	HSCB	678.776	-0.498718
chr22	28798298	28800729	28800565	28800729	28798298	28798411	28800715	28801023	66	0.153627	0.262763	0.440705	1127	28800401	28800587	94964	-0.885277	7.34731e-16	1.28197e-14	272839	28798405	28798490	14	-1.63588	0.00797061	0.0268405	57	28798216	28798363	25	-1.5332	1.19937e-05	7.57379e-05	196	ENSG00000100219	-	XBP1	31352.7	-1.00005
chr22	30246090	30246933	30246090	30246189	30246758	30246933	30246033	30246114	10	3.56644	7.47449e-09	7.32171e-08	80	30246068	30246415	4620	6.0222	9.61844e-152	4.34815e-149	7706	30246711	30246763	170	3.02627	1.25528e-18	2.58947e-17	216	30246929	30246981	6	4.52589	0.0011102	0.00473449	13	ENSG00000268812	+	LIF-AS2	1174.72	6.50692
chr22	31345879	31346876	31346573	31346876	31345879	31346154	31346733	31346929	80	-2.55113	3.47609e-50	2.37362e-48	1221	31346462	31346577	671	-1.51762	4.84668e-23	1.26106e-21	1130	31346003	31346256	95	0.789793	1.78472e-05	0.000109344	589	31345867	31345986	72	-0.376811	0.119729	0.248463	316	ENSG00000100105	-	PATZ1	2395.13	-1.78002
chr22	37018881	37019541	37019446	37019541	37018881	37019078	37019534	37019606	32	-0.295493	0.450082	0.631463	118	37019400	37019465	2297	0.508138	5.76221e-07	4.46238e-06	3554	37019043	37019127	19	-1.10884	0.00506628	0.0181107	127	37018831	37018903	35	0.0247009	0.938775	0.9688	181	ENSG00000128311	-	TST	2032.3	0.37428
chr22	38755445	38756200	38755979	38756200	38755445	38755597	38756150	38756243	15	-1.3033	7.22699e-05	0.000396191	195	38755928	38756009	648	-0.753664	8.49188e-15	1.38265e-13	3455	38755593	38755644	7	-0.0100602	0.988021	0.993734	41	38755395	38755453	7	0.532841	0.498672	0.675573	25	ENSG00000100242	-	SUN2	1672	-0.738137
chr22	41832872	41833835	41832872	41833110	41833751	41833835	41832795	41832885	13	2.89982	5.07989e-07	3.96595e-06	72	41833095	41833314	955	0.938142	7.76885e-31	2.86414e-29	8897	41833701	41833756	13	1.68665	0.00627624	0.0218296	45	41833812	41833874	4	0.147366	0.864352	0.928449	22	ENSG00000198911	+	SREBF2	7232.87	0.873646
chr22	41946737	41947264	41947133	41947264	41946737	41946948	41947234	41947295	4	-2.64882	0.0111217	0.0357254	28	41947073	41947160	841	-3.08878	3.09842e-131	1.01523e-128	5604	41946946	41947056	61	-2.20943	3.72234e-09	3.78348e-08	186	41946693	41946774	157	-3.08436	6.00889e-26	1.7924e-24	474	ENSG00000100162	-	CENPM	620.244	-3.29338
chr22	46536488	46537580	46537474	46537580	46536488	46536622	46537581	46537628	15	2.05057	0.0105054	0.0340367	33	46537417	46537490	85	0.134263	0.517923	0.692125	501	46536622	46536669	11	2.81415	0.00357277	0.0133534	25	46536430	46536495	17	0.313085	0.604741	0.758886	48	ENSG00000075275	-	CELSR1	6472.61	0.259702
chr22	46537474	46537720	46537606	46537720	46537474	46537580	46537702	46537926	375	0.349059	0.00859692	0.0286573	1243	46537548	46537631	429	0.314774	0.0132558	0.0416051	1438	46537581	46537628	15	2.05057	0.0105054	0.0340367	33	46537417	46537490	85	0.134263	0.517923	0.692125	501	ENSG00000075275	-	CELSR1	6472.61	0.259702
chr22	50244538	50245107	50245022	50245107	50244538	50244661	50245079	50245154	8	-0.215912	0.67422	0.810023	66	50244948	50245037	174	-0.0758709	0.633034	0.780647	769	50244659	50244708	16	-0.921686	0.237141	0.409348	32	50244468	50244542	10	-0.852228	0.117028	0.244239	65	ENSG00000128159	-	TUBGCP6	1514.28	-0.218807
chr3	9396306	9396704	9396657	9396704	9396306	9396323	9396702	9396751	16	0.71228	0.286323	0.467199	36	9396590	9396683	74	2.49019	6.67338e-28	2.16229e-26	494	9396319	9396466	52	-1.17879	0.00191126	0.0076803	139	9396255	9396311	14	-0.158773	0.80195	0.892316	43	ENSG00000206573	-	THUMPD3-AS1	1691.56	0.607085
chr3	11719330	11719753	11719642	11719753	11719330	11719582	11719733	11719939	30	1.11895	0.000300495	0.00144984	175	11719412	11719651	140	0.236327	0.0546221	0.134799	1525	11719574	11719622	3	0.929574	0.30438	0.488033	22	11719282	11719337	8	1.00237	0.0950315	0.208297	45	ENSG00000144560	-	VGLL4	2620.78	0.145834
chr3	14947283	14947582	14947464	14947582	14947283	14947388	14947549	14947650	609	0.537059	1.19247e-05	7.53359e-05	2181	14947395	14947498	1384	-1.44341	6.92132e-63	6.45806e-61	11735	14947349	14947437	91	1.29797	8.63748e-08	7.43335e-07	326	14947212	14947309	66	-1.72189	6.20238e-18	1.23283e-16	638	ENSG00000225733	-	FGD5-AS1	6854.54	-0.886007
chr3	28348682	28349156	28349022	28349156	28348682	28348720	28349156	28349226	16	0.0362563	0.932204	0.965092	87	28348741	28349056	96	-0.745674	1.13341e-09	1.21437e-08	1792	28348700	28348773	26	1.20925	0.00321171	0.0121676	98	28348632	28348685	14	-1.09929	0.0424858	0.109898	68	ENSG00000163512	-	AZI2	1160.65	-0.671457
chr3	39383290	39383638	39383290	39383369	39383583	39383638	39383242	39383292	6	-0.253903	0.799266	0.890536	18	39383337	39383454	818	-0.547957	2.13172e-09	2.22258e-08	5264	39383514	39383600	58	1.03099	0.00090541	0.00393784	179	39383632	39383702	229	-0.311275	0.0608097	0.146632	808	ENSG00000144659	+	SLC25A38	1530.09	-0.331996
chr3	39383583	39384454	39383583	39383638	39384267	39384454	39383514	39383600	58	1.03099	0.00090541	0.00393784	179	39383632	39383702	229	-0.311275	0.0608097	0.146632	808	39384200	39384302	53	0.552678	0.0144805	0.0448316	359	39384420	39384476	6	2.62552	0.000994796	0.00428493	34	ENSG00000144659	+	SLC25A38	1530.09	-0.331996
chr3	47803070	47803591	47803070	47803137	47803421	47803591	47803024	47803086	17	0.599981	0.210453	0.376909	71	47803131	47803215	383	-0.697895	2.03252e-10	2.33548e-09	2398	47803376	47803433	6	1.01918	0.227258	0.397506	28	47803485	47803660	6	-0.954676	0.0420452	0.109012	85	ENSG00000132153	+	DHX30	2901.65	-0.699949
chr3	48428812	48429778	48429616	48429778	48428812	48429093	48429775	48429815	15	0.68936	0.194306	0.355615	58	48429554	48429647	92	1.64314	8.17369e-24	2.20546e-22	913	48429081	48429199	35	1.25599	0.000659524	0.00296057	191	48428767	48428815	22	0.253912	0.775597	0.876446	21	ENSG00000164050	-	PLXNB1	7665.35	1.56858
chr3	48990152	48990434	48990152	48990253	48990375	48990434	48990102	48990153	5	-1.6338	0.0515218	0.12868	31	48990224	48990304	324	-0.349241	0.000607018	0.00274896	2743	48990323	48990379	6	-0.249361	0.773628	0.87516	23	48990416	48990512	25	0.260878	0.421718	0.60686	161	ENSG00000178467	+	P4HTM	1941.51	-0.159901
chr3	49469999	49470629	49469999	49470135	49470517	49470629	49469950	49470000	8	-0.352083	0.617048	0.768433	35	49470118	49470205	276	1.68033	6.7209e-27	2.08269e-25	838	49470468	49470545	17	0.259103	0.577506	0.738629	91	49470601	49470696	34	1.47881	4.51337e-06	3.05678e-05	186	ENSG00000173402	+	DAG1	7096.75	0.330954
chr3	49723444	49724218	49723950	49724218	49723444	49723506	49724198	49724267	9	-1.29364	0.0573882	0.140182	47	49723878	49723975	967	-0.147492	0.171246	0.324664	4369	49723503	49723557	23	0.237042	0.72675	0.84522	34	49723391	49723467	5	-1.27451	0.0746814	0.172546	38	ENSG00000173540	-	GMPPB	2023.5	-0.0999427
chr3	50350780	50351209	50350780	50350868	50351060	50351209	50350666	50350815	176	-1.06659	1.1211e-15	1.93494e-14	1489	50350841	50350945	303	0.3524	0.00447009	0.0162363	2182	50351011	50351061	6	-0.238421	0.771956	0.874269	25	50351196	50351262	48	0.369184	0.319037	0.50469	126	ENSG00000114395	+	CYB561D2	819.142	0.289634
chr3	52287767	52288110	52287767	52287827	52288019	52288110	52287730	52287805	8	0.0632399	0.891185	0.943536	75	52287812	52287889	171	0.632724	0.000306349	0.00147572	595	52287969	52288038	128	0.720098	0.00111759	0.00476194	345	52288108	52288161	8	-1.40042	0.0573322	0.140076	36	ENSG00000168237	+	GLYCTK	119.073	0.351987
chr3	63911997	63912666	63911997	63912111	63912382	63912666	63911856	63912034	78	-1.76548	5.69356e-13	8.15228e-12	409	63912080	63912182	1584	-0.125161	0.212105	0.378977	4905	63912334	63912390	76	-1.89343	1.37737e-05	8.61094e-05	136	63912456	63912739	530	-1.15615	1.52219e-28	5.09019e-27	3249	ENSG00000163635	+	ATXN7	3480.94	0.0967156
chr3	63912382	63913143	63912382	63912666	63912889	63913143	63912334	63912390	76	-1.89343	1.37737e-05	8.61094e-05	136	63912456	63912739	530	-1.15615	1.52219e-28	5.09019e-27	3249	63912826	63912895	16	-0.995239	0.0533109	0.132228	70	63913138	63913210	29	-0.700805	0.0599357	0.144996	135	ENSG00000163635	+	ATXN7	3480.94	0.0967156
chr3	71583227	71583776	71583666	71583776	71583227	71583391	71583750	71583835	36	-0.660242	0.102212	0.220182	109	71583552	71583759	86	-0.835619	1.77919e-06	1.28234e-05	786	71583334	71583428	9	0.505691	0.222886	0.392172	107	71583188	71583253	34	1.90501	1.10117e-09	1.18103e-08	207	ENSG00000114861	-	FOXP1	1182.45	0.144482
chr3	81761195	81761699	81761645	81761699	81761195	81761306	81761697	81761749	14	4.24079	1.25314e-05	7.89152e-05	46	81761481	81761773	2988	2.18268	3.09799e-143	1.20687e-140	11369	81761275	81761356	14	0.748815	0.100728	0.217661	79	81761144	81761202	7	0.997209	0.19704	0.359257	30	ENSG00000114480	-	GBE1	3985.53	2.2113
chr3	88058627	88059293	88058975	88059293	88058627	88058734	88059211	88059312	462	1.23607	1.76091e-25	5.12604e-24	3426	88058924	88059023	1649	-0.154576	0.0721616	0.167889	9765	88058731	88058788	8	0.132428	0.829792	0.908808	48	88058581	88058649	6	-1.27783	0.0132323	0.0415482	75	ENSG00000163320	-	CGGBP1	3835.24	-0.0388162
chr3	112561670	112562047	112561934	112562047	112561670	112561708	112562034	112562199	242	-0.259031	0.0871414	0.194662	893	112561860	112561962	1336	-0.114193	0.250232	0.426081	8085	112561689	112561796	34	0.145723	0.636405	0.783205	172	112561600	112561688	235	-1.6651	7.51637e-35	3.21724e-33	2481	ENSG00000144848	-	ATG3	2558.94	-0.452168
chr3	113696262	113697024	113696641	113697024	113696262	113696359	113697012	113697073	3	0.149039	0.844952	0.918096	29	113696572	113696677	1025	0.264299	0.00328282	0.0123974	7985	113696332	113696413	70	-0.130013	0.514613	0.689403	574	113696211	113696268	3	-0.823996	0.45139	0.632636	17	ENSG00000176542	-	USF3	1300.18	0.275144
chr3	120093920	120094802	120094578	120094802	120093920	120094036	120094752	120094829	11	0.595362	0.209872	0.376251	77	120094529	120094606	80	0.714763	0.00385057	0.0142652	318	120093900	120094109	31	0.815184	0.000509684	0.00234792	300	120093871	120093928	8	0.171412	0.802667	0.892737	37	ENSG00000082701	-	GSK3B	5927.67	1.0248
chr3	120095010	120095846	120095010	120095275	120095748	120095846	120094987	120095039	6	0.260497	0.743243	0.855533	25	120095084	120095349	330	1.57394	4.57706e-33	1.82944e-31	1400	120095523	120095753	21	-0.435274	0.167931	0.320052	173	120095820	120095899	9	-1.62337	0.00428709	0.0156584	72	ENSG00000242622	+	ENSG00000242622	247.115	0.998267
chr3	123448402	123449390	123449267	123449390	123448402	123448453	123449362	123449437	22	1.03423	0.0126486	0.0399425	101	123449223	123449297	25	0.753957	0.00833921	0.0279028	202	123448454	123448502	11	0.542216	0.398196	0.584926	38	123448357	123448405	13	-0.152464	0.851874	0.921999	28	ENSG00000173175	-	ADCY5	3618.13	0.292247
chr3	125595292	125595671	125595442	125595671	125595292	125595413	125595646	125595799	24	0.380105	0.146401	0.288883	256	125595393	125595594	77	-0.236884	0.0698869	0.163578	1396	125595414	125595467	8	0.66401	0.466399	0.646205	20	125595240	125595330	40	-0.69881	0.00521704	0.0185743	310	ENSG00000144909	-	OSBPL11	1382.96	-0.26206
chr3	132660291	132660908	132660291	132660345	132660670	132660908	132660245	132660298	3	-0.089435	0.896381	0.946118	34	132660340	132660446	592	-0.666391	1.9924e-10	2.29094e-09	7312	132660619	132660713	9	0.0103244	0.980874	0.989985	95	132660897	132660960	91	0.384561	0.178307	0.333991	208	ENSG00000081307	+	UBA5	2919.34	-0.799929
chr3	132660670	132661163	132660670	132660908	132660942	132661163	132660619	132660713	9	0.0103244	0.980874	0.989985	95	132660897	132660960	91	0.384561	0.178307	0.333991	208	132660810	132660976	34	-0.907302	0.00980762	0.0320945	158	132661154	132661210	3	-1.57417	0.190818	0.350749	15	ENSG00000081307	+	UBA5	2919.34	-0.799929
chr3	136195284	136196965	136196853	136196965	136195284	136195462	136196936	136196986	4	-1.35074	0.0836326	0.188527	34	136196796	136196882	45	1.10198	0.000549201	0.00251338	167	136195460	136195510	16	4.64548	3.21584e-05	0.00018768	39	136195234	136195289	6	0.176816	0.819922	0.902815	26	ENSG00000174579	-	MSL2	1412.95	0.0874855
chr3	146161049	146161386	146161331	146161386	146161049	146161097	146161384	146161435	23	0.888375	0.148331	0.291655	43	146161286	146161338	470	-0.749291	1.69828e-06	1.22873e-05	877	146161088	146161144	15	-1.16813	0.114123	0.23963	36	146160961	146161064	310	-2.14046	6.25662e-62	5.69946e-60	2479	ENSG00000152952	-	PLOD2	3341.6	-0.988644
chr3	147393327	147394176	147393327	147393429	147393865	147394176	147393314	147393370	5	-1.77651	0.0780487	0.178636	22	147393412	147393786	169	-1.10508	8.75521e-20	1.92642e-18	2056	147393823	147393876	5	0.584554	0.458168	0.638937	28	147394176	147394224	16	-0.950375	0.277209	0.456975	29	ENSG00000152977	+	ZIC1	723.859	-1.03745
chr3	149970144	149970993	149970894	149970993	149970144	149970243	149970981	149971087	16	1.33699	0.000268373	0.00130747	128	149970819	149970920	4079	-0.857999	1.84582e-26	5.61492e-25	20669	149970160	149970297	9	-0.234943	0.599185	0.754879	84	149970094	149970147	4	0.369283	0.723107	0.842881	16	ENSG00000070087	-	PFN2	5368.19	-1.08087
chr3	150408091	150408640	150408091	150408297	150408540	150408640	150408045	150408097	9	0.315557	0.677155	0.812006	27	150408212	150408485	1360	0.858406	6.63027e-21	1.54407e-19	4488	150408422	150408607	29	1.26974	0.00375898	0.0139616	93	150408633	150408716	204	0.267636	0.139316	0.278441	532	ENSG00000196428	+	TSC22D2	5081.09	0.930548
chr3	157159542	157160294	157160146	157160294	157159542	157159543	157160279	157160363	20	-1.12689	0.0116495	0.0371806	103	157160087	157160184	3375	-0.107837	0.27823	0.458158	6179	157159426	157159616	46	-0.706534	0.00749808	0.0254694	288	157159522	157159544	11	-1.07355	0.205967	0.371061	27	ENSG00000163660	-	CCNL1	3380.44	0.123664
chr3	160399529	160400966	160399529	160399649	160400941	160400966	160399471	160399549	14	-2.39898	1.2056e-05	7.61026e-05	95	160399628	160399720	2696	-1.92855	8.56183e-108	1.96147e-105	7261	160400914	160400971	9	4.51763	1.30976e-06	9.63302e-06	56	160400964	160401013	16	-2.6656	0.0032097	0.012161	39	ENSG00000113810	+	SMC4	8733.62	-1.65969
chr3	161221233	161222022	161221233	161221319	161221855	161222022	161221105	161221240	14	-1.04329	0.0187096	0.0556757	98	161221304	161221582	4351	-0.685612	3.24729e-17	6.2093e-16	22808	161221808	161221858	3	-3.68978	0.00320446	0.0121444	22	161222014	161222071	46	-1.92912	3.40933e-06	2.35409e-05	145	ENSG00000169251	+	NMD3	18406.9	-0.633523
chr3	161369472	161371845	161371516	161371845	161369472	161369872	161371638	161371896	2422	0.877301	6.17641e-14	9.45714e-13	6894	161371464	161371700	46500	0.113724	0.0891516	0.198053	103493	161369767	161369924	13	-1.42064	0.000293484	0.00141917	137	161369420	161369778	432	-0.575335	5.70142e-06	3.80107e-05	1728	ENSG00000196542	-	SPTSSB	57181.6	0.000816768
chr3	170357620	170358443	170357620	170357720	170358201	170358443	170357550	170357625	9	0.790693	0.120626	0.249883	64	170357298	170357770	626	-0.226826	0.0109016	0.0351225	8368	170358151	170358221	44	-0.880479	0.0400101	0.104702	103	170358439	170358607	36	-0.643073	0.0737204	0.170783	146	ENSG00000136603	+	SKIL	3773.87	0.0488068
chr3	184298948	184299860	184298948	184299253	184299858	184299860	184298897	184298963	33	-0.924916	0.0267007	0.0750166	108	184299225	184299317	8645	-0.197531	0.0167699	0.0507484	48420	184299809	184299866	5	3.71717	0.00206459	0.00822876	22	184299860	184299907	7	-0.0500808	0.975301	0.98679	7	ENSG00000175166	+	PSMD2	19297.8	-0.247375
chr3	184361604	184362605	184361604	184361736	184362482	184362605	184361555	184361623	52	-1.60452	2.38916e-06	1.69154e-05	191	184361706	184361809	160	-1.0029	6.68109e-10	7.32407e-09	1085	184362457	184362514	7	-3.09866	0.000325178	0.00155808	49	184362216	184362658	142	-0.752998	4.30082e-06	2.92309e-05	856	ENSG00000163882	+	POLR2H	2280.08	-0.369112
chr3	186783290	186784202	186783290	186783576	186784143	186784202	186783158	186783312	46	0.729613	0.000643357	0.00289446	372	186783572	186783628	17603	0.30052	0.000344665	0.00164141	21856	186784064	186784144	8	1.50549	0.00104189	0.00446911	85	186784196	186784254	11	-1.42086	0.0491641	0.123868	41	ENSG00000156976	+	EIF4A2	9353.01	0.202533
chr3	188153764	188154186	188153764	188153862	188154097	188154186	188153603	188153855	12	-0.357033	0.306928	0.491122	144	188153838	188154024	113	0.948917	1.21154e-15	2.08508e-14	2098	188153947	188154119	46	0.369169	0.12751	0.260184	303	188154157	188154258	93	0.596854	0.000590738	0.00268314	702	ENSG00000145012	+	LPP	3304.34	0.500562
chr3	192917020	192918002	192917855	192918002	192917020	192917136	192917998	192918066	13	0.839377	0.0466825	0.118748	89	192917788	192917873	189	-0.771936	4.18819e-08	3.74897e-07	1170	192917020	192917248	53	1.11059	3.84195e-05	0.000221242	250	192916973	192917026	6	1.44843	0.214449	0.381913	12	ENSG00000180611	-	MB21D2	1146.87	0.00484483
chr3	196568525	196568850	196568525	196568646	196568728	196568850	196568472	196568552	47	-0.325604	0.1522	0.297433	380	196568640	196568722	350	0.403508	8.74453e-05	0.000471657	2872	196568681	196568731	5	-1.05905	0.237003	0.409184	23	196568817	196568977	138	-1.7273	1.74672e-26	5.31727e-25	1264	ENSG00000174013	+	FBXO45	2951.78	-0.0745044
chr3	196712241	196712670	196712241	196712347	196712593	196712670	196712182	196712266	44	0.0386817	0.868473	0.930994	318	196712324	196712428	1545	-0.484241	5.87446e-07	4.54599e-06	14588	196712545	196712600	5	-0.919448	0.25417	0.430846	28	196712646	196712724	29	-1.38686	0.000810379	0.00356043	125	ENSG00000163964	+	PIGX	1903.65	-0.761689
chr4	673850	674541	674267	674541	673850	673905	674443	674611	389	0.125718	0.26019	0.437876	2234	674215	674291	7691	-0.30188	0.000315363	0.00151483	29067	673903	673985	31	-0.636803	0.0843718	0.189779	131	673780	673867	31	-2.84168	2.62565e-11	3.26847e-10	188	ENSG00000169020	-	ATP5ME	795.914	-0.535793
chr4	986931	987479	986931	987043	987271	987479	986873	986951	41	-0.741981	0.0309611	0.0848019	158	986997	987096	296	0.911356	4.22251e-12	5.63463e-11	1452	987222	987280	4	-1.02526	0.168091	0.320278	33	987473	987535	17	2.33754	4.51789e-05	0.000257136	63	ENSG00000127415	+	IDUA	1600.93	1.16223
chr4	1248690	1249272	1249091	1249272	1248690	1248938	1249156	1249333	151	-0.527384	0.000125243	0.000654725	1274	1249041	1249122	1857	-0.283267	0.00208189	0.0082891	9894	1248914	1248991	64	1.20791	5.78088e-09	5.74527e-08	453	1248607	1248719	68	1.34817	4.68912e-14	7.25076e-13	627	ENSG00000159692	-	CTBP1	5594.07	0.0713809
chr4	3765828	3766384	3765828	3765912	3766260	3766384	3765777	3765831	4	1.34142	0.0526219	0.130879	35	3765899	3765965	427	0.744103	2.89583e-07	2.33612e-06	1094	3766221	3766309	10	0.698906	0.10876	0.230887	85	3766378	3766458	58	0.600733	0.0379393	0.100192	211	ENSG00000184160	+	ADRA2C	1780.02	0.436126
chr4	38663935	38665113	38663935	38664198	38664892	38665113	38663883	38663943	4	2.65774	0.00629353	0.0218861	23	38664073	38664324	10845	1.40441	6.26393e-56	4.88044e-54	28012	38664819	38664899	43	1.34975	1.29211e-05	8.11815e-05	186	38665045	38665165	53	2.44405	1.61602e-10	1.87602e-09	146	ENSG00000109787	+	KLF3	3956.57	1.54479
chr4	55546615	55546997	55546908	55546997	55546615	55546741	55546992	55547049	5	-2.1175	0.0415107	0.107906	28	55546828	55546984	149	-0.615712	1.08454e-05	6.89548e-05	1116	55546726	55546788	16	0.48136	0.456499	0.637322	41	55546488	55546646	61	-1.5008	8.24949e-10	8.94994e-09	450	ENSG00000134852	-	CLOCK	1450.96	-1.09745
chr4	77157108	77158174	77157108	77157242	77158011	77158174	77157042	77157109	28	3.84251	3.37523e-10	3.80185e-09	93	77157224	77157295	3075	1.97692	1.74757e-108	4.08102e-106	7548	77157938	77158028	49	3.52017	1.95972e-22	4.92372e-21	240	77158173	77158226	5	2.81337	0.000312206	0.00150146	38	ENSG00000138764	+	CCNG2	3006.2	2.52365
chr4	82373117	82374185	82374132	82374185	82373117	82373301	82374170	82374337	47	2.0097	1.86195e-07	1.5418e-06	139	82374074	82374166	331	1.76368	1.67665e-46	1.02932e-44	1574	82373292	82373349	4	-0.873407	0.256007	0.433062	31	82373066	82373124	10	-0.83579	0.277588	0.457368	31	ENSG00000138668	-	HNRNPD	7357.41	-1.488
chr4	86934893	86936329	86934893	86935047	86936178	86936329	86934843	86934895	11	1.64843	0.0925493	0.20402	21	86934991	86935167	620	0.871905	1.61524e-19	3.50477e-18	2874	86936057	86936185	28	1.44575	0.000119302	0.000626531	122	86936325	86936366	29	-0.676405	0.241576	0.41505	56	ENSG00000172493	+	AFF1	1394.15	0.442006
chr4	87422508	87422852	87422508	87422572	87422717	87422852	87422442	87422519	20	0.0945073	0.850612	0.921287	70	87422568	87422748	113	0.433357	0.00137883	0.00574303	1192	87422672	87422723	8	1.42827	0.241419	0.41487	12	87422806	87422946	13	-0.702771	0.0156388	0.0478378	241	ENSG00000170502	+	NUDT9	1044.54	0.147145
chr4	88592307	88593351	88592307	88592482	88593135	88593351	88592251	88592326	80	1.11231	0.000108842	0.000576434	226	88592466	88592559	590	0.189952	0.121059	0.250572	2237	88593093	88593142	7	1.72413	0.00645854	0.0223909	45	88593239	88593400	32	0.455708	0.0882805	0.196609	252	ENSG00000138641	+	HERC3	17.4838	0.650125
chr4	102826847	102827610	102827541	102827610	102826847	102826982	102827608	102827684	67	1.47905	0.000109941	0.000581565	120	102827448	102827548	2833	-0.25527	0.00268249	0.0103841	22038	102826983	102827031	7	-0.699987	0.329439	0.515205	35	102826778	102826881	131	-1.92945	3.81492e-28	1.25096e-26	966	ENSG00000109332	-	UBE2D3	3925.56	0.132746
chr4	102868894	102869294	102868894	102869040	102869227	102869294	102868768	102868921	47	-1.22583	1.13998e-06	8.4601e-06	344	102868933	102869111	2893	-1.047	8.64085e-27	2.66982e-25	13525	102869174	102869259	10	0.266974	0.615443	0.76718	58	102869293	102869388	14	0.784227	0.079031	0.180396	81	ENSG00000145354	+	CISD2	962.597	-1.17589
chr4	105895350	105896100	105895350	105895440	105896099	105896100	105895305	105895356	4	0.957965	0.318193	0.503778	20	105895425	105895566	592	-0.0525552	0.645832	0.789942	1839	105896056	105896103	10	0.379207	0.665862	0.804297	20	105896100	105896147	9	1.5318	0.141525	0.281663	16	ENSG00000168743	+	NPNT	3185.72	0.763724
chr4	112636899	112637501	112636899	112637173	112637395	112637501	112636822	112636917	89	-2.18338	1.81989e-28	6.0665e-27	730	112636960	112637232	264	-0.0568308	0.633544	0.781048	1757	112637346	112637397	9	0.129706	0.900248	0.948317	16	112637413	112637595	79	-0.435666	0.0131218	0.0412583	628	ENSG00000174720	+	LARP7	1770.82	-0.32264
chr4	124712109	124712883	124712731	124712883	124712109	124712297	124712850	124712899	6	0.253468	0.758851	0.865996	23	124712649	124712747	5998	-0.79323	3.91235e-20	8.76814e-19	12925	124712296	124712347	8	-2.77776	0.000605152	0.00274125	51	124711867	124712134	82	-3.13865	3.28151e-36	1.46853e-34	647	ENSG00000151458	-	ANKRD50	6114.83	-0.880509
chr4	127880798	127881630	127880798	127880915	127881497	127881630	127880736	127880804	8	-1.70639	0.00366545	0.0136551	64	127880888	127880983	263	-3.13708	1.04483e-72	1.24228e-70	1473	127881422	127881498	12	-2.8902	0.00111693	0.00476006	43	127881628	127881681	5	-3.76602	0.00811622	0.0272689	14	ENSG00000142731	+	PLK4	904.873	-3.37977
chr4	158171271	158172834	158171271	158171417	158172615	158172834	158171193	158171402	88	3.48908	2.11174e-62	1.93831e-60	744	158171384	158171485	408	5.11828	2.24778e-130	7.2526e-128	1747	158172565	158172618	7	1.45398	0.0951404	0.20846	22	158172832	158172904	8	1.38424	0.0242006	0.0691295	49	ENSG00000248429	+	FAM198B-AS1	1337.17	3.81578
chr4	173168681	173169200	173168681	173168810	173169111	173169200	173168636	173168757	7	0.228916	0.675319	0.810736	53	173168752	173168913	2184	0.454014	2.2296e-07	1.8269e-06	13365	173169053	173169119	16	0.649722	0.0589248	0.143099	141	173169201	173169242	5	1.31952	0.23823	0.410668	15	ENSG00000109586	+	GALNT7	4290.37	0.674932
chr4	173169111	173169640	173169483	173169640	173169111	173169200	173169602	173169660	2	1.88279	0.0363475	0.0967253	23	173169403	173169501	55	1.20568	0.000367319	0.00173949	155	173169201	173169242	5	1.31952	0.23823	0.410668	15	173169053	173169119	16	0.649722	0.0589248	0.143099	141	ENSG00000245213	-	ENSG00000245213	136.517	1.15175
chr5	473035	474681	473035	473219	474433	474681	472923	473097	167	-0.349407	0.00130577	0.00547326	3271	473206	473302	288	1.24991	1.19748e-26	3.67976e-25	2395	474383	474437	3	0.987095	0.333907	0.519789	15	474598	474730	263	0.980464	9.82586e-07	7.35404e-06	469	ENSG00000225138	+	SLC9A3-AS1	3765.81	1.22676
chr5	1883375	1883964	1883375	1883388	1883818	1883964	1883329	1883388	17	-2.84538	0.000446708	0.0020837	51	1883347	1883531	134	-1.10401	1.95767e-12	2.68571e-11	1181	1883748	1883822	16	-2.00017	0.00226492	0.00892828	56	1883964	1884021	41	-0.774443	0.0488537	0.123196	114	ENSG00000249116	+	IRX4-AS1	22.7996	-1.19153
chr5	6713168	6714017	6713168	6713459	6713889	6714017	6713123	6713186	17	-0.83767	0.157622	0.305319	58	6713291	6713509	356	-0.52301	0.00151995	0.00626722	1229	6713818	6713904	15	0.916483	0.0694495	0.162757	66	6713990	6714068	40	-1.07277	0.0042996	0.0156959	133	ENSG00000112941	+	TENT4A	1658.49	-0.391511
chr5	43066973	43067560	43067366	43067560	43066973	43067025	43067486	43067610	10	-1.38007	0.0148765	0.0458726	62	43067311	43067472	26	-0.115031	0.653795	0.79558	254	43067023	43067087	22	-1.24403	0.00862344	0.0287344	97	43066899	43066978	14	0.212132	0.66081	0.800731	71	ENSG00000177738	-	ENSG00000177738	255.898	-1.09691
chr5	56815443	56816927	56815443	56815548	56816850	56816927	56815392	56815448	9	2.41049	0.00145798	0.00603792	35	56815542	56815621	992	0.282946	0.00106973	0.00457669	7645	56816802	56816855	9	0.497709	0.468779	0.648386	33	56816924	56816979	20	0.616081	0.161634	0.311159	80	ENSG00000095015	+	MAP3K1	3873.13	0.671606
chr5	56909476	56909948	56909476	56909595	56909838	56909948	56909427	56909478	3	-0.596312	0.537771	0.708289	18	56909518	56909666	280	-0.34446	0.00612195	0.0213624	1389	56909793	56909856	31	0.593054	0.238315	0.410761	66	56909948	56910127	25	-0.0720747	0.76508	0.869756	322	ENSG00000155542	+	SETD9	362.409	-0.531445
chr5	65925578	65926577	65925578	65925779	65926512	65926577	65925528	65925669	47	-0.21166	0.400203	0.587109	281	65925749	65925941	767	-0.0402889	0.683516	0.816656	3338	65926330	65926532	60	0.597377	0.015869	0.0484367	325	65926418	65926697	17	-0.340827	0.169018	0.321652	304	ENSG00000112851	+	ERBIN	3754.81	-0.0922465
chr5	69492702	69493705	69492702	69492789	69493503	69493705	69492650	69492709	5	0.358645	0.598988	0.754782	35	69492770	69492845	1774	-0.472782	1.20913e-05	7.63026e-05	6810	69493454	69493504	7	-0.138966	0.893122	0.944427	17	69493673	69493734	3	-0.718571	0.323862	0.509756	35	ENSG00000197822	+	OCLN	2016.02	0.0369912
chr5	78648243	78648984	78648771	78648984	78648243	78648282	78648974	78649055	5	2.26626	0.00219247	0.00867261	37	78648686	78648909	483	2.21965	1.28451e-98	2.44567e-96	2651	78648280	78648333	13	3.22739	0.000482392	0.00223317	33	78648195	78648246	14	4.4325	7.99318e-05	0.000434485	35	ENSG00000145685	-	LHFPL2	3038.2	2.29857
chr5	80255179	80256191	80256045	80256191	80255179	80255283	80256175	80256315	331	0.577727	3.17019e-06	2.20083e-05	2306	80255994	80256053	4112	1.63664	1.70559e-72	2.01374e-70	8237	80255280	80255350	37	5.76421	3.82887e-08	3.44301e-07	84	80255132	80255195	20	6.72702	1.06068e-09	1.13948e-08	58	ENSG00000164300	-	SERINC5	7497.95	1.62692
chr5	80654560	80655151	80654560	80654651	80654976	80655151	80654514	80654566	91	-2.23391	4.65167e-07	3.65023e-06	143	80654633	80654778	1838	-0.231819	0.014563	0.0450425	3664	80654906	80655002	415	-0.225092	0.0270828	0.0759242	2543	80655149	80655204	81	-1.57393	0.00011958	0.000627837	132	ENSG00000113318	+	MSH3	1070.24	-0.43871
chr5	87267720	87268848	87267720	87267889	87268825	87268848	87267673	87267727	7	-0.608638	0.373985	0.560215	42	87267855	87268044	125	-0.603881	6.07806e-06	4.03403e-05	1264	87268777	87268837	8	-2.03103	0.0115047	0.036778	39	87268844	87268896	46	-0.848819	0.130936	0.265413	68	ENSG00000145715	+	RASA1	1671.22	-0.500883
chr5	90409307	90410100	90409755	90410100	90409307	90409399	90410002	90410150	70	0.556739	0.0343263	0.0923232	246	90409679	90409782	658	-1.13313	1.02725e-31	3.9223e-30	4005	90409393	90409473	74	0.578929	0.0177644	0.0533057	283	90409262	90409312	12	-1.16018	0.192311	0.352827	28	ENSG00000153140	-	CETN3	632.261	-1.34758
chr5	90474359	90474888	90474770	90474888	90474359	90474523	90474861	90474943	96	-1.4445	1.05963e-11	1.36405e-10	502	90474613	90474781	139	0.104574	0.515808	0.690444	787	90474509	90474572	9	0.501038	0.394237	0.580927	47	90474334	90474419	17	-1.93283	5.32833e-07	4.14689e-06	163	ENSG00000176055	-	MBLAC2	368.23	-0.517411
chr5	91380124	91381167	91380124	91380405	91381018	91381167	91380045	91380271	16	1.07793	1.47195e-05	9.16162e-05	275	91380322	91380459	406	1.99327	1.34982e-52	9.78633e-51	1679	91380951	91381023	56	2.96017	6.42726e-31	2.38409e-29	395	91381154	91381218	40	-0.233647	0.562772	0.727538	119	ENSG00000281357	+	ARRDC3-AS1	198.475	2.42911
chr5	91381018	91383478	91383316	91383478	91381018	91381167	91383471	91383659	41	-0.263022	0.354002	0.539595	215	91383265	91383334	1845	-0.444645	9.35719e-05	0.000501852	2922	91381154	91381218	40	-0.233647	0.562772	0.727538	119	91380951	91381023	56	2.96017	6.42726e-31	2.38409e-29	395	ENSG00000113369	-	ARRDC3	988.576	0.231388
chr5	107670974	107672777	107672502	107672777	107670974	107671057	107672760	107672829	11	-0.364706	0.63253	0.780277	32	107672086	107672510	257	0.0632292	0.664814	0.803673	1101	107670965	107671163	16	0.855977	0.00394718	0.01458	187	107670837	107670976	12	-0.720206	0.211908	0.378761	61	ENSG00000184349	-	EFNA5	231.619	-0.195471
chr5	108381147	108381507	108381409	108381507	108381147	108381209	108381487	108381579	84	1.19639	3.53683e-07	2.82225e-06	325	108381343	108381441	310	-0.247576	0.0206448	0.0604261	2448	108381190	108381265	13	0.237382	0.602936	0.757599	77	108381082	108381168	32	-1.15576	0.0288889	0.0800575	83	ENSG00000145743	-	FBXL17	1304.96	0.0638427
chr5	119070838	119071398	119070838	119071114	119071322	119071398	119070822	119070884	6	0.539254	0.437389	0.620458	36	119071011	119071254	222	-0.321565	0.00578436	0.0203431	2281	119071276	119071330	9	1.02804	0.107726	0.229307	45	119071373	119071469	199	0.0591055	0.661946	0.801694	1308	ENSG00000172869	+	DMXL1	1902.01	-0.0440957
chr5	123089441	123090302	123090214	123090302	123089441	123089478	123090273	123090353	9	-0.00710966	0.989924	0.994784	54	123090119	123090282	41	-0.375999	0.109108	0.231457	404	123089473	123089527	16	-0.788034	0.188044	0.34685	49	123089370	123089444	8	-2.78355	0.000176678	0.000893492	60	ENSG00000223652	-	ENSG00000223652	141.662	-1.35834
chr5	128083542	128084660	128083542	128083765	128084582	128084660	128083477	128083560	63	0.955268	0.00252229	0.009831	175	128083757	128083817	6445	0.990398	8.3827e-22	2.03866e-20	8164	128084529	128084589	8	1.09899	0.110891	0.234375	34	128084658	128084712	89	0.753937	0.0406995	0.106145	154	ENSG00000064651	+	SLC12A2	17172.4	1.10483
chr5	129460109	129461139	129460109	129460313	129461040	129461139	129460037	129460119	23	-1.27458	0.000225185	0.00111414	168	129460277	129460458	1066	-1.47819	2.70811e-51	1.89985e-49	4486	129460994	129461118	41	-0.990993	0.0206538	0.0604441	101	129461132	129461187	12	-1.75439	4.43195e-05	0.000252704	125	ENSG00000145808	+	ADAMTS19	2453.08	-1.27034
chr5	132963119	132963775	132963528	132963775	132963119	132963429	132963771	132963890	6	-0.128947	0.806512	0.894777	64	132963476	132963640	6241	0.707776	5.23134e-17	9.85816e-16	16195	132963418	132963465	27	0.078646	0.89257	0.944175	52	132963074	132963122	11	-0.938659	0.318081	0.503668	21	ENSG00000072364	-	AFF4	7231.36	0.743445
chr5	134225527	134226409	134226213	134226409	134225527	134225601	134226394	134226486	36	-1.05746	0.0105827	0.0342387	117	134226163	134226228	1462	1.92865	2.80688e-69	3.07759e-67	2396	134225568	134225651	4	0.272307	0.70125	0.828617	32	134225480	134225578	21	-0.253458	0.630437	0.77866	62	ENSG00000113575	-	PPP2CA	6971.57	-0.0247385
chr5	134525491	134526631	134525491	134525669	134526520	134526631	134525415	134525505	11	-1.22305	0.0116904	0.0372844	85	134525647	134525739	1285	-2.77817	1.03403e-116	2.775e-114	4613	134526467	134526526	6	-0.0850817	0.886721	0.941014	46	134526626	134526698	13	-0.755259	0.1116	0.235523	84	ENSG00000043143	+	JADE2	2681.6	-1.97878
chr5	137752995	137754518	137754362	137754518	137752995	137753166	137754517	137754570	22	0.82853	0.199101	0.3619	42	137754307	137754371	6217	0.515047	4.78694e-13	6.88095e-12	20075	137753126	137753190	8	1.18214	0.0401537	0.10498	52	137752851	137753387	207	0.318641	0.0402964	0.105298	968	ENSG00000177733	-	HNRNPA0	11609.6	0.432504
chr5	139648195	139648963	139648195	139648357	139648833	139648963	139648137	139648211	48	-0.737264	0.0331096	0.0896897	154	139648250	139648439	1234	0.00965809	0.927909	0.96335	7215	139648770	139648868	18	0.125664	0.746011	0.857359	113	139648922	139649015	763	-0.33489	0.00112642	0.00479421	3127	ENSG00000171604	+	CXXC5	9712.21	-0.00402803
chr5	139648833	139649675	139648833	139648963	139649494	139649675	139648770	139648868	18	0.125664	0.746011	0.857359	113	139648922	139649015	763	-0.33489	0.00112642	0.00479421	3127	139649442	139649501	9	0.907141	0.170854	0.324105	36	139649660	139649703	4	1.21272	0.158126	0.306065	22	ENSG00000171604	+	CXXC5	9712.21	-0.00402803
chr5	140107705	140108171	140107705	140107819	140108063	140108171	140107574	140107728	11	-0.537491	0.129994	0.263973	152	140107768	140107927	120	0.578933	0.00026537	0.0012944	843	140108016	140108076	63	1.05909	0.00850715	0.0283861	103	140108052	140108223	28	-0.855571	0.00913925	0.0302176	180	ENSG00000185129	+	PURA	1940.61	0.123715
chr5	140113988	140114842	140113988	140114118	140114768	140114842	140113940	140114002	24	0.363091	0.436745	0.619932	71	140114086	140114170	390	-0.0733609	0.464523	0.644689	2963	140114724	140114792	21	-1.19202	0.0104462	0.0338761	93	140114756	140114889	16	-0.824293	0.161115	0.310375	54	ENSG00000185129	+	PURA	1940.61	0.123715
chr5	143403685	143404616	143404541	143404616	143403685	143403979	143404611	143404666	17	0.957889	0.146381	0.288867	37	143404398	143404561	174	0.775524	4.8657e-08	4.31794e-07	1034	143403977	143404081	6	2.32871	0.00221254	0.00874381	34	143403435	143403891	62	1.44608	9.07512e-26	2.68618e-24	1165	ENSG00000113580	-	NR3C1	2290.34	1.08619
chr5	143405179	143405434	143405351	143405434	143405179	143405323	143405432	143405483	7	1.01775	0.251841	0.428002	20	143405275	143405448	74	1.6289	3.08761e-09	3.16727e-08	239	143405320	143405373	13	3.39824	0.000132629	0.000689371	36	143405104	143405215	9	0.659374	0.161246	0.31058	74	ENSG00000113580	-	NR3C1	2290.34	1.08619
chr5	154754992	154757172	154754992	154755376	154757083	154757172	154754943	154755020	50	-1.27303	0.00111754	0.00476194	134	154755339	154755551	688	-0.424562	0.000158634	0.000810536	4480	154757035	154757084	4	0.901608	0.264397	0.442594	24	154757145	154757253	16	-0.635249	0.123243	0.253947	119	ENSG00000155506	+	LARP1	15601.6	-0.165828
chr5	173056207	173057380	173056207	173056351	173057122	173057380	173056101	173056210	6	0.876969	0.128691	0.262024	48	173056339	173056421	311	2.69124	1.9902e-61	1.79364e-59	1075	173057061	173057123	18	2.90166	4.05816e-06	2.77109e-05	66	173057326	173057431	23	-0.267847	0.396402	0.583142	182	ENSG00000164463	+	CREBRF	952.312	2.90135
chr5	177402849	177404421	177404144	177404421	177402849	177402962	177404395	177404468	10	-4.20374	0.000424874	0.00198965	30	177404097	177404169	57	-3.68986	8.63582e-16	1.50172e-14	235	177402935	177403009	5	-2.55623	0.00606722	0.0212056	35	177402807	177402856	15	-2.54419	0.000842146	0.00368754	51	ENSG00000131187	-	F12	378.51	-2.02176
chr5	178113372	178114264	178113372	178113531	178114051	178114264	178113324	178113388	16	0.432698	0.322657	0.5084	87	178113516	178113780	4594	0.657012	1.01474e-15	1.75567e-14	19698	178114000	178114150	21	0.219291	0.427649	0.611793	214	178114185	178114317	10	-0.163558	0.720382	0.841106	82	ENSG00000145911	+	N4BP3	7374.97	0.613449
chr5	178130883	178131504	178130883	178131013	178131373	178131504	178130822	178130992	46	-0.205404	0.280896	0.460995	504	178130998	178131094	2157	0.10769	0.198634	0.361324	9342	178131324	178131374	7	0.000720823	0.999478	0.999691	14	178131493	178131553	18	0.314882	0.617987	0.769229	43	ENSG00000145916	+	RMND5B	7633.24	0.198723
chr5	178204340	178205501	178204340	178204532	178205392	178205501	178204290	178204370	87	-1.5969	6.92519e-08	6.02788e-07	280	178204517	178204585	86038	-0.506238	3.96716e-09	4.01735e-08	113378	178205326	178205402	13	1.13152	0.00223439	0.00881699	126	178205501	178205568	7	4.10576	2.01069e-05	0.000121925	42	ENSG00000197451	+	HNRNPAB	23357.6	-0.628331
chr5	179550476	179550835	179550476	179550557	179550798	179550835	179550470	179550526	8	-0.894387	0.154904	0.301339	45	179550544	179550759	574	-0.111073	0.307941	0.492231	2949	179550750	179550812	10	1.12485	0.0280703	0.0782043	64	179550812	179550896	33	-0.0235738	0.950874	0.974955	133	ENSG00000176783	+	RUFY1	2247.87	-0.506384
chr5	179622794	179623962	179623669	179623962	179622794	179623008	179623950	179624041	31	-2.50915	1.6601e-09	1.75018e-08	189	179623617	179623688	12915	-0.35281	1.42777e-07	1.1974e-06	25649	179622979	179623076	20	1.45837	5.69924e-05	0.000318392	137	179622727	179622798	12	0.209066	0.690531	0.821196	58	ENSG00000169045	-	HNRNPH1	27280.7	-0.0821292
chr5	179806333	179807034	179806865	179807034	179806333	179806403	179806996	179807109	298	-0.969159	4.55626e-11	5.56119e-10	1124	179806788	179806984	906	-0.348426	0.00035748	0.00169632	4114	179806368	179806475	162	-0.583368	7.37174e-05	0.000403403	999	179806274	179806350	61	-0.829796	0.00249555	0.00973708	269	ENSG00000161013	-	MGAT4B	5550.28	-0.171229
chr5	180809853	180810224	180810134	180810224	180809853	180809923	180810200	180810364	50	-0.0775582	0.677643	0.812302	536	180810065	180810152	329	-1.05971	4.72305e-21	1.106e-19	2283	180809900	180809992	31	-0.322942	0.3765	0.562737	133	180809769	180809863	116	-1.51174	3.17628e-27	1.00041e-25	1355	ENSG00000131446	-	MGAT1	4076.05	-0.0451658
chr5	180831337	180831702	180831565	180831702	180831337	180831444	180831665	180831752	360	-1.3426	1.0864e-21	2.63076e-20	1307	180831468	180831628	410	-0.1733	0.061527	0.148032	3754	180831442	180831493	12	-0.867681	0.237478	0.409753	35	180831263	180831365	17	-1.62602	3.83514e-06	2.62772e-05	197	ENSG00000278970	-	HEIH	793.672	-0.400858
chr5	181191823	181192082	181191823	181191920	181191949	181192082	181191779	181191828	12	4.46599	6.50104e-05	0.000359785	35	181191884	181191965	392	0.831434	1.86975e-11	2.35771e-10	1469	181191901	181191955	11	4.01242	0.000554401	0.00253348	26	181192065	181192148	84	-0.420613	0.0093038	0.0306893	809	ENSG00000250222	+	ENSG00000250222	35.1817	0.200708
chr6	292001	292486	292001	292080	292417	292486	291954	292023	21	-0.50006	0.303766	0.487264	77	292021	292162	137	0.198779	0.234008	0.405713	814	292370	292418	7	0.39916	0.667671	0.805572	18	292466	292562	51	-0.135447	0.524216	0.697016	434	ENSG00000112679	+	DUSP22	566.783	-0.180504
chr6	2765083	2766015	2765083	2765411	2765921	2766015	2765019	2765105	23	0.465539	0.298132	0.480825	84	2765386	2765571	393	-0.052035	0.541883	0.711864	6147	2765854	2765925	9	0.721561	0.225832	0.39567	51	2765993	2766092	86	-0.324291	0.220085	0.388666	332	ENSG00000124535	+	WRNIP1	3776.17	0.00803045
chr6	3068500	3069059	3068500	3068507	3068920	3069059	3068450	3068502	20	2.13816	0.0012285	0.00518227	43	3068491	3068593	295	0.755134	2.16016e-15	3.65955e-14	3520	3068856	3068956	247	2.22232	1.06927e-62	9.93321e-61	1854	3069055	3069109	8	-1.33164	0.0484862	0.122423	44	ENSG00000137275	+	RIPK1	2267.25	0.286655
chr6	7107711	7108631	7107711	7107792	7108578	7108631	7107668	7107719	10	1.05512	0.135086	0.271824	34	7107717	7107824	366	-0.568319	9.51767e-10	1.02744e-08	4523	7108420	7108592	16	0.502404	0.165878	0.317225	132	7108607	7108711	48	0.0940632	0.694843	0.824341	321	ENSG00000124782	+	RREB1	2112.55	-0.357517
chr6	7108578	7109744	7108578	7108631	7109629	7109744	7108420	7108592	16	0.502404	0.165878	0.317225	132	7108607	7108711	48	0.0940632	0.694843	0.824341	321	7109594	7109648	7	1.39289	0.0436125	0.112304	36	7109740	7109795	12	1.83082	0.00889577	0.0295069	36	ENSG00000124782	+	RREB1	2112.55	-0.357517
chr6	7541383	7542506	7541383	7541671	7542416	7542506	7541303	7541411	72	1.11627	5.12301e-09	5.12337e-08	509	7541551	7541725	2351	2.08641	1.00862e-136	3.6752e-134	16069	7542364	7542429	17	0.771102	0.185322	0.343312	56	7542504	7542557	10	3.19585	4.33368e-06	2.94448e-05	55	ENSG00000096696	+	DSP	51029.6	1.91065
chr6	8102179	8102756	8102538	8102756	8102179	8102304	8102736	8102809	17	2.92715	7.5327e-07	5.73421e-06	67	8102386	8102570	1478	-0.405878	6.91298e-06	4.5457e-05	7133	8102301	8102349	3	2.179	0.0731091	0.169669	13	8102130	8102186	6	1.05842	0.10971	0.232491	42	ENSG00000124802	-	EEF1E1	355.806	-0.489031
chr6	10411993	10412307	10412165	10412307	10411993	10412156	10412303	10412363	45	2.01895	1.00889e-08	9.73269e-08	155	10412064	10412253	200	1.05099	3.87381e-07	3.07519e-06	431	10412154	10412200	3	4.68797	9.00171e-05	0.000484539	24	10411945	10411997	10	3.83822	5.4479e-07	4.23527e-06	58	ENSG00000137203	-	TFAP2A	1514.69	0.673232
chr6	13710835	13711947	13711834	13711947	13710835	13710951	13711938	13711994	4	0.925297	0.137831	0.276073	44	13711664	13711864	692	0.732178	6.44011e-12	8.4682e-11	4710	13710933	13710999	6	0.0961854	0.881791	0.938558	45	13710784	13710842	7	-0.366678	0.615791	0.767474	32	ENSG00000010017	-	RANBP9	4175.63	0.862214
chr6	16760183	16761725	16761459	16761725	16760183	16760306	16761608	16761779	60	2.84971	8.1656e-34	3.35254e-32	455	16761407	16761486	2364	1.16646	4.68883e-43	2.6198e-41	5272	16760016	16760357	67	1.58288	1.95314e-11	2.45554e-10	456	16759951	16760406	194	2.54742	1.8735e-40	9.5987e-39	663	ENSG00000124788	-	ATXN1	5803.11	1.63669
chr6	20211244	20212639	20212435	20212639	20211244	20211378	20212630	20212691	3	0.464763	0.587894	0.746309	22	20212362	20212753	331	-0.959581	4.9121e-21	1.14996e-19	3117	20211361	20211446	30	-0.673355	0.122809	0.25327	113	20211099	20211268	11	-1.03952	0.0231683	0.0666038	90	ENSG00000172197	-	MBOAT1	1956.4	-0.864281
chr6	21593522	21595687	21593522	21593750	21595624	21595687	21593496	21593542	8	2.07295	0.0277523	0.0774484	21	21593745	21593802	9009	1.43411	5.47593e-74	6.74801e-72	13868	21595559	21595627	13	-0.133991	0.804961	0.893936	57	21595679	21595734	7	-0.0400956	0.958006	0.978645	30	ENSG00000124766	+	SOX4	11917.4	1.51632
chr6	21595624	21596230	21596083	21596230	21595624	21595687	21596132	21596269	17	0.730269	0.120422	0.249546	77	21595990	21596089	25	1.6747	0.00835013	0.02793	245	21595679	21595734	7	-0.0400956	0.958006	0.978645	30	21595559	21595627	13	-0.133991	0.804961	0.893936	57	ENSG00000283480	-	ENSG00000283480	20.2521	1.46901
chr6	30061156	30061925	30061156	30061292	30061856	30061925	30061108	30061185	152	-0.239786	0.302221	0.485557	399	30061263	30061377	475	-0.388029	0.000946285	0.00409644	2049	30061834	30061858	10	2.80704	0.0400455	0.104769	13	30061899	30061994	47	-0.343802	0.305846	0.489836	153	ENSG00000066379	+	POLR1H	418.226	-0.375255
chr6	30326385	30326926	30326855	30326926	30326385	30326468	30326894	30326976	85	0.381945	0.0116856	0.0372734	866	30326817	30326893	249	-0.152214	0.269535	0.448525	1117	30326446	30326756	114	0.114512	0.450833	0.632191	824	30326315	30326408	50	-1.01243	0.00230302	0.00906325	173	ENSG00000231074	-	HCG18	1117.16	-0.394721
chr6	30686657	30687429	30687206	30687429	30686657	30686774	30687426	30687480	5	-3.48944	0.00583037	0.0204827	19	30687165	30687223	168	-1.2771	2.14094e-12	2.93048e-11	728	30686763	30686825	9	-0.455647	0.409512	0.595814	56	30686578	30686679	9	-2.01321	1.24365e-05	7.83583e-05	115	ENSG00000146112	-	PPP1R18	793.591	-0.675468
chr6	30884044	30884359	30884044	30884083	30884246	30884359	30883990	30884045	4	0.223834	0.754195	0.862941	32	30884063	30884251	184	-0.0792395	0.573794	0.735857	1053	30884201	30884262	12	0.466243	0.428872	0.612925	47	30884324	30884416	175	1.38766	1.2986e-25	3.80646e-24	1351	ENSG00000204580	+	DDR1	18597.8	0.784419
chr6	30884381	30884979	30884381	30884550	30884852	30884979	30884334	30884393	4	1.20971	0.181721	0.33847	19	30884484	30884589	379	1.42996	1.84884e-37	8.62549e-36	3450	30884797	30884853	25	1.47531	0.00160672	0.0065855	82	30884939	30885030	50	2.37896	9.2241e-14	1.39844e-12	201	ENSG00000204580	+	DDR1	18597.8	0.784419
chr6	31197685	31198085	31198036	31198085	31197685	31197790	31198084	31198132	5	-3.89246	0.00130793	0.00548148	25	31197991	31198037	12	-3.28283	0.0120193	0.0382158	17	31197788	31197842	5	-1.38457	0.0960196	0.209934	31	31197632	31197714	10	-0.863417	0.117748	0.245329	62	ENSG00000272501	-	ENSG00000272501	101.443	-1.02074
chr6	31541583	31542389	31542002	31542389	31541583	31541664	31542371	31542457	17	0.168053	0.693867	0.82361	93	31541942	31542015	5564	-0.329955	1.59617e-05	9.86141e-05	10718	31541660	31541711	33	1.98542	0.000378103	0.00178676	60	31541525	31541605	38	-1.7492	8.08593e-12	1.05405e-10	361	ENSG00000198563	-	DDX39B	5047.65	-0.140061
chr6	31652389	31653004	31652650	31653004	31652389	31652403	31652977	31653079	81	0.506648	0.088766	0.197433	194	31652602	31652668	2643	0.284499	0.00339579	0.012767	10657	31652398	31652535	113	0.222439	0.329782	0.515581	372	31652277	31652407	99	-0.198365	0.258874	0.436522	724	ENSG00000204463	-	BAG6	10634	0.109316
chr6	32153754	32154475	32153754	32154140	32154369	32154475	32153703	32153759	5	-3.36949	0.0109248	0.0351785	18	32154025	32154280	44	-1.65991	1.61341e-16	2.93756e-15	628	32154285	32154386	14	-0.289247	0.405005	0.591648	163	32154448	32154539	11	-1.49343	0.000806263	0.00354437	112	ENSG00000221988	+	PPT2	132.741	-0.68592
chr6	32969095	32970034	32969095	32969354	32969820	32970034	32969014	32969110	31	0.370966	0.30771	0.491973	123	32969170	32969408	177	-1.68572	4.11808e-18	8.2651e-17	703	32969768	32969829	17	1.15518	0.0217012	0.0630077	67	32969940	32970100	85	2.77127	3.23929e-39	1.60045e-37	615	ENSG00000204256	+	BRD2	16925.7	0.485405
chr6	33208437	33208804	33208437	33208499	33208661	33208804	33208290	33208454	23	-0.183371	0.6269	0.77591	137	33208484	33208562	3107	-0.369854	6.52818e-06	4.3128e-05	10317	33208602	33208664	2	-0.247243	0.795003	0.887993	18	33208800	33208853	12	-1.0077	0.133471	0.26939	43	ENSG00000204227	+	RING1	1942.06	-0.453327
chr6	34236756	34237618	34236756	34236904	34237403	34237618	34236705	34236759	25	2.34757	0.0036067	0.0134624	35	34236894	34236958	8540	-0.16558	0.0344508	0.092602	26165	34237357	34237437	47	0.840826	0.0499594	0.125475	109	34237428	34237694	204	-0.740607	1.35378e-07	1.13953e-06	1145	ENSG00000137309	+	HMGA1	4035.75	-0.343887
chr6	36196645	36197384	36196645	36196772	36197201	36197384	36196614	36196649	19	1.79594	0.00116375	0.00493573	61	36196737	36196825	1921	0.487875	1.36263e-07	1.14641e-06	5922	36197147	36197229	36	0.198243	0.467644	0.647352	247	36197360	36197444	31	-0.35006	0.331086	0.516931	134	ENSG00000096070	+	BRPF3	2840.25	0.435515
chr6	36676402	36677391	36676402	36676507	36677301	36677391	36676206	36676417	219	5.61352	3.52642e-60	3.07329e-58	792	36676471	36676575	3293	6.3996	2.78006e-106	6.18462e-104	10171	36677251	36677307	18	4.85371	1.27188e-07	1.07434e-06	68	36677286	36677466	54	6.75313	4.04722e-15	6.73363e-14	246	ENSG00000124762	+	CDKN1A	178266	5.5043
chr6	36678565	36680475	36678565	36678713	36680442	36680475	36678390	36678572	140	5.99987	1.33336e-45	7.97151e-44	641	36678708	36678765	371631	5.13561	0	0	419701	36680384	36680454	14	3.97633	7.34364e-10	8.01552e-09	90	36680390	36680551	8	4.96092	2.93374e-10	3.32448e-09	99	ENSG00000124762	+	CDKN1A	178266	5.5043
chr6	41072613	41074107	41072613	41072973	41073817	41074107	41072272	41072646	212	0.171652	0.0841008	0.189335	3832	41072887	41073020	1366	0.0531639	0.642955	0.787894	3156	41073744	41073845	47	0.455651	0.134084	0.270317	200	41074107	41074154	8	1.02062	0.327597	0.513441	15	ENSG00000001167	+	NFYA	2218.48	0.270897
chr6	42929428	42929773	42929428	42929479	42929722	42929773	42929317	42929432	10	0.548786	0.350658	0.536296	51	42929393	42929559	552	-0.602524	1.37949e-09	1.46632e-08	4524	42929607	42929732	21	0.124044	0.745763	0.857226	121	42929756	42929847	34	-1.55693	2.26274e-05	0.000135797	164	ENSG00000137161	+	CNPY3	2157.4	-0.820272
chr6	43059825	43060421	43059825	43059889	43060220	43060421	43059756	43059845	23	0.491247	0.195431	0.357123	113	43059871	43060036	36	-0.0280317	0.924416	0.961838	203	43060165	43060221	6	0.570027	0.449209	0.63076	28	43060418	43060469	11	0.772692	0.554172	0.721208	9	ENSG00000137171	+	KLC4	1131.01	0.526356
chr6	43171119	43172416	43171119	43171268	43172271	43172416	43171051	43171123	13	1.87409	3.57056e-05	0.000206939	90	43171255	43171555	1016	0.845192	4.45938e-18	8.9416e-17	3837	43172202	43172297	19	0.588917	0.112886	0.237592	130	43172396	43172481	21	-0.0428936	0.901777	0.94904	140	ENSG00000112658	+	SRF	5310.09	0.98185
chr6	43770088	43771573	43770088	43770210	43771565	43771573	43770041	43770091	20	0.319335	0.648424	0.791725	35	43770198	43770262	2270	0.892302	3.42316e-16	6.08837e-15	3740	43771410	43771679	8	-0.288042	0.494903	0.672158	102	43771570	43771686	10	-0.609947	0.151442	0.296281	94	ENSG00000112715	+	VEGFA	1585.82	0.485577
chr6	45421998	45422331	45421998	45422088	45422186	45422331	45421947	45422005	18	0.871971	0.152337	0.29764	50	45422051	45422147	67	1.16298	4.62098e-07	3.62879e-06	348	45422136	45422188	4	1.5696	0.134758	0.271389	16	45422297	45422361	10	-0.0023243	0.995886	0.997903	82	ENSG00000124813	+	RUNX2	363.344	1.01325
chr6	47477696	47478188	47477696	47477809	47478071	47478188	47477545	47477733	60	0.57668	0.000212002	0.00105459	766	47477768	47477861	901	0.500993	1.24925e-06	9.22088e-06	4514	47478020	47478078	140	2.36338	4.19737e-18	8.42024e-17	300	47478046	47478242	258	1.25959	4.04006e-24	1.10887e-22	2113	ENSG00000198087	+	CD2AP	3515.23	0.429891
chr6	54846624	54847178	54846624	54846770	54847083	54847178	54846402	54846650	516	-0.276246	0.00522077	0.0185852	3921	54846664	54846812	2355	-1.6891	5.60428e-80	7.66608e-78	7357	54847018	54847096	34	-2.88687	7.44527e-14	1.13588e-12	228	54847167	54847227	16	-2.03583	0.000369265	0.00174832	76	ENSG00000168143	+	FAM83B	2048.99	-1.64815
chr6	63572320	63573744	63572320	63572558	63573599	63573744	63572175	63572358	18	2.50188	3.24184e-16	5.77925e-15	233	63572517	63572610	3702	1.54233	1.46727e-72	1.73721e-70	17478	63573525	63573622	1910	4.23842	0	0	10383	63573716	63573856	241	4.25635	2.98306e-79	4.02836e-77	908	ENSG00000285976	+	ENSG00000285976	746.397	1.71313
chr6	75601768	75602362	75601768	75601879	75602334	75602362	75601722	75601773	17	-0.580321	0.365033	0.550995	47	75601851	75602200	818	0.512032	1.12856e-08	1.08168e-07	7872	75602287	75602337	16	2.45489	0.00114029	0.00484742	36	75602348	75602430	111	3.44263	4.90696e-25	1.40425e-23	265	ENSG00000112701	+	SENP6	5417.46	0.543144
chr6	82363513	82364324	82363513	82363848	82364163	82364324	82363449	82363515	27	0.645366	0.175983	0.331047	77	82363619	82363915	588	0.368017	6.69097e-05	0.000369426	5399	82364087	82364166	14	1.04857	0.0552199	0.135968	59	82364262	82364364	398	0.554985	3.70434e-06	2.54325e-05	2420	ENSG00000146242	+	TPBG	8319.85	0.353919
chr6	82364163	82364899	82364163	82364324	82364747	82364899	82364087	82364166	14	1.04857	0.0552199	0.135968	59	82364262	82364364	398	0.554985	3.70434e-06	2.54325e-05	2420	82364615	82364777	19	0.902462	0.0114928	0.0367469	140	82364782	82365019	85	-0.188734	0.219304	0.387742	918	ENSG00000146242	+	TPBG	8319.85	0.353919
chr6	85593383	85594093	85593854	85594093	85593383	85593409	85593975	85594104	9	0.561178	0.173351	0.327524	97	85593670	85593981	518	-0.696952	6.90246e-13	9.80025e-12	8174	85593396	85593450	3	0.715039	0.549753	0.718042	13	85593337	85593391	4	-2.73996	0.0517174	0.129075	12	ENSG00000135317	-	SNX14	2810.77	-0.602484
chr6	85642934	85643699	85643335	85643699	85642934	85643041	85643695	85643747	101	0.654652	0.0189168	0.0561931	224	85643170	85643341	3108	-0.242562	0.00769416	0.0260496	29587	85643015	85643108	19	-0.280865	0.466374	0.646191	143	85642857	85642956	1572	-1.12604	1.24229e-46	7.65437e-45	11914	ENSG00000135316	-	SYNCRIP	9513.16	-0.785279
chr6	87701387	87702486	87702232	87702486	87701387	87701759	87702485	87702537	9	0.568988	0.411191	0.59734	34	87702083	87702263	3379	0.477877	9.16184e-09	8.88602e-08	14322	87701727	87701827	19	1.06892	0.0153004	0.0469588	88	87701342	87701392	12	0.105192	0.909149	0.95324	18	ENSG00000135334	-	AKIRIN2	2922.76	0.592262
chr6	89638481	89638823	89638744	89638823	89638481	89638529	89638802	89638897	46	-0.462755	0.089596	0.198795	238	89638678	89638762	731	-0.511578	1.24459e-07	1.05223e-06	4156	89638511	89638601	8	0.742756	0.0945434	0.207437	88	89638402	89638489	216	-0.474018	0.0044522	0.0161825	926	ENSG00000083099	-	LYRM2	2600.23	-0.47679
chr6	106325422	106325891	106325782	106325891	106325422	106325484	106325886	106325966	26	-1.34269	0.00506535	0.0181088	92	106325582	106325819	485	0.0889457	0.318817	0.504426	7157	106325483	106325536	10	1.02812	0.147644	0.290708	33	106325373	106325438	58	-2.13922	1.13673e-17	2.23061e-16	458	ENSG00000057663	-	ATG5	1264.67	-0.330616
chr6	106974699	106975565	106975458	106975565	106974699	106974889	106975523	106975582	3	1.46479	0.128573	0.261848	18	106975412	106975480	195	2.52503	8.4674e-25	2.39638e-23	384	106974785	106974921	69	1.66282	8.59475e-20	1.89259e-18	588	106974530	106974789	126	1.65666	3.09893e-35	1.3469e-33	1362	ENSG00000272398	-	CD24	53570.5	1.74837
chr6	108559682	108560959	108559682	108559824	108560731	108560959	108559634	108559689	4	-1.078	0.280083	0.460169	19	108559814	108559869	2972	1.46405	1.17605e-05	7.43819e-05	5184	108560682	108560738	42	0.987172	0.0241731	0.0690628	91	108560816	108561236	464	-0.0043256	0.968089	0.983871	2453	ENSG00000118689	+	FOXO3	4846.54	0.662346
chr6	109094472	109095008	109094857	109095008	109094472	109094609	109095006	109095137	36	0.484688	0.10456	0.224137	188	109094773	109094863	45	0.00507914	0.981968	0.9905	381	109094586	109094657	32	1.44638	0.000376524	0.00177979	114	109094408	109094478	8	1.10592	0.121235	0.250814	35	ENSG00000080546	-	SESN1	5022.31	3.32349
chr6	111482663	111483074	111482919	111483074	111482663	111482743	111483049	111483125	6	1.26114	0.0395447	0.103722	45	111482911	111483010	13	-0.172286	0.610695	0.763558	150	111482710	111482765	12	1.33214	0.0128538	0.0405057	61	111482592	111482669	11	-0.477117	0.386642	0.573203	59	ENSG00000009413	-	REV3L	4281.28	1.14141
chr6	111482919	111483300	111483166	111483300	111482919	111483074	111483248	111483549	26	0.0575268	0.781013	0.879812	462	111483102	111483180	893	0.814547	5.10783e-17	9.63615e-16	4343	111483049	111483125	6	1.26114	0.0395447	0.103722	45	111482911	111483010	13	-0.172286	0.610695	0.763558	150	ENSG00000009413	-	REV3L	4281.28	1.14141
chr6	128519678	128520762	128520579	128520762	128519678	128519767	128520650	128520809	196	1.72244	3.00363e-35	1.30615e-33	1423	128520434	128520606	3687	0.610505	8.58199e-19	1.78868e-17	15016	128519764	128519814	6	2.61618	0.00266931	0.0103401	28	128519612	128519683	13	3.36812	1.56347e-08	1.47051e-07	79	ENSG00000152894	-	PTPRK	10395.2	0.543014
chr6	135181146	135183227	135181146	135181401	135183004	135183227	135181097	135181173	41	-1.12115	0.000565645	0.00258026	182	135181355	135181452	1014	-1.76459	3.10907e-82	4.42472e-80	7724	135182892	135183147	64	-1.20309	9.05365e-05	0.000486963	212	135183168	135183262	21	-2.18488	5.35817e-08	4.72865e-07	178	ENSG00000118513	+	MYB	1484.51	-1.7448
chr6	149717728	149718162	149718073	149718162	149717728	149717834	149718159	149718212	9	0.877189	0.25951	0.437159	26	149718023	149718104	400	-0.384294	0.000161712	0.000824818	3021	149717810	149717909	37	-0.0569474	0.874916	0.934686	137	149717659	149717729	15	-2.39051	0.000277176	0.00134717	63	ENSG00000131023	-	LATS1	1747.2	-0.481517
chr6	151391015	151391787	151391556	151391787	151391015	151391148	151391783	151391839	5	-2.28074	0.0239002	0.068403	30	151391476	151391647	367	-2.65296	2.50528e-96	4.53505e-94	2593	151391101	151391196	6	-1.90305	0.00179629	0.00726875	65	151390950	151391034	14	-3.34778	2.9192e-08	2.66297e-07	117	ENSG00000181472	-	ZBTB2	1186.64	-1.41076
chr6	151452157	151453282	151452157	151452523	151453212	151453282	151451935	151452189	826	-1.23471	5.66397e-45	3.32276e-43	7059	151452484	151452677	1250	-1.50065	7.21167e-69	7.77796e-67	11516	151453158	151453218	3	-3.06897	0.0103364	0.0335714	24	151453278	151453333	7	-2.46703	0.0196858	0.0580651	25	ENSG00000146476	+	ARMT1	7386.67	-1.44771
chr6	151808067	151808428	151808067	151808135	151808273	151808428	151808020	151808068	6	1.54976	0.0786791	0.179769	22	151808120	151808211	337	0.208268	0.106024	0.226529	1253	151808251	151808307	7	1.11213	0.122257	0.25239	31	151808421	151808486	39	-2.2231	0.000928271	0.00402732	57	ENSG00000091831	+	ESR1	9710.23	-1.00581
chr6	154733295	154734324	154733295	154733415	154734081	154734324	154733245	154733299	11	-0.104042	0.884942	0.940158	36	154733404	154733523	2956	0.143515	0.195652	0.357413	5752	154733787	154734092	15	0.48383	0.153741	0.299622	160	154734324	154734372	79	0.758073	0.0934191	0.20546	93	ENSG00000213079	+	SCAF8	2224.37	0.246635
chr6	157323145	157323633	157323513	157323633	157323145	157323283	157323630	157323682	10	0.683282	0.397241	0.583978	24	157323460	157323539	657	0.160417	0.193175	0.35402	1662	157323266	157323329	8	3.04669	4.91197e-05	0.000277751	44	157323100	157323151	7	2.98377	0.00483759	0.0173866	21	ENSG00000215712	-	TMEM242	275.611	0.417888
chr6	158818234	158819449	158819365	158819449	158818234	158818344	158819446	158819497	5	-1.37524	0.199832	0.3628	18	158819314	158819383	6421	-0.0340143	0.735468	0.850563	22447	158818334	158818386	7	2.03682	0.0018921	0.00761376	45	158818181	158818252	3645	1.27496	2.56987e-42	1.39889e-40	8870	ENSG00000092820	-	EZR	12777.5	0.286198
chr6	159761938	159762508	159761938	159762065	159762319	159762508	159761896	159761939	9	1.60795	0.0803495	0.182671	20	159762020	159762117	891	-0.67672	8.32282e-12	1.08309e-10	4552	159762262	159762325	21	0.48269	0.246864	0.421807	92	159762503	159762559	11	0.594664	0.200296	0.363405	73	ENSG00000120437	+	ACAT2	2492.48	-0.684385
chr6	169702028	169702973	169702028	169702125	169702734	169702973	169701910	169702073	104	-0.0727165	0.611619	0.764295	1100	169702107	169702217	708	0.468732	3.06907e-06	2.13589e-05	4622	169702730	169702804	18	-0.350076	0.340386	0.526203	138	169702971	169703020	7	-0.0699678	0.939624	0.969298	19	ENSG00000185127	+	C6orf120	2440.47	0.400815
chr7	149162	149757	149435	149757	149162	149271	149542	149810	22	-1.72576	1.64905e-08	1.54773e-07	259	149383	149548	80	-0.586762	0.000689499	0.00308252	753	149265	149324	12	0.785839	0.169766	0.322742	54	149028	149184	13	0.116048	0.711569	0.83539	169	ENSG00000242474	-	ENSG00000242474	234.48	-0.40809
chr7	1137055	1138478	1138246	1138478	1137055	1137149	1138470	1138528	3	-0.58384	0.379475	0.565792	41	1138181	1138271	3739	-1.08829	2.35811e-27	7.45774e-26	16787	1137145	1137208	18	1.91287	0.000181531	0.00091623	70	1136931	1137057	3	-0.0391606	0.950364	0.974727	40	ENSG00000146540	-	C7orf50	5873.02	-0.676347
chr7	5423307	5424057	5423833	5424057	5423307	5423421	5424055	5424109	229	1.53186	2.16309e-08	2.00284e-07	259	5423507	5423905	1098	0.828888	3.48845e-28	1.14613e-26	11354	5423419	5423473	10	-0.365548	0.614461	0.766383	32	5423259	5423308	7	-0.719703	0.241216	0.414576	51	ENSG00000182095	-	TNRC18	17441.3	1.16173
chr7	5425588	5425954	5425588	5425764	5425869	5425954	5425543	5425665	7	0.286965	0.612614	0.765036	54	5425654	5425816	203	0.73065	2.42794e-07	1.97829e-06	1060	5425821	5426011	49	0.37624	0.216247	0.384094	187	5425927	5426002	30	0.226018	0.636133	0.782996	71	ENSG00000272953	+	ENSG00000272953	45.1981	1.06032
chr7	5428092	5429170	5428092	5428183	5429006	5429170	5428041	5428098	1135	3.53669	8.75022e-94	1.53149e-91	1334	5428179	5428325	2831	2.99004	3.52879e-170	2.17744e-167	3966	5428957	5429009	12	0.610396	0.376077	0.562363	34	5429171	5429221	5	1.95547	0.0435568	0.112178	20	ENSG00000273084	+	ENSG00000273084	237.894	2.54132
chr7	5528082	5528660	5528578	5528660	5528082	5528282	5528556	5528721	21	1.17485	0.00430474	0.0157106	104	5528527	5528584	1284	0.497889	3.37758e-06	2.33369e-05	4024	5528280	5528336	10	0.799144	0.259741	0.437399	33	5528012	5528116	323	0.732115	1.9531e-05	0.000118688	905	ENSG00000075624	-	ACTB	231140	0.854737
chr7	5528578	5530763	5530600	5530763	5528578	5528660	5530759	5530856	65	2.46372	1.20239e-23	3.21968e-22	377	5530548	5530618	500271	0.803318	7.68746e-21	1.78388e-19	785454	5528556	5528721	21	1.17485	0.00430474	0.0157106	104	5528527	5528584	1284	0.497889	3.37758e-06	2.33369e-05	4024	ENSG00000075624	-	ACTB	231140	0.854737
chr7	32957311	32957933	32957311	32957416	32957866	32957933	32957271	32957319	7	-0.763486	0.51922	0.693085	13	32957383	32957493	1018	-0.993731	1.50598e-28	5.03797e-27	10350	32957707	32957870	90	-0.00325156	0.986254	0.992783	526	32957930	32957980	7	-1.26188	0.152104	0.297291	28	ENSG00000122642	+	FKBP9	2604.67	-0.954195
chr7	35694722	35695247	35695134	35695247	35694722	35694958	35695210	35695301	157	-0.462232	0.000849991	0.00371823	1436	35694832	35695169	767	-0.00959158	0.910229	0.954016	5534	35694938	35695015	7	1.51261	0.00178487	0.00722841	73	35694517	35694724	14	-0.765743	0.108575	0.230638	82	ENSG00000122557	-	HERPUD2	941.076	0.123169
chr7	39949470	39950361	39949470	39949794	39950148	39950361	39949417	39949489	94	0.681539	0.000123591	0.000647009	573	39949658	39949864	359	1.04363	2.85826e-22	7.13393e-21	2388	39950097	39950155	27	1.044	0.0607154	0.146488	59	39950356	39950417	116	-0.141881	0.459104	0.639819	518	ENSG00000065883	+	CDK13	3543.46	0.552625
chr7	43926379	43926784	43926379	43926435	43926707	43926784	43926309	43926407	179	0.224649	0.14425	0.285705	785	43926419	43926505	646	0.309764	0.000984111	0.00424302	3970	43926638	43926736	125	0.842854	2.14194e-08	1.98434e-07	929	43926785	43926849	8	-0.321078	0.7023	0.82934	24	ENSG00000078967	+	UBE2D4	555.214	0.314568
chr7	44884536	44885632	44885488	44885632	44884536	44884562	44885615	44885702	10	0.457397	0.317833	0.50336	77	44885448	44885518	1030	0.367875	0.000128802	0.000671335	6903	44884558	44884609	11	3.24256	0.00194877	0.00781468	25	44884440	44884734	25	0.804397	0.00639653	0.0221996	187	ENSG00000146676	-	PURB	6002.7	0.556826
chr7	45574339	45575029	45574339	45574502	45574951	45575029	45574266	45574351	61	-0.225226	0.369399	0.555571	310	45574355	45574744	78	-1.20718	7.5159e-14	1.14625e-12	1174	45574827	45574957	14	-0.257712	0.574816	0.736589	83	45575025	45575107	58	-1.67518	3.20818e-05	0.00018731	136	ENSG00000164742	+	ADCY1	8286.02	-1.32695
chr7	45574951	45576083	45574951	45575029	45575751	45576083	45574827	45574957	14	-0.257712	0.574816	0.736589	83	45575025	45575107	58	-1.67518	3.20818e-05	0.00018731	136	45575629	45575765	45	-1.37919	7.98569e-05	0.000434134	173	45576084	45576132	7	-1.48585	0.115619	0.241971	24	ENSG00000164742	+	ADCY1	8286.02	-1.32695
chr7	55365984	55366354	55365984	55366042	55366287	55366354	55365865	55366004	42	0.630452	0.00807153	0.0271371	295	55365918	55366116	789	0.735801	6.38936e-11	7.70186e-10	2153	55366208	55366292	11	1.29546	0.00087989	0.00383731	116	55366322	55366437	95	0.152514	0.323486	0.509383	845	ENSG00000132434	+	LANCL2	1288.57	0.212299
chr7	66114757	66115352	66114757	66114849	66115195	66115352	66114682	66114846	81	-0.51866	0.00127778	0.00536763	780	66114821	66114915	562	-0.393318	8.49511e-05	0.000459288	7025	66115141	66115216	57	-0.320612	0.239969	0.412914	249	66115337	66115403	101	-1.73119	2.29429e-09	2.38385e-08	281	ENSG00000241258	+	CRCP	2068.54	-0.294847
chr7	73557235	73557755	73557680	73557755	73557235	73557384	73557752	73557803	5	-0.16692	0.820769	0.903374	30	73557541	73557767	998	0.00649321	0.939234	0.969096	12483	73557359	73557429	5	0.0260982	0.964935	0.982457	48	73557066	73557253	895	0.205602	0.0989149	0.214823	1632	ENSG00000106635	-	BCL7B	1904	-0.142161
chr7	73830839	73832442	73830839	73830997	73832256	73832442	73830788	73830876	16	1.06713	0.0287328	0.0797189	74	73830990	73831046	7689	0.48967	5.69653e-09	5.66544e-08	26148	73832242	73832294	11	2.01496	0.00734041	0.0250183	37	73832411	73832508	278	1.67257	1.779e-30	6.4324e-29	1136	ENSG00000189143	+	CLDN4	16862.5	0.507018
chr7	74657470	74658701	74657470	74657717	74658577	74658701	74657411	74657490	88	0.661539	0.016745	0.0506768	252	74657447	74657905	1354	0.612746	4.27154e-12	5.69736e-11	15793	74658455	74658581	19	2.30313	2.11844e-08	1.96343e-07	118	74658669	74658774	61	3.47751	5.71824e-13	8.18346e-12	130	ENSG00000263001	+	GTF2I	6065.01	0.490196
chr7	76302473	76303702	76302473	76302672	76303610	76303702	76302421	76302478	13	1.42421	0.00826366	0.0276927	58	76302667	76302725	260342	0.185465	0.0412762	0.10738	568888	76303570	76303616	6	-0.0268986	0.979479	0.98917	14	76303598	76303858	5759	-0.427111	1.30162e-08	1.23773e-07	33772	ENSG00000106211	+	HSPB1	58887.5	0.0790116
chr7	76303610	76303995	76303610	76303702	76303853	76303995	76303570	76303616	6	-0.0268986	0.979479	0.98917	14	76303598	76303858	5759	-0.427111	1.30162e-08	1.23773e-07	33772	76303806	76303863	30	0.622774	0.251466	0.427581	54	76303979	76304061	238	-0.0902105	0.591878	0.749229	1452	ENSG00000106211	+	HSPB1	58887.5	0.0790116
chr7	80918424	80919346	80919050	80919346	80918424	80918475	80919257	80919394	150	-0.0183301	0.920905	0.960035	537	80918972	80919191	3184	-0.0418409	0.599873	0.755364	29840	80918475	80918528	8	-1.79919	0.119925	0.248772	17	80918312	80918439	10	-1.80691	0.00177769	0.00720414	67	ENSG00000075223	-	SEMA3C	18920.5	-0.123593
chr7	92245919	92246222	92245919	92246023	92246130	92246222	92245860	92245941	243	-0.315769	0.0145127	0.0449049	1464	92245935	92246125	419	0.253501	0.0140387	0.0436796	3900	92246046	92246151	57	0.169118	0.450502	0.631863	433	92246207	92246296	227	-0.15856	0.254911	0.431795	1226	ENSG00000001629	+	ANKIB1	4655.98	0.102382
chr7	92833497	92834076	92833929	92834076	92833497	92833559	92834039	92834126	11	2.94723	2.71061e-06	1.90177e-05	62	92833778	92833979	344	1.07532	1.46792e-19	3.19496e-18	1677	92833554	92833611	24	3.11277	0.000136166	0.000706021	38	92833451	92833638	86	1.46967	2.7874e-12	3.77742e-11	460	ENSG00000105810	-	CDK6	2418.96	1.33751
chr7	99438797	99439420	99438797	99438945	99439267	99439420	99438705	99438803	341	-0.248634	0.0109745	0.0353116	4245	99438842	99439022	888	-0.0106132	0.902887	0.949732	5138	99439216	99439299	53	-0.129918	0.493912	0.671384	488	99439361	99439491	238	5.7834	1.79596e-135	6.35244e-133	1998	ENSG00000160917	+	CPSF4	4030.99	1.05554
chr7	99499847	99500411	99500280	99500411	99499847	99499899	99500389	99500482	18	-0.895338	0.00140802	0.00584849	236	99500229	99500311	620	0.386375	0.000312499	0.0015027	3446	99499870	99499950	22	0.997542	0.0204006	0.0598294	98	99499782	99499876	10	-0.000631105	0.998648	0.999257	127	ENSG00000160908	-	ZNF394	1306.1	0.318628
chr7	100100742	100101647	100101366	100101647	100100742	100100898	100101556	100101730	381	0.561233	7.42167e-06	4.8549e-05	1668	100101314	100101419	1543	-2.03016	6.3036e-151	2.73272e-148	12595	100100784	100100955	27	-0.372083	0.287329	0.468396	163	100100598	100100785	193	2.37269	2.4932e-71	2.87146e-69	1772	ENSG00000166508	-	MCM7	13472.3	-1.6835
chr7	100428674	100429446	100428674	100428789	100429139	100429446	100428613	100428710	104	-0.564017	0.000308331	0.00148417	949	100428783	100428840	8695	-0.148343	0.0701429	0.164073	9169	100429066	100429146	55	0.121658	0.765838	0.870244	102	100429345	100429497	5699	-0.487084	1.5295e-09	1.61784e-08	9735	ENSG00000146834	+	MEPCE	5787.53	-0.422054
chr7	100429139	100430583	100429139	100429446	100430273	100430583	100429066	100429146	55	0.121658	0.765838	0.870244	102	100429345	100429497	5699	-0.487084	1.5295e-09	1.61784e-08	9735	100430214	100430298	18	-2.07253	9.01301e-05	0.000485024	106	100430487	100430632	5	-1.5728	0.0450973	0.115459	35	ENSG00000146834	+	MEPCE	5787.53	-0.422054
chr7	100435607	100436203	100436031	100436203	100435607	100435763	100436181	100436251	11	0.897349	0.0777458	0.178073	63	100435965	100436174	114	-0.873265	2.95001e-10	3.34203e-09	1564	100435743	100435819	8	0.66362	0.157841	0.305652	74	100435561	100435621	88	-1.50398	9.19557e-05	0.000493842	149	ENSG00000160813	-	PPP1R35	1474.59	-0.699417
chr7	100436031	100436675	100436473	100436675	100436031	100436203	100436662	100436724	7	-0.841177	0.182802	0.339956	50	100436411	100436499	412	-0.603359	5.1552e-07	4.02103e-06	2907	100436181	100436251	11	0.897349	0.0777458	0.178073	63	100435965	100436174	114	-0.873265	2.95001e-10	3.34203e-09	1564	ENSG00000160813	-	PPP1R35	1474.59	-0.699417
chr7	100826746	100827760	100827522	100827760	100826746	100826868	100827636	100827902	192	2.12164	2.0027e-30	7.21964e-29	687	100827355	100827529	3527	1.5355	1.33686e-81	1.87417e-79	9617	100826816	100826894	6	-0.259388	0.633983	0.781418	57	100826700	100826749	7	0.440254	0.673393	0.809403	14	ENSG00000196411	-	EPHB4	12525.2	1.39076
chr7	100874964	100875630	100874964	100875187	100875613	100875630	100874898	100874989	55	0.502095	0.0126527	0.0399541	427	100875073	100875262	991	-0.0321974	0.697088	0.825591	9088	100875562	100875618	38	0.528421	0.206951	0.372309	92	100875626	100875672	22	-0.220265	0.706355	0.831876	49	ENSG00000087087	+	SRRT	8920.69	-0.190008
chr7	101815868	101816745	101815868	101816007	101816682	101816745	101815807	101815909	17	1.35895	0.000194308	0.00097421	131	101815908	101816073	1231	0.68533	2.11801e-13	3.11985e-12	6809	101816633	101816719	62	2.88077	3.22209e-13	4.68736e-12	163	101816716	101816851	15	1.92378	1.04427e-07	8.90082e-07	145	ENSG00000257923	+	CUX1	11044.9	0.689852
chr7	103149321	103149653	103149579	103149653	103149321	103149361	103149649	103149702	9	-2.0481	0.0206979	0.0605376	32	103149441	103149592	74	0.322824	0.229625	0.400411	263	103149335	103149431	40	0.372166	0.106705	0.227685	333	103149181	103149329	24	-0.0474275	0.834493	0.911596	374	ENSG00000161048	-	NAPEPLD	614.509	-0.535001
chr7	105012692	105013198	105013046	105013198	105012692	105012828	105013178	105013343	173	1.01195	1.78635e-09	1.87778e-08	715	105012992	105013065	1056	1.9944	3.8292e-90	6.27337e-88	4411	105012808	105012898	13	1.17572	0.00263616	0.0102277	115	105012631	105012711	31	1.54514	2.91857e-11	3.61926e-10	357	ENSG00000228393	-	LINC01004	325.224	2.1163
chr7	105013046	105013718	105013598	105013718	105013046	105013198	105013692	105013770	52	0.160881	0.701841	0.829025	101	105013547	105013612	8477	1.6601	9.2928e-95	1.65037e-92	13077	105013178	105013343	173	1.01195	1.78635e-09	1.87778e-08	715	105012992	105013065	1056	1.9944	3.8292e-90	6.27337e-88	4411	ENSG00000228393	-	LINC01004	325.224	2.1163
chr7	107580127	107580796	107580127	107580245	107580508	107580796	107580073	107580128	2	-1.9108	0.0354877	0.0948584	30	107580227	107580313	2059	-0.86223	1.21184e-23	3.24397e-22	8686	107580457	107580536	5	0.800468	0.251606	0.427757	32	107580797	107580844	4	-0.51635	0.518812	0.69281	26	ENSG00000075790	+	BCAP29	51.3226	-0.544441
chr7	112450288	112450990	112450288	112450459	112450786	112450990	112450241	112450294	10	2.13037	0.0116309	0.0371358	26	112450455	112450511	2259	-1.04824	2.73808e-16	4.91331e-15	2937	112450738	112450789	4	0.262494	0.739945	0.853509	27	112450985	112451062	9	0.0109677	0.983116	0.991029	60	ENSG00000006652	+	IFRD1	345.173	-0.702888
chr7	128455727	128457615	128455727	128455877	128457538	128457615	128455654	128455764	18	0.362126	0.222455	0.391594	185	128455855	128455999	7776	1.216	2.47087e-57	2.00266e-55	19759	128457489	128457545	6	4.45518	7.84718e-05	0.000427209	36	128457616	128457663	7	-1.25938	0.188417	0.347328	21	ENSG00000273184	+	ENSG00000273184	1.29184	1.5596
chr7	131106393	131108195	131108142	131108195	131106393	131106518	131108184	131108245	14	2.92955	0.00162776	0.00666237	27	131108092	131108150	141	1.51004	4.90338e-15	8.10703e-14	523	131106508	131106570	2	2.50813	0.026695	0.075003	16	131106346	131106398	4	0.30956	0.698115	0.826275	25	ENSG00000231721	-	LINC-PINT	38.777	1.12461
chr7	133034906	133035523	133035276	133035523	133034906	133035038	133035504	133035568	3	0.147579	0.946252	0.97253	21	133035228	133035442	40	-0.0842826	0.724015	0.843499	372	133035039	133035086	11	1.49559	0.215934	0.383695	13	133034858	133034912	4	-0.706042	0.501301	0.6781	18	ENSG00000284135	-	MIR3654	0	NA
chr7	139341259	139341819	139341259	139341352	139341686	139341819	139341205	139341261	2	-1.76793	0.0842589	0.189585	22	139341295	139341404	957	-0.531439	1.63571e-08	1.53606e-07	8358	139341639	139341716	20	-0.642189	0.148767	0.292266	89	139341813	139341873	6	-1.07829	0.0942551	0.206965	51	ENSG00000164898	+	FMC1	112.916	-0.439954
chr7	139359693	139360580	139359693	139359929	139360415	139360580	139359642	139359699	337	0.896345	5.09798e-07	3.97861e-06	612	139359903	139360008	691	0.00888178	0.914508	0.956319	9454	139360167	139360443	35	1.35478	1.40979e-06	1.03193e-05	220	139360574	139360633	25	0.265817	0.626941	0.77591	53	ENSG00000146963	+	LUC7L2	1752.07	-0.0111627
chr7	149126276	149126916	149126276	149126407	149126815	149126916	149126209	149126314	198	1.35939	9.38061e-27	2.89521e-25	2283	149126376	149126534	244	0.983824	2.35563e-10	2.68993e-09	1014	149126772	149126821	8	2.17153	0.0144136	0.044644	27	149126854	149126941	15	-0.288859	0.482642	0.661401	104	ENSG00000197024	+	ZNF398	1179.84	0.155196
chr7	149261918	149262615	149261918	149261998	149262507	149262615	149261866	149261924	7	-1.43236	0.0362918	0.0966076	46	149261991	149262093	95	0.266132	0.136426	0.273902	609	149262490	149262542	9	0.916949	0.0987879	0.214599	56	149262613	149262662	20	-0.850911	0.24362	0.41758	34	ENSG00000204946	+	ZNF783	929.794	-0.328233
chr7	149772736	149773509	149773184	149773509	149772736	149773084	149773503	149773560	5	-0.0489283	0.965451	0.982603	12	149773175	149773243	50	-0.704941	0.0144597	0.0447752	234	149773058	149773168	47	0.137695	0.594598	0.751514	265	149772695	149772798	19	-0.867704	0.00989393	0.0323306	173	ENSG00000181444	-	ZNF467	1506.76	-0.775988
chr7	149773184	149773726	149773587	149773726	149773184	149773509	149773700	149773774	25	-0.0478129	0.928317	0.963449	65	149773388	149773600	118	-0.712082	8.96993e-07	6.7559e-06	1139	149773503	149773560	5	-0.0489283	0.965451	0.982603	12	149773175	149773243	50	-0.704941	0.0144597	0.0447752	234	ENSG00000181444	-	ZNF467	1506.76	-0.775988
chr7	150368723	150369091	150368723	150368821	150369020	150369091	150368670	150368729	3	-2.76769	0.00714821	0.0244539	31	150368791	150368900	1072	-0.835395	1.11204e-17	2.18368e-16	5639	150368973	150369043	16	-0.776091	0.148546	0.291957	70	150369084	150369182	101	-0.873831	0.000197967	0.000990728	446	ENSG00000214022	+	REPIN1	4768.9	-0.962266
chr7	151232415	151233371	151232415	151232498	151233277	151233371	151232341	151232421	6	-0.577377	0.403057	0.589893	36	151232462	151232551	1123	0.997064	1.6739e-24	4.66858e-23	4254	151233227	151233281	8	0.231321	0.761691	0.867527	28	151233359	151233419	5	1.39828	0.0943731	0.207159	24	ENSG00000033100	+	CHPF2	4628.16	1.21342
chr7	155644179	155644493	155644395	155644493	155644179	155644246	155644468	155644548	152	0.400653	0.00180897	0.00731478	1275	155644268	155644404	363	-0.0242107	0.869203	0.931445	1026	155644203	155644258	4	-0.607097	0.456367	0.637205	27	155644107	155644195	57	0.780646	0.00145124	0.00601147	298	ENSG00000283128	-	ENSG00000283128	14.1564	0.864038
chr7	157336928	157337873	157336928	157337005	157337749	157337873	157336869	157336942	29	1.24381	7.96734e-06	5.18218e-05	239	157336987	157337064	3433	0.245147	0.00246014	0.00961269	11024	157337709	157337753	35	5.85504	1.03929e-07	8.86067e-07	54	157337803	157337923	29	4.07833	2.36878e-09	2.45641e-08	82	ENSG00000105993	+	DNAJB6	5618	1.04487
chr7	158827592	158829698	158829508	158829698	158827592	158827727	158829684	158829866	48	1.57692	1.46555e-11	1.8678e-10	348	158829433	158829538	11201	1.36204	1.63353e-55	1.25997e-53	23555	158827723	158827774	8	3.69913	0.00503502	0.018015	13	158827543	158827597	10	3.23221	0.00960553	0.0315325	16	ENSG00000117868	-	ESYT2	9562.25	1.24677
chr8	17496878	17498756	17496878	17497090	17498574	17498756	17496832	17496893	17	-0.36614	0.498748	0.675654	57	17497073	17497141	6795	-0.592411	3.60595e-17	6.87334e-16	21265	17498525	17498588	6	2.54457	0.00162698	0.0066598	32	17498753	17498808	27	1.27973	0.0156437	0.0478491	65	ENSG00000003989	+	SLC7A2	23188.7	-0.773149
chr8	17801237	17801576	17801237	17801343	17801520	17801576	17801054	17801265	314	-0.317803	0.00269108	0.010413	2485	17801325	17801518	410	2.39725	1.20164e-32	4.7535e-31	640	17801321	17801559	37	0.416165	0.0947205	0.207739	296	17801574	17801654	15	1.28185	0.00577722	0.0203197	80	ENSG00000253944	+	ENSG00000253944	43.5311	3.35058
chr8	18084330	18085029	18084960	18085029	18084330	18084432	18085024	18085079	14	-1.48744	0.0272607	0.0763244	48	18084751	18084985	66	0.0236006	0.916788	0.957684	386	18084414	18084476	4	0.560932	0.471285	0.650809	27	18084273	18084337	8	0.342049	0.515456	0.690159	57	ENSG00000104763	-	ASAH1	3242.12	0.283052
chr8	23068616	23069171	23068991	23069171	23068616	23068682	23069172	23069220	12	1.46417	0.0936779	0.205936	22	23068942	23069088	4523	2.71731	4.88409e-278	1.52919e-274	14022	23068680	23068729	10	2.62701	0.0091506	0.0302501	22	23068570	23068622	9	3.9208	0.000767929	0.00339119	25	ENSG00000120889	-	TNFRSF10B	8127.07	2.63257
chr8	29348990	29350973	29350681	29350973	29348990	29349102	29350906	29351056	233	3.09441	4.18944e-62	3.83289e-60	892	29350623	29350688	4152	1.55772	2.21665e-66	2.24415e-64	12617	29349099	29349150	4	1.51365	0.0685406	0.161128	25	29348944	29348993	8	1.43374	0.0403875	0.105497	36	ENSG00000120875	-	DUSP4	13281.7	1.54918
chr8	37695759	37696749	37695759	37695782	37696637	37696749	37695715	37695767	8	1.56989	0.125264	0.256823	16	37695771	37695837	12786	-0.159681	0.100058	0.216643	45172	37696566	37696643	24	0.795859	0.0200499	0.0589666	144	37696734	37697028	76	-0.77783	3.43237e-07	2.74434e-06	1125	ENSG00000183779	+	ZNF703	6800.46	-0.156441
chr8	38105442	38105928	38105442	38105528	38105776	38105928	38105312	38105450	46	-1.23901	0.000195615	0.000980232	203	38105513	38105590	2001	0.074264	0.466212	0.646021	5405	38105714	38105797	17	-0.118952	0.793614	0.887221	87	38105902	38105976	24	-1.41905	0.000185879	0.00093619	154	ENSG00000129691	+	ASH2L	1323.51	-0.0825021
chr8	42541503	42541828	42541710	42541828	42541503	42541648	42541780	42541878	119	0.159334	0.358283	0.54381	622	42541657	42541732	1673	0.648886	6.54069e-11	7.87529e-10	3838	42541609	42541701	666	-0.148836	0.101575	0.219063	4528	42541450	42541598	51	-0.339061	0.208993	0.375055	282	ENSG00000168575	-	SLC20A2	1811.84	0.845442
chr8	42896722	42897370	42896722	42896977	42897293	42897370	42896527	42896843	102	0.43907	0.000896087	0.0039015	1494	42896922	42897030	400	0.414866	1.98983e-05	0.000120738	4861	42897243	42897306	8	-0.787336	0.191703	0.351993	52	42897319	42897419	14	0.587771	0.197787	0.360244	75	ENSG00000168172	+	HOOK3	961.881	0.247004
chr8	65841455	65842165	65842063	65842165	65841455	65841695	65842160	65842214	14	-0.373561	0.455791	0.636723	68	65841981	65842074	509	0.766625	6.04395e-12	7.96713e-11	2584	65841696	65841720	15	0.277749	0.780927	0.879785	17	65841454	65841514	6	-0.78938	0.274205	0.45357	36	ENSG00000205268	-	PDE7A	1706.6	0.386695
chr8	66712691	66713020	66712691	66712780	66712993	66713020	66712568	66712692	7	0.751232	0.138135	0.276578	65	66712663	66712840	56	-0.170262	0.266889	0.445602	1003	66712946	66713029	9	-0.746117	0.169224	0.321949	62	66712984	66713035	5	0.073062	0.921196	0.960091	34	ENSG00000104205	+	SGK3	235.435	-0.828341
chr8	67343337	67343808	67343780	67343808	67343337	67343430	67343802	67343861	7	0.640752	0.358403	0.543887	33	67343729	67343970	707	-0.0612464	0.537059	0.707741	2965	67343404	67343510	18	0.0236821	0.944483	0.971721	152	67343287	67343373	134	-0.677678	0.000463273	0.00215336	544	ENSG00000066777	-	ARFGEF1	3001.26	-0.0844366
chr8	70402452	70403584	70403562	70403584	70402452	70402513	70403574	70403634	4	0.649398	0.413758	0.599881	26	70403510	70403587	32	-1.08395	0.00545687	0.0193199	130	70402476	70402583	28	1.78384	1.38037e-05	8.62843e-05	115	70402406	70402461	15	-0.922383	0.125689	0.257451	53	ENSG00000140396	-	NCOA2	2322.13	-0.250904
chr8	70403562	70403903	70403804	70403903	70403562	70403584	70403882	70403952	33	0.176773	0.637637	0.784253	115	70403743	70403823	698	-0.300532	0.00331488	0.0125023	2920	70403574	70403634	4	0.649398	0.413758	0.599881	26	70403510	70403587	32	-1.08395	0.00545687	0.0193199	130	ENSG00000140396	-	NCOA2	2322.13	-0.250904
chr8	79767831	79768273	79767831	79768061	79768075	79768273	79767759	79767834	26	0.17586	0.63113	0.77913	150	79768051	79768124	33	2.71185	8.90247e-13	1.25409e-11	165	79768028	79768088	3	1.81204	0.0187376	0.0557472	29	79768270	79768489	14	-0.621473	0.198558	0.361215	92	ENSG00000272138	+	LINC01607	17.4416	2.33483
chr8	86342340	86344635	86342340	86342737	86344427	86344635	86342294	86342358	15	-0.781062	0.166703	0.318429	60	86342520	86342902	2334	-0.646358	2.86765e-13	4.19048e-12	22603	86344267	86344432	24	-2.26061	2.7754e-06	1.94336e-05	118	86344633	86344685	14	-3.83395	0.000615966	0.0027856	40	ENSG00000123124	+	WWP1	6324.24	-0.17048
chr8	90645695	90646219	90646082	90646219	90645695	90645833	90646180	90646342	18	-0.0183366	0.96194	0.980824	113	90646005	90646115	1349	-0.491915	1.89824e-06	1.36106e-05	5558	90645822	90645903	29	2.36876	1.75975e-13	2.61307e-12	200	90645524	90645736	640	0.413876	2.59036e-06	1.82239e-05	5025	ENSG00000180694	-	TMEM64	21643.2	-0.30466
chr8	90791667	90793496	90791667	90791779	90793308	90793496	90791581	90791679	11	-1.82386	3.46465e-06	2.38858e-05	155	90791653	90791845	561	-1.1058	3.80005e-37	1.75733e-35	6516	90793259	90793311	4	-4.19549	0.00118023	0.00499935	18	90793493	90793546	7	-3.8305	0.00186978	0.00753511	24	ENSG00000123119	+	NECAB1	3249	-1.48118
chr8	90858786	90859528	90859241	90859528	90858786	90859074	90859354	90859598	373	-1.68429	1.67287e-52	1.21019e-50	2678	90859097	90859343	2786	-1.31246	5.58414e-55	4.24515e-53	9075	90859071	90859121	45	-2.13861	0.000221504	0.00109747	88	90858739	90858787	4	-1.15222	0.179067	0.335044	27	ENSG00000254251	-	ENSG00000254251	754.924	-1.71936
chr8	92965588	92966263	92966073	92966263	92965588	92965771	92966250	92966312	14	-1.78395	0.0119963	0.0381535	44	92966021	92966117	1367	0.201146	0.00761562	0.0258137	10768	92965746	92965849	64	0.056483	0.798117	0.889889	354	92965529	92965597	176	0.950609	2.88022e-05	0.00016958	341	ENSG00000205133	-	TRIQK	3731.97	0.128216
chr8	93740594	93741201	93740984	93741201	93740594	93740684	93741202	93741253	17	1.17712	0.0790986	0.180516	38	93740934	93741037	856	-0.511816	4.49312e-08	4.00623e-07	5936	93740680	93740732	10	1.62562	0.165363	0.316449	13	93740543	93740601	17	1.13054	0.0816661	0.185031	37	ENSG00000183808	-	RBM12B	1878.55	-0.711172
chr8	93916680	93917838	93916680	93916946	93917681	93917838	93916601	93916692	11	-0.29382	0.507399	0.683068	89	93916902	93917000	391	-0.480099	5.87798e-06	3.91138e-05	3618	93917632	93917687	14	0.892224	0.274315	0.453681	26	93917839	93917893	3	0.914058	0.340244	0.52606	17	ENSG00000164951	+	PDP1	861.401	-0.461325
chr8	100212901	100213652	100212901	100213085	100213524	100213652	100212854	100212910	6	2.87923	0.00791548	0.0266835	20	100212958	100213226	732	0.375562	0.000351824	0.00167182	2816	100213475	100213546	9	2.53066	0.00035007	0.00166443	43	100213621	100213710	35	5.2885	9.30306e-22	2.25925e-20	241	ENSG00000104450	+	SPAG1	1856.19	0.338418
chr8	100309374	100310264	100309942	100310264	100309374	100309521	100310239	100310391	36	1.54969	1.53391e-11	1.94901e-10	337	100309866	100310129	1152	1.45585	4.75172e-65	4.64383e-63	8571	100309503	100309574	27	3.4599	2.51855e-12	3.42517e-11	120	100309327	100309375	12	3.15708	2.02774e-05	0.000122845	46	ENSG00000034677	-	RNF19A	4961.77	1.54075
chr8	100950567	100951462	100951277	100951462	100950567	100950702	100951460	100951605	19	1.14508	0.0047414	0.0170918	104	100951225	100951531	254	-1.52466	1.92037e-42	1.05143e-40	2633	100950698	100950755	174	0.849412	0.000128073	0.00066791	351	100950415	100950575	69	0.45706	0.0283221	0.0787968	392	ENSG00000164924	-	YWHAZ	48916.9	0.26855
chr8	100951277	100952255	100952016	100952255	100951277	100951462	100952156	100952329	45	0.547699	0.00459981	0.0166485	590	100951958	100952111	20567	0.276119	0.00305193	0.0116351	99523	100951460	100951605	19	1.14508	0.0047414	0.0170918	104	100951225	100951531	254	-1.52466	1.92037e-42	1.05143e-40	2633	ENSG00000164924	-	YWHAZ	48916.9	0.26855
chr8	101204755	101205879	101205647	101205879	101204755	101204841	101205867	101206199	645	1.38115	1.79215e-25	5.2134e-24	1458	101205499	101205681	3148	0.583218	1.25803e-11	1.61233e-10	46770	101204836	101204890	92	1.78543	9.87077e-12	1.27609e-10	275	101204709	101204769	8	1.77738	0.0222741	0.0644124	29	ENSG00000120963	-	ZNF706	1523.35	0.918524
chr8	101492297	101492774	101492297	101492438	101492551	101492774	101492235	101492306	1730	-0.108038	0.208062	0.373847	7968	101492427	101492485	3675	-0.543784	4.17892e-12	5.58e-11	12000	101492490	101492713	584	1.14659	8.90632e-29	3.00921e-27	3263	101492752	101492853	415	0.0195205	0.850169	0.921029	2581	ENSG00000083307	+	GRHL2	6048.79	-0.249974
chr8	102236794	102239215	102238912	102239215	102236794	102236897	102239163	102239221	5	4.0627	0.000422445	0.00197893	27	102238678	102239063	2699	3.24298	1.0979e-284	3.86716e-281	23686	102236894	102236973	37	7.59157	4.35084e-13	6.27328e-12	180	102236745	102236801	27	4.55109	4.42956e-08	3.95289e-07	76	ENSG00000048392	-	RRM2B	26092.7	3.3362
chr8	102654166	102655890	102655722	102655890	102654166	102654342	102655890	102655940	11	0.27479	0.683678	0.816735	37	102655669	102655738	4592	0.267317	0.00285294	0.010958	10077	102654337	102654478	18	1.68638	1.86808e-06	1.34137e-05	151	102654114	102654170	20	1.50832	0.0215811	0.0626999	40	ENSG00000155090	-	KLF10	2988.59	0.341387
chr8	102806463	102807036	102806463	102806679	102806815	102807036	102806412	102806488	13	0.602729	0.174218	0.328728	86	102806559	102806718	14	-0.152317	0.652404	0.794597	153	102806743	102806822	4	-0.10327	0.857626	0.925311	51	102806923	102807164	14	-0.650582	0.042172	0.109244	184	ENSG00000253669	+	GASAL1	211.913	0.317976
chr8	102806815	102807740	102806815	102807036	102807431	102807740	102806743	102806822	4	-0.10327	0.857626	0.925311	51	102806923	102807164	14	-0.650582	0.042172	0.109244	184	102807382	102807622	14	-2.23313	2.06103e-07	1.69849e-06	144	102807735	102807781	6	-2.1737	0.01141	0.0365197	35	ENSG00000253669	+	GASAL1	211.913	0.317976
chr8	103298821	103299584	103298821	103298875	103299256	103299584	103298673	103298850	497	2.45348	2.98365e-92	5.06478e-90	2124	103298751	103298949	1830	0.976006	2.40677e-33	9.70702e-32	7146	103299180	103299380	17	2.74963	9.9517e-16	1.72322e-14	207	103299585	103299632	16	0.876586	0.240975	0.414298	31	ENSG00000164930	+	FZD6	4643.97	0.958339
chr8	109539464	109540183	109539464	109539849	109540115	109540183	109539444	109539505	5	1.50779	0.010506	0.0340372	57	109539712	109539920	723	0.281026	0.00461734	0.0166973	6449	109540067	109540122	7	0.640513	0.350327	0.536023	38	109540125	109540223	308	-1.56928	3.09311e-36	1.38569e-34	2001	ENSG00000147654	+	EBAG9	1562.27	-0.381017
chr8	109540115	109540621	109540115	109540183	109540513	109540621	109540067	109540122	7	0.640513	0.350327	0.536023	38	109540125	109540223	308	-1.56928	3.09311e-36	1.38569e-34	2001	109540466	109540528	12	0.641917	0.266595	0.445278	50	109540612	109540683	19	-0.497391	0.350727	0.536333	61	ENSG00000147654	+	EBAG9	1562.27	-0.381017
chr8	115666357	115668184	115668012	115668184	115666357	115666544	115668184	115668236	15	-1.00145	0.212946	0.380021	30	115667939	115668030	239	-1.39076	1.66437e-19	3.60951e-18	1074	115666537	115666597	8	0.297043	0.743475	0.855711	23	115666309	115666432	4	-0.440767	0.598845	0.754691	25	ENSG00000104447	-	TRPS1	4734.83	-0.0155628
chr8	119208237	119209140	119208237	119208377	119209006	119209140	119208165	119208260	7	1.30378	0.0102867	0.033446	66	119208329	119208448	7365	0.513559	3.48726e-12	4.69126e-11	37486	119208960	119209008	5	0.254514	0.789636	0.884916	19	119208996	119209194	43	-0.985958	0.000601576	0.00272621	236	ENSG00000147676	+	MAL2	16922.8	0.385696
chr8	122781603	122782622	122781603	122781654	122782302	122782622	122781545	122781609	10	-1.72921	0.0121034	0.038452	49	122781297	122781811	72	-2.18786	4.51215e-26	1.35166e-24	666	122782252	122782307	17	-1.20067	0.0738075	0.170966	45	122782584	122782673	14	-0.891126	0.00763299	0.0258653	173	ENSG00000178764	+	ZHX2	841.628	-1.70708
chr8	123273976	123274953	123274568	123274953	123273976	123274026	123274946	123275001	12	-0.459277	0.465228	0.645252	42	123274213	123274600	484	-0.930662	9.86563e-28	3.1711e-26	8116	123274021	123274080	5	-0.472319	0.569009	0.732242	28	123273931	123274013	8	-0.865641	0.180638	0.337072	45	ENSG00000165156	-	ZHX1	3540.65	-0.956144
chr8	124474563	124475088	124474563	124474766	124474964	124475088	124474490	124474582	47	0.499006	0.0575453	0.140487	265	124474694	124474790	274	0.859888	1.5094e-12	2.09007e-11	2188	124474912	124474994	8	1.49367	0.00568376	0.0200259	62	124475047	124475148	52	-1.40182	1.62517e-13	2.41875e-12	692	ENSG00000170881	+	RNF139	3360.09	-0.232351
chr8	126557079	126558627	126558390	126558627	126557079	126557130	126558624	126558685	72	1.3175	1.9734e-05	0.00011981	190	126558321	126558492	5650	0.652655	6.02882e-20	1.33767e-18	30933	126557098	126557156	5	1.72123	0.0774071	0.177456	21	126557034	126557082	10	-0.724488	0.520678	0.694215	16	ENSG00000168672	-	LRATD2	11259.2	0.5724
chr8	127736120	127737773	127736120	127736230	127737650	127737773	127736074	127736149	17	-1.62119	0.00656768	0.0227208	61	127736222	127736308	1876	-1.00262	2.78815e-21	6.61518e-20	4472	127737510	127737659	10	1.73494	1.61692e-05	9.98087e-05	120	127737754	127737845	67	-0.490175	0.0187295	0.0557284	474	ENSG00000136997	+	MYC	2098.51	-0.950467
chr8	127737650	127738819	127737650	127737773	127738707	127738819	127737510	127737659	10	1.73494	1.61692e-05	9.98087e-05	120	127737754	127737845	67	-0.490175	0.0187295	0.0557284	474	127738662	127738739	10	2.18481	1.0136e-05	6.47078e-05	89	127738820	127738869	12	-1.01199	0.170795	0.324067	33	ENSG00000136997	+	MYC	2098.51	-0.950467
chr8	127794373	127795821	127794373	127794540	127795706	127795821	127794329	127794461	28	-1.03035	0.00015943	0.000814207	286	127794509	127794612	1051	-0.0638435	0.50791	0.683498	4292	127795661	127795737	45	4.16987	2.79591e-11	3.47326e-10	103	127795795	127796133	211	3.80497	1.14063e-132	3.81125e-130	1911	ENSG00000249859	+	PVT1	3445.99	1.65039
chr8	133570632	133572200	133571886	133572200	133570632	133570704	133572160	133572336	1368	2.42858	4.43198e-125	1.35257e-122	3476	133571815	133572027	2182	1.33019	1.83819e-60	1.61029e-58	10012	133570705	133570798	9	2.71976	1.20678e-05	7.61714e-05	59	133570578	133570638	3	2.35765	0.00455841	0.0165195	29	ENSG00000008513	-	ST3GAL1	11360.5	1.44617
chr8	134712620	134713150	134713143	134713150	134712620	134712708	134713118	134713198	13	-0.0160633	0.974769	0.986532	61	134712976	134713150	120	1.35531	4.31519e-22	1.06632e-20	1214	134712687	134712758	14	1.68024	0.00223647	0.0088248	61	134712545	134712627	7	-3.05382	0.00329209	0.0124271	36	ENSG00000066827	-	ZFAT	710.382	1.27768
chr8	140511255	140512102	140511255	140511333	140511719	140512102	140511116	140511281	89	-0.149069	0.399635	0.58653	609	140511289	140511386	721	-0.797227	1.32834e-16	2.43215e-15	4770	140511557	140511942	36	0.477918	0.0115738	0.0369724	504	140512090	140512162	178	-1.00733	2.56797e-05	0.000152651	350	ENSG00000104472	+	CHRAC1	1016.41	-1.27715
chr8	142727055	142728373	142727055	142727249	142728369	142728373	142726931	142727125	243	0.231896	0.10575	0.226094	1000	142727215	142727328	1127	0.319391	0.000157837	0.00080685	8693	142728302	142728381	47	0.913593	0.005956	0.0208643	159	142728373	142728419	8	2.88592	0.0261059	0.0735852	13	ENSG00000130193	+	THEM6	8106.64	0.273719
chr8	143368545	143369480	143368545	143368875	143369399	143369480	143368494	143368652	96	-1.43721	6.19339e-16	1.08578e-14	923	143368839	143368928	3362	-0.325849	0.000928098	0.00402678	11406	143369354	143369404	3	0.289586	0.748059	0.858689	21	143369474	143369532	4	0.325029	0.560004	0.725469	51	ENSG00000158106	+	RHPN1	5788.13	-0.505409
chr8	143596462	143597239	143597137	143597239	143596462	143596617	143597222	143597376	46	-0.778794	0.0537662	0.133114	121	143597077	143597177	68	-1.34835	2.38607e-17	4.60313e-16	917	143596618	143596669	5	2.40328	0.0369965	0.0981497	15	143596408	143596465	10	1.48533	0.0563822	0.138218	28	ENSG00000104529	-	EEF1D	25193.6	0.697968
chr8	143597137	143597832	143597618	143597832	143597137	143597239	143597817	143597983	100	-1.69115	1.34979e-23	3.60639e-22	1196	143597560	143597646	229	-0.111313	0.432781	0.616548	1052	143597222	143597376	46	-0.778794	0.0537662	0.133114	121	143597077	143597177	68	-1.34835	2.38607e-17	4.60313e-16	917	ENSG00000104529	-	EEF1D	25193.6	0.697968
chr8	143738030	143738632	143738533	143738632	143738030	143738150	143738594	143738654	5	2.15371	0.0207619	0.0607016	22	143738381	143738644	605	2.61251	4.53909e-101	9.00742e-99	2276	143738148	143738198	6	1.37772	0.208821	0.374847	15	143737974	143738036	68	1.36677	0.000525991	0.00241698	109	ENSG00000180921	-	FAM83H	18226.5	0.697403
chr8	143771347	143771838	143771673	143771838	143771347	143771485	143771822	143771965	15	3.69385	4.99791e-14	7.71414e-13	138	143771549	143771962	165	1.19604	4.09805e-15	6.81016e-14	869	143771462	143771559	58	0.00786168	0.973004	0.985784	339	143771306	143771357	12	0.000901074	0.998837	0.99931	44	ENSG00000254973	-	ENSG00000254973	58.5952	2.13446
chr8	143829040	143829543	143829338	143829543	143829040	143829078	143829474	143829630	50	-0.695762	0.0229951	0.0661759	229	143829273	143829355	3423	0.0407862	0.627713	0.776476	17863	143829064	143829150	43	-0.855241	0.0114807	0.0367166	175	143828981	143829069	133	-1.58874	1.40186e-12	1.9453e-11	504	ENSG00000179950	-	PUF60	7862.63	-0.596032
chr8	144094943	144096207	144094943	144095075	144096066	144096207	144094894	144094948	27	2.9467	0.000425796	0.00199342	35	144095049	144095137	3577	-0.575194	8.39135e-10	9.09334e-09	29154	144096016	144096150	149	-0.405746	0.0447576	0.114714	467	144096176	144096258	216	-0.727277	0.000773721	0.00341392	468	ENSG00000179091	+	CYC1	8002.27	-0.601705
chr8	144104249	144104948	144104249	144104495	144104842	144104948	144104090	144104277	90	-0.522306	0.000828775	0.00363502	867	144104364	144104595	4488	0.214069	0.0141986	0.0440944	22080	144104813	144104910	101	1.3959	2.89345e-17	5.54777e-16	725	144104939	144105114	34	-0.0951867	0.72147	0.84172	249	ENSG00000179632	+	MAF1	6058.66	0.0541777
chr8	144147771	144148653	144147771	144148035	144148600	144148653	144147664	144147789	133	1.48054	3.67869e-20	8.25323e-19	955	144148004	144148088	419	0.00259292	0.982478	0.990746	1640	144148524	144148620	24	1.57516	2.11288e-06	1.50768e-05	162	144148643	144148716	21	1.84437	9.05052e-05	0.000486826	85	ENSG00000179832	+	MROH1	4959.04	0.402314
chr8	144357625	144358612	144358471	144358612	144357625	144357733	144358589	144358666	636	-0.416117	0.000399746	0.00188083	3063	144358419	144358573	729	-0.992259	6.2078e-20	1.37594e-18	3836	144357722	144357799	13	-0.716914	0.103357	0.222104	93	144357579	144357629	13	-1.8667	0.0668548	0.15796	24	ENSG00000182325	-	FBXL6	1950.78	-0.811989
chr8	144412942	144413703	144413584	144413703	144412942	144413234	144413695	144413771	6	-1.86733	0.0059124	0.0207332	52	144413508	144413592	1726	-0.785975	2.52378e-20	5.71524e-19	5956	144413204	144413310	48	-0.164864	0.52319	0.696093	286	144412877	144412947	41	-1.22178	0.00558029	0.0197107	103	ENSG00000147804	-	SLC39A4	755.497	-0.861194
chr9	214823	215173	214823	214867	215082	215173	214750	214847	35	1.2698	2.37255e-05	0.000141783	191	214847	214920	571	1.29727	3.31677e-25	9.53695e-24	1446	214936	215112	62	0.515268	0.00609263	0.0212768	521	215149	215251	41	-0.0221514	0.917648	0.958205	397	ENSG00000107099	+	DOCK8	1981.13	0.795712
chr9	2015072	2016776	2015072	2015346	2016607	2016776	2015024	2015073	8	-0.620856	0.427228	0.611433	30	2015263	2015412	513	-1.30062	1.14028e-16	2.10193e-15	1398	2016542	2016608	8	-2.68796	0.000286662	0.00138928	56	2016736	2016789	6	-1.55494	0.0352669	0.0943575	39	ENSG00000080503	+	SMARCA2	2007.78	-1.35758
chr9	3526410	3526703	3526410	3526484	3526702	3526703	3526356	3526418	32	0.28759	0.47876	0.657703	112	3526455	3526562	231	1.40375	4.58986e-15	7.60317e-14	621	3526654	3526727	25	0.43483	0.226721	0.396862	123	3526696	3526750	8	-1.10583	0.159343	0.307891	31	ENSG00000232104	+	RFX3-AS1	48.5225	2.24295
chr9	5832502	5833204	5833089	5833204	5832502	5832648	5833203	5833257	9	0.514875	0.464893	0.644995	35	5832924	5833125	1408	1.50643	6.52231e-85	9.72434e-83	18477	5832464	5832781	246	2.01322	8.67798e-31	3.19096e-29	752	5832453	5832525	293	1.88189	6.18925e-23	1.59907e-21	634	ENSG00000099219	-	ERMP1	16909.2	1.56736
chr9	33442354	33443275	33442971	33443275	33442354	33442628	33443270	33443323	6	2.88259	0.0282376	0.0785952	13	33442796	33443087	985	3.33956	2.61609e-139	9.78557e-137	2743	33442629	33442679	13	3.19279	0.0161277	0.0490821	16	33442308	33442543	17	3.17694	4.1775e-14	6.48337e-13	149	ENSG00000165272	-	AQP3	12945.1	3.33832
chr9	35731969	35732606	35732372	35732606	35731969	35732321	35732516	35732680	521	-0.852471	1.99144e-19	4.29899e-18	4819	35732098	35732407	1113	0.0685493	0.449895	0.631305	9549	35732300	35732385	21	1.15368	0.00616675	0.0214983	101	35731923	35731997	57	-0.121542	0.678827	0.813215	198	ENSG00000137076	-	TLN1	6279.88	0.101033
chr9	35748997	35749286	35749206	35749286	35748997	35749116	35749279	35749391	106	-0.325887	0.0186591	0.055547	1209	35749144	35749248	861	0.164041	0.0453969	0.116114	5930	35749089	35749177	31	0.237232	0.39239	0.579084	232	35748932	35749026	22	0.373825	0.241873	0.415409	158	ENSG00000070610	-	GBA2	1893.97	0.135916
chr9	36400268	36400621	36400430	36400621	36400268	36400366	36400611	36400670	21	4.67917	3.68072e-07	2.93043e-06	61	36400384	36400441	49	1.155	0.000270531	0.0013173	171	36400346	36400397	6	0.484581	0.587685	0.746144	21	36400221	36400270	9	-1.35037	0.220886	0.389569	17	ENSG00000137075	-	RNF38	936.198	0.557993
chr9	76393764	76394072	76394004	76394072	76393764	76393871	76394049	76394111	4	-0.73242	0.315976	0.501225	36	76393921	76394031	28	3.50746	2.07061e-14	3.28346e-13	143	76393865	76393923	10	0.70674	0.309577	0.494043	36	76393715	76393767	5	2.06964	0.0483886	0.122226	17	ENSG00000135002	-	RFK	2745	1.53791
chr9	76394004	76394563	76394396	76394563	76394004	76394072	76394561	76394615	7	-0.751922	0.239164	0.411822	42	76394233	76394537	1175	1.6012	1.63406e-57	1.33466e-55	9078	76394049	76394111	4	-0.73242	0.315976	0.501225	36	76393921	76394031	28	3.50746	2.07061e-14	3.28346e-13	143	ENSG00000135002	-	RFK	2745	1.53791
chr9	77647988	77648401	77648315	77648401	77647988	77648127	77648276	77648685	143	1.33952	7.68388e-35	3.28561e-33	2789	77648263	77648421	322	1.4299	5.27927e-35	2.27234e-33	1821	77648092	77648154	6	1.34849	0.0642715	0.153166	32	77647943	77647993	6	1.49213	0.13352	0.269448	18	ENSG00000156049	-	GNA14	1829.27	1.34374
chr9	81686991	81688691	81688636	81688691	81686991	81687209	81688662	81688717	8	2.58912	0.00123901	0.0052206	33	81688459	81688894	99	1.52044	4.82062e-19	1.02058e-17	701	81687113	81687296	59	2.34809	5.16701e-14	7.96642e-13	216	81686942	81687100	7	1.27298	0.0488083	0.1231	40	ENSG00000196781	-	TLE1	7788.64	0.863897
chr9	81688636	81689828	81689546	81689828	81688636	81688691	81689826	81689875	19	3.55284	5.21488e-05	0.000293154	40	81689467	81689647	13188	0.912233	1.65948e-26	5.059e-25	41071	81688662	81688717	8	2.58912	0.00123901	0.0052206	33	81688459	81688894	99	1.52044	4.82062e-19	1.02058e-17	701	ENSG00000196781	-	TLE1	7788.64	0.863897
chr9	83062971	83063255	83063141	83063255	83062971	83063075	83063245	83063300	2	0.0655069	0.93837	0.968638	25	83063089	83063176	246	0.883206	1.74538e-05	0.00010712	485	83063014	83063166	46	0.315965	0.201495	0.364996	285	83062892	83062985	106	0.244533	0.118973	0.247241	838	ENSG00000165105	-	RASEF	1630.98	0.429024
chr9	83979580	83980405	83980207	83980405	83979580	83979742	83980389	83980473	37	1.8361	7.19117e-06	4.71506e-05	128	83980154	83980225	16322	-0.224527	0.0149749	0.0461207	64471	83979735	83979792	20	-0.820151	0.089509	0.198659	77	83979558	83979631	24	1.02333	0.00323064	0.0122299	132	ENSG00000165119	-	HNRNPK	14044.5	-0.221588
chr9	85940853	85941603	85940853	85941171	85941493	85941603	85940802	85940878	20	0.258162	0.460128	0.640752	131	85941009	85941343	555	0.20051	0.0358575	0.0956744	6673	85941446	85941494	10	1.25331	0.0533511	0.132311	39	85941510	85941656	94	-0.543841	0.00835031	0.02793	454	ENSG00000135040	+	NAA35	2492.64	0.0187045
chr9	88388226	88388790	88388226	88388331	88388663	88388790	88388163	88388257	166	0.996966	1.12094e-07	9.52553e-07	562	88388305	88388482	705	0.227406	0.00975146	0.0319429	14466	88388614	88388695	28	-0.341536	0.472261	0.651767	83	88388705	88388856	6	1.45332	0.0161612	0.0491598	49	ENSG00000106723	+	SPIN1	4810.9	0.135442
chr9	89318413	89318837	89318413	89318510	89318718	89318837	89318355	89318447	28	-0.707538	0.0968705	0.211418	100	89318486	89318571	2263	0.676621	1.50621e-16	2.7489e-15	11195	89318667	89318725	15	0.913141	0.0902661	0.199965	73	89318833	89318886	11	0.707787	0.313478	0.498499	34	ENSG00000187742	+	SECISBP2	2920.51	0.644589
chr9	89604660	89605681	89604660	89605011	89605509	89605681	89604609	89604687	31	6.83839	1.24749e-10	1.4649e-09	107	89605006	89605063	1483	3.09317	4.59524e-123	1.37266e-120	1932	89605481	89605539	7	2.74246	7.35698e-05	0.000402752	48	89605667	89605839	26	-0.202189	0.407877	0.594321	291	ENSG00000130222	+	GADD45G	1015.4	2.62239
chr9	92141394	92141814	92141394	92141443	92141800	92141814	92141236	92141397	22	2.99276	9.38044e-11	1.11421e-09	119	92141229	92141647	463	4.3526	0	0	5722	92141755	92141801	16	4.29375	0.000491463	0.00227153	19	92141810	92141862	5	2.89962	0.00688524	0.0236827	20	ENSG00000225511	+	LINC00475	1768.28	5.05275
chr9	93133153	93134360	93134250	93134360	93133153	93133436	93134355	93134409	3	0.571016	0.525877	0.698295	19	93134192	93134282	22529	2.00861	2.25652e-152	1.04239e-149	34129	93133422	93133495	29	3.39508	3.77617e-10	4.23709e-09	99	93133102	93133160	5	2.99133	0.0195734	0.0578106	14	ENSG00000131669	-	NINJ1	6914.59	1.96118
chr9	93450583	93451684	93451553	93451684	93450583	93450959	93451645	93451756	205	0.0151325	0.908556	0.952875	2026	93451448	93451616	2551	-0.313073	0.000422756	0.00198028	16207	93450949	93451006	8	-0.208147	0.773606	0.87516	33	93450508	93450603	30	-0.823172	0.0372897	0.098757	126	ENSG00000188938	-	FAM120AOS	5747.82	-0.117215
chr9	93452071	93453741	93453547	93453741	93452071	93452321	93453689	93453805	34	2.00218	1.13376e-07	9.62768e-07	132	93453498	93453561	377	0.841367	4.23999e-07	3.34577e-06	920	93452297	93452369	54	-0.335277	0.426608	0.610795	100	93452022	93452079	11	0.990747	0.179094	0.335071	30	ENSG00000188938	-	FAM120AOS	5747.82	-0.117215
chr9	93576363	93576760	93576363	93576583	93576589	93576760	93576314	93576380	30	-0.373969	0.394624	0.581345	100	93576371	93576654	336	0.243887	0.0507957	0.127156	2180	93576438	93576602	71	0.495003	0.100147	0.216756	188	93576718	93576813	117	0.16775	0.252035	0.428227	1000	ENSG00000197724	+	PHF2	4286.15	0.0687966
chr9	93576589	93577328	93576589	93576760	93577020	93577328	93576438	93576602	71	0.495003	0.100147	0.216756	188	93576718	93576813	117	0.16775	0.252035	0.428227	1000	93576953	93577024	16	2.23501	0.000351617	0.00167103	50	93577310	93577357	4	-1.40014	0.114405	0.240108	27	ENSG00000197724	+	PHF2	4286.15	0.0687966
chr9	95317237	95317862	95317708	95317862	95317237	95317338	95317795	95317924	14	-0.657488	0.134723	0.271342	102	95317642	95317741	65	-1.63503	9.11181e-13	1.28166e-11	502	95317314	95317391	14	-0.344397	0.497019	0.673938	73	95317192	95317266	14	-2.19582	0.000148671	0.000764668	78	ENSG00000158169	-	FANCC	1074.6	-1.66012
chr9	95875460	95876030	95875978	95876030	95875460	95875524	95876002	95876089	22	-0.182921	0.475117	0.654411	281	95875926	95876014	818	2.05871	2.27262e-78	3.03985e-76	3415	95875523	95875571	10	1.32013	0.113353	0.238339	23	95875408	95875593	773	-0.200342	0.0488717	0.123234	2941	ENSG00000175611	-	LINC00476	565.285	1.04785
chr9	96417419	96418596	96418358	96418596	96417419	96417484	96418594	96418643	10	1.88562	0.0404774	0.105672	23	96418298	96418396	969	-2.41992	9.8096e-90	1.59474e-87	3080	96417468	96417556	41	0.175198	0.597782	0.75388	144	96417358	96417434	34	0.0661566	0.814488	0.899502	213	ENSG00000165244	-	ZNF367	1606.89	-2.3361
chr9	97633085	97633447	97633358	97633447	97633085	97633236	97633421	97633529	247	1.98638	1.54984e-42	8.52422e-41	1405	97633279	97633384	604	-0.449977	9.30916e-07	6.99333e-06	4678	97633198	97633284	16	2.56541	5.79858e-06	3.86219e-05	66	97633035	97633092	12	-1.04067	0.0852548	0.191337	55	ENSG00000136925	-	TSTD2	1991.85	-0.1913
chr9	97922179	97922600	97922499	97922600	97922179	97922319	97922577	97922667	37	-0.975987	9.6467e-05	0.000515907	326	97922420	97922538	659	0.897755	1.2345e-18	2.54723e-17	2916	97922276	97922329	8	1.36838	0.0279179	0.0778309	44	97922127	97922212	39	0.209375	0.459083	0.639811	221	ENSG00000136932	-	TRMO	934.849	0.822336
chr9	97983125	97983997	97983125	97983340	97983716	97983997	97983063	97983134	10	0.278412	0.559021	0.724786	69	97983188	97983404	9234	-1.31903	3.38149e-52	2.42252e-50	34942	97983668	97983743	9	-1.12679	0.106328	0.227044	39	97983990	97984049	7	0.594054	0.312939	0.497876	47	ENSG00000136938	+	ANP32B	11112.3	-1.44487
chr9	104093986	104094563	104093986	104094308	104094521	104094563	104093939	104094016	53	-0.8132	0.014503	0.0448832	176	104094277	104094382	414	-1.80811	4.30438e-49	2.85616e-47	2447	104094432	104094528	9	-0.207718	0.712516	0.836132	54	104094543	104094646	75	-3.39997	9.77037e-40	4.91051e-38	730	ENSG00000136824	+	SMC2	3107.11	-2.11164
chr9	104747623	104747964	104747623	104747725	104747884	104747964	104747571	104747626	7	-1.62161	0.0841377	0.189408	25	104747710	104747796	817	-0.834436	4.85372e-15	8.02806e-14	4075	104747833	104747888	3	-0.580073	0.597548	0.753757	15	104747941	104748018	14	-1.31632	0.00314736	0.0119559	99	ENSG00000136783	+	NIPSNAP3A	760.146	-0.945182
chr9	107282975	107284107	107282975	107283278	107284040	107284107	107282906	107282984	5	1.61242	0.00319331	0.012107	60	107283256	107283333	26882	0.00822697	0.923808	0.961458	107050	107283886	107284044	13	1.97517	6.78143e-07	5.19647e-06	120	107284076	107284172	82	2.29404	9.903e-26	2.91998e-24	444	ENSG00000119318	+	RAD23B	21836.3	-0.0815987
chr9	107284040	107284299	107284040	107284107	107284192	107284299	107283886	107284044	13	1.97517	6.78143e-07	5.19647e-06	120	107284076	107284172	82	2.29404	9.903e-26	2.91998e-24	444	107284142	107284194	10	1.8605	0.0975567	0.212503	15	107284300	107284348	10	1.34942	0.218047	0.38636	15	ENSG00000119318	+	RAD23B	21836.3	-0.0815987
chr9	107487866	107488615	107488449	107488615	107487866	107488069	107488555	107488639	35	1.33112	7.20351e-08	6.25532e-07	296	107488304	107488453	64	1.43397	2.85826e-11	3.54706e-10	406	107488059	107488118	4	1.78605	0.0672005	0.158646	18	107487821	107487867	11	-0.0406381	0.96113	0.980358	24	ENSG00000136826	-	KLF4	5100.46	1.04898
chr9	107488770	107490024	107489765	107490024	107488770	107488952	107489986	107490083	85	1.69156	1.7954e-11	2.26701e-10	303	107489717	107489776	3233	1.25826	1.19787e-28	4.02476e-27	6417	107488924	107489005	25	1.46713	0.00103123	0.00442788	83	107488721	107488778	8	1.04027	0.0350819	0.0939547	66	ENSG00000136826	-	KLF4	5100.46	1.04898
chr9	109497935	109498317	109498306	109498317	109497935	109498059	109498317	109498505	34	1.32084	7.7218e-06	5.03603e-05	214	109498231	109498334	692	0.213571	0.0347634	0.0932948	2967	109498051	109498109	7	1.65377	0.0220837	0.0639622	33	109497855	109497966	54	-0.0398435	0.854659	0.92367	381	ENSG00000070159	-	PTPN3	3195.83	0.219409
chr9	111896666	111897166	111896666	111896813	111897012	111897166	111896606	111896681	300	2.1065	8.88515e-50	5.98975e-48	1192	111896793	111896864	4875	0.806094	2.01951e-18	4.12371e-17	8342	111896964	111897024	16	0.722455	0.143338	0.284307	67	111897044	111897308	159	-0.380891	0.00316537	0.0120178	1864	ENSG00000148154	+	UGCG	4148.36	0.746063
chr9	112332988	112333989	112333618	112333989	112332988	112333110	112333989	112334042	5	-2.24989	0.0404185	0.105555	22	112333564	112333651	6570	0.195686	0.0133649	0.0418962	32438	112333027	112333185	96	1.72699	1.7549e-21	4.20381e-20	648	112332919	112333017	854	5.47638	1.52604e-184	1.06616e-181	2773	ENSG00000119314	-	PTBP3	11141.6	0.404618
chr9	114611227	114611455	114611227	114611290	114611358	114611455	114611165	114611230	8	-0.908532	0.165187	0.316212	42	114611198	114611360	138	-0.818813	8.15405e-09	7.9432e-08	1132	114611312	114611365	6	-0.43541	0.624408	0.774234	23	114611422	114611516	127	-0.733248	5.66266e-06	3.77761e-05	828	ENSG00000157693	+	TMEM268	841.799	-0.44489
chr9	120876387	120877515	120877337	120877515	120876387	120876557	120877508	120877559	10	-4.47789	0.000108308	0.000573931	37	120877276	120877351	396	-3.61039	1.22786e-93	2.1446e-91	2121	120876555	120876737	59	-3.18583	4.60496e-17	8.71079e-16	275	120876237	120876391	31	-4.54316	8.29429e-09	8.07423e-08	129	ENSG00000119403	-	PHF19	2618.64	-4.46756
chr9	121268041	121269205	121268041	121268161	121269062	121269205	121267993	121268070	33	1.49909	3.37225e-05	0.000196199	153	121268136	121268240	1133	2.64828	1.241e-175	8.26055e-173	6775	121269011	121269071	529	5.72348	1.52229e-116	4.05957e-114	1670	121269204	121269341	111	4.69106	6.98321e-35	2.99054e-33	368	ENSG00000148180	+	GSN	37074.2	2.93707
chr9	122931266	122931686	122931523	122931686	122931266	122931318	122931649	122931758	47	-0.175268	0.453955	0.634968	340	122931439	122931623	164	0.155056	0.17746	0.332914	1958	122931318	122931374	16	0.826907	0.153156	0.298832	51	122931216	122931272	18	-0.807588	0.206551	0.371827	46	ENSG00000171448	-	ZBTB26	1068.5	-0.265069
chr9	122940782	122941401	122940782	122941020	122941247	122941401	122940732	122940787	6	1.40607	0.0627864	0.150398	33	122940995	122941089	2029	0.389744	9.21249e-06	5.92278e-05	9648	122941198	122941265	243	0.983865	1.48844e-05	9.25334e-05	433	122941348	122941404	2	0.96406	0.326609	0.512495	17	ENSG00000011454	+	RABGAP1	7785.27	0.438946
chr9	124861426	124862129	124861956	124862129	124861426	124861546	124862096	124862197	135	-0.900211	3.85357e-06	2.63885e-05	586	124861905	124861974	354841	0.270916	0.00043644	0.00203952	623071	124861506	124861565	7	-0.88632	0.174914	0.329652	44	124861377	124861432	39	-1.03738	0.0177732	0.0533246	97	ENSG00000136942	-	RPL35	7161.93	0.00269098
chr9	125746533	125747420	125746533	125746707	125747414	125747420	125746486	125746537	3	-1.01941	0.231893	0.403142	26	125746675	125746781	393	-0.131359	0.270409	0.449435	2915	125747385	125747430	5	0.983231	0.332332	0.518206	15	125747355	125747444	155	-0.388037	0.0033204	0.0125192	1259	ENSG00000167081	+	PBX3	1685.82	-0.779457
chr9	125747414	125748307	125747414	125747420	125748306	125748307	125747385	125747430	5	0.983231	0.332332	0.518206	15	125747355	125747444	155	-0.388037	0.0033204	0.0125192	1259	125748257	125748310	5	1.39489	0.0924722	0.203876	24	125748306	125748358	21	0.816116	0.178883	0.334834	47	ENSG00000167081	+	PBX3	1685.82	-0.779457
chr9	126804870	126806022	126804870	126805039	126805820	126806022	126804805	126804883	7	-0.173714	0.781124	0.879877	43	126805002	126805093	661	0.829086	2.89862e-16	5.19258e-15	3863	126805757	126805828	9	4.91513	5.98025e-08	5.25024e-07	71	126806021	126806072	6	4.86944	4.00276e-05	0.000229907	27	ENSG00000169155	+	ZBTB43	1812.7	0.982793
chr9	127785951	127786427	127785951	127786033	127786364	127786427	127785904	127785968	10	-1.91777	0.00625699	0.0217725	53	127786016	127786122	2274	0.30092	6.72906e-05	0.000371335	15506	127786316	127786398	37	1.57319	2.97224e-05	0.000174657	131	127786428	127786517	6	-0.753025	0.123486	0.254275	84	ENSG00000136807	+	CDK9	3830.85	0.122928
chr9	127980532	127981241	127980988	127981241	127980532	127980677	127981216	127981368	76	1.72631	2.44877e-13	3.59391e-12	397	127980938	127981006	38975	0.380947	1.25738e-05	7.91582e-05	48403	127980668	127980725	4	1.12093	0.0684899	0.16104	42	127980480	127980552	5919	0.359358	2.5767e-06	1.81403e-05	11032	ENSG00000167106	-	FAM102A	27155	0.432426
chr9	128655823	128656794	128656657	128656794	128655823	128655957	128656787	128656847	10	0.739794	0.243823	0.41779	44	128656620	128656719	10216	-0.941051	2.35185e-37	1.0942e-35	37850	128655955	128656007	11	-1.52831	0.0765995	0.176016	29	128655748	128655827	20	-2.16016	8.84266e-06	5.70454e-05	118	ENSG00000119333	-	DYNC2I2	11547.5	-1.01532
chr9	128882062	128882633	128882062	128882141	128882524	128882633	128881865	128882087	67	0.23615	0.2973	0.479785	389	128882113	128882213	792	0.834418	6.36204e-25	1.81085e-23	8465	128882477	128882550	11	-0.175137	0.750572	0.860484	55	128882632	128882683	12	-2.77867	0.0251151	0.0712724	20	ENSG00000136802	+	LRRC8A	5137.7	0.89364
chr9	129080759	129081421	129080759	129081110	129081375	129081421	129080696	129080792	127	1.19871	4.09392e-15	6.8073e-14	1169	129081100	129081177	1627	0.0767139	0.37245	0.558605	9864	129081310	129081381	31	1.6554	0.000511618	0.00235603	77	129081401	129081475	25	0.647886	0.1275	0.260184	87	ENSG00000167130	+	DOLPP1	3094.15	0.111769
chr9	129139956	129140881	129139956	129140103	129140755	129140881	129139853	129139959	6	0.412515	0.494623	0.671951	46	129139997	129140159	354	-0.559463	7.46919e-08	6.47141e-07	2863	129140701	129140766	14	-0.929556	0.0337725	0.0911118	110	129140867	129140930	32	0.26576	0.514178	0.689008	98	ENSG00000235007	+	ENSG00000235007	2.45269	4.12209
chr9	129483200	129483872	129483200	129483304	129483790	129483872	129483154	129483238	20	-0.137905	0.766085	0.870384	79	129483292	129483357	54	1.07799	0.000621621	0.00280862	173	129483510	129483803	43	0.553423	0.0281411	0.0783729	285	129483833	129483921	27	0.978207	0.00348139	0.0130494	158	ENSG00000204054	+	LINC00963	5184.3	1.20981
chr9	129488641	129490821	129488641	129488904	129490691	129490821	129488413	129488735	51	0.832265	0.00019013	0.000954956	337	129488659	129488984	463	0.748238	1.87814e-17	3.64571e-16	4774	129490593	129490726	19	0.0512929	0.873421	0.933953	198	129490793	129490894	233	0.0071211	0.963616	0.981673	773	ENSG00000204054	+	LINC00963	5184.3	1.20981
chr9	129495957	129497437	129495957	129496266	129497324	129497437	129495841	129496023	79	1.06463	2.10463e-07	1.73038e-06	451	129496199	129496287	106	0.184081	0.404238	0.591066	431	129497254	129497329	11	-0.444556	0.424449	0.608868	68	129497402	129497507	8	-0.819238	0.166722	0.318436	59	ENSG00000204054	+	LINC00963	5184.3	1.20981
chr9	132669666	132670060	132669975	132670060	132669666	132669701	132670017	132670114	99	0.261643	0.118344	0.246333	829	132669893	132670004	456	-0.361106	0.000710049	0.00316403	2651	132669678	132669821	25	-0.245611	0.439964	0.622516	172	132669601	132669673	15	-2.0811	0.00126758	0.00532957	60	ENSG00000125485	-	DDX31	1369.4	-0.275543
chr9	133347809	133348217	133348095	133348217	133347809	133347942	133348190	133348349	857	-0.321379	0.000185193	0.000932982	5613	133348011	133348119	1269	-0.728278	1.78657e-16	3.24236e-15	12449	133347913	133347993	49	-2.95768	7.45179e-09	7.30371e-08	137	133347767	133347867	8	-1.71041	0.00564298	0.0199018	59	ENSG00000148297	-	MED22	3645.19	-0.822175
chr9	133990915	133992435	133992323	133992435	133990915	133991073	133992421	133992487	4	0.240101	0.626121	0.775392	69	133992272	133992338	1755	0.730495	1.40257e-17	2.73765e-16	4095	133991053	133991141	27	2.03341	4.54738e-08	4.04996e-07	138	133990867	133990917	12	4.62655	0.000122848	0.000643598	23	ENSG00000160293	-	VAV2	8229.83	0.587277
chr9	135500517	135501309	135500517	135500682	135501226	135501309	135500469	135500534	20	-1.45033	0.00733879	0.0250148	74	135500664	135500742	4342	-0.76739	1.81098e-24	5.03926e-23	24209	135501153	135501256	138	0.251326	0.173	0.327014	540	135501304	135501361	4	-0.363332	0.604337	0.758516	35	ENSG00000122140	+	MRPS2	3420.95	-0.777536
chr9	136108410	136109485	136109388	136109485	136108410	136108550	136109482	136109589	22	4.1255	1.15412e-15	1.98868e-14	152	136109338	136109416	1653	5.61111	2.84078e-254	5.71782e-251	4214	136108550	136108706	20	5.75725	6.99152e-14	1.06839e-12	167	136108338	136108499	118	7.0677	1.43773e-21	3.46367e-20	407	ENSG00000260193	-	LINC02846	1218.42	4.53687
chr9	136943955	136944348	136944069	136944348	136943955	136944031	136944327	136944403	11	1.56053	0.000560456	0.00255854	84	136944024	136944070	25	-0.101918	0.865014	0.928758	51	136943971	136944082	7	2.00505	0.000683086	0.00305709	53	136943891	136943961	10	0.503775	0.445204	0.627127	37	ENSG00000159069	-	FBXW5	10486.4	0.492817
chr9	136992178	136992786	136992178	136992421	136992670	136992786	136992113	136992218	10	-1.76582	0.00133123	0.00556426	76	136992401	136992495	3109	-1.16638	6.14458e-60	5.33853e-58	18816	136992624	136992675	31	-1.64269	0.000748938	0.0033179	92	136992764	136992839	263	-1.30215	1.03553e-14	1.67701e-13	957	ENSG00000148362	+	PAXX	3040.98	-1.22972
chr9	137045350	137046280	137046105	137046280	137045350	137045568	137046250	137046364	49	-0.698588	0.0365304	0.0971294	170	137046037	137046222	2929	-0.191404	0.0124466	0.0393828	18216	137045562	137045615	33	0.417462	0.414554	0.600575	60	137045300	137045353	105	-0.610723	0.0688078	0.161594	164	ENSG00000107281	-	NPDC1	9467.75	-0.417962
chr9	137188559	137189107	137188559	137188675	137188981	137189107	137188500	137188592	856	0.0294731	0.780399	0.879471	4386	137188667	137188859	1186	-0.554174	1.43205e-09	1.51971e-08	15408	137188899	137189003	63	0.578464	0.00402754	0.0148373	422	137189079	137189179	206	-0.761529	6.72741e-07	5.15835e-06	1159	ENSG00000176101	+	SSNA1	4239.03	-0.649332
chr9	137551775	137552475	137551775	137551878	137552461	137552475	137551712	137551794	23	1.50091	3.42803e-05	0.000199238	128	137551870	137551969	14403	-0.0148805	0.853664	0.922996	137254	137552410	137552464	4	0.581149	0.405388	0.592024	32	137552470	137552523	31	-2.63252	0.035038	0.0938597	48	ENSG00000182154	+	MRPL41	7652.84	-0.116119
chr9	137612196	137614135	137612196	137612428	137613761	137614135	137612150	137612280	13	0.289871	0.50514	0.681235	86	137612410	137612591	420	1.6106	1.60662e-70	1.82061e-68	3993	137613694	137613765	16	0.700383	0.187393	0.345988	60	137614123	137614186	20	1.60808	0.00630168	0.0219076	52	ENSG00000197070	+	ARRDC1	10295.5	0.860907
chrM	1657	2201	1657	1671	2157	2201	1607	1664	7	2.17297	0.0374272	0.0990826	18	1666	1801	645244	0.906791	0.00084546	0.00370071	799389	2026	2258	47	1.38121	0.105314	0.225421	253	2105	2274	420669	0.779398	3.77605e-14	5.87867e-13	2918237	ENSG00000210082	+	MT-RNR2	773635	1.35909
chrX	1391650	1392368	1392112	1392368	1391650	1391788	1392346	1392450	43	0.693902	0.00130404	0.00546709	392	1392062	1392132	32033	0.281708	0.000288713	0.00139818	57676	1391767	1391865	19	0.515572	0.107471	0.228903	169	1391601	1391672	7	-0.890755	0.214688	0.382204	35	ENSG00000169100	-	SLC25A6	21227.2	0.135232
chrX	15674805	15675173	15674805	15674965	15675091	15675173	15674755	15674809	11	-0.34932	0.650274	0.792978	32	15674849	15675042	33	-0.630149	0.000564216	0.00257444	607	15675046	15675106	15	0.667643	0.154345	0.300489	81	15675150	15675239	22	-0.77308	0.013507	0.0422742	195	ENSG00000186312	+	CA5BP1	470.67	-0.734657
chrX	24149627	24150425	24149627	24149728	24150175	24150425	24149555	24149628	8	-1.34238	0.0237064	0.0679521	57	24149712	24149802	529	0.0264361	0.821406	0.903604	1899	24150127	24150179	11	0.427126	0.451938	0.633152	55	24150418	24150474	7	-0.921286	0.183106	0.340363	38	ENSG00000005889	+	ZFX	1560.87	0.112705
chrX	41085229	41085818	41085229	41085350	41085627	41085818	41085195	41085242	4	0.006068	0.993356	0.99662	30	41085342	41085513	381	0.225074	0.0503274	0.126212	1695	41085604	41085723	10	1.70845	0.00486385	0.0174676	49	41085812	41085899	83	0.658957	9.79708e-05	0.000523155	665	ENSG00000124486	+	USP9X	6228.42	0.449279
chrX	41334077	41334609	41334077	41334161	41334517	41334609	41334013	41334083	4	-0.353939	0.658959	0.79937	27	41334157	41334210	19283	0.358316	8.70649e-07	6.5686e-06	22304	41334472	41334521	6	-1.73399	0.087149	0.194672	22	41334589	41334686	12	0.17764	0.642156	0.787288	119	ENSG00000215301	+	DDX3X	22871.2	0.303947
chrX	47482926	47483276	47483180	47483276	47482926	47482990	47483257	47483325	13	-0.169642	0.693182	0.823132	90	47483122	47483217	104	-0.534891	0.0042527	0.0155489	573	47482965	47483065	19	0.279242	0.34893	0.534708	190	47482878	47482930	13	-0.0249653	0.96928	0.984359	40	ENSG00000147124	-	ZNF41	663.385	-0.384944
chrX	48574311	48574945	48574311	48574510	48574867	48574945	48574182	48574314	6	-0.0297034	0.952378	0.975679	70	48574477	48574614	4176	-0.320906	4.88795e-05	0.000276523	13589	48574816	48574902	66	0.47026	0.0290327	0.0803927	389	48574943	48575023	39	-0.475111	0.121411	0.251139	182	ENSG00000102317	+	RBM3	8998.01	-0.242258
chrX	48957595	48958208	48957879	48958208	48957595	48957673	48958180	48958256	10	3.8757	7.25595e-05	0.000397582	36	48957723	48957913	339	1.712	1.23641e-31	4.71454e-30	1961	48957668	48957728	9	-0.316835	0.604887	0.75899	45	48957518	48957622	63	-1.67926	2.18419e-13	3.21342e-12	455	ENSG00000068308	-	OTUD5	2876.9	0.945088
chrX	53422175	53422905	53422653	53422905	53422175	53422284	53422856	53423025	77	2.55327	1.13253e-41	6.02514e-40	720	53422601	53422686	2681	-0.670266	3.56502e-15	5.9501e-14	6508	53422281	53422346	17	-0.452363	0.355887	0.541609	71	53422126	53422192	94	-0.0304798	0.914572	0.956352	216	ENSG00000072501	-	SMC1A	7743.44	-0.595527
chrX	103918745	103919177	103919081	103919177	103918745	103918877	103919155	103919240	13	-2.00671	0.000234584	0.00115571	83	103919013	103919107	29	-0.718621	0.0194825	0.0575824	191	103918851	103918943	15	-1.75243	3.54503e-05	0.0002056	127	103918697	103918751	13	-2.51632	0.0205419	0.0601828	25	ENSG00000231728	-	TMSB15B-AS1	18.9091	-1.53918
chrX	120560743	120561142	120560961	120561142	120560743	120560860	120561107	120561188	6	1.72987	0.00133123	0.00556426	63	120560844	120561106	201	0.404524	0.00168246	0.00686166	1312	120560828	120560893	6	1.10754	0.0444206	0.114041	55	120560667	120560763	5	-1.10997	0.0108916	0.0350943	100	ENSG00000158290	-	CUL4B	2694.99	0.0716865
chrX	120603798	120604707	120603798	120604100	120604624	120604707	120603752	120603800	7	-0.898827	0.415357	0.60133	18	120603896	120604184	1736	-0.370546	1.25482e-06	9.25873e-06	14541	120604578	120604634	13	-0.583254	0.31124	0.495863	53	120604674	120604756	7	-1.91821	0.000134709	0.000699108	103	ENSG00000232119	+	MCTS1	1660.29	-0.178017
chrX	123960285	123961311	123960285	123960547	123961262	123961311	123960237	123960299	82	0.956538	0.00199523	0.00798469	173	123960477	123960600	493	0.323433	0.022498	0.0649665	1020	123961215	123961272	27	-0.0181137	0.962272	0.980984	115	123961310	123961367	111	-0.383922	0.0721062	0.167774	440	ENSG00000101972	+	STAG2	5152.9	-0.0701474
chrX	123961262	123961585	123961262	123961311	123961541	123961585	123961215	123961272	27	-0.0181137	0.962272	0.980984	115	123961310	123961367	111	-0.383922	0.0721062	0.167774	440	123961337	123961571	34	0.38788	0.152293	0.297575	246	123961582	123961636	19	1.58378	0.00406044	0.014941	59	ENSG00000101972	+	STAG2	5152.9	-0.0701474
chrX	135051149	135052278	135052134	135052278	135051149	135051412	135052276	135052328	5	-0.904691	0.388255	0.574887	17	135052074	135052231	4018	0.308732	5.85495e-05	0.000326487	16550	135051410	135051465	3	-0.545578	0.567981	0.731498	20	135051102	135051228	17	0.641068	0.1196	0.248256	95	ENSG00000203950	-	RTL8A	2953.56	0.358906
chrX	136497176	136497560	136497176	136497235	136497470	136497560	136497129	136497182	9	-0.013915	0.987464	0.99341	21	136497219	136497380	798	-0.510317	3.03005e-08	2.75962e-07	4572	136497419	136497476	8	-0.169121	0.827078	0.906999	29	136497521	136497613	275	-1.56139	1.06933e-34	4.55861e-33	2324	ENSG00000102241	+	HTATSF1	5005.95	-0.855333
chrX	153794090	153794489	153794335	153794489	153794090	153794158	153794466	153794558	262	0.783387	6.74661e-11	8.11283e-10	1623	153794296	153794389	5785	0.373093	1.1218e-06	8.32884e-06	27964	153794155	153794282	144	0.854328	2.10344e-07	1.72973e-06	693	153794038	153794095	8	-0.769689	0.181023	0.337582	55	ENSG00000067829	-	IDH3G	3655.88	0.343849
chrX	153971197	153971943	153971817	153971943	153971197	153971294	153971931	153971991	20	0.877548	0.0825553	0.186631	72	153971766	153971846	842	-0.518171	1.18765e-05	7.50585e-05	2046	153971268	153971426	38	0.311727	0.0813531	0.184521	571	153971145	153971218	368	-1.53576	1.38768e-42	7.65227e-41	3228	ENSG00000172534	-	HCFC1	6133.58	-0.439594
chrX	154019048	154019971	154019896	154019971	154019048	154019195	154019953	154020112	80	0.239042	0.273817	0.453222	406	154019819	154019915	9043	-0.446513	8.96472e-10	9.69726e-09	28214	154019196	154019246	11	-1.35635	0.163222	0.313317	22	154019002	154019049	12	-1.01379	0.337015	0.522885	19	ENSG00000184216	-	IRAK1	17185.9	-0.523774
chrX	154369443	154371516	154371357	154371516	154369443	154369820	154371506	154371573	77	1.97164	1.04391e-13	1.57585e-12	282	154371305	154371372	54599	1.56856	6.15076e-80	8.4e-78	84186	154369820	154369871	10	2.76458	0.00360575	0.0134604	25	154369390	154369462	93	1.20285	6.16663e-09	6.1088e-08	409	ENSG00000196924	-	FLNA	172253	0.783752
chrX	154398193	154399020	154398193	154398376	154398827	154399020	154398061	154398229	19	0.836387	0.00787357	0.026555	180	154398258	154398441	949	-0.420743	4.24999e-05	0.000243067	3668	154398766	154398861	98	0.165698	0.410535	0.596777	514	154398919	154399072	96	-1.75197	2.90624e-16	5.20512e-15	579	ENSG00000147403	+	RPL10	2726.45	-0.0624049
chrX	154428463	154429049	154428463	154428676	154428981	154429049	154428397	154428490	389	-0.36083	0.000998094	0.00429782	3240	154428634	154428739	14936	0.135118	0.0833428	0.188024	36613	154428934	154428985	25	0.709056	0.291358	0.47294	36	154429048	154429099	7	-0.184443	0.828614	0.907919	23	ENSG00000071553	+	ATP6AP1	11337.2	0.157881

## Sheet: SuperPromoters_core_RPE1
chr	super-Promoter_start	super-Promoter_end	sub-promoter#1_start	sub-promoter#1_end	sub-promoter#2_start	sub-promoter#2_end	peak#1_start	peak#1_end	CTSS#1	peak#1_l2fc	peak#1_pval	peak#1_adj_pval	peak#1_readcount	peak#2_start	peak#2_end	CTSS#2	peak#2_l2fc	peak#2_pval	peak#2_adj_pval	peak#2_readcount	peak#3_start	peak#3_end	CTSS#3	peak#3_2fc	peak#3_pval	peak#3_adj_pval	peak#3_readcount	peak#4_start	peak#4_end	CTSS#4	peak#4_l2fc	peak#4_pval	peak#4_adj_pval	peak#4_readcount	host_gene	orientation	hgnc	host_gene_baseMean	host_gene_lfc
chr1	999273	1000238	1000094	1000238	999273	999375	1000216	1000357	28	-0.982551	0.0254478	0.122597	130	999965	1000141	1273	-1.3777	1.30552e-37	1.78141e-35	7169	999306	999419	3	-1.11931	0.297655	NA	19	999186	999281	7	-1.32508	0.10589	0.335448	39	ENSG00000188290	-	HES4	1.95802	-0.628285
chr1	1471666	1472137	1471666	1471777	1472131	1472137	1471512	1471707	12	-0.721333	0.0820226	0.283211	130	1471751	1471895	408	-1.20446	1.60148e-20	1.14126e-18	3493	1472102	1472137	5	-0.118527	0.906758	0.971828	22	1472120	1472222	3	-0.0984828	0.916474	0.974321	26	ENSG00000160072	+	ATAD3B	874.091	-0.575593
chr1	1615796	1616295	1615796	1615864	1616170	1616295	1615647	1615817	56	0.0209777	0.949686	0.984917	219	1615848	1615998	339	0.864489	1.31101e-11	4.6301e-10	2515	1616086	1616182	16	1.03348	0.136979	0.395366	41	1616228	1616343	10	0.581726	0.179198	0.464148	105	ENSG00000197530	+	MIB2	560.996	1.30925
chr1	6613386	6614840	6613386	6613754	6614705	6614840	6613291	6613396	13	-0.0448419	0.931301	0.979282	74	6613727	6613878	196	-0.347334	0.0528367	0.209126	1280	6614500	6614770	8	0.811724	0.105432	0.334566	88	6614787	6614883	9	2.3565	0.000300543	0.00304075	59	ENSG00000116273	+	PHF13	1277.8	-0.543851
chr1	9182102	9182461	9182102	9182188	9182337	9182461	9182011	9182153	53	2.95533	1.063e-09	2.98464e-08	129	9182158	9182315	142	3.47478	5.63087e-79	1.74865e-76	1330	9182216	9182406	43	1.95687	1.99396e-15	1.01597e-13	456	9182379	9182538	30	1.64456	3.78882e-06	5.99545e-05	183	ENSG00000234546	+	LNCTAM34A	98.4275	1.68733
chr1	9942765	9943433	9943338	9943433	9942765	9942923	9943410	9943573	104	0.182115	0.370122	0.682625	652	9943240	9943369	251	-0.335304	0.0342412	0.15283	1465	9942922	9943015	11	0.538535	0.537803	0.80552	25	9942636	9942798	44	-0.0346758	0.911913	0.973284	221	ENSG00000162441	-	LZIC	1513.32	-0.325045
chr1	12617937	12618477	12618222	12618477	12617937	12618018	12618423	12618563	17	0.358375	0.324325	0.640177	164	12618090	12618418	187	-0.0430161	0.776632	0.924711	1354	12618016	12618112	5	-0.522979	0.605724	NA	20	12617816	12618011	92	-0.477773	0.0188906	0.0973264	616	ENSG00000162496	-	DHRS3	137.43	1.59902
chr1	16155016	16156174	16156068	16156174	16155016	16155214	16156171	16156262	12	0.391717	0.510791	0.786682	59	16155949	16156078	8637	0.418761	1.99195e-05	0.000271911	19712	16155182	16155346	89	-0.147831	0.527007	0.798093	441	16154921	16155132	12	0.139658	0.746795	0.912321	110	ENSG00000142627	-	EPHA2	4653.95	0.936321
chr1	25247086	25247632	25247453	25247632	25247086	25247129	25247615	25247733	10	-0.695988	0.204903	0.501813	73	25247365	25247462	1233	0.464712	0.0086697	0.0525824	1773	25247125	25247224	5	0.855559	0.358595	0.672419	26	25246945	25247117	14	1.19382	0.00373045	0.0263549	127	ENSG00000117616	-	RSRP1	407.873	0.442998
chr1	25819880	25820864	25819880	25819977	25820804	25820864	25819767	25819928	18	1.17036	0.00272109	0.0203283	145	25819912	25820065	109	0.756061	2.89967e-05	0.000380255	1000	25820707	25820840	14	1.0131	0.0865203	0.29366	61	25820858	25820980	10	1.33033	0.0323358	0.146571	56	ENSG00000117640	+	MTFR1L	1298.42	0.309502
chr1	26279935	26281196	26279935	26280098	26280905	26281196	26279847	26279970	7	0.187183	0.783218	0.927505	43	26280051	26280197	48543	0.768021	3.50343e-12	1.31533e-10	151261	26280812	26280916	7	-0.0785135	0.922441	0.976518	34	26281051	26281294	2749	0.52053	3.16471e-06	5.07926e-05	8989	ENSG00000142669	+	SH3BGRL3	5108.12	0.810205
chr1	26900098	26900523	26900456	26900523	26900098	26900197	26900517	26900637	16	-0.107464	0.814255	0.938918	110	26900358	26900471	84	0.258209	0.222109	0.524941	653	26900166	26900297	19	0.834649	0.0485263	0.196765	113	26899996	26900130	24	-0.00600084	0.988132	0.996494	142	ENSG00000198746	-	GPATCH3	661.112	0.153015
chr1	34984858	34985388	34985324	34985388	34984858	34984964	34985362	34985479	11	0.107412	0.870499	0.959561	52	34985208	34985351	2484	0.445725	5.80232e-05	0.000711678	9944	34984917	34985108	35	-0.303799	0.266562	0.578621	297	34984763	34984866	9	0.0443042	0.953779	0.986405	40	ENSG00000284773	-	ENSG00000284773	2.49008	1.82171
chr1	35769461	35770129	35769966	35770129	35769461	35769571	35770103	35770218	5	-5.57678	4.08109e-05	0.000517933	34	35769866	35770008	561	-4.73873	1.30508e-138	7.70716e-136	3598	35769567	35769667	7	-5.15627	0.000265656	0.00273699	26	35769376	35769467	6	-0.743675	0.420414	0.72335	31	ENSG00000092853	-	CLSPN	1421.13	-3.41794
chr1	36155855	36157117	36155855	36155910	36157033	36157117	36155713	36155866	13	-0.084282	0.852274	0.952583	106	36155881	36156058	47	-0.714521	0.025481	0.122724	321	36156948	36157036	5	-0.112255	0.904992	0.971012	22	36157084	36157206	19	-0.101789	0.862939	0.957107	66	ENSG00000116871	+	MAP7D1	7419.38	-0.368707
chr1	37474406	37476810	37474406	37474579	37476739	37476810	37474274	37474446	252	0.676561	5.13299e-06	7.9139e-05	1480	37474545	37474638	327	0.14391	0.535617	0.803829	725	37476649	37476754	11	0.0966632	0.873377	0.960064	58	37476803	37476896	6	-0.1023	0.9301	NA	15	ENSG00000163874	+	ZC3H12A	294.773	0.909031
chr1	43453297	43454055	43453908	43454055	43453297	43453475	43453876	43454142	13	-0.452832	0.317116	0.63282	104	43453651	43453973	2223	0.420368	0.000256628	0.0026588	16783	43453474	43453499	4	0.210372	0.863155	NA	14	43453237	43453341	6	-0.19409	0.810284	0.93745	33	ENSG00000178922	-	HYI	3.62906	-0.53854
chr1	45339969	45340469	45339969	45340222	45340413	45340469	45339874	45340125	46	-1.23525	5.47438e-05	0.000675017	303	45340010	45340328	129	-1.65812	1.6068e-20	1.14392e-18	1140	45340298	45340447	21	0.0701668	0.841492	0.948913	181	45340447	45340554	10	-2.15131	0.00507184	0.0339854	52	ENSG00000132773	+	TOE1	795.22	-1.32251
chr1	45583932	45584782	45583932	45584044	45584668	45584782	45583844	45583942	10	1.21465	0.115692	0.355228	33	45584035	45584138	7304	-2.06287	1.51627e-88	5.40805e-86	13278	45584536	45584678	13	-4.42111	2.67513e-06	4.35265e-05	85	45584772	45584864	7	-4.45985	0.00436298	NA	16	ENSG00000132780	+	NASP	5410.29	-1.39952
chr1	47333754	47334304	47333754	47333913	47334222	47334304	47333693	47333801	4	-1.25021	0.125919	0.37505	36	47333770	47334037	3175	0.244228	0.0250691	0.12117	39298	47334127	47334225	6	-1.4558	0.160163	0.434514	22	47334291	47334399	17	0.443352	0.531967	0.801761	39	ENSG00000162368	+	CMPK1	3640.84	-0.076452
chr1	66924855	66925332	66924855	66924989	66925205	66925332	66924723	66924868	145	0.530454	0.00171152	0.0137576	967	66924937	66925103	817	0.442537	0.000952195	0.00832154	3622	66925077	66925239	18	-0.0845339	0.876155	0.961118	72	66925284	66925428	58	0.475502	0.148078	0.413843	212	ENSG00000198160	+	MIER1	1541.75	0.169132
chr1	67684910	67686936	67684910	67685200	67686721	67686936	67684826	67684966	15	-0.11264	0.808843	0.93703	100	67685171	67685336	20372	1.25461	1.53433e-28	1.58828e-26	39006	67686511	67686774	7	1.85576	0.000363174	0.00357942	83	67686877	67687030	121	2.17953	9.45915e-14	4.17844e-12	440	ENSG00000116717	+	GADD45A	2827.4	2.18148
chr1	67833121	67833503	67833437	67833503	67833121	67833221	67833498	67833598	6	-0.62776	0.480827	0.766594	28	67833341	67833477	8767	-0.257947	0.00990443	0.0585962	70544	67833177	67833309	5	-0.0721368	0.908737	0.972344	53	67832995	67833124	17	0.118633	0.802912	0.934616	93	ENSG00000172380	-	GNG12	5499.88	0.0298382
chr1	85201015	85201787	85201730	85201787	85201015	85201173	85201765	85201875	7	-1.20972	0.226678	0.530542	25	85201598	85201753	151	0.212488	0.227682	0.531658	924	85201107	85201235	10	-0.253393	0.549901	0.812509	118	85200715	85201027	47	-0.517284	0.0119741	0.0679772	648	ENSG00000097096	-	SYDE2	403.393	0.00444273
chr1	85577100	85577405	85577285	85577405	85577100	85577165	85577386	85577479	9	-0.0428107	0.958825	0.98771	30	85577174	85577322	73	0.54834	0.12006	0.363674	165	85577125	85577258	14	0.163011	0.696288	0.890485	122	85576842	85577105	14	0.168281	0.648332	0.867465	175	ENSG00000282057	-	ENSG00000282057	71.6098	1.70855
chr1	85708013	85708549	85708414	85708549	85708013	85708083	85708505	85708642	13	-0.578354	0.331999	0.646795	70	85708289	85708447	2137	0.0845708	0.49133	0.773678	7390	85708006	85708192	25	-0.327465	0.361468	0.674961	200	85707871	85708229	166	-0.0968722	0.520689	0.793646	1888	ENSG00000117174	-	ZNHIT6	1043.3	0.117149
chr1	93846629	93847276	93847218	93847276	93846629	93846731	93847265	93847371	4	-0.217999	0.792538	0.931027	30	93847091	93847257	250	-0.43569	0.0245499	0.119236	729	93846662	93846765	5	-1.111	0.151572	0.420128	39	93846531	93846644	4	-0.380475	0.642219	0.864173	30	ENSG00000137936	-	BCAR3	925.189	0.26142
chr1	107056614	107057613	107056614	107056699	107057477	107057613	107056521	107056621	2	-0.64593	0.489475	0.77275	25	107056659	107056799	465	-0.433098	0.000911133	0.00800346	3335	107057388	107057530	16	-1.49141	0.00136531	0.0113626	116	107057612	107057701	4	-1.14779	0.29767	NA	20	ENSG00000198890	+	PRMT6	1522.65	-0.104584
chr1	147669623	147670694	147670522	147670694	147669623	147669657	147670661	147670791	23	-0.725763	0.161768	0.436972	91	147670356	147670535	36	0.170257	0.47803	0.764683	394	147669654	147669781	12	0.98055	0.132569	0.387239	46	147669536	147669633	16	-0.0206051	0.973574	0.991926	57	ENSG00000162836	-	ACP6	354.002	0.576802
chr1	150234674	150236365	150236111	150236365	150234674	150234741	150236361	150236491	46	-5.3261	1.10974e-06	1.94015e-05	107	150235887	150236165	15029	-1.54873	9.39193e-64	2.34139e-61	34248	150234732	150234837	31	-0.836933	0.159961	0.434284	67	150234566	150234795	75	0.475726	0.120077	0.363708	288	ENSG00000143401	-	ANP32E	3884.04	-1.61733
chr1	151165859	151166685	151165859	151166143	151166555	151166685	151165760	151165934	226	0.061226	0.674795	0.88071	1676	151166080	151166242	2018	0.251592	0.0214803	0.107472	7817	151166468	151166558	16	1.84803	0.0211418	0.106161	34	151166633	151166784	60	0.992588	2.34191e-05	0.000313736	448	ENSG00000163156	+	SCNM1	597.759	-0.0796765
chr1	155323136	155323924	155323136	155323490	155323800	155323924	155323022	155323157	22	0.162958	0.728589	0.904037	90	155323320	155323596	26	0.479739	0.100966	0.32508	275	155323711	155323850	17	0.415351	0.383299	0.69391	115	155323917	155324011	22	-0.281926	0.693067	0.888921	39	ENSG00000160753	+	RUSC1	1383.98	-0.417137
chr1	156212881	156213335	156212881	156213006	156213243	156213335	156212792	156212884	3	-0.833477	0.414603	NA	20	156212991	156213102	2174	-0.539128	1.05905e-06	1.85998e-05	10174	156213119	156213255	6	0.0104618	0.986327	0.995838	54	156213289	156213426	5	-0.602473	0.43609	0.734845	36	ENSG00000260238	+	PMF1-BGLAP	0	NA
chr1	156728405	156728933	156728405	156728509	156728715	156728933	156728308	156728463	132	-0.536672	0.000151308	0.00166967	1997	156728460	156728600	277	-0.419934	0.00480327	0.0325031	1545	156728620	156728766	249	-0.455647	0.00320583	0.0232598	1493	156728878	156729032	16	0.58252	0.0504082	0.202282	241	ENSG00000143303	+	RRNAD1	292.406	-0.21702
chr1	156750220	156751962	156751673	156751962	156750220	156750396	156751903	156752060	13	-0.348267	0.384973	0.695107	146	156751387	156751727	11354	-0.705482	3.07408e-10	9.27075e-09	92304	156750387	156750479	16	-0.310245	0.656287	0.87067	45	156750122	156750249	15	0.464049	0.359797	0.673557	78	ENSG00000143321	-	HDGF	13255.7	-0.682987
chr1	159924582	159925619	159925506	159925619	159924582	159924799	159925617	159925708	17	0.831546	0.308935	0.624448	32	159925427	159925550	1845	0.073932	0.517687	0.791632	9716	159924797	159924888	11	-0.174205	0.852192	0.952583	22	159924450	159924624	117	0.297965	0.0585543	0.224648	1293	ENSG00000158710	-	TAGLN2	15579.4	-0.124422
chr1	160343249	160343658	160343249	160343385	160343563	160343658	160343132	160343287	2290	0.464513	3.9341e-05	0.000501397	16312	160343351	160343480	6210	0.437781	1.51039e-05	0.000211879	14163	160343472	160343587	9	0.0479668	0.95289	0.986079	33	160343637	160343746	6	0.721129	0.494481	0.775973	19	ENSG00000162736	+	NCSTN	2678.29	0.360195
chr1	163321734	163322266	163321734	163322038	163322235	163322266	163321613	163321795	110	-0.0752928	0.660268	0.873018	957	163321996	163322144	623	-4.60702	4.49535e-233	7.53201e-230	9905	163322148	163322237	5	-0.409042	0.690382	NA	22	163322257	163322359	6	-1.61628	0.106331	0.336178	26	ENSG00000143228	+	NUF2	1015.89	-2.81818
chr1	167936561	167937176	167936561	167936695	167937042	167937176	167936445	167936573	13	-0.968407	0.0713529	0.25776	79	167936659	167936798	7319	0.545731	1.36823e-07	2.82455e-06	29717	167936956	167937062	8	0.581392	0.405186	0.711621	43	167937147	167937247	2	0.0739333	0.922658	0.976518	34	ENSG00000143164	+	DCAF6	2310.99	0.0606724
chr1	182839208	182839717	182839208	182839346	182839582	182839717	182839111	182839209	3	-0.183641	0.816813	0.939928	33	182839314	182839445	2261	-0.573514	1.00637e-05	0.000146241	9913	182839484	182839589	11	-1.10947	0.162836	0.438574	39	182839654	182839816	23	-1.87036	4.04922e-07	7.70154e-06	224	ENSG00000135829	+	DHX9	9230.92	-0.591693
chr1	193059338	193060133	193059338	193059634	193060075	193060133	193059242	193059392	1908	-1.42421	5.10593e-43	8.21131e-41	13351	193059579	193059745	1928	0.127401	0.236546	0.542492	11002	193059962	193060097	21	0.814005	0.0219652	0.109374	165	193060093	193060239	105	-0.489101	0.045528	0.188223	387	ENSG00000116747	+	RO60	508.378	-0.118036
chr1	197902557	197902990	197902557	197902622	197902887	197902990	197902471	197902603	9	-0.481599	0.488279	0.772099	45	197902611	197902722	459	0.752161	5.09253e-08	1.12547e-06	2764	197902779	197902894	4	-0.525036	0.437223	0.735922	45	197902971	197903105	59	1.15389	2.82524e-07	5.51925e-06	495	ENSG00000203724	+	C1orf53	90.57	0.191174
chr1	198156941	198157761	198156941	198157032	198157581	198157761	198156817	198156944	6	-1.03635	0.224015	0.527282	34	198156986	198157184	8140	0.308332	0.00125781	0.010594	45023	198157497	198157593	23	-1.42596	0.0390774	0.168255	54	198157730	198157834	3	-0.700867	0.305466	0.621256	47	ENSG00000151414	+	NEK7	2563.28	-0.0943797
chr1	201505586	201507212	201507122	201507212	201505586	201505662	201507201	201507373	90	0.502723	0.0353704	0.156391	455	201507053	201507193	1268	-0.168929	0.140835	0.401995	4799	201505655	201505793	5	-0.989594	0.230142	0.534787	33	201505496	201505596	9	-0.11559	0.909222	0.972444	23	ENSG00000159176	-	CSRP1	5567.31	0.507041
chr1	205631490	205632077	205631980	205632077	205631490	205631562	205632052	205632166	11	-0.302192	0.699189	0.891875	33	205631748	205632024	806	-0.324564	0.193287	0.485319	9356	205631554	205631664	5	-0.478487	0.533765	0.802826	37	205631399	205631491	12	-0.790852	0.244678	0.552756	50	ENSG00000158711	-	ELK4	1624.18	-0.129221
chr1	209649383	209651536	209651371	209651536	209649383	209649548	209651524	209651638	4	0.144461	0.858244	0.955096	30	209651249	209651413	467	0.259723	0.018647	0.096397	4571	209649537	209649642	9	0.0543235	0.941423	0.982588	37	209649277	209649387	3	-0.0206465	0.98041	0.993712	28	ENSG00000196878	-	LAMB3	15428.2	1.20667
chr1	209651371	209653362	209653065	209653362	209651371	209651536	209653354	209653450	7	0.143489	0.885511	0.964786	23	209652356	209653269	625	0.0403504	0.72189	0.901586	4676	209651524	209651638	4	0.144461	0.858244	0.955096	30	209651249	209651413	467	0.259723	0.018647	0.096397	4571	ENSG00000196878	-	LAMB3	15428.2	1.20667
chr1	211577805	211579417	211579160	211579417	211577805	211577900	211579418	211579523	3	-0.665813	0.467735	0.75716	24	211579033	211579208	833	1.45514	3.32979e-27	3.27287e-25	3677	211577890	211578047	17	0.805749	0.0123893	0.0699048	199	211577712	211577810	12	2.05217	0.0721392	NA	17	ENSG00000170385	-	SLC30A1	3157.99	0.954989
chr1	218345229	218346121	218345229	218345335	218346079	218346121	218345107	218345255	110	0.368487	0.2277	0.531668	264	218345312	218345412	29953	0.899039	2.71026e-17	1.58238e-15	96631	218345980	218346180	18	0.627751	0.050551	0.202708	212	218346082	218346220	331	0.961474	3.55633e-14	1.6414e-12	3979	ENSG00000092969	+	TGFB2	2785.63	-0.35702
chr1	218346079	218347511	218346079	218346121	218347360	218347511	218345980	218346180	18	0.627751	0.050551	0.202708	212	218346082	218346220	331	0.961474	3.55633e-14	1.6414e-12	3979	218347276	218347364	7	0.761659	0.408176	0.713991	23	218347500	218347607	8	0.658389	0.457964	0.750567	26	ENSG00000092969	+	TGFB2	2785.63	-0.35702
chr1	219173767	219174983	219173767	219173877	219174699	219174983	219173661	219173811	9	0.501645	0.397791	0.705412	59	219173841	219173977	3389	0.549732	2.54428e-06	4.15381e-05	10929	219174615	219174717	3	0.531033	0.617835	NA	17	219174844	219175077	191	0.966699	1.33828e-07	2.7667e-06	1168	ENSG00000143353	+	LYPLAL1	205.848	0.337851
chr1	222711477	222712563	222712473	222712563	222711477	222711586	222712536	222712685	807	-0.0956821	0.45143	0.74595	4381	222712370	222712493	4185	-0.495672	6.31572e-06	9.58252e-05	28524	222711534	222711707	52	-0.288762	0.146	0.410655	655	222711398	222711526	4	0.989499	0.277453	0.590851	23	ENSG00000186063	-	AIDA	422.22	-0.156223
chr1	224433983	224434922	224434796	224434922	224433983	224434205	224434848	224435150	42	0.329787	0.181182	0.466936	437	224434680	224434830	994	0.826569	9.29337e-13	3.74265e-11	6237	224434206	224434318	2	0.0273216	0.975874	0.992488	25	224433865	224434325	19	0.930254	0.00104356	0.00901933	270	ENSG00000162923	-	WDR26	3318.71	0.548876
chr1	243254505	243255419	243255202	243255419	243254505	243254714	243255381	243255527	16	0.240086	0.480748	0.76654	178	243254927	243255495	618	-0.319228	0.00584597	0.0381784	10977	243254693	243254800	5	-0.749669	0.436954	0.735663	22	243254378	243254569	43	0.0966809	0.666606	0.876186	460	ENSG00000143702	-	CEP170	1319.13	0.151864
chr1	244863019	244864685	244864482	244864685	244863019	244863172	244864673	244864776	6	-2.45501	0.012266	0.0693122	33	244864386	244864528	21084	-0.588048	4.84386e-09	1.25219e-07	95850	244863162	244863227	4	-0.386161	0.682807	0.884182	24	244862874	244863035	36	-0.976834	0.000913285	0.00801845	318	ENSG00000153187	-	HNRNPU	22347.1	-0.586417
chr1	244970631	244971082	244970976	244971082	244970631	244970845	244971070	244971207	5	-1.91452	0.0322399	0.146234	36	244970862	244971008	19	0.415443	0.287034	0.600986	145	244970803	244970943	12	-1.03083	0.0428898	0.180243	87	244970501	244970660	13	-1.15941	0.010037	0.0591812	135	ENSG00000272195	-	ENSG00000272195	20.7336	-0.708939
chr1	247331227	247332053	247331866	247332053	247331227	247331320	247331980	247332146	40	-0.587554	0.0761153	0.269346	248	247331602	247331904	708	0.0449314	0.735093	0.90729	3625	247331279	247331417	20	0.308052	0.453955	0.74781	122	247331135	247331240	3	-0.781551	0.560556	NA	13	ENSG00000162714	-	ZNF496	1912.21	-0.0872317
chr1	248838010	248838788	248838010	248838330	248838631	248838788	248837923	248838056	11	-2.62468	0.00228251	0.0175112	45	248838291	248838460	345	0.276437	0.0148118	0.0805394	4571	248838541	248838701	17	0.178651	0.682854	0.884182	113	248838754	248838883	9	0.921376	0.156905	0.429551	51	ENSG00000171161	+	ZNF672	616.832	-0.218036
chr10	1048927	1049291	1049117	1049291	1048927	1049094	1049289	1049381	8	0.00807025	0.994117	NA	16	1049025	1049128	536	-0.544145	0.00173967	0.0139466	985	1049060	1049184	101	0.224468	0.36838	0.680984	394	1048797	1048962	337	-0.438513	0.00190661	0.0150885	2010	ENSG00000067064	-	IDI1	606.153	-0.791604
chr10	3067408	3069229	3067408	3067547	3069132	3069229	3067290	3067435	6	1.46311	0.0371997	0.162108	45	3067511	3067642	25641	-0.0459649	0.684546	0.884766	39938	3069038	3069139	4	-1.54355	0.169467	NA	20	3069217	3069329	14	1.45333	0.0183756	0.0953203	53	ENSG00000067057	+	PFKP	2862.48	-0.218929
chr10	5812932	5813667	5813433	5813667	5812932	5812995	5813616	5813768	20	-2.0191	6.75134e-09	1.70972e-07	246	5813338	5813458	26718	-0.0667917	0.596563	0.83971	100208	5812994	5813084	12	-0.704147	0.175715	0.459001	80	5812817	5812933	3	0.289782	0.684376	0.884685	37	ENSG00000057608	-	GDI2	6054.29	-0.353214
chr10	13299564	13300188	13300063	13300188	13299564	13299699	13300180	13300282	23	0.234539	0.721698	0.901473	44	13299969	13300120	1343	0.52984	2.38727e-07	4.73425e-06	6753	13299662	13299762	5	-0.131621	0.867897	0.958496	33	13299477	13299570	6	1.558	0.121533	0.366709	20	ENSG00000107537	-	PHYH	319.148	0.512531
chr10	13348004	13348417	13348212	13348417	13348004	13348094	13348355	13348530	26	-2.1788	1.30322e-07	2.69808e-06	178	13348123	13348272	628	-1.55859	1.99411e-29	2.15396e-27	4421	13348054	13348187	5	-0.527215	0.476803	0.76379	37	13347871	13348035	46	-0.717261	0.0127966	0.0717702	304	ENSG00000086475	-	SEPHS1	1357.47	-0.943779
chr10	21525989	21526570	21525989	21526119	21526409	21526570	21525905	21525994	6	-0.513799	0.683794	NA	15	21526030	21526206	9	-0.707611	0.1934	0.485519	77	21526293	21526422	5	0.701142	0.31977	0.635719	40	21526548	21526654	4	-0.570799	0.541508	0.807611	23	ENSG00000286881	+	ENSG00000286881	8.00245	-0.534425
chr10	27242110	27243111	27243045	27243111	27242110	27242210	27243112	27243226	8	0.396305	0.529098	0.799662	60	27242950	27243082	14	-0.724829	0.164748	0.441528	84	27242185	27242334	12	-0.867122	0.0521095	0.20701	113	27241998	27242140	13	0.578823	0.242951	0.550638	86	ENSG00000107897	-	ACBD5	821.124	0.0782088
chr10	28533003	28533715	28533003	28533130	28533531	28533715	28532885	28533056	37	0.636564	0.00500655	0.0336355	487	28533101	28533258	2235	-0.459286	0.2729	0.585932	14642	28533488	28533574	5	-0.838725	0.415766	0.720166	22	28533680	28533845	114	0.494216	0.0790947	0.27636	304	ENSG00000095787	+	WAC	3114.4	-0.252222
chr10	31319019	31319780	31319019	31319215	31319687	31319780	31318808	31319084	96	-0.265765	0.113549	0.35102	1021	31319175	31319308	340	-0.413986	0.00911214	0.0547405	1515	31319558	31319714	39	0.627684	0.058531	0.22457	229	31319764	31319866	5	-0.882289	0.256664	0.567601	38	ENSG00000148516	+	ZEB1	999.957	-0.00445385
chr10	32957960	32958511	32958229	32958511	32957960	32958073	32958432	32958607	25	-0.938605	0.00420897	0.0291296	247	32958133	32958281	42144	0.442285	2.58365e-05	0.000343439	219965	32958066	32958154	9	0.276827	0.715548	0.899234	33	32957862	32957989	8456	0.661524	1.67195e-09	4.58368e-08	31294	ENSG00000150093	-	ITGB1	26238	0.211927
chr10	32982336	32983503	32982336	32982550	32983384	32983503	32982252	32982346	23	0.636291	0.44567	0.742083	35	32982518	32982692	319	0.897895	9.87095e-07	1.74393e-05	904	32983265	32983395	7	-0.0541457	0.945437	0.983671	37	32983491	32983598	17	0.614012	0.365751	0.678685	43	ENSG00000229656	+	ITGB1-DT	78.7262	0.679635
chr10	43408846	43409431	43409181	43409431	43408846	43408933	43409373	43409518	13	-1.97054	0.00381797	0.0268521	68	43409086	43409219	544	-0.837121	1.27101e-07	2.63615e-06	2613	43408927	43409030	7	-0.829569	0.301167	0.616742	33	43408714	43408884	19	-3.36476	1.30413e-16	7.24988e-15	288	ENSG00000169813	-	HNRNPF	14229.6	-0.331154
chr10	52314537	52315207	52314537	52314657	52315112	52315207	52314447	52314551	5	-0.660329	0.440321	0.738227	31	52314635	52314783	37	-0.715821	0.0104003	0.0608452	304	52314983	52315140	34	0.188968	0.58351	0.832011	207	52315193	52315308	4	-0.932636	0.257737	0.568734	43	ENSG00000107984	+	DKK1	2.54995	-2.26282
chr10	62804463	62806060	62804463	62804719	62805970	62806060	62804369	62804469	3	-2.40839	0.0833661	NA	16	62804692	62805005	3229	-0.0986825	0.366231	0.679208	14364	62805878	62806011	11	0.58655	0.381495	0.692454	43	62806057	62806150	19	-0.421781	0.526537	0.797717	51	ENSG00000181915	+	ADO	1301.13	-0.100877
chr10	72273705	72275325	72273705	72273923	72275236	72275325	72273519	72273711	5	-0.80262	0.155983	0.42776	80	72273913	72274018	5547	0.349755	0.0033646	0.0242191	7877	72275147	72275241	3	1.28997	0.118801	0.361135	29	72275285	72275460	68	0.161421	0.528348	0.799099	401	ENSG00000168209	+	DDIT4	1177.96	2.05873
chr10	73246891	73247410	73247254	73247410	73246891	73246993	73247396	73247510	15	-1.26534	0.0233849	0.11484	84	73247156	73247294	6852	-3.41818	5.70232e-178	4.94982e-175	21313	73246949	73247089	8	-2.7271	8.73175e-06	0.000128676	96	73246694	73246962	296	-0.553015	2.7802e-05	0.000366792	2915	ENSG00000213551	-	DNAJC9	2012.14	-2.08486
chr10	73495619	73496129	73496015	73496129	73495619	73495720	73496121	73496225	11	-0.197278	0.771174	0.922463	45	73495854	73496037	597	0.116288	0.28005	0.593462	5833	73495682	73495848	231	0.315454	0.16906	0.448413	585	73495521	73495679	158	0.951312	2.06587e-08	4.87839e-07	1184	ENSG00000107758	-	PPP3CB	2088.6	0.0411421
chr10	73911005	73911780	73911005	73911131	73911743	73911780	73910914	73911012	3	0.594013	0.563623	NA	19	73911095	73911228	21639	0.229526	0.0461632	0.189955	51646	73911523	73911790	20	0.398416	0.298303	0.613414	154	73911772	73911874	3	-0.357063	0.715063	0.899032	25	ENSG00000122861	+	PLAU	1038.29	-0.0258647
chr10	75400928	75401511	75401389	75401511	75400928	75401063	75401481	75401646	9	1.1975	0.00156093	0.0127188	149	75401291	75401460	42	1.03562	0.000547061	0.00511871	234	75401062	75401153	13	0.747612	0.278847	0.592253	41	75400802	75400936	15	0.853447	0.181594	0.467694	51	ENSG00000270087	-	ENSG00000270087	0	NA
chr10	75401389	75401904	75401763	75401904	75401389	75401511	75401868	75402177	19	0.40629	0.174578	0.457509	241	75401669	75401935	1315	0.536497	0.00231853	0.0177309	2815	75401481	75401646	9	1.1975	0.00156093	0.0127188	149	75401291	75401460	42	1.03562	0.000547061	0.00511871	234	ENSG00000165655	-	ZNF503	868.392	-0.971701
chr10	87094086	87095205	87094888	87095205	87094086	87094163	87095102	87095273	162	-0.479453	0.00334626	0.0241137	1626	87094746	87095074	1497	-0.041572	0.734646	0.907081	19414	87094125	87094589	19	-0.514134	0.0809203	0.280724	274	87093991	87094094	7	0.357701	0.608538	0.846485	40	ENSG00000148672	-	GLUD1	2415.38	-0.156854
chr10	89643915	89645290	89645241	89645290	89643915	89644170	89645262	89645377	5	0.416569	0.518134	0.791799	48	89644876	89645281	294	0.334753	0.0293735	0.136432	2632	89644166	89644270	13	-1.95711	0.00640515	0.0411808	61	89643828	89643947	33	-0.474193	0.27826	0.591851	117	ENSG00000152782	-	PANK1	296.772	0.774055
chr10	96586546	96587090	96587011	96587090	96586546	96586630	96587091	96587226	6	-1.49853	0.0151201	0.081851	66	96586884	96587056	12908	-0.0267953	0.851708	0.952415	84753	96586595	96586722	24	0.592965	0.134778	0.391435	150	96586429	96586594	16	0.789041	0.0578889	0.223033	121	ENSG00000077147	-	TM9SF3	7666.88	0.0651145
chr10	96832169	96832628	96832169	96832297	96832514	96832628	96832078	96832232	15	0.744121	0.0361046	0.158689	166	96832252	96832392	1199	0.35869	0.00265307	0.0199068	9122	96832429	96832544	3	1.15518	0.199748	0.494629	25	96832629	96832798	12	0.612971	0.185621	0.47368	109	ENSG00000196233	+	LCOR	3064.94	0.083815
chr10	97333815	97334872	97334728	97334872	97333815	97333877	97334844	97334946	6	-0.501015	0.500002	0.779294	37	97334601	97334763	102	-0.510937	0.00411348	0.0285735	960	97333859	97333964	5	-0.373841	0.662143	0.873933	27	97333726	97333823	8	-0.791649	0.286625	0.600484	41	ENSG00000181274	-	FRAT2	312.881	0.401818
chr10	100373304	100374151	100373304	100373626	100374002	100374151	100373180	100373359	8	-1.05133	0.0256617	0.123355	110	100373567	100373743	125	-0.921112	2.6945e-05	0.000356465	630	100373897	100374027	19	-0.775976	0.0543224	0.213471	137	100374113	100374393	15	-0.866702	0.0819221	0.282932	100	ENSG00000235823	+	OLMALINC	301.389	-0.598995
chr10	102119653	102120698	102120486	102120698	102119653	102119888	102120560	102120723	21	0.2717	0.418007	0.721695	187	102120239	102120505	1092	0.624675	1.05268e-06	1.84982e-05	8850	102119856	102119998	42	0.554427	0.127758	0.378375	160	102119559	102119683	6	0.640887	0.344314	0.65826	42	ENSG00000198728	-	LDB1	2910.5	0.119551
chr10	102449738	102450639	102449738	102449838	102450599	102450639	102449636	102449748	2	-2.30744	0.0465215	0.191002	22	102449750	102449965	146	0.0233397	0.89369	0.967319	897	102450285	102450601	10	-0.936296	0.0188415	0.0971428	149	102450622	102450782	44	-0.0381892	0.886326	0.965113	332	ENSG00000269609	+	C10orf95-AS1	321.813	-0.324917
chr10	102643841	102644484	102643841	102643860	102644411	102644484	102643747	102643847	2	-1.30423	0.225219	NA	21	102643855	102644001	199	0.709343	3.70584e-05	0.000475333	1473	102644315	102644427	5	-0.746782	0.340851	0.655017	35	102644439	102644600	98	-0.906634	6.51591e-06	9.86451e-05	816	ENSG00000171206	+	TRIM8	2119.46	0.89908
chr10	102776079	102777325	102776079	102776220	102777089	102777325	102775985	102776081	25	0.523153	0.434133	0.7334	48	102776178	102776312	407	0.470149	0.000110444	0.00125626	2992	102776995	102777132	32	0.546887	0.113263	0.350406	183	102777324	102777413	8	0.433175	0.6782	NA	18	ENSG00000166272	+	WBP1L	2186.38	0.360721
chr10	103917807	103918545	103918183	103918545	103917807	103917871	103918540	103918636	8	-2.76583	0.013954	0.0769531	29	103918087	103918249	589	0.695104	2.02122e-07	4.06428e-06	3067	103917865	103917966	8	-1.00823	0.296821	0.611667	25	103917505	103917818	53	0.0246622	0.905191	0.971122	552	ENSG00000107960	-	STN1	782.424	0.466383
chr10	125159240	125160756	125160530	125160756	125159240	125159491	125160733	125160842	2	-0.988438	0.343202	0.657205	21	125160302	125160592	1704	-0.332624	0.00737035	0.0462191	9416	125159445	125159577	4	-1.78275	0.026181	0.125258	42	125158950	125159399	28	0.730216	0.000984774	0.0085678	477	ENSG00000175029	-	CTBP2	2716.02	0.0388814
chr11	207390	208804	207390	207711	208689	208804	207278	207406	241	0.157692	0.308794	0.624338	1613	207474	207808	866	-0.0565131	0.649444	0.86776	4862	208577	208759	70	0.0699112	0.828633	0.944462	209	208769	208925	851	-0.0724829	0.522373	0.795099	8054	ENSG00000177963	+	RIC8A	4461.85	-0.222677
chr11	506366	506988	506767	506988	506366	506461	506979	507106	9	0.0832547	0.899954	0.969352	45	506651	506814	1162	0.236018	0.0427452	0.179813	5583	506461	506558	15	-0.0484861	0.945299	0.983631	43	506273	506400	11	-0.0367228	0.957802	0.987326	45	ENSG00000023191	-	RNH1	3520.67	-0.0432822
chr11	506767	507477	507231	507477	506767	506988	507471	507574	4	-0.0463262	0.961342	0.988444	21	507131	507275	1290	0.143126	0.207444	0.504736	9064	506979	507106	9	0.0832547	0.899954	0.969352	45	506651	506814	1162	0.236018	0.0427452	0.179813	5583	ENSG00000023191	-	RNH1	3520.67	-0.0432822
chr11	2928664	2929785	2929419	2929785	2928664	2928911	2929759	2929874	4	-0.799272	0.259436	0.57074	47	2929331	2929432	37575	0.0318905	0.762751	0.918916	53221	2928886	2928998	3	0.0420107	0.95658	0.986955	33	2928540	2928675	18	0.160011	0.787373	0.929334	76	ENSG00000181649	-	PHLDA2	776.876	0.821545
chr11	6390244	6391759	6390244	6390473	6391631	6391759	6390131	6390261	7	-0.0188094	0.971184	0.991257	80	6390408	6390584	2084	0.910315	8.92187e-20	6.11602e-18	9492	6391546	6391656	8	1.10382	0.247482	0.556259	27	6391760	6391846	6	0.679897	0.510329	0.786367	20	ENSG00000166311	+	SMPD1	1054.37	1.1469
chr11	9573369	9574677	9573369	9573705	9574588	9574677	9573272	9573398	23	-0.583437	0.210552	0.508538	97	9573664	9574193	280	-0.980093	3.51952e-12	1.32068e-10	4233	9574493	9574589	6	1.22553	0.11153	0.346952	40	9574676	9574774	5	1.9448	0.0118272	0.0673023	36	ENSG00000166483	+	WEE1	1247.6	-1.51193
chr11	10455139	10456055	10455139	10455263	10455931	10456055	10455051	10455143	23	-0.549094	0.3327	0.64735	69	10455108	10455274	67	0.726811	0.000104919	0.00120081	712	10455831	10455936	4	0.652523	0.451597	0.746106	26	10456046	10456152	20	0.436078	0.437799	0.736355	61	ENSG00000133805	+	AMPD3	146.427	0.603885
chr11	10807909	10809205	10808922	10809205	10807909	10808084	10809199	10809297	7	-1.02792	0.024307	0.118359	109	10808827	10808953	33058	-0.213525	0.0590752	0.226043	123076	10808065	10808154	4	-0.275571	0.712441	0.89793	38	10807791	10807916	5	-1.06919	0.102804	0.329055	55	ENSG00000110321	-	EIF4G2	40829.7	-0.257679
chr11	12086704	12087375	12086704	12086870	12087247	12087375	12086615	12086757	6	0.378692	0.563862	0.820913	60	12086865	12086964	53	0.4638	0.207361	0.504635	173	12087159	12087252	3	0.785004	0.415118	0.719635	23	12087365	12087472	8	-0.798405	0.30803	0.623664	35	ENSG00000255400	+	ENSG00000255400	3.46613	3.96288
chr11	12285054	12287240	12285054	12285208	12287142	12287240	12284959	12285065	6	-0.276073	0.761221	0.91827	26	12285167	12285318	20	0.244384	0.537449	0.805145	126	12286984	12287154	5	0.60435	0.358158	0.671958	46	12287229	12287339	8	0.342309	0.517672	0.791632	71	ENSG00000133816	+	MICAL2	10105.4	1.17362
chr11	19712641	19714168	19712641	19712836	19714086	19714168	19712556	19712711	14	-0.826164	0.0832157	0.286056	96	19712798	19712931	2088	-0.623514	8.78535e-08	1.87155e-06	4846	19713969	19714124	12	0.770111	0.098513	0.319739	92	19714137	19714280	23	0.312412	0.53278	0.802215	88	ENSG00000166833	+	NAV2	919.278	0.0500466
chr11	59142708	59143173	59142708	59142858	59143055	59143173	59142607	59142785	62	0.672638	2.06875e-05	0.000281433	1178	59142819	59142975	183	-0.300039	0.0725856	0.260833	1222	59142902	59143210	12	0.669109	0.0287513	0.134318	232	59143145	59143298	44	-0.0165988	0.94724	0.983991	384	ENSG00000166801	+	FAM111A	1572.05	-1.53958
chr11	61429299	61430124	61429994	61430124	61429299	61429480	61430040	61430207	302	0.420988	0.0020723	0.0161706	3615	61429631	61430033	678	-0.345491	0.0104825	0.0612519	2078	61429467	61429610	10	-0.55671	0.339748	0.653992	62	61429213	61429303	56	-0.464955	0.39692	0.704567	77	ENSG00000149532	-	CPSF7	3491.02	-0.498172
chr11	61815147	61816984	61816854	61816984	61815147	61815432	61816974	61817081	3	0.156822	0.87392	NA	20	61816703	61817097	5472	0.0508464	0.687771	0.886115	18588	61815406	61815566	46	0.148683	0.644683	0.865449	214	61815021	61815183	34	0.38505	0.228801	0.533063	205	ENSG00000149485	-	FADS1	5350.33	-0.553772
chr11	61967150	61967782	61967630	61967782	61967150	61967352	61967771	61967901	6	-0.336108	0.567967	0.823147	65	61967540	61967668	596943	0.977367	2.05744e-21	1.53608e-19	768290	61967310	61967468	61	0.857946	0.000313108	0.00315195	417	61967060	61967200	12	2.35523	1.85131e-06	3.09254e-05	98	ENSG00000167996	-	FTH1	34006.8	0.74354
chr11	62612529	62613135	62612745	62613135	62612529	62612670	62613127	62613356	10	1.60915	0.0191588	0.0983143	49	62612651	62612944	668	0.547077	0.000505671	0.004783	2508	62612671	62612765	3	1.05419	0.297904	0.612899	21	62612475	62612600	131	0.392633	0.0172413	0.0906497	1271	ENSG00000149499	-	EML3	1557.25	0.450812
chr11	62726734	62727696	62727456	62727696	62726734	62726975	62727672	62727788	12	0.664795	0.22867	0.532885	64	62727329	62727498	1697	-0.68065	2.04879e-09	5.55968e-08	7248	62726860	62727003	6	-0.423419	0.436476	0.735193	73	62726607	62726972	47	-0.587791	0.00100977	0.00875888	926	ENSG00000214753	-	HNRNPUL2	583.496	-0.552541
chr11	62753851	62754396	62754159	62754396	62753851	62753937	62754384	62754490	6	-0.601235	0.42201	0.724636	40	62754063	62754172	83	0.381627	0.0882566	0.297438	464	62753929	62754025	10	-0.367101	0.57979	0.830099	47	62753757	62753861	8	1.01865	0.164114	0.440547	36	ENSG00000185670	-	ZBTB3	154.838	0.276616
chr11	64234375	64235142	64234375	64234583	64235044	64235142	64234246	64234411	26	0.843491	0.0958973	0.314465	76	64234392	64234684	259	0.597935	8.92116e-05	0.00104223	2046	64234956	64235086	15	-0.0269265	0.964313	0.989229	79	64235132	64235237	4	1.72246	0.148591	NA	17	ENSG00000173511	+	VEGFB	1852.37	-0.175454
chr11	64246240	64247078	64246819	64247078	64246240	64246321	64247029	64247190	143	1.06539	1.26271e-09	3.51659e-08	929	64246568	64246927	6291	-0.374961	0.132738	0.387509	92466	64246314	64246417	10	-1.22249	0.275696	NA	22	64246150	64246243	22	0.736735	0.161203	0.436059	74	ENSG00000173457	-	PPP1R14B	3319.34	-0.306845
chr11	64269924	64270530	64269924	64270239	64270331	64270530	64269830	64269940	3	-1.25649	0.0722794	0.260038	49	64270226	64270388	30	-0.0217006	0.95306	0.986093	151	64270137	64270342	14	-0.0395469	0.927323	0.977848	117	64270494	64270626	7	0.710816	0.214476	0.514016	62	ENSG00000173264	+	GPR137	1541.68	-0.250184
chr11	65084039	65084445	65084039	65084243	65084374	65084445	65083943	65084103	813	-4.49208	3.30547e-180	3.01455e-177	5520	65084192	65084360	1597	0.327408	0.00182079	0.0145113	9726	65084285	65084382	5	-0.683539	0.46549	0.755624	24	65084417	65084590	53	0.456182	0.132526	0.387189	240	ENSG00000162300	+	ZFPL1	1425.49	0.152308
chr11	65120748	65122320	65122187	65122320	65120748	65120761	65122285	65122434	2224	0.412299	4.2646e-05	0.000538755	11805	65122065	65122200	39735	0.0958735	0.302352	0.617797	101344	65120701	65120812	20	-0.0551347	0.92003	0.975561	69	65120687	65120776	8	0.361869	0.618579	0.852479	40	ENSG00000149806	-	FAU	6384.52	0.0887183
chr11	65857012	65858465	65858179	65858465	65857012	65857322	65858454	65858561	6	0.809329	0.368688	0.681195	27	65858088	65858222	297313	0.144901	0.168953	0.448262	555049	65857294	65857443	13	1.0311	0.00987907	0.058475	135	65856869	65857025	138	0.687782	0.000722391	0.00653394	677	ENSG00000172757	-	CFL1	26903.6	-0.209487
chr11	65860426	65861434	65860426	65860547	65861374	65861434	65860306	65860435	13	-0.47191	0.348054	0.662164	81	65860481	65860843	337	-0.171979	0.13306	0.388169	4941	65861275	65861414	46	0.087861	0.72978	0.904638	369	65861435	65861522	20	0.473881	0.472416	0.760448	44	ENSG00000172732	+	MUS81	670.268	-0.371171
chr11	65899332	65900749	65900418	65900749	65899332	65899477	65900745	65900889	6	-2.11875	0.0107178	0.0623533	47	65900292	65900583	19661	-1.24472	1.30432e-35	1.7024e-33	90575	65899434	65899612	53	-0.263884	0.370049	0.682604	253	65899092	65899382	33	-0.281274	0.265556	0.577532	366	ENSG00000175592	-	FOSL1	1823.63	0.988201
chr11	65919033	65919923	65919033	65919274	65919827	65919923	65918939	65919075	8486	-0.248164	0.564983	0.821654	15251	65919263	65919551	14393	-0.290974	0.00266709	0.0199954	106468	65919763	65919857	7	0.395943	0.654611	0.869853	24	65919686	65920052	1366	0.316539	0.00756252	0.0471533	20746	ENSG00000175550	+	DRAP1	7444.83	0.0332731
chr11	65919827	65921329	65919827	65919923	65921126	65921329	65919763	65919857	7	0.395943	0.654611	0.869853	24	65919686	65920052	1366	0.316539	0.00756252	0.0471533	20746	65920868	65921173	67	1.053	4.08989e-06	6.4267e-05	487	65921328	65921417	6	0.423718	0.663922	0.874695	25	ENSG00000175550	+	DRAP1	7444.83	0.0332731
chr11	67352758	67353834	67353533	67353834	67352758	67353115	67353830	67353934	16	-0.254142	0.694064	0.889345	48	67353395	67353563	5197	1.42526	1.98797e-45	3.37799e-43	32238	67353112	67353223	3	0.723446	0.520044	NA	18	67352694	67352836	27	1.88024	8.00932e-08	1.71689e-06	222	ENSG00000175482	-	POLD4	145.068	1.64281
chr11	69299046	69300314	69299046	69299213	69300208	69300314	69298959	69299085	29	0.0960722	0.854604	0.953358	75	69299152	69299313	18889	0.77832	2.76912e-17	1.61544e-15	55771	69300124	69300216	10	-0.247452	0.75382	0.915449	33	69300274	69300402	44	-0.0608772	0.877115	0.961391	134	ENSG00000172927	+	MYEOV	7069.96	0.285205
chr11	72814313	72814995	72814313	72814431	72814644	72814995	72814195	72814320	5	-2.36993	0.0082462	0.0504984	38	72814383	72814527	519	0.0879869	0.569581	0.82426	2487	72814559	72814660	3	-0.13175	0.910233	NA	19	72814987	72815085	29	0.20628	0.697224	0.891004	71	ENSG00000168010	+	ATG16L2	236.249	1.11277
chr11	73308165	73309368	73308165	73308275	73309253	73309368	73308062	73308172	4	0.538342	0.489372	0.77263	32	73308249	73308613	391	0.801753	1.30246e-08	3.16379e-07	2389	73309129	73309305	17	1.52677	7.92241e-09	1.98742e-07	353	73309355	73309482	34	1.37065	2.65812e-07	5.22822e-06	327	ENSG00000110237	+	ARHGEF17	1799.94	0.26909
chr11	73760159	73761415	73761085	73761415	73760159	73760303	73761407	73761511	6	-0.922513	0.42656	NA	17	73760977	73761120	2123	0.322851	0.00963433	0.0572332	12487	73760291	73760399	16	0.0319218	0.94258	0.982879	105	73760075	73760167	3	0.65172	0.490331	0.773235	22	ENSG00000175582	-	RAB6A	2126.18	0.21567
chr11	74493072	74493777	74493072	74493379	74493709	74493777	74492978	74493077	9	-4.04211	0.00462512	0.0315078	25	74493342	74493498	114	0.425404	0.0551167	0.215475	472	74493595	74493746	63	-0.169676	0.471515	0.759626	414	74493764	74493875	11	0.592067	0.356779	0.670691	48	ENSG00000254837	+	ENSG00000254837	63.0679	0.144835
chr11	75562062	75562863	75562062	75562252	75562734	75562863	75561964	75562075	6	-1.17236	0.19933	0.494037	28	75562210	75562342	3485	0.078488	0.522821	0.795405	10058	75562609	75562770	58	-0.550078	0.107272	0.33803	205	75562808	75562976	14	-0.31234	0.376562	0.688035	182	ENSG00000149257	+	SERPINH1	11044.1	-0.376692
chr11	76783063	76784147	76783063	76783310	76784024	76784147	76782985	76783101	17	-0.336474	0.420446	0.723361	120	76783272	76783412	261	0.564223	2.283e-05	0.000306871	3341	76783768	76784032	21	1.38599	0.00168543	0.0135858	114	76784139	76784288	69	3.91819	5.17064e-21	3.77819e-19	239	ENSG00000182704	+	TSKU	2848.94	1.07534
chr11	86671653	86672234	86672148	86672234	86671653	86671785	86672181	86672355	21	0.141304	0.691635	0.888179	164	86671826	86672188	305	0.491079	0.000682031	0.00621532	2269	86671735	86671912	47	0.456933	0.123369	0.370164	245	86671515	86671657	21	0.590297	0.215856	0.516139	88	ENSG00000151376	-	ME3	20.257	1.4555
chr11	102110280	102110636	102110280	102110446	102110522	102110636	102110196	102110336	28	0.0839076	0.819618	0.940842	165	102110393	102110543	2188	0.55627	4.36186e-06	6.81395e-05	9889	102110434	102110545	3	0.544971	0.440651	0.738385	41	102110594	102110764	673	-0.0177071	0.958965	0.987713	3423	ENSG00000137693	+	YAP1	4550.85	0.578863
chr11	111540594	111541333	111540594	111540719	111541281	111541333	111540499	111540601	3	-0.791979	0.443905	NA	20	111540656	111540860	2153	0.664385	2.42724e-09	6.53985e-08	14017	111541178	111541288	8	1.30426	0.0511426	0.20425	47	111541312	111541460	58	1.19467	1.01781e-07	2.14303e-06	481	ENSG00000204381	+	LAYN	5336.72	0.999296
chr11	117199045	117200196	117199045	117199372	117200009	117200196	117198917	117199096	27	0.449669	0.182412	0.469005	190	117199298	117199593	4440	0.712406	4.04704e-12	1.50998e-10	18408	117199922	117200042	34	1.15914	0.0158111	0.0848142	87	117200164	117200286	5	1.01366	0.143781	0.406872	42	ENSG00000149591	+	TAGLN	2364.77	-0.0833514
chr11	117204366	117204999	117204366	117204370	117204716	117204999	117204223	117204375	21	0.900462	0.0455867	0.188368	120	117204208	117204792	1085	0.656988	1.68542e-06	2.84444e-05	5542	117204446	117204731	92	0.411863	0.274473	0.587421	829	117204850	117205131	8	0.628303	0.260701	0.572134	66	ENSG00000280143	+	ENSG00000280143	0.388791	1.46048
chr11	122178775	122180893	122180631	122180893	122178775	122178898	122180873	122180959	40	-0.234683	0.571589	0.825696	151	122180308	122180789	1429	0.41457	0.00367764	0.026064	8593	122178894	122178985	7	0.259999	0.738679	0.908825	33	122178681	122178778	13	0.73644	0.301828	0.617357	43	ENSG00000255248	-	MIR100HG	234.521	1.61763
chr12	2812535	2813009	2812535	2812676	2812894	2813009	2812443	2812538	20	1.36224	0.0332405	0.149418	52	2812637	2812796	243	-0.228063	0.124978	0.373373	1470	2812802	2812929	84	-0.0510776	0.833948	0.946451	395	2812994	2813103	4	0.140337	0.894132	NA	19	ENSG00000111203	+	ITFG2	332.061	-0.589085
chr12	2959831	2960121	2959831	2959943	2960047	2960121	2959737	2959881	27	0.0988042	0.758244	0.917111	220	2959774	2960041	202	-0.330385	0.0543887	0.213614	986	2959948	2960089	26	0.00630064	0.983238	0.994616	246	2960095	2960234	5	-0.256503	0.610545	0.847559	81	ENSG00000197905	+	TEAD4	2731.19	-0.140437
chr12	6688924	6689747	6689374	6689747	6688924	6689088	6689683	6689845	26	-0.605707	0.119035	0.361633	155	6689180	6689526	125	0.08261	0.561254	0.819466	1783	6689078	6689183	7	-1.62826	0.0673094	0.247635	36	6688799	6688973	123	-0.192556	0.219869	0.522026	1315	ENSG00000126746	-	ZNF384	3039.66	-0.2026
chr12	6927630	6928500	6927630	6927812	6928425	6928500	6927518	6927645	6	0.270401	0.663693	0.874496	53	6927478	6928139	811	0.0259092	0.872671	0.959933	8332	6928334	6928430	7	-0.965951	0.319549	0.635456	25	6928492	6928620	10	1.13813	0.0516159	0.205684	62	ENSG00000111676	+	ATN1	7217.31	0.10241
chr12	9447853	9448294	9448209	9448294	9447853	9447981	9448286	9448424	5	-3.7291	0.00219282	0.0169495	37	9448101	9448240	79	-4.56243	2.2185e-33	2.72758e-31	652	9447980	9448073	6	-4.61958	0.00228638	NA	17	9447756	9447882	14	-2.53046	0.000989876	0.00860284	60	ENSG00000214826	-	DDX12P	568.642	-1.59082
chr12	30795644	30796099	30795644	30795698	30795983	30796099	30795559	30795655	5	-0.924619	0.3902	NA	20	30795665	30795821	714	0.361274	0.00588655	0.0384087	2102	30795889	30795985	7	1.48864	0.100872	0.324907	25	30795909	30796197	36	0.842886	0.000170327	0.00185483	448	ENSG00000285517	+	ENSG00000285517	258.894	2.06251
chr12	30795983	30796308	30795983	30796099	30796169	30796308	30795889	30795985	7	1.48864	0.100872	0.324907	25	30795909	30796197	36	0.842886	0.000170327	0.00185483	448	30796097	30796182	7	-0.0643275	0.927111	0.9778	43	30796252	30796446	25	0.431723	0.111495	0.346919	326	ENSG00000285517	+	ENSG00000285517	258.894	2.06251
chr12	30796169	30796667	30796169	30796308	30796578	30796667	30796097	30796182	7	-0.0643275	0.927111	0.9778	43	30796252	30796446	25	0.431723	0.111495	0.346919	326	30796482	30796591	4	-0.703949	0.440931	0.738755	29	30796639	30796738	5	-0.663248	0.545892	NA	18	ENSG00000285517	+	ENSG00000285517	258.894	2.06251
chr12	31073750	31074264	31073750	31073855	31074086	31074264	31073654	31073801	20	-2.11475	2.35066e-08	5.50221e-07	223	31073830	31073973	301	-2.80456	6.94885e-57	1.48559e-54	1616	31073996	31074102	3	-4.85857	0.00118388	NA	22	31074198	31074354	36	-1.49674	5.61779e-08	1.23436e-06	361	ENSG00000013573	+	DDX11	1534.15	-1.07338
chr12	32755187	32756016	32755896	32756016	32755187	32755355	32756008	32756105	9	-1.41142	0.0918857	0.305764	35	32755792	32755926	614	-0.149881	0.335489	0.64974	1943	32755306	32755451	4	-0.43678	0.497504	0.77779	53	32755096	32755236	32	1.23448	3.14132e-05	0.000408967	262	ENSG00000139131	-	YARS2	1650.56	-0.112162
chr12	49322981	49324529	49322981	49323254	49324408	49324529	49322847	49323017	14	-1.49535	0.00191856	0.0151631	123	49323243	49323362	2326	-2.75937	2.65502e-93	1.01748e-90	6711	49324318	49324414	9	0.208904	0.835334	0.947093	24	49324529	49324757	12	-0.984394	0.0361442	0.158807	110	ENSG00000135451	+	TROAP	1078.8	-2.27058
chr12	53006118	53007039	53006118	53006455	53006891	53007039	53006009	53006160	39	-1.37714	1.67358e-05	0.00023237	256	53006253	53006551	604	-0.0153613	0.925383	0.977138	1230	53006799	53006894	7	-1.82625	0.0387318	0.167127	33	53007006	53007134	23	-1.73322	0.00111076	0.00952478	98	ENSG00000063046	+	EIF4B	9312.21	0.142053
chr12	53180597	53181101	53180597	53180721	53180916	53181101	53180353	53180660	48	0.200417	0.530304	0.800465	228	53180554	53180821	548	0.0210778	0.861444	0.956589	4013	53180803	53180938	3	1.55221	0.0698919	0.253952	29	53181083	53181241	15	-2.19892	0.000134557	0.00150069	89	ENSG00000139651	+	ZNF740	1202.73	0.0638201
chr12	53501185	53501585	53501185	53501285	53501538	53501585	53501097	53501217	7	-0.246672	0.733937	0.906703	42	53501128	53501413	577	0.150306	0.182406	0.469005	6538	53501426	53501575	97	-0.200955	0.506518	0.783708	262	53501578	53501700	87	0.314065	0.240433	0.54748	326	ENSG00000139546	+	TARBP2	1278.16	-0.328251
chr12	55715998	55717174	55715998	55716076	55717001	55717174	55715908	55716037	11	0.260922	0.588357	0.8348	97	55716036	55716197	3385	0.52357	4.38548e-07	8.27989e-06	27652	55716907	55717010	11	-1.07824	0.128558	0.379693	44	55717171	55717265	4	-0.854125	0.38021	0.691376	24	ENSG00000258311	+	ENSG00000258311	40.7781	0.605387
chr12	57110288	57111435	57111345	57111435	57110288	57110421	57111427	57111560	8	-0.38728	0.566593	0.82258	49	57111113	57111410	953	0.37273	0.000410203	0.00398516	10693	57110409	57110525	2	-1.83552	0.0651557	0.242048	27	57110196	57110294	13	0.472303	0.52017	0.79316	35	ENSG00000166888	-	STAT6	2795.38	0.561581
chr12	57230019	57231768	57230019	57230164	57231748	57231768	57229924	57230035	27	-1.53303	0.00167976	0.0135493	111	57230128	57230256	965	-0.507106	2.44753e-05	0.000326913	3798	57231718	57231898	18	-0.9039	0.150191	0.417712	62	57231724	57232000	50	-0.258594	0.388837	0.698339	241	ENSG00000182199	+	SHMT2	6001.29	-0.410514
chr12	57231748	57233997	57231748	57231768	57233875	57233997	57231718	57231898	18	-0.9039	0.150191	0.417712	62	57231724	57232000	50	-0.258594	0.388837	0.698339	241	57233765	57233885	5	-1.30175	0.177978	0.462366	25	57233991	57234085	16	-0.77614	0.36789	0.680575	30	ENSG00000182199	+	SHMT2	6001.29	-0.410514
chr12	58919524	58920703	58920550	58920703	58919524	58919614	58920642	58920750	4	0.225974	0.808896	0.937032	23	58920377	58920556	154	1.06121	3.21688e-13	1.35695e-11	1771	58919607	58919709	7	0.643922	0.402736	0.709918	35	58919435	58919535	15	1.27266	0.043762	0.182969	52	ENSG00000139263	-	LRIG3	304.718	-1.1457
chr12	62602727	62603768	62602727	62602849	62603747	62603768	62602640	62602745	9	-1.15116	0.139675	0.400014	38	62602810	62602944	635	-0.219807	0.195069	0.488077	2519	62603644	62603748	3	-0.767305	0.399214	0.706669	25	62603544	62603911	33	1.19781	2.61836e-07	5.15564e-06	485	ENSG00000257354	+	ENSG00000257354	8.00459	0.483242
chr12	64404247	64405148	64404247	64404551	64405036	64405148	64404137	64404260	5	-0.362783	0.62013	0.853147	37	64404320	64404691	2376	-0.68381	1.32167e-08	3.20722e-07	37643	64404960	64405059	4	-1.94101	0.0758716	0.268717	24	64405068	64405184	3	-1.70275	0.107933	0.339485	26	ENSG00000184575	+	XPOT	3690.44	-0.231746
chr12	65824284	65824841	65824284	65824482	65824684	65824841	65823993	65824315	48	-0.167531	0.608386	0.846441	250	65824438	65824610	1649	0.18592	0.0920009	0.306006	6618	65824461	65824716	39	0.40071	0.328445	0.643744	133	65824789	65824940	993	0.734363	7.18471e-10	2.06066e-08	7864	ENSG00000149948	+	HMGA2	6970.17	0.338601
chr12	65824975	65827000	65824975	65825098	65826973	65827000	65824818	65825005	5	0.384753	0.353997	0.66804	122	65825057	65825195	6530	1.75467	3.58634e-70	9.86201e-68	20136	65826856	65827024	672	0.284648	0.0273486	0.129384	2704	65826873	65827006	6	0.384602	0.50963	0.785932	62	ENSG00000149948	+	HMGA2	6970.17	0.338601
chr12	70243359	70243753	70243359	70243432	70243658	70243753	70243240	70243391	60	-0.630763	0.00295388	0.0217873	594	70243399	70243521	81	-0.105555	0.65122	0.868651	438	70243539	70243685	17	0.0371941	0.930836	0.97917	122	70243714	70243845	29	1.5339	0.000180167	0.00194903	125	ENSG00000111596	+	CNOT2	1183.22	-0.244986
chr12	71686024	71686530	71686024	71686092	71686432	71686530	71685937	71686075	62	0.0963223	0.794003	0.931569	232	71686077	71686195	800	-0.275955	0.0231377	0.113944	3352	71686219	71686441	4	-2.5627	0.0142436	0.0780922	36	71686365	71686669	143	-1.12109	1.23328e-12	4.88476e-11	1345	ENSG00000139291	+	TMEM19	566.281	-0.716346
chr12	79690033	79690672	79690536	79690672	79690033	79690132	79690634	79690793	43	0.0609723	0.843802	0.949569	232	79690218	79690577	6698	0.377417	0.000720216	0.00651713	31237	79690132	79690230	4	0.553725	0.525231	0.796752	28	79689883	79690087	201	0.26583	0.0660334	0.2442	1978	ENSG00000177425	-	PAWR	982.943	-0.068833
chr12	89524789	89525611	89524789	89524868	89525429	89525611	89524662	89524805	111	1.12736	1.35108e-12	5.31921e-11	1308	89524862	89524989	122	-0.279607	0.376496	0.687981	217	89525212	89525462	101	0.500346	0.0286433	0.133917	459	89525579	89525736	18	0.45767	0.192088	0.483355	220	ENSG00000270344	+	POC1B-AS1	21.5232	0.390767
chr12	92144202	92146161	92145848	92146161	92144202	92144282	92146154	92146288	20	0.000571985	0.99894	0.999648	124	92145753	92145860	4640	0.305588	0.0054263	0.0359592	25669	92144283	92144388	2	2.33062	0.0722016	NA	14	92144113	92144203	6	-0.871826	0.285199	0.598902	38	ENSG00000133639	-	BTG1	985.917	1.21877
chr12	93570960	93571290	93570960	93571011	93571226	93571290	93570824	93570989	42	-0.0156287	0.960795	0.988313	236	93570958	93571148	201	-0.0199809	0.880677	0.962897	2945	93571133	93571238	15	0.247364	0.657973	0.871713	65	93571249	93571417	9	-0.463915	0.272802	0.585848	121	ENSG00000120833	+	SOCS2	47.4821	0.237443
chr12	93571226	93571889	93571767	93571889	93571226	93571290	93571534	93572035	62	-0.428036	0.0131461	0.0734271	968	93571651	93571778	443	-0.154273	0.329485	0.644585	1202	93571249	93571417	9	-0.463915	0.272802	0.585848	121	93571133	93571238	15	0.247364	0.657973	0.871713	65	ENSG00000246985	-	SOCS2-AS1	0.108068	0.920965
chr12	96399516	96400658	96400561	96400658	96399516	96399706	96400641	96400753	5	-2.7296	0.00421937	0.0291647	39	96400317	96400595	1319	-0.424676	1.85042e-05	0.000254083	12926	96399624	96399710	6	-0.655819	0.316301	0.631939	49	96399377	96399553	16	-0.432752	0.159498	0.43355	238	ENSG00000059758	-	CDK17	590.363	0.128721
chr12	103965706	103966207	103965706	103965871	103966141	103966207	103965572	103965735	281	-0.110223	0.551449	0.81346	856	103965835	103966043	1095	0.117438	0.27667	0.590019	10629	103966018	103966150	5	0.731647	0.323719	0.639462	36	103966189	103966297	11	-0.726613	0.349452	0.663617	38	ENSG00000139372	+	TDG	603.25	-0.387569
chr12	110281033	110281709	110281033	110281246	110281680	110281709	110280942	110281073	25	-1.00404	0.0196134	0.100077	130	110281230	110281398	6487	0.344137	0.00166866	0.0134793	42588	110281570	110281715	16	0.844132	0.0303634	0.139925	205	110281650	110281853	217	-0.0845323	0.507297	0.784345	2741	ENSG00000174437	+	ATP2A2	8470.9	-0.110071
chr12	111598688	111599601	111599560	111599601	111598688	111598756	111599385	111599852	11	-0.907537	0.00752923	0.0469946	209	111599437	111599608	29	0.0323102	0.911959	0.973305	282	111598746	111598852	6	-0.613512	0.352394	0.666472	48	111598570	111598696	4	-0.200009	0.767854	0.921014	46	ENSG00000204842	-	ATXN2	1405.81	-0.186175
chr12	113184728	113185720	113185474	113185720	113184728	113185074	113185524	113185864	572	0.0802908	0.543148	0.80855	5441	113185363	113185488	1598	-0.581321	2.22156e-08	5.21698e-07	9608	113185042	113185175	12	-1.02585	0.0664101	0.245165	73	113184641	113184731	6	0.212108	0.851439	NA	15	ENSG00000123064	-	DDX54	4725.82	-0.263995
chr12	120199206	120201310	120201106	120201310	120199206	120199327	120201298	120201434	80	-0.723954	0.00029229	0.00296893	737	120201014	120201137	2689	0.0971922	0.489071	0.772484	5860	120199314	120199427	5	0.783142	0.238563	0.545124	47	120199116	120199207	3	0.648136	0.524767	NA	18	ENSG00000089157	-	RPLP0	20623.9	0.112377
chr12	121580467	121581088	121581004	121581088	121580467	121580510	121581075	121581208	12	-0.75525	0.149815	0.417051	80	121580879	121581035	77	-1.36739	9.1366e-08	1.94236e-06	451	121580499	121580606	8	-0.0078383	0.988892	0.996805	64	121580392	121580522	19	-0.468827	0.370703	0.683229	80	ENSG00000089094	-	KDM2B	1297.99	-0.317936
chr12	121801019	121803090	121802944	121803090	121801019	121801077	121803069	121803209	65	-1.43022	0.000452645	0.00434417	151	121802852	121802954	159	-0.1515	0.554377	0.815425	344	121801077	121801174	6	0.0082365	0.991509	0.997791	32	121800926	121801030	13	0.367803	0.535971	0.804113	59	ENSG00000139725	-	RHOF	2324.28	0.284936
chr12	122980616	122980908	122980616	122980710	122980870	122980908	122980482	122980683	35	1.0681	0.000518917	0.00488967	233	122980669	122980813	3039	-0.188026	0.0872845	0.295415	13110	122980779	122980879	13	1.11734	0.205891	0.502962	27	122980886	122981053	285	0.607603	4.96388e-05	0.000617353	1875	ENSG00000182196	+	ARL6IP4	9.92615	-0.0771272
chr12	122980870	122981964	122980870	122980908	122981821	122981964	122980779	122980879	13	1.11734	0.205891	0.502962	27	122980886	122981053	285	0.607603	4.96388e-05	0.000617353	1875	122981576	122981869	24	0.46795	0.108223	0.340176	330	122981949	122982079	5	-0.190818	0.781847	0.927009	45	ENSG00000182196	+	ARL6IP4	9.92615	-0.0771272
chr13	21603849	21604269	21604169	21604269	21603849	21603915	21604260	21604360	14	-0.848475	0.270794	0.583456	41	21604059	21604183	5690	0.183833	0.0608298	0.230598	20382	21603903	21604014	14	-0.119046	0.864123	0.957556	43	21603735	21603879	9	0.881992	0.090676	0.303012	81	ENSG00000165487	-	MICU2	643.015	-0.155841
chr13	23888785	23889585	23889399	23889585	23888785	23888867	23889553	23889707	29	0.704581	0.0346738	0.154292	190	23889247	23889460	728	-0.372292	0.000902072	0.00793725	4631	23888829	23888985	67	-1.25422	4.11177e-05	0.000521367	266	23888698	23888788	8	0.232755	0.789053	0.9298	28	ENSG00000027001	-	MIPEP	590.879	-0.0240205
chr13	27450149	27450642	27450584	27450642	27450149	27450255	27450643	27450780	17	-0.55017	0.405247	0.711681	51	27450289	27450627	198	0.460293	0.00146222	0.0120522	1533	27450208	27450347	39	0.0997078	0.788299	0.929429	157	27449895	27450201	184	0.696693	3.43797e-08	7.83103e-07	2883	ENSG00000122033	-	MTIF3	318.535	0.33129
chr13	36346080	36346450	36346359	36346450	36346080	36346121	36346447	36346539	7	1.70572	0.07056	0.255575	25	36346229	36346525	842	0.512168	1.06651e-05	0.00015411	11033	36346111	36346174	3	-0.265933	0.817649	NA	15	36345999	36346092	4	1.0072	0.270845	0.583478	23	ENSG00000133104	-	SPART	988.684	-0.0295718
chr13	44435171	44437002	44436853	44437002	44435171	44435462	44436998	44437096	6	-0.875036	0.416045	0.720272	24	44436755	44436868	5803	0.883011	1.33224e-19	9.02954e-18	25717	44435436	44435607	10	0.10833	0.826664	0.94391	91	44435086	44435182	14	0.340506	0.59119	0.836429	52	ENSG00000102804	-	TSC22D1	2446.83	-0.136736
[truncated: 553 more rows]

## Sheet: SuperPromoters_core_U2OS
chr	super-Promoter_start	super-Promoter_end	sub-promoter#1_start	sub-promoter#1_end	sub-promoter#2_start	sub-promoter#2_end	peak#1_start	peak#1_end	CTSS#1	peak#1_l2fc	peak#1_pval	peak#1_adj_pval	peak#1_readcount	peak#2_start	peak#2_end	CTSS#2	peak#2_l2fc	peak#2_pval	peak#2_adj_pval	peak#2_readcount	peak#3_start	peak#3_end	CTSS#3	peak#3_2fc	peak#3_pval	peak#3_adj_pval	peak#3_readcount	peak#4_start	peak#4_end	CTSS#4	peak#4_l2fc	peak#4_pval	peak#4_adj_pval	peak#4_readcount	host_gene	orientation	hgnc	host_gene_baseMean	host_gene_lfc
[truncated: 1,452 more rows]

[truncated: 1 more sheets: SuperPromoters_core_joint]
