# Supplementary material for: Super-promoters: Cooperativity between juxtaposed promoters
Source: Research Square preprint supplement (doi:10.21203/rs.3.rs-2803901/v1), 2023-05-25
Supplement: Supplementary file 2 [file 47aa7e2723389b5325cad614.xlsx]

## Sheet: SuperPromoters_extended_MCF7
chr	super-Promoter_start	super-Promoter_end	peak#1_start	peak#1_end	hostTSS	peak#1_l2fc	peak#1_pval	peak#1_adj_pval	peak#1_readcount	peak#2_start	peak#2_end	daTSS	peak#2_l2fc	peak#2_pval	peak#2_adj_pval	peak#2_readcount	host_gene	orientation	hgnc	host_gene_baseMean	host_gene_lfc
chr1	633558	634047	633555	633607	40	0.898348	0.0359021	0.0957723	97	634000	634076	126	0.671446	0.00624778	0.021744	381	ENSG00000248527	+	MTATP6P1	21695.7	0.382607
chr1	827299	827531	827392	827539	87	1.34394	1.0018e-09	1.07897e-08	380	827294	827352	14	0.766576	0.219894	0.388427	41	ENSG00000225880	-	LINC00115	65.9204	1.73375
chr1	923922	924549	923920	923972	189	-0.98803	3.69545e-05	0.000213416	362	924501	924554	6	-0.0234965	0.976057	0.987243	30	ENSG00000187634	+	SAMD11	1008.56	-0.965285
chr1	924891	925603	924876	924943	30	0.64044	0.160849	0.310029	78	925556	925622	326	0.194375	0.221553	0.390485	1114	ENSG00000187634	+	SAMD11	1008.56	-0.965285
chr1	940358	941677	940329	940435	68	-1.72502	2.97789e-07	2.40025e-06	205	941630	941690	7	-2.22676	0.004978	0.0178314	44	ENSG00000187634	+	SAMD11	1008.56	-0.965285
chr1	942112	944385	942110	942166	13	-1.96538	0.00434421	0.0158403	49	944338	944402	3	-0.880629	0.467849	0.647555	14	ENSG00000187634	+	SAMD11	1008.56	-0.965285
chr1	958243	959255	959204	959291	2302	-0.105892	0.231919	0.403166	13012	958237	958283	4	0.363978	0.742629	0.855146	14	ENSG00000188976	-	NOC2L	6632.31	-0.145713
chr1	960583	960801	960570	960709	106	0.0609989	0.674395	0.810083	960	960763	960813	8	-1.50655	0.125181	0.256702	24	ENSG00000187961	+	KLHL17	1303.33	-0.104856
chr1	966517	966977	966490	966569	140	0.277863	0.0333826	0.0902502	1292	966926	966997	105	1.1999	8.02068e-06	5.21526e-05	280	ENSG00000187583	+	PLEKHN1	733.041	0.128785
chr1	1000510	1001945	1000484	1000563	261	-0.226234	0.202445	0.366276	678	1001893	1001966	16	1.7169	6.99671e-05	0.000384974	100	ENSG00000187608	+	ISG15	3308.49	0.698652
chr1	1012546	1013383	1013303	1013387	3	0.327017	0.579872	0.740441	45	1012536	1012586	4	2.57179	0.00816917	0.0274168	22	ENSG00000224969	-	ENSG00000224969	12.185	3.31576
chr1	1020119	1021237	1020096	1020173	22224	1.42197	9.71786e-78	1.29576e-75	41529	1021188	1021240	22	1.70764	0.000938785	0.00406792	75	ENSG00000188157	+	AGRN	41204.9	1.34701
chr1	1074102	1074306	1074140	1074311	3652	-0.511015	3.7387e-08	3.36694e-07	7896	1074009	1074152	34	1.45495	9.71741e-05	0.000519261	123	ENSG00000237330	-	RNF223	1908.48	-0.534987
chr1	1272771	1273832	1273774	1273862	4114	0.307655	0.000135898	0.000704713	17907	1272710	1272911	142	1.14527	4.68531e-09	4.70792e-08	559	ENSG00000160087	-	UBE2J2	2723.39	0.190123
chr1	1307793	1307929	1307852	1308134	943	0.580525	4.67439e-09	4.6975e-08	4778	1307781	1307832	5	1.60244	0.0642747	0.153169	23	ENSG00000131584	-	ACAP3	7058.41	0.644621
chr1	1308596	1309829	1308592	1308762	545	0.0363359	0.715254	0.837868	3264	1309756	1309853	138	0.118922	0.512401	0.687451	590	ENSG00000169972	+	PUSL1	1143.53	-0.10967
chr1	1317381	1319469	1319325	1319471	19	0.594634	0.199122	0.36192	82	1317378	1317432	17	0.773837	0.133373	0.269269	66	ENSG00000127054	-	INTS11	3780.91	0.480423
chr1	1348602	1349379	1349247	1349436	682	0.11262	0.668245	0.805963	3584	1348597	1348677	17	0.450401	0.381442	0.567864	72	ENSG00000107404	-	DVL1	3035.08	-0.181729
chr1	1406568	1407246	1407166	1407265	6977	-0.201859	0.0217433	0.0631164	22532	1406418	1406639	112	-1.47899	2.71985e-21	6.45495e-20	1185	ENSG00000242485	-	MRPL20	2664.78	-0.38837
chr1	1433388	1435605	1435557	1435608	3	-1.19328	0.133101	0.268856	32	1433381	1433431	5	-0.684372	0.447615	0.629223	22	ENSG00000225285	-	LINC01770	8.29999	-1.00628
chr1	1471777	1472128	1471751	1471817	512	-0.27497	0.013406	0.0420096	2884	1472107	1472132	5	1.73991	0.12904	0.262507	14	ENSG00000160072	+	ATAD3B	2113.99	-0.265828
chr1	1573962	1574625	1574549	1574648	1272	0.205632	0.0416254	0.108142	10394	1573960	1574012	8	1.45953	0.102461	0.220606	21	ENSG00000160075	-	SSU72	4443.49	0.15959
chr1	1574762	1574862	1574789	1574891	7276	0.363949	4.68053e-06	3.16235e-05	30381	1574742	1574813	12	2.72778	0.000114555	0.000603817	47	ENSG00000160075	-	SSU72	4443.49	0.15959
chr1	1599825	1600134	1599971	1600172	311	-1.27426	7.73197e-19	1.6147e-17	2124	1599800	1599876	7	1.52864	0.00378724	0.0140543	60	ENSG00000228594	-	FNDC10	1782.08	-1.45437
chr1	1615515	1615796	1615415	1615591	262	1.61892	1.72062e-35	7.52871e-34	1560	1615723	1615808	69	0.468715	0.0243387	0.069449	420	ENSG00000197530	+	MIB2	3119.14	1.46043
chr1	1615864	1616170	1615841	1615935	330	2.14109	7.12578e-56	5.54172e-54	1371	1616078	1616176	167	1.77272	1.44083e-14	2.30904e-13	375	ENSG00000197530	+	MIB2	3119.14	1.46043
chr1	1692534	1692794	1692743	1692825	114	1.25228	1.74002e-09	1.83159e-08	419	1692526	1692583	26	0.961758	0.0556453	0.136829	70	ENSG00000189339	-	SLC35E2B	3126.46	0.795433
chr1	1745809	1746069	1746018	1746100	153	0.877629	2.80609e-07	2.26935e-06	698	1745801	1745859	36	2.14653	0.000104293	0.000554392	75	ENSG00000215790	-	SLC35E2A	228.494	1.17934
chr1	1754099	1756255	1756210	1756258	10	-1.94798	0.165784	0.317097	12	1754096	1754152	4	0.389076	0.655882	0.79698	22	ENSG00000008130	-	NADK	5346.31	0.514968
chr1	1777726	1778469	1778370	1778542	1237	0.190672	0.0394908	0.103612	10562	1777727	1777779	6	1.64626	0.0274242	0.0766872	30	ENSG00000008130	-	NADK	5346.31	0.514968
chr1	1778516	1778811	1778768	1778850	196	-0.223614	0.169084	0.321734	858	1778508	1778561	5	-1.31751	0.180612	0.33704	21	ENSG00000008130	-	NADK	5346.31	0.514968
chr1	1778967	1780464	1780415	1780470	5	3.50977	0.000726394	0.00322886	28	1778962	1779028	37	1.26247	0.0059675	0.0208985	79	ENSG00000008130	-	NADK	5346.31	0.514968
chr1	1891196	1891753	1891164	1891253	25	0.831891	0.012377	0.0391883	147	1891706	1891766	17	0.064862	0.919457	0.959232	50	ENSG00000231050	+	ENSG00000231050	9.41623	1.25959
chr1	2412338	2412542	2412488	2412579	235	-0.432174	0.000111152	0.00058738	2185	2412326	2412386	5	-1.5386	0.0299715	0.0825465	43	ENSG00000157911	-	PEX10	1144.7	-0.597576
chr1	2412790	2413810	2413764	2413838	16	-4.09149	1.01841e-05	6.49903e-05	70	2412762	2412851	31	-1.15407	8.3515e-05	0.000452044	269	ENSG00000157911	-	PEX10	1144.7	-0.597576
chr1	2525726	2526595	2526543	2526610	1309	0.0681689	0.502111	0.678779	3485	2525724	2525776	18	3.86208	5.02435e-06	3.37737e-05	48	ENSG00000157881	-	PANK4	1185.07	0.16621
chr1	2546399	2546848	2546391	2546450	968	1.59748	1.17854e-32	4.66648e-31	1311	2546796	2546857	3	0.948014	0.268438	0.447323	25	ENSG00000272449	+	ENSG00000272449	562.894	1.29385
chr1	2591026	2592844	2592808	2592896	341	-0.753643	7.73525e-08	6.68822e-07	1479	2591026	2591074	20	-1.20128	0.0994955	0.215743	36	ENSG00000142606	-	MMEL1	175.829	-1.11411
chr1	3069202	3070378	3069161	3069254	65	-2.45201	1.3753e-14	2.20696e-13	288	3070334	3070404	9	-1.67101	0.0138762	0.043239	47	ENSG00000142611	+	PRDM16	132.647	-2.26674
chr1	3454664	3456857	3454560	3454738	822	-0.952609	2.89922e-24	8.00158e-23	4402	3456811	3456859	8	-0.655323	0.565138	0.729137	15	ENSG00000130762	+	ARHGEF16	2273.04	-0.853216
chr1	3625033	3625689	3625011	3625114	852	0.679788	1.37073e-12	1.90491e-11	7411	3625610	3625735	17	2.4219	1.06927e-06	7.96542e-06	86	ENSG00000158109	+	TPRG1L	2414.3	0.777996
chr1	3857460	3857718	3857455	3857533	62	-0.836572	2.46995e-05	0.000147156	493	3857668	3857723	6	0.835763	0.295491	0.477758	26	ENSG00000169598	+	DFFB	263.69	-0.754293
chr1	3900405	3901356	3900346	3900464	41	2.03489	3.33713e-09	3.40998e-08	160	3901272	3901361	8	-0.90474	0.0955668	0.20915	67	ENSG00000236423	+	LINC01134	47.4658	2.56456
chr1	6179256	6180310	6180258	6180341	74	0.59695	0.00194593	0.0078055	499	6179255	6179281	10	0.0624142	0.936518	0.967428	27	ENSG00000116254	-	CHD5	930.286	0.864958
chr1	6235481	6235931	6235879	6236032	943	-0.610107	1.52346e-12	2.10781e-11	5359	6235475	6235534	14	0.0621074	0.91624	0.9574	48	ENSG00000116237	-	ICMT	4994.55	-0.781554
chr1	6393561	6393766	6393630	6393770	424	0.861134	3.40662e-10	3.83566e-09	1312	6393532	6393614	29	0.666904	0.0626727	0.150177	126	ENSG00000097021	-	ACOT7	2577.8	-0.02689
chr1	6601301	6602868	6602819	6602882	557	0.846423	1.72948e-07	1.43674e-06	721	6601297	6601353	15	5.61497	4.88444e-07	3.81971e-06	46	ENSG00000162413	-	KLHL21	1916.54	0.540069
chr1	8878888	8879254	8879184	8879292	66	0.602274	0.00152442	0.00628411	498	8878798	8878998	60	1.27873	2.25954e-12	3.08633e-11	585	ENSG00000074800	-	ENO1	66623.4	0.154627
chr1	9181549	9182102	9181460	9181624	60	4.87404	4.43263e-24	1.21268e-22	254	9182050	9182116	709	5.31789	2.5331e-84	3.75024e-82	1055	ENSG00000234546	+	LNCTAM34A	794.751	4.48438
chr1	9182213	9182296	9182226	9182399	793	2.33345	2.27913e-88	3.62841e-86	3801	9182203	9182301	460	5.15814	1.69295e-211	1.96049e-208	3179	ENSG00000228526	-	MIR34AHG	2293.14	3.32189
chr1	9588910	9589048	9588889	9588971	354	-2.14892	1.71765e-39	8.55144e-38	1332	9589005	9589051	4	-1.3114	0.284465	0.465073	13	ENSG00000188807	+	TMEM201	1144.25	-1.02816
chr1	9909407	9910247	9910098	9910363	2274	0.81754	3.38777e-21	7.99298e-20	11489	9909402	9909468	14	4.41482	2.87746e-06	2.01015e-05	51	ENSG00000178585	-	CTNNBIP1	2084.34	0.566028
chr1	10430442	10430668	10430619	10430688	12	-1.61762	0.00428842	0.0156626	66	10430422	10430521	358	-2.06295	3.38158e-74	4.2039e-72	2907	ENSG00000271989	-	ENSG00000271989	6.40009	-0.411215
chr1	10794857	10796618	10796549	10796717	163	0.960174	7.25832e-11	8.7034e-10	969	10794844	10794904	4	4.94156	8.04666e-05	0.000437111	17	ENSG00000130940	-	CASZ1	3015.39	1.67264
chr1	11012658	11013049	11012645	11012736	6278	0.292693	0.000297436	0.0014368	23929	11013015	11013095	21	0.89583	0.00861733	0.0287163	137	ENSG00000120948	+	TARDBP	6501.97	0.368062
chr1	11099429	11099850	11099784	11099875	1426	-0.52496	8.85867e-10	9.58869e-09	6285	11099413	11099519	57	0.0170147	0.942731	0.970952	320	ENSG00000171824	-	EXOSC10	2107.81	-0.59422
chr1	11273225	11273431	11273192	11273329	207	-0.476627	0.00154736	0.00636942	907	11273385	11273436	11	1.64729	0.0814664	0.184688	20	ENSG00000120942	+	UBIAD1	907.125	-0.614967
chr1	11691479	11691596	11691473	11691630	103	2.51311	7.84801e-54	5.87634e-52	990	11691475	11691528	7	4.68938	9.39607e-05	0.000503732	24	ENSG00000116670	-	MAD2L2	870.061	-0.765811
chr1	11736141	11736562	11736113	11736215	366	0.134376	0.223747	0.393196	2720	11736505	11736564	3	1.21052	0.183914	0.3414	19	ENSG00000177674	+	AGTRAP	720.864	0.0654255
chr1	11806240	11806361	11806138	11806301	216	-0.0861893	0.457697	0.638455	1749	11806329	11806377	3	1.65239	0.115655	0.242035	17	ENSG00000011021	+	CLCN6	696.449	0.0582371
chr1	11908151	11909928	11908147	11908200	5274	0.810013	5.20143e-14	8.0151e-13	6120	11909877	11909931	29	-1.88851	0.00111286	0.00474439	71	ENSG00000285646	+	ENSG00000285646	61.0574	0.378494
chr1	11980443	11981792	11980429	11980495	757	-0.734684	2.06414e-08	1.9171e-07	1721	11981713	11981797	8	4.85905	4.49302e-05	0.000255856	28	ENSG00000116688	+	MFN2	4013.67	-0.153765
chr1	12230031	12231045	12230003	12230109	221	0.799046	1.28827e-10	1.51131e-09	1593	12231000	12231060	13	2.43232	3.80065e-05	0.000218968	61	ENSG00000048707	+	VPS13D	3406.65	0.973817
chr1	12616601	12617678	12617237	12617797	181	2.26336	2.53557e-65	2.48662e-63	1515	12616597	12616650	8	2.99175	0.00521773	0.0185755	21	ENSG00000162496	-	DHRS3	1400.63	2.61855
chr1	12618085	12618208	12618068	12618338	418	2.51986	2.04563e-79	2.76687e-77	2263	12618080	12618137	7	2.18647	0.00302518	0.011542	35	ENSG00000162496	-	DHRS3	1400.63	2.61855
chr1	12619200	12619971	12619926	12619997	35	3.94326	2.83955e-12	3.84625e-11	114	12619196	12619248	6	5.09919	0.0264052	0.0742776	21	ENSG00000272482	-	ENSG00000272482	51.2224	4.61856
chr1	13700193	13700275	13700178	13700412	237	-0.623224	2.37155e-05	0.000141743	1037	13700147	13700279	24	-0.560651	0.277667	0.457444	66	ENSG00000116731	+	PRDM2	2381.59	0.379261
chr1	13749414	13749660	13749411	13749488	919	0.509465	8.96278e-07	6.75111e-06	4948	13749638	13749663	7	-0.979563	0.442753	0.624945	11	ENSG00000116731	+	PRDM2	2381.59	0.379261
chr1	15152565	15153611	15152541	15152664	51	-0.928502	0.00953496	0.0313332	155	15153566	15153640	6	-0.182281	0.777865	0.877962	42	ENSG00000171729	+	TMEM51	456.348	-0.479134
chr1	15584545	15585022	15584844	15585111	214	-1.56763	6.1881e-19	1.29967e-17	837	15584532	15584596	2	-0.687801	0.558636	0.72454	13	ENSG00000116771	-	AGMAT	365.483	-1.55113
chr1	15758794	15759165	15758730	15758832	105	0.227248	0.165178	0.316203	799	15759115	15759167	25	2.58704	0.00120967	0.00510947	34	ENSG00000162458	+	FBLIM1	555.485	0.273803
chr1	15836100	15836335	15836064	15836172	193	-0.479706	0.00103504	0.00444221	988	15836285	15836410	6	1.05149	0.0581123	0.141557	56	ENSG00000065526	+	SPEN	5746.25	0.442045
chr1	15847821	15848605	15847570	15847890	544	0.41992	1.84608e-06	1.32716e-05	7987	15848552	15848612	24	2.33486	0.000156131	0.000798858	52	ENSG00000065526	+	SPEN	5746.25	0.442045
chr1	16155214	16156068	16155993	16156081	1964	1.55105	1.89948e-66	1.92536e-64	4534	16155124	16155278	149	2.46253	4.51924e-42	2.43492e-40	711	ENSG00000142627	-	EPHA2	4487.22	1.62511
chr1	16206757	16207022	16206947	16207047	30	-0.419175	0.143853	0.285083	214	16206754	16206818	17	1.40688	0.00639169	0.0221841	65	ENSG00000142632	-	ARHGEF19	671.305	-2.34086
chr1	16608622	16609143	16609096	16609147	4	-0.309332	0.790415	0.885369	13	16608503	16608685	610	3.06122	7.89143e-125	2.39968e-122	2393	ENSG00000219481	-	NBPF1	7258.85	0.205753
chr1	16612794	16613549	16613482	16613579	1802	0.0748424	0.301627	0.484806	15608	16612715	16612873	20	1.87202	1.20275e-07	1.01869e-06	151	ENSG00000219481	-	NBPF1	7258.85	0.205753
chr1	17437997	17438535	17438383	17438654	7679	0.163358	0.0693697	0.162579	15718	17437984	17438054	10	0.689648	0.219736	0.388269	62	ENSG00000179051	-	RCC2	15061.3	0.702989
chr1	17539726	17540498	17539685	17539954	133	0.336306	0.00314725	0.0119559	1819	17540450	17540505	38	-0.0829389	0.860371	0.926298	74	ENSG00000074964	+	ARHGEF10L	2221.46	0.889394
chr1	19596989	19597525	19596974	19597069	7499	-0.308771	0.000677219	0.00303388	53627	19597475	19597526	5	3.64777	0.0171344	0.051711	7	ENSG00000173436	+	MICOS10	391.384	-0.262955
chr1	20486056	20486209	20486162	20486230	129	-1.10513	9.24316e-08	7.92796e-07	543	20486053	20486106	6	1.08583	0.245534	0.420036	18	ENSG00000162545	-	CAMK2N1	1884.19	-0.1418
chr1	20507863	20508150	20508066	20508157	390	0.194298	0.0605329	0.146135	3506	20507859	20507916	14	1.15038	0.0662853	0.156877	40	ENSG00000090432	-	MUL1	1155.74	0.148138
chr1	20633477	20633946	20633453	20633542	2950	0.563788	1.95566e-08	1.82074e-07	7489	20633898	20633951	3	2.26169	0.0129425	0.0407548	23	ENSG00000158828	+	PINK1	1704.85	0.669421
chr1	20650483	20652330	20652181	20652337	72	-0.00259876	0.993172	0.996555	196	20650483	20650531	13	0.547595	0.570894	0.733775	17	ENSG00000117242	-	PINK1-AS	481.069	0.446383
chr1	20786915	20787306	20787244	20787330	3170	-0.466019	1.81864e-06	1.30899e-05	15316	20786832	20786973	8	0.711405	0.141825	0.282108	72	ENSG00000127483	-	HP1BP3	5323.26	-0.804126
chr1	21176231	21176892	21176831	21176912	1083	0.0750296	0.416584	0.602473	6050	21176173	21176278	11	0.121657	0.860371	0.926298	36	ENSG00000075151	-	EIF4G3	4880.85	-0.0528419
chr1	21783263	21783619	21783556	21783620	4	0.45514	0.522641	0.695678	34	21783242	21783326	12	0.663018	0.0600101	0.14515	149	ENSG00000090686	-	USP48	2808.68	0.102756
chr1	22052670	22053223	22052603	22052750	1638	0.741287	9.67501e-16	1.67668e-14	10153	22053173	22053229	79	3.46521	3.50328e-15	5.85283e-14	156	ENSG00000070831	+	CDC42	5900.51	1.01821
chr1	22142379	22143096	22143046	22143127	118	0.872603	0.00322382	0.0122073	195	22142379	22142407	261	0.446971	0.132411	0.267806	273	ENSG00000162552	-	WNT4	126.212	0.743135
chr1	23343832	23344316	23344251	23344348	1530	0.0564628	0.515651	0.690335	17764	23343797	23343869	12	0.141192	0.795244	0.888084	58	ENSG00000125944	-	HNRNPR	7138.1	-0.202511
chr1	23558369	23559498	23559448	23559508	22902	2.15889	3.65463e-160	1.95536e-157	59619	23558366	23558420	17	1.09659	0.078604	0.179635	44	ENSG00000117318	-	ID3	6039.91	2.15006
chr1	23591719	23593694	23593642	23593701	6	5.53106	7.72755e-07	5.86949e-06	44	23591714	23591767	28	5.5065	9.5831e-07	7.18444e-06	42	ENSG00000285802	-	ENSG00000285802	37.0484	4.61879
chr1	23743154	23743395	23743151	23743202	55	-0.387841	0.445823	0.627685	68	23743344	23743401	3	0.0509576	0.948524	0.973821	30	ENSG00000011007	+	ELOA	3000.35	-0.499606
chr1	23959286	23959642	23959102	23959338	153	-1.46109	5.77275e-14	8.86637e-13	635	23959593	23959678	320	0.596725	0.00371574	0.0138212	573	ENSG00000189266	+	PNRC2	4528.18	0.810206
chr1	24413543	24413742	24413675	24413762	38	-1.77176	5.98832e-10	6.59932e-09	282	24413523	24413597	5	-1.97722	0.0149202	0.0459823	38	ENSG00000001460	-	STPG1	106.866	-0.730692
chr1	25232134	25232501	25232432	25232508	8815	0.953793	4.38064e-35	1.8952e-33	23842	25232127	25232182	7	2.50761	0.0107216	0.0346256	21	ENSG00000117614	-	SYF2	1799.48	0.756314
chr1	25819977	25820796	25819948	25820037	321	0.722072	1.60017e-09	1.68984e-08	1527	25820744	25820813	15	1.5148	0.00204362	0.00815441	69	ENSG00000117640	+	MTFR1L	1171.25	0.891216
chr1	26111045	26111668	26111022	26111233	46	-0.714573	0.00138104	0.00575138	398	26111603	26111757	31	1.77335	3.35318e-09	3.42514e-08	211	ENSG00000175087	+	PDIK1L	676.62	-0.538249
chr1	26111827	26112160	26111797	26111902	254	-0.530423	0.000180059	0.000909232	1155	26112115	26112167	4	0.309527	0.609175	0.762266	46	ENSG00000175087	+	PDIK1L	676.62	-0.538249
chr1	26472514	26472878	26472433	26472566	19512	-1.15695	3.16457e-35	1.37472e-33	38313	26472827	26472883	3	-0.6159	0.474404	0.653823	24	ENSG00000198830	+	HMGN2	9075.07	-1.29487
chr1	26696031	26696706	26696013	26696442	1414	0.137064	0.146562	0.289089	5389	26696660	26696723	4	1.85554	0.0265237	0.0745762	26	ENSG00000117713	+	ARID1A	5140.66	0.333444
chr1	26900197	26900452	26900404	26900470	72	0.710961	0.000340067	0.00162152	459	26900160	26900257	40	0.972398	0.000306287	0.00147551	233	ENSG00000198746	-	GPATCH3	557.352	0.63429
chr1	27349527	27349959	27349330	27349607	41	-0.361404	0.089256	0.198243	395	27349913	27349961	9	-1.38749	0.0349073	0.093582	49	ENSG00000142765	+	SYTL1	8438.16	2.83723
chr1	27602059	27604143	27604088	27604163	3007	1.81801	1.06218e-89	1.72347e-87	6009	27602060	27602108	5	3.67797	0.00679832	0.0234219	13	ENSG00000126705	-	AHDC1	3742.94	1.72144
chr1	28236153	28236482	28236118	28236206	44915	0.272641	0.00151237	0.00624053	170902	28236384	28236515	6	-0.68465	0.261069	0.438893	49	ENSG00000130770	+	ATP5IF1	4415.94	-0.025165
chr1	28246571	28247213	28246570	28246629	8	4.27115	8.14123e-06	5.28633e-05	46	28247147	28247353	362	3.57781	6.02177e-104	1.26947e-101	2070	ENSG00000271398	+	ENSG00000271398	1.09667	3.74876
chr1	28259523	28260075	28259502	28259577	2235	3.32051	9.72216e-267	2.49052e-263	6966	28260030	28260082	18	5.30887	6.96309e-07	5.32843e-06	61	ENSG00000130766	+	SESN2	8816.14	3.42162
chr1	28668730	28669973	28668714	28668843	303	0.741946	2.56069e-08	2.35294e-07	1675	28669917	28669992	26	-1.25586	0.015649	0.0478595	81	ENSG00000162419	+	GMEB1	719.345	0.722198
chr1	28736623	28736673	28736598	28736671	11	-0.926441	0.1018	0.219472	61	28736640	28736693	6	-2.41555	0.00346231	0.0129855	40	ENSG00000198492	+	YTHDF2	3419.65	0.205816
chr1	28736950	28737666	28736788	28737103	1602	0.144672	0.1133	0.238258	8889	28737602	28737696	30	0.637664	0.0594294	0.144068	151	ENSG00000198492	+	YTHDF2	3419.65	0.205816
chr1	29181485	29181846	29181718	29182017	560	-0.630581	1.7444e-12	2.40483e-11	7641	29181482	29181552	10	0.0321013	0.953949	0.976473	59	ENSG00000116350	-	SRSF4	2623.98	-0.508341
chr1	29236521	29237509	29236496	29236593	3490	2.00397	8.55376e-119	2.40233e-116	5993	29237462	29237510	7	1.65519	0.0523566	0.13035	24	ENSG00000060656	+	PTPRU	4723.77	1.99189
chr1	30824265	30824472	30824235	30824319	79	3.11631	8.00011e-22	1.94842e-20	247	30824429	30824484	4	1.58678	0.0414441	0.107774	32	ENSG00000223382	+	LINC01778	34.1228	3.77017
chr1	30824668	30825768	30824661	30824728	22	1.66286	0.00426293	0.0155809	51	30825706	30825783	7	5.85191	1.02516e-07	8.74323e-07	54	ENSG00000223382	+	LINC01778	34.1228	3.77017
chr1	31413212	31413751	31413210	31413291	477	0.851411	1.00141e-12	1.40461e-11	2043	31413707	31413760	10	0.882953	0.0709979	0.165688	73	ENSG00000168528	+	SERINC2	842.707	1.21119
chr1	31937883	31938355	31938294	31938391	2908	-0.36732	7.11976e-06	4.67295e-05	20463	31937882	31937935	5	0.374301	0.648784	0.791937	24	ENSG00000184007	-	PTP4A2	3567.54	-0.480725
chr1	32817652	32818181	32817586	32817847	244	-0.828802	1.48638e-10	1.73324e-09	1544	32817993	32818186	23	-1.84762	4.84554e-05	0.000274325	114	ENSG00000116497	+	S100PBP	725.741	-1.14995
chr1	32893526	32895415	32893522	32893579	10	-1.75693	0.033563	0.0906335	33	32895340	32895417	34	-1.55129	0.002045	0.00815876	83	ENSG00000121905	+	HPCA	18.3273	0.138951
chr1	32964078	32964813	32964762	32964906	997	2.19568	1.77332e-101	3.56927e-99	2969	32964076	32964129	16	6.2185	4.01515e-08	3.60208e-07	41	ENSG00000116514	-	RNF19B	2149.17	2.40361
chr1	33181042	33182040	33181991	33182067	761	0.808924	6.57252e-16	1.15082e-14	3760	33181020	33181095	39	2.31032	4.80297e-15	7.94567e-14	263	ENSG00000116525	-	TRIM62	1318.5	0.838889
chr1	33256491	33256924	33256292	33256567	385	-1.04977	2.43717e-18	4.96097e-17	1853	33256857	33256937	17	1.11207	0.00716754	0.0245131	98	ENSG00000160094	+	ZNF362	1150.67	-0.0144999
chr1	34985036	34985324	34985256	34985348	514	-1.57344	1.77159e-27	5.63018e-26	1270	34985009	34985065	7	-1.25707	0.0601899	0.14549	46	ENSG00000284773	-	ENSG00000284773	8.13617	-0.422332
chr1	35031790	35031944	35031877	35031968	103	-0.541455	0.00489464	0.017564	601	35031789	35031839	4	0.174116	0.868438	0.93098	15	ENSG00000163867	-	ZMYM6	281.848	-0.281104
chr1	35192589	35193144	35193092	35193151	33584	-0.610551	5.56567e-13	7.97457e-12	47336	35192513	35192876	13	-0.8101	0.00184352	0.00743991	329	ENSG00000116560	-	SFPQ	15667	-0.58946
chr1	35557441	35557660	35557584	35557669	33	0.907939	0.000691007	0.00308829	244	35557415	35557568	11	0.467011	0.197309	0.35963	126	ENSG00000142687	-	KIAA0319L	2282.33	0.0370229
chr1	35769571	35769966	35769902	35770001	773	-2.59243	6.84462e-109	1.60727e-106	4425	35769561	35769645	37	-0.713691	0.102529	0.220724	92	ENSG00000092853	-	CLSPN	1650.28	-2.71722
chr1	35930896	35931046	35930863	35930962	87	0.426175	0.0296154	0.0817376	471	35931019	35931089	14	1.23408	0.00501272	0.0179451	96	ENSG00000126070	+	AGO3	826.573	0.241945
chr1	36385179	36385914	36385842	36385939	1251	1.03093	2.39432e-33	9.66141e-32	7169	36385178	36385228	18	2.75248	0.00122707	0.00517727	30	ENSG00000196182	-	STK40	2799.82	1.08277
chr1	37474579	37476739	37474515	37474632	954	0.584569	1.56852e-07	1.30998e-06	1839	37476695	37476743	8	2.10296	0.00813002	0.0273088	30	ENSG00000163874	+	ZC3H12A	729.686	0.32019
chr1	37690758	37692241	37692165	37692277	37	-1.17297	4.16353e-05	0.000238525	250	37690754	37690808	5	-1.65494	0.158922	0.307295	16	ENSG00000116922	-	C1orf109	727.995	-0.831215
chr1	37793846	37794046	37793814	37793923	141	-1.78922	1.31569e-21	3.17417e-20	758	37793998	37794056	4	0.00692234	0.993066	0.996512	30	ENSG00000185090	+	MANEAL	1606.82	-1.72216
chr1	37807793	37808177	37807774	37807870	1927	-0.212585	0.00919634	0.0303846	12086	37808113	37808217	1185	-0.330413	0.000489565	0.0022635	6049	ENSG00000197982	+	C1orf122	2091.08	-0.146173
chr1	38047160	38047992	38047113	38047211	76	7.80753	2.91334e-20	6.58156e-19	511	38047946	38047995	8	5.5156	3.54663e-06	2.44191e-05	25	ENSG00000224592	+	MIR3659HG	109.557	9.66513
chr1	38859208	38859748	38859575	38859776	396	0.304755	0.00127655	0.00536273	4916	38859187	38859330	88	1.36006	1.44427e-08	1.36431e-07	340	ENSG00000116954	-	RRAGC	546.199	0.433968
chr1	39026349	39026771	39026322	39026402	46061	0.0894008	0.269515	0.448516	101702	39026720	39026777	3	-0.0462233	0.968277	0.983955	12	ENSG00000168653	+	NDUFS5	3713.29	0.10445
chr1	39575801	39575845	39575798	39575849	9	-0.47481	0.59923	0.754896	20	39575768	39575809	5	0.52147	0.539641	0.709925	25	ENSG00000090621	-	PABPC4	7185.32	-0.0642809
chr1	39575944	39576789	39576738	39576899	4697	-0.171158	0.0580856	0.141516	10229	39575942	39575995	5	-0.378786	0.69459	0.824122	19	ENSG00000090621	-	PABPC4	7185.32	-0.0642809
chr1	39788588	39788854	39788791	39788871	35	-1.30777	0.000330418	0.00158049	153	39788586	39788620	7	0.930057	0.446838	0.628591	12	ENSG00000116985	-	BMP8B	224.8	-1.11447
chr1	40040030	40040464	40040024	40040082	12	0.635661	0.223969	0.393487	63	40040399	40040483	13	1.13054	0.00865513	0.0288238	97	ENSG00000131236	+	CAP1	7509	-0.0258684
chr1	40508766	40509140	40508718	40508809	226	0.618621	3.19432e-05	0.000186591	1144	40509094	40509155	3	4.44829	0.000955367	0.00413215	12	ENSG00000164002	+	EXO5	505.454	0.675321
chr1	40691616	40692065	40691984	40692080	582	1.33667	2.31793e-21	5.51968e-20	1635	40691595	40691854	450	0.893568	9.18343e-25	2.59469e-23	5279	ENSG00000272145	-	NFYC-AS1	139.488	1.22919
chr1	40861379	40862362	40862159	40862370	2581	0.439659	7.21939e-06	4.73209e-05	6226	40861375	40861426	4	0.657257	0.581354	0.741586	11	ENSG00000179862	-	CITED4	1705.5	0.300123
chr1	40979754	40979861	40979687	40979788	1266	-0.537683	1.08498e-10	1.28011e-09	7598	40979814	40979867	5	0.700532	0.466769	0.646483	20	ENSG00000171793	+	CTPS1	3338.2	-0.677573
chr1	42334464	42335231	42335152	42335251	1567	0.196456	0.0182101	0.0544153	7745	42334463	42334516	5	0.605661	0.483063	0.661776	22	ENSG00000198815	-	FOXJ3	2238.82	0.256546
chr1	42335385	42335879	42335738	42335886	145	0.170766	0.443734	0.625839	424	42335341	42335441	20	0.398797	0.254867	0.431749	134	ENSG00000198815	-	FOXJ3	2238.82	0.256546
chr1	42682425	42682583	42682393	42682699	1478	-0.651206	2.20216e-13	3.23928e-12	9445	42682530	42682586	4	-1.19585	0.188708	0.347711	24	ENSG00000065978	+	YBX1	8033.83	-0.793836
chr1	42817121	42817394	42817236	42817417	782	0.225663	0.0378015	0.0998932	5723	42817105	42817184	220	0.543629	0.000554295	0.00253327	835	ENSG00000177868	-	SVBP	294.21	0.00273313
chr1	43152724	43152969	43152653	43152772	23	6.78995	1.80007e-10	2.07969e-09	103	43152923	43152973	14	5.90015	9.67234e-08	8.27592e-07	57	ENSG00000186973	+	FAM183A	49.3853	1.76632
chr1	43172358	43172525	43172328	43172401	7	0.761214	0.232969	0.404425	39	43172479	43172531	8	1.11849	0.0870344	0.194479	39	ENSG00000243710	+	CFAP57	17.1494	1.38278
chr1	43270678	43270952	43270626	43270784	111	-0.894654	4.39629e-07	3.46328e-06	767	43270875	43270970	23	-0.761893	0.108978	0.231244	78	ENSG00000179178	+	TMEM125	518.072	-0.986758
chr1	43349236	43349501	43349231	43349285	6	0.632177	0.448789	0.63036	24	43349432	43349520	17	0.240621	0.504087	0.680336	127	ENSG00000117400	+	MPL	8.37014	-0.519456
chr1	43452494	43453908	43453751	43454005	190	-0.597458	1.22059e-08	1.1642e-07	2377	43452494	43452542	10	0.995014	0.24029	0.413314	22	ENSG00000178922	-	HYI	678.785	-0.604307
chr1	43453916	43454605	43453905	43453967	7	0.483672	0.369364	0.555558	56	43454560	43454607	30	-0.594404	0.26813	0.447048	60	ENSG00000229348	+	HYI-AS1	0.903389	-2.19845
chr1	43530885	43531663	43530871	43530954	2022	0.986256	2.33875e-24	6.48651e-23	12366	43531617	43531669	14	-0.00123083	0.998318	0.99912	47	ENSG00000142949	+	PTPRF	21291	0.91665
chr1	43705127	43707364	43707292	43707379	73	-1.65732	3.60508e-08	3.25319e-07	276	43705117	43705175	4	0.353986	0.719166	0.840455	16	ENSG00000236200	-	KDM4A-AS1	63.4951	-1.57528
chr1	44030413	44031461	44030410	44030497	309	1.36692	6.64652e-27	2.0604e-25	1386	44031322	44031619	22	-0.211999	0.345997	0.531784	381	ENSG00000230615	+	ENSG00000230615	55.6039	1.30213
chr1	44631967	44632208	44631948	44632023	3775	-1.22213	5.21058e-41	2.704e-39	11060	44632170	44632216	20	-1.12099	0.0143374	0.0444536	93	ENSG00000187147	+	RNF220	1617.51	-1.19471
chr1	45303831	45304065	45303821	45303980	39	-0.276363	0.271376	0.450478	285	45304020	45304079	6	1.42652	0.0376776	0.0996282	36	ENSG00000281912	+	LINC01144	47.3868	0.110857
chr1	45339721	45339969	45339841	45340132	173	-0.787245	8.34154e-09	8.11742e-08	1279	45339719	45339769	7	-3.04244	0.011349	0.0363504	24	ENSG00000132781	-	MUTYH	96.3579	-0.253352
chr1	45340222	45340413	45340010	45340296	48	-0.703731	6.21337e-05	0.000345085	656	45340340	45340440	44	-0.825922	0.000736691	0.00326947	319	ENSG00000132773	+	TOE1	431.483	-1.28498
chr1	45550897	45550988	45550796	45550898	233	0.337425	0.0018223	0.00736235	2545	45550936	45550990	4	2.17946	0.0463728	0.118127	17	ENSG00000117448	+	AKR1A1	2072.33	0.568928
chr1	45584044	45584668	45584038	45584097	5745	-1.67714	1.18336e-68	1.26468e-66	8851	45584533	45584684	28	-1.88886	3.10564e-08	2.82573e-07	211	ENSG00000132780	+	NASP	3252.03	-1.90271
chr1	45686648	45687101	45687030	45687130	251	-0.978269	1.80981e-18	3.70715e-17	2482	45686649	45686700	8	0.338237	0.605364	0.759387	37	ENSG00000159592	-	GPBP1L1	2755.42	0.0120204
chr1	45687352	45688109	45688039	45688113	10	-2.1874	0.000320894	0.00153913	72	45687264	45687403	49	-0.457777	0.198863	0.361607	135	ENSG00000159592	-	GPBP1L1	2755.42	0.0120204
chr1	46132754	46132915	46132784	46132921	547	3.68447	4.69387e-98	8.89688e-96	1461	46132750	46132832	12	2.09662	0.000117751	0.000619308	67	ENSG00000117461	-	PIK3R3	6674.63	1.675
chr1	46133087	46133341	46133292	46133357	54	1.42327	7.50225e-05	0.000410068	146	46132971	46133137	92	2.93373	9.77253e-28	3.14238e-26	350	ENSG00000117461	-	PIK3R3	6674.63	1.675
chr1	46340811	46341075	46340717	46340870	67	-1.47278	1.63021e-10	1.89197e-09	429	46341026	46341077	13	0.856872	0.174095	0.328533	40	ENSG00000117481	+	NSUN4	746.872	-1.2591
chr1	46668071	46668363	46668281	46668550	1268	-0.317674	0.000241596	0.00118735	11320	46668059	46668141	12	0.378409	0.426039	0.61027	69	ENSG00000123472	-	ATPAF1	2022.66	-0.369072
chr1	47314478	47314835	47314785	47314939	58	-1.31422	0.000255276	0.00124964	159	47314473	47314586	46	-0.921596	0.000289575	0.00140204	332	ENSG00000123473	-	STIL	1205.44	-2.51648
chr1	47333907	47334222	47333774	47333994	1490	-0.000490256	0.994888	0.997571	13332	47334174	47334232	26	0.436795	0.434519	0.618018	56	ENSG00000162368	+	CMPK1	3705.46	-0.114731
chr1	51329733	51330200	51330119	51330331	61	-0.609317	0.000340473	0.00162327	759	51329641	51329821	56	1.55969	1.41541e-28	4.73874e-27	1139	ENSG00000085831	-	TTC39A	3546.93	-0.0548902
chr1	51330531	51330561	51330484	51330829	1029	0.259014	0.00676335	0.0233119	4726	51330526	51330580	10	0.858395	0.1909	0.350879	45	ENSG00000085831	-	TTC39A	3546.93	-0.0548902
chr1	51330637	51331323	51331165	51331483	34	-0.301547	0.107779	0.229392	590	51330632	51330705	11	-0.0465589	0.932508	0.965206	56	ENSG00000085831	-	TTC39A	3546.93	-0.0548902
chr1	51344513	51345115	51344961	51345132	571	-0.246621	0.0418378	0.108564	2010	51344513	51344560	16	2.29383	0.0139264	0.043375	24	ENSG00000085831	-	TTC39A	3546.93	-0.0548902
chr1	51518271	51519265	51519196	51519384	921	-0.520505	1.31057e-08	1.2454e-07	3858	51518255	51518342	168	-0.404252	0.00562898	0.0198586	1206	ENSG00000085832	-	EPS15	2147.1	-0.403998
chr1	52033417	52033783	52033657	52033823	135	-0.257773	0.0889369	0.197701	910	52033411	52033492	6	1.43417	0.0239533	0.068539	42	ENSG00000198841	-	KTI12	154.927	-0.214236
chr1	52056303	52056306	52056289	52056375	2408	-0.191621	0.0357107	0.09537	12592	52056274	52056307	8	-0.681287	0.56691	0.730609	13	ENSG00000134717	+	BTF3L4	927.743	-0.453149
chr1	52365443	52366204	52366074	52366241	708	0.368494	0.000110601	0.000584724	6600	52365422	52365509	27	0.886133	0.000327544	0.00156844	288	ENSG00000154222	-	CC2D1B	1961.31	0.250152
chr1	53220359	53220623	53220563	53220658	584	0.0624222	0.523208	0.696106	3284	53220296	53220430	10	0.415598	0.348529	0.534277	82	ENSG00000162384	-	CZIB	968.263	0.0284704
chr1	53326461	53328069	53327985	53328077	595	-1.35784	1.88323e-36	8.51342e-35	3277	53326423	53326508	12	-2.61576	5.71364e-05	0.000319112	74	ENSG00000157193	-	LRP8	1804.29	-1.56464
chr1	53946076	53946313	53946048	53946129	23	-0.141314	0.725729	0.844683	112	53946233	53946320	118	-0.552697	0.000456041	0.00212306	951	ENSG00000116212	+	LRRC42	695.14	-0.704246
chr1	53946355	53946550	53946330	53946422	586	-0.608395	1.74311e-08	1.63221e-07	3605	53946501	53946551	21	0.689337	0.184144	0.341737	66	ENSG00000116212	+	LRRC42	695.14	-0.704246
chr1	54886582	54887194	54887128	54887207	9964	-0.223992	0.00565868	0.0199476	28594	54886574	54886633	31	-0.320325	0.418151	0.603738	113	ENSG00000116133	-	DHCR24	14683.3	-0.276347
chr1	58576425	58577251	58577201	58577268	33283	0.678706	7.39831e-12	9.68448e-11	46883	58576426	58576473	7	1.63302	0.114355	0.240022	20	ENSG00000184292	-	TACSTD2	12104.7	0.582342
chr1	61742479	61743233	61742448	61742547	1359	0.106823	0.281428	0.461525	3142	61743186	61743235	10	2.21476	0.00322151	0.0122013	35	ENSG00000132849	+	PATJ	2749.91	0.142064
chr1	63322566	63323741	63322534	63322618	62	-0.409088	0.272527	0.451811	140	63323690	63323769	17	0.8859	0.0662264	0.156769	75	ENSG00000187140	+	FOXD3	42.0995	-0.14327
chr1	66924989	66925205	66924955	66925060	410	-0.34111	0.00651773	0.0225692	1500	66925130	66925231	31	-0.534398	0.0970576	0.211727	179	ENSG00000198160	+	MIER1	943.152	-0.306699
chr1	67053725	67054385	67054333	67054390	10	-1.0773	0.0904732	0.200342	46	67053723	67053783	11	1.95483	0.00283588	0.010901	43	ENSG00000116704	-	SLC35D1	1354.57	0.389933
chr1	67685200	67686721	67685184	67685270	10452	4.24489	0	0	15146	67686664	67686803	43	5.11071	3.18656e-22	7.94161e-21	246	ENSG00000116717	+	GADD45A	4374.45	4.22695
chr1	67832223	67833437	67833383	67833479	973	-0.659835	1.87818e-09	1.96966e-08	8279	67832220	67832354	14	-0.669941	0.328754	0.514573	37	ENSG00000172380	-	GNG12	1539.43	-0.500965
chr1	68496695	68497081	68497029	68497114	672	-4.37821	2.8365e-158	1.47108e-155	3353	68496671	68496747	13	-3.38276	0.000582636	0.00264919	44	ENSG00000024526	-	DEPDC1	825.526	-4.87847
chr1	77979176	77979500	77979163	77979364	34	-0.379153	0.075045	0.173206	427	77979454	77979504	12	-0.999171	0.180679	0.337105	33	ENSG00000162616	+	DNAJB4	192.454	-0.0979449
chr1	84298369	84299053	84298365	84298422	5	-0.309066	0.6713	0.807949	32	84299008	84299056	10	1.2628	0.109838	0.232697	31	ENSG00000203943	+	SAMD13	15.702	-0.565974
chr1	84506268	84506577	84506525	84506585	128	1.0552	0.000228985	0.00113102	232	84506248	84506398	14	1.02851	0.0231988	0.0666849	84	ENSG00000174021	-	GNG5	564.583	-0.121282
chr1	85276305	85276521	85276444	85276644	261	0.940046	1.22389e-21	2.95607e-20	4870	85276295	85276357	55	2.56471	1.18586e-06	8.78136e-06	76	ENSG00000142867	-	BCL10	951.607	0.953952
chr1	85464767	85465158	85465110	85465172	2203	-0.263402	0.0134786	0.0422042	4924	85464746	85464844	19	-2.15579	6.10837e-08	5.3555e-07	170	ENSG00000153904	-	DDAH1	1246.64	-0.276677
chr1	85580760	85581372	85580682	85580809	749	0.460111	0.00199651	0.00798877	846	85581300	85581375	7	0.827246	0.266042	0.444645	28	ENSG00000142871	+	CCN1	331.69	0.607685
chr1	86704575	86704709	86704563	86704644	236	-0.623385	0.000214203	0.00106473	804	86704664	86704743	13	-0.407751	0.295319	0.477564	131	ENSG00000097033	+	SH3GLB1	946.571	-0.659599
chr1	88684272	88684741	88684234	88684413	723	-0.0586373	0.605004	0.759071	4010	88684692	88684751	13	-0.98548	0.114849	0.240772	55	ENSG00000065243	+	PKN2	1633.35	-0.0792632
chr1	89821031	89821793	89821006	89821097	245	-0.658657	2.42536e-06	1.71459e-05	1313	89821721	89821797	26	-1.21151	0.00553393	0.0195681	102	ENSG00000171492	+	LRRC8D	761.155	-0.747444
chr1	92029975	92030386	92029971	92030017	10	-2.13324	0.0192451	0.0569884	34	92030337	92030403	11	-3.78203	6.41482e-05	0.000355456	57	ENSG00000172031	+	EPHX4	15.9509	-3.56407
chr1	93180723	93181125	93180686	93180784	175	-2.08479	3.71216e-20	8.32612e-19	571	93181099	93181152	7	-0.654272	0.430116	0.614142	25	ENSG00000122483	+	CCDC18	279.553	-1.95762
chr1	93681014	93681836	93681677	93681855	1151	0.761291	1.59112e-11	2.01902e-10	2123	93681008	93681065	10	2.1772	6.40269e-05	0.000354807	66	ENSG00000137936	-	BCAR3	944.495	1.12592
chr1	93846432	93847218	93847167	93847239	21	-0.390957	0.416687	0.602568	74	93846416	93846547	13	-0.8209	0.0647492	0.154044	95	ENSG00000137936	-	BCAR3	944.495	1.12592
chr1	93909060	93909429	93909360	93909621	1348	1.41482	2.97809e-49	1.98233e-47	4122	93908990	93909130	21	0.8365	0.0163775	0.0497266	131	ENSG00000023909	-	GCLM	1812.71	0.87496
chr1	96721787	96722421	96721563	96721839	188	-0.91153	2.10616e-06	1.50313e-05	564	96722343	96722425	10	-0.553616	0.41236	0.59839	38	ENSG00000117569	+	PTBP2	295.32	-1.39281
chr1	98661722	98661873	98661703	98661892	582	-0.851499	7.01615e-17	1.30858e-15	3297	98661821	98661878	25	5.0641	2.27497e-08	2.10298e-07	79	ENSG00000162627	+	SNX7	616.406	-1.04452
chr1	100038094	100038835	100038076	100038245	850	0.247446	0.0228442	0.0658133	2940	100038787	100038838	11	1.42848	0.0150077	0.0461902	51	ENSG00000156875	+	MFSD14A	117.325	0.297575
chr1	101025856	101026102	101025839	101025928	77	-0.998315	3.12989e-08	2.84626e-07	679	101026057	101026107	8	-1.45032	0.230572	0.401517	14	ENSG00000233184	+	ENSG00000233184	97.7494	-0.877018
chr1	107056699	107057477	107056667	107056855	1481	-1.2698	3.18723e-42	1.72937e-40	10234	107057427	107057516	59	-1.02503	5.92592e-07	4.58329e-06	591	ENSG00000198890	+	PRMT6	10418.1	-1.29068
chr1	107964689	107965131	107965067	107965243	84	-0.171057	0.255652	0.432669	848	107964684	107964738	7	0.22854	0.801325	0.891964	19	ENSG00000134215	-	VAV3	1058.65	-0.653276
chr1	108199525	108200173	108200101	108200349	2887	-0.78764	1.26518e-23	3.38137e-22	33691	108199383	108199594	34	0.726689	0.0134379	0.042097	213	ENSG00000085491	-	SLC25A24	8785.1	-0.885336
chr1	108200412	108200871	108200388	108200552	392	-0.325102	0.0252442	0.0716001	1370	108200816	108200903	32	-0.598853	0.0442954	0.113768	205	ENSG00000280186	+	ENSG00000280186	51.6869	0.904643
chr1	108560099	108561117	108559993	108560149	5328	-0.711831	1.42317e-16	2.60016e-15	13412	108561066	108561144	32	-2.79298	4.23046e-08	3.78481e-07	145	ENSG00000162636	+	FAM102B	3246.9	-0.797941
chr1	108661190	108661256	108661202	108661289	192	-0.612398	0.000109413	0.000579135	1028	108661113	108661211	17	0.645514	0.0541726	0.133893	154	ENSG00000162639	-	HENMT1	1827.76	-0.676011
chr1	108746673	108747404	108746656	108746756	1991	0.319654	0.00398564	0.0147036	8694	108747353	108747427	46	0.69417	0.05347	0.132528	125	ENSG00000116266	+	STXBP3	3591.51	0.260681
chr1	109090772	109090890	109090737	109090846	667	0.174637	0.0778347	0.178257	4807	109090841	109090927	182	-0.0147275	0.941263	0.970231	459	ENSG00000215717	+	TMEM167B	2129.54	0.0113632
chr1	109213917	109214374	109213887	109213995	9215	1.00973	4.46133e-22	1.10179e-20	44107	109214264	109214379	22	2.27048	1.14619e-08	1.09745e-07	133	ENSG00000031698	+	SARS1	14380.2	1.00394
chr1	109249540	109250007	109249506	109249622	5403	0.790761	1.26587e-17	2.47655e-16	22633	109249950	109250008	5	-0.148069	0.873837	0.934185	20	ENSG00000143126	+	CELSR2	46603.5	0.744132
chr1	109426070	109426436	109426363	109426454	6762	-0.0856588	0.266284	0.44489	37796	109426071	109426143	13	2.43311	0.00138828	0.00577815	35	ENSG00000143106	-	PSMA5	9329.95	-0.163515
chr1	109483958	109484202	109483839	109484017	767	0.500757	2.19432e-06	1.5617e-05	2987	109484150	109484210	19	0.481525	0.378994	0.565284	60	ENSG00000162650	+	ATXN7L2	713.354	0.566551
chr1	109494093	109494296	109494061	109494163	577	0.477567	1.70347e-08	1.59615e-07	4747	109494247	109494303	9	-0.255075	0.745132	0.85678	26	ENSG00000174151	+	CYB561D1	3361.66	0.438618
chr1	109619836	109621040	109619818	109619910	139	-1.1665	4.88427e-08	4.33351e-07	466	109620994	109621068	8	0.0623853	0.912554	0.955233	57	ENSG00000116337	+	AMPD2	1622.2	-1.01702
chr1	110338538	110339048	110338992	110339178	45	-0.922655	0.000929979	0.00403411	243	110338535	110338594	4	-0.102367	0.932446	0.965204	12	ENSG00000227963	-	RBM15-AS1	24.0373	-0.125525
chr1	110339439	110340024	110339421	110339511	611	-0.0383729	0.671824	0.808294	3792	110339971	110340032	5	2.49831	0.000764451	0.00337778	37	ENSG00000162775	+	RBM15	849.391	0.164024
chr1	110407353	110407693	110407607	110407700	6191	-0.530331	1.19858e-12	1.67338e-11	21830	110407352	110407404	10	-2.18542	0.0969679	0.211603	14	ENSG00000134248	-	LAMTOR5	2456.3	-0.610184
chr1	110963338	110963921	110963855	110964021	1668	0.17129	0.0536148	0.132829	4770	110963326	110963405	6	0.77559	0.10467	0.224356	71	ENSG00000121931	-	LRIF1	1304.1	0.253766
chr1	111139500	111139767	111139476	111139553	16	0.0995416	0.819307	0.902438	88	111139705	111139768	7	-2.20323	0.00102311	0.00439658	57	ENSG00000134255	+	CEPT1	1168.81	-0.0303581
chr1	111139848	111140158	111140033	111140179	230	-0.312306	0.00515394	0.018379	2119	111139831	111139918	15	-1.92676	1.66891e-05	0.000102852	121	ENSG00000156171	-	DRAM2	580.567	-0.539442
chr1	111202572	111204406	111204301	111204522	431	0.229377	0.00868807	0.0289146	6735	111202571	111202621	7	1.10367	0.144344	0.285827	29	ENSG00000162777	-	DENND2D	1898.64	0.513695
chr1	111619827	111620398	111619760	111619940	1182	-0.00753666	0.927385	0.963109	6350	111620343	111620401	7	0.0135432	0.982153	0.990587	44	ENSG00000116473	+	RAP1A	2162.1	-0.181276
chr1	111738606	111739381	111739329	111739420	422	2.34332	4.6488e-104	9.8494e-102	2790	111738586	111738675	182	5.75842	7.72157e-52	5.48991e-50	708	ENSG00000197852	-	INKA2	2197.66	2.81478
chr1	111989511	111989942	111989457	111989513	4	0.412952	0.560774	0.726067	39	111989883	111989950	4	-0.719962	0.335573	0.521576	32	ENSG00000231437	+	LINC01750	46.1041	0.81994
chr1	112618796	112619124	112619070	112619145	663	-0.695503	4.16647e-12	5.56425e-11	3212	112618740	112618818	12	-0.774519	0.107667	0.229216	78	ENSG00000007341	-	ST7L	361.614	-0.590022
chr1	112619186	112619755	112619588	112619756	12	-0.350231	0.391072	0.577765	105	112619160	112619264	121	-0.158747	0.307357	0.491557	929	ENSG00000007341	-	ST7L	361.614	-0.590022
chr1	112619831	112620302	112619715	112619884	10290	-0.05311	0.480648	0.659633	23187	112620252	112620305	4	-0.0689395	0.926434	0.962753	31	ENSG00000116489	+	CAPZA1	6551.21	-0.119689
chr1	112703002	112705163	112704998	112705169	520	2.92546	3.06113e-155	1.48721e-152	3650	112702999	112703054	5	1.54091	0.101493	0.218922	19	ENSG00000155366	-	RHOC	9790.9	1.81899
chr1	112705582	112707126	112707074	112707133	31452	1.36745	9.48554e-59	7.97087e-57	42188	112705580	112705631	5	1.70962	0.0902784	0.199973	18	ENSG00000155366	-	RHOC	9790.9	1.81899
chr1	113758949	113759525	113759457	113759562	286	-1.41654	5.31996e-31	1.98031e-29	3576	113758948	113759074	9	-0.121506	0.844924	0.918096	44	ENSG00000116793	-	PHTF1	1301.8	-1.37979
chr1	113811290	113812274	113812211	113812302	1109	0.103543	0.235454	0.407317	8450	113811291	113811341	6	-3.47558	0.00696188	0.0239072	19	ENSG00000081019	-	RSBN1	2063.55	0.0829293
chr1	113904970	113905027	113904978	113905239	480	0.0790933	0.526494	0.698763	1924	113904953	113905034	14	0.467206	0.322399	0.508096	71	ENSG00000134262	-	AP4B1	2408.5	-0.95938
chr1	113905416	113905680	113905300	113905469	1032	-2.01267	5.1814e-119	1.46493e-116	9829	113905633	113905687	4	-3.03983	0.00297963	0.0113872	35	ENSG00000118655	+	DCLRE1B	3152.67	-1.40905
chr1	113929365	113929513	113929450	113929557	54	0.638316	0.000496072	0.00229069	551	113929353	113929413	32	0.618382	0.0275811	0.0770596	218	ENSG00000235527	-	HIPK1-AS1	104.983	1.72839
chr1	113929649	113930225	113929619	113929731	5978	0.204504	0.0169137	0.0511287	31386	113930082	113930227	25	2.62966	1.99691e-09	2.08821e-08	123	ENSG00000163349	+	HIPK1	20871.9	0.102447
chr1	114510959	114511202	114511034	114511216	2620	0.121975	0.210462	0.376909	12720	114510960	114511010	6	4.0243	0.000522266	0.00240117	27	ENSG00000197323	-	TRIM33	14296.2	0.0835418
chr1	114757662	114757982	114757913	114757995	9101	-0.165038	0.0125356	0.0396273	52990	114757635	114757711	17	0.109147	0.855428	0.924052	47	ENSG00000009307	-	CSDE1	102649	-0.177765
chr1	115641969	115642880	115641865	115642023	1475	-0.597119	2.42265e-14	3.82591e-13	14279	115642832	115642887	4	-0.145145	0.858824	0.925764	25	ENSG00000173218	+	VANGL1	3947.51	-0.538696
chr1	115976532	115976806	115976504	115976617	33	-0.868943	0.00540388	0.0191532	204	115976761	115976824	4	0.333756	0.654091	0.795807	31	ENSG00000163393	+	SLC22A15	216.241	-0.0910375
chr1	116373243	116373949	116373201	116373297	48428	0.472278	2.99277e-06	2.08691e-05	79353	116373898	116373956	4	-1.34038	0.172201	0.325926	22	ENSG00000163399	+	ATP1A1	34772.9	0.263365
chr1	116570486	116571009	116570958	116571052	697	-0.221455	0.00906303	0.0299965	4907	116570485	116570537	8	-0.201388	0.742759	0.855194	45	ENSG00000116815	-	CD58	549.653	-0.317523
chr1	116667063	116667706	116667624	116667814	1036	0.600591	1.34654e-13	2.01506e-12	7618	116667062	116667110	6	1.1339	0.140924	0.280806	27	ENSG00000143061	-	IGSF3	7585.09	0.445733
chr1	116909922	116910592	116909878	116909969	911	-0.100634	0.303148	0.486593	5074	116910544	116910601	6	1.38948	0.057966	0.141302	30	ENSG00000134247	+	PTGFRN	3566.53	0.144444
chr1	117060326	117060844	117060312	117060379	1282	-1.56496	1.09912e-59	9.49079e-58	5625	117060795	117060849	18	-1.24519	0.0276346	0.0771842	62	ENSG00000116830	+	TTF2	3237.74	-1.80758
chr1	117928992	117929620	117929552	117929638	197	0.265661	0.0281329	0.0783529	1522	117928959	117929042	20	0.874717	0.111196	0.234854	60	ENSG00000196505	-	GDAP2	1011.2	0.398765
chr1	119140412	119140652	119140381	119140466	225	0.0558971	0.739698	0.853373	702	119140598	119140674	201	-0.192462	0.158434	0.306562	1152	ENSG00000231365	+	WARS2-AS1	478.952	-0.249049
chr1	144460894	144461666	144461551	144461685	287	-1.43593	6.25974e-28	2.0306e-26	3334	144460855	144460945	19	-2.4496	2.6128e-05	0.000155098	83	ENSG00000266338	-	NBPF15	1665.34	-1.57995
chr1	145823870	145824094	145823907	145824101	3033	-0.268933	0.000302348	0.00145811	24148	145823857	145823948	27	-0.167233	0.625009	0.774627	150	ENSG00000265491	-	RNF115	2932.39	-0.382123
chr1	145824218	145824561	145824051	145824272	608	-0.592882	7.56373e-10	8.24723e-09	5694	145824516	145824567	9	0.609046	0.392552	0.57921	32	ENSG00000186141	+	POLR3C	1831.86	-0.610658
chr1	145859174	145859806	145859728	145859839	496	-0.407771	5.942e-05	0.000331057	3173	145859146	145859231	32	0.88011	0.00926121	0.0305632	149	ENSG00000131788	-	PIAS3	4571.83	-0.0732356
chr1	145919012	145919517	145919000	145919071	15	-1.5783	0.0002206	0.00109363	119	145919465	145919527	5	-3.51419	0.000262249	0.00128036	48	ENSG00000211451	+	GNRHR2	91.6974	-1.88636
chr1	145995425	145996578	145996526	145996584	2763	1.64657	5.94139e-42	3.18693e-40	5684	145995425	145995474	3	2.967	0.0213928	0.0622618	14	ENSG00000265972	-	TXNIP	9406.92	1.63398
chr1	147172540	147172560	147172420	147172662	270	0.638898	8.44771e-08	7.27671e-07	2106	147172528	147172591	23	-0.812412	0.148827	0.292335	57	ENSG00000131791	-	PRKAB2	2335.93	0.69068
chr1	147172778	147172799	147172688	147172850	223	-1.75702	7.33112e-25	2.08317e-23	984	147172753	147172803	4	2.30628	0.060626	0.14631	14	ENSG00000237188	+	ENSG00000237188	0.656528	0.915454
chr1	147242685	147243049	147242649	147242828	1218	-1.51861	1.08267e-42	5.99376e-41	4951	147243000	147243077	181	-0.371413	0.0995568	0.215843	378	ENSG00000131778	+	CHD1L	62.5696	-1.65167
chr1	147669695	147670251	147670201	147670281	82	-0.482295	0.0530513	0.131738	282	147669683	147669733	9	0.495057	0.277681	0.457451	78	ENSG00000162836	-	ACP6	819.16	-0.556918
chr1	149102780	149103560	149103399	149103567	253	-1.58373	2.42622e-29	8.3818e-28	1489	149102744	149102830	27	-1.51404	0.000942078	0.00408052	101	ENSG00000269713	-	NBPF9	1093.41	-1.63339
chr1	149885731	149886681	149886630	149886688	92023	-1.69769	1.00643e-81	1.418e-79	118515	149885732	149885844	7	-4.47189	0.000112782	0.000595141	37	ENSG00000184678	-	H2BC21	8191	2.09098
chr1	149899596	149899856	149899558	149899650	496	-0.407862	1.82685e-05	0.000111634	4045	149899788	149899880	10	-1.10566	0.0116904	0.0372844	101	ENSG00000178096	+	BOLA1	1027.32	-0.334526
chr1	150234741	150236111	150235796	150236149	7482	-3.02438	6.35245e-216	7.67158e-213	18917	150234739	150234788	11	-0.0712757	0.929836	0.96406	24	ENSG00000143401	-	ANP32E	3292.91	-3.19742
chr1	150268433	150269020	150268945	150269030	1716	-0.334102	7.3004e-05	0.000399862	10224	150268429	150268505	13	-0.0253403	0.953683	0.976354	89	ENSG00000117362	-	APH1A	8209.45	-0.555077
chr1	150364169	150364573	150364142	150364249	459	-0.696903	4.04886e-11	4.95691e-10	3111	150364534	150364592	6	-1.02477	0.151018	0.295587	37	ENSG00000163125	+	RPRD2	3365.08	-0.744548
chr1	150561475	150562121	150562048	150562154	15	0.930105	0.0121972	0.0387057	119	150561464	150561650	117	1.20513	4.8177e-06	3.24879e-05	314	ENSG00000203804	-	ADAMTSL4-AS1	14.796	3.35233
chr1	150578753	150579609	150579549	150579616	3479	0.898439	1.19696e-27	3.82845e-26	10599	150578742	150578804	21	3.88194	1.90863e-08	1.77912e-07	72	ENSG00000143384	-	MCL1	20954.3	0.903275
chr1	150629313	150629576	150629524	150629604	28780	0.357912	5.03865e-06	3.38671e-05	91122	150629312	150629461	25	1.71678	8.03177e-06	5.22167e-05	132	ENSG00000143420	-	ENSA	16576.4	0.24444
chr1	150971902	150971965	150971907	150971980	38	0.491651	0.222586	0.391774	104	150971897	150971953	10	0.538304	0.467513	0.64727	29	ENSG00000143418	-	CERS2	24742.6	0.272671
chr1	150973213	150974689	150974614	150974720	1045	-0.522953	1.94276e-09	2.03385e-08	17569	150973211	150973262	12	1.25827	0.155924	0.302835	22	ENSG00000143418	-	CERS2	24742.6	0.272671
chr1	150974421	150974845	150974773	150974864	5765	0.718329	2.55966e-14	4.03249e-13	26573	150974422	150974443	10	1.59105	0.152258	0.297519	13	ENSG00000143418	-	CERS2	24742.6	0.272671
chr1	150974952	150977427	150977377	150977433	6	0.251502	0.761379	0.867403	25	150974943	150975003	13	-1.06838	0.0427282	0.11041	71	ENSG00000143418	-	CERS2	24742.6	0.272671
chr1	151047750	151048572	151047721	151047902	510	-1.48847	1.22356e-52	8.90148e-51	3589	151048501	151048582	15	-1.21939	0.00295319	0.0112959	123	ENSG00000143443	+	C1orf56	492.175	-1.42533
chr1	151058863	151059572	151059520	151059605	2396	1.397	1.15623e-68	1.23725e-66	17529	151058857	151058916	580	4.40971	4.18539e-101	8.32508e-99	1380	ENSG00000197622	-	CDC42SE1	12600.7	1.33522
chr1	151070618	151070770	151070508	151070669	57	0.57239	0.0262257	0.0738539	260	151070723	151070789	8	-0.109201	0.892455	0.94412	27	ENSG00000143458	+	GABPB2	1086.48	-0.166783
chr1	151070795	151071093	151070756	151070862	99	-0.661897	0.000100425	0.000535245	723	151070938	151071123	51	-1.08609	1.17343e-06	8.69308e-06	443	ENSG00000143458	+	GABPB2	1086.48	-0.166783
chr1	151166143	151166555	151166018	151166207	1514	0.222678	0.0087357	0.0290569	9937	151166506	151166559	28	2.47962	1.7445e-05	0.000107074	62	ENSG00000163156	+	SCNM1	2599.47	0.201863
chr1	151281598	151281672	151281502	151281680	39	-0.913146	0.000205717	0.00102593	326	151281625	151281711	125	-0.272488	0.0976288	0.212617	700	ENSG00000143373	+	ZNF687	6639.19	0.837443
chr1	151281775	151281896	151281874	151281969	45	-0.107264	0.619173	0.770141	382	151281774	151281824	5	1.80206	0.0301331	0.0829263	25	ENSG00000232671	-	ZNF687-AS1	80.95	0.255143
chr1	151282298	151282387	151282169	151282358	4286	1.04311	1.12612e-25	3.31123e-24	12157	151282316	151282403	60	0.198731	0.628571	0.777082	93	ENSG00000143373	+	ZNF687	6639.19	0.837443
chr1	151327103	151327415	151327346	151327442	739	-0.249199	0.00212119	0.00842615	5436	151327079	151327161	16	-0.474684	0.184572	0.342261	145	ENSG00000143393	-	PI4KB	6329.97	0.168213
chr1	151327452	151327656	151327594	151327681	718	0.817636	2.30336e-16	4.14998e-15	3449	151327452	151327499	9	1.41659	0.229665	0.400439	12	ENSG00000143393	-	PI4KB	6329.97	0.168213
chr1	151347004	151347251	151347142	151347267	351	1.07425	7.43427e-22	1.81427e-20	2178	151346985	151347076	15	-0.0843078	0.785598	0.882565	175	ENSG00000143390	-	RFX5	2662.12	0.972367
chr1	151458746	151459493	151459427	151459510	112	0.788295	2.32837e-05	0.000139359	523	151458735	151458905	26	-0.182344	0.599169	0.754875	148	ENSG00000143442	-	POGZ	4301.01	-0.0305397
chr1	151511386	151513201	151511350	151511468	697	-0.689484	1.27472e-11	1.63346e-10	3395	151513150	151513214	16	-1.04215	0.0331174	0.0897053	82	ENSG00000143375	+	CGN	2958.14	-0.70155
chr1	151612188	151612420	151612014	151612324	699	-0.01584	0.863829	0.928169	8291	151612368	151612430	8	0.683345	0.207408	0.372933	55	ENSG00000143376	+	SNX27	3868.09	0.12444
chr1	151762987	151763495	151763432	151763504	6529	-0.449557	1.12851e-07	9.58695e-07	22138	151762955	151763168	69	-0.465614	0.0120188	0.0382158	540	ENSG00000143436	-	MRPL9	3985.88	-0.502158
chr1	151830903	151831797	151831747	151831814	20	-0.715966	0.114308	0.239935	88	151830872	151830953	8	0.477401	0.304869	0.488659	74	ENSG00000143365	-	RORC	42.0663	0.00328933
chr1	151907142	151909510	151909376	151909517	302	-1.4905	4.54235e-35	1.96315e-33	2063	151907142	151907189	10	-0.137173	0.906163	0.951534	15	ENSG00000159445	-	THEM4	307.712	-1.42712
chr1	151909589	151909842	151909788	151909850	18	-0.339873	0.485114	0.663457	72	151909580	151909637	4	0.653815	0.349208	0.534969	33	ENSG00000159445	-	THEM4	307.712	-1.42712
chr1	151992764	151993811	151993759	151993846	25496	1.28229	5.24673e-68	5.51664e-66	98258	151992662	151992910	86	0.994458	1.52685e-06	1.11185e-05	489	ENSG00000197747	-	S100A10	13250.4	1.30661
chr1	152035275	152037003	152036927	152037032	25833	1.04242	3.8178e-47	2.39778e-45	179907	152035273	152035375	13	0.648853	0.139029	0.278012	89	ENSG00000163191	-	S100A11	14989.3	1.05217
chr1	153566786	153568653	153568603	153568669	5	2.05403	0.0177271	0.0532166	25	153566776	153566834	11	1.10096	0.0929129	0.204602	39	ENSG00000196754	-	S100A2	19.3606	1.04319
chr1	153614832	153616323	153616189	153616342	641	0.293853	0.00333633	0.0125714	2452	153614833	153614880	10	0.776554	0.362797	0.548569	25	ENSG00000189334	-	S100A14	9830.77	0.535801
chr1	153634065	153634360	153634047	153634145	3525	0.405008	3.45434e-07	2.76086e-06	14109	153634279	153634450	364	1.13223	3.40488e-24	9.36658e-23	1942	ENSG00000160679	+	CHTOP	5823.8	0.473508
chr1	153658716	153658868	153658688	153658770	1648	-0.306869	0.00142467	0.00591039	9903	153658817	153658907	21	0.763805	0.01865	0.0555239	155	ENSG00000143553	+	SNAPIN	809.135	-0.291278
chr1	153678637	153679211	153678604	153678892	29	1.44116	4.03235e-10	4.51435e-09	383	153679164	153679215	8	2.02237	0.0140589	0.0437295	28	ENSG00000169418	+	NPR1	1017.42	1.52619
chr1	153775406	153776121	153775248	153775482	152	-1.71705	5.42224e-28	1.7657e-26	1254	153776075	153776175	52	-0.653415	0.00369186	0.013742	385	ENSG00000143554	+	SLC27A3	2094.26	-1.62001
chr1	153945990	153946628	153946580	153946749	210	-0.545834	4.37162e-06	2.96883e-05	3020	153945952	153946352	44	0.851007	7.70824e-06	5.02847e-05	559	ENSG00000198837	-	DENND4B	3119.04	-0.444042
chr1	153958282	153958593	153958532	153958620	1146	0.389475	4.92811e-07	3.85101e-06	8557	153958274	153958349	20	0.908148	0.0405201	0.105762	84	ENSG00000160741	-	CRTC2	1788.27	0.378752
chr1	153967486	153967724	153967358	153967608	241	-0.0243839	0.869094	0.931364	1058	153967576	153967751	110	-0.0736493	0.710963	0.834959	521	ENSG00000143578	+	CREB3L4	1000.82	-1.11502
chr1	153967902	153968150	153967819	153967954	113	-2.12667	1.42067e-14	2.27846e-13	353	153968099	153968156	69	0.593634	0.128479	0.261686	123	ENSG00000143578	+	CREB3L4	1000.82	-1.11502
chr1	153977170	153977657	153977579	153977683	2153	-0.402518	4.64631e-06	3.14099e-05	13456	153977165	153977232	6	-1.30282	0.0653805	0.155231	43	ENSG00000143543	-	JTB	677.053	-0.574073
chr1	153977743	153977982	153977722	153977791	19	-1.43775	0.000462089	0.00214857	133	153977916	153978006	28	-1.49729	0.000119721	0.000628423	138	ENSG00000272654	+	ENSG00000272654	42.4698	-1.56839
chr1	154220172	154220568	154220496	154220697	1996	-0.0419501	0.564838	0.728945	23052	154220158	154220219	5	-2.15837	0.0147988	0.0456696	36	ENSG00000143612	-	C1orf43	9143.01	-0.0214811
chr1	154220954	154221474	154220847	154221035	1893	-0.0803672	0.356197	0.541904	7801	154221424	154221476	6	-0.790462	0.213554	0.380792	46	ENSG00000143569	+	UBAP2L	7733.54	-0.307824
chr1	154328797	154329738	154328642	154328879	371	0.781058	2.94947e-15	4.95501e-14	3985	154329693	154329739	10	-0.31201	0.777205	0.877534	16	ENSG00000143515	+	ATP8B2	2608.65	0.452507
chr1	154627409	154627967	154627897	154627984	791	-0.689477	7.60538e-10	8.28836e-09	3365	154627400	154627458	34	0.847594	0.0843552	0.189746	73	ENSG00000160710	-	ADAR	10330.1	-0.518016
chr1	154936650	154936709	154936634	154936737	565	-0.814101	7.04461e-17	1.31346e-15	4842	154936620	154936675	4	-0.532414	0.520868	0.694326	27	ENSG00000163344	-	PMVK	1520.35	-0.689535
chr1	154961546	154961781	154961714	154961797	1475	-0.266952	0.00226908	0.00894219	10600	154961538	154961632	74	-0.319636	0.065878	0.156145	714	ENSG00000163348	-	PYGO2	2644.04	-0.194127
chr1	154961829	154962003	154961797	154961902	162	0.973533	2.78407e-11	3.46007e-10	1012	154961938	154962025	46	0.76163	0.0435379	0.112132	119	ENSG00000271380	+	ENSG00000271380	192.661	0.152759
chr1	154962028	154962799	154962751	154962968	79	0.459466	0.111201	0.234859	223	154961995	154962100	32	-0.0389433	0.911426	0.954738	148	ENSG00000163348	-	PYGO2	2644.04	-0.194127
chr1	154973917	154974375	154974322	154974411	1170	0.293664	0.000986415	0.00425251	6309	154973887	154973968	18	0.499689	0.122659	0.253041	155	ENSG00000160691	-	SHC1	3470.79	0.523486
chr1	155002765	155003645	155002621	155002841	494	0.301458	0.000738629	0.00327704	4310	155003575	155003668	16	2.58583	3.04082e-15	5.1034e-14	210	ENSG00000160685	+	ZBTB7B	5631.8	0.652815
chr1	155050662	155051151	155050631	155050716	8	-1.52299	0.00618903	0.0215671	68	155051099	155051189	46	-0.837212	0.000788269	0.0034714	331	ENSG00000143537	+	ADAM15	6802.21	-0.735864
chr1	155063752	155063973	155063712	155063806	1174	-0.431106	4.9873e-06	3.35439e-05	3846	155063917	155063991	141	0.671269	0.00447092	0.0162379	298	ENSG00000243364	+	EFNA4	425.884	-0.489647
chr1	155127875	155129958	155127870	155127955	1180	0.0586808	0.582282	0.742172	2928	155129890	155129960	36	0.318539	0.514619	0.689403	68	ENSG00000169242	+	EFNA1	998.34	-0.14468
chr1	155135374	155135708	155135296	155135440	28	-0.47661	0.161356	0.310743	162	155135657	155135753	18	0.157069	0.67693	0.811892	122	ENSG00000169241	+	SLC50A1	2330.1	-0.56303
chr1	155135851	155136377	155135816	155135903	2683	-0.565209	6.0851e-13	8.68202e-12	9482	155136332	155136382	12	-3.08322	0.0229024	0.0659606	15	ENSG00000169241	+	SLC50A1	2330.1	-0.56303
chr1	155208746	155209166	155209093	155209186	86	0.288487	0.128515	0.261749	574	155208733	155208875	23	0.252367	0.479088	0.658048	127	ENSG00000169231	-	THBS3	720.555	0.30256
chr1	155262039	155262359	155262193	155262379	1610	-0.520939	3.38507e-10	3.81242e-09	17251	155262037	155262087	5	-2.92384	0.0332932	0.0900518	13	ENSG00000116521	-	SCAMP3	2524.78	-0.568486
chr1	155320631	155323116	155323071	155323137	6	-1.31468	0.0688575	0.16167	43	155320629	155320665	9	0.453029	0.627662	0.776435	20	ENSG00000225855	-	RUSC1-AS1	104.245	0.668025
chr1	155323462	155323800	155323456	155323557	45	-1.64285	4.63387e-08	4.12303e-07	247	155323750	155323839	51	0.572551	0.022207	0.0642601	290	ENSG00000160753	+	RUSC1	3068.73	-1.24493
chr1	155323924	155324339	155323922	155323976	23	1.19273	0.0184277	0.0549412	65	155324288	155324387	16	1.3175	0.000200543	0.00100243	148	ENSG00000160753	+	RUSC1	3068.73	-1.24493
chr1	155324518	155324979	155324408	155324682	407	-1.3753	1.92125e-33	7.78595e-32	2655	155324933	155324981	14	-2.32674	0.0323674	0.0880489	23	ENSG00000160753	+	RUSC1	3068.73	-1.24493
chr1	155325161	155326726	155325161	155325209	9	-0.0258105	0.970424	0.984758	33	155326680	155326732	4	-0.267206	0.813052	0.898763	13	ENSG00000160753	+	RUSC1	3068.73	-1.24493
chr1	155562029	155562409	155562027	155562099	47	-0.909481	0.0166792	0.0505049	125	155562363	155562423	10	-0.804737	0.0725443	0.168571	92	ENSG00000235919	+	ASH1L-AS1	227.467	0.866922
chr1	155562414	155562769	155562536	155562923	253	0.306747	0.00208887	0.0083134	2953	155562400	155562452	16	0.01861	0.977405	0.988083	37	ENSG00000116539	-	ASH1L	5433.25	0.517824
chr1	155562963	155563136	155563027	155563163	80	1.51806	5.04661e-14	7.78504e-13	499	155562949	155563041	166	1.07981	1.14033e-08	1.09247e-07	501	ENSG00000116539	-	ASH1L	5433.25	0.517824
chr1	155687947	155688318	155687929	155688017	128	-1.6617	5.60493e-08	4.93612e-07	268	155688166	155688325	106	-1.22041	1.64802e-05	0.000101625	278	ENSG00000132676	+	DAP3	4613.6	0.0588795
chr1	155688314	155688773	155688599	155688794	413	-0.197159	0.035962	0.095894	4747	155688302	155688360	3	-1.40991	0.19244	0.352971	18	ENSG00000163374	-	YY1AP1	1753.57	-0.10455
chr1	156114710	156115358	156114705	156114854	25425	1.30733	3.62926e-59	3.08655e-57	33538	156115306	156115361	8	2.49174	0.00551441	0.0195057	26	ENSG00000160789	+	LMNA	25851.7	1.30668
chr1	156124010	156126214	156123980	156124061	35	5.3347	4.93743e-12	6.54935e-11	125	156126162	156126218	10	3.77169	0.00151304	0.00624299	23	ENSG00000160789	+	LMNA	25851.7	1.30668
chr1	156134458	156135994	156134399	156134509	144	1.07467	8.21168e-05	0.00044536	266	156135957	156135998	7	1.81387	0.0248919	0.0707411	30	ENSG00000160789	+	LMNA	25851.7	1.30668
chr1	156213006	156213243	156212988	156213055	1607	-0.5616	1.71366e-09	1.80473e-08	7150	156213163	156213258	34	0.981632	0.00161715	0.00662438	175	ENSG00000260238	+	PMF1-BGLAP	14.6397	0.572329
chr1	156456668	156457351	156457199	156457358	9	0.189796	0.737154	0.851649	55	156456663	156456714	9	0.709132	0.267826	0.446682	40	ENSG00000125462	-	MIR9-1HG	16.0506	1.27559
chr1	156691974	156693407	156693357	156693413	4	-0.979301	0.258103	0.435532	25	156691974	156692027	14	0.293856	0.59016	0.747894	52	ENSG00000237588	-	ENSG00000237588	5.30909	1.56533
chr1	156705169	156705582	156705532	156705589	31463	-0.115157	0.22754	0.397857	39793	156705165	156705216	4	1.97464	0.0628991	0.150587	16	ENSG00000143320	-	CRABP2	8120.97	-0.0924462
chr1	156728468	156728715	156728455	156728531	500	0.244571	0.024273	0.069285	2107	156728639	156728742	556	0.1001	0.313035	0.49799	4478	ENSG00000143303	+	RRNAD1	983.948	0.10965
chr1	156747328	156748712	156748657	156748717	11	0.126788	0.813668	0.899051	56	156747300	156747387	10	-1.04623	0.0495283	0.124603	68	ENSG00000143321	-	HDGF	19931.8	-0.958403
chr1	156751209	156751673	156751518	156751708	9643	-1.09291	5.14724e-42	2.76623e-40	87802	156751208	156751259	24	-2.5151	0.0166268	0.0503731	26	ENSG00000143321	-	HDGF	19931.8	-0.958403
chr1	157073177	157073799	157073173	157073225	5109	0.0985601	0.740542	0.853925	5274	157073739	157073825	307	-0.278595	0.672907	0.809058	914	ENSG00000224520	+	KRT8P45	11375.6	0.148089
chr1	157138504	157138539	157138458	157138631	189	0.667929	3.27866e-06	2.27091e-05	961	157138465	157138522	4	0.468779	0.440995	0.62333	43	ENSG00000117036	-	ETV3	1754.91	0.458222
chr1	160261760	160262450	160262399	160262568	1272	-0.0293453	0.742625	0.855146	6919	160261739	160261811	8	-0.350128	0.491319	0.66912	64	ENSG00000132716	-	DCAF8	1182.84	-0.24968
chr1	161038409	161038921	161038870	161038983	4109	-0.00988587	0.909785	0.953686	46957	161038406	161038456	6	-1.97347	0.0451047	0.115474	25	ENSG00000215845	-	TSTD1	1101.7	-0.139837
chr1	161045265	161045976	161045897	161045992	148	-0.277678	0.0354224	0.0947136	1252	161045266	161045314	11	-0.741426	0.41879	0.604308	22	ENSG00000158773	-	USF1	1627.5	-0.126823
chr1	161132574	161132666	161132535	161132806	206	-0.496378	7.9829e-05	0.000434038	1608	161132558	161132632	36	0.00420344	0.9883	0.993884	199	ENSG00000158796	-	DEDD	958.505	-0.535971
chr1	161153982	161154153	161153966	161154125	1292	-0.209611	0.0277427	0.0774291	5245	161154080	161154175	32	-0.414162	0.248506	0.423867	156	ENSG00000143222	+	UFC1	1868.34	-0.293242
chr1	161749801	161750275	161749764	161749863	421	-0.805284	5.12079e-12	6.78406e-11	2583	161750203	161750302	62	-0.70679	0.000291443	0.00141011	575	ENSG00000081721	+	DUSP12	505.346	-0.880841
chr1	166875833	166876263	166876199	166876375	299	-1.04355	9.67265e-17	1.79082e-15	2463	166875808	166875885	13	-0.427983	0.412289	0.598339	61	ENSG00000152382	-	TADA1	639.496	-0.910212
chr1	167220293	167220535	167220487	167220555	61	-0.763448	0.0375583	0.0993662	134	167220197	167220361	23	-1.26259	0.00122232	0.00515773	140	ENSG00000272205	-	POU2F1-DT	13.8776	1.60746
chr1	167220885	167222320	167220874	167220942	381	-0.342376	0.0164984	0.0500433	1043	167222192	167222326	58	3.76651	7.14781e-19	1.49603e-17	192	ENSG00000143190	+	POU2F1	1240.98	-0.101604
chr1	167721981	167722603	167721955	167722052	1912	-0.919708	1.91044e-23	5.05956e-22	9855	167722557	167722606	9	-0.412638	0.611261	0.764046	25	ENSG00000197965	+	MPZL1	1413.73	-0.910131
chr1	167936260	167936561	167936258	167936317	21	2.37874	2.07226e-05	0.00012529	64	167936512	167936565	6	-0.356285	0.63014	0.778449	30	ENSG00000143164	+	DCAF6	1411.29	-0.552934
chr1	167936695	167937501	167936668	167936757	1145	-0.295161	0.00580829	0.0204162	3927	167937455	167937570	11	0.161196	0.807408	0.895324	37	ENSG00000143164	+	DCAF6	1411.29	-0.552934
chr1	169794780	169794906	169794843	169795024	188	-0.266412	0.0446295	0.114483	1619	169794710	169794830	6	-1.42865	0.00778383	0.0263026	74	ENSG00000171806	-	METTL18	503.978	-0.348619
chr1	169893742	169893895	169893847	169893936	213	-0.0211545	0.858833	0.925764	1768	169893738	169893795	10	0.691513	0.473176	0.65257	18	ENSG00000000457	-	SCYL3	759.714	0.218575
chr1	172533149	172533495	172532983	172533209	609	0.115787	0.256779	0.434047	6542	172533440	172533518	21	1.06485	0.0186225	0.0554561	80	ENSG00000094975	+	SUCO	5077.79	0.201397
chr1	173477334	173477726	173477297	173477387	3435	-0.277099	0.000156316	0.000799707	12899	173477673	173477734	3	0.0421599	0.957877	0.978575	25	ENSG00000117592	+	PRDX6	5765.74	-0.298061
chr1	173824185	173824403	173824340	173824412	264	-2.46846	1.38107e-59	1.1889e-57	1610	173824180	173824252	10	-4.06114	0.000236042	0.00116262	46	ENSG00000120334	-	CENPL	657.825	-1.89533
chr1	173824672	173824878	173824571	173824732	937	-2.28232	2.82929e-107	6.42949e-105	6699	173824816	173824899	27	-1.5635	4.0754e-06	2.78106e-05	198	ENSG00000117593	+	DARS2	3242.97	-2.30977
chr1	173868379	173868736	173868194	173868496	57	1.18833	3.63545e-09	3.69872e-08	589	173868674	173868740	7	1.3551	0.0291907	0.0807613	44	ENSG00000185278	+	ZBTB37	745.066	0.485696
chr1	173868748	173868981	173868882	173869014	12	1.45513	0.00293257	0.0112258	70	173868745	173868798	5	-3.01565	0.00278183	0.0107176	35	ENSG00000234741	-	GAS5	3798.28	-0.279419
chr1	174021745	174022353	174022273	174022383	687	0.574997	4.35069e-10	4.85403e-09	9586	174021745	174021796	15	-0.665299	0.372781	0.558937	34	ENSG00000135870	-	RC3H1	2170.71	0.737775
chr1	175021553	175023424	175023364	175023441	2829	-0.54041	5.43713e-11	6.58877e-10	12017	175021554	175021603	9	-0.11687	0.910089	0.953905	15	ENSG00000120333	-	MRPS14	987.119	-0.634563
chr1	176206381	176207234	176207016	176207269	170	-0.162785	0.19243	0.352969	2247	176206380	176206429	25	2.57805	0.000455432	0.00212065	39	ENSG00000143207	-	COP1	2053.82	-0.0794357
chr1	178093733	178094384	178094334	178094401	11	1.5624	0.0155042	0.0474825	42	178093677	178093823	100	0.511599	0.000684323	0.00306117	811	ENSG00000224687	-	RASAL2-AS1	19.5502	0.457986
chr1	178542800	178543206	178542679	178542871	34	1.33044	1.41497e-06	1.03519e-05	263	178543161	178543210	8	4.08555	0.00126935	0.00533647	17	ENSG00000213057	+	C1orf220	94.7319	0.552906
chr1	178725243	178725815	178725226	178725329	1121	0.958638	3.43718e-22	8.55106e-21	3191	178725751	178725840	136	3.80788	2.51939e-52	1.81413e-50	596	ENSG00000116191	+	RALGPS2	2719.62	0.779135
chr1	178725907	178726357	178726300	178726374	20	3.10768	1.47354e-14	2.35967e-13	167	178725894	178725990	38	2.76591	4.9851e-12	6.60948e-11	151	ENSG00000273062	-	RALGPS2-AS1	223.115	3.67276
chr1	179025893	179026165	179025872	179026069	1221	0.424713	2.68063e-05	0.000158735	6149	179026136	179026178	3	-0.262054	0.794597	0.887712	18	ENSG00000116199	+	FAM20B	4788.95	0.480472
chr1	179082069	179082521	179082034	179082141	4996	-0.533669	3.90529e-11	4.78737e-10	17738	179082468	179082526	6	0.017282	0.980373	0.989666	35	ENSG00000186283	+	TOR3A	3983.26	-0.557018
chr1	179882296	179882671	179882207	179882346	158	-0.487615	0.0136746	0.0427165	472	179882432	179882706	55	1.15181	2.01481e-07	1.66267e-06	379	ENSG00000143337	+	TOR1AIP1	2360.9	-0.686027
chr1	179882778	179883020	179882667	179882850	1204	-0.622361	1.08589e-09	1.16509e-08	5800	179882954	179883039	31	1.16759	0.00044477	0.00207535	162	ENSG00000143337	+	TOR1AIP1	2360.9	-0.686027
chr1	180502465	180502559	180502475	180502647	801	0.0537432	0.521623	0.694829	6239	180502461	180502516	11	0.810415	0.211536	0.37829	37	ENSG00000230124	-	ACBD6	2169.83	-0.183716
chr1	181022159	181022860	181022808	181022964	2320	1.00737	2.02493e-34	8.53762e-33	23283	181022140	181022221	19	2.58527	2.0757e-07	1.70909e-06	88	ENSG00000135823	-	STX6	5090.96	0.99027
chr1	181088699	181090004	181088690	181088751	9391	2.17799	2.45729e-87	3.85397e-85	10229	181089957	181090015	5	2.66446	0.000704741	0.00314252	35	ENSG00000162783	+	IER5	9296.25	2.37431
chr1	182391479	182391791	182391741	182391796	2294	2.23574	8.36022e-117	2.25795e-114	4132	182391468	182391555	82	2.79415	1.20925e-17	2.36907e-16	218	ENSG00000135821	-	GLUL	21237.9	2.35848
chr1	182392048	182392229	182392184	182392233	8	1.25007	0.125448	0.2571	25	182391909	182392072	8	0.421625	0.385115	0.571601	72	ENSG00000135821	-	GLUL	21237.9	2.35848
chr1	182839346	182839583	182839328	182839407	2450	-0.637503	1.46809e-13	2.19153e-12	11780	182839522	182839589	18	0.801213	0.16032	0.309277	49	ENSG00000135829	+	DHX9	10998.2	-0.626448
chr1	183023431	183024042	183023413	183023510	181	0.753911	3.70627e-08	3.33952e-07	1235	183023788	183024050	11	3.98543	1.04315e-08	1.0046e-07	78	ENSG00000135862	+	LAMC1	6626.03	1.11045
chr1	183471291	183471996	183471960	183472008	12	-0.235724	0.665812	0.804297	57	183471179	183471349	14	-0.913095	0.041635	0.10816	97	ENSG00000232860	-	SMG7-AS1	17.3939	1.96741
chr1	183472106	183472264	183472212	183472272	6	1.38425	0.0673828	0.158981	30	183472032	183472152	14	0.566771	0.217724	0.385972	80	ENSG00000232860	-	SMG7-AS1	17.3939	1.96741
chr1	183472506	183472906	183472380	183472559	2397	-0.609775	1.65882e-11	2.1002e-10	10659	183472848	183472911	41	2.3095	3.02444e-09	3.10473e-08	132	ENSG00000116698	+	SMG7	5100.27	-0.0866189
chr1	184051732	184052112	184051631	184051806	1079	-0.828581	7.54027e-16	1.31509e-14	3089	184052067	184052114	8	-1.02478	0.351094	0.536661	15	ENSG00000198860	+	TSEN15	785.552	-1.07035
chr1	184387060	184387301	184386927	184387200	3811	-0.0642018	0.465292	0.645273	16196	184387251	184387320	73	0.073899	0.73458	0.850012	475	ENSG00000116667	+	C1orf21	2042.3	-0.175982
chr1	185316335	185317242	185317191	185317354	1660	-0.836922	1.95257e-19	4.21615e-18	6527	185316324	185316406	30	-1.24312	0.000233852	0.0011523	182	ENSG00000116679	-	IVNS1ABP	3705.69	-0.869131
chr1	186374581	186375227	186375074	186375290	1153	-0.302847	0.000219611	0.00108943	9858	186374576	186374630	15	-1.79669	0.0298494	0.0822714	34	ENSG00000047410	-	TPR	11106.1	-0.441738
chr1	186375441	186375610	186375562	186375764	78	-0.132298	0.421903	0.607008	710	186375438	186375603	11	0.459266	0.248216	0.423501	115	ENSG00000047410	-	TPR	11106.1	-0.441738
chr1	193059634	193060056	193059603	193059702	1059	-0.270703	0.00178315	0.00722284	6430	193060005	193060097	25	0.222013	0.357601	0.543171	286	ENSG00000116747	+	RO60	2228.19	-0.139234
chr1	197902622	197902836	197902613	197902678	436	-0.474017	6.72293e-05	0.000371021	2131	197902816	197902896	7	0.766678	0.149444	0.293199	62	ENSG00000203724	+	C1orf53	127.777	-0.584882
chr1	198157032	198157581	198157006	198157097	1234	0.27113	0.000741232	0.00328755	9939	198157535	198157596	55	1.08429	0.00300147	0.0114619	134	ENSG00000151414	+	NEK7	2714.86	0.13259
chr1	200669485	200669711	200669402	200669549	153	3.46657	5.65131e-64	5.41041e-62	776	200669658	200669727	16	0.37027	0.405998	0.592607	81	ENSG00000260088	+	DDX59-AS1	45.8256	3.73169
chr1	200669622	200669888	200669815	200669987	391	0.770334	7.43122e-15	1.21439e-13	4459	200669618	200669681	107	1.13907	1.45702e-06	1.06383e-05	351	ENSG00000118197	-	DDX59	1236.05	0.754396
chr1	200891015	200891247	200891013	200891067	3	-1.73927	0.156288	0.303305	16	200891193	200891255	12	-2.01597	0.00377783	0.0140237	52	ENSG00000163362	+	INAVA	120.132	-0.944954
chr1	201399490	201399531	201399492	201399583	950	-0.67281	1.70958e-11	2.16187e-10	3928	201399376	201399574	87	0.0717098	0.76189	0.867567	309	ENSG00000159166	-	LAD1	2678.22	-0.276833
chr1	201399632	201399914	201399632	201399710	12	-0.55901	0.344991	0.530713	50	201399867	201399919	12	1.96611	0.0377529	0.0997929	20	ENSG00000282221	+	ENSG00000282221	22.6036	-0.29238
chr1	201468546	201469133	201469068	201469259	9756	2.58887	1.66609e-222	2.2007e-219	30998	201468539	201468650	24	1.5734	1.46483e-08	1.38296e-07	245	ENSG00000174307	-	PHLDA3	17180.1	2.51038
chr1	201506854	201507122	201507072	201507127	10065	-0.787717	3.41769e-15	5.71662e-14	14625	201506854	201506903	7	-1.64403	0.0711877	0.166044	26	ENSG00000159176	-	CSRP1	7996.28	-0.974255
chr1	201648190	201650526	201648166	201648238	7	-1.79829	0.00177612	0.00719814	67	201650473	201650542	15	-1.9005	0.000332183	0.00158777	83	ENSG00000134369	+	NAV1	116.65	-0.0341793
chr1	201739301	201739800	201739294	201739430	158	0.897216	2.89743e-06	2.0236e-05	479	201739650	201739817	28	1.19114	0.00331318	0.0124976	103	ENSG00000134369	+	NAV1	116.65	-0.0341793
chr1	201739899	201740307	201739740	201739952	3423	0.807201	2.36799e-19	5.09106e-18	7154	201740244	201740309	18	2.51996	1.54033e-07	1.28758e-06	95	ENSG00000134369	+	NAV1	116.65	-0.0341793
chr1	201829196	201829535	201829484	201829552	12	-1.49658	0.00058539	0.00266071	113	201829165	201829252	782	-1.2248	1.29313e-38	6.23236e-37	5391	ENSG00000231871	-	IPO9-AS1	17.9334	-0.488498
chr1	201982647	201983316	201982619	201982711	2622	0.0909125	0.287694	0.468803	8036	201983265	201983323	6	1.11566	0.0462338	0.117844	50	ENSG00000176393	+	RNPEP	4190.4	0.0885968
chr1	202005810	202008278	202005808	202005850	11	-0.159152	0.854677	0.923677	22	202008203	202008286	12	0.980127	0.0289834	0.0802799	81	ENSG00000163435	+	ELF3	5146.72	0.366703
chr1	202009767	202010418	202010337	202010529	401	0.933817	3.06528e-14	4.8013e-13	1599	202009765	202009818	10	0.0418607	0.959521	0.979514	25	ENSG00000234678	-	ELF3-AS1	316.533	0.839795
chr1	202808121	202808420	202808370	202808534	10588	1.00137	2.15431e-37	1.00285e-35	20026	202808120	202808173	6	5.24133	1.51984e-05	9.43049e-05	21	ENSG00000117139	-	KDM5B	12769.5	1.05429
chr1	202810953	202811977	202810915	202811012	1306	2.19452	1.87257e-92	3.19152e-90	3884	202811930	202811982	6	2.69769	0.0169126	0.0511282	18	ENSG00000228288	+	PCAT6	360.169	2.32061
chr1	202861003	202861525	202861477	202861646	3317	-0.268658	0.00411412	0.0151082	5555	202861004	202861051	3	0.294158	0.710809	0.834861	27	ENSG00000214796	-	TUBA5P	935.137	-0.145458
chr1	202861734	202861751	202861728	202861802	17	-1.56238	0.0020421	0.00814913	94	202861705	202861755	21	-0.843592	0.140516	0.280189	58	ENSG00000234996	+	ACTG1P25	71.8886	-0.242978
chr1	202888904	202889121	202889069	202889153	2786	0.297076	0.00037905	0.00179093	21162	202888863	202888964	26	1.69151	1.32062e-06	9.70616e-06	178	ENSG00000183155	-	RABIF	2569.7	0.194635
chr1	203305518	203306649	203305510	203305567	16463	2.96513	1.58535e-151	7.09096e-149	26535	203306603	203306671	16	4.94828	5.50047e-06	3.67521e-05	48	ENSG00000159388	+	BTG2	12049	3.36253
chr1	203795634	203795987	203795515	203795688	386	-0.0250017	0.787988	0.883993	3745	203795938	203795997	15	-1.43139	0.0131967	0.041455	60	ENSG00000058673	+	ZC3H11A	15.1831	-0.683586
chr1	204377800	204378166	204377798	204377849	4	-0.6985	0.449511	0.630988	22	204378096	204378188	59	-0.309347	0.121752	0.251654	476	ENSG00000226330	+	ENSG00000226330	4.17591	1.1324
chr1	204411380	204411816	204411765	204411901	4267	0.352968	1.6899e-05	0.000104017	9510	204411375	204411461	78	-1.5914	6.1574e-08	5.3968e-07	269	ENSG00000158615	-	PPP1R15B	6355.55	0.561221
chr1	204494107	204494804	204494527	204494824	943	0.5578	2.07391e-08	1.92554e-07	3950	204494090	204494176	18	1.27587	0.000389135	0.00183366	136	ENSG00000133056	-	PIK3C2B	2454.09	0.588943
chr1	204516412	204516613	204516378	204516594	498	0.401673	4.73125e-05	0.00026834	4266	204516562	204516615	11	1.01924	0.192101	0.35254	28	ENSG00000198625	+	MDM4	6509.71	2.13497
chr1	205631562	205631978	205631931	205632018	949	0.470051	8.11741e-06	5.27248e-05	6700	205631530	205631628	13	-1.04984	0.0149602	0.0460853	108	ENSG00000158711	-	ELK4	3629.88	0.225241
chr1	205680152	205680506	205680450	205680527	38	-0.020478	0.943409	0.971296	198	205680146	205680204	7	1.90844	0.0206911	0.0605241	27	ENSG00000158715	-	SLC45A3	378.07	0.615327
chr1	205749722	205750181	205750121	205750296	17722	-0.86876	2.10758e-25	6.11205e-24	57819	205749666	205749848	36	-0.275695	0.270812	0.44986	287	ENSG00000069275	-	NUCKS1	32567.3	-0.960545
chr1	205813346	205813758	205813321	205813424	353	-0.164847	0.177768	0.333293	1801	205813711	205813768	180	-0.585811	0.00787247	0.0265534	396	ENSG00000286619	+	ENSG00000286619	389.389	-0.0938198
chr1	206684904	206685948	206684887	206684973	4201	1.09225	1.84175e-21	4.40311e-20	13696	206685866	206685969	47	1.86799	1.86984e-07	1.54757e-06	146	ENSG00000162889	+	MAPKAPK2	10314	0.988789
chr1	207868453	207869165	207869094	207869195	32	0.383793	0.228923	0.399617	185	207868449	207868507	15	1.17305	0.0933999	0.205429	41	ENSG00000203709	-	MIR29B2CHG	219.462	2.4106
chr1	210232801	210233882	210232717	210232934	128	0.172676	0.274213	0.45357	832	210233714	210233907	91	2.10952	7.69107e-35	3.28702e-33	848	ENSG00000082497	+	SERTAD4	364.866	0.190091
chr1	210328952	210329274	210328899	210329056	212	3.22679	1.34644e-112	3.37752e-110	1852	210329229	210329280	9	3.19145	0.000476094	0.00220786	31	ENSG00000054392	+	HHAT	838.289	3.53462
chr1	210329302	210329393	210329284	210329455	74	3.36506	4.5344e-26	1.35785e-24	305	210329347	210329400	4	3.33949	0.00151354	0.00624464	25	ENSG00000054392	+	HHAT	838.289	3.53462
chr1	211259552	211259733	211259255	211259604	260	-0.766762	5.43402e-09	5.4171e-08	1738	211259685	211259749	7	-0.88504	0.132161	0.267404	52	ENSG00000117625	+	RCOR3	581.839	-0.754392
chr1	211259826	211260886	211259812	211259874	13	-0.908371	0.226808	0.396974	32	211260838	211260913	7	-0.212265	0.710831	0.834861	54	ENSG00000117625	+	RCOR3	581.839	-0.754392
chr1	211326832	211327667	211326806	211326894	143	-0.165015	0.431084	0.614962	438	211327617	211327668	10	1.06697	0.134703	0.271325	31	ENSG00000082512	+	TRAF5	503.714	-0.426569
chr1	211577952	211579160	211579023	211579208	237	1.17714	1.54649e-14	2.47228e-13	1042	211577936	211577996	6	-0.377278	0.580007	0.740502	36	ENSG00000170385	-	SLC30A1	2382.25	1.58994
chr1	212285409	212286175	212285385	212285672	365	-0.385328	0.000228099	0.00112711	2352	212286128	212286177	10	0.761655	0.333379	0.519293	25	ENSG00000066027	+	PPP2R5A	1854.57	-0.371592
chr1	218345335	218345805	218345330	218345388	1279	-0.500587	1.01127e-05	6.45731e-05	3549	218345751	218345806	3	1.05107	0.181869	0.338668	26	ENSG00000092969	+	TGFB2	741.919	-0.51379
chr1	222711486	222712473	222712407	222712508	562	-1.69956	1.15364e-58	9.66544e-57	3839	222711484	222711535	4	-2.45777	0.0794134	0.181041	17	ENSG00000186063	-	AIDA	503.692	-1.75863
chr1	222712563	222713258	222712530	222712616	354	0.276845	0.0161844	0.0492144	2164	222713210	222713259	5	-0.854139	0.317281	0.502607	24	ENSG00000162819	+	BROX	2113.38	0.00542364
chr1	224434684	224434767	224434728	224434821	711	0.697343	1.43068e-09	1.51845e-08	4497	224434679	224434725	9	-1.50044	0.228855	0.399514	14	ENSG00000162923	-	WDR26	5394.22	0.634186
chr1	225777845	225778251	225777809	225777896	4227	-0.0887093	0.290121	0.471596	17036	225778201	225778274	13	-0.238153	0.603501	0.757995	87	ENSG00000143742	+	SRP9	4902.07	-0.259448
chr1	225881893	225882368	225882297	225882401	392	-0.0966309	0.422709	0.607681	1910	225881884	225881942	3	0.82684	0.269145	0.448068	30	ENSG00000196187	-	TMEM63A	1695.93	-0.0412698
chr1	226061837	226062494	226061826	226061889	21	-0.810901	0.0762658	0.175437	93	226062442	226062506	38	1.64916	1.40852e-05	8.79529e-05	118	ENSG00000163041	+	H3-3A	554.945	0.0348014
chr1	226186755	226186898	226186847	226186904	7	0.185573	0.813823	0.899183	26	226186735	226186829	17	0.332879	0.433055	0.616765	106	ENSG00000182827	-	ACBD3	3287.08	0.43009
chr1	226308587	226309163	226309100	226309305	157	-0.636095	0.000747201	0.00331126	534	226308568	226308646	23	-1.24875	0.00377709	0.0140216	104	ENSG00000183814	-	LIN9	328.606	-0.841529
chr1	226309215	226309441	226309396	226309456	4	-1.59788	0.0656573	0.155756	30	226309186	226309281	32	-0.747582	0.00265693	0.0102983	349	ENSG00000183814	-	LIN9	328.606	-0.841529
chr1	226548763	226549922	226548748	226548833	38	5.44008	3.49936e-15	5.84743e-14	169	226549875	226549923	9	2.87665	0.011415	0.0365314	19	ENSG00000203685	+	STUM	231.768	5.34904
chr1	227318453	227318491	227318094	227318511	202	0.00595403	0.965044	0.982495	1189	227318454	227318514	4	1.62147	0.0480954	0.121643	26	ENSG00000143776	-	CDC42BPA	1376.62	0.356576
chr1	227946842	227947931	227947882	227947944	436	1.17754	4.80886e-13	6.91128e-12	734	227946843	227946890	6	0.782851	0.260543	0.438279	35	ENSG00000143816	-	WNT9A	500.476	1.17106
chr1	228102943	228103324	228103252	228103467	521	-0.91463	1.04969e-22	2.67845e-21	6407	228102943	228102991	11	-0.295742	0.756479	0.864337	18	ENSG00000143793	-	C1orf35	1203.8	-1.09634
chr1	228165803	228165997	228165797	228165854	707	0.102712	0.476291	0.655505	995	228165895	228166066	49	1.84181	8.70347e-19	1.81221e-17	538	ENSG00000181873	+	IBA57	697.561	0.329254
chr1	228213178	228213663	228213597	228213685	28	-1.26244	0.00297154	0.0113594	126	228213171	228213255	15	-1.56528	0.00482131	0.017336	73	ENSG00000162913	-	OBSCN-AS1	39.3579	-0.863605
chr1	228457619	228457867	228457819	228457880	5078	0.28305	0.000640431	0.00288252	14807	228457586	228457642	4	-1.00853	0.172191	0.325915	40	ENSG00000181218	-	H2AW	1557.57	0.965963
chr1	228487393	228487802	228487359	228487476	2566	0.410187	1.97139e-05	0.000119714	10106	228487801	228487852	5	1.70602	0.0697261	0.163274	21	ENSG00000168159	+	RNF187	5632	0.322981
chr1	228735478	228736401	228735393	228735539	132	0.768257	5.48826e-07	4.26352e-06	974	228736355	228736403	13	3.73448	0.000143342	0.000740005	33	ENSG00000116574	+	RHOU	937.422	0.782671
chr1	230642504	230642749	230642413	230642559	393	-0.156312	0.153021	0.298659	2325	230642684	230642753	9	2.4911	6.01549e-05	0.000334997	57	ENSG00000135775	+	COG2	1305.74	-0.169099
chr1	230747444	230748297	230747379	230747460	471	1.222	8.98651e-24	2.42015e-22	1548	230748250	230748299	9	3.71395	0.00660462	0.0228346	13	ENSG00000135773	+	CAPN9	782.961	1.08646
chr1	232629338	232630125	232630049	232630145	835	0.908413	1.60016e-20	3.65794e-19	5512	232629336	232629391	7	-2.67424	0.0348439	0.0934476	19	ENSG00000116991	-	SIPA1L2	1779.79	0.719309
chr1	232630290	232630709	232630663	232630710	7	-1.23402	0.109862	0.232722	33	232630282	232630357	28	1.52426	1.19473e-06	8.84317e-06	182	ENSG00000116991	-	SIPA1L2	1779.79	0.719309
chr1	232950610	232951422	232950577	232950682	1028	0.68351	1.53281e-12	2.1204e-11	4762	232951383	232951451	35	3.41775	1.00498e-09	1.08185e-08	90	ENSG00000135778	+	NTPCR	1053.77	0.739755
chr1	233179835	233181094	233181045	233181109	37	5.84329	3.84746e-11	4.72333e-10	133	233179832	233179885	12	5.45082	5.0158e-06	3.37243e-05	24	ENSG00000135749	-	PCNX2	652.617	1.32802
chr1	233614105	233615055	233613971	233614200	152	-0.0295934	0.841494	0.916122	1100	233615008	233615077	27	1.06508	0.0246789	0.0702468	75	ENSG00000135750	+	KCNK1	967.543	-0.155899
chr1	234356978	234357164	234357011	234357167	519	0.593841	0.000157394	0.000804634	851	234356975	234357025	35	0.985409	0.0108324	0.034926	118	ENSG00000235605	-	ENSG00000235605	9225.62	0.168713
chr1	234373455	234373651	234373448	234373603	1595	-0.108304	0.270852	0.4499	7578	234373601	234373672	44	1.78931	3.29061e-07	2.63648e-06	148	ENSG00000168275	+	COA6	607.213	-0.102943
chr1	234609437	234609497	234609267	234609608	95	0.678247	4.86138e-05	0.000275185	743	234609438	234609489	8	3.46336	0.00065467	0.0029405	28	ENSG00000168264	-	IRF2BP2	4889.95	1.2253
chr1	234609599	234610177	234610101	234610197	1132	1.07027	1.69028e-15	2.88374e-14	3713	234609595	234609646	5	2.81805	0.00973149	0.0318923	19	ENSG00000168264	-	IRF2BP2	4889.95	1.2253
chr1	234962261	234964197	234964149	234964199	8	0.859015	0.470127	0.649659	12	234962257	234962308	5	0.963317	0.252164	0.428437	22	ENSG00000238005	-	ENSG00000238005	43.2676	1.79435
chr1	235073785	235074169	235074162	235074222	8	2.9179	0.00185591	0.00748349	27	235073783	235073909	20	2.05711	3.26287e-08	2.96177e-07	152	ENSG00000280587	-	LINC01348	201.562	2.59238
chr1	235074208	235075489	235075439	235075494	91	3.12089	1.54881e-13	2.30876e-12	150	235074195	235074257	25	2.66095	6.2202e-08	5.44789e-07	92	ENSG00000280587	-	LINC01348	201.562	2.59238
chr1	235327249	235328167	235328102	235328206	763	0.231503	0.0367996	0.0977222	2479	235327234	235327299	6	5.45471	1.36842e-06	1.00348e-05	42	ENSG00000054267	-	ARID4B	2646.94	0.216206
chr1	235328569	235328820	235328564	235328640	2648	-0.226105	0.0193529	0.0572607	7022	235328769	235328822	4	-0.779661	0.407289	0.593815	20	ENSG00000152904	+	GGPS1	431.775	-0.158041
chr1	236523768	236523947	236523734	236523816	192	1.30492	2.31807e-08	2.14117e-07	340	236523824	236523951	7	-0.0645967	0.913749	0.956035	50	ENSG00000116977	+	LGALS8	1625.73	-0.147369
chr1	236523981	236524530	236523900	236524057	130	-0.524908	0.000300822	0.00145119	1145	236524462	236524556	44	0.808562	0.00414666	0.0152165	202	ENSG00000116977	+	LGALS8	1625.73	-0.147369
chr1	241847985	241848124	241847963	241848053	49	-1.78939	1.34036e-05	8.39633e-05	135	241848048	241848138	10	1.9088	1.67161e-05	0.000102982	95	ENSG00000174371	+	EXO1	686.714	-3.50886
chr1	243255330	243255489	243255442	243255493	9	-1.46205	0.0909402	0.201181	28	243255324	243255382	5	-1.20241	0.223734	0.393189	20	ENSG00000143702	-	CEP170	416.869	-1.27386
chr1	244451241	244451880	244451775	244452083	1058	-0.161073	0.0731681	0.169764	8416	244451242	244451290	13	-1.40679	0.185645	0.343707	18	ENSG00000035687	-	ADSS2	1453.33	-0.169041
chr1	244461315	244461372	244461310	244461577	8	1.02194	0.027262	0.0763244	82	244461173	244461467	62	-0.299879	0.300696	0.483717	230	ENSG00000179397	+	CATSPERE	6.48188	-0.0490019
chr1	244835045	244835286	244835103	244835311	11	-0.432023	0.291871	0.473582	116	244834955	244835202	17	-0.224497	0.524974	0.697611	143	ENSG00000287601	-	ENSG00000287601	12.204	1.84128
chr1	244862684	244862999	244862949	244863106	9	-1.0007	0.00461017	0.0166792	155	244862678	244862733	3	-0.898431	0.311539	0.496217	24	ENSG00000153187	-	HNRNPU	27039.6	-0.223545
chr1	244864022	244864482	244864385	244864551	20657	-0.167916	0.0490272	0.123578	95188	244864019	244864084	150	-0.547983	0.0014196	0.00589138	983	ENSG00000153187	-	HNRNPU	27039.6	-0.223545
chr1	244970404	244970631	244970303	244970452	135	-1.38381	4.17392e-18	8.37519e-17	937	244970562	244970661	27	0.240647	0.423698	0.608353	182	ENSG00000203666	+	EFCAB2	236.491	-1.17295
chr1	244970847	244971087	244970938	244971110	26	0.600997	0.113662	0.238869	118	244970831	244970951	25	0.367299	0.28308	0.463419	134	ENSG00000272195	-	ENSG00000272195	31.6549	1.56853
chr1	245154494	245156599	245154493	245154545	3	5.28519	1.80527e-05	0.000110435	22	245156554	245156601	12	2.78525	0.00372665	0.0138569	25	ENSG00000162849	+	KIF26B	93.1561	4.80278
chr1	246724411	246724732	246724279	246724489	2470	0.198551	0.0133329	0.0418183	20920	246724681	246724798	254	2.58228	4.77674e-41	2.48649e-39	739	ENSG00000143653	+	SCCPDH	5274.9	0.269653
chr1	247331806	247331866	247331792	247331895	281	-0.897555	3.70241e-14	5.76935e-13	2302	247331806	247331859	11	-1.09806	0.163513	0.313753	31	ENSG00000162714	-	ZNF496	1085.96	-0.913354
chr1	248838246	248838631	248838217	248838474	441	0.361469	0.000308361	0.00148424	3389	248838580	248838652	45	1.42955	2.14554e-05	0.000129332	170	ENSG00000171161	+	ZNF672	1509.71	0.284112
chr1	248858166	248859084	248858854	248859100	446	-0.160958	0.226765	0.396932	1473	248858164	248858244	19	-0.835594	0.0432606	0.111561	104	ENSG00000171163	-	ZNF692	1063.29	-0.301729
chr10	134986	135319	134835	135161	786	0.522552	7.63962e-08	6.60959e-07	4559	135277	135330	9	-1.54044	0.00802738	0.0270058	63	ENSG00000015171	+	ZMYND11	6875.28	-0.205178
chr10	135454	136012	135435	135526	949	-0.3444	0.000395116	0.0018605	5840	135949	136017	21	1.70564	0.00202346	0.00808505	68	ENSG00000015171	+	ZMYND11	6875.28	-0.205178
chr10	688787	689886	689584	689918	345	0.159918	0.122897	0.253409	3131	688787	688836	8	1.80402	0.0152697	0.0468749	32	ENSG00000151240	-	DIP2C	1979.11	0.200393
chr10	930892	931699	931617	931788	1956	0.0437925	0.587105	0.745793	14064	930861	930943	28	2.76964	1.3616e-11	1.74005e-10	142	ENSG00000107929	-	LARP4B	7772.24	0.214636
chr10	987731	988328	988265	988362	43	0.64898	0.00888055	0.0294668	286	987730	987792	22	5.6819	3.36832e-07	2.69568e-06	49	ENSG00000205740	-	ENSG00000205740	58.2283	1.07806
chr10	1049094	1049117	1049069	1049125	1651	0.931978	3.48326e-18	7.02436e-17	2474	1049059	1049145	440	1.94331	8.6567e-49	5.6817e-47	1510	ENSG00000067064	-	IDI1	7327.64	-0.134281
chr10	1056411	1056703	1056377	1056462	1312	2.24502	2.97985e-103	6.12907e-101	3674	1056636	1056740	279	0.116112	0.344359	0.53004	1391	ENSG00000047056	+	WDR37	2320.06	0.935619
chr10	3067547	3068982	3067511	3067598	10169	-0.43506	1.79306e-09	1.88436e-08	16561	3068930	3068991	5	4.10651	0.000341414	0.00162739	28	ENSG00000067057	+	PFKP	8852.49	-0.386506
chr10	4826279	4826624	4826171	4826345	342	-0.529251	2.0781e-05	0.000125607	1811	4826558	4826627	16	0.182508	0.696194	0.825017	81	ENSG00000165568	+	AKR1E2	393.884	-0.738013
chr10	5813014	5813433	5813381	5813454	21037	-0.163563	0.047361	0.120131	54328	5812990	5813069	45	-1.46523	2.80566e-07	2.26923e-06	278	ENSG00000057608	-	GDI2	12663.1	-0.178536
chr10	6202931	6204391	6202927	6202978	3187	1.49819	7.49025e-46	4.52606e-44	4346	6204344	6204392	9	5.27731	3.85005e-06	2.63686e-05	36	ENSG00000170525	+	PFKFB3	5521.59	1.01861
chr10	7818507	7819264	7818493	7818575	209	0.720981	2.57185e-08	2.36268e-07	1496	7819107	7819269	33	2.68758	3.75021e-11	4.60863e-10	135	ENSG00000165632	+	TAF3	3067.5	0.690878
chr10	8045377	8045620	8045152	8045438	705	-1.55452	4.88294e-75	6.16096e-73	6078	8045504	8045626	53	0.766421	0.0506311	0.126831	107	ENSG00000107485	+	GATA3	58040.2	0.653829
chr10	8051239	8051862	8051230	8051374	911	-0.466423	2.21672e-06	1.57672e-05	6328	8051810	8051916	526	1.81773	1.59685e-69	1.76229e-67	3307	ENSG00000232638	+	ENSG00000232638	1350.85	-0.314276
chr10	8052098	8052963	8052915	8052965	7	5.03591	4.82236e-05	0.000273123	18	8052062	8052226	584	0.805308	4.04546e-10	4.52843e-09	1318	ENSG00000197308	-	GATA3-AS1	5778.13	1.0718
chr10	8052908	8053453	8053401	8053492	1576	2.26068	1.80101e-133	6.04168e-131	11132	8052901	8052948	7	-0.115783	0.89189	0.943853	22	ENSG00000197308	-	GATA3-AS1	5778.13	1.0718
chr10	8054687	8055779	8054668	8054740	94430	0.564599	2.4075e-11	3.00755e-10	150158	8055733	8055783	19	0.557542	0.458388	0.63918	30	ENSG00000107485	+	GATA3	58040.2	0.653829
chr10	8058361	8058609	8058348	8058427	181	0.347635	0.0693221	0.162495	491	8058470	8058667	15	0.622603	0.078856	0.180089	136	ENSG00000107485	+	GATA3	58040.2	0.653829
chr10	11611073	11611589	11611524	11611805	492	0.571515	8.14357e-10	8.84523e-09	6567	11611067	11611121	9	3.28281	0.00826549	0.0276945	17	ENSG00000148429	-	USP6NL	1873.59	0.631063
chr10	12195944	12196126	12196066	12196153	150	0.212251	0.131883	0.266975	1317	12195927	12196013	53	0.212133	0.321005	0.506641	389	ENSG00000165609	-	NUDT5	2479.72	-0.250901
chr10	12349575	12350694	12349438	12349726	229	2.79603	3.96506e-97	7.33458e-95	2085	12350645	12350697	92	4.99622	8.81311e-15	1.43412e-13	149	ENSG00000183049	+	CAMK1D	685.923	2.82827
chr10	13348094	13348212	13348162	13348318	1751	-1.92155	1.17e-100	2.31092e-98	5896	13348064	13348141	10	0.747833	0.145046	0.286861	66	ENSG00000086475	-	SEPHS1	2823.91	-0.902346
chr10	13348417	13348541	13348495	13348600	8	0.981723	0.137023	0.274845	39	13348282	13348550	64	-2.36669	1.08861e-21	2.63461e-20	486	ENSG00000086475	-	SEPHS1	2823.91	-0.902346
chr10	14959390	14959938	14959365	14959442	88	0.0361392	0.879542	0.937388	303	14959892	14959942	6	-0.943031	0.342368	0.528165	18	ENSG00000197889	+	MEIG1	14.7616	-0.22307
chr10	15097182	15097302	15097083	15097245	176	-0.30851	0.0087999	0.0292394	1826	15097255	15097332	26	2.11762	5.56274e-07	4.3182e-06	107	ENSG00000152464	+	RPP38	763.607	-0.258474
chr10	17454185	17454591	17454435	17454609	110	-0.18004	0.417184	0.602998	489	17454176	17454232	9	-0.473552	0.590142	0.747883	23	ENSG00000148488	-	ST8SIA6	224.325	0.100046
chr10	18659430	18659800	18659329	18659492	415	-0.555408	1.31502e-08	1.24935e-07	4660	18659743	18659805	7	0.711492	0.278288	0.458205	42	ENSG00000165997	+	ARL5B	1731.19	-0.263337
chr10	21173958	21174090	21173959	21174030	10	3.07968	7.75902e-05	0.000422899	44	21174035	21174127	5367	1.13848	3.83211e-46	2.33731e-44	14385	ENSG00000231920	+	NEBL-AS1	53.8688	0.953792
chr10	21174278	21174326	21174266	21174351	140	0.185452	0.240914	0.414213	860	21174174	21174362	99	0.855834	1.70593e-06	1.23353e-05	643	ENSG00000078114	-	NEBL	4818.98	0.956524
chr10	21496006	21497259	21497209	21497296	69	1.66907	1.27932e-09	1.3619e-08	260	21496005	21496053	15	1.0642	0.11197	0.236106	36	ENSG00000204682	-	MIR1915HG	394.798	1.61358
chr10	21526047	21526380	21526332	21526399	5	-0.417	0.57349	0.735623	35	21526028	21526182	17	0.622641	0.126251	0.258275	100	ENSG00000180592	-	SKIDA1	132.492	0.085647
chr10	21534235	21535008	21534215	21534514	192	-0.851684	3.98295e-10	4.46141e-09	1560	21534957	21535033	8	-0.0870997	0.82266	0.904396	113	ENSG00000078403	+	MLLT10	1152.27	-0.552986
chr10	22321470	22321824	22321070	22321524	347	-1.04226	8.03981e-34	3.30249e-32	6452	22321773	22321908	11	1.08845	0.0592004	0.143632	58	ENSG00000168283	+	BMI1	1649.08	-0.729232
chr10	22340420	22341019	22340971	22341026	24	0.725259	0.129464	0.263161	69	22340399	22340492	26	0.343124	0.270225	0.449299	182	ENSG00000272366	-	ENSG00000272366	1.33041	-0.43306
chr10	22713203	22714573	22714490	22714602	1300	-0.448168	3.51221e-06	2.41979e-05	20211	22713199	22713251	7	0.0448592	0.967928	0.98379	14	ENSG00000150867	-	PIP4K2A	3041.35	-0.593649
chr10	23439141	23439984	23438993	23439194	437	1.07773	9.37333e-17	1.73768e-15	2246	23439937	23439987	8	2.6833	0.0165005	0.0500453	18	ENSG00000165312	+	OTUD1	769.709	1.23382
chr10	24722899	24723880	24723634	24723946	265	1.22216	6.54023e-24	1.77377e-22	1666	24722878	24722978	47	2.62374	4.40378e-12	5.86726e-11	157	ENSG00000107863	-	ARHGAP21	2959.31	1.46613
chr10	25016650	25016976	25016606	25016712	99	-0.303614	0.0356501	0.0952321	1054	25016922	25017006	26	0.65709	0.0221374	0.0640936	207	ENSG00000185875	+	THNSL1	836.789	-0.322503
chr10	27154479	27155168	27154446	27154542	98	0.113911	0.521895	0.69507	628	27155097	27155298	83	0.672128	7.38501e-05	0.000404025	655	ENSG00000120539	+	MASTL	1288.01	-2.24118
chr10	27155362	27155983	27155344	27155414	1742	-3.35179	4.41674e-166	2.59287e-163	4428	27155931	27155986	4	-0.725586	0.39738	0.584041	25	ENSG00000120539	+	MASTL	1288.01	-2.24118
chr10	27240552	27240796	27240739	27240847	131	-0.966915	3.06849e-10	3.4716e-09	993	27240550	27240600	5	0.937832	0.430942	0.614879	12	ENSG00000107897	-	ACBD5	2043.68	-0.899779
chr10	27240939	27242110	27242034	27242133	88	0.293997	0.171194	0.32461	387	27240871	27240990	16	-0.912527	0.0602098	0.145525	81	ENSG00000107897	-	ACBD5	2043.68	-0.899779
chr10	27242210	27243045	27243007	27243087	48	-1.39248	1.45084e-05	9.03952e-05	213	27242197	27242296	29	0.168894	0.591017	0.748579	165	ENSG00000107897	-	ACBD5	2043.68	-0.899779
chr10	28532441	28532662	28532597	28532762	536	-0.224567	0.0189738	0.056317	3804	28532370	28532490	7	0.485355	0.463546	0.64375	44	ENSG00000254635	-	WAC-AS1	1373.86	0.0325019
chr10	28532805	28533013	28532748	28532826	204	0.277855	0.0345977	0.0929349	1309	28532939	28533038	40	0.899852	8.19395e-07	6.20296e-06	538	ENSG00000095787	+	WAC	6608.36	0.00496752
chr10	28533130	28533287	28533111	28533313	2820	0.119983	0.175921	0.330959	15388	28533239	28533290	8	-0.679964	0.3815	0.56791	35	ENSG00000095787	+	WAC	6608.36	0.00496752
chr10	29735507	29735826	29735774	29735951	398	0.0424474	0.684527	0.817363	3601	29735398	29735521	7	0.474191	0.277977	0.457821	86	ENSG00000197321	-	SVIL	3450.83	0.484932
chr10	29735983	29737000	29736884	29737063	408	0.803744	1.8316e-16	3.32052e-15	3596	29735897	29736036	12	2.05492	7.52907e-05	0.0004114	70	ENSG00000197321	-	SVIL	3450.83	0.484932
chr10	31318416	31319062	31318992	31319076	117	-0.0620329	0.731376	0.848034	698	31318413	31318463	6	0.60323	0.548802	0.717422	15	ENSG00000237036	-	ZEB1-AS1	250.046	-0.11741
chr10	31928514	31928799	31928728	31928826	2486	-0.068538	0.412223	0.59829	9025	31928501	31928554	4	-0.999074	0.275334	0.454895	22	ENSG00000165322	-	ARHGAP12	2468.74	-0.0999158
chr10	32346714	32347155	32347009	32347163	849	0.639465	2.97266e-11	3.682e-10	7908	32346683	32346768	8	0.422247	0.531633	0.703023	36	ENSG00000120616	-	EPC1	1609.08	0.778338
chr10	33334310	33334651	33334471	33334670	266	-0.172695	0.0759416	0.174831	3185	33334297	33334362	22	2.95641	1.16362e-06	8.62496e-06	70	ENSG00000099250	-	NRP1	3946.56	0.0723121
chr10	33334782	33334865	33334819	33334974	588	-0.760689	1.87733e-11	2.36656e-10	2840	33334782	33334834	12	1.10744	0.103965	0.223185	36	ENSG00000099250	-	NRP1	3946.56	0.0723121
chr10	33335067	33335112	33335059	33335146	86	0.180719	0.343622	0.529446	486	33334984	33335116	22	0.552055	0.101071	0.218208	141	ENSG00000099250	-	NRP1	3946.56	0.0723121
chr10	33335864	33336231	33336215	33336277	11	0.834142	0.289163	0.470534	28	33335860	33335914	6	0.946869	0.342444	0.528245	17	ENSG00000099250	-	NRP1	3946.56	0.0723121
chr10	34814813	34815295	34815140	34815341	432	0.217627	0.0377706	0.0998273	3091	34814786	34814862	23	1.86908	0.000185885	0.00093619	72	ENSG00000148498	-	PARD3	2854.89	0.293456
chr10	35090265	35090583	35090440	35090645	873	0.108627	0.278566	0.458478	4730	35090264	35090293	21	0.645212	0.404712	0.591424	26	ENSG00000108094	-	CUL2	2374.42	-0.0387987
chr10	35127000	35127158	35126980	35127142	749	-0.39515	0.000203223	0.00101447	3044	35127015	35127162	21	1.55456	1.56984e-05	9.71367e-05	139	ENSG00000095794	+	CREM	859.741	0.631101
chr10	37857748	37858047	37857723	37857825	68	1.74467	3.5381e-11	4.35684e-10	261	37858001	37858075	53	0.571781	0.00594486	0.020832	474	ENSG00000236514	+	ENSG00000236514	71.0376	2.15914
chr10	38010692	38011005	38010666	38010770	978	0.590698	9.84295e-10	1.06147e-08	4026	38010959	38011027	37	1.47521	0.000230722	0.00113881	126	ENSG00000189180	+	ZNF33A	2013.32	0.610363
chr10	42638281	42638552	42638490	42638592	201	0.17517	0.168584	0.321015	1357	42638279	42638381	119	3.28858	8.68405e-64	8.27638e-62	810	ENSG00000196693	-	ZNF33B	1349.23	0.463744
chr10	43396250	43396748	43396685	43396851	616	-0.427678	2.1831e-06	1.55417e-05	3668	43396246	43396385	205	2.51334	1.27443e-56	1.00971e-54	1006	ENSG00000169813	-	HNRNPF	15808.1	-0.449341
chr10	43396952	43397234	43397181	43397362	232	0.552547	3.77445e-07	2.99997e-06	3041	43396931	43397017	25	0.0185725	0.950929	0.974988	185	ENSG00000169813	-	HNRNPF	15808.1	-0.449341
chr10	43408929	43409179	43409127	43409201	2924	-0.176715	0.0562305	0.137934	11502	43408911	43408999	18	0.165491	0.628509	0.777082	142	ENSG00000169813	-	HNRNPF	15808.1	-0.449341
chr10	43420585	43420911	43420540	43420682	38	-1.18524	2.2486e-07	1.8414e-06	437	43420900	43420958	8	-5.11135	1.50802e-05	9.36265e-05	34	ENSG00000230555	+	ENSG00000230555	162.667	0.651211
chr10	43436867	43437060	43436844	43436946	31	-0.29282	0.279436	0.459419	241	43436994	43437088	164	-0.112344	0.552127	0.719754	619	ENSG00000243660	+	ZNF487	178.187	0.339691
chr10	49538845	49539029	49538977	49539129	249	-0.140512	0.282093	0.462285	1859	49538825	49538878	6	-0.236706	0.707596	0.832659	43	ENSG00000225830	-	ERCC6	903.501	0.249302
chr10	50623509	50623922	50623849	50624037	581	0.0221891	0.807369	0.895293	4076	50623489	50623546	3	-2.0191	0.0416493	0.108181	25	ENSG00000198964	-	SGMS1	967.813	-0.387866
chr10	50624950	50625162	50624916	50625090	208	0.391087	0.0404992	0.105723	500	50625116	50625186	15	-0.59979	0.168523	0.32094	94	ENSG00000226200	+	SGMS1-AS1	184.526	0.421252
chr10	51074486	51074705	51074460	51074559	21	-0.552806	0.14552	0.287576	118	51074654	51074709	10	1.22066	0.0471448	0.119719	44	ENSG00000185532	+	PRKG1	62.0935	-0.51121
chr10	52314282	52314523	52314203	52314332	15154	-0.00782161	0.922685	0.960817	28800	52314458	52314533	20	2.2982	1.27927e-05	8.04366e-05	71	ENSG00000107984	+	DKK1	6817.95	0.0145057
chr10	52314679	52315112	52314657	52314734	194	0.856294	3.01884e-09	3.09973e-08	1304	52315055	52315119	81	1.13354	6.6531e-05	0.000367551	230	ENSG00000107984	+	DKK1	6817.95	0.0145057
chr10	52453092	52455292	52455110	52455318	19168	1.12516	2.13279e-42	1.16547e-40	45595	52453091	52453142	12	3.85745	0.00116857	0.00495391	24	ENSG00000231131	-	LNCAROD	3839.86	0.836413
chr10	60139957	60140739	60140594	60140763	256	-1.01696	6.16601e-14	9.44464e-13	1408	60139932	60140032	22	0.489484	0.115167	0.241276	179	ENSG00000151150	-	ANK3	3678.65	0.333315
chr10	61901698	61903817	61901678	61901740	23	-0.975908	0.0122156	0.0387547	124	61903673	61903823	11	0.267512	0.589748	0.74763	70	ENSG00000150347	+	ARID5B	890.838	-0.248879
chr10	62804719	62805317	62804698	62804792	1326	0.123713	0.245515	0.420012	2978	62805257	62805342	9	1.48282	0.00832566	0.027863	53	ENSG00000181915	+	ADO	1329.81	-0.341484
chr10	63465179	63465976	63465174	63465250	52	-0.644638	0.0108756	0.0350454	301	63465928	63466020	33	-0.0597302	0.829126	0.908268	225	ENSG00000272767	+	JMJD1C-AS1	55.7956	-0.410183
chr10	63521396	63521889	63521379	63521481	688	-0.364216	3.42225e-05	0.000198952	6649	63521770	63522119	139	-0.273525	0.0534309	0.132458	1230	ENSG00000165476	+	REEP3	1758.95	-0.396146
chr10	67884655	67885113	67884650	67884708	1508	0.202073	0.0420599	0.109043	3461	67885044	67885123	7	0.852701	0.17463	0.329285	44	ENSG00000096717	+	SIRT1	1467.16	0.219225
chr10	68331716	68331881	68331688	68331774	25	-0.854541	0.0520587	0.129759	92	68331842	68331935	14	0.218273	0.534312	0.705482	129	ENSG00000096746	+	HNRNPH3	10102.2	-0.486354
chr10	68332063	68332891	68332057	68332134	9979	-0.403546	7.23703e-07	5.52456e-06	29879	68332852	68332958	91	1.3036	3.03399e-08	2.76292e-07	342	ENSG00000096746	+	HNRNPH3	10102.2	-0.486354
chr10	68988802	68989262	68988779	68988867	860	-0.82003	3.65619e-15	6.09745e-14	4096	68989226	68989272	21	0.298493	0.577331	0.738507	61	ENSG00000198954	+	KIFBP	1898.16	-0.95273
chr10	69123476	69123946	69123477	69123526	10	-1.41145	0.0590784	0.143398	36	69123901	69123956	6	-0.301831	0.698091	0.826258	29	ENSG00000122958	+	VPS26A	2662.47	0.409851
chr10	69318871	69319509	69318832	69318924	1407	0.314143	0.000104909	0.000557316	10040	69319460	69319532	16	0.975293	0.0654047	0.155276	57	ENSG00000156515	+	HK1	11246.8	0.207479
chr10	69451464	69451961	69451452	69451631	2431	-1.02891	1.27194e-33	5.18193e-32	17403	69451912	69451967	36	1.00989	0.0191001	0.0566363	93	ENSG00000099282	+	TSPAN15	3530.79	-1.29423
chr10	70052845	70053991	70052824	70052926	458	-0.942199	4.5317e-15	7.5116e-14	2106	70053946	70053995	5	-1.55505	0.101009	0.218104	25	ENSG00000099284	+	MACROH2A2	782.068	-0.976876
chr10	70146108	70146614	70146586	70146748	238	0.302677	0.00236639	0.00928412	2691	70146109	70146158	7	1.55225	0.0800175	0.182112	23	ENSG00000156521	-	TYSND1	2522.08	-0.230255
chr10	70232665	70233390	70233341	70233414	4343	-0.0905975	0.234854	0.40669	31567	70232663	70232715	7	2.43872	0.0185701	0.0553229	21	ENSG00000180817	-	PPA1	1645.28	-0.177829
chr10	70887982	70888591	70888531	70888623	523	-0.628136	8.62271e-12	1.12057e-10	4135	70887974	70888035	4	-2.09795	0.0210309	0.0613609	34	ENSG00000166228	-	PCBD1	1258.31	-1.04363
chr10	72216034	72216297	72216008	72216101	2633	0.325331	7.95403e-05	0.000432607	16667	72216224	72216312	97	0.160799	0.275731	0.455364	913	ENSG00000166295	+	ANAPC16	2822.75	0.321634
chr10	72354724	72354918	72354850	72355003	973	0.260724	0.00300552	0.0114746	4385	72354687	72354745	15	1.1552	0.0663467	0.156986	43	ENSG00000148719	-	DNAJB12	2192.65	0.342194
chr10	73168118	73168322	73168107	73168282	378	0.17358	0.205664	0.37064	1182	73168270	73168327	17	2.59299	6.99881e-05	0.000385064	51	ENSG00000138286	+	FAM149B1	480.287	0.393553
chr10	73246990	73247254	73247195	73247286	4355	-1.73968	3.28795e-76	4.2306e-74	15215	73246980	73247092	10	-0.747267	0.0905252	0.200426	96	ENSG00000213551	-	DNAJC9	1756.88	-1.60556
chr10	73250255	73252630	73252558	73252651	3458	-0.316546	0.000110608	0.000584729	33792	73250237	73250294	2	-0.679517	0.806438	0.89473	10	ENSG00000182180	-	MRPS16	3347.03	-0.387479
chr10	73495752	73496015	73495854	73496031	103	-0.165782	0.260466	0.438228	990	73495735	73495817	95	0.311089	0.215424	0.383046	287	ENSG00000107758	-	PPP3CB	1752.03	-0.00436468
chr10	73744371	73744795	73744367	73744446	880	0.0905444	0.385459	0.571961	4313	73744731	73744798	11	0.6388	0.206145	0.371262	67	ENSG00000176986	+	SEC24C	6918.36	0.212274
chr10	73760012	73760776	73760012	73760060	10	0.232817	0.832906	0.910697	13	73760722	73760782	3	0.20743	0.82644	0.906669	19	ENSG00000176986	+	SEC24C	6918.36	0.212274
chr10	73772306	73772453	73772274	73772357	93	-1.11658	3.58287e-10	4.02768e-09	692	73772399	73772454	4	0.198641	0.785951	0.882809	30	ENSG00000196968	+	FUT11	395.26	-0.837624
chr10	73772495	73772973	73772481	73772775	76	-0.746252	1.31368e-06	9.65929e-06	956	73772820	73772992	51	1.07899	7.1107e-06	4.66773e-05	302	ENSG00000196968	+	FUT11	395.26	-0.837624
chr10	74825548	74826107	74825386	74825650	104	-1.68389	4.40311e-39	2.16786e-37	2042	74825951	74826141	80	0.407446	0.0786798	0.179769	332	ENSG00000156650	+	KAT6B	1809.18	-0.412632
chr10	75210169	75210436	75210153	75210221	28	1.01044	0.0118093	0.0376296	110	75210385	75210440	10	-0.343907	0.641709	0.786914	33	ENSG00000165637	+	VDAC2	459.607	0.107859
chr10	75234431	75235956	75235622	75236072	301	0.496652	8.10553e-06	5.26517e-05	2639	75234404	75234595	33	3.02674	2.99639e-20	6.75836e-19	242	ENSG00000165644	-	COMTD1	891.432	0.290521
chr10	75400152	75401389	75401336	75401413	29	1.00575	0.0140585	0.0437295	95	75400132	75400200	5	2.66838	0.00277949	0.01071	29	ENSG00000270087	-	ENSG00000270087	0.140809	1.03998
chr10	75401522	75401781	75401717	75401792	94	-0.776819	0.00626378	0.0217916	299	75401493	75401625	16	0.344425	0.327081	0.512923	146	ENSG00000165655	-	ZNF503	341.429	-0.25798
chr10	75409206	75409593	75409486	75409623	135	-0.0900018	0.633483	0.781008	550	75409203	75409254	8	-1.67345	0.0292957	0.0810014	37	ENSG00000273248	-	ENSG00000273248	7.28834	-0.218512
chr10	77926439	77926753	77926681	77926779	276	0.07306	0.611745	0.764397	1054	77926316	77926456	7	1.14954	0.0239045	0.0684109	65	ENSG00000151208	-	DLG5	8359.58	0.249305
chr10	79069042	79070812	79068924	79069054	554	1.74536	1.46144e-51	1.03298e-49	2642	79070744	79070813	10	1.70723	0.0133642	0.0418956	38	ENSG00000108175	+	ZMIZ1	7868.4	1.09254
chr10	79243450	79243832	79243294	79243511	93	0.463169	0.00552285	0.0195315	747	79243766	79243837	24	0.90766	0.0202056	0.0593628	128	ENSG00000108175	+	ZMIZ1	7868.4	1.09254
chr10	79825909	79826548	79826491	79826578	61	0.198209	0.347305	0.533019	408	79825909	79825956	14	0.892048	0.365599	0.551592	22	ENSG00000225484	-	NUTM2B-AS1	348.511	0.320075
chr10	80078664	80078959	80078657	80078742	457	-0.82127	3.41975e-11	4.21785e-10	1636	80078836	80078965	35	-2.29426	1.35211e-13	2.02304e-12	300	ENSG00000133678	+	TMEM254	466.964	-0.754426
chr10	86521088	86521770	86521694	86521799	1434	-0.0451844	0.614306	0.766278	14631	86521035	86521135	28	-0.144232	0.708969	0.83349	117	ENSG00000062650	-	WAPL	3258.12	0.000230176
chr10	86755808	86756437	86756363	86756450	40	0.276281	0.318437	0.504024	226	86755754	86755887	13	-0.135196	0.729524	0.846867	106	ENSG00000272631	-	ENSG00000272631	77.7952	0.774318
chr10	86756618	86757465	86756523	86756818	199	-0.131832	0.278463	0.458372	1853	86757415	86757494	10	0.197945	0.67166	0.808202	76	ENSG00000107779	+	BMPR1A	687.182	-0.241704
chr10	87094175	87094842	87094792	87094878	941	0.181686	0.0229771	0.0661329	6768	87094162	87094220	7	-0.54776	0.384438	0.570896	49	ENSG00000148672	-	GLUD1	2987.19	0.190956
chr10	87094304	87095007	87094930	87095041	174	0.801134	1.53934e-07	1.28688e-06	933	87094303	87094361	4	-0.348741	0.615575	0.767288	35	ENSG00000148672	-	GLUD1	2987.19	0.190956
chr10	87095205	87095616	87095094	87095256	507	-0.548237	3.03198e-05	0.000177833	1520	87095567	87095619	4	1.002	0.143276	0.284208	35	ENSG00000122376	+	SHLD2	899.441	-0.540198
chr10	87342393	87342455	87342291	87342467	238	0.257443	0.016053	0.0489082	2152	87342392	87342479	28	0.474396	0.144507	0.286071	166	ENSG00000223482	-	NUTM2A-AS1	548.458	0.377707
chr10	87659097	87659739	87659074	87659156	52	-0.595681	0.0970008	0.211646	156	87659722	87659741	9	-0.474812	0.641038	0.78645	17	ENSG00000198682	+	PAPSS2	12072.8	0.478925
chr10	87659877	87660048	87659623	87659929	9251	0.459424	1.15468e-09	1.23575e-08	19123	87659998	87660068	47	0.491216	0.143518	0.28457	152	ENSG00000198682	+	PAPSS2	12072.8	0.478925
chr10	87660185	87660930	87660138	87660233	31	0.183292	0.460307	0.640914	274	87660859	87660936	19	2.68551	3.05691e-06	2.12848e-05	71	ENSG00000198682	+	PAPSS2	12072.8	0.478925
chr10	87863353	87863546	87863480	87863548	21	2.37911	4.13865e-06	2.82149e-05	79	87863335	87863421	112	2.76289	1.50732e-27	4.79937e-26	372	ENSG00000227268	-	KLLN	396.926	2.67846
chr10	88582975	88583317	88583151	88583330	92	-0.166183	0.347582	0.533309	654	88582907	88583033	27	-0.965298	0.0036702	0.013671	176	ENSG00000184719	-	RNLS	99.0358	-0.362297
chr10	88990797	88991321	88991251	88991349	512	5.07038	2.04091e-246	3.75065e-243	4164	88990774	88990881	310	4.78189	2.67691e-167	1.59363e-164	2432	ENSG00000107796	-	ACTA2	1810.35	5.21738
chr10	88991437	88991726	88991438	88991488	6	4.14276	0.00028964	0.00140227	29	88991677	88991733	6	3.56346	0.00427701	0.015629	20	ENSG00000026103	+	FAS	2628.24	4.82526
chr10	89414567	89415029	89414542	89414644	70	-0.333482	0.306822	0.491018	183	89414981	89415037	12	-1.60387	0.0107997	0.0348445	56	ENSG00000152778	+	IFIT5	224.407	-1.09786
chr10	89414746	89415440	89414718	89414808	60	-1.54235	1.06555e-11	1.37124e-10	451	89415406	89415453	6	-1.31961	0.117441	0.244912	29	ENSG00000152778	+	IFIT5	224.407	-1.09786
chr10	92216305	92216510	92216292	92216357	21	-0.426002	0.337771	0.523673	92	92216462	92216513	3	-1.04402	0.46945	0.64907	11	ENSG00000105988	+	NHP2P1	2794.29	-0.68744
chr10	93482354	93482582	93482533	93482618	838	2.8018	8.18831e-116	2.12987e-113	2172	93482225	93482403	8	1.86203	1.32228e-05	8.29324e-05	98	ENSG00000138119	-	MYOF	25235.3	1.27734
chr10	94402540	94403712	94402467	94402570	42	-0.220982	0.339339	0.525198	337	94403652	94403729	14	1.54623	0.000568461	0.00259157	86	ENSG00000108239	+	TBC1D12	570.522	-0.102717
chr10	95907925	95908133	95907901	95907975	11	-2.55384	6.71073e-05	0.00037042	71	95908083	95908162	10	-3.70458	5.47528e-06	3.66012e-05	74	ENSG00000188649	+	CC2D2B	4.4375	-1.58732
chr10	96129721	96129998	96129713	96129778	27	-0.158221	0.671555	0.808145	131	96129925	96130003	9	0.334462	0.496537	0.673599	64	ENSG00000177853	+	ZNF518A	994.252	-0.148275
chr10	96130052	96130735	96130030	96130105	50	0.413835	0.145276	0.287199	217	96130690	96130742	5	-0.289967	0.739886	0.853464	21	ENSG00000177853	+	ZNF518A	994.252	-0.148275
chr10	96586630	96587011	96586950	96587039	8060	0.0404423	0.654917	0.796353	41761	96586603	96586683	20	0.469667	0.294482	0.476647	91	ENSG00000077147	-	TM9SF3	6826.91	0.0867622
chr10	96832297	96832518	96832270	96832344	951	0.681983	1.98927e-13	2.93636e-12	4088	96832466	96832526	3	-0.264765	0.764755	0.869583	21	ENSG00000196233	+	LCOR	2820.26	1.32519
chr10	97292304	97292636	97292585	97292673	114	-1.18101	6.68676e-10	7.32882e-09	585	97292293	97292347	4	-0.624298	0.496282	0.673306	22	ENSG00000213390	-	ARHGAP19	521.552	-1.36501
chr10	97333869	97334717	97334648	97334742	89	-0.237167	0.162223	0.311979	721	97333866	97333922	7	-0.109187	0.895664	0.945703	25	ENSG00000181274	-	FRAT2	780.907	-0.587122
chr10	97400220	97401339	97401209	97401358	157	-0.0084245	0.959491	0.979514	724	97400218	97400269	9	1.31995	0.065666	0.155765	32	ENSG00000052749	-	RRP12	2436.77	-0.0648639
chr10	97497895	97498402	97498341	97498422	681	-0.271589	0.00349631	0.0130989	3962	97497873	97497944	25	-0.162125	0.706881	0.832222	114	ENSG00000155229	-	MMS19	1905.64	-0.263456
chr10	97498937	97499499	97498839	97499071	295	1.57581	1.61403e-48	1.04876e-46	2869	97499447	97499504	7	1.89673	0.00482769	0.0173555	44	ENSG00000165886	+	UBTD1	919.062	1.59193
chr10	97849294	97849802	97849784	97849830	7	1.58392	0.0646172	0.153799	23	97849275	97849346	21	0.851228	0.0136139	0.0425569	141	ENSG00000227356	-	LINC00866	2.81956	2.91067
chr10	97849854	97850229	97849816	97849909	37	0.54491	0.0466198	0.118621	247	97850206	97850230	11	0.329003	0.794471	0.887693	10	ENSG00000155265	+	GOLGA7B	369.895	0.71634
chr10	99329357	99329823	99329351	99329432	108	0.179336	0.388163	0.574803	420	99329775	99329824	3	-0.594261	0.45405	0.635058	27	ENSG00000119946	+	CNNM1	346.744	0.117115
chr10	99620966	99621280	99620833	99621150	50	0.659314	0.00249977	0.00975175	399	99621228	99621289	3	1.16129	0.167821	0.319928	24	ENSG00000260475	+	ENSG00000260475	40.354	2.12485
chr10	99732258	99732512	99732226	99732327	292	-0.278377	0.00313651	0.0119184	3191	99732464	99732518	5	-3.02699	0.00284704	0.0109374	35	ENSG00000119929	+	CUTC	387.168	-0.403095
chr10	100286125	100286214	100286138	100286234	223	4.97786	1.40395e-98	2.66706e-96	1205	100286119	100286180	7	1.16354	0.106771	0.227774	34	ENSG00000196072	-	BLOC1S2	2938.62	1.32144
chr10	100286286	100286679	100286621	100286710	3581	1.16071	1.88558e-28	6.28053e-27	18246	100286285	100286336	15	3.40616	0.000134385	0.000697596	37	ENSG00000196072	-	BLOC1S2	2938.62	1.32144
chr10	100371444	100373317	100371442	100371491	24	0.267418	0.62582	0.775141	56	100373179	100373401	28	1.48578	8.95277e-06	5.77029e-05	171	ENSG00000235823	+	OLMALINC	1939.82	2.1078
chr10	100912962	100913348	100912956	100913022	1967	-0.655093	2.13438e-13	3.14286e-12	4418	100913288	100913377	26	-0.327362	0.296375	0.478776	181	ENSG00000119906	+	SLF2	1749.21	-0.704273
chr10	100987357	100987473	100987396	100987512	1459	-0.255342	0.00258807	0.0100623	11149	100987301	100987397	14	0.581191	0.125699	0.257458	127	ENSG00000055950	-	MRPL43	1690.63	-0.293721
chr10	100997073	100997558	100997039	100997152	352	-0.729656	2.88314e-12	3.90467e-11	2973	100997510	100997561	11	-0.911151	0.207311	0.372828	39	ENSG00000107816	+	LZTS2	2162.64	-0.358521
chr10	100999295	100999661	100999282	100999368	73	0.827492	3.97192e-05	0.000228244	421	100999612	100999699	9	-0.545337	0.29896	0.481774	62	ENSG00000107816	+	LZTS2	2162.64	-0.358521
chr10	101060822	101061004	101060942	101061023	40	-0.874881	0.012705	0.0400908	164	101060823	101060870	7	-0.177189	0.891562	0.943706	10	ENSG00000273162	-	ENSG00000273162	74.5302	-1.94404
chr10	101061241	101062965	101061104	101061291	254	-0.336779	0.0440206	0.1132	964	101062946	101062997	9	1.93108	0.0203134	0.0596191	27	ENSG00000107821	+	KAZALD1	541.752	0.141732
chr10	101066429	101067558	101066272	101066478	127	0.951891	1.33459e-06	9.80367e-06	614	101067513	101067565	11	-0.39074	0.635631	0.782571	25	ENSG00000107821	+	KAZALD1	541.752	0.141732
chr10	101694406	101695003	101694392	101694456	17	0.610015	0.151311	0.296074	89	101694928	101695008	288	-0.307327	0.025845	0.0729908	1325	ENSG00000286489	+	ENSG00000286489	5.03781	0.321879
chr10	101694747	101695153	101695077	101695190	1041	0.0337145	0.717935	0.83967	6214	101694736	101694789	4	-0.757889	0.460437	0.64104	16	ENSG00000107829	-	FBXW4	1656.07	-0.187368
chr10	101818000	101818441	101818389	101818460	4409	0.844644	3.15425e-16	5.62905e-15	9684	101817973	101818065	12	0.609061	0.15217	0.29739	93	ENSG00000198408	-	OGA	5378.91	0.66407
chr10	102055993	102056172	102056075	102056270	126	-0.789824	1.2476e-09	1.32897e-08	1678	102055989	102056040	5	0.509524	0.602024	0.756847	17	ENSG00000120029	-	ARMH3	992.493	-0.723259
chr10	102119888	102120367	102120217	102120487	144	0.107691	0.341643	0.527404	1857	102119889	102119937	9	-1.51139	0.107347	0.228687	24	ENSG00000198728	-	LDB1	4176.19	1.1131
chr10	102394533	102395555	102394462	102394607	141	0.0734535	0.675829	0.811059	676	102395504	102395565	26	1.80904	0.000222869	0.0011034	81	ENSG00000077150	+	NFKB2	2089.98	-0.16788
chr10	102420839	102421103	102420800	102420907	57	-0.0722707	0.825745	0.906208	174	102420954	102421107	10	-0.753728	0.21243	0.379363	51	ENSG00000107872	+	FBXL15	1069.23	-0.235219
chr10	102449844	102450375	102449831	102449924	74	-1.3656	1.68493e-07	1.40194e-06	386	102450327	102450409	17	-2.25533	0.00338962	0.012749	44	ENSG00000269609	+	C10orf95-AS1	494.925	-0.971454
chr10	102450045	102450567	102450044	102450093	7	-1.67595	0.105555	0.225801	21	102450502	102450581	22	0.129548	0.691938	0.822331	160	ENSG00000269609	+	C10orf95-AS1	494.925	-0.971454
chr10	102450639	102451542	102451437	102451573	90	-1.41974	8.55696e-09	8.31939e-08	378	102450636	102450773	43	0.287172	0.262955	0.440907	268	ENSG00000120055	-	C10orf95	91.5457	-0.847704
chr10	102502325	102502711	102502639	102502731	3867	-0.332612	0.000155648	0.000796576	10225	102502322	102502376	4	-1.05182	0.283297	0.463638	19	ENSG00000138107	-	ACTR1A	3824.92	-0.382274
chr10	102643928	102644200	102644068	102644219	16	1.47099	0.00260705	0.0101287	77	102643855	102643982	182	0.450328	0.00418223	0.0153277	1034	ENSG00000272933	-	ENSG00000272933	35.1417	0.949001
chr10	102644487	102644984	102644464	102644558	120	-1.79975	1.00458e-19	2.20294e-18	815	102644908	102644994	20	-0.738287	0.0415452	0.107974	141	ENSG00000171206	+	TRIM8	4110.05	0.988893
chr10	102645073	102645881	102645022	102645154	5	-0.0275327	0.95981	0.979626	56	102645832	102645882	6	2.06792	0.00690788	0.023751	33	ENSG00000171206	+	TRIM8	4110.05	0.988893
chr10	102854258	102854512	102854445	102854527	64	0.457934	0.0975744	0.212531	231	102854223	102854332	1571	0.964912	6.50392e-29	2.21254e-27	4629	ENSG00000282772	-	ENSG00000282772	23.8992	0.747196
chr10	103192792	103193271	103193226	103193289	2861	-0.487509	1.75991e-07	1.46116e-06	4452	103192784	103192847	5	0.78338	0.186553	0.344852	46	ENSG00000076685	-	NT5C2	7088.91	-0.479193
chr10	103367975	103368616	103367951	103368037	136	-1.12003	5.67953e-11	6.87267e-10	893	103368552	103368645	57	1.91015	1.06381e-08	1.02333e-07	164	ENSG00000148835	+	TAF5	344.713	-1.11939
chr10	104231869	104232375	104232230	104232383	12	-0.150994	0.623612	0.773645	186	104231867	104231919	4	-1.38799	0.265842	0.444416	13	ENSG00000197748	-	CFAP43	148.704	3.37215
chr10	110871927	110872311	110871909	110871998	3153	1.58915	1.03403e-57	8.47845e-56	13921	110872186	110872389	231	2.03157	2.34945e-25	6.7995e-24	697	ENSG00000150593	+	PDCD4	2948.93	1.54915
chr10	110918612	110919192	110919111	110919370	178	-0.370431	0.00882228	0.0293011	1315	110918609	110918659	7	0.738472	0.326513	0.512388	27	ENSG00000214413	-	BBIP1	402.219	-0.553915
chr10	112447245	112447571	112447198	112447285	546	0.367821	0.000410097	0.00192578	3360	112447500	112447576	9	-0.637565	0.314454	0.499541	51	ENSG00000151532	+	VTI1A	1161.05	0.21802
chr10	112950246	112951482	112950240	112950407	837	-0.012553	0.913931	0.956094	2318	112951439	112951485	12	-2.75178	0.0334131	0.0902997	21	ENSG00000148737	+	TCF7L2	339.711	-0.110727
chr10	112951831	112951987	112951935	112952014	22	-0.249121	0.546595	0.715507	103	112951780	112951838	5	-1.40656	0.0401333	0.104939	45	ENSG00000233547	-	ENSG00000233547	6.05387	-0.222212
chr10	114821759	114822947	114821743	114821829	915	0.379027	6.22579e-05	0.000345661	4189	114822887	114822954	33	2.53059	6.1265e-08	5.37083e-07	97	ENSG00000151553	+	FAM160B1	1522.77	0.638503
chr10	114938226	114938691	114938203	114938300	533	0.556335	6.45479e-07	4.96012e-06	4187	114938646	114938694	8	5.08429	4.92134e-05	0.000278188	19	ENSG00000165832	+	TRUB1	1714.75	0.698625
chr10	116271729	116272186	116272110	116272308	2253	-1.99155	3.17677e-106	7.0486e-104	11638	116271730	116271777	9	-1.64449	0.252574	0.428953	10	ENSG00000151892	-	GFRA1	15880.6	-2.09275
chr10	116272441	116273154	116273144	116273218	423	-1.83155	9.04089e-54	6.75757e-52	2815	116272439	116272493	10	-1.68736	0.00408458	0.0150134	63	ENSG00000151892	-	GFRA1	15880.6	-2.09275
chr10	116273319	116273642	116273382	116273663	162	-1.66172	4.70482e-37	2.16981e-35	2277	116273314	116273397	5	-2.35228	0.00511418	0.0182527	39	ENSG00000151892	-	GFRA1	15880.6	-2.09275
chr10	116274266	116274294	116274245	116274438	106	-1.56421	1.37825e-16	2.52136e-15	731	116274226	116274311	11	-2.86997	5.8189e-09	5.77966e-08	139	ENSG00000151892	-	GFRA1	15880.6	-2.09275
chr10	116849511	116849721	116849652	116849804	44	-1.24131	3.25336e-06	2.25394e-05	305	116849494	116849562	8	-1.17551	0.0610066	0.147043	51	ENSG00000165868	-	HSPA12A	567.203	-0.279986
chr10	117004682	117005185	117005131	117005304	349	-0.616026	1.70967e-08	1.6016e-07	3029	117004679	117004730	11	0.622749	0.42515	0.60946	26	ENSG00000187164	-	SHTN1	2164.01	-0.681006
chr10	118046820	118046892	118046810	118046868	7	1.37119	0.0195543	0.0577624	50	118046818	118046922	84	0.6141	0.0485478	0.122545	698	ENSG00000177640	+	CASC2	32.8008	-1.66797
chr10	119080219	119080816	119080755	119080834	3908	0.40758	5.84974e-06	3.89381e-05	19582	119080194	119080291	110	0.816214	3.93307e-06	2.69019e-05	575	ENSG00000107581	-	EIF3A	15825.1	0.267813
chr10	119596089	119596664	119596596	119596684	515	0.218037	0.0195061	0.0576416	4013	119596080	119596136	3	-0.452547	0.654377	0.79604	17	ENSG00000151923	-	TIAL1	3659.96	-0.236378
chr10	119596750	119596961	119596910	119596987	1725	-0.983086	1.79383e-13	2.6618e-12	5106	119596726	119596815	10	-0.609466	0.242332	0.415921	66	ENSG00000151923	-	TIAL1	3659.96	-0.236378
chr10	119872364	119872842	119872790	119872864	1027	-0.919686	3.25316e-22	8.10041e-21	5240	119872362	119872415	5	1.63086	0.0707299	0.165178	23	ENSG00000197771	-	MCMBP	2803.29	-0.973622
chr10	121927269	121928030	121927968	121928047	491	-0.373443	0.0016384	0.00670135	2359	121927268	121927321	18	0.0799816	0.903419	0.950106	36	ENSG00000107669	-	ATE1	838.424	-0.439147
chr10	121928185	121928439	121928064	121928327	55	0.516594	0.0333395	0.0901632	301	121928392	121928492	23	-1.05134	0.000472655	0.00219311	229	ENSG00000226864	+	ATE1-AS1	28.415	1.18757
chr10	121974880	121975193	121975141	121975246	897	-1.07365	3.28191e-30	1.1736e-28	4743	121974864	121974947	131	0.194316	0.321885	0.507612	506	ENSG00000107672	-	NSMCE4A	931.302	-0.882044
chr10	122112884	122113727	122112881	122112924	625	1.75512	3.50421e-27	1.10042e-25	1033	122113678	122113731	24	1.39436	0.0172589	0.0520092	50	ENSG00000138162	+	TACC2	1711.29	1.55829
chr10	122980421	122980646	122980398	122980486	107	0.307027	0.0839347	0.189034	668	122980594	122980647	3	-0.243263	0.802355	0.892577	18	ENSG00000179988	+	PSTK	127.501	0.453626
chr10	124091819	124092405	124092323	124092434	285	1.05113	4.68163e-14	7.24052e-13	1049	124091818	124091871	7	2.8152	0.0135736	0.0424529	19	ENSG00000182022	-	CHST15	3428.74	1.18967
chr10	124093231	124093563	124093417	124093604	1077	1.17992	9.30501e-44	5.31133e-42	8514	124093226	124093281	4	3.07714	0.00378126	0.0140346	22	ENSG00000182022	-	CHST15	3428.74	1.18967
chr10	124461822	124462044	124461817	124461908	757	0.476394	2.80811e-06	1.96366e-05	4495	124461999	124462056	10	1.97839	0.0144463	0.0447369	28	ENSG00000107902	+	LHPP	555.901	0.488101
chr10	124916919	124917219	124916826	124916973	552	0.330584	0.00438967	0.0159778	2913	124917175	124917221	10	0.704474	0.490531	0.668357	16	ENSG00000249456	+	ENSG00000249456	98.1844	0.281991
chr10	125159491	125160530	125160477	125160538	2540	0.931998	2.79274e-22	6.97656e-21	7465	125159463	125159540	16	0.685087	0.144083	0.285439	81	ENSG00000175029	-	CTBP2	3955	0.723591
chr10	125160980	125161029	125160950	125161070	114	-1.75175	2.06688e-12	2.83232e-11	411	125160930	125161016	19	1.735	6.36883e-07	4.89851e-06	153	ENSG00000175029	-	CTBP2	3955	0.723591
chr10	125161182	125162787	125161175	125161233	12	-0.763798	0.20439	0.368863	53	125162717	125162795	37	-0.848089	0.00649944	0.022517	186	ENSG00000282787	+	ENSG00000282787	26.2904	1.97312
chr10	125895849	125896475	125896414	125896516	806	0.0638038	0.452664	0.633822	5669	125895703	125895912	27	3.77501	5.07118e-11	6.16283e-10	102	ENSG00000089876	-	DHX32	1659.91	0.153871
chr10	125896567	125896724	125896550	125896637	90	0.00917619	0.962042	0.980877	513	125896679	125896727	8	1.64988	0.103194	0.221854	17	ENSG00000203780	+	FANK1	87.8047	0.94725
chr10	126905451	126906190	126905421	126905504	369	-0.131861	0.350674	0.536311	1480	126906150	126906255	10	-1.6638	0.00769141	0.0260414	58	ENSG00000150760	+	DOCK1	905.422	-0.415185
chr10	130110586	130110829	130110750	130110844	63	0.06418	0.754505	0.863014	427	130110580	130110638	20	-0.147193	0.760869	0.867115	79	ENSG00000237489	-	C10orf143	122.231	-0.0986757
chr10	132185848	132186749	132186703	132186755	8	1.29001	0.233925	0.405643	14	132185827	132185895	12	-1.6573	0.00666154	0.0230022	57	ENSG00000235010	-	ENSG00000235010	3.82996	1.4813
chr10	132397199	132397827	132397172	132397274	86	0.167068	0.2782	0.458126	970	132397782	132397830	6	2.20956	0.0173666	0.0522978	23	ENSG00000171813	+	PWWP2B	1800.24	0.290751
chr10	132537830	132538073	132537795	132537877	904	0.886329	4.17923e-23	1.09042e-21	7031	132538051	132538076	12	1.24964	0.254767	0.431645	14	ENSG00000068383	+	INPP5A	1878.88	1.00032
chr10	133308940	133309112	133309044	133309195	251	-0.491422	5.09699e-05	0.000287234	2155	133308892	133308980	216	-1.65945	6.93112e-42	3.70841e-40	2204	ENSG00000130640	-	TUBGCP2	2929.1	-0.47008
chr10	133325533	133327345	133327299	133327349	10	1.04689	0.216549	0.384467	23	133325516	133325574	12	0.936521	0.0955158	0.20906	49	ENSG00000130643	-	CALY	7.85732	1.13701
chr11	207711	208689	207692	207764	990	-0.678401	1.24447e-07	1.05223e-06	2338	208620	208762	29	0.595244	0.142325	0.282844	106	ENSG00000177963	+	RIC8A	3238.48	0.039533
chr11	393444	393954	393442	393511	28	-1.32077	0.0154219	0.0472716	68	393916	393958	9	-0.432066	0.648304	0.791701	20	ENSG00000184363	+	PKP3	6428.95	-0.393145
chr11	394208	394614	394188	394281	1639	-0.358433	7.49119e-05	0.000409516	8374	394542	394617	37	1.17067	0.00118047	0.00500012	135	ENSG00000184363	+	PKP3	6428.95	-0.393145
chr11	448270	450181	448256	448317	6	-0.138487	0.813672	0.899051	49	450102	450185	21	-1.4032	0.000915896	0.00397996	113	ENSG00000174915	+	PTDSS2	623.205	-0.353484
chr11	506461	506767	506706	506811	430	-0.138719	0.283421	0.463742	1977	506461	506514	19	-0.00679146	0.99179	0.995795	42	ENSG00000023191	-	RNH1	5158.84	-0.231435
chr11	506996	507194	507123	507290	641	-0.0785962	0.461801	0.642291	3570	506981	507043	6	-1.54867	0.0205401	0.0601828	48	ENSG00000023191	-	RNH1	5158.84	-0.231435
chr11	534719	535537	535368	535614	2495	1.13367	4.54009e-40	2.30235e-38	16776	534709	534960	232	3.78199	1.77346e-50	1.22485e-48	559	ENSG00000174775	-	HRAS	3759.66	1.28363
chr11	535788	537299	537220	537389	39	0.703378	0.000481183	0.00222853	432	535765	535845	53	1.41779	5.62904e-09	5.6016e-08	312	ENSG00000174775	-	HRAS	3759.66	1.28363
chr11	560986	561561	560961	561112	191	-0.185069	0.168214	0.320461	1966	561449	561607	8	0.357892	0.441811	0.624115	75	ENSG00000099849	+	RASSF7	1728.09	-0.277084
chr11	694685	695044	694972	695072	266	-0.979753	1.24939e-13	1.87434e-12	1475	694668	694799	132	0.0437773	0.829185	0.908297	504	ENSG00000177030	-	DEAF1	1155.43	0.456769
chr11	695410	695593	695381	695485	12	0.443184	0.304424	0.488076	85	695567	695603	8	-0.856659	0.325945	0.511787	24	ENSG00000177042	+	TMEM80	442.914	0.058886
chr11	695674	695754	695638	695747	51	1.09272	6.87063e-05	0.000378505	236	695708	695759	8	-0.182003	0.788311	0.884167	35	ENSG00000177042	+	TMEM80	442.914	0.058886
chr11	706230	706518	706196	706284	13306	2.14593	2.19082e-159	1.14323e-156	29834	706469	706523	60	4.97917	2.32633e-10	2.65719e-09	100	ENSG00000177106	+	EPS8L2	13976.8	2.01118
chr11	706615	706963	706608	706697	81	3.90529	1.03234e-42	5.71884e-41	458	706664	707096	124	3.38116	1.50713e-81	2.10939e-79	1051	ENSG00000177106	+	EPS8L2	13976.8	2.01118
chr11	797741	798266	798212	798291	422	-1.30509	9.14342e-20	2.00766e-18	1254	797666	797794	66	-0.92761	0.000766438	0.00338563	295	ENSG00000177542	-	SLC25A22	1463.34	-0.247487
chr11	804445	805013	804966	805237	387	3.47555	1.09289e-89	1.76989e-87	1342	804436	804574	15	6.32861	5.15954e-09	5.15625e-08	75	ENSG00000177595	-	PIDD1	4483.95	2.92987
chr11	809298	809500	809452	809531	173	-0.0194697	0.911052	0.954541	595	809292	809345	6	-1.58457	0.0865318	0.193586	25	ENSG00000177595	-	PIDD1	4483.95	2.92987
chr11	809649	809800	809750	809804	15	0.636647	0.272064	0.451275	51	809611	809701	14	0.317284	0.447824	0.629425	91	ENSG00000177595	-	PIDD1	4483.95	2.92987
chr11	832764	832852	832805	832893	11	-0.639759	0.213214	0.380355	75	832710	832803	66	0.204103	0.303553	0.487059	505	ENSG00000255108	-	ENSG00000255108	15.218	1.89473
chr11	832951	833391	832934	833024	770	0.103539	0.282901	0.463251	3796	833339	833397	4	0.429464	0.676577	0.811623	16	ENSG00000177697	+	CD151	4733.65	-0.0047691
chr11	1223065	1223788	1223054	1223117	4275	2.08369	2.19102e-65	2.15122e-63	4662	1223739	1223792	56	-0.399837	0.389622	0.576331	84	ENSG00000117983	+	MUC5B	4804.98	2.09127
chr11	1571199	1572102	1571200	1571251	5	-0.523359	0.64931	0.79227	14	1572030	1572115	46	-0.2343	0.324236	0.510135	329	ENSG00000233930	+	KRTAP5-AS1	1365.04	1.77505
chr11	1571454	1572270	1572167	1572274	105	1.48887	4.07447e-19	8.65425e-18	773	1571434	1571487	2	-0.150363	0.900443	0.948439	12	ENSG00000184545	-	DUSP8	1922.05	1.16869
chr11	1572533	1573047	1572411	1572659	588	1.64267	9.80781e-49	6.41232e-47	2294	1572998	1573062	97	-0.758048	0.0409582	0.106679	162	ENSG00000233930	+	KRTAP5-AS1	1365.04	1.77505
chr11	1573300	1573725	1573225	1573347	10	1.36428	0.0463291	0.118041	35	1573680	1573730	6	-1.09966	0.333607	0.519494	15	ENSG00000233930	+	KRTAP5-AS1	1365.04	1.77505
chr11	1573756	1574042	1573757	1573806	10	-0.528333	0.499245	0.676046	29	1573995	1574055	3	0.939672	0.337722	0.523655	17	ENSG00000233930	+	KRTAP5-AS1	1365.04	1.77505
chr11	1753818	1753841	1753794	1753907	351	0.0286296	0.867424	0.930223	647	1753797	1753866	13	0.590219	0.237714	0.410017	71	ENSG00000250644	-	ENSG00000250644	330.414	1.14903
chr11	1762638	1763876	1763829	1763984	96501	0.350349	1.21242e-05	7.64896e-05	129407	1762636	1762725	18	-0.347216	0.502416	0.679009	62	ENSG00000117984	-	CTSD	27309.2	0.143072
chr11	2269600	2271012	2270915	2271044	96	-2.25068	3.22371e-39	1.59368e-37	1084	2269597	2269650	6	1.26711	0.0948755	0.208023	31	ENSG00000183734	-	ASCL2	618.889	-1.68134
chr11	2377313	2377999	2377296	2377490	4641	0.0583723	0.791919	0.885994	11129	2377939	2378018	29	0.179406	0.597911	0.753943	143	ENSG00000110651	+	CD81	7870.95	0.37355
chr11	2902307	2903812	2902268	2902441	374	-0.203478	0.0433578	0.111781	2559	2903764	2903813	13	-1.01562	0.173698	0.327975	33	ENSG00000110628	+	SLC22A18	750.443	-0.270364
chr11	2928911	2929419	2929372	2929429	16099	-0.334327	0.000162764	0.000829681	22146	2928911	2928967	4	0.151285	0.874807	0.934605	18	ENSG00000181649	-	PHLDA2	2272.53	-0.367438
chr11	3855162	3855559	3855507	3855592	12	1.32444	0.00405195	0.0149149	85	3855144	3855246	128	-0.288565	0.0602319	0.145566	921	ENSG00000228661	-	STIM1-AS1	10.4312	1.37375
chr11	6609777	6611476	6611431	6611477	23	2.74519	0.0571824	0.139767	38	6609777	6609829	5	-1.19334	0.44431	0.626282	8	ENSG00000254641	-	ENSG00000254641	0	NA
chr11	6610234	6612213	6612137	6612235	4335	0.369166	1.74245e-06	1.25833e-05	18606	6610233	6610284	16	-0.56321	0.577519	0.738629	18	ENSG00000166337	-	TAF10	844.818	0.319164
chr11	6612330	6614050	6613916	6614051	33	0.548857	0.247739	0.422883	78	6612328	6612377	6	0.953337	0.441367	0.623707	12	ENSG00000166337	-	TAF10	844.818	0.319164
chr11	7597188	7597776	7597188	7597237	6	-1.19408	0.280689	0.460761	16	7597718	7597793	5	-0.917704	0.0702518	0.164269	74	ENSG00000166387	+	PPFIBP2	101.158	-0.718089
chr11	8964221	8964437	8964353	8964461	781	0.217409	0.0164687	0.0499675	5679	8964196	8964275	8	2.06098	0.000152748	0.00078335	66	ENSG00000175348	-	TMEM9B	1204.5	-0.16747
chr11	8964509	8964933	8964503	8964581	48	0.921914	0.00118719	0.00502379	228	8964805	8964956	115	-1.15724	5.9526e-06	3.95573e-05	320	ENSG00000254860	+	TMEM9B-AS1	80.4737	1.49288
chr11	9461011	9461332	9460997	9461160	413	0.651518	1.1258e-07	9.56489e-07	1758	9461284	9461336	8	0.618833	0.382485	0.568986	36	ENSG00000166478	+	ZNF143	803.21	0.757369
chr11	9758293	9758824	9758275	9758362	43	-1.34457	0.000177727	0.00089837	162	9758793	9758826	5	-0.766243	0.474931	0.654219	16	ENSG00000246273	+	SBF2-AS1	91.6948	-0.877187
chr11	10294158	10294206	10294154	10294222	221	-0.436077	0.00200914	0.00803198	1047	10294158	10294182	41	0.26999	0.638199	0.784537	54	ENSG00000133812	-	SBF2	516.948	-0.685061
chr11	10807977	10808925	10808873	10808941	21906	-0.167526	0.114751	0.240626	64838	10807978	10808030	7	0.708705	0.32643	0.51233	31	ENSG00000110321	-	EIF4G2	34292	0.0990728
chr11	12377570	12377855	12377547	12377645	456	-0.119638	0.273846	0.453241	2309	12377807	12377861	3	-2.23049	0.0440687	0.113286	21	ENSG00000197702	+	PARVA	1210.2	-0.340509
chr11	13277789	13278047	13277774	13277867	133	0.551051	3.30563e-05	0.000192574	1380	13277999	13278048	5	1.95397	0.0864786	0.193507	15	ENSG00000133794	+	ARNTL	425.819	0.774926
chr11	17013144	17013338	17013293	17013342	21	2.05612	0.00841128	0.0281105	33	17013112	17013225	127	2.8625	3.6553e-48	2.36061e-46	705	ENSG00000166689	-	PLEKHA7	2268.1	0.465112
chr11	17013986	17014199	17013974	17014108	337	0.645938	1.58365e-06	1.14984e-05	1683	17014148	17014231	26	0.301575	0.167755	0.319839	378	ENSG00000184669	+	OR7E14P	490.9	1.05301
chr11	17014311	17014413	17014353	17014439	812	-0.131904	0.222629	0.391833	2947	17014167	17014373	111	0.530633	0.00602402	0.0210737	516	ENSG00000166689	-	PLEKHA7	2268.1	0.465112
chr11	18322299	18322490	18322277	18322360	97	0.874186	4.14268e-07	3.27356e-06	654	18322444	18322507	23	-0.282657	0.46017	0.640787	125	ENSG00000110768	+	GTF2H1	1908.99	0.158701
chr11	18526681	18526922	18526842	18526948	2688	0.138341	0.129563	0.263338	19954	18526678	18526731	6	1.79495	0.0231921	0.0666678	29	ENSG00000074319	-	TSG101	2982.34	0.144166
chr11	18634587	18634812	18634741	18634827	16	0.379374	0.40703	0.593589	77	18634570	18634639	54	0.494233	0.217217	0.3853	104	ENSG00000179119	-	SPTY2D1	2134.16	0.150166
chr11	19241305	19241619	19241569	19241714	317	-3.64611	7.91494e-48	5.09207e-46	844	19241299	19241393	29	-2.18962	4.686e-10	5.21026e-09	211	ENSG00000129173	-	E2F8	645.877	-3.24139
chr11	22625597	22625822	22625757	22625849	254	-1.00428	7.97311e-10	8.66677e-09	985	22625585	22625668	19	-0.261336	0.605765	0.759631	69	ENSG00000183161	-	FANCF	669.712	-0.857814
chr11	22829411	22829833	22829781	22829864	2908	-1.45902	1.36752e-67	1.43075e-65	20687	22829411	22829489	21	-0.0621501	0.876781	0.935723	112	ENSG00000198168	-	SVIP	1092.58	-1.5999
chr11	30586067	30586352	30586234	30586377	47	-0.61065	0.0390639	0.102678	216	30586063	30586117	10	0.929528	0.224646	0.394235	29	ENSG00000066382	-	MPPED2	172.203	-0.745868
chr11	32829930	32830457	32829909	32829997	190	0.241777	0.155502	0.302176	683	32830399	32830458	4	2.37667	0.010646	0.0344116	24	ENSG00000135378	+	PRRG4	498.313	0.406411
chr11	33039571	33039900	33039497	33039857	919	0.580022	6.58058e-11	7.92219e-10	4091	33039842	33039907	5	0.988563	0.236186	0.408265	25	ENSG00000176148	+	TCP11L1	620.25	0.83752
chr11	33257283	33258475	33257226	33257434	439	0.520112	1.50891e-08	1.42157e-07	5446	33258428	33258476	8	0.607005	0.411584	0.59764	28	ENSG00000110422	+	HIPK3	2518.44	0.619043
chr11	34051731	34052123	34051713	34051784	7077	1.13317	1.67378e-36	7.58279e-35	16504	34052075	34052135	11	0.654957	0.251211	0.427274	48	ENSG00000135387	+	CAPRIN1	13109.6	0.299459
chr11	34052340	34053324	34052062	34052498	945	-0.651196	6.64237e-09	6.55215e-08	5644	34053279	34053327	7	1.29673	0.233973	0.405701	14	ENSG00000135387	+	CAPRIN1	13109.6	0.299459
chr11	35139170	35139696	35139164	35139223	2798	1.12693	3.89269e-41	2.03131e-39	6106	35139645	35139702	4	-0.053909	0.945622	0.972247	30	ENSG00000026508	+	CD44	2842.28	1.19837
chr11	35662879	35663457	35662728	35662944	871	-0.762856	2.89235e-17	5.5469e-16	7555	35663339	35663482	11	-0.914994	0.0144238	0.0446707	163	ENSG00000166326	+	TRIM44	3344.98	-0.931264
chr11	36510048	36510268	36510207	36510295	539	0.134469	0.332862	0.518754	1570	36510035	36510095	4	2.35125	0.0107207	0.0346254	24	ENSG00000175104	-	TRAF6	529.179	0.25093
chr11	44949735	44950882	44950705	44950904	1633	-0.307732	0.00147612	0.00610496	6324	44949704	44949787	5	-2.31209	0.014741	0.0455295	30	ENSG00000175274	-	TP53I11	3093.98	-0.410996
chr11	45146653	45147183	45146636	45146730	50	-1.95954	2.03823e-11	2.55757e-10	325	45147110	45147199	20	0.45563	0.135745	0.272806	173	ENSG00000019485	+	PRDM11	195.32	-1.39708
chr11	45804082	45804282	45804066	45804138	41	-1.60827	6.97822e-10	7.63441e-09	342	45804237	45804296	4	-0.580967	0.508123	0.683738	24	ENSG00000181830	+	SLC35C1	4226.48	-1.27899
chr11	45918145	45918821	45918748	45918826	30	0.24521	0.409853	0.596144	223	45918142	45918209	50	-0.43282	0.307933	0.492227	95	ENSG00000121680	-	PEX16	2298.52	0.542286
chr11	46121028	46121179	46121041	46121249	20	-1.70604	3.02067e-09	3.10124e-08	276	46121018	46121071	3	-1.01674	0.352868	0.5384	15	ENSG00000135365	-	PHF21A	542.326	-1.24997
chr11	46121298	46121453	46121382	46121492	178	-0.597672	1.12835e-05	7.15252e-05	1591	46121294	46121431	4	0.538114	0.36196	0.547657	46	ENSG00000135365	-	PHF21A	542.326	-1.24997
chr11	46345266	46347223	46345231	46345330	15	6.43991	4.02232e-10	4.50372e-09	133	46347176	46347229	22	5.19182	7.55387e-06	4.93527e-05	35	ENSG00000149091	+	DGKZ	2313.12	0.424805
chr11	46616785	46617193	46617116	46617220	222	0.388109	0.00316163	0.0120047	1247	46616782	46616834	6	2.8648	0.0100595	0.0327957	19	ENSG00000180423	-	HARBI1	334.823	0.362002
chr11	46617562	46617894	46617547	46617632	479	0.413449	0.000117623	0.000618717	2481	46617801	46617895	33	2.8476	5.76026e-13	8.23942e-12	160	ENSG00000175224	+	ATG13	3915	0.756854
chr11	46845892	46846277	46846218	46846317	1650	-1.11287	6.35576e-24	1.72485e-22	4780	46845891	46845942	12	1.16249	0.0954659	0.208978	35	ENSG00000175216	-	CKAP5	11698	-0.493175
chr11	47176346	47176878	47176808	47176896	4608	0.234968	0.0121823	0.0386665	14504	47176344	47176393	10	0.0998841	0.882471	0.938856	36	ENSG00000149182	-	ARFGAP2	6561.68	0.00965152
chr11	47185659	47186436	47186368	47186466	742	-1.5437	1.16273e-34	4.95178e-33	3608	47185654	47185714	10	-1.21593	0.0186227	0.0554561	73	ENSG00000165912	-	PACSIN3	1901.8	-1.55156
chr11	47191507	47191549	47191398	47191552	24	0.568671	0.262119	0.440063	64	47191499	47191552	6	1.07701	0.344014	0.529776	13	ENSG00000243802	-	ENSG00000243802	58.9798	0.949
chr11	47214470	47214841	47214443	47214547	109	-0.727	4.26066e-06	2.89719e-05	803	47214787	47214863	31	-1.38241	0.000498014	0.00229892	134	ENSG00000134574	+	DDB2	11267.7	2.49363
chr11	47215044	47215419	47214968	47215129	1850	2.54902	1.10875e-226	1.53655e-223	14723	47215348	47215425	23	3.78575	2.92161e-11	3.62196e-10	102	ENSG00000134574	+	DDB2	11267.7	2.49363
chr11	47269375	47269546	47269364	47269433	91	0.019696	0.935749	0.966965	344	47269496	47269576	5	-1.42521	0.0282119	0.0785366	50	ENSG00000110514	+	MADD	4190.83	-0.219863
chr11	47269670	47269993	47269651	47269750	79	-0.41882	0.00858897	0.0286331	878	47269934	47270023	48	-0.392479	0.211142	0.377783	185	ENSG00000110514	+	MADD	4190.83	-0.219863
chr11	47552464	47553131	47553082	47553144	3424	-0.502152	5.18901e-12	6.87337e-11	13705	47552447	47552514	15	-0.149181	0.781726	0.880203	57	ENSG00000149187	-	CELF1	5886.15	-0.200544
chr11	47565588	47566139	47565440	47565657	3925	-0.658045	4.82011e-14	7.44651e-13	27795	47566090	47566155	13	-0.399046	0.465918	0.645714	63	ENSG00000110536	+	PTPMT1	566.02	-0.539053
chr11	47714908	47715368	47715310	47715402	46	-0.756853	0.0255769	0.0723956	170	47714907	47714957	14	-3.29733	0.0126467	0.0399381	17	ENSG00000165923	-	AGBL2	61.6986	-0.50946
chr11	47848405	47848548	47848430	47848568	13	-0.346955	0.380977	0.567441	119	47848401	47848456	19	1.44485	0.0374982	0.0992454	37	ENSG00000030066	-	NUP160	4429.87	-0.866741
chr11	47980568	47981320	47980539	47980886	711	0.927937	3.26065e-18	6.59431e-17	3568	47981271	47981321	11	2.50862	0.0276283	0.0771738	16	ENSG00000149177	+	PTPRJ	2274.7	0.850385
chr11	57325261	57327512	57325257	57325314	3	-0.419218	0.704039	0.830484	14	57327434	57327514	28	-1.71757	0.00745188	0.0253359	54	ENSG00000254662	+	ENSG00000254662	5.24067	-0.935016
chr11	57711967	57712214	57712164	57712234	4330	0.664282	8.64188e-13	1.21982e-11	6927	57711955	57712008	8	-0.0665377	0.926696	0.962847	33	ENSG00000156603	-	MED19	536.811	0.66024
chr11	58578105	58578359	58578310	58578367	5	1.75876	0.0401745	0.105031	25	58578087	58578231	23	3.47263	1.68885e-12	2.32939e-11	121	ENSG00000110031	-	LPXN	170.671	2.33021
chr11	58579130	58579723	58579109	58579299	582	-0.841422	4.78855e-17	9.052e-16	6937	58579565	58579734	24	1.06166	0.00410941	0.0150922	127	ENSG00000255073	+	ZFP91-CNTF	0.469194	-0.994696
chr11	59142858	59143027	59142746	59142958	167	0.805908	6.39183e-06	4.22669e-05	580	59142961	59143032	16	0.250949	0.439546	0.622226	160	ENSG00000166801	+	FAM111A	1781.84	-0.373998
chr11	59615436	59615773	59615629	59615789	242	0.107317	0.344029	0.529776	2170	59615354	59615483	9	-0.643557	0.157273	0.304804	86	ENSG00000110048	-	OSBP	2938.87	0.157101
chr11	59755381	59755781	59755359	59755460	1589	1.09649	3.08737e-30	1.10731e-28	8786	59755713	59755792	9	2.51282	0.000100388	0.000535118	53	ENSG00000166900	+	STX3	2812.1	1.09862
chr11	61158905	61161142	61161066	61161156	44	0.00988141	0.972538	0.985529	208	61158905	61158973	8	1.01076	0.0932972	0.205262	46	ENSG00000167987	-	VPS37C	3735.75	0.807818
chr11	61161377	61161616	61161607	61161691	542	0.793211	2.01351e-16	3.64094e-15	6009	61161360	61161641	20	1.16644	6.59772e-05	0.000364706	205	ENSG00000167987	-	VPS37C	3735.75	0.807818
chr11	61294308	61294866	61294786	61295070	119	6.88866	1.95971e-29	6.80076e-28	546	61294305	61294384	43	4.56087	1.62068e-15	2.77004e-14	149	ENSG00000167992	-	VWCE	971.859	6.79907
chr11	61333239	61333793	61333208	61333321	1127	-0.297622	0.00119469	0.00505224	4751	61333742	61333798	6	-2.47349	0.00250103	0.00975534	42	ENSG00000149476	+	TKFC	3722.49	0.0131738
chr11	61362031	61362290	61362120	61362303	204	0.889112	4.77196e-12	6.33882e-11	1494	61361945	61362101	26	-0.397298	0.141571	0.281735	261	ENSG00000162144	-	CYB561A3	2947.26	0.37275
chr11	61429480	61429994	61429824	61430026	1297	0.227267	0.00711053	0.0243487	4729	61429474	61429558	16	-1.22496	0.0106228	0.0343537	93	ENSG00000149532	-	CPSF7	4767.82	0.0484815
chr11	61792675	61792833	61792784	61792838	6	-0.587517	0.328195	0.514008	48	61792657	61792744	70	-1.925	8.7217e-11	1.03962e-09	280	ENSG00000134825	-	TMEM258	1199.9	-0.198076
chr11	61814826	61815116	61815066	61815154	30	0.567234	0.0951368	0.208459	148	61814823	61814877	16	4.65741	0.00032561	0.00155989	14	ENSG00000149485	-	FADS1	9508.49	1.13634
chr11	61815432	61816147	61816102	61816184	10	1.03688	0.059824	0.144792	56	61815271	61815497	83	1.80161	8.97606e-19	1.86804e-17	468	ENSG00000149485	-	FADS1	9508.49	1.13634
chr11	61816461	61816854	61816782	61817022	4761	1.26767	6.07467e-59	5.13015e-57	9834	61816241	61816700	173	0.554716	0.000292422	0.00141452	880	ENSG00000149485	-	FADS1	9508.49	1.13634
chr11	61967090	61967165	61967097	61967190	20	3.51582	7.59706e-12	9.9308e-11	114	61967089	61967140	8	5.27006	0.00580007	0.0203899	22	ENSG00000167996	-	FTH1	15655.1	0.146138
chr11	61967293	61967630	61967580	61967638	328049	0.323299	0.000179591	0.000907031	409878	61967290	61967555	36	1.21562	0.00011482	0.000604986	196	ENSG00000167996	-	FTH1	15655.1	0.146138
chr11	62546010	62546805	62546755	62546813	9717	0.760793	6.03863e-20	1.3395e-18	17290	62545901	62546063	32	1.04441	0.00401796	0.0148072	132	ENSG00000124942	-	AHNAK	22345.5	0.412428
chr11	62600708	62601246	62601195	62601305	248	-0.213123	0.0485651	0.122574	2383	62600704	62600758	17	4.05475	2.42111e-05	0.00014446	40	ENSG00000149480	-	MTA2	12626.2	0.923693
chr11	62601306	62601762	62601591	62601899	2064	0.896802	7.13425e-31	2.63824e-29	24657	62601287	62601371	12	0.352025	0.450937	0.632284	75	ENSG00000149480	-	MTA2	12626.2	0.923693
chr11	62611788	62612745	62612692	62612782	703	-0.683992	9.04234e-10	9.77748e-09	2207	62611782	62611883	8	-0.386244	0.253838	0.430468	148	ENSG00000149499	-	EML3	2782.13	-0.875194
chr11	62671672	62671755	62671659	62671724	6557	-0.308302	0.00101492	0.00436448	16790	62671705	62671866	33	-1.47091	1.27624e-06	9.40447e-06	241	ENSG00000204922	+	UQCC3	1252.29	-0.43728
chr11	62671867	62672287	62672216	62672356	98	-1.75072	2.87565e-19	6.15433e-18	727	62671849	62671953	279	-0.0495238	0.69965	0.827396	1675	ENSG00000162194	-	LBHD1	320.716	-1.46703
chr11	62727198	62727456	62727406	62727598	2879	0.297918	0.000240552	0.00118249	17548	62727187	62727237	6	0.389838	0.544139	0.713654	38	ENSG00000214753	-	HNRNPUL2	2853.2	-0.435785
chr11	62728137	62728419	62728058	62728234	47	-0.869457	0.000379697	0.00179369	315	62728370	62728446	8	0.142418	0.834533	0.911603	37	ENSG00000162222	+	TTC9C	1079	-0.32935
chr11	62753935	62754147	62754095	62754177	103	0.0754684	0.69538	0.824548	542	62753929	62753989	21	-0.536624	0.374691	0.560968	47	ENSG00000185670	-	ZBTB3	342.376	0.299084
chr11	62771395	62771570	62771380	62771471	213	-0.460792	0.00222668	0.00879148	1219	62771518	62771574	4	-0.307835	0.62516	0.774757	45	ENSG00000162227	+	TAF6L	890.565	-0.418763
chr11	62786721	62787319	62787241	62787331	75	1.19354	1.49538e-10	1.74316e-09	580	62786706	62786796	92	0.659035	0.00282254	0.0108566	357	ENSG00000269176	-	ENSG00000269176	170.348	1.27094
chr11	62787401	62787486	62787368	62787474	1705	0.321373	3.00609e-05	0.000176508	8566	62787425	62787493	15	2.9806	5.30595e-08	4.68502e-07	82	ENSG00000185475	+	TMEM179B	1459.45	0.281222
chr11	62805614	62807437	62807390	62807439	20	1.05571	0.0958641	0.20966	43	62805597	62805672	30	-1.36885	8.38687e-05	0.000453813	172	ENSG00000162231	-	NXF1	3523.53	0.257109
chr11	62832243	62833889	62832241	62832296	9	0.227719	0.732033	0.848411	36	62833843	62833894	15	-1.94162	0.00602485	0.0210757	48	ENSG00000256690	+	ENSG00000256690	9.58309	0.367874
chr11	62839168	62839572	62839451	62839608	989	-0.64887	2.53593e-11	3.16191e-10	5977	62839162	62839221	8	-1.65513	0.0532524	0.132132	31	ENSG00000133316	-	WDR74	2185.61	-0.600327
chr11	62880895	62881331	62880888	62880953	5419	0.715781	1.76184e-12	2.4269e-11	10420	62881261	62881352	33	0.750564	0.0617187	0.148371	113	ENSG00000168003	+	SLC3A2	8344.43	0.2934
chr11	63670882	63671418	63671351	63671457	371	-0.195609	0.0739702	0.171263	2137	63670879	63670936	7	0.590283	0.348157	0.53392	42	ENSG00000184743	-	ATL3	3067.47	-0.328597
chr11	63767636	63768774	63768718	63768805	144	-0.214413	0.204254	0.368711	706	63767635	63767689	15	1.50548	0.0394823	0.103594	35	ENSG00000188070	-	C11orf95	342.49	0.376021
chr11	63839125	63839182	63838893	63839203	2387	0.300941	0.000235578	0.0011604	10894	63839131	63839186	8	2.57621	0.0138602	0.0431975	22	ENSG00000072518	+	MARK2	5382.13	0.245957
chr11	63974619	63975017	63974591	63974673	57756	-0.158868	0.0195413	0.0577261	213291	63974971	63975019	13	-0.258848	0.777657	0.877809	21	ENSG00000176340	+	COX8A	5718.67	-0.12571
chr11	63986445	63986755	63986423	63986496	1977	0.210313	0.0197196	0.0581489	10519	63986704	63986775	13	0.735825	0.154531	0.300764	59	ENSG00000167770	+	OTUB1	5876.27	0.129169
chr11	64166237	64166500	64166447	64166549	215	0.73283	2.78548e-08	2.54758e-07	1253	64166062	64166317	101	-0.471156	0.0833001	0.187938	265	ENSG00000133315	-	MACROD1	2259.2	0.985648
chr11	64226280	64226803	64226249	64226354	889	-0.36539	3.99542e-05	0.000229517	6721	64226753	64226807	4	-1.31238	0.0879749	0.196104	34	ENSG00000149761	+	NUDT22	1352.38	-0.469702
chr11	64228140	64230354	64228135	64228182	9	-0.107401	0.915198	0.956757	17	64230330	64230378	9	-0.107109	0.890096	0.942886	29	ENSG00000149761	+	NUDT22	1352.38	-0.469702
chr11	64234583	64235083	64234487	64234660	92	-0.985656	6.68243e-08	5.83099e-07	662	64235019	64235087	14	-0.390387	0.524938	0.697599	47	ENSG00000173511	+	VEGFB	460.404	-1.10733
chr11	64241094	64241251	64240951	64241138	2092	-0.366658	3.92455e-05	0.00022566	24409	64241205	64241256	11	2.36694	0.0113001	0.0362241	25	ENSG00000173486	+	FKBP2	58.6678	0.50809
chr11	64245955	64246240	64245930	64246034	2766	1.6167	1.17594e-65	1.16815e-63	5999	64246093	64246246	54	-1.15652	0.000239915	0.00117963	217	ENSG00000256940	+	PPP1R14B-AS1	213.804	1.36573
chr11	64246318	64246848	64246798	64246966	2452	-0.596847	8.13403e-10	8.83601e-09	17614	64246319	64246368	5	1.16145	0.118842	0.247054	30	ENSG00000173457	-	PPP1R14B	2114.87	-0.564785
chr11	64251545	64252582	64251494	64251568	506	-0.129643	0.240767	0.414	2875	64252509	64252588	145	0.0716293	0.602463	0.757208	1108	ENSG00000149782	+	PLCB3	3996.52	0.236066
chr11	64269270	64270231	64269269	64269332	9	-1.54396	0.0415128	0.107906	39	64270184	64270236	11	-1.20579	0.0747979	0.172749	50	ENSG00000173264	+	GPR137	1699.13	-0.460138
chr11	64285255	64285414	64285228	64285320	83	-1.07078	1.45399e-07	1.21866e-06	546	64285343	64285423	17	-0.843348	0.059211	0.143645	92	ENSG00000173264	+	GPR137	1699.13	-0.460138
chr11	64285504	64285775	64285457	64285619	64	-0.86077	0.00163817	0.00670075	287	64285657	64285776	19	0.098668	0.804004	0.893319	109	ENSG00000173264	+	GPR137	1699.13	-0.460138
chr11	64777873	64778530	64778458	64778560	6059	-0.727478	5.54907e-20	1.23349e-18	25091	64777847	64777947	140	1.03382	1.38629e-06	1.01579e-05	385	ENSG00000168066	-	SF1	10216.1	0.06004
chr11	64809959	64810685	64810480	64810705	1260	-0.481592	3.09337e-07	2.48764e-06	4562	64809912	64810020	4	-0.106728	0.869062	0.931342	39	ENSG00000133895	-	MEN1	2093.35	-0.69966
chr11	64842986	64844636	64844552	64844742	1269	1.91068	4.94527e-118	1.35292e-115	11343	64842959	64843038	40	3.01403	7.1482e-12	9.36142e-11	135	ENSG00000171219	-	CDC42BPG	10636.3	1.83325
chr11	65014170	65014605	65014142	65014222	758	-1.7734	3.8737e-73	4.69823e-71	5554	65014554	65014613	15	-0.297239	0.578183	0.739243	60	ENSG00000213465	+	ARL2	519.948	-1.78732
chr11	65040932	65041365	65040898	65041008	1090	3.17519	7.46383e-175	4.89118e-172	3155	65041320	65041371	17	3.48111	1.80814e-07	1.49973e-06	65	ENSG00000168061	+	SAC3D1	3371.85	1.37551
chr11	65084243	65084365	65084200	65084296	2283	0.384721	5.33613e-06	3.57461e-05	12783	65084313	65084372	3	0.311687	0.671101	0.807879	29	ENSG00000162300	+	ZFPL1	1926.32	0.355926
chr11	65096213	65096663	65096100	65096286	3616	-0.0461888	0.615463	0.767194	12934	65096606	65096669	25	0.506815	0.247478	0.422557	95	ENSG00000149823	+	VPS51	3546.94	-0.400444
chr11	65117005	65117672	65117354	65117693	302	-0.0105882	0.932145	0.965092	2835	65116998	65117048	5	0.685306	0.416584	0.602473	26	ENSG00000174276	-	ZNHIT2	746.051	-0.08222
chr11	65122320	65122618	65122303	65122383	3294	-0.00399218	0.959561	0.979514	12550	65122569	65122619	5	0.37201	0.730324	0.847333	14	ENSG00000149792	+	MRPL49	4878.5	-0.0542635
chr11	65133467	65134518	65134446	65134546	1052	-0.0969509	0.307079	0.491289	5350	65133461	65133517	21	0.680167	0.219734	0.388269	55	ENSG00000162298	-	SYVN1	2410.48	-0.128539
chr11	65181354	65181580	65181200	65181420	89	0.135588	0.329492	0.515269	1245	65181529	65181699	317	0.395335	0.00634639	0.0220445	1011	ENSG00000014216	+	CAPN1	19317.6	0.991277
chr11	65181927	65182397	65181792	65182101	6725	0.868384	5.00379e-27	1.55916e-25	34891	65182348	65182398	9	1.32047	0.147661	0.290727	20	ENSG00000014216	+	CAPN1	19317.6	0.991277
chr11	65182458	65183628	65182450	65182609	355	2.79981	3.76796e-102	7.65693e-100	1908	65183556	65183632	48	3.84391	2.64476e-08	2.42495e-07	71	ENSG00000014216	+	CAPN1	19317.6	0.991277
chr11	65422797	65422996	65422791	65422849	488073	2.96769	1.5716e-174	1.02198e-171	553040	65422922	65422999	17	2.46189	9.661e-07	7.23706e-06	118	ENSG00000245532	+	NEAT1	79543.2	2.80057
chr11	65423063	65423182	65423034	65423113	5022	2.84384	3.88107e-42	2.09892e-40	13495	65423099	65423200	358	3.08246	2.94868e-13	4.30444e-12	3272	ENSG00000245532	+	NEAT1	79543.2	2.80057
chr11	65540017	65540625	65540565	65540656	1224	0.0795753	0.469881	0.649453	7700	65540006	65540075	23	0.0522317	0.899154	0.947625	105	ENSG00000168056	-	LTBP3	4850.64	0.403015
chr11	65540783	65541696	65541658	65541700	4	-1.25843	0.149455	0.293214	25	65540778	65540835	13	0.430829	0.462998	0.643248	46	ENSG00000168056	-	LTBP3	4850.64	0.403015
chr11	65551134	65552123	65552079	65552130	8	0.554459	0.558976	0.724782	19	65551128	65551203	7	1.21666	0.0616597	0.148267	38	ENSG00000168056	-	LTBP3	4850.64	0.403015
chr11	65570057	65570423	65570275	65570430	156	1.73835	4.53331e-36	2.02018e-34	1258	65570056	65570190	10	0.595397	0.220685	0.389341	69	ENSG00000260233	-	ZNRD2-AS1	186.971	1.5065
chr11	65570458	65572449	65570441	65570530	2700	-0.195736	0.0328928	0.0892025	6032	65572401	65572454	42	1.54661	0.00168184	0.00686044	71	ENSG00000173465	+	ZNRD2	1241.89	-0.357408
chr11	65615762	65616051	65615737	65615844	792	0.142093	0.114756	0.240627	6652	65615982	65616069	110	0.202235	0.417413	0.603204	326	ENSG00000197136	+	PCNX3	10859.7	0.216623
chr11	65712251	65712450	65712232	65712305	1655	0.28222	0.0038549	0.0142769	4343	65712383	65712475	13	1.0162	0.044621	0.114469	65	ENSG00000172977	+	KAT5	2327.72	0.523966
chr11	65855173	65857012	65856875	65857046	257	1.33028	2.14296e-17	4.14263e-16	829	65855149	65855244	61	0.972535	0.019713	0.0581336	108	ENSG00000172757	-	CFL1	45421.9	0.142338
chr11	65857318	65857636	65857576	65857643	14	1.06377	0.0637377	0.152173	52	65857306	65857448	55	1.58288	9.13894e-12	1.18401e-10	349	ENSG00000172757	-	CFL1	45421.9	0.142338
chr11	65857752	65858179	65858127	65858196	161247	0.0995967	0.234871	0.406698	231687	65857748	65857805	10	2.74722	0.000215027	0.00106845	42	ENSG00000172757	-	CFL1	45421.9	0.142338
chr11	65859686	65860188	65859669	65859751	15	0.82914	0.0434019	0.11186	100	65860138	65860191	9	-1.07289	0.202975	0.366944	26	ENSG00000172732	+	MUS81	2035.12	0.136413
chr11	65860676	65861274	65860422	65860822	114	-0.119118	0.217844	0.386125	3103	65861109	65861395	94	0.711032	0.000108241	0.000573646	545	ENSG00000172732	+	MUS81	2035.12	0.136413
chr11	65899477	65900387	65900336	65900426	1505	4.79159	1.24908e-289	5.27962e-286	4908	65899424	65899505	9	7.22651	7.72584e-12	1.0096e-10	138	ENSG00000175592	-	FOSL1	1412.53	4.9902
chr11	65919436	65920931	65919400	65919515	4507	-0.640218	4.53513e-13	6.53343e-12	22485	65920884	65920933	14	-1.06788	0.302635	0.486	19	ENSG00000175550	+	DRAP1	3051.87	-0.553714
chr11	65961733	65962057	65961715	65961794	2476	0.0152647	0.869115	0.931375	15857	65961990	65962091	24	1.23576	3.07393e-05	0.000180169	194	ENSG00000175467	+	SART1	8285.36	0.014475
chr11	66002502	66002732	66002472	66002570	4324	-0.831142	4.70079e-29	1.60495e-27	28712	66002658	66002744	7	-0.112759	0.866097	0.929342	41	ENSG00000175334	+	BANF1	5855.34	-0.881092
chr11	66068006	66070007	66069984	66070031	4	0.779808	0.31687	0.502191	28	66067943	66068050	12	0.18452	0.804927	0.893909	33	ENSG00000255038	-	ENSG00000255038	40.4619	2.62085
chr11	66070325	66070857	66070296	66070496	565	0.655996	2.57911e-11	3.21148e-10	6847	66070778	66071000	31	2.2902	5.35338e-15	8.83375e-14	310	ENSG00000175115	+	PACS1	9125.01	0.673537
chr11	66257702	66258408	66257670	66257825	1251	-0.839265	1.88605e-16	3.4163e-15	6973	66258343	66258423	37	0.0352843	0.91326	0.955688	154	ENSG00000174996	+	KLC2	4980.36	-0.746301
chr11	66259327	66261796	66259324	66259377	4	-1.00751	0.382182	0.568616	15	66261749	66261801	4	-0.360026	0.761358	0.867393	13	ENSG00000174996	+	KLC2	4980.36	-0.746301
chr11	66261772	66261912	66261772	66261821	11	-0.244305	0.768816	0.872091	26	66261865	66261917	10	-1.6237	0.113258	0.238197	20	ENSG00000174996	+	KLC2	4980.36	-0.746301
chr11	66268621	66269387	66268614	66268701	3590	0.0304501	0.718983	0.840373	34043	66269249	66269510	36	-1.41645	1.34382e-07	1.13193e-06	307	ENSG00000174903	+	RAB1B	16762.9	0.0162288
chr11	66335601	66336433	66336368	66336448	613	1.8549	1.92752e-68	2.0522e-66	2878	66335602	66335648	16	3.4461	0.0057645	0.0202775	18	ENSG00000174791	-	RIN1	1246.62	1.95296
chr11	66372023	66372475	66372427	66372492	55	-0.568166	0.0874416	0.195188	173	66372021	66372074	11	-2.24453	0.00387685	0.0143497	44	ENSG00000174669	-	SLC29A2	1472.87	-2.40692
chr11	66480015	66480240	66480180	66480258	1979	0.510811	1.2342e-07	1.04391e-06	4566	66479997	66480076	52	-0.882948	0.0118306	0.0376916	162	ENSG00000255517	-	ENSG00000255517	270.795	0.231642
chr11	66616629	66617005	66616618	66616681	17211	-0.310406	0.00015346	0.000786566	27406	66616957	66617017	62	0.695255	0.0325181	0.0883708	177	ENSG00000239306	+	RBM14	4787.49	-0.760408
chr11	66677447	66677876	66677802	66677892	336	-0.202956	0.0648386	0.154239	3446	66677448	66677496	7	2.77431	0.0530016	0.131628	13	ENSG00000173914	-	RBM4B	1403.36	-0.319174
chr11	66744786	66745459	66744694	66744867	375	-1.27823	1.8303e-41	9.64028e-40	4557	66745407	66745462	4	-2.39034	0.0287374	0.079729	23	ENSG00000173715	+	C11orf80	835.721	-1.03363
chr11	66958174	66958382	66958326	66958416	855	-0.43522	0.00115463	0.00489924	2466	66958160	66958218	12	-0.576181	0.385502	0.572004	42	ENSG00000173599	-	PC	1983.38	-0.43733
chr11	67023212	67023614	67023109	67023284	119	0.216792	0.176296	0.331459	817	67023581	67023618	7	0.842021	0.398005	0.584702	19	ENSG00000173227	+	SYT12	1196.53	0.429188
chr11	67056846	67057680	67056833	67056900	18796	1.68108	1.35377e-71	1.56556e-69	41872	67057634	67057681	30	6.00065	1.92719e-07	1.59363e-06	36	ENSG00000173156	+	RHOD	6307.72	1.59683
chr11	67119266	67120308	67119249	67119332	1015	0.0782391	0.401244	0.588066	6690	67120262	67120314	7	3.22896	0.00987029	0.0322671	16	ENSG00000173120	+	KDM2A	10184.3	0.271422
chr11	67266472	67267637	67266387	67266504	2220	0.116018	0.185508	0.343552	17275	67267491	67267647	13	1.59827	0.00173927	0.00706606	72	ENSG00000173020	+	GRK2	9014.35	0.0774977
chr11	67289347	67289349	67289315	67289499	406	0.0667353	0.50057	0.677471	3472	67289324	67289356	19	-0.0296965	0.960562	0.980003	45	ENSG00000172932	+	ANKRD13D	2575.86	0.070868
chr11	67303556	67304017	67303441	67303638	4831	0.0231623	0.764061	0.869019	19021	67303943	67304023	29	-0.573422	0.171375	0.324844	108	ENSG00000172830	+	SSH3	6113.37	-0.0843547
chr11	67317290	67317453	67317388	67317476	31	-0.403371	0.146373	0.288859	233	67317259	67317340	137	0.784064	0.00126117	0.00530577	303	ENSG00000287851	-	ENSG00000287851	16.8451	0.0525611
chr11	67352701	67353299	67353224	67353332	391	0.462457	0.000510332	0.00235077	1291	67352699	67352752	3	0.854778	0.423008	0.607874	14	ENSG00000175482	-	POLD4	1693.48	1.00837
chr11	67353386	67353519	67353468	67353560	4052	1.02879	1.68934e-38	8.09582e-37	21821	67353372	67353433	10	2.20136	0.0104564	0.0339039	26	ENSG00000175482	-	POLD4	1693.48	1.00837
chr11	67373204	67373597	67373546	67373779	988	0.576015	1.38316e-08	1.31039e-07	3693	67373185	67373272	61	1.05211	0.000109064	0.000577429	251	ENSG00000175505	-	CLCF1	676.255	0.525967
chr11	67373915	67374097	67374034	67374271	198	1.40607	4.43582e-23	1.15523e-21	1069	67373914	67373962	10	0.0466533	0.963451	0.981598	18	ENSG00000175505	-	CLCF1	676.255	0.525967
chr11	67443574	67443806	67443602	67443823	92	-0.440634	0.0390434	0.102636	456	67443533	67443638	71	0.452317	0.00922774	0.0304741	657	ENSG00000172725	-	CORO1B	12138.1	0.648998
chr11	67464816	67465257	67465209	67465293	316	3.78631	2.85546e-100	5.60067e-98	1225	67464785	67465005	310	2.60994	2.86838e-72	3.34919e-70	1968	ENSG00000172663	-	TMEM134	1935.82	0.520927
chr11	67468180	67469232	67469162	67469278	2032	0.551502	1.78976e-09	1.88112e-08	11018	67468174	67468319	12	1.39948	0.00261845	0.0101657	84	ENSG00000172663	-	TMEM134	1935.82	0.520927
chr11	67483134	67483271	67483021	67483199	1631	-1.05131	4.42498e-27	1.38442e-25	5946	67483223	67483281	7	1.75118	0.076343	0.175564	21	ENSG00000110711	+	AIP	2473.23	-0.642429
chr11	67508416	67508641	67508589	67508675	456	-0.0561125	0.594448	0.751368	3162	67508417	67508501	19	1.63033	0.000637472	0.00287165	90	ENSG00000167797	-	CDK2AP2	2003.83	-0.189948
chr11	68030691	68030898	68030663	68030744	4504	-0.486818	4.25148e-10	4.74836e-09	18265	68030849	68030904	8	0.00742416	0.993916	0.996947	20	ENSG00000110717	+	NDUFS8	3333.45	-0.562696
chr11	68035694	68036301	68035694	68035741	10	1.66183	0.210301	0.376732	10	68036251	68036306	5	-0.1923	0.874378	0.934367	12	ENSG00000110717	+	NDUFS8	3333.45	-0.562696
chr11	68120835	68121387	68121335	68121452	1222	0.515695	6.88062e-06	4.52654e-05	2516	68120833	68120886	21	0.874919	0.0868072	0.194082	62	ENSG00000110721	-	CHKA	1619.73	0.60664
chr11	68213065	68213851	68213569	68213869	1273	1.12244	6.88646e-41	3.56493e-39	17083	68213018	68213065	7	2.5008	0.0109552	0.0352654	21	ENSG00000110066	-	KMT5B	5424.28	0.954504
chr11	68460751	68461456	68460723	68460798	6690	0.335644	6.39767e-05	0.000354575	16066	68461406	68461457	14	0.941424	0.162703	0.312589	34	ENSG00000110075	+	PPP6R3	8180.17	0.241451
chr11	68839479	68841018	68840972	68841025	5	1.52066	0.106798	0.227815	19	68839399	68839537	41	1.37029	2.64968e-05	0.000157096	159	ENSG00000110090	-	CPT1A	9843.37	0.50106
chr11	68841800	68841915	68841786	68841966	1727	0.448222	1.57319e-07	1.31349e-06	5882	68841795	68841843	20	1.75155	0.00060899	0.00275701	67	ENSG00000110090	-	CPT1A	9843.37	0.50106
chr11	69480836	69481544	69481497	69481553	23	-0.302601	0.552964	0.720257	66	69480833	69480888	11	1.81134	0.00462371	0.0167153	44	ENSG00000255774	-	LINC02747	1119.42	-0.439544
chr11	69641155	69641455	69641145	69641221	52761	0.992586	1.4246e-05	8.88979e-05	82417	69641404	69641463	8	2.17094	0.0027703	0.0106785	39	ENSG00000110092	+	CCND1	71706.3	1.0571
chr11	69643613	69643835	69643540	69643674	23	1.44829	2.79788e-06	1.95732e-05	193	69643675	69643921	72	3.50116	1.37366e-35	6.03866e-34	409	ENSG00000110092	+	CCND1	71706.3	1.0571
chr11	70203314	70203890	70203290	70203382	1550	-0.221194	0.00826699	0.0276984	11292	70203839	70203980	18	0.68257	0.0363863	0.0968141	165	ENSG00000168040	+	FADD	3672.58	-0.232056
chr11	70270735	70271115	70270712	70270809	7273	0.843229	1.67095e-24	4.6619e-23	23752	70271070	70271120	8	1.18474	0.167343	0.319301	22	ENSG00000131626	+	PPFIA1	7532.68	0.690194
chr11	70271218	70271717	70271216	70271268	11	0.642413	0.391257	0.577966	31	70271638	70271719	10	1.57909	0.0148679	0.0458496	42	ENSG00000131626	+	PPFIA1	7532.68	0.690194
chr11	70398540	70399916	70398525	70398613	16145	0.649356	2.90126e-18	5.88014e-17	88368	70399867	70399917	4	2.03398	0.0356704	0.0952774	21	ENSG00000085733	+	CTTN	27401.7	0.656237
chr11	71251937	71252779	71252721	71252860	330	0.533658	8.08613e-05	0.000438917	1673	71251934	71252014	11	2.36664	0.000658128	0.00295462	44	ENSG00000162105	-	SHANK2	2536.66	1.77277
chr11	71447522	71448355	71448294	71448442	2755	-0.523625	2.1056e-08	1.95217e-07	23887	71447517	71447570	6	-1.18267	0.19364	0.354631	24	ENSG00000172893	-	DHCR7	12512.4	-0.684094
chr11	71480147	71481424	71480072	71480197	151	1.89045	3.07925e-13	4.48729e-12	307	71481376	71481437	10	-1.97889	0.00728979	0.0248688	43	ENSG00000172890	+	NADSYN1	13166.5	2.14402
chr11	72080334	72080533	72080349	72080548	243	-1.24587	2.12573e-36	9.59428e-35	3757	72080318	72080388	17	0.474713	0.222124	0.391188	109	ENSG00000137497	-	NUMA1	13445.9	-0.693474
chr11	72080849	72082039	72081991	72082046	8	0.392955	0.625834	0.775141	24	72080631	72080920	71	0.155199	0.327053	0.512905	782	ENSG00000137497	-	NUMA1	13445.9	-0.693474
chr11	72112511	72112775	72112640	72112793	1078	0.307108	0.00147682	0.00610733	9655	72112507	72112558	4	1.14992	0.135826	0.272936	29	ENSG00000110200	-	ANAPC15	1901.82	0.111993
chr11	72223384	72223775	72223280	72223465	118	0.585203	0.00024475	0.00120187	822	72223713	72223792	11	-0.115395	0.790341	0.885357	88	ENSG00000165458	+	INPPL1	9432.05	-0.548832
chr11	72223893	72225117	72223866	72223976	1017	-0.749833	3.18176e-16	5.67695e-15	5493	72225069	72225143	12	-0.19613	0.652951	0.794992	96	ENSG00000165458	+	INPPL1	9432.05	-0.548832
chr11	72780825	72781247	72781164	72781283	4158	0.88171	6.55237e-26	1.95176e-24	33123	72780798	72780925	15	5.18835	3.41567e-11	4.21345e-10	114	ENSG00000214530	-	STARD10	20717.7	0.0426394
chr11	72781322	72781838	72781833	72781919	3653	0.345666	0.000476652	0.00220972	20850	72781319	72781428	19	1.68915	0.000562076	0.00256564	81	ENSG00000214530	-	STARD10	20717.7	0.0426394
chr11	72781997	72782882	72782592	72782905	1308	-0.979942	6.18411e-20	1.37105e-18	7107	72781984	72782150	19	-0.754673	0.0585464	0.142409	130	ENSG00000214530	-	STARD10	20717.7	0.0426394
chr11	72793831	72794046	72793988	72794071	1151	-0.0372733	0.765307	0.86991	2426	72793747	72793897	117	0.317247	0.111049	0.234651	480	ENSG00000214530	-	STARD10	20717.7	0.0426394
chr11	72814431	72814644	72814389	72814482	461	-0.511533	0.000302304	0.00145799	1471	72814597	72814651	10	-0.469225	0.505734	0.681818	36	ENSG00000168010	+	ATG16L2	1327.23	0.0224415
chr11	73141976	73142065	73142015	73142094	70	0.387311	0.160572	0.309628	217	73141971	73142049	5	0.690924	0.311249	0.495864	33	ENSG00000137478	-	FCHSD2	847.18	-0.524476
chr11	73218281	73218512	73218271	73218429	490	0.0553721	0.647876	0.791308	2695	73218467	73218515	14	1.42474	0.0646848	0.153906	27	ENSG00000175591	+	P2RY2	2103.95	0.112321
chr11	73308292	73309253	73308253	73308353	56	-0.418721	0.0422065	0.109309	482	73309179	73309472	21	2.44155	4.56811e-18	9.14878e-17	265	ENSG00000110237	+	ARHGEF17	1877.28	-0.100492
chr11	73597940	73598111	73598038	73598206	1515	0.184523	0.0679353	0.160038	5560	73597935	73597961	20	1.52512	0.0613304	0.147677	25	ENSG00000054965	-	FAM168A	4528.01	0.0657056
chr11	73760312	73761073	73760918	73761162	1877	0.428939	4.21843e-06	2.87056e-05	6088	73760297	73760364	22	-0.100762	0.857576	0.925297	58	ENSG00000175582	-	RAB6A	7794.81	0.301045
chr11	73787890	73788086	73787866	73787950	1183	-0.128086	0.182377	0.339403	5971	73788047	73788118	17	-0.635385	0.08367	0.188587	153	ENSG00000175581	+	MRPL48	870.088	-0.179657
chr11	73876705	73876833	73876759	73876872	4179	-0.36612	6.00179e-06	3.98748e-05	19569	73876693	73876758	9	2.62716	0.00083479	0.00365846	34	ENSG00000181924	-	COA4	2920.98	-0.530338
chr11	74493379	74493687	74493258	74493458	227	0.331819	0.0234731	0.0673656	892	74493635	74493743	211	-0.224767	0.114655	0.240454	1008	ENSG00000254837	+	ENSG00000254837	292.046	0.235621
chr11	74748866	74749394	74748844	74748920	1977	0.417741	5.4207e-06	3.62621e-05	6321	74749343	74749422	7	0.706658	0.27463	0.454105	38	ENSG00000166439	+	RNF169	2017.14	0.513302
chr11	75428485	75430198	75430134	75430211	25	-0.294128	0.299367	0.482271	250	75428474	75428532	3	0.669904	0.438997	0.621789	22	ENSG00000149243	-	KLHL35	182.335	0.00899
chr11	75562142	75562195	75562112	75562195	69	-1.26847	1.21879e-09	1.30041e-08	532	75562147	75562202	9	-0.843726	0.312024	0.496756	27	ENSG00000149257	+	SERPINH1	5433.19	-1.82855
chr11	75562252	75562734	75562246	75562382	2845	-1.88666	2.46656e-72	2.892e-70	5217	75562683	75562749	102	-0.379306	0.171193	0.32461	259	ENSG00000149257	+	SERPINH1	5433.19	-1.82855
chr11	76445024	76445536	76445008	76445096	264	-0.174951	0.12755	0.260253	1763	76445476	76445545	32	3.11769	1.04543e-09	1.12352e-08	98	ENSG00000158636	+	EMSY	1857.56	-0.245863
chr11	76783356	76783857	76783248	76783407	4822	1.21274	7.21617e-33	2.87613e-31	8918	76783802	76783879	20	3.24337	1.4319e-08	1.35293e-07	82	ENSG00000182704	+	TSKU	3458.56	1.32138
chr11	78417085	78417819	78417751	78417961	149	-0.922334	7.38808e-09	7.24546e-08	855	78417080	78417222	19	0.194819	0.626522	0.775651	113	ENSG00000033327	-	GAB2	613.901	-1.20775
chr11	83286119	83286366	83286284	83286400	239	0.366359	0.00287557	0.0110339	1396	83286117	83286168	7	-2.3624	0.0270955	0.0759464	24	ENSG00000137500	-	CCDC90B	1882.08	1.30459
chr11	84720786	84720893	84720787	84720835	9	0.435172	0.761938	0.867572	10	84720844	84720920	5	-1.7047	0.0258156	0.0729194	37	ENSG00000254787	+	ENSG00000254787	1.455	-0.169953
chr11	85664341	85664711	85664516	85664732	60	-0.277556	0.0530722	0.131778	1075	85664322	85664425	24	0.243082	0.54319	0.712924	108	ENSG00000137504	-	CREBZF	6045.96	-0.330959
chr11	85664701	85665109	85664913	85665135	4504	-0.195488	0.0122872	0.0389452	13437	85664702	85664752	7	-0.547301	0.534215	0.705411	23	ENSG00000137504	-	CREBZF	6045.96	-0.330959
chr11	85810604	85811140	85811061	85811161	40864	0.543347	1.38795e-12	1.92789e-11	71434	85810600	85810655	6	-1.34936	0.171901	0.325578	21	ENSG00000137501	-	SYTL2	32370.7	0.479241
chr11	86244788	86244970	86244751	86244841	1846	0.14211	0.103529	0.222383	7617	86244922	86245187	18	-0.0617772	0.827897	0.907444	217	ENSG00000074266	+	EED	1599.66	-0.169859
chr11	93784281	93784838	93784276	93784362	391	0.080577	0.552765	0.720164	1183	93784793	93784855	11	0.598323	0.258069	0.435494	56	ENSG00000042429	+	MED17	272.753	0.0351633
chr11	94128842	94129494	94128839	94129024	71	-0.272739	0.107305	0.228614	735	94129422	94129501	27	-0.150581	0.553835	0.720891	274	ENSG00000110218	+	PANX1	529.744	-0.452441
chr11	95067193	95067472	95066914	95067303	79	-0.0525198	0.741828	0.854679	763	95067389	95067475	7	2.86676	1.81274e-05	0.000110852	52	ENSG00000263465	+	SRSF8	1116.5	-0.0840564
chr11	95067486	95068718	95067455	95067624	80	-0.661489	2.55573e-05	0.000151967	989	95068675	95068727	9	0.81508	0.371697	0.557985	21	ENSG00000263465	+	SRSF8	1116.5	-0.0840564
chr11	95790538	95791036	95790487	95790578	339	-1.62532	5.63398e-41	2.92193e-39	2058	95790987	95791037	14	-1.75517	0.0506696	0.126916	28	ENSG00000166037	+	CEP57	617.012	-1.67604
chr11	100687287	100687931	100687269	100687542	28	1.38403	9.52646e-11	1.13044e-09	413	100687853	100687945	19	3.00551	9.75937e-08	8.34532e-07	79	ENSG00000165895	+	ARHGAP42	316.278	1.16494
chr11	101128374	101129798	101129671	101129818	117	-1.78184	1.91509e-22	4.81398e-21	771	101128352	101128423	9	-1.84614	0.0106344	0.0343836	45	ENSG00000082175	-	PGR	1003.05	-2.07378
chr11	102110449	102112094	102110420	102110801	345	0.599347	5.04596e-07	3.9402e-06	2227	102112048	102112115	56	4.27168	6.26604e-09	6.2041e-08	77	ENSG00000137693	+	YAP1	2241.09	0.548058
chr11	107908404	107908719	107908397	107908455	256	-0.105715	0.559092	0.724843	648	107908660	107908720	2	-1.13917	0.389852	0.576516	12	ENSG00000240652	+	ENSG00000240652	154.729	0.181834
chr11	108008918	108009292	108008825	108009022	129	-0.372313	0.0267124	0.0750443	716	108009241	108009326	119	0.671713	0.000363448	0.00172277	524	ENSG00000166266	+	CUL5	1062.13	-0.483628
chr11	108498109	108498383	108498267	108498422	121	-2.56617	4.70924e-29	1.60719e-27	717	108498102	108498174	6	-1.38373	0.0260328	0.0734281	55	ENSG00000178202	-	POGLUT3	539.353	-2.85328
chr11	110295739	110296611	110296533	110296714	9310	-0.0384357	0.686983	0.81895	45972	110295737	110295789	13	-1.36036	0.0171538	0.0517527	61	ENSG00000137710	-	RDX	11189.7	0.0221685
chr11	111878980	111879162	111879113	111879182	75	-0.124706	0.651928	0.794279	227	111878950	111879046	13	-0.338156	0.378913	0.565224	113	ENSG00000255561	-	FDXACB1	28.6562	-0.703886
chr11	114400094	114400457	114400325	114400558	247	0.619004	6.82391e-07	5.22666e-06	1399	114400027	114400101	11	-1.52179	0.00538906	0.0191077	73	ENSG00000180425	-	C11orf71	336.679	0.385185
chr11	117796108	117797192	117797141	117797227	37	3.14191	4.66588e-19	9.88311e-18	224	117796107	117796155	9	3.67623	0.00611747	0.0213485	13	ENSG00000177103	-	DSCAML1	75.967	3.76068
chr11	118436496	118437239	118436472	118436737	641	-0.599776	4.71733e-06	3.18594e-05	2331	118437191	118437244	6	-1.51523	0.151742	0.296738	19	ENSG00000118058	+	KMT2A	4071.73	-0.326565
chr11	118530669	118530890	118530841	118530972	43	1.69891	1.29158e-08	1.22887e-07	209	118530636	118530737	23	0.396369	0.103867	0.222997	307	ENSG00000255435	-	ENSG00000255435	117.468	0.857671
chr11	118530999	118531140	118531069	118531165	241	0.807746	6.829e-06	4.49608e-05	672	118530998	118531087	7	-1.05651	0.074633	0.172453	56	ENSG00000255435	-	ENSG00000255435	117.468	0.857671
chr11	118572408	118572766	118572388	118572477	5617	0.129945	0.0917879	0.202658	34807	118572701	118572785	18	0.907987	0.00255088	0.009931	181	ENSG00000095139	+	ARCN1	12876.2	0.0412388
chr11	118791030	118791163	118791096	118791190	3195	-0.395383	5.90398e-06	3.92651e-05	31505	118791025	118791079	10	0.771183	0.160583	0.309642	55	ENSG00000110367	-	DDX6	9525.39	-0.364779
chr11	118791254	118791714	118791227	118791365	101	1.23477	9.79833e-10	1.05706e-08	546	118791649	118791819	76	-1.21415	2.45614e-08	2.26204e-07	437	ENSG00000278376	+	ENSG00000278376	88.7581	0.745135
chr11	118911285	118911288	118911228	118911325	72	0.461908	0.034811	0.0933861	392	118911270	118911346	35	0.402449	0.325397	0.511249	102	ENSG00000186174	-	BCL9L	20113.1	0.575764
chr11	118925165	118925506	118925347	118925627	114	0.634376	0.00275727	0.010637	435	118925116	118925218	106	0.828108	3.20042e-05	0.000186909	439	ENSG00000186174	-	BCL9L	20113.1	0.575764
chr11	118925630	118925925	118925874	118926076	29809	0.38481	2.32996e-07	1.90287e-06	59783	118925561	118925677	11	1.4414	0.0737076	0.170764	27	ENSG00000186174	-	BCL9L	20113.1	0.575764
chr11	118956297	118958406	118956293	118956348	1019	1.25456	1.11806e-19	2.44925e-18	1223	118958360	118958409	10	0.953505	0.341957	0.527734	17	ENSG00000110375	+	UPK2	474.816	1.34843
chr11	119084913	119085104	119084862	119084968	884	-0.934456	1.65454e-26	5.04575e-25	9034	119085057	119085131	20	-0.0591738	0.891389	0.943612	86	ENSG00000256269	+	HMBS	2125.93	-0.957536
chr11	119094915	119095464	119095416	119095476	53528	-1.64756	1.29774e-82	1.86574e-80	78890	119094912	119094970	6	-0.966154	0.123782	0.254747	46	ENSG00000188486	-	H2AX	10414	-1.63998
chr11	119101492	119101852	119101696	119101879	985	-1.34879	3.43397e-52	2.45803e-50	5315	119101473	119101567	22	-0.941496	0.0233098	0.0669605	109	ENSG00000172269	-	DPAGT1	1767.54	-1.34416
chr11	119102248	119102358	119102187	119102302	15	0.0697608	0.888119	0.941742	74	119102310	119102362	9	-0.400809	0.627406	0.776244	25	ENSG00000172375	+	C2CD2L	1489.58	-0.182029
chr11	119107343	119108330	119107339	119107511	485	-0.0145535	0.916761	0.957684	1289	119108271	119108331	2	-1.13099	0.262822	0.440738	20	ENSG00000172375	+	C2CD2L	1489.58	-0.182029
chr11	119107934	119108601	119108556	119108608	5	-4.25931	0.000867366	0.00378776	19	119107926	119107981	3	-0.0143802	0.98958	0.994591	14	ENSG00000172269	-	DPAGT1	1767.54	-1.34416
chr11	123062631	123062991	123062608	123062710	65	2.31491	3.98694e-28	1.30585e-26	533	123062943	123062994	6	-1.91865	0.162856	0.312826	12	ENSG00000288061	+	ENSG00000288061	26.9329	1.94673
chr11	124799832	124800403	124800336	124800420	169	0.0445262	0.804678	0.893798	644	124799832	124799883	20	1.21267	0.0187579	0.0558036	69	ENSG00000120458	-	MSANTD2	228.738	-0.0568053
chr11	124800441	124800667	124800436	124800495	17	1.40512	0.00298789	0.0114142	78	124800615	124800674	6	-0.20125	0.815845	0.900346	23	ENSG00000245498	+	ENSG00000245498	107.052	1.13762
chr11	125887699	125888154	125887593	125887771	458	-1.18661	1.66407e-17	3.23537e-16	1940	125888100	125888157	10	-0.751939	0.207109	0.372546	56	ENSG00000198331	+	HYLS1	389.324	-1.17363
chr11	126304061	126304298	126304045	126304115	512	-1.29986	7.81636e-23	2.00962e-21	1574	126304247	126304333	67	-1.14063	3.07458e-06	2.13937e-05	357	ENSG00000110063	+	DCPS	708.256	-1.11529
chr11	130314494	130314906	130314742	130314927	57	0.333259	0.157318	0.304877	383	130314494	130314568	29	0.0340884	0.935666	0.96693	94	ENSG00000196323	-	ZBTB44	1005.58	0.398667
chr11	134224102	134224546	134224482	134224563	77	-0.405918	0.122937	0.253471	272	134224102	134224152	8	-0.146415	0.877537	0.936235	19	ENSG00000151503	-	NCAPD3	1528.13	-1.93528
chr11	134224670	134225453	134224651	134224744	170	-0.299468	0.0279717	0.0779706	1263	134225393	134225466	42	-0.683802	0.0564797	0.138385	142	ENSG00000151502	+	VPS26B	1619.2	-0.346139
chr12	66779	67068	66760	66879	13	7.56624	1.13464e-12	1.58646e-11	106	66989	67070	16	6.78979	5.54228e-10	6.12607e-09	62	ENSG00000120645	+	IQSEC3	134.902	7.2375
chr12	389346	389573	389327	389399	24	0.715508	0.0262221	0.0738485	163	389405	389601	81	0.155186	0.369461	0.555625	661	ENSG00000120647	+	CCDC77	237.457	-0.754441
chr12	990555	991120	991069	991194	89	0.0415199	0.841607	0.91621	474	990539	990597	8	-1.50863	0.0228735	0.0658908	51	ENSG00000250132	-	ENSG00000250132	50.807	-0.379795
chr12	1594307	1594844	1594765	1594877	371	-0.601727	2.84375e-07	2.29806e-06	3638	1594301	1594372	10	-0.564676	0.301871	0.485123	72	ENSG00000171823	-	FBXL14	699.028	-0.53859
chr12	1691061	1691561	1691030	1691124	492	-0.181583	0.0316713	0.0864551	5825	1691511	1691564	11	-0.0163308	0.986852	0.993133	17	ENSG00000006831	+	ADIPOR2	5026.71	-0.381127
chr12	2795024	2795882	2794988	2795077	11113	-0.826435	6.76255e-24	1.83054e-22	41919	2795836	2795904	10	-1.24777	0.144371	0.285859	29	ENSG00000004478	+	FKBP4	17668.5	-1.00763
chr12	2812676	2812894	2812639	2812753	258	-0.0577364	0.649066	0.792136	1630	2812845	2812919	70	0.577273	0.033504	0.0904974	236	ENSG00000111203	+	ITFG2	750.072	0.0589073
chr12	2876923	2877121	2876986	2877176	438	-3.74781	3.9258e-181	2.67638e-178	6648	2876924	2876970	7	-2.82198	0.0502057	0.125985	13	ENSG00000111206	-	FOXM1	2762.54	-4.04542
chr12	2877222	2877650	2877215	2877276	1661	-2.04308	4.04744e-90	6.61808e-88	3953	2877604	2877656	8	-3.82408	0.00183096	0.00739452	24	ENSG00000171792	+	RHNO1	915.662	-1.73994
chr12	2959343	2959834	2959290	2959463	203	-2.40257	1.24187e-52	9.02688e-51	1459	2959810	2959886	8	-3.6158	0.000149062	0.000766443	52	ENSG00000197905	+	TEAD4	434.416	-2.36855
chr12	2959943	2960047	2959922	2959993	44	-2.48112	2.08231e-07	1.71369e-06	133	2959981	2960077	21	-2.47891	1.03056e-09	1.10811e-08	175	ENSG00000197905	+	TEAD4	434.416	-2.36855
chr12	5290476	5290958	5290473	5290528	10	-1.37876	0.0715928	0.166837	36	5290912	5290974	51	-0.155453	0.659264	0.799557	136	ENSG00000256417	+	ENSG00000256417	118.766	-0.108391
chr12	6200399	6201257	6200361	6200450	7823	-0.141441	0.0402837	0.105271	31959	6201207	6201313	12	-0.00737478	0.985544	0.992329	98	ENSG00000010278	+	CD9	10458.6	-0.168002
chr12	6340393	6342003	6341952	6342116	7545	0.445601	1.746e-08	1.63473e-07	24360	6340388	6340441	8	0.545297	0.474957	0.654234	27	ENSG00000067182	-	TNFRSF1A	5143.48	0.40447
chr12	6363471	6364174	6364117	6364176	24	0.565942	0.292571	0.47439	55	6363450	6363534	75	0.903566	0.00278421	0.0107262	189	ENSG00000111319	-	SCNN1A	2120.57	-0.759535
chr12	6375198	6375562	6375386	6375578	992	-0.618383	6.94527e-10	7.60033e-09	3940	6375173	6375306	7	-1.03957	0.00595521	0.0208624	137	ENSG00000111319	-	SCNN1A	2120.57	-0.759535
chr12	6384167	6384904	6383964	6384238	4262	0.465	1.78073e-09	1.87257e-08	22627	6384858	6384908	11	-0.756982	0.35952	0.545047	26	ENSG00000111321	+	LTBR	7997.73	0.359687
chr12	6493376	6493798	6493748	6493817	2160	-0.796712	6.30506e-20	1.3964e-18	6527	6493351	6493428	195	0.276329	0.0525817	0.130807	1054	ENSG00000111639	-	MRPL51	3225.49	-0.797266
chr12	6534516	6535322	6534510	6534569	188757	-0.084119	0.330917	0.516821	351044	6535273	6535327	3	3.0031	0.0208145	0.0608366	14	ENSG00000111640	+	GAPDH	69069	-0.222312
chr12	6536493	6537355	6536493	6536552	437	-0.657602	0.00222239	0.00877702	702	6537306	6537360	5	0.498352	0.590439	0.748181	19	ENSG00000111640	+	GAPDH	69069	-0.222312
chr12	6563718	6566167	6566119	6566228	16	-1.35057	0.0145912	0.0451247	75	6563713	6563770	4	-0.941575	0.350832	0.536424	18	ENSG00000111641	-	NOP2	87.3104	-0.606486
chr12	6568370	6570253	6570206	6570257	12	-0.741354	0.179377	0.335381	64	6568352	6568451	54	1.61541	1.63241e-11	2.06861e-10	371	ENSG00000111641	-	NOP2	87.3104	-0.606486
chr12	6613205	6614421	6614379	6614426	7	-1.48247	0.0974511	0.212358	28	6613199	6613253	11	-1.82114	0.00786554	0.0265374	50	ENSG00000111642	-	CHD4	904.851	-0.399298
chr12	6689088	6689509	6689222	6689604	156	1.14007	2.015e-30	7.26086e-29	2721	6688960	6689145	23	0.451069	0.100945	0.218014	228	ENSG00000126746	-	ZNF384	2143.66	-6.05097e-05
chr12	6766362	6766946	6766351	6766731	6375	-1.23996	5.15286e-40	2.61152e-38	14191	6766895	6766950	5	0.974299	0.172064	0.325785	35	ENSG00000159335	+	PTMS	4897.36	-1.30685
chr12	6852133	6852368	6852101	6852213	1194	-0.745591	6.12678e-15	1.00726e-13	15263	6852297	6852374	8	0.351329	0.588535	0.746764	41	ENSG00000111667	+	USP5	6388.43	-0.846721
chr12	6867530	6868062	6867517	6867580	36903	-0.651303	3.4901e-17	6.65702e-16	41540	6868017	6868067	9	-1.06387	0.220283	0.388862	26	ENSG00000111669	+	TPI1	5343.21	-0.835005
chr12	6914579	6914775	6914556	6914646	76	-1.99449	5.41547e-17	1.0196e-15	451	6914728	6914776	9	-0.888992	0.565303	0.729227	22	ENSG00000111674	+	ENO2	813.31	-2.07906
chr12	6927800	6928425	6927676	6927880	431	-0.0850445	0.542535	0.712414	2538	6928379	6928428	22	-0.442106	0.472498	0.651983	45	ENSG00000111676	+	ATN1	4708.48	-0.392318
chr12	6936878	6937998	6936223	6936954	241	-0.807669	1.00241e-08	9.67788e-08	1789	6937927	6937999	11	-0.487876	0.331073	0.51692	74	ENSG00000111676	+	ATN1	4708.48	-0.392318
chr12	6943816	6944629	6943812	6943867	3812	-0.634419	5.1632e-11	6.26761e-10	4486	6944570	6944654	39	-1.87224	3.72137e-10	4.17726e-09	270	ENSG00000111678	+	C12orf57	1293.85	-0.886199
chr12	6944022	6944815	6944011	6944163	2399	-0.827784	2.22083e-31	8.39626e-30	15624	6944768	6944816	9	-1.70014	0.104073	0.223355	21	ENSG00000111678	+	C12orf57	1293.85	-0.886199
chr12	6963229	6963589	6963205	6963283	2944	0.900588	2.7561e-28	9.11184e-27	20948	6963542	6963592	6	0.226154	0.835385	0.912192	13	ENSG00000257084	+	MIR200CHG	109.286	1.36026
chr12	9064348	9065083	9065019	9065119	35	0.137984	0.561502	0.726587	337	9064334	9064419	9	0.807431	0.0272638	0.0763271	121	ENSG00000214851	-	LINC00612	10.7086	1.76572
chr12	9447981	9448193	9448140	9448238	297	-2.29127	5.72575e-70	6.37723e-68	2080	9447977	9448034	66	-1.60982	6.48161e-06	4.28338e-05	177	ENSG00000214826	-	DDX12P	436.703	-2.02479
chr12	9448294	9448773	9448291	9448348	14	-0.423808	0.492242	0.669846	45	9448728	9448828	16	-4.6119	6.25706e-05	0.000347192	40	ENSG00000284634	+	ENSG00000284634	17.7709	-2.04514
chr12	9648122	9648234	9648090	9648187	78	-0.586334	0.00111973	0.00476911	676	9648194	9648243	21	0.985129	0.0792807	0.180815	53	ENSG00000256594	+	ENSG00000256594	126.722	-0.986251
chr12	10722604	10723096	10723043	10723102	239	0.825679	2.78654e-07	2.25462e-06	789	10722602	10722662	10	4.05059	1.20204e-06	8.89412e-06	54	ENSG00000060138	-	YBX3	6097.4	0.819242
chr12	10722862	10723322	10723272	10723391	24185	0.917677	4.41373e-16	7.79442e-15	40142	10722851	10722904	3	3.67454	0.00245525	0.0095958	21	ENSG00000060138	-	YBX3	6097.4	0.819242
chr12	11171194	11171609	11171167	11171263	2711	-0.144335	0.0698886	0.163578	18109	11171560	11171625	212	-0.237139	0.0991932	0.215237	1050	ENSG00000256537	+	SMIM10L1	1617.84	-0.392522
chr12	12562350	12562862	12562791	12562881	1358	1.49926	3.10092e-47	1.95773e-45	2674	12562350	12562400	6	0.486812	0.617438	0.768759	20	ENSG00000111266	-	DUSP16	3823.08	1.03508
chr12	12696269	12696683	12696266	12696320	8	-0.992558	0.162809	0.312758	36	12696637	12696686	5	-0.803937	0.365724	0.551742	23	ENSG00000111276	+	CDKN1B	4104.04	-0.356115
chr12	12725919	12726106	12725785	12726062	92	-3.22544	2.48259e-32	9.68028e-31	601	12726054	12726113	7	-0.4431	0.540865	0.710938	31	ENSG00000178878	+	APOLD1	232.064	-0.385913
chr12	12891561	12891683	12891557	12891614	6948	0.875344	7.70608e-34	3.17003e-32	13978	12891634	12891686	9	2.13896	0.046882	0.11916	17	ENSG00000013588	+	GPRC5A	16674.8	1.03522
chr12	14567478	14567802	14567651	14567924	148	-1.87656	2.20135e-42	1.20138e-40	1645	14567461	14567519	32	-1.15425	0.0202186	0.0593864	79	ENSG00000121316	-	PLBD1	287.401	-2.14175
chr12	14774404	14774851	14774370	14774456	53519	-0.191584	0.0139686	0.043489	110601	14774785	14774858	5	0.820795	0.294982	0.477181	26	ENSG00000246705	+	H2AJ	7411.38	-0.296737
chr12	19439491	19440060	19439485	19439743	1200	-0.038861	0.684286	0.817152	7859	19439896	19440063	24	0.0159068	0.971784	0.985218	103	ENSG00000139154	+	AEBP2	997.875	-0.125428
chr12	21775099	21775599	21775554	21775604	18	-0.933494	0.220083	0.388666	32	21775100	21775148	7	-0.712407	0.570219	0.733195	13	ENSG00000121361	-	KCNJ8	348.633	-2.28113
chr12	22544294	22544510	22544434	22544541	129	-0.91602	3.76075e-07	2.98992e-06	663	22544275	22544341	11	0.968385	0.125192	0.256719	42	ENSG00000111731	-	C2CD5	1102.77	-1.12036
chr12	25958681	25959379	25959333	25959382	24	0.828091	0.213996	0.381355	38	25958598	25958972	94	0.240159	0.117571	0.245081	842	ENSG00000246695	-	RASSF8-AS1	144.246	1.4461
chr12	27710400	27710706	27710684	27710740	4	0.0750354	0.912746	0.955363	34	27710343	27710401	5	1.26218	0.04131	0.107465	42	ENSG00000256377	-	ENSG00000256377	0.502324	0.318255
chr12	27780260	27780717	27779876	27780330	81	-0.937741	1.15143e-13	1.73382e-12	1614	27780668	27780722	10	0.352598	0.705246	0.831212	18	ENSG00000087448	+	KLHL42	1481.36	-0.988244
chr12	28190455	28190911	28190424	28190526	318	-0.134842	0.279871	0.459984	1484	28190729	28190932	48	0.973017	3.91562e-05	0.000225185	300	ENSG00000123106	+	CCDC91	648.804	-0.331548
chr12	29380729	29381174	29381109	29381191	636	-0.666855	5.82433e-11	7.04184e-10	4162	29380689	29380744	3	0.0437522	0.957015	0.978191	25	ENSG00000087502	-	ERGIC2	1485.76	-0.794486
chr12	31073252	31073704	31073655	31073795	16	-2.86576	1.29756e-06	9.54992e-06	96	31073247	31073301	4	-3.77854	0.00669226	0.0230932	13	ENSG00000245614	-	DDX11-AS1	38.6842	-1.90422
chr12	31323977	31324158	31324100	31324247	428	1.67197	2.29224e-33	9.25834e-32	1341	31323973	31324028	13	1.39123	0.0652012	0.154898	30	ENSG00000139146	-	SINHCAF	1031.36	-0.178115
chr12	31324258	31326149	31326067	31326239	359	-0.76429	2.12105e-13	3.12379e-12	2512	31324233	31324313	22	1.04545	0.00531635	0.0188828	124	ENSG00000139146	-	SINHCAF	1031.36	-0.178115
chr12	31590034	31591135	31590838	31591145	90	-0.82925	7.08419e-06	4.65141e-05	758	31590035	31590084	9	0.944589	0.359831	0.545391	15	ENSG00000170456	-	DENND5B	318.697	-0.850741
chr12	31728995	31729020	31728975	31729068	229	1.17014	1.49335e-13	2.22807e-12	767	31728967	31729063	24	5.64903	1.764e-13	2.61893e-12	153	ENSG00000151743	-	AMN1	213.947	1.55218
chr12	31959448	31959779	31959395	31959490	659	0.720241	4.09999e-10	4.58764e-09	2437	31959713	31959780	14	2.40194	1.0438e-05	6.65248e-05	70	ENSG00000174718	+	RESF1	1362.88	0.615967
chr12	31959603	31960294	31959601	31959654	13	1.00652	0.0316142	0.0863223	75	31960243	31960297	2	0.821969	0.427047	0.611232	14	ENSG00000174718	+	RESF1	1362.88	0.615967
chr12	32106846	32107543	32106645	32107005	346	0.524944	4.52138e-05	0.0002573	1656	32107495	32107544	9	3.57179	0.0030656	0.011681	20	ENSG00000151746	+	BICD1	1171.33	0.748059
chr12	32399557	32399794	32399521	32399611	213	0.766895	3.67242e-08	3.31076e-07	1145	32399746	32399824	7	1.16848	0.0644635	0.153511	40	ENSG00000139132	+	FGD4	665.059	-0.0131027
chr12	32755329	32755896	32755834	32755911	142	-0.584194	0.00670651	0.0231357	394	32755318	32755380	9	-2.28856	0.00103503	0.00444221	61	ENSG00000139131	-	YARS2	781.675	-0.65632
chr12	33439215	33439818	33439526	33439940	967	-0.837162	2.43133e-20	5.51033e-19	5620	33439090	33439269	108	0.71652	0.000327803	0.00156941	462	ENSG00000110975	-	SYT10	671.159	-0.406963
chr12	43836080	43836303	43836052	43836148	98	0.343411	0.107639	0.229168	398	43836255	43836309	4	-0.288668	0.718847	0.840271	26	ENSG00000139173	+	TMEM117	239.857	0.240524
chr12	45729687	45729698	45729682	45729771	383	0.249327	0.0132572	0.0416063	3160	45729662	45729715	16	0.186247	0.785225	0.882299	37	ENSG00000189079	+	ARID2	3101.08	0.102165
chr12	45729936	45730508	45729904	45730013	63	0.220172	0.43977	0.622355	199	45730462	45730512	18	3.32462	9.31837e-07	6.999e-06	60	ENSG00000189079	+	ARID2	3101.08	0.102165
chr12	45989872	45990563	45990496	45990734	1378	0.190929	0.020329	0.0596555	18185	45989818	45989964	15	1.51899	7.76321e-05	0.000423073	114	ENSG00000139218	-	SCAF11	7271.95	0.207895
chr12	45991090	45992039	45991925	45992169	204	-0.117469	0.366432	0.552539	1387	45991086	45991141	15	1.90816	0.00305399	0.0116415	45	ENSG00000139218	-	SCAF11	7271.95	0.207895
chr12	46267471	46267930	46267885	46267934	8	0.0888888	0.926002	0.962446	18	46267472	46267556	9	0.698269	0.343654	0.529466	29	ENSG00000111371	-	SLC38A1	31358.1	-0.277497
chr12	46268832	46269011	46268549	46269125	2448	-0.264766	0.000216399	0.0010747	35256	46268827	46268885	17	1.40312	0.01047	0.0339327	57	ENSG00000111371	-	SLC38A1	31358.1	-0.277497
chr12	46269048	46270063	46269997	46270068	8	-2.59482	0.000545139	0.00249652	54	46269042	46269109	227	0.783103	2.86725e-08	2.61812e-07	1106	ENSG00000111371	-	SLC38A1	31358.1	-0.277497
chr12	46371481	46372770	46372720	46372786	33437	1.10645	1.06566e-53	7.94415e-52	68063	46371477	46371615	13	1.9135	6.04609e-06	4.01408e-05	104	ENSG00000134294	-	SLC38A2	21291.1	1.14852
chr12	46383451	46383966	46383430	46383522	183	3.41007	1.46512e-47	9.35467e-46	558	46383899	46383987	46	1.29017	3.23093e-06	2.24005e-05	230	ENSG00000257261	+	ENSG00000257261	316.805	1.59379
chr12	46384022	46384239	46383993	46384075	51	1.02104	0.000280899	0.00136346	226	46384192	46384244	8	2.10975	0.00105794	0.00453083	51	ENSG00000257261	+	ENSG00000257261	316.805	1.59379
chr12	47079621	47079935	47079872	47079963	1808	-0.123046	0.196898	0.35907	6941	47079588	47079696	412	2.03569	5.81652e-61	5.1813e-59	2064	ENSG00000139211	-	AMIGO2	5855.49	0.363505
chr12	47758984	47759107	47758964	47759053	18	-1.27652	0.000153906	0.000788423	186	47759027	47759114	16	-0.110418	0.782025	0.880358	105	ENSG00000211584	+	SLC48A1	1758.6	0.860089
chr12	47819430	47819902	47819831	47819986	233	-0.219586	0.0685796	0.161192	1815	47819408	47819459	6	0.419527	0.560431	0.725774	34	ENSG00000061273	-	HDAC7	2111.89	0.0263357
chr12	47820054	47820709	47820646	47820724	12	0.0779018	0.85482	0.923773	93	47820037	47820122	66	-0.273727	0.426117	0.610311	162	ENSG00000061273	-	HDAC7	2111.89	0.0263357
chr12	48105922	48106024	48105944	48106134	214	-1.37981	1.47632e-23	3.93696e-22	1450	48105908	48105991	12	-0.232353	0.643362	0.78821	64	ENSG00000079387	-	SENP1	1056.96	-1.14359
chr12	48106115	48106278	48106114	48106186	8	-0.105437	0.828534	0.907866	68	48106243	48106317	71	0.77928	0.00357022	0.0133462	253	ENSG00000152556	+	PFKM	1274.7	-1.28231
chr12	48157105	48157514	48157453	48157596	176	0.212408	0.124552	0.255872	1059	48157106	48157153	7	1.56646	0.183544	0.3409	13	ENSG00000177981	-	ASB8	1335.31	-0.113303
chr12	48814832	48815425	48814796	48814904	72	0.0563182	0.76923	0.872309	501	48815325	48815490	28	0.219448	0.412705	0.598728	258	ENSG00000167535	+	CACNB3	1611.58	-0.346167
chr12	48818143	48818429	48818135	48818189	3	-0.109498	0.899416	0.947741	22	48818361	48818449	9	0.77181	0.0836725	0.188587	85	ENSG00000167535	+	CACNB3	1611.58	-0.346167
chr12	48818524	48818609	48818493	48818582	76	0.268501	0.220195	0.388773	386	48818522	48818634	6	0.571415	0.257104	0.434396	72	ENSG00000167535	+	CACNB3	1611.58	-0.346167
chr12	48851692	48852141	48852090	48852170	2139	-0.512459	1.36083e-07	1.14501e-06	9530	48851673	48851745	9	-2.84909	0.000338496	0.00161466	53	ENSG00000174243	-	DDX23	8597.52	-0.585443
chr12	48938922	48940055	48939992	48940062	27	0.0736984	0.870811	0.932542	94	48938900	48938975	12	-0.437642	0.462353	0.64279	47	ENSG00000272822	-	ENSG00000272822	3.53764	1.83336
chr12	48956715	48957486	48957381	48957494	4692	-0.338986	6.04802e-05	0.000336631	43330	48956698	48956767	7	0.104734	0.814447	0.899484	85	ENSG00000134287	-	ARF3	10149.4	-0.244548
chr12	49060334	49060793	49060654	49060818	98	0.460413	0.00538888	0.0191077	651	49060311	49060380	5	-1.51838	0.0277419	0.0774291	43	ENSG00000167548	-	KMT2D	5426.77	0.353471
chr12	49130888	49131394	49131344	49131400	77986	-2.89321	6.75551e-273	1.84221e-269	110069	49130882	49130983	21	-0.225878	0.483413	0.661988	185	ENSG00000123416	-	TUBA1B	25930.1	-3.0709
chr12	49188599	49189079	49189029	49189086	4333	0.244451	0.061496	0.147974	5719	49188600	49188665	10	-0.576167	0.444481	0.626421	30	ENSG00000167552	-	TUBA1A	3672.31	-0.0984891
chr12	49265081	49265567	49265075	49265132	23168	-1.67475	6.28197e-113	1.59956e-110	37849	49265517	49265575	11	1.56056	0.0105763	0.0342206	45	ENSG00000167553	+	TUBA1C	11884.6	-1.68485
chr12	49366904	49367240	49366897	49366955	41	-1.00076	0.0107513	0.0347122	134	49367180	49367273	20	-0.142321	0.625362	0.774836	207	ENSG00000123352	+	SPATS2	1611.22	-0.514272
chr12	49367377	49367397	49367279	49367548	894	-0.57703	5.82393e-10	6.42396e-09	5840	49367351	49367415	35	0.664136	0.0764344	0.175717	116	ENSG00000123352	+	SPATS2	1611.22	-0.514272
chr12	50085341	50085551	50085200	50085409	1604	-0.731721	2.12293e-16	3.83306e-15	10074	50085438	50085582	13	0.536366	0.100469	0.217285	153	ENSG00000066117	+	SMARCD1	2572.57	-0.379448
chr12	50763521	50763938	50763516	50763568	9	0.276934	0.72068	0.841235	29	50763868	50763947	96	0.00072128	0.996981	0.998374	589	ENSG00000123268	+	ATF1	1002.92	-0.358974
chr12	51026544	51028240	51028193	51028247	24	-0.959947	0.0580568	0.141458	71	51026506	51026565	5	-1.07309	0.0546566	0.134859	61	ENSG00000110911	-	SLC11A2	1125.47	-1.06741
chr12	51238825	51239147	51238811	51238905	9791	1.02065	1.15882e-36	5.27526e-35	31736	51239077	51239165	7	0.847723	0.0533083	0.132228	91	ENSG00000183283	+	DAZAP2	16111.5	1.0217
chr12	51269779	51269968	51269772	51270000	42	-1.8035	1.06626e-15	1.84255e-14	492	51269756	51269828	26	-0.328911	0.374767	0.561011	123	ENSG00000170545	-	SMAGP	534.532	-0.566262
chr12	51270052	51270209	51270133	51270234	533	-0.500774	5.89878e-06	3.92367e-05	2720	51270043	51270126	16	-1.09335	0.019562	0.0577814	93	ENSG00000170545	-	SMAGP	534.532	-0.566262
chr12	51270335	51270426	51270365	51270436	113	-1.55976	5.67504e-16	9.96355e-15	644	51270300	51270359	14	-0.131584	0.709639	0.83396	140	ENSG00000170545	-	SMAGP	534.532	-0.566262
chr12	51391428	51391645	51391595	51391682	53	-0.615756	0.00255233	0.00993572	471	51391425	51391510	13	0.38929	0.327167	0.513	113	ENSG00000139629	-	GALNT6	1407.02	-0.395477
chr12	51391735	51391820	51391732	51391786	23	1.20435	0.00925375	0.0305445	86	51391770	51391829	6	0.780798	0.232099	0.403403	43	ENSG00000050438	+	SLC4A8	472.248	0.451201
chr12	52191536	52192013	52191943	52192019	25020	0.177273	0.0209921	0.0612666	35184	52191532	52191588	8	-0.0507845	0.940837	0.970052	36	ENSG00000167767	-	KRT80	26428.3	0.0339077
chr12	52213499	52213561	52213515	52213600	9	-0.522769	0.311791	0.496488	64	52213496	52213546	8	0.813735	0.238202	0.410649	35	ENSG00000257137	-	LINC02874	10.8207	0.0249284
chr12	52245457	52247468	52247358	52247490	88	1.6938	1.81023e-10	2.09085e-09	265	52245336	52245604	23	1.07049	3.97428e-05	0.000228349	266	ENSG00000257671	-	KRT7-AS	60.9154	1.82188
chr12	52278759	52280403	52280358	52280408	9	2.97279	0.000113621	0.00059916	41	52278746	52278832	23	0.328406	0.336313	0.522276	136	ENSG00000257830	-	ENSG00000257830	22.6504	3.20463
chr12	52305237	52307355	52307310	52307356	10	1.30356	0.218531	0.386909	14	52305235	52305290	22	0.565696	0.191188	0.351254	96	ENSG00000287051	-	ENSG00000287051	148.167	0.300535
chr12	52308348	52308623	52308497	52308655	34	0.59568	0.00308098	0.0117311	529	52308349	52308397	13	0.588448	0.439677	0.622309	28	ENSG00000257829	-	ENSG00000257829	71.2659	0.641847
chr12	52901171	52901861	52901793	52901868	11	-0.777546	0.137216	0.275124	68	52901169	52901221	282	-0.127159	0.59302	0.750293	500	ENSG00000170421	-	KRT8	328407	0.147716
chr12	52901956	52902002	52901964	52902302	419	-0.0630948	0.610827	0.763655	2300	52901951	52902029	16	0.242184	0.608574	0.761786	98	ENSG00000170421	-	KRT8	328407	0.147716
chr12	52904841	52905058	52905007	52905067	26654	0.295747	0.000268071	0.00130615	76179	52904753	52904894	36	0.136981	0.684636	0.817413	146	ENSG00000170421	-	KRT8	328407	0.147716
chr12	52906626	52907298	52907229	52907305	25	1.47726	7.11451e-05	0.000390845	124	52906625	52906674	11	-0.542872	0.562791	0.727544	20	ENSG00000170421	-	KRT8	328407	0.147716
chr12	52946518	52948932	52946515	52946570	8	-0.711032	0.439281	0.622059	22	52948878	52948938	30	1.72719	0.00282611	0.0108678	59	ENSG00000111057	+	KRT18	190459	-0.320704
chr12	52949117	52949860	52949110	52949172	114716	-0.102464	0.188669	0.347672	386622	52949783	52949887	588	2.41659	1.60541e-154	7.71109e-152	5893	ENSG00000111057	+	KRT18	190459	-0.320704
chr12	53006455	53006893	53006425	53006514	2042	0.019062	0.839867	0.915112	3490	53006842	53006921	11	-3.08403	2.26334e-05	0.000135813	72	ENSG00000063046	+	EIF4B	14083.5	0.111876
chr12	53053790	53054214	53053791	53053866	11	-2.3795	0.000309295	0.00148831	64	53054166	53054219	3	-1.27606	0.228451	0.399068	17	ENSG00000111077	+	TNS2	172.433	-1.28532
chr12	53054246	53054407	53054333	53054432	214	-0.361892	0.00572086	0.0201424	1372	53054243	53054300	3	0.00450242	0.996188	0.99802	19	ENSG00000257337	-	ENSG00000257337	555.84	-0.660978
chr12	53066353	53068259	53068213	53068282	16	0.0136291	0.981069	0.990075	49	53066340	53066401	2	-0.038016	0.967148	0.983399	19	ENSG00000167778	-	SPRYD3	3775.79	-0.0869986
chr12	53180721	53181056	53180597	53180799	568	0.775191	1.5877e-21	3.81735e-20	5841	53181007	53181063	23	3.41873	5.11439e-08	4.52581e-07	72	ENSG00000139651	+	ZNF740	2756.67	0.703481
chr12	53230923	53232187	53232135	53232218	1803	0.59098	9.57351e-14	1.44959e-12	6762	53230922	53230975	4	0.231586	0.7963	0.888676	23	ENSG00000172819	-	RARG	4899.38	0.356255
chr12	53232475	53232586	53232512	53232590	17	0.74281	0.0878019	0.195821	93	53232448	53232538	13	1.02	0.0367493	0.0976089	79	ENSG00000172819	-	RARG	4899.38	0.356255
chr12	53232712	53232922	53232892	53232946	2	-0.588566	0.494271	0.671699	26	53232713	53232763	14	0.729431	0.468245	0.647928	16	ENSG00000172819	-	RARG	4899.38	0.356255
chr12	53251212	53251376	53251211	53251264	6	-1.50117	0.0390048	0.102546	42	53251335	53251377	13	-3.80843	0.263482	0.441506	15	ENSG00000182544	+	MFSD5	1689.95	-0.121154
chr12	53251712	53252017	53251609	53251735	3	-0.809941	0.162035	0.311731	53	53251963	53252045	11	0.297304	0.476148	0.655361	94	ENSG00000182544	+	MFSD5	1689.95	-0.121154
chr12	53252180	53252589	53252068	53252256	1826	-0.164967	0.0424618	0.109863	10846	53252540	53252594	15	-0.752121	0.261207	0.439056	42	ENSG00000182544	+	MFSD5	1689.95	-0.121154
chr12	53299694	53300359	53299685	53299870	418	-0.325761	0.000421032	0.00197286	4199	53300308	53300376	67	0.219828	0.549231	0.717716	169	ENSG00000139637	+	MYG1	30.7906	-0.99482
chr12	53321436	53321593	53321532	53321629	268	-0.954922	1.61673e-15	2.76384e-14	2201	53321341	53321484	22	0.580735	0.150911	0.29544	108	ENSG00000094914	-	AAAS	1785.46	-0.876568
chr12	53380175	53380465	53380105	53380303	257	0.310558	0.0172534	0.0519977	1236	53380417	53380466	7	0.18182	0.770641	0.873309	41	ENSG00000185591	+	SP1	6305.53	0.510623
chr12	53380388	53380701	53380380	53380426	6	-1.33089	0.219207	0.387618	17	53380652	53380706	6	2.22578	0.0378905	0.100082	19	ENSG00000185591	+	SP1	6305.53	0.510623
chr12	53500922	53501214	53500899	53500987	17	0.795913	0.0222649	0.0643989	157	53501139	53501231	27	0.329634	0.465615	0.645506	87	ENSG00000139546	+	TARBP2	1906.09	-0.578899
chr12	53501282	53501538	53501144	53501344	529	-0.794636	2.43134e-18	4.95028e-17	4842	53501469	53501566	137	0.464935	0.016857	0.0509794	502	ENSG00000139546	+	TARBP2	1906.09	-0.578899
chr12	53675838	53676100	53676043	53676125	1251	-0.129812	0.145298	0.287231	8381	53675835	53675892	7	1.89009	0.0335944	0.0906979	26	ENSG00000135390	-	ATP5MC2	3877.83	-0.102822
chr12	53938874	53939852	53938717	53939034	706	1.18689	6.25003e-38	2.94675e-36	6736	53939714	53939952	120	1.62758	6.68867e-19	1.40236e-17	699	ENSG00000123364	+	HOXC13	1889.34	1.26955
chr12	53974855	53975237	53975192	53975300	7	-0.142748	0.819463	0.902535	44	53974713	53975033	14	-1.91199	8.13384e-14	1.2367e-12	399	ENSG00000228630	-	HOTAIR	119.579	-1.10823
chr12	53999694	54000008	53999964	54000012	9	-1.57391	0.0142839	0.0443184	54	53999694	53999744	10	-0.238032	0.69514	0.824422	44	ENSG00000250451	-	HOXC-AS1	4.21589	-2.36682
chr12	54000160	54000582	54000072	54000349	40	-1.8948	3.3224e-11	4.10258e-10	328	54000529	54000585	4	-0.0374131	0.95716	0.978244	33	ENSG00000180806	+	HOXC9	96.1256	-1.93187
chr12	54016887	54018323	54016845	54016937	43	-3.59422	9.3319e-15	1.51621e-13	223	54018273	54018326	4	-3.85554	0.00501013	0.0179366	14	ENSG00000198353	+	HOXC4	14.7807	-2.61576
chr12	54283827	54283881	54283812	54283969	91	-0.904975	0.00113144	0.00481366	268	54283830	54283882	10	-0.39089	0.655572	0.796828	22	ENSG00000135486	+	HNRNPA1	5223.41	-0.668801
chr12	55726739	55729008	55728947	55729028	106175	-0.0483344	0.562968	0.727668	150148	55726732	55726789	3	-0.576666	0.675649	0.810947	9	ENSG00000135404	-	CD63	17584.8	-0.187899
chr12	55829118	55829586	55829488	55829641	1509	0.113561	0.146478	0.288963	9894	55829109	55829165	3	-1.05981	0.30086	0.483845	19	ENSG00000135392	-	DNAJC14	1667.4	-0.0147645
chr12	55829792	55830774	55829755	55829842	217	0.677765	0.000137392	0.00071181	637	55830724	55830785	3	-0.832028	0.332073	0.517898	27	ENSG00000182796	+	TMEM198B	1356.37	1.03061
chr12	55927021	55927111	55927069	55927148	310	-0.322591	0.0166073	0.0503197	1359	55927010	55927067	13	3.31314	1.18406e-09	1.26495e-08	93	ENSG00000170473	-	PYM1	1828.59	-0.289175
chr12	55927210	55927893	55927724	55927902	2079	-0.382209	1.77579e-05	0.000108836	11659	55927191	55927365	55	0.639306	0.00135884	0.00566843	492	ENSG00000170473	-	PYM1	1828.59	-0.289175
chr12	55932067	55933296	55932043	55932147	450	2.47722	1.80772e-81	2.52591e-79	1578	55933245	55933300	12	3.29194	3.74771e-05	0.000216183	42	ENSG00000065357	+	DGKA	2577.3	2.47253
chr12	55972451	55973557	55973510	55973564	12	0.0262077	0.959026	0.979216	69	55972451	55972498	14	-2.64175	0.0111319	0.0357513	28	ENSG00000185664	-	PMEL	117.752	0.397654
chr12	55997285	55999708	55997255	55997346	310	-0.388304	0.00808511	0.0271795	1018	55999659	55999709	56	1.37555	0.000855909	0.00374238	98	ENSG00000139531	+	SUOX	935.476	-0.216047
chr12	56007515	56007739	56007390	56007561	46	-0.769732	0.000317491	0.0015241	416	56007678	56007741	17	0.133834	0.823877	0.905168	55	ENSG00000123411	+	IKZF4	296.228	-0.413388
chr12	56128266	56129263	56128238	56128338	4349	-0.382209	1.63122e-05	0.000100625	16021	56129218	56129299	25	1.28632	0.00596738	0.0208985	74	ENSG00000139641	+	ESYT1	8385.82	-0.537025
chr12	56151842	56152468	56151809	56151891	16	-1.3332	0.00318623	0.0120829	116	56152397	56152494	29	-0.548796	0.0633686	0.151467	212	ENSG00000196465	+	MYL6B	305.4	-1.43183
chr12	56157351	56158224	56157324	56157508	153	-1.23404	1.20222e-16	2.21224e-15	1440	56158176	56158228	15	0.214845	0.762042	0.86766	32	ENSG00000196465	+	MYL6B	305.4	-1.43183
chr12	56158358	56160058	56158353	56158411	171658	0.268464	0.00184545	0.00744627	215026	56160021	56160075	6	0.0583978	0.932346	0.965158	39	ENSG00000092841	+	MYL6	27555.6	0.150873
chr12	56161553	56162869	56161533	56161581	3	0.264005	0.769401	0.872427	21	56162821	56162871	11	0.00287732	0.997296	0.998528	23	ENSG00000092841	+	MYL6	27555.6	0.150873
chr12	56188894	56189482	56189420	56189615	666	-0.515245	3.19698e-07	2.56559e-06	6313	56188886	56188941	4	0.537804	0.548148	0.7169	19	ENSG00000139613	-	SMARCC2	4924.03	-0.644242
chr12	56189725	56190261	56190126	56190300	68	-0.734439	6.08337e-05	0.000338443	721	56189723	56189775	5	-2.65005	0.0333516	0.0901862	19	ENSG00000258199	-	ENSG00000258199	11.9264	-0.557556
chr12	56257628	56258383	56258314	56258400	465	-0.568587	1.11912e-08	1.07336e-07	3785	56257604	56257681	10	-1.40743	0.0138598	0.0431975	63	ENSG00000139645	-	ANKRD52	8972.42	-0.67037
chr12	56266941	56267203	56266854	56266994	427	0.457855	0.00778411	0.0263026	692	56267144	56267210	17	0.190681	0.739274	0.853063	52	ENSG00000135469	+	COQ10A	196.086	0.214316
chr12	56300135	56300315	56300253	56300345	982	-0.632357	7.8786e-16	1.37268e-14	14912	56300044	56300192	82	-1.31178	3.02785e-12	4.09326e-11	623	ENSG00000062485	-	CS	6038	-0.563417
chr12	56316104	56316345	56316294	56316365	11	0.39611	0.529235	0.70109	43	56316104	56316156	6	1.76456	0.0740385	0.171365	18	ENSG00000257727	-	CNPY2	527.4	-0.100304
chr12	56635115	56636342	56636295	56636380	362	-0.52039	2.46542e-05	0.000146907	1478	56635111	56635164	14	0.0224265	0.975361	0.986824	34	ENSG00000076108	-	BAZ2A	6327.66	0.0688528
chr12	56636449	56638317	56638271	56638320	32	-2.39315	0.00318476	0.0120795	47	56636448	56636494	9	-0.285804	0.753636	0.862499	21	ENSG00000076108	-	BAZ2A	6327.66	0.0688528
chr12	56688058	56688223	56688049	56688366	9093	-0.747108	1.17949e-27	3.77543e-26	54249	56688052	56688113	6	0.746482	0.197734	0.360165	54	ENSG00000110958	-	PTGES3	7908.18	-0.535723
chr12	56725445	56725530	56725453	56725547	390	1.35743	2.94772e-16	5.27383e-15	941	56725397	56725445	3	0.516938	0.638328	0.784623	14	ENSG00000196531	-	NACA	9919.24	0.00809122
chr12	56752127	56752356	56752285	56752379	485	-3.21304	2.80161e-102	5.7207e-100	2813	56752104	56752225	9	-2.70465	0.000222831	0.00110327	58	ENSG00000198056	-	PRIM1	776.586	-3.40439
chr12	57087360	57088648	57088572	57088648	13	-0.0957058	0.847279	0.919664	74	57087354	57087451	9	-2.08007	0.000189964	0.000954403	80	ENSG00000166881	-	NEMP1	1796.73	-1.3138
chr12	57091680	57093989	57091680	57091732	6	-0.195774	0.842662	0.916822	18	57093973	57094031	8	5.59726	5.67883e-07	4.40346e-06	46	ENSG00000166886	+	NAB2	2132.05	-0.250706
chr12	57216818	57216883	57216790	57216866	33	-1.63147	5.9795e-05	0.000333037	138	57216860	57216884	11	2.81021	0.00371915	0.0138326	25	ENSG00000182379	+	NXPH4	92.2413	-1.97275
chr12	57430552	57430787	57430733	57430817	190	0.388009	0.00206445	0.00822861	1436	57430550	57430602	12	-0.711476	0.282737	0.463053	41	ENSG00000179912	-	R3HDM2	1325.15	0.573804
chr12	57430714	57430972	57430923	57431183	413	0.568511	1.80718e-06	1.30107e-05	2464	57430707	57430769	4	-0.405428	0.684275	0.817152	22	ENSG00000179912	-	R3HDM2	1325.15	0.573804
chr12	57520701	57522799	57520702	57520760	11	1.25625	0.0584771	0.142294	36	57522751	57522807	6	1.08065	0.284536	0.465154	18	ENSG00000166987	+	MBD6	3798.55	0.852568
chr12	57546498	57547176	57547111	57547200	3219	0.0310323	0.723508	0.84319	15266	57546499	57546546	9	3.66706	0.00627342	0.0218216	13	ENSG00000175203	-	DCTN2	5419.87	0.0188595
chr12	57604823	57605257	57604805	57604882	33	-1.09854	0.00772824	0.0261439	121	57605209	57605261	9	-1.20632	0.215221	0.382856	24	ENSG00000178498	+	DTX3	725.472	-1.46022
chr12	57726301	57726616	57726223	57726355	169	-2.20048	1.17887e-34	5.01797e-33	944	57726542	57726629	12	-1.53922	0.000296144	0.00143105	131	ENSG00000255737	+	AGAP2-AS1	546.875	-2.22141
chr12	57755106	57755864	57754912	57755165	115	-1.04262	1.29426e-14	2.08085e-13	1501	57755816	57755944	8	2.26717	5.8502e-06	3.89381e-05	78	ENSG00000139266	+	MARCHF9	1546.32	-0.945669
chr12	57764860	57767077	57767031	57767081	6	-2.9005	0.0362738	0.0965809	13	57764839	57764934	23	-0.930067	0.0136268	0.0425924	140	ENSG00000111012	-	CYP27B1	146.151	-0.709494
chr12	57771899	57772104	57772042	57772120	2741	-1.01786	6.07111e-22	1.48762e-20	8079	57771857	57771950	5	-0.541224	0.417689	0.603379	38	ENSG00000037897	-	METTL1	688.854	-1.09865
chr12	57772229	57772581	57772193	57772280	14	-0.844159	0.0240251	0.0687142	144	57772532	57772583	12	-0.108519	0.880306	0.937792	32	ENSG00000123427	+	EEF1AKMT3	175.788	-0.922021
chr12	57844935	57845553	57845505	57845625	11	-0.162246	0.761805	0.867565	60	57844931	57844990	3	0.116417	0.907545	0.952321	16	ENSG00000175215	-	CTDSP2	5244.45	0.0512722
chr12	57845719	57846703	57846642	57846731	2308	-0.0296696	0.700844	0.828303	12416	57845693	57845795	27	2.28053	4.0608e-07	3.21427e-06	105	ENSG00000175215	-	CTDSP2	5244.45	0.0512722
chr12	59596044	59597045	59595929	59596218	93	-1.9314	1.27326e-26	3.90696e-25	876	59596999	59597048	21	-1.1667	0.0585463	0.142409	51	ENSG00000118596	+	SLC16A7	1471.57	-2.03036
chr12	62466825	62467290	62466787	62466874	1127	1.02997	9.76048e-31	3.57346e-29	7888	62467237	62467307	41	3.31214	5.79661e-13	8.29001e-12	136	ENSG00000061987	+	MON2	5054.3	1.03627
chr12	62933520	62935149	62935086	62935162	513	-0.753813	3.31917e-08	3.00997e-07	1517	62933517	62933572	5	-0.457658	0.601156	0.756214	23	ENSG00000111110	-	PPM1H	2184.35	-0.111064
chr12	63844700	63844884	63844671	63844852	64	1.13739	7.4658e-09	7.31574e-08	481	63844838	63844888	4	0.820593	0.410248	0.596504	19	ENSG00000196935	+	SRGAP1	2248.7	1.76686
chr12	64221877	64222295	64222196	64222300	449	-0.383467	0.000135435	0.000702529	2811	64221863	64221935	31	0.293997	0.386822	0.573359	153	ENSG00000174206	-	C12orf66	852.339	-0.392755
chr12	64404460	64405041	64404316	64404627	1787	-0.540909	9.53725e-11	1.13141e-09	28015	64404988	64405054	8	-0.290716	0.644059	0.788721	42	ENSG00000184575	+	XPOT	4691.72	-0.588731
chr12	64452137	64452896	64452108	64452190	2796	0.328133	0.000278263	0.00135183	13101	64452850	64452925	13	1.41995	0.00433777	0.0158189	69	ENSG00000183735	+	TBK1	3217.91	0.330148
chr12	64780600	64781049	64780493	64780655	539	0.727572	4.89357e-12	6.49424e-11	2739	64781004	64781071	11	-0.0928735	0.89405	0.944872	34	ENSG00000111490	+	TBC1D30	951.072	-0.386049
chr12	64780753	64781474	64780735	64780831	529	-0.966073	6.73946e-20	1.49104e-18	5313	64781425	64781476	8	-1.32304	0.130471	0.264706	26	ENSG00000111490	+	TBC1D30	951.072	-0.386049
chr12	64824666	64825040	64824550	64824719	138	-0.0470105	0.803911	0.893319	543	64824988	64825044	9	-0.333052	0.513266	0.688165	64	ENSG00000111490	+	TBC1D30	951.072	-0.386049
chr12	65169582	65170552	65169555	65169632	690	0.0273317	0.823199	0.904706	2303	65170506	65170556	5	2.49251	0.0335907	0.0906908	15	ENSG00000174106	+	LEMD3	1897.71	0.0877898
chr12	66169357	66169771	66169721	66169775	4	1.71219	0.0228185	0.0657592	31	66169339	66169404	13	-0.00997028	0.987947	0.993697	38	ENSG00000155957	-	TMBIM4	272.242	-0.385807
chr12	66169733	66169991	66169915	66170019	2180	-0.249066	0.00169092	0.00689086	15433	66169728	66169787	9	-0.64087	0.454706	0.635693	24	ENSG00000155957	-	TMBIM4	272.242	-0.385807
chr12	68705554	68706360	68705555	68705579	13	1.09271	0.320655	0.506358	13	68706315	68706368	7	0.571111	0.527392	0.699526	22	ENSG00000233560	+	KRT8P39	20.7939	-0.887759
chr12	68808178	68808848	68808077	68808253	2413	0.440184	2.19783e-08	2.03411e-07	18360	68808774	68808972	1026	5.47726	1.2458e-285	4.57891e-282	4873	ENSG00000135679	+	MDM2	111759	5.17709
chr12	68843093	68843304	68843263	68843320	4	4.23118	0.000983335	0.00424053	19	68843085	68843143	400	4.98213	9.14613e-36	4.04805e-34	429	ENSG00000257181	-	ENSG00000257181	428.634	5.26358
chr12	69359744	69359985	69359722	69359828	623	-1.14962	1.23956e-36	5.6398e-35	4991	69359923	69359998	45	-2.1494	1.56574e-07	1.30792e-06	152	ENSG00000127337	+	YEATS4	578.928	-1.0579
chr12	69585458	69585807	69585430	69585519	6095	-0.511833	7.01717e-13	9.96143e-12	14309	69585761	69585813	15	0.281861	0.636944	0.783686	44	ENSG00000166226	+	CCT2	13333.9	-0.679263
chr12	69738896	69739711	69738867	69738949	934	-0.719124	3.17543e-13	4.62346e-12	3653	69739666	69739714	6	0.244754	0.790936	0.885553	19	ENSG00000127328	+	RAB3IP	1237.79	-0.894377
chr12	70243029	70243359	70243287	70243365	31	0.564072	0.0420876	0.109085	222	70243014	70243079	17	0.389927	0.312397	0.497237	110	ENSG00000257815	-	PRANCR	48.5133	0.446881
chr12	70243432	70243658	70243428	70243483	2171	0.0128832	0.900712	0.948485	5007	70243605	70243682	35	0.746993	0.0316477	0.0864083	146	ENSG00000111596	+	CNOT2	2587.57	-0.0356489
chr12	70243747	70244157	70243741	70243802	20	-0.937372	0.0597304	0.144611	81	70244106	70244160	6	5.17806	5.1839e-05	0.000291645	19	ENSG00000111596	+	CNOT2	2587.57	-0.0356489
chr12	71662999	71663835	71663753	71663853	888	0.672345	1.56914e-10	1.82486e-09	3124	71663000	71663081	15	2.19231	5.66432e-06	3.77842e-05	85	ENSG00000133858	-	ZFC3H1	3336.92	0.744503
chr12	71686092	71686306	71686069	71686253	358	-0.99273	6.17758e-11	7.45507e-10	990	71686257	71686311	4	1.54585	0.0413846	0.107633	29	ENSG00000139291	+	TMEM19	654.439	-1.61431
chr12	71754872	71755225	71754842	71754949	6748	0.0582384	0.494445	0.671827	44323	71755178	71755231	22	-0.822205	0.182568	0.339637	51	ENSG00000080371	+	RAB21	5950.88	0.039481
chr12	74537834	74538661	74537810	74537992	3877	-0.606649	5.37741e-12	7.11512e-11	27706	74538612	74538668	11	-2.75813	0.025891	0.0730938	20	ENSG00000253719	+	ATXN7L3B	8079.38	-0.621311
chr12	76030114	76030759	76030114	76030164	10	0.681437	0.376834	0.563047	28	76030688	76030786	166	0.250426	0.172217	0.32595	594	ENSG00000257453	+	ENSG00000257453	16.4375	1.46655
chr12	76057802	76059875	76059805	76059878	181	-0.211794	0.407608	0.594106	279	76057801	76057862	19	-0.628546	0.301079	0.484108	51	ENSG00000187109	-	NAP1L1	7365.95	-0.208959
chr12	76084075	76084684	76084559	76084702	26207	-0.0412566	0.616	0.767615	40418	76084073	76084125	22	-1.10686	0.0626631	0.150163	54	ENSG00000187109	-	NAP1L1	7365.95	-0.208959
chr12	76764257	76764492	76764234	76764309	93	-0.902407	0.00221641	0.00875748	215	76764444	76764494	6	1.28096	0.202115	0.36587	17	ENSG00000186908	+	ZDHHC17	736.19	-0.757809
chr12	79045246	79045645	79045594	79045661	206	0.287175	0.198068	0.360572	395	79045155	79045409	87	0.667732	9.55915e-05	0.000511742	744	ENSG00000257191	-	ENSG00000257191	43.0364	0.06038
chr12	79690028	79690404	79690350	79690412	109	0.762751	9.57645e-05	0.000512474	475	79690022	79690081	11	1.36331	0.0834255	0.188151	29	ENSG00000177425	-	PAWR	6917.68	0.273463
chr12	79690674	79690963	79690911	79691115	3235	0.524278	3.48449e-08	3.14941e-07	9495	79690666	79690724	118	1.86792	9.36179e-21	2.1635e-19	581	ENSG00000177425	-	PAWR	6917.68	0.273463
chr12	80936626	80937706	80937643	80937726	375	-1.07925	2.12406e-12	2.90785e-11	980	80936605	80936673	8	0.516568	0.417535	0.603275	39	ENSG00000111052	-	LIN7A	545.664	-1.37651
chr12	82358528	82358774	82358699	82358800	226	-1.25741	3.27843e-16	5.83956e-15	1050	82358507	82358588	88	-0.908324	0.000121207	0.000635667	393	ENSG00000133773	-	CCDC59	1342.13	-0.411723
chr12	82686494	82686716	82686666	82686746	14	1.42715	0.0094583	0.0311152	57	82686459	82686567	27	1.41701	8.9297e-08	7.6739e-07	263	ENSG00000286043	-	ENSG00000286043	6.75313	4.87002
chr12	88141901	88142087	88142027	88142105	442	-1.6339	3.05608e-31	1.14924e-29	1352	88141898	88141953	5	0.4209	0.576756	0.738021	28	ENSG00000198707	-	CEP290	689.163	-1.24466
chr12	89353731	89353961	89353710	89353804	55	0.867993	0.00047763	0.00221413	282	89353879	89354005	37	0.0924862	0.730391	0.847366	244	ENSG00000286608	+	ENSG00000286608	4.01164	2.6414
chr12	89524565	89524758	89524705	89524796	490	0.111226	0.350122	0.535815	2534	89524560	89524619	9	0.434483	0.48237	0.661237	44	ENSG00000257594	-	GALNT4	231.107	-0.0346306
chr12	89524868	89525302	89525253	89525304	19	0.518944	0.457198	0.637973	33	89524864	89524947	486	0.543747	0.000221169	0.00109601	908	ENSG00000139323	-	POC1B	1010.98	-0.560612
chr12	89525274	89525429	89525377	89525547	177	-1.11532	1.61807e-12	2.23359e-11	890	89525275	89525324	6	0.842901	0.340195	0.526039	21	ENSG00000139323	-	POC1B	1010.98	-0.560612
chr12	89525611	89525999	89525949	89526034	325	-0.0823268	0.538553	0.708991	1356	89525486	89525747	178	-1.03	3.28937e-15	5.51071e-14	1598	ENSG00000139323	-	POC1B	1010.98	-0.560612
chr12	89708964	89709001	89708955	89709044	54	2.80594	3.69554e-32	1.43371e-30	439	89708986	89709036	18	-0.369584	0.408336	0.594728	84	ENSG00000271614	+	ATP2B1-AS1	297.396	1.77025
chr12	89709105	89709336	89709266	89709536	542	0.0788899	0.436694	0.619901	4159	89709096	89709156	6	1.17727	0.061144	0.147307	41	ENSG00000070961	-	ATP2B1	5139.92	0.336198
chr12	92144915	92145844	92145795	92145856	4019	1.52018	1.44417e-73	1.76422e-71	20203	92144915	92144963	12	3.96804	4.47672e-05	0.000255033	39	ENSG00000133639	-	BTG1	4063.87	1.47095
chr12	93441470	93441938	93441868	93441966	2486	-0.0949769	0.269083	0.448	18506	93441464	93441500	9	-0.571545	0.627178	0.776053	12	ENSG00000177889	-	UBE2N	3238.57	-0.0658245
chr12	93570388	93570828	93570335	93570440	225	1.13188	4.64204e-07	3.64364e-06	429	93570782	93570964	65	1.15446	1.09756e-07	9.33623e-07	379	ENSG00000120833	+	SOCS2	1052.46	0.0825101
chr12	93571011	93571226	93570926	93571099	182	0.204069	0.0997884	0.216189	1476	93571188	93571238	8	-0.211703	0.779364	0.878851	28	ENSG00000120833	+	SOCS2	1052.46	0.0825101
chr12	93571288	93571419	93571370	93571436	203	-0.43979	0.0506951	0.126957	377	93571253	93571344	38	-0.169202	0.533167	0.70441	233	ENSG00000246985	-	SOCS2-AS1	145.88	0.202607
chr12	93571711	93571767	93571696	93571780	128	-0.0819582	0.722975	0.842813	340	93571679	93571758	11	-2.22256	0.000289783	0.00140288	72	ENSG00000246985	-	SOCS2-AS1	145.88	0.202607
chr12	93677377	93677938	93677360	93677430	165	0.689669	0.000576102	0.00262216	453	93677886	93677940	11	0.891341	0.165223	0.316253	38	ENSG00000169372	+	CRADD	345.149	0.769179
chr12	95789672	95790191	95790140	95790197	9	1.61369	0.0396603	0.103969	30	95789669	95789725	13	2.1175	0.00311538	0.0118503	38	ENSG00000074527	-	NTN4	3936	3.08655
chr12	95790289	95790763	95790712	95790857	1884	3.18672	1.96676e-208	2.07828e-205	5556	95790273	95790336	3	1.29756	0.228992	0.399662	14	ENSG00000074527	-	NTN4	3936	3.08655
chr12	96399460	96400561	96400289	96400592	227	0.714197	4.30336e-11	5.26011e-10	2067	96399360	96399526	31	0.680422	0.061436	0.147871	127	ENSG00000059758	-	CDK17	1220.08	0.548097
chr12	98515631	98516453	98515607	98515806	3217	-2.49128	2.89004e-151	1.27246e-148	23492	98516316	98516483	32	-4.44987	1.17841e-25	3.46017e-24	419	ENSG00000120802	+	TMPO	6993.87	-2.64456
chr12	100142094	100142864	100142814	100142880	423	-0.927055	7.1322e-14	1.0891e-12	2065	100142089	100142167	39	0.0566081	0.860705	0.926572	175	ENSG00000111647	-	UHRF1BP1L	860.545	-0.900737
chr12	100266863	100267075	100266925	100267089	39	-1.21303	3.51146e-06	2.41947e-05	307	100266863	100266909	4	0.0202931	0.980927	0.990003	23	ENSG00000166153	-	DEPDC4	40.7777	-1.06696
chr12	102120182	102120252	102120166	102120254	322	-2.00491	1.25244e-51	8.85991e-50	1940	102120206	102120257	21	0.617072	0.318963	0.504601	41	ENSG00000185480	+	PARPBP	800.035	-2.05004
chr12	102957673	102958412	102957672	102957726	120	-3.08974	1.61908e-17	3.14861e-16	295	102958350	102958422	21	2.32714	7.92537e-06	5.15765e-05	81	ENSG00000139352	+	ASCL1	126.381	-3.22714
chr12	103965844	103966121	103965806	103966053	2109	0.0650367	0.421763	0.606897	20102	103966073	103966147	11	0.755305	0.338984	0.524852	30	ENSG00000139372	+	TDG	2531.35	0.0613702
chr12	104137415	104138191	104138134	104138302	183	-0.997942	1.04991e-15	1.81577e-14	1887	104137413	104137464	9	0.948843	0.265031	0.443352	24	ENSG00000120837	-	NFYB	1001.26	-0.397275
chr12	104265297	104265527	104265291	104265351	549	-1.20647	7.99704e-24	2.15917e-22	2238	104265493	104265540	6	1.36991	0.25265	0.429024	12	ENSG00000213442	+	RPL18AP3	37999.3	0.424366
chr12	104287021	104287217	104287017	104287105	3106	0.697672	5.06683e-16	8.91982e-15	6699	104287169	104287220	5	2.43278	0.0379503	0.100214	15	ENSG00000198431	+	TXNRD1	8946.53	0.662359
chr12	106247548	106247987	106247919	106248095	541	-0.23973	0.303391	0.486853	5473	106247513	106247592	18	1.2378	0.00642501	0.0222874	90	ENSG00000136026	-	CKAP4	2697.2	-0.406511
chr12	106357811	106357956	106357693	106357858	201	-0.669052	2.6999e-07	2.18745e-06	1551	106357894	106358039	81	0.943739	2.14211e-05	0.000129172	341	ENSG00000013503	+	POLR3B	675.84	-0.632153
chr12	106774681	106774882	106774558	106774735	114	-0.803214	4.48991e-11	5.48258e-10	1780	106774862	106774920	6	-1.08488	0.206188	0.37132	26	ENSG00000111785	+	RIC8B	506.092	-0.738116
chr12	107318433	107320266	107318396	107318480	440	3.19518	2.60487e-125	8.00747e-123	2685	107320216	107320269	7	3.94581	0.000707952	0.00315534	25	ENSG00000151136	+	BTBD11	1584.74	3.5495
chr12	108562595	108562987	108562503	108562664	5839	2.09487	7.55655e-157	3.73568e-154	42106	108562936	108562996	4	5.07926	1.11978e-05	7.10246e-05	32	ENSG00000136003	+	ISCU	6364.18	2.07574
chr12	108564279	108565372	108564277	108564333	37	1.90854	0.000103265	0.000549307	82	108565322	108565429	15	1.88025	0.00474376	0.0170981	42	ENSG00000136003	+	ISCU	6364.18	2.07574
chr12	109097596	109097900	109097578	109097677	1814	-2.88191	1.75364e-132	5.83644e-130	8069	109097855	109097905	4	-2.34988	0.0147204	0.0454776	30	ENSG00000076248	+	UNG	3092.98	-2.14076
chr12	109573285	109573489	109573438	109573524	2950	-0.0807135	0.318598	0.504194	15168	109573267	109573337	9	-0.505796	0.450327	0.631732	42	ENSG00000139428	-	MMAB	1374.52	-0.00578416
chr12	110281266	110281747	110281240	110281326	3977	0.35105	0.000105812	0.000561759	17706	110281627	110281883	70	0.436997	0.0539937	0.133541	586	ENSG00000174437	+	ATP2A2	15375.2	0.295621
chr12	110501625	110502110	110502045	110502125	5438	-0.942107	4.53725e-27	1.4185e-25	20834	110501599	110501673	7	-0.94626	0.183632	0.341026	40	ENSG00000111237	-	VPS29	1928.1	-0.974356
chr12	111598598	111599287	111599247	111599323	413	0.183293	0.14381	0.285025	2029	111598580	111598646	11	-1.22828	0.0077046	0.0260766	94	ENSG00000204842	-	ATXN2	1997.74	0.28038
chr12	111599420	111599560	111599427	111599681	48	1.13232	1.10199e-07	9.37203e-07	424	111599389	111599528	23	1.60941	1.40866e-07	1.18267e-06	208	ENSG00000204842	-	ATXN2	1997.74	0.28038
chr12	112013425	112014224	112013421	112013499	1556	-0.571691	8.8963e-13	1.25343e-11	8458	112014179	112014231	6	-0.777132	0.503166	0.679663	13	ENSG00000089248	+	ERP29	4697.87	-0.732913
chr12	112381828	112382381	112382309	112382422	750	0.944656	1.39879e-22	3.54461e-21	4387	112381826	112381881	4	1.05205	0.279778	0.459892	18	ENSG00000173064	-	HECTD4	3298.35	0.675611
chr12	113135871	113136238	113136187	113136241	10	2.36219	0.00247732	0.0096722	35	113135868	113135920	10	4.23661	0.000231692	0.00114286	30	ENSG00000111344	-	RASAL1	5269.14	3.26883
chr12	113160238	113161446	113161394	113161697	1159	7.168	9.24128e-97	1.69462e-94	4236	113160215	113160311	19	5.78597	3.67582e-08	3.31314e-07	86	ENSG00000123064	-	DDX54	9310.28	0.0324215
chr12	113185074	113185474	113185398	113185492	3690	-0.0864528	0.279831	0.459943	20547	113185042	113185135	57	0.884927	0.000421423	0.00197436	276	ENSG00000123064	-	DDX54	9310.28	0.0324215
chr12	116276812	116277270	116277203	116277288	11	-0.26038	0.564389	0.72866	86	116276810	116276955	16	2.23859	1.28688e-08	1.22482e-07	137	ENSG00000123066	-	MED13L	6656.16	0.890814
chr12	116277123	116277683	116277491	116277703	607	0.645986	3.90445e-11	4.78704e-10	4322	116277124	116277172	9	4.36397	0.000103786	0.000551873	33	ENSG00000123066	-	MED13L	6656.16	0.890814
chr12	118061029	118061174	118061107	118061315	1253	0.0372679	0.690681	0.8213	9158	118060965	118061076	19	1.01842	0.0381974	0.100772	68	ENSG00000176871	-	WSB2	3104.73	0.0999237
chr12	118061465	118062174	118062128	118062176	7	-0.664568	0.537246	0.707876	15	118061447	118061516	32	-0.442184	0.276206	0.455882	107	ENSG00000176871	-	WSB2	3104.73	0.0999237
chr12	118061680	118062437	118062372	118062444	11	-0.703915	0.236209	0.408296	57	118061680	118061728	11	-0.0205448	0.984023	0.991473	17	ENSG00000176871	-	WSB2	3104.73	0.0999237
chr12	118372697	118372906	118372820	118372935	3216	0.428194	4.23446e-08	3.78759e-07	14699	118372698	118372744	4	-0.748316	0.538413	0.708873	13	ENSG00000135090	-	TAOK3	2811.73	0.439465
chr12	118376554	118376865	118376517	118376606	8291	-0.00707056	0.946382	0.972614	23396	118376795	118376881	55	2.02121	4.35847e-08	3.89259e-07	145	ENSG00000111707	+	SUDS3	2438.03	-0.137756
chr12	119989235	119990610	119989204	119989301	1371	0.590738	4.66865e-09	4.6923e-08	6196	119990509	119990615	8	5.06628	1.24388e-05	7.83666e-05	32	ENSG00000135127	+	BICDL1	3279.01	0.419576
chr12	120116355	120116752	120116698	120116866	1954	0.158627	0.0754681	0.173964	8499	120116354	120116432	9	0.479652	0.395442	0.582094	51	ENSG00000111737	-	RAB35	4138.87	0.112479
chr12	120116923	120117117	120116891	120116996	109	1.25224	2.20017e-18	4.48717e-17	1369	120117065	120117145	10	-0.0838773	0.873526	0.933982	63	ENSG00000277283	+	ENSG00000277283	541.999	1.28659
chr12	120469560	120469715	120469637	120469828	9701	-0.33626	0.000159992	0.00081693	92585	120469541	120469628	11	1.49024	0.00320504	0.0121455	73	ENSG00000111786	-	SRSF9	7033.46	-0.339362
chr12	120534355	120534833	120534342	120534408	6838	0.0224159	0.809148	0.896207	14450	120534783	120534852	12	0.464826	0.303779	0.487272	82	ENSG00000022840	+	RNF10	6530.02	-0.0880207
chr12	120903630	120904302	120904072	120904425	304	0.57279	3.6933e-06	2.53629e-05	1867	120903596	120903679	34	0.865236	0.102207	0.22018	60	ENSG00000157837	-	SPPL3	2165.33	0.478617
chr12	121537338	121538134	121538061	121538148	108	-0.954169	0.000466899	0.00216867	254	121537334	121537397	41	-0.810251	0.0641153	0.152902	97	ENSG00000089094	-	KDM2B	2297.66	-0.41347
chr12	121580510	121581004	121580935	121581024	52	-3.48916	3.08237e-16	5.50542e-15	257	121580507	121580565	7	-0.556605	0.477784	0.65686	39	ENSG00000089094	-	KDM2B	2297.66	-0.41347
chr12	121792457	121793655	121793604	121793680	3091	0.962883	2.47626e-36	1.11466e-34	9318	121792430	121792506	73	4.23479	2.36808e-17	4.56945e-16	168	ENSG00000139725	-	RHOF	3040.61	0.872713
chr12	121793783	121794382	121794285	121794399	12	-0.125011	0.759126	0.866197	98	121793779	121793838	5	1.58891	0.020605	0.0603242	36	ENSG00000139725	-	RHOF	3040.61	0.872713
chr12	121797434	121797697	121797296	121797487	27	0.869829	0.000995995	0.00428944	235	121797651	121797701	18	1.41467	0.0876609	0.195584	27	ENSG00000272849	+	ENSG00000272849	30.4289	3.83416
chr12	121800681	121801090	121800962	121801096	28	2.43747	1.20644e-16	2.21954e-15	261	121800676	121800743	9	-0.0507855	0.908434	0.952836	88	ENSG00000212694	-	LINC01089	1169.7	2.01761
chr12	121801077	121802944	121802894	121802963	619	1.81226	3.83109e-39	1.88953e-37	1258	121801009	121801162	58	1.80296	8.4994e-11	1.01384e-09	245	ENSG00000139725	-	RHOF	3040.61	0.872713
chr12	121803282	121803923	121803864	121803965	60	0.526977	0.0417638	0.108414	316	121803277	121803452	362	0.580344	0.000164038	0.000835421	959	ENSG00000139725	-	RHOF	3040.61	0.872713
chr12	121804008	121804570	121803990	121804080	1221	0.421729	1.44151e-06	1.05351e-05	5589	121804525	121804577	5	0.223737	0.806737	0.894879	21	ENSG00000139718	+	SETD1B	5905.26	1.55573
chr12	122021619	122021860	122021616	122021666	11	-1.65201	0.0345233	0.0927528	37	122021806	122021891	76	-0.663127	0.00186348	0.00751076	424	ENSG00000110987	+	BCL7A	1397.25	0.027102
chr12	122021883	122022303	122021820	122021920	233	0.119642	0.427435	0.611615	1015	122022256	122022312	2	-1.40929	0.250304	0.426186	14	ENSG00000110987	+	BCL7A	1397.25	0.027102
chr12	122021997	122023476	122021978	122022147	163	-0.371062	0.00842377	0.0281489	1395	122023426	122023494	37	2.35792	4.70117e-07	3.68594e-06	102	ENSG00000110987	+	BCL7A	1397.25	0.027102
chr12	122422555	122422598	122422539	122422797	1103	1.96496	2.66468e-125	8.16163e-123	14098	122422547	122422604	11	2.62432	0.000223508	0.00110636	45	ENSG00000130779	-	CLIP1	13574.6	2.17756
chr12	122527259	122527791	122527230	122527311	190	-2.73398	4.20487e-44	2.41319e-42	927	122527740	122527796	3	-1.86257	0.0625137	0.149864	24	ENSG00000184445	+	KNTC1	2045.03	-1.82258
chr12	122835456	122836219	122835449	122835557	1606	1.30269	1.56217e-59	1.34207e-57	14191	122836082	122836297	325	4.22256	1.18553e-81	1.66756e-79	1069	ENSG00000130787	+	HIP1R	8710.68	1.28381
chr12	122974757	122975152	122974659	122974867	89	0.435327	0.00186266	0.00750784	1192	122975083	122975160	16	-0.451536	0.356746	0.542379	71	ENSG00000111325	+	OGFOD2	313.32	0.632282
chr12	122980702	122980870	122980672	122980760	3692	-0.142032	0.184781	0.342557	13999	122980822	122980889	73	0.821021	0.0109656	0.0352909	167	ENSG00000182196	+	ARL6IP4	46.2397	-0.0790744
chr12	122980908	122981230	122980903	122981006	865	-0.652058	1.85186e-11	2.33654e-10	3741	122981181	122981241	3	0.0546976	0.958546	0.978946	16	ENSG00000182196	+	ARL6IP4	46.2397	-0.0790744
chr12	122981566	122981666	122981615	122981673	14	-1.75179	0.00011008	0.000582262	110	122981567	122981641	23	-0.165465	0.723076	0.842881	83	ENSG00000150967	-	ABCB9	856.59	-0.477245
chr12	123232913	123233140	123233074	123233263	108	-1.58874	6.78202e-22	1.65701e-20	1292	123232911	123232963	35	0.919574	0.0419388	0.108775	80	ENSG00000051825	-	MPHOSPH9	1287.01	-1.61156
chr12	123270557	123271196	123271149	123271222	18	-0.0893048	0.840122	0.915249	107	123270525	123270607	5	-1.38364	0.193286	0.35414	18	ENSG00000111328	-	CDK2AP1	3369.01	-0.34414
chr12	123271272	123271814	123271719	123271924	1555	-0.50559	1.20458e-09	1.28607e-08	10790	123271256	123271344	31	0.283354	0.361471	0.547103	170	ENSG00000111328	-	CDK2AP1	3369.01	-0.34414
chr12	123363893	123364837	123364720	123364865	1500	0.522511	3.54568e-09	3.61217e-08	8130	123363866	123363951	18	2.09174	1.13264e-05	7.17918e-05	84	ENSG00000139697	-	SBNO1	6894.5	0.688606
chr12	123364965	123365217	123364943	123365025	70	1.69464	1.74056e-21	4.17183e-20	636	123365145	123365229	30	0.174023	0.653364	0.795254	125	ENSG00000256092	+	SBNO1-AS1	90.1615	1.70812
chr12	123388945	123389924	123388831	123389015	535	-0.30727	0.000346645	0.0016496	7470	123389822	123389933	13	0.918176	0.0934648	0.20555	54	ENSG00000183955	+	KMT5A	1623.29	-0.584118
chr12	123389302	123390217	123389266	123389349	47	-0.883616	7.63687e-07	5.80515e-06	665	123390170	123390232	13	3.41202	1.6111e-05	9.94711e-05	45	ENSG00000183955	+	KMT5A	1623.29	-0.584118
chr12	123458124	123458478	123458124	123458221	230	0.203286	0.0849911	0.190894	2601	123458427	123458482	8	-0.481955	0.551917	0.719614	29	ENSG00000184209	+	SNRNP35	836.168	0.224022
chr12	123533718	123533952	123533880	123533974	23	-0.406954	0.221314	0.390161	157	123533718	123533844	306	0.519474	0.0505874	0.126755	364	ENSG00000188026	-	RILPL1	585.54	0.261394
chr12	123584551	123584590	123584523	123584614	43230	-0.160349	0.0820939	0.185822	102017	123584555	123584603	18	0.527217	0.427799	0.611935	40	ENSG00000086598	+	TMED2	9715.48	-0.0859445
chr12	123972742	123972830	123972535	123972850	2396	0.596506	7.31197e-11	8.76524e-10	6129	123972527	123972819	99	2.15529	4.86728e-31	1.81741e-29	689	ENSG00000119242	-	CCDC92	1258.97	0.40325
chr12	124566704	124567590	124567531	124567618	1066	1.2133	1.2987e-34	5.51692e-33	4651	124566676	124566822	28	1.24155	0.000167431	0.000851162	160	ENSG00000196498	-	NCOR2	10870.3	0.504344
chr12	124914198	124914649	124914599	124914664	86523	0.681782	3.83287e-19	8.15749e-18	117954	124914181	124914281	42	3.81885	1.05051e-15	1.81644e-14	150	ENSG00000150991	-	UBC	31117.5	0.357104
chr12	124914993	124916415	124916369	124916497	27	3.40033	2.63677e-08	2.41864e-07	82	124914914	124915146	57	2.48464	5.63285e-24	1.53458e-22	384	ENSG00000150991	-	UBC	31117.5	0.357104
chr12	128823446	128823982	128823718	128823990	233	0.20046	0.0910658	0.201403	1731	128823443	128823536	11	-0.808696	0.0446344	0.114489	113	ENSG00000139370	-	SLC15A4	995.282	0.0475218
chr12	131711094	131711863	131711075	131711148	1777	0.317309	0.000879419	0.00383624	4596	131711812	131711867	7	3.97031	0.00209103	0.00832041	15	ENSG00000061936	+	SFSWAP	2878.64	0.377628
chr12	131828400	131830513	131828374	131828462	1546	-0.20969	0.027755	0.0774484	3687	131830443	131830518	152	0.970705	3.65041e-05	0.000211033	335	ENSG00000198598	+	MMP17	913.686	-0.220985
chr12	131896273	131896487	131896251	131896347	50	0.464371	0.129353	0.263005	187	131896362	131896505	9	2.40861	7.215e-05	0.000395681	55	ENSG00000279283	+	ENSG00000279283	101.945	1.08591
chr12	131929275	131930326	131929194	131929328	4874	-0.614081	5.24037e-14	8.07215e-13	12556	131930267	131930332	7	-0.433395	0.508697	0.684198	39	ENSG00000177192	+	PUS1	2115.33	-0.758415
chr12	132560045	132561023	132560020	132560127	1210	-0.530541	8.376e-08	7.21714e-07	6206	132560972	132561028	12	-0.487354	0.496897	0.673859	34	ENSG00000112787	+	FBRSL1	5489.97	0.272665
chr12	132687650	132687980	132687494	132687703	362	-0.682431	3.324e-12	4.47805e-11	3858	132687932	132687984	7	-0.595228	0.478451	0.657461	24	ENSG00000176894	+	PXMP2	277.12	-0.885933
chr12	132710841	132711436	132710818	132710922	7004	-0.879718	2.26174e-27	7.16099e-26	18842	132711387	132711439	7	0.893712	0.248567	0.423945	31	ENSG00000247077	+	PGAM5	3959.48	-0.958467
chr12	132761305	132761831	132761754	132761864	3182	0.00969133	0.914283	0.956225	13369	132761303	132761360	4	1.12894	0.272904	0.452208	16	ENSG00000176915	-	ANKLE2	4086.91	0.0351118
chr12	132828514	132828841	132828775	132828875	394	0.200565	0.0449598	0.115149	2475	132828501	132828562	8	2.85389	7.93045e-06	5.15937e-05	58	ENSG00000090615	-	GOLGA3	7317.08	0.414563
chr12	132956092	132956305	132956237	132956318	91	-0.743898	0.0152062	0.0467171	202	132956086	132956139	6	-0.272065	0.725144	0.844236	29	ENSG00000196458	-	ZNF605	123.966	-0.320404
chr12	133080452	133080509	133080361	133080503	94	-0.185457	0.446135	0.627956	301	133080466	133080513	22	3.02732	0.00131456	0.00550654	28	ENSG00000196387	+	ZNF140	704.461	-0.00649999
chr13	19863839	19864934	19863831	19864000	334	-0.0662137	0.571977	0.734485	2128	19864768	19864938	21	-1.0194	0.00131233	0.00549831	214	ENSG00000275964	+	ENSG00000275964	492.719	-0.232657
chr13	19958859	19958886	19958714	19958921	413	0.192453	0.0381661	0.100709	4457	19958841	19958889	13	0.751154	0.451068	0.632374	16	ENSG00000121741	+	ZMYM2	4853.83	-0.119923
chr13	20566595	20567026	20566952	20567099	13	-0.362602	0.358267	0.54381	115	20566574	20566649	24	0.58793	0.213453	0.380658	76	ENSG00000277020	-	ENSG00000277020	9.45072	0.856465
chr13	20567159	20567481	20567115	20567276	211	-0.450429	0.000735003	0.00326284	1443	20567436	20567485	13	1.92411	0.0303568	0.0834034	23	ENSG00000032742	+	IFT88	652.278	-0.73726
chr13	20703762	20704179	20703710	20703792	7	-1.43391	0.0116322	0.0371366	69	20704104	20704321	85	-0.848514	1.09662e-10	1.2933e-09	1464	ENSG00000172458	+	IL17D	89.3322	-1.43756
chr13	20773277	20773960	20773841	20773984	134	-0.61869	0.00176582	0.00716325	561	20773273	20773340	24	-2.05262	7.84831e-06	5.11105e-05	125	ENSG00000150456	-	EEF1AKMT1	447.965	-0.538329
chr13	20902149	20902745	20902696	20903021	212	-0.573488	1.43785e-05	8.96453e-05	1727	20902144	20902203	4	-1.59346	0.0922966	0.20355	25	ENSG00000132953	-	XPO4	1908.78	-0.784713
chr13	20902848	20903176	20903089	20903184	9	-1.07861	0.0169668	0.051262	98	20902793	20902965	14	0.206694	0.588226	0.746573	115	ENSG00000132953	-	XPO4	1908.78	-0.784713
chr13	21176375	21176568	21176438	21176590	484	-2.8723	1.58967e-148	6.61993e-146	4770	21176362	21176428	31	-2.20798	3.30256e-08	2.99523e-07	164	ENSG00000165480	-	SKA3	972.209	-3.12956
chr13	21458621	21459345	21459220	21459470	653	-0.555788	8.64139e-11	1.03019e-09	10005	21458580	21458629	8	-0.693983	0.352318	0.537862	32	ENSG00000180776	-	ZDHHC20	5539.82	-0.280034
chr13	21603915	21604169	21604101	21604177	8662	0.278376	0.000563093	0.00256986	30924	21603894	21603973	60	0.691921	0.0108036	0.0348545	241	ENSG00000165487	-	MICU2	3090.05	0.198751
chr13	22915615	22915751	22915611	22915874	81	-2.85449	1.50488e-27	4.7934e-26	521	22915710	22915770	7	-1.51471	0.070868	0.165435	34	ENSG00000234685	+	NUS1P2	66.0227	-3.84487
chr13	23888867	23889399	23889320	23889437	593	0.120515	0.200209	0.363288	3965	23888782	23888920	68	1.07969	2.07268e-05	0.000125307	282	ENSG00000027001	-	MIPEP	986.308	0.186206
chr13	24160758	24161623	24160739	24160803	805	0.61311	1.68165e-13	2.50062e-12	5929	24161507	24161627	10	1.8166	0.000484527	0.00224205	69	ENSG00000182957	+	SPATA13	3440.02	0.58563
chr13	26221981	26222309	26222232	26222323	824	0.25563	0.00332669	0.0125401	5478	26221908	26222033	140	0.924544	2.64165e-08	2.42286e-07	665	ENSG00000127870	-	RNF6	2991.25	0.0494525
chr13	27450255	27450563	27450514	27450607	624	0.235505	0.0379851	0.100297	2402	27450238	27450327	66	0.910997	0.00143835	0.00596185	232	ENSG00000122033	-	MTIF3	865.946	0.0487288
chr13	27620372	27620528	27620512	27620618	667	0.083094	0.372277	0.558429	4894	27620354	27620424	16	2.21396	6.00975e-06	3.99214e-05	85	ENSG00000139517	-	LNX2	1772.4	0.206151
chr13	27620742	27621351	27620718	27621032	253	-0.0200834	0.876133	0.935373	1398	27621298	27621357	29	0.655909	0.227067	0.397263	54	ENSG00000186184	+	POLR1D	3161.44	-0.118017
chr13	28138222	28139268	28138189	28138261	194	0.766012	3.20625e-08	2.91256e-07	1115	28139009	28139342	146	0.089263	0.613485	0.765581	645	ENSG00000152520	+	PAN3	2127.47	0.379711
chr13	29594962	29595635	29595589	29595747	168	-1.44279	1.97596e-30	7.12626e-29	1909	29594960	29595026	17	-0.284109	0.517507	0.691788	89	ENSG00000139514	-	SLC7A1	3890.72	-1.52453
chr13	29850581	29850612	29850533	29850726	243	0.696723	1.93863e-08	1.80589e-07	2706	29850577	29850607	6	1.05756	0.35224	0.537819	13	ENSG00000122042	-	UBL3	2606.28	0.403703
chr13	30465142	30465932	30465887	30465945	11078	-1.96418	2.40447e-109	5.69368e-107	59277	30465143	30465193	9	-0.165609	0.822616	0.904369	30	ENSG00000189403	-	HMGB1	8884.08	-1.52292
chr13	30617919	30618457	30617901	30618158	578	0.108651	0.333203	0.519123	3023	30618406	30618475	14	-1.26854	0.0425994	0.110138	54	ENSG00000132952	+	USPL1	1222.27	-0.00466529
chr13	31162207	31162355	31162297	31162388	22	-0.304586	0.426884	0.611055	117	31162207	31162260	6	3.13942	0.0183347	0.0547256	16	ENSG00000120694	-	HSPH1	10324.1	-1.21468
chr13	31199974	31200509	31199948	31200115	415	-0.330949	0.00458561	0.0166059	1797	31200457	31200515	18	1.2604	0.0491846	0.123894	46	ENSG00000187676	+	B3GLCT	315.798	-0.234787
chr13	33350187	33350662	33350603	33350693	25	-2.3351	1.637e-15	2.7968e-14	360	33350169	33350361	27	1.3793	0.000125216	0.000654623	133	ENSG00000133121	-	STARD13	604.952	-0.82594
chr13	33676275	33676730	33676674	33676842	89	-0.630405	5.0802e-06	3.41329e-05	1176	33676271	33676326	12	-0.383462	0.534605	0.705683	44	ENSG00000230490	-	ENSG00000230490	278.392	-0.348866
chr13	36346450	36346743	36346666	36346771	195	-1.40636	1.23755e-17	2.42226e-16	1158	36346444	36346503	8	-0.160566	0.822511	0.904267	32	ENSG00000133104	-	SPART	724.953	-1.4796
chr13	37000380	37000743	37000691	37000764	9	-0.676592	0.328929	0.514723	38	37000359	37000453	25	-1.19207	0.0152355	0.0467885	80	ENSG00000120697	-	ALG5	887.387	-1.0806
chr13	37000787	37001028	37000760	37000853	464	-1.03303	9.42147e-16	1.63409e-14	1681	37000981	37001031	7	-0.565414	0.543379	0.71308	21	ENSG00000120699	+	EXOSC8	991.784	-1.46325
chr13	38349858	38350218	38349822	38349924	1433	0.448635	7.4865e-08	6.48508e-07	7635	38350195	38350274	45	1.4398	2.35496e-08	2.17383e-07	283	ENSG00000120686	+	UFM1	2238.39	0.37261
chr13	39037651	39038062	39037805	39038121	182	-0.161388	0.150875	0.295391	2148	39037648	39037699	7	3.3851	2.39745e-05	0.00014317	44	ENSG00000120685	-	PROSER1	2905.2	0.0165575
chr13	40664858	40666587	40666541	40666623	408	2.18427	1.11253e-68	1.19351e-66	2113	40664842	40664912	49	1.67835	0.000308123	0.00148334	89	ENSG00000150907	-	FOXO1	696.765	2.29467
chr13	41017428	41019315	41019255	41019340	157	-1.99038	5.88712e-20	1.30657e-18	546	41017428	41017476	30	-4.63001	6.56316e-05	0.00036294	41	ENSG00000120690	-	ELF1	4757.39	-0.454997
chr13	41311266	41311901	41311239	41311349	204	-0.141339	0.302746	0.486142	1134	41311755	41311906	13	1.317	0.00377977	0.0140297	84	ENSG00000172766	+	NAA16	851.556	-0.403707
chr13	42047967	42048936	42047950	42048110	344	-0.925579	7.51232e-10	8.1952e-09	1251	42048862	42049081	92	-0.512332	0.00492922	0.0176709	582	ENSG00000102780	+	DGKH	1018.9	-0.383268
chr13	43785899	43786905	43786856	43786930	11	0.504505	0.345084	0.530787	56	43785889	43785932	10	3.67748	2.06951e-05	0.000125141	42	ENSG00000120658	-	ENOX1	35.6979	1.5741
chr13	43879903	43880042	43879876	43879957	212	1.76398	2.31498e-34	9.7266e-33	1164	43880001	43880141	16	1.94518	0.000133886	0.000695261	70	ENSG00000179630	+	LACC1	1164.92	1.88637
chr13	44435446	44436853	44436796	44436865	2790	1.59769	3.3919e-67	3.51825e-65	9710	44435441	44435626	30	1.33658	3.53125e-06	2.43271e-05	253	ENSG00000102804	-	TSC22D1	4809.84	0.764792
chr13	44575760	44577315	44577263	44577444	48	-0.19685	0.230886	0.401873	714	44575756	44575811	5	-0.545742	0.560987	0.726231	20	ENSG00000102804	-	TSC22D1	4809.84	0.764792
chr13	45340630	45341182	45341133	45341199	220956	0.340202	0.000491384	0.00227142	321899	45340599	45340681	7	0.171494	0.74424	0.856173	59	ENSG00000133112	-	TPT1	43560.6	0.345571
chr13	45464914	45465297	45464869	45465036	502	-0.296987	0.000812885	0.00357014	5254	45465232	45465331	9	0.848451	0.122806	0.253269	56	ENSG00000136152	+	COG3	2001.53	-0.012778
chr13	46387366	46387469	46387363	46387472	7	0.00761454	0.98755	0.993462	68	46387328	46387416	10	-0.393129	0.404765	0.591482	89	ENSG00000102445	-	RUBCNL	94.8022	-0.266572
chr13	46553171	46553175	46553166	46553442	386	-0.109374	0.34687	0.532662	1825	46553149	46553180	47	0.116713	0.782991	0.880987	95	ENSG00000136141	+	LRCH1	1279.25	-0.220019
chr13	46796679	46797160	46797095	46797179	656	-1.26537	3.16129e-31	1.18774e-29	2489	46796679	46796749	8	-1.13495	0.11856	0.246637	39	ENSG00000139684	-	ESD	1988.5	-1.47572
chr13	48037725	48037991	48037704	48037798	1402	-0.0894027	0.314511	0.499587	5913	48037830	48038004	210	0.334787	0.00970173	0.0318096	1320	ENSG00000136159	+	NUDT15	1493.87	-0.0850153
chr13	48532829	48533079	48533029	48533100	37	-0.791991	0.122242	0.252377	69	48532824	48532902	6	-1.26817	0.03668	0.0974597	55	ENSG00000136161	-	RCBTB2	62.7378	-0.757196
chr13	48975922	48976162	48975898	48975975	362	-0.422971	0.00107087	0.00458133	1474	48976036	48976179	46	0.169349	0.541672	0.711688	216	ENSG00000102531	+	FNDC3A	1663.48	-0.379609
chr13	48976661	48976835	48976530	48976709	34	0.107087	0.665609	0.80414	280	48976788	48976836	6	3.51077	0.00410421	0.0150751	19	ENSG00000102531	+	FNDC3A	1663.48	-0.379609
chr13	49791960	49792537	49792514	49792722	190	-0.0844997	0.510808	0.686055	1626	49791956	49791996	4	-0.364157	0.724053	0.843507	18	ENSG00000102753	-	KPNA3	2967.1	-0.16559
chr13	49997052	49997427	49997040	49997120	150	-0.19015	0.188509	0.34745	1058	49997375	49997433	6	2.37499	0.00230922	0.00908283	35	ENSG00000204977	+	TRIM13	388.597	-0.163145
chr13	50124693	50125540	50125492	50125554	1765	1.08686	6.67922e-31	2.47647e-29	3025	50124690	50124753	19	0.329765	0.415474	0.601444	111	ENSG00000231607	-	DLEU2	299.732	-0.311049
chr13	50909790	50910020	50909765	50909863	191	-1.07858	2.62888e-11	3.27201e-10	848	50909978	50910033	5	0.321806	0.611921	0.764515	39	ENSG00000136104	+	RNASEH2B	597.506	-1.24656
chr13	51452011	51453035	51452983	51453043	2854	0.590936	5.63005e-12	7.43776e-11	8470	51452007	51452062	23	1.31882	6.10884e-05	0.000339748	153	ENSG00000102786	-	INTS6	1500.61	0.0989948
chr13	51803851	51804162	51804086	51804183	350	0.376575	0.00847117	0.0282883	1287	51803807	51803973	195	0.621666	0.00010612	0.000563289	851	ENSG00000102796	-	DHRS12	92.6233	0.299582
chr13	52450167	52450629	52450559	52450655	330	-0.302624	0.00685595	0.0235935	2549	52450139	52450242	61	1.27513	8.86763e-06	5.7189e-05	215	ENSG00000136100	-	VPS36	1264.38	-0.459054
chr13	52599993	52600355	52599993	52600044	7	-2.14794	0.00355219	0.0132906	47	52600277	52600363	23	-0.802808	0.0273223	0.0764505	138	ENSG00000273784	+	ENSG00000273784	11.9002	-1.82189
chr13	60396987	60397174	60396961	60397122	66	-1.41867	1.62983e-12	2.24945e-11	552	60397129	60397184	23	0.480666	0.442556	0.624724	41	ENSG00000083544	+	TDRD3	366.82	-0.547726
chr13	60397222	60397456	60397201	60397275	213	-0.33777	0.0253481	0.0718543	894	60397420	60397477	9	-0.344297	0.62855	0.777082	40	ENSG00000083544	+	TDRD3	366.82	-0.547726
chr13	75549790	75550379	75549785	75549851	5151	-0.388672	6.12949e-05	0.000340807	11387	75550328	75550383	4	0.541579	0.476948	0.656083	29	ENSG00000118939	+	UCHL3	117.723	-0.459795
chr13	77026852	77027158	77027107	77027185	743	-0.745304	1.04846e-11	1.35111e-10	2371	77026757	77026899	10	0.363372	0.501603	0.678293	53	ENSG00000005812	-	FBXL3	1016.92	-0.63698
chr13	79405900	79406232	79406152	79406261	177	-0.767389	1.14509e-07	9.72092e-07	1224	79405883	79405948	43	1.33316	0.00277817	0.0107054	86	ENSG00000139746	-	RBM26	1399.25	-0.568172
chr13	81689892	81690288	81689888	81689940	923	-0.476117	0.146696	0.289253	1321	81690239	81690306	342	0.124154	0.664051	0.802978	3115	ENSG00000214182	+	PTMAP5	10042	-0.782472
chr13	91347686	91349021	91347682	91347737	219	-1.60732	1.07964e-08	1.03773e-07	300	91348976	91349034	24	-0.630995	0.225063	0.394712	65	ENSG00000215417	+	MIR17HG	31.6851	-1.52862
chr13	93227330	93228229	93228181	93228231	13	-0.0678175	0.919683	0.959357	38	93227299	93227480	66	-0.245006	0.260237	0.437938	382	ENSG00000278177	-	ENSG00000278177	23.1032	0.794397
chr13	95300967	95301432	95301369	95301463	73	-1.28442	1.24342e-06	9.18184e-06	312	95300966	95301039	12	-2.58295	0.000490646	0.00226838	54	ENSG00000125257	-	ABCC4	295.904	-1.3466
chr13	97433450	97433947	97433884	97433971	32	2.96687	8.15217e-17	1.51429e-15	199	97433450	97433499	9	2.96458	0.00043813	0.00204685	34	ENSG00000286416	-	ENSG00000286416	136.409	3.57695
chr13	97976677	97976922	97976451	97976728	462	-0.493665	2.32671e-07	1.90057e-06	3104	97976876	97976927	7	2.27197	0.0245215	0.069888	22	ENSG00000065150	+	IPO5	4020.34	-0.715502
chr13	98577227	98577476	98577206	98577291	14	1.22794	0.000148757	0.000764967	160	98577430	98577490	5	-1.42996	0.0569762	0.139355	36	ENSG00000224418	+	STK24-AS1	21.2507	1.87255
chr13	99498851	99501305	99498850	99498902	8	-1.10464	0.114871	0.2408	39	99501262	99501316	11	0.322919	0.528525	0.700414	60	ENSG00000125304	+	TM9SF2	5715.82	-0.10011
chr13	102846043	102846563	102845824	102846196	98	-0.346847	0.00974657	0.0319318	1251	102846518	102846567	7	-2.01004	0.135374	0.272243	13	ENSG00000134899	+	ERCC5	98.0027	-0.230466
chr13	110615544	110616345	110615516	110615711	243	0.556611	2.0491e-05	0.000124023	1571	110616300	110616436	100	2.81663	1.06109e-29	3.72046e-28	401	ENSG00000213995	+	NAXD	2269.02	0.378627
chr13	110713260	110713488	110713257	110713312	106	2.00377	3.13307e-10	3.54135e-09	189	110713443	110713495	21	-0.193785	0.65603	0.797122	97	ENSG00000153487	+	ING1	775.391	0.0775215
chr13	110713695	110715352	110713656	110713765	447	-0.513439	2.1578e-05	0.000130025	1908	110715306	110715357	38	1.63158	0.0021846	0.00864593	64	ENSG00000153487	+	ING1	775.391	0.0775215
chr13	111153665	111154133	111153633	111153797	276	0.186243	0.110756	0.234135	2398	111154083	111154136	10	3.13701	4.95993e-05	0.000280201	46	ENSG00000102606	+	ARHGEF7	1765.13	0.0833976
chr13	112587562	112588150	112588085	112588171	1203	-0.866911	9.02466e-22	2.1929e-20	5749	112587559	112587740	112	0.555777	0.0195882	0.0578396	310	ENSG00000126216	-	TUBGCP3	1311.93	-0.595752
chr13	112968469	112969136	112968437	112968496	3	-3.69304	0.00294781	0.0112785	22	112969077	112969161	26	-2.42648	1.95088e-13	2.88473e-12	279	ENSG00000126217	+	MCF2L	919.09	-1.60098
chr13	113001784	113002324	113001762	113001850	67	-2.32017	3.30876e-22	8.23643e-21	512	113002274	113002329	5	-1.72302	0.0915011	0.202152	22	ENSG00000126217	+	MCF2L	919.09	-1.60098
chr13	113208269	113208668	113208594	113208676	303	-0.50385	1.903e-05	0.000115885	1789	113208259	113208340	28	-0.0445995	0.891248	0.943551	164	ENSG00000126226	-	PCID2	1128.54	-0.442649
chr13	113208750	113208962	113208743	113208828	26	0.411568	0.229526	0.400305	143	113208920	113209028	9	-0.071477	0.905504	0.951303	45	ENSG00000139842	+	CUL4A	2595.88	-0.440516
chr13	113209612	113209995	113209511	113209670	1873	-0.479642	5.38927e-08	4.75443e-07	6540	113209946	113210099	9	1.04221	0.0746493	0.172486	53	ENSG00000139842	+	CUL4A	2595.88	-0.440516
chr13	113363614	113364129	113364042	113364148	668	-0.0638128	0.468651	0.648272	4683	113363614	113363661	10	1.59257	0.0183731	0.0548112	36	ENSG00000139835	-	GRTP1	949.75	-0.0511901
chr13	113490737	113490952	113490893	113490987	100	0.684598	2.24392e-05	0.00013476	728	113490720	113490935	18	0.494772	0.102815	0.221211	214	ENSG00000150401	-	DCUN1D2	606.375	0.00145003
chr13	113584752	113585422	113584725	113584813	1435	-1.19124	1.46283e-50	1.01197e-48	11175	113585400	113585454	6	-0.990571	0.162031	0.311731	37	ENSG00000198176	+	TFDP1	3182.79	-1.1489
chr13	114281610	114281813	114281582	114281663	538	0.553101	2.11373e-08	1.95928e-07	2704	114281754	114281832	22	3.21014	2.13421e-10	2.44866e-09	104	ENSG00000169062	+	UPF3A	1107.42	0.172531
chr14	20413214	20413500	20413373	20413504	174	1.62794	2.09757e-28	6.97562e-27	1110	20413188	20413254	7	0.234562	0.686696	0.818731	49	ENSG00000129566	-	TEP1	2688.32	1.40589
chr14	20454647	20454811	20454761	20454859	544	-0.362747	0.00214837	0.00852172	2166	20454642	20454700	6	-0.819072	0.297992	0.48068	30	ENSG00000092094	-	OSGEP	1085.79	-0.208195
chr14	20682865	20684439	20682861	20682931	17	1.52522	0.00243619	0.00952661	82	20684367	20684445	22	3.48286	2.43979e-11	3.04518e-10	112	ENSG00000214274	+	ANG	60.4313	1.85513
chr14	21097384	21098654	21098524	21098748	283	2.61451	3.39328e-75	4.28781e-73	2218	21097383	21097468	6	6.19112	3.99495e-08	3.58511e-07	40	ENSG00000165804	-	ZNF219	4110.01	2.33288
chr14	21098835	21098854	21098809	21098868	10	2.361	0.000104754	0.000556601	54	21098817	21098886	79	3.89897	6.04259e-30	2.13107e-28	305	ENSG00000165804	-	ZNF219	4110.01	2.33288
chr14	21103417	21103659	21103568	21103666	19	-2.32789	3.23058e-07	2.59108e-06	130	21103400	21103469	28	3.59761	2.19809e-10	2.51718e-09	104	ENSG00000165804	-	ZNF219	4110.01	2.33288
chr14	21104090	21104719	21104578	21104724	17	-1.36114	0.0209298	0.0611192	57	21104070	21104154	27	0.564717	0.0721963	0.167947	185	ENSG00000165804	-	ZNF219	4110.01	2.33288
chr14	21383590	21384018	21383951	21384025	6920	-0.841478	2.4301e-21	5.77702e-20	24020	21383568	21383657	22	-1.37648	2.36941e-06	1.67868e-05	245	ENSG00000092201	-	SUPT16H	7995.25	-0.934959
chr14	21476769	21476886	21476824	21476992	73	-1.07419	2.98713e-14	4.6815e-13	1438	21476737	21476817	6	-1.0255	0.090287	0.199987	51	ENSG00000129472	-	RAB2B	513.497	-0.895724
chr14	22872162	22872608	22872136	22872237	122	0.0764267	0.661429	0.801286	619	22872549	22872694	16	-0.158188	0.660129	0.8002	135	ENSG00000197324	+	LRP10	22892.4	1.42373
chr14	23094757	23095127	23095072	23095154	1980	0.119572	0.14624	0.288669	12767	23094679	23094808	98	0.299673	0.08002	0.182112	647	ENSG00000100813	-	ACIN1	10770	-0.10786
chr14	23094895	23095441	23095390	23095459	14	-0.570505	0.308052	0.492379	59	23094888	23094938	11	2.15125	0.00126595	0.00532352	43	ENSG00000100813	-	ACIN1	10770	-0.10786
chr14	23301401	23301573	23301462	23301718	48	0.872156	7.10773e-07	5.43125e-06	801	23301387	23301452	28	0.225209	0.569372	0.732535	107	ENSG00000235194	-	PPP1R3E	584.735	-0.547742
chr14	23302015	23302858	23302789	23302865	107	-1.45641	3.14621e-07	2.52749e-06	271	23301963	23302042	17	-0.17497	0.670964	0.807813	106	ENSG00000235194	-	PPP1R3E	584.735	-0.547742
chr14	23321456	23321877	23321442	23321512	13282	0.160963	0.0652994	0.155086	44611	23321717	23321908	23	0.386775	0.251173	0.427235	152	ENSG00000100836	+	PABPN1	3020.92	0.0836692
chr14	23322005	23322304	23321927	23322098	81	-2.28078	8.36076e-28	2.69765e-26	708	23322255	23322314	9	-1.85956	0.0199781	0.0587945	39	ENSG00000100836	+	PABPN1	3020.92	0.0836692
chr14	23567172	23567508	23567445	23567526	60	-1.37742	8.14973e-06	5.29104e-05	263	23567172	23567221	9	0.689837	0.257361	0.434621	49	ENSG00000213983	-	AP1G2	4785.39	-0.193147
chr14	23567568	23567787	23567705	23567808	896	-0.101311	0.247621	0.422763	5682	23567565	23567621	7	-0.189487	0.758613	0.865872	43	ENSG00000213983	-	AP1G2	4785.39	-0.193147
chr14	23630114	23631948	23630115	23630166	363	4.1957	1.37271e-55	1.06073e-53	592	23631907	23631956	6	4.41971	7.99149e-05	0.000434422	34	ENSG00000100867	+	DHRS2	4123.57	3.36684
chr14	23953769	23954138	23953750	23953843	5668	0.248856	0.00400213	0.0147553	11699	23954087	23954156	63	-0.717191	0.00105754	0.00452935	404	ENSG00000157326	+	DHRS4	1758.32	0.0215977
chr14	24036444	24036880	24036439	24036516	18	-0.00327999	0.9954	0.997648	63	24036832	24036883	4	-1.0627	0.149323	0.293031	34	ENSG00000225766	+	DHRS4L1	2.93196	-0.176447
chr14	24094310	24094652	24094304	24094362	2058	-1.01956	2.00211e-21	4.77569e-20	4071	24094606	24094656	4	1.45242	0.219948	0.388474	12	ENSG00000100889	+	PCK2	2002.45	-1.07087
chr14	24114190	24114411	24114186	24114240	8	-0.257294	0.753479	0.862412	26	24114361	24114434	4	-0.251592	0.668763	0.806335	52	ENSG00000100897	+	DCAF11	3899.15	-0.182737
chr14	24114811	24115019	24114783	24114883	1167	-0.168608	0.0673969	0.159001	6290	24114877	24115027	61	-0.086012	0.69605	0.824893	388	ENSG00000100897	+	DCAF11	3899.15	-0.182737
chr14	24146750	24147230	24147177	24147306	406	0.330069	0.00674544	0.0232558	2186	24146722	24146963	162	-0.313152	0.0577673	0.140927	757	ENSG00000100911	-	PSME2	2074.4	-0.134838
chr14	24188385	24188796	24188748	24188842	3821	-1.13038	4.47257e-47	2.79448e-45	13657	24188344	24188436	63	0.281429	0.190637	0.350541	380	ENSG00000196497	-	IPO4	111.442	-0.966155
chr14	24195364	24195440	24195364	24195701	777	-0.126226	0.130261	0.264368	11021	24195327	24195539	14	0.718243	0.0267644	0.0751578	163	ENSG00000100926	-	TM9SF1	606.571	-0.202569
chr14	24213183	24213487	24213412	24213501	6811	0.116416	0.246422	0.421197	24860	24213167	24213250	98	0.217925	0.3365	0.522412	337	ENSG00000254505	-	CHMP4A	101.011	-0.298075
chr14	24232462	24232519	24232442	24232535	129	0.0383378	0.803503	0.893126	817	24232473	24232547	41	-1.32371	0.000195799	0.000981096	166	ENSG00000100938	+	GMPR2	2383.55	-0.677057
chr14	24232655	24232848	24232615	24232753	210	-0.663911	6.76098e-06	4.45476e-05	1053	24232776	24232853	38	-1.61337	0.00616903	0.0215054	66	ENSG00000100938	+	GMPR2	2383.55	-0.677057
chr14	24242400	24242622	24242559	24242656	264	0.283419	0.00886471	0.0294235	2216	24242387	24242469	75	1.71178	1.4589e-11	1.86078e-10	296	ENSG00000092330	-	TINF2	1893.79	0.137678
chr14	24271219	24271594	24271413	24271610	1171	2.11998	1.03918e-101	2.10668e-99	5128	24271193	24271297	246	2.22292	1.2266e-72	1.4543e-70	1764	ENSG00000100949	-	RABGGTA	3149.11	1.72208
chr14	24429953	24430200	24429934	24430141	4276	1.42153	1.58441e-70	1.79784e-68	11314	24430130	24430208	7	1.03266	0.052778	0.131178	60	ENSG00000100441	+	KHNYN	8340.88	1.63645
chr14	24430645	24430968	24430895	24430983	42	3.15716	1.15474e-17	2.2649e-16	201	24430577	24430694	272	3.82711	2.23736e-43	1.26683e-41	477	ENSG00000139899	-	CBLN3	255.939	2.60184
chr14	24442393	24442740	24442664	24442765	208	-0.140298	0.278948	0.458871	1727	24442375	24442448	4	0.400292	0.511349	0.686553	46	ENSG00000100445	-	SDR39U1	1201.68	-0.31596
chr14	29926826	29927627	29927576	29927630	14	1.30217	0.036529	0.0971294	43	29926821	29926873	6	4.00904	0.0016708	0.00682068	16	ENSG00000184304	-	PRKD1	136.956	1.20769
chr14	31025648	31026378	31026324	31026404	1509	-1.16027	2.94608e-31	1.10837e-29	5860	31025636	31025786	128	-1.80079	2.36965e-14	3.74711e-13	458	ENSG00000196792	-	STRN3	1900.35	-0.496275
chr14	31206790	31207482	31207454	31207546	124	1.36201	1.09321e-26	3.36302e-25	1499	31206789	31206842	6	2.28946	0.0571229	0.139637	14	ENSG00000092148	-	HECTD1	11696.6	0.251069
chr14	31207564	31207792	31207634	31207818	765	-0.0766457	0.388905	0.575558	9086	31207565	31207614	7	3.76628	0.00191114	0.00768018	23	ENSG00000092148	-	HECTD1	11696.6	0.251069
chr14	32076803	32076830	32076791	32076863	23	1.4637	0.00855737	0.0285367	60	32076776	32076876	31	0.0510642	0.879287	0.937255	160	ENSG00000258655	-	ARHGAP5-AS1	33.3059	0.212695
chr14	32938889	32939786	32938851	32938964	38	1.73364	2.10009e-08	1.94834e-07	216	32939735	32939804	55	0.798303	0.00969433	0.0317914	200	ENSG00000151322	+	NPAS3	95.5973	1.0066
chr14	34874209	34875338	34875205	34875362	3146	0.660038	6.69316e-14	1.02391e-12	11353	34874184	34874357	63	-1.1831	8.89977e-09	8.64175e-08	506	ENSG00000198604	-	BAZ1A	8835.91	0.501259
chr14	34982681	34982911	34982618	34982756	234	-0.0744234	0.677401	0.812171	639	34982865	34982936	14	0.0855187	0.855473	0.924081	74	ENSG00000100883	+	SRP54	5329.06	-0.200069
chr14	35046365	35046888	35046249	35046502	2743	-0.402291	7.70558e-06	5.02739e-05	26912	35046822	35046914	41	-1.54146	0.000386558	0.00182264	120	ENSG00000151327	+	FAM177A1	2073.09	-0.633862
chr14	35121952	35121969	35121918	35122103	140	0.223591	0.121787	0.251688	1004	35121836	35122004	60	0.0468912	0.842619	0.916799	299	ENSG00000092020	-	PPP2R3C	992.685	-0.126199
chr14	35122075	35122297	35122156	35122304	126	-0.163783	0.25662	0.43388	1156	35122056	35122137	51	0.636887	0.0452582	0.115826	171	ENSG00000092020	-	PPP2R3C	992.685	-0.126199
chr14	35122336	35122520	35122388	35122547	193	0.246749	0.0826173	0.186727	1002	35122307	35122401	70	-0.891373	3.87951e-05	0.000223253	417	ENSG00000092020	-	PPP2R3C	992.685	-0.126199
chr14	35122551	35122881	35122537	35122755	504	-1.47258	3.15913e-36	1.41452e-34	2500	35122817	35122907	22	-0.196904	0.589057	0.747184	127	ENSG00000100890	+	PRORP	274.186	-0.521179
chr14	35403169	35403264	35403214	35403373	709	0.215003	0.163721	0.314081	872	35403148	35403219	27	0.383288	0.352274	0.537824	95	ENSG00000100906	-	NFKBIA	4456.32	0.663632
chr14	35404083	35404325	35404278	35404418	5	-0.839403	0.263806	0.441868	33	35404073	35404137	108	2.37774	2.6943e-18	5.46987e-17	347	ENSG00000100906	-	NFKBIA	4456.32	0.663632
chr14	35404221	35404748	35404626	35404759	5537	0.651786	1.3182e-16	2.4157e-15	16699	35404196	35404274	76	1.37172	2.45676e-08	2.26227e-07	283	ENSG00000100906	-	NFKBIA	4456.32	0.663632
chr14	35826401	35826735	35826290	35826509	1088	0.330343	0.000163583	0.000833453	7619	35826658	35826755	191	1.46034	2.23805e-22	5.614e-21	1164	ENSG00000100916	+	BRMS1L	1169.98	0.545665
chr14	36581370	36582606	36582552	36582616	6	0.0444135	0.944913	0.971908	39	36581292	36581417	7	1.00736	0.147027	0.289729	33	ENSG00000136327	-	NKX2-8	18.8612	-0.317898
chr14	37172136	37172492	37172320	37172597	18	0.186851	0.521458	0.694663	209	37172106	37172187	58	0.305344	0.197515	0.359882	294	ENSG00000183032	-	SLC25A21	106.199	0.865051
chr14	37592817	37594293	37594172	37594308	93	1.54058	9.92162e-12	1.28188e-10	392	37592818	37592867	13	1.07555	0.226489	0.396539	21	ENSG00000129514	-	FOXA1	22532.1	0.811982
chr14	37594436	37595112	37595046	37595131	504	0.872836	5.53054e-20	1.22969e-18	4745	37594415	37594489	48	1.52626	1.44197e-05	8.98755e-05	154	ENSG00000129514	-	FOXA1	22532.1	0.811982
chr14	37595120	37595237	37595185	37595362	21357	0.605649	3.6742e-11	4.51982e-10	62470	37594994	37595171	56	3.1386	2.6665e-21	6.33189e-20	245	ENSG00000129514	-	FOXA1	22532.1	0.811982
chr14	37595962	37598439	37598375	37598443	19	-1.84992	0.00223415	0.00881644	64	37595878	37596131	228	1.88691	4.7105e-26	1.40958e-24	700	ENSG00000129514	-	FOXA1	22532.1	0.811982
chr14	39170486	39170646	39170597	39170650	7	1.72159	0.0408567	0.106486	24	39170471	39170537	18	0.239534	0.619689	0.770507	74	ENSG00000182400	-	TRAPPC6B	2038.8	0.298596
chr14	39175256	39175870	39175245	39175308	2277	0.765347	2.56792e-20	5.80899e-19	10551	39175801	39175888	12	-1.64968	0.00203538	0.00812729	83	ENSG00000100941	+	PNN	14258.3	0.654273
chr14	39266672	39267082	39267009	39267109	141	0.667908	6.9938e-05	0.000384839	622	39266654	39266726	126	0.55029	0.00196202	0.00786334	595	ENSG00000258940	-	ENSG00000258940	131.046	0.83843
chr14	39431617	39432165	39432097	39432180	577	0.999123	1.70004e-13	2.52664e-12	1149	39431614	39431667	7	0.412655	0.624106	0.773984	22	ENSG00000165355	-	FBXO33	1603.77	0.892679
chr14	39432626	39432913	39432607	39432703	14	-1.23636	0.0165991	0.0503019	81	39432864	39432926	3	-3.36864	0.0098947	0.0323319	18	ENSG00000258526	+	ENSG00000258526	24.1729	-1.19214
chr14	44897329	44897571	44897213	44897396	624	0.97593	3.40177e-21	8.02153e-20	3970	44897507	44897802	121	2.04995	1.25244e-28	4.19977e-27	640	ENSG00000179476	+	C14orf28	464.901	1.14466
chr14	45253311	45253541	45253436	45253543	11	-0.817671	0.12615	0.258145	69	45253290	45253454	29	0.0575746	0.853248	0.922887	181	ENSG00000129534	-	MIS18BP1	1727.79	-1.83038
chr14	49598690	49598699	49598487	49598715	75	0.968496	7.45567e-12	9.75352e-11	1238	49598662	49598756	63	0.480077	0.00653106	0.0226108	570	ENSG00000213741	-	RPS29	4450.51	0.250099
chr14	49598948	49599169	49598924	49599025	1054	-1.33047	1.32361e-50	9.16401e-49	9511	49599118	49599195	74	-0.185757	0.525377	0.697927	195	ENSG00000165501	+	LRR1	1573.51	-0.906504
chr14	49768152	49768674	49768124	49768205	2949	1.60362	4.95596e-66	4.99948e-64	7109	49768629	49768679	6	1.45881	0.0641362	0.152938	28	ENSG00000165516	+	KLHDC2	4450.31	1.48553
chr14	49893095	49893456	49892986	49893159	4495	-0.100875	0.287586	0.468737	20222	49893373	49893553	51	1.19959	5.45266e-07	4.23819e-06	300	ENSG00000165527	+	ARF6	9348.15	-0.112685
chr14	50312323	50312549	50312311	50312395	278	-0.195838	0.143251	0.28418	1223	50312493	50312551	4	0.0633142	0.926779	0.962892	36	ENSG00000125375	+	DMAC2L	858.836	-0.102232
chr14	50667935	50668305	50668124	50668355	828	0.225225	0.0102202	0.0332579	7173	50667936	50667986	14	1.25353	0.106484	0.227318	28	ENSG00000151748	-	SAV1	1210.38	0.334571
chr14	52730205	52730436	52730167	52730284	2209	-0.193884	0.0205808	0.0602743	11735	52730412	52730466	5	0.704562	0.314465	0.499541	33	ENSG00000198252	+	STYX	2328.16	-0.11548
chr14	52774398	52775715	52774396	52774449	11	-0.00916994	0.988144	0.993793	44	52775516	52775718	22	-0.202403	0.612242	0.764757	120	ENSG00000259049	+	ENSG00000259049	65.3638	-0.393585
chr14	52774605	52776641	52774606	52774656	4	3.39896	0.0150856	0.0463973	11	52776596	52776642	10	-1.95635	0.163218	0.313317	12	ENSG00000259049	+	ENSG00000259049	65.3638	-0.393585
chr14	52951427	52951817	52951404	52951491	21	-1.44686	3.19824e-06	2.21975e-05	232	52951768	52951823	3	0.177616	0.874381	0.934367	13	ENSG00000288045	+	ENSG00000288045	12.2343	-0.591383
chr14	54487959	54488979	54488789	54489071	1325	-0.321466	0.000732141	0.00325184	10278	54487955	54488007	7	-2.07151	0.0346325	0.0930047	26	ENSG00000197045	-	GMFB	3865.84	-0.597705
chr14	54566108	54567025	54566095	54566159	799	0.557888	1.7901e-05	0.000109642	1248	54566977	54567032	4	0.193801	0.783382	0.881223	32	ENSG00000020577	+	SAMD4A	577.667	0.558589
chr14	54902322	54902825	54902696	54902839	573	-0.273288	0.100235	0.216913	1031	54902323	54902372	5	-0.523165	0.527011	0.699196	26	ENSG00000131979	-	GCH1	1636.3	-0.697099
chr14	55051646	55052066	55051629	55051718	2009	-0.150176	0.0612155	0.147433	10930	55051983	55052087	32	1.37077	8.94559e-06	5.76611e-05	188	ENSG00000168175	+	MAPK1IP1L	4174.96	-0.170518
chr14	55271420	55272077	55271370	55271473	1178	0.490252	1.41298e-07	1.18605e-06	6873	55272028	55272078	97	2.08972	3.95815e-08	3.55473e-07	136	ENSG00000178974	+	FBXO34	1916.97	0.471024
chr14	55580078	55580109	55580044	55580126	81	0.438945	0.0520751	0.12979	338	55580070	55580121	4	-0.57149	0.561665	0.726686	18	ENSG00000186615	-	KTN1-AS1	43.2013	0.0467578
chr14	57268603	57268839	57268787	57268899	1286	-0.473861	6.75164e-08	5.88591e-07	13918	57268495	57268654	67	-0.132871	0.568839	0.732137	346	ENSG00000070367	-	EXOC5	3101.76	-0.527659
chr14	58263715	58265910	58263702	58263774	54	0.152563	0.619906	0.770673	179	58265859	58265912	4	0.534208	0.516656	0.691109	23	ENSG00000258682	+	ENSG00000258682	15.1817	0.267982
chr14	58297882	58298114	58298064	58298144	1164	0.965156	1.68899e-26	5.14524e-25	5484	58297880	58297932	23	0.0274389	0.970356	0.984718	34	ENSG00000139971	-	ARMH4	165.158	4.31652
chr14	58298574	58299092	58298468	58298627	1891	0.988322	9.81306e-26	2.89549e-24	7942	58299041	58299110	14	0.589087	0.231473	0.402641	66	ENSG00000032219	+	ARID4A	3360.94	0.791367
chr14	59188727	59190071	59188613	59188782	687	0.374519	5.76147e-05	0.000321613	6002	59190021	59190076	6	0.421481	0.61487	0.766783	22	ENSG00000100592	+	DAAM1	4275.6	0.32832
chr14	59484187	59484380	59484328	59484412	111	-0.264723	0.215602	0.383271	425	59484182	59484235	4	0.701789	0.464101	0.644274	18	ENSG00000126790	-	L3HYPDH	244.425	-0.39507
chr14	60163577	60165344	60165265	60165378	473	-0.0346598	0.727872	0.846002	4843	60163577	60163604	13	0.685235	0.408795	0.59519	22	ENSG00000100612	-	DHRS7	1519.23	-0.0479038
chr14	60249220	60249769	60249093	60249277	2245	1.06822	7.18447e-37	3.28296e-35	6738	60249608	60249812	371	3.6457	5.99158e-148	2.47075e-145	2151	ENSG00000100614	+	PPM1A	6214.6	1.07585
chr14	60723189	60724315	60724189	60724323	2287	-0.519328	4.98487e-09	4.99262e-08	6890	60722996	60723263	18	-2.40572	1.27957e-14	2.05842e-13	296	ENSG00000100625	-	SIX4	1103.64	-0.562745
chr14	61280745	61281237	61281187	61281448	1174	-0.0831052	0.274541	0.454002	14374	61280722	61280815	26	1.23447	3.4782e-05	0.000202029	191	ENSG00000182107	-	TMEM30B	4561.72	-0.0186846
chr14	61321578	61321645	61321549	61321657	76	-0.703411	0.000634435	0.00285888	485	61321584	61321648	20	0.899536	0.0656923	0.155804	69	ENSG00000027075	+	PRKCH	1805.04	0.97799
chr14	61322684	61322817	61322769	61322840	59	1.18007	0.00655851	0.0226928	100	61322679	61322737	4	0.866794	0.34116	0.526956	19	ENSG00000247287	-	ENSG00000247287	83.8429	1.37198
chr14	61695512	61695840	61695510	61695594	6778	0.920751	2.95791e-26	8.91762e-25	35164	61695794	61695935	11	1.01307	0.137394	0.275407	35	ENSG00000100644	+	HIF1A	16978.5	0.877487
chr14	63641579	63641870	63641718	63641877	296	0.134633	0.261816	0.43972	1516	63641578	63641656	10	1.03286	0.0409574	0.106679	64	ENSG00000140006	-	WDR89	1321.76	-0.0774823
chr14	64503715	64503806	64503533	64503845	226	-0.944107	4.18572e-19	8.88832e-18	3357	64503687	64503858	95	2.28555	5.96946e-47	3.71875e-45	923	ENSG00000089775	-	ZBTB25	786.764	-0.27725
chr14	64503950	64504588	64503931	64504013	83	-0.579492	0.000508318	0.00234214	718	64504536	64504772	50	0.693878	0.00298219	0.011395	350	ENSG00000126804	+	ZBTB1	2560.34	0.190867
chr14	64504725	64505203	64504674	64504844	742	-0.413296	2.44997e-05	0.000146048	4869	64505141	64505240	97	0.540589	0.0059309	0.020791	497	ENSG00000126804	+	ZBTB1	2560.34	0.190867
chr14	64539575	64540241	64540195	64540350	11	-1.90396	9.2225e-05	0.000495162	105	64539567	64539615	20	-2.13649	0.00323803	0.0122545	48	ENSG00000259116	-	ENSG00000259116	2.18801	1.21284
chr14	64971348	64972314	64972113	64972440	1196	0.399187	9.74542e-08	8.33592e-07	10753	64971349	64971395	9	3.71699	0.00541782	0.0191931	13	ENSG00000139998	-	RAB15	5955.18	0.329841
chr14	64986894	64987029	64986854	64986946	274	-0.418283	0.00142414	0.00590847	1957	64986979	64987117	62	1.31023	3.12717e-06	2.17329e-05	228	ENSG00000257365	+	FNTB	474.289	0.244956
chr14	65411908	65412545	65411855	65411935	740	0.637374	1.5905e-13	2.3687e-12	5568	65412396	65412640	387	1.00535	6.32223e-17	1.18295e-15	1868	ENSG00000033170	+	FUT8	5550.16	0.286669
chr14	65413017	65413503	65412713	65413162	526	0.0406846	0.687793	0.819435	4964	65413432	65413515	367	-0.153095	0.300011	0.482997	1347	ENSG00000033170	+	FUT8	5550.16	0.286669
chr14	66508158	66508420	66508136	66508210	294	-0.422749	0.00026002	0.00127036	1839	66508371	66508433	5	1.76973	0.00526293	0.0187174	43	ENSG00000171723	+	GPHN	974.978	-0.215605
chr14	67674320	67674612	67674548	67674652	3706	0.290424	0.00014285	0.000737643	32631	67674263	67674348	74	1.36124	4.46764e-10	4.97729e-09	391	ENSG00000100568	-	VTI1B	5649.17	0.143535
chr14	67695003	67695729	67695677	67695767	2063	-1.04566	4.60779e-34	1.91318e-32	6541	67695004	67695053	6	-1.86437	0.0133872	0.0419536	41	ENSG00000072042	-	RDH11	2544.35	-1.15652
chr14	68792917	68793063	68793014	68793081	17331	1.32892	3.53901e-61	3.17258e-59	36345	68792902	68792964	19	0.274962	0.598346	0.754243	61	ENSG00000185650	-	ZFP36L1	9348.26	1.54875
chr14	68796048	68796080	68796007	68796100	1347	1.41225	1.70419e-60	1.49446e-58	6219	68795959	68796067	4	0.0965165	0.884545	0.939967	36	ENSG00000185650	-	ZFP36L1	9348.26	1.54875
chr14	68977939	68978268	68978221	68978272	8	-0.0182063	0.981041	0.990071	28	68977938	68978084	12	1.19034	0.0338943	0.0913735	52	ENSG00000072110	-	ACTN1	14039.5	0.114057
chr14	68978394	68978748	68978687	68978779	77	-0.312573	0.161586	0.311093	376	68978389	68978438	6	0.183606	0.819606	0.902591	24	ENSG00000072110	-	ACTN1	14039.5	0.114057
chr14	68978861	68979301	68979173	68979330	13903	0.198513	0.0155128	0.0475019	43880	68978860	68978915	6	-0.921205	0.318209	0.503795	21	ENSG00000072110	-	ACTN1	14039.5	0.114057
chr14	69151821	69153118	69152951	69153147	274	-0.121637	0.365068	0.551028	2050	69151808	69151871	12	1.04579	0.0498633	0.125286	61	ENSG00000139990	-	DCAF5	3141.8	-0.00806732
chr14	69191528	69191947	69191497	69191598	129	-0.669535	3.20114e-06	2.22158e-05	1069	69191901	69191955	13	1.16209	0.123644	0.254533	33	ENSG00000081177	+	EXD2	1429.35	-0.632598
chr14	69398420	69398596	69398390	69398472	61	1.13925	3.4304e-07	2.74328e-06	393	69398529	69398614	17	-0.306162	0.501123	0.677966	86	ENSG00000029364	+	SLC39A9	4460.19	0.48503
chr14	69767141	69767684	69767135	69767194	30198	0.741518	4.35351e-23	1.13449e-21	56882	69767636	69767707	21	0.765828	0.0724217	0.168369	92	ENSG00000100650	+	SRSF5	13518.6	0.868253
chr14	69767782	69767839	69767758	69768053	108	2.00462	3.2773e-29	1.12576e-27	667	69767793	69767845	15	3.6855	0.000265594	0.00129535	32	ENSG00000100650	+	SRSF5	13518.6	0.868253
chr14	70641915	70642023	70641893	70641997	1106	1.71887	1.6016e-62	1.47648e-60	7056	70641978	70642029	6	3.69418	0.0068551	0.0235915	13	ENSG00000133985	+	TTC9	2107.06	1.67504
chr14	70808796	70809512	70809477	70809620	310	0.843391	3.52511e-12	4.73691e-11	1729	70808745	70808857	23	0.700923	0.0158621	0.0484191	193	ENSG00000006432	-	MAP3K9	3434.24	1.09665
chr14	70907458	70907578	70907354	70907845	356	0.236232	0.0373214	0.0988286	2075	70907528	70907598	22	1.92541	0.000172941	0.000876271	74	ENSG00000100731	+	PCNX1	2740.08	0.132568
chr14	71320475	71321777	71320360	71320543	915	0.0332196	0.743255	0.855533	2741	71321728	71321888	46	-1.7956	1.5864e-06	1.15163e-05	168	ENSG00000197555	+	SIPA1L1	3552.89	-0.393918
chr14	73058533	73058775	73058511	73058703	463	-0.192473	0.0366393	0.0973701	3670	73058729	73058794	15	-1.21029	0.0213996	0.0622753	77	ENSG00000119707	+	RBM25	8439.51	-0.180812
chr14	73569275	73569488	73569209	73569339	951	-1.08978	3.57455e-19	7.61923e-18	2293	73569440	73569494	6	-0.211429	0.797667	0.889634	23	ENSG00000119673	+	ACOT2	451.585	-0.978607
chr14	73591872	73592056	73591844	73591985	57	-1.35625	1.4769e-08	1.39312e-07	375	73591992	73592095	26	-0.724132	0.0388311	0.102189	151	ENSG00000177465	+	ACOT4	376.24	-1.76248
chr14	73714024	73714380	73714303	73714401	767	-0.68289	9.37472e-10	1.01239e-08	2035	73714022	73714094	8	1.05525	0.0396324	0.103913	64	ENSG00000176903	-	PNMA1	4449.83	-0.460837
chr14	73759495	73760266	73760216	73760309	214	0.0993357	0.423291	0.608043	1488	73759466	73759544	16	1.33998	0.0198181	0.0584027	56	ENSG00000156030	-	MIDEAS	6035.51	0.410886
chr14	73786098	73787207	73787125	73787293	171	-0.0476315	0.712756	0.83625	1287	73786073	73786227	48	1.77245	6.98032e-11	8.38193e-10	251	ENSG00000156030	-	MIDEAS	6035.51	0.410886
chr14	73787349	73787422	73787340	73787401	44	0.563793	0.200667	0.363876	110	73787357	73787444	80	-0.138283	0.559531	0.725123	366	ENSG00000259065	+	ENSG00000259065	112.074	1.32639
chr14	73851946	73852620	73851823	73852020	545	-0.117965	0.197613	0.359992	3860	73852575	73852623	8	1.49857	0.114223	0.239791	19	ENSG00000140043	+	PTGR2	604.123	-0.211052
chr14	73886760	73886786	73886616	73886777	51	1.75453	3.24968e-16	5.78957e-15	429	73886480	73886816	166	0.259399	0.111566	0.235465	759	ENSG00000119725	+	ZNF410	74.4811	0.428376
chr14	73949950	73950118	73950048	73950195	190	1.01059	1.00841e-11	1.30168e-10	935	73949926	73950003	33	-0.00878568	0.97516	0.986727	245	ENSG00000156050	-	FAM161B	562.621	0.922875
chr14	73950309	73950548	73950210	73950369	1155	-0.0920777	0.268309	0.447214	6528	73950498	73950552	7	0.411379	0.569515	0.732626	30	ENSG00000119723	+	COQ6	1382.17	-0.063281
chr14	74018546	74019304	74019164	74019340	162	-0.0578244	0.638414	0.784672	1637	74018541	74018595	6	0.019158	0.97924	0.989052	30	ENSG00000187097	-	ENTPD5	1203.75	-0.162162
chr14	74493764	74494120	74493739	74493818	5909	-0.458213	5.65988e-06	3.77605e-05	16376	74494070	74494140	25	0.264912	0.524237	0.697016	95	ENSG00000165898	+	ISCA2	1017.68	-0.504571
chr14	75176222	75176602	75176529	75176635	8021	-0.228929	0.00722621	0.0246838	43383	75176217	75176276	17	1.05035	0.06527	0.155025	51	ENSG00000170348	-	TMED10	11630.1	-0.287685
chr14	75427726	75427931	75427721	75427775	6	0.295437	0.684033	0.817009	29	75427865	75427938	6	-0.695547	0.229974	0.400773	54	ENSG00000140044	+	JDP2	260.711	0.229846
chr14	76959635	76961729	76959548	76959687	1020	5.41169	2.4602e-108	5.69795e-106	1426	76961683	76961732	8	1.38597	0.1242	0.255305	21	ENSG00000258602	+	LINC01629	128.02	5.27665
chr14	77028087	77028698	77028625	77028732	1466	0.589352	1.64551e-09	1.73513e-08	9637	77028075	77028135	11	-0.547459	0.37265	0.558809	47	ENSG00000119669	-	IRF2BPL	5573.47	0.427596
chr14	77320434	77320882	77320738	77320898	57	-1.78932	3.07216e-24	8.46782e-23	810	77320425	77320507	144	0.340332	0.0870481	0.194499	559	ENSG00000009830	-	POMT2	1850.16	-1.00314
chr14	77321035	77321254	77321029	77321089	2454	0.147799	0.0810375	0.183938	9739	77321176	77321332	37	1.63957	4.73904e-12	6.29806e-11	351	ENSG00000100577	+	GSTZ1	2394.57	0.276501
chr14	77376674	77377093	77377023	77377118	900	-1.07784	2.86302e-25	8.25472e-24	3689	77376664	77376722	17	-1.66726	0.0104685	0.0339313	52	ENSG00000100580	-	TMED8	2730.19	-1.08952
chr14	77760784	77761155	77761107	77761176	1459	0.296266	0.00358538	0.0133932	3280	77760742	77760815	19	-0.218937	0.5571	0.723334	120	ENSG00000100603	-	SNW1	3810.64	-0.0971951
chr14	77800111	77800308	77800094	77800187	82	0.15854	0.430053	0.614083	443	77800262	77800346	6	1.06109	0.0776446	0.17788	48	ENSG00000063761	+	ADCK1	521.343	0.319485
chr14	81219498	81220872	81220820	81220974	2650	-0.749776	6.54723e-21	1.52515e-19	9400	81219494	81219551	243	-0.527138	0.00102983	0.00442276	971	ENSG00000165417	-	GTF2A1	2792.29	-0.178225
chr14	81221071	81221296	81221247	81221418	203	0.904703	5.40793e-10	5.9854e-09	1150	81221037	81221222	85	1.4041	4.05606e-16	7.17329e-15	755	ENSG00000165417	-	GTF2A1	2792.29	-0.178225
chr14	88563030	88563444	88563002	88563113	548	-0.279708	0.000748714	0.00331709	9619	88563393	88563464	17	-0.794326	0.0424798	0.109892	119	ENSG00000100722	+	ZC3H14	4375.97	-0.30093
chr14	89416293	89417109	89417073	89417241	71	0.264566	0.154443	0.300636	550	89416292	89416344	5	-0.190397	0.880422	0.937846	10	ENSG00000053254	-	FOXN3	694.508	0.685409
chr14	89955995	89956572	89955890	89956046	828	-0.499828	3.11372e-08	2.83216e-07	5720	89956524	89956573	15	2.34454	0.0213873	0.0622523	19	ENSG00000042088	+	TDP1	1370.26	-0.92576
chr14	90404383	90405898	90405850	90405902	7	-0.313664	0.759803	0.866511	16	90404377	90404466	118	0.141606	0.56503	0.729072	310	ENSG00000258424	-	ENSG00000258424	14.9641	0.31572
chr14	91060332	91060635	91060566	91060658	466	2.0622	1.47529e-118	4.07566e-116	5795	91060328	91060400	86	1.85355	1.50296e-10	1.75126e-09	248	ENSG00000100784	-	RPS6KA5	1288.31	2.12932
chr14	91125538	91127492	91125525	91125588	21	3.44213	3.42019e-10	3.84869e-09	101	91127447	91127523	20	3.828	3.66498e-08	3.30442e-07	71	ENSG00000133943	+	DGLUCY	908.704	4.97726
chr14	91418201	91418525	91418146	91418252	8	-1.85332	0.000550609	0.00251886	80	91418479	91418538	12	-1.72487	0.0156906	0.0479719	44	ENSG00000258798	+	ENSG00000258798	6.31984	-0.898945
chr14	91509587	91510416	91510223	91510532	1543	1.03693	1.74863e-34	7.39482e-33	22214	91509555	91509667	55	6.2127	8.61688e-24	2.32208e-22	340	ENSG00000100796	-	PPP4R3A	10910.3	1.06438
chr14	91835843	91836454	91836300	91836613	1417	0.0670309	0.429438	0.613464	9020	91835843	91835892	14	1.25179	0.0860915	0.192851	31	ENSG00000165929	-	TC2N	3851.83	-0.103711
chr14	92039572	92040036	92039987	92040075	847	0.0989258	0.28481	0.465457	3500	92039548	92039633	37	-1.34766	7.06663e-06	4.64096e-05	231	ENSG00000100815	-	TRIP11	4041.15	0.0848681
chr14	92040191	92040855	92040807	92040903	6	-1.50335	0.0176644	0.0530528	52	92040152	92040244	79	0.113436	0.555797	0.722388	473	ENSG00000100815	-	TRIP11	4041.15	0.0848681
chr14	92121489	92121705	92121639	92121730	11579	0.0647579	0.469082	0.648709	40531	92121480	92121537	10	-1.21742	0.0609951	0.14702	45	ENSG00000183648	-	NDUFB1	1062.19	-0.0147933
chr14	92121971	92122376	92121954	92122037	1891	-0.282372	0.0006172	0.00279059	7095	92122327	92122398	7	0.769743	0.162908	0.312886	57	ENSG00000165934	+	CPSF2	5032.09	-0.181068
chr14	92513663	92513755	92513639	92513714	37	0.3179	0.377134	0.563335	128	92513709	92513788	7	0.848351	0.196862	0.359019	42	ENSG00000100599	+	RIN3	318.173	0.0835034
chr14	93115480	93115893	93115749	93115931	309	-0.969224	2.33707e-17	4.51374e-16	2716	93115435	93115533	23	0.0144993	0.959905	0.979701	215	ENSG00000100605	-	ITPK1	3971.13	-0.991374
chr14	93184498	93184896	93184806	93184902	253	0.190571	0.109824	0.232673	1862	93184499	93184551	7	-0.812633	0.277721	0.457481	33	ENSG00000165943	-	MOAP1	2659.99	0.417174
chr14	93184983	93185190	93184958	93185111	1071	0.442788	6.97679e-08	6.0703e-07	11054	93185129	93185191	4	1.82344	0.0186816	0.0556081	29	ENSG00000259066	+	ENSG00000259066	11.052	0.9559
chr14	93332648	93333028	93332973	93333143	835	0.483136	4.6378e-08	4.12609e-07	5059	93332466	93332789	117	2.18224	4.25752e-29	1.45596e-27	605	ENSG00000011114	-	BTBD7	3234.93	0.565076
chr14	94080626	94081201	94081134	94081216	3870	-0.0469997	0.558597	0.724512	15746	94080612	94080676	16	0.401078	0.469867	0.649445	52	ENSG00000089737	-	DDX24	10395.2	-0.0189086
chr14	94769768	94770237	94770061	94770255	391	-0.339189	0.00453766	0.0164527	1669	94769760	94769809	8	0.224854	0.82041	0.903085	17	ENSG00000133937	-	GSC	283.313	-0.351062
chr14	95156895	95157391	95157321	95157558	1832	0.0819324	0.327973	0.513739	26257	95156890	95156943	5	-0.677757	0.366991	0.553159	31	ENSG00000100697	-	DICER1	6882.45	0.0538656
chr14	96204668	96204749	96204665	96204718	11	0.924902	0.203891	0.368199	32	96204688	96204755	12	3.26699	0.00202766	0.00809989	26	ENSG00000168398	+	BDKRB2	577.704	2.54939
chr14	96502088	96502246	96502235	96502335	139	0.383227	0.00239084	0.00936831	1509	96502087	96502136	10	-0.355887	0.666326	0.804611	24	ENSG00000260806	-	PAPOLA-DT	228.06	0.566094
chr14	96502411	96502781	96502379	96502470	22138	0.104543	0.172629	0.326449	109402	96502730	96502854	18	-0.978495	0.0190252	0.0564421	115	ENSG00000090060	+	PAPOLA	12700.8	0.0853912
chr14	99272056	99272192	99272122	99272209	102	-2.16224	2.88378e-11	3.57768e-10	255	99272056	99272077	20	-0.0404673	0.963197	0.981444	23	ENSG00000127152	-	BCL11B	68.2282	-0.561917
chr14	99511067	99513514	99511044	99511117	72	1.99999	2.46974e-09	2.55673e-08	216	99513464	99513515	19	-0.277609	0.688197	0.819643	36	ENSG00000258749	+	ENSG00000258749	2.1269	-0.679253
chr14	99579409	99580169	99580120	99580171	5	0.198312	0.809115	0.896182	24	99579409	99579460	6	0.937473	0.168786	0.321298	34	ENSG00000205476	-	CCDC85C	4526.74	-0.264435
chr14	99604632	99605341	99604535	99604678	6	0.223042	0.626992	0.775924	81	99605272	99605368	14	-1.41336	0.00748817	0.0254419	87	ENSG00000247970	+	ENSG00000247970	3.80523	1.46294
chr14	100018765	100019299	100018752	100018837	26	1.55851	2.52805e-05	0.000150405	146	100019224	100019397	227	0.235955	0.131093	0.265636	889	ENSG00000196405	+	EVL	14911.3	-0.372694
chr14	100019381	100019502	100019377	100019547	528	-1.03596	3.08154e-18	6.23804e-17	2129	100019454	100019519	27	-0.0856521	0.856434	0.924635	76	ENSG00000196405	+	EVL	14911.3	-0.372694
chr14	100238069	100238620	100238465	100238631	251	0.741412	1.66344e-08	1.5602e-07	1665	100238056	100238117	17	-0.541575	0.212575	0.379559	93	ENSG00000258982	-	ENSG00000258982	152.208	1.472
chr14	100239143	100239790	100239131	100239304	514	0.286054	0.00215554	0.00854743	3686	100239734	100239886	10	0.421738	0.292006	0.473719	101	ENSG00000100811	+	YY1	9958.61	0.518614
chr14	100239578	100240028	100239548	100239659	83	0.565239	0.0089688	0.0297177	501	100239967	100240133	49	1.57468	2.68699e-15	4.52575e-14	516	ENSG00000100811	+	YY1	9958.61	0.518614
chr14	100305087	100306000	100305954	100306002	7	4.55027	0.000168414	0.000855541	22	100305064	100305137	12	1.02412	0.107778	0.229392	53	ENSG00000197119	-	SLC25A29	6808.77	0.261368
chr14	100305687	100306440	100306389	100306545	3883	0.469106	1.02156e-07	8.71602e-07	12438	100305688	100305758	10	-1.64847	0.0811562	0.184158	26	ENSG00000197119	-	SLC25A29	6808.77	0.261368
chr14	100586870	100587409	100587286	100587426	5	-1.88102	8.9107e-07	6.71308e-06	164	100586859	100586920	7	1.38295	0.0914384	0.20205	26	ENSG00000183092	-	BEGAIN	53.6409	-2.06507
chr14	101809865	101810299	101809848	101809937	1341	-2.18857	3.86267e-92	6.54379e-90	3613	101810238	101810321	21	-1.53311	8.76429e-05	0.000472662	139	ENSG00000078304	+	PPP2R5C	3649.96	-0.235266
chr14	101964572	101965296	101964555	101964620	10258	0.454208	1.36777e-06	1.00318e-05	14458	101965224	101965301	21	-0.896482	0.0531013	0.131831	95	ENSG00000197102	+	DYNC1H1	22702.2	0.421119
chr14	102139429	102139685	102139613	102139770	279	0.200724	0.119772	0.248535	1321	102139415	102139477	61	-2.06503	1.55665e-08	1.46458e-07	191	ENSG00000080824	-	HSP90AA1	86231.4	-0.689329
chr14	102508698	102509775	102509602	102509810	124	-0.0169283	0.895336	0.945575	1586	102508698	102508747	8	2.59158	0.0224639	0.0648834	17	ENSG00000156381	-	ANKRD9	3167.81	0.0182722
chr14	103056779	103057548	103057345	103057667	1947	0.708534	1.17303e-17	2.29918e-16	20265	103056738	103056795	8	0.8494	0.13333	0.269207	50	ENSG00000198752	-	CDC42BPB	14218.6	0.706535
chr14	103334236	103334642	103334177	103334370	2058	-0.365872	0.000120049	0.000630066	9704	103334592	103334663	14	-0.097052	0.874321	0.934367	43	ENSG00000100664	+	EIF5	16198.1	0.0746367
chr14	103521284	103521498	103521351	103521511	58	-0.833981	0.000171984	0.000872025	427	103521261	103521336	49	1.56221	7.3759e-05	0.000403578	123	ENSG00000166165	-	CKB	1176.02	0.201984
chr14	103521687	103522829	103522782	103522837	2189	0.675687	1.12074e-09	1.20111e-08	3100	103521680	103521734	4	0.565655	0.391317	0.578027	40	ENSG00000166165	-	CKB	1176.02	0.201984
chr14	103629210	103629776	103629180	103629276	10475	-0.0315618	0.691096	0.821602	31589	103629730	103629779	7	0.18607	0.808853	0.896036	26	ENSG00000126214	+	KLC1	3640.71	0.36395
chr14	103715042	103715420	103715342	103715458	1541	-1.37989	4.5555e-49	3.02042e-47	7603	103715040	103715092	10	-0.964198	0.331011	0.516861	18	ENSG00000126215	-	XRCC3	2294.25	-1.48533
chr14	103847717	103848811	103847697	103847873	16	0.811198	0.0134769	0.0422003	165	103848760	103848814	4	-2.23055	0.0478238	0.121083	21	ENSG00000258735	+	LINC00637	8.17793	1.61544
chr14	104688020	104689483	104688004	104688071	43	0.209357	0.600731	0.75598	121	104689435	104689487	9	-3.31079	0.0056293	0.0198589	29	ENSG00000203485	+	INF2	11869.2	0.683089
chr14	104689620	104690082	104689598	104689686	988	0.667227	9.34388e-15	1.51786e-13	4837	104690036	104690084	17	3.02162	0.0010205	0.00438582	28	ENSG00000203485	+	INF2	11869.2	0.683089
chr14	104800583	104800951	104800549	104800731	220	0.129326	0.353816	0.539458	1404	104800881	104800979	37	1.31046	5.15351e-05	0.000290053	168	ENSG00000179627	+	ZBTB42	2221.09	-0.148313
chr14	104815691	104815984	104815957	104816057	727	0.763254	2.96599e-12	4.01237e-11	3701	104815682	104815741	8	1.91316	0.0150079	0.0461902	31	ENSG00000279140	-	ENSG00000279140	186.979	0.861632
chr14	104865267	104865823	104865256	104865493	2225	1.62459	1.82663e-72	2.15364e-70	9378	104865776	104865827	14	0.780186	0.306797	0.490997	28	ENSG00000099814	+	CEP170B	15121.3	1.56066
chr14	105248591	105248887	105248557	105248672	219	-0.633	3.2085e-07	2.57411e-06	2466	105248843	105248894	12	-0.13414	0.863143	0.927868	27	ENSG00000184887	+	BTBD6	3108.41	-0.393907
chr14	105300773	105301000	105300873	105301042	56	-0.46472	0.00817341	0.0274273	741	105300761	105300841	23	1.27987	0.000274376	0.0013346	136	ENSG00000185024	-	BRF1	4236.74	-0.0707048
chr14	105301085	105301319	105301257	105301331	44	1.69556	2.98386e-12	4.0359e-11	323	105301059	105301164	32	0.231	0.360122	0.545735	299	ENSG00000185024	-	BRF1	4236.74	-0.0707048
chr14	105314716	105315487	105314711	105314914	336	0.456961	4.2902e-08	3.83378e-07	4600	105315449	105315530	135	-0.457788	0.0204646	0.0599881	535	ENSG00000179364	+	PACS2	6777.86	0.417556
chr14	105487967	105489538	105487957	105488015	7	0.511329	0.562346	0.727222	21	105489489	105489540	6	0.34352	0.699036	0.826902	22	ENSG00000257341	+	ENSG00000257341	0	NA
chr14	105489827	105489995	105489813	105489903	69	0.237083	0.321266	0.506945	354	105489943	105490100	23	-0.565588	0.187564	0.346215	104	ENSG00000185347	+	TEDC1	4329.74	0.000463117
chr14	105490174	105490741	105489957	105490357	47	-0.869134	2.37789e-06	1.68415e-05	634	105490609	105490843	32	0.795728	0.00136196	0.00568032	312	ENSG00000185347	+	TEDC1	4329.74	0.000463117
chr14	105491290	105491677	105491175	105491372	782	0.0653468	0.480624	0.65961	7497	105491534	105491683	290	1.95525	1.05022e-51	7.44807e-50	1612	ENSG00000185347	+	TEDC1	4329.74	0.000463117
chr14	105526602	105528503	105526570	105526653	238	-2.02985	6.31302e-16	1.10584e-14	465	105528378	105528508	47	-0.853214	0.0352615	0.094349	113	ENSG00000184986	+	TMEM121	318.87	-1.52139
chr15	25438284	25439014	25438939	25439124	355	-0.519949	1.0894e-07	9.26963e-07	3025	25438282	25438339	21	0.897938	0.153669	0.299514	41	ENSG00000114062	-	UBE3A	3149.11	-0.516759
chr15	29821580	29822114	29822073	29822129	749	0.275926	0.0188594	0.0560584	2551	29821578	29821627	6	1.53826	0.110685	0.234044	19	ENSG00000104067	-	TJP1	5593.53	0.22375
chr15	29822224	29822458	29822296	29822482	2047	0.311253	0.000440634	0.00205741	13538	29822223	29822273	89	0.607956	0.0719082	0.167392	146	ENSG00000104067	-	TJP1	5593.53	0.22375
chr15	30624367	30625711	30624367	30624416	13	-2.6263	0.0369832	0.0981205	18	30625659	30625712	4	-1.42117	0.242278	0.41587	14	ENSG00000285077	+	ARHGAP11B	44.7678	-2.73949
chr15	33066907	33067940	33067796	33068052	162	0.43449	0.00247534	0.00966493	944	33066883	33066976	29	-0.676184	0.0160238	0.0488405	242	ENSG00000248905	-	FMN1	1745.34	0.537319
chr15	33068118	33068173	33068111	33068266	132	0.7199	0.00122994	0.00518729	365	33068113	33068168	7	-1.0524	0.208907	0.374966	26	ENSG00000248905	-	FMN1	1745.34	0.537319
chr15	34367164	34367195	34367115	34367203	496	-0.128891	0.326854	0.51271	1411	34367165	34367191	23	-1.16389	0.14502	0.28683	31	ENSG00000176454	-	LPCAT4	684.159	-0.130585
chr15	34583001	34583653	34583582	34583729	336	0.420772	0.000257283	0.00125859	2053	34582892	34583052	24	2.4653	1.11455e-12	1.55915e-11	180	ENSG00000215252	-	GOLGA8B	534.019	0.168769
chr15	35546039	35546164	35546113	35546239	296	-0.640086	8.12307e-05	0.000440837	909	35546003	35546088	20	1.47157	0.00334434	0.0125977	78	ENSG00000134146	-	DPH6	236.676	-0.739411
chr15	37100765	37101308	37101242	37101330	15	-1.57662	8.37098e-05	0.00045304	133	37100762	37100826	17	-1.37023	0.00476537	0.0171643	84	ENSG00000134138	-	MEIS2	287.521	-1.63842
chr15	39581078	39581797	39581074	39581128	9371	-0.342733	0.00394802	0.0145825	11628	39581668	39581824	13	2.45667	0.000109611	0.000580107	51	ENSG00000137801	+	THBS1	14386.5	-0.411038
chr15	39586144	39588225	39586142	39586198	8	-0.445683	0.462562	0.642943	51	39588180	39588231	4	1.56756	0.0802292	0.182466	23	ENSG00000137801	+	THBS1	14386.5	-0.411038
chr15	39782649	39782829	39782758	39782855	19	-1.36477	0.000422049	0.00197719	137	39782642	39782702	6	-0.196406	0.749541	0.859803	45	ENSG00000150667	-	FSIP1	97.6766	-1.0593
chr15	40439681	40440765	40439676	40439736	4	1.85538	0.0925716	0.204058	15	40440728	40440781	4	0.165587	0.84786	0.919944	22	ENSG00000140320	+	BAHD1	3188.48	0.981575
chr15	40764067	40764317	40764050	40764141	871	-0.054224	0.589175	0.747284	3478	40764270	40764321	4	1.68354	0.0688555	0.16167	20	ENSG00000137880	+	GCHFR	210.801	-0.308302
chr15	40807088	40807472	40807405	40807481	760	-1.36022	1.23473e-39	6.17996e-38	2873	40807053	40807167	79	0.043625	0.853094	0.922804	337	ENSG00000104129	-	DNAJC17	299.867	-1.34037
chr15	40844047	40844392	40844034	40844129	4494	1.56152	2.3016e-69	2.53344e-67	7487	40844207	40844423	627	-0.410421	1.67476e-06	1.21286e-05	7999	ENSG00000166145	+	SPINT1	7397.26	0.987183
chr15	40844476	40844741	40844459	40844594	463	-0.54354	2.66072e-07	2.15674e-06	2888	40844698	40844761	4	1.11024	0.0637207	0.152142	47	ENSG00000166145	+	SPINT1	7397.26	0.987183
chr15	40873803	40874229	40874176	40874242	518	0.245899	0.0459664	0.117287	1822	40873704	40873902	22	-1.11082	0.000252915	0.00123873	221	ENSG00000104140	-	RHOV	699.04	0.116441
chr15	41116036	41116223	41116083	41116249	230	0.424836	0.00173453	0.00704986	1290	41116033	41116093	27	-0.133227	0.786099	0.882883	68	ENSG00000128908	-	INO80	2312.42	0.0316698
chr15	41493376	41493765	41493371	41493453	5	-2.30832	0.00143352	0.00594379	52	41493720	41493767	10	-2.31299	0.0359283	0.095833	22	ENSG00000137825	+	ITPKA	149.671	-1.68687
chr15	41493873	41494386	41493822	41493907	42	-1.29616	2.65934e-05	0.000157607	218	41494336	41494387	8	1.36641	0.153212	0.298873	18	ENSG00000137825	+	ITPKA	149.671	-1.68687
chr15	42736503	42737127	42737069	42737138	194	0.0161852	0.921342	0.960164	735	42736504	42736552	11	-0.274479	0.614327	0.766286	57	ENSG00000140326	-	CDAN1	968.256	-0.0270549
chr15	43330318	43330582	43330502	43330607	44	-0.774587	7.18835e-05	0.000394414	539	43330303	43330388	19	-0.788618	0.0185954	0.0553923	175	ENSG00000168806	-	LCMT2	829.751	-0.588013
chr15	43792329	43793193	43792304	43792398	12390	0.252263	0.00830297	0.0277988	44992	43793146	43793201	12	0.964162	0.152808	0.29834	38	ENSG00000140264	+	SERF2	15976.9	0.0827705
chr15	44663185	44663657	44663506	44663694	480	0.130498	0.279467	0.459461	2452	44663186	44663232	10	-0.429226	0.683031	0.816296	17	ENSG00000104133	-	SPG11	1562.96	0.027957
chr15	45587235	45587289	45587199	45587272	7	-1.91238	0.0041548	0.0152418	54	45587252	45587350	20	1.78429	8.12754e-07	6.15378e-06	141	ENSG00000104164	+	BLOC1S6	1069.16	-0.354768
chr15	48331428	48331855	48331405	48331505	879	0.300228	0.0121273	0.0385122	2163	48331808	48331873	29	-2.25367	9.0478e-05	0.00048671	81	ENSG00000128951	+	DUT	1150.05	-1.78738
chr15	50354243	50354863	50354812	50354899	814	-0.471065	6.83781e-06	4.50118e-05	3589	50354226	50354322	286	2.93532	4.78543e-61	4.27633e-59	873	ENSG00000285410	-	GABPB1-IT1	899.13	-0.251673
chr15	50354986	50355162	50355108	50355187	743	-0.24471	0.0199933	0.058829	7063	50354931	50355018	205	-0.123256	0.318349	0.503941	1884	ENSG00000104064	-	GABPB1	2220.01	0.134965
chr15	50686126	50686796	50686664	50686816	2027	-0.127612	0.160949	0.310144	7260	50686126	50686177	5	0.231067	0.818294	0.901805	15	ENSG00000092439	-	TRPM7	4792.87	-0.146149
chr15	50765487	50765701	50765534	50765726	4372	0.192262	0.00684199	0.023556	37317	50765448	50765539	36	0.85244	0.0108066	0.0348616	158	ENSG00000138600	-	SPPL2A	4791.55	0.13804
chr15	50908698	50909108	50908675	50908777	1293	0.0492718	0.565267	0.729225	8660	50909059	50909179	38	6.21075	8.75289e-13	1.23425e-11	171	ENSG00000081014	+	AP4E1	2813.88	0.0623532
chr15	51829652	51830245	51829624	51829724	5544	0.183947	0.0444244	0.114046	29837	51830200	51830262	3	4.35205	0.000411077	0.00192985	20	ENSG00000138594	+	TMOD3	6963.06	0.23417
chr15	51971425	51971786	51971705	51971805	1251	-0.349423	3.64346e-05	0.000210716	8925	51971423	51971561	26	0.457057	0.211736	0.378582	130	ENSG00000166477	-	LEO1	3546.25	-0.500572
chr15	52019228	52019507	52019203	52019298	1426	0.495018	4.32485e-08	3.86394e-07	12563	52019461	52019533	9	1.81795	0.00201926	0.00806938	52	ENSG00000069956	+	MAPK6	9336.71	0.582843
chr15	52179474	52179972	52179893	52179996	466	-1.08791	9.23397e-21	2.13571e-19	3670	52179469	52179524	12	-0.522255	0.305021	0.488857	69	ENSG00000069966	-	GNB5	1135.12	-1.11809
chr15	52528995	52529137	52529074	52529160	235	0.362801	0.0082313	0.0276029	1730	52528991	52529054	21	1.46895	0.0183134	0.0546758	49	ENSG00000197535	-	MYO5A	3610.95	0.575669
chr15	52678711	52679319	52679281	52679394	3685	2.3666	3.02988e-210	3.37019e-207	24071	52678684	52678857	24	1.41296	0.000126835	0.000662352	143	ENSG00000047346	-	FAM214A	6898.16	2.13592
chr15	52679520	52679713	52679427	52679574	7	2.15472	2.84563e-05	0.00016773	74	52679660	52679733	161	1.71743	2.1409e-13	3.15192e-12	426	ENSG00000287500	+	ENSG00000287500	11.8658	3.2767
chr15	55318938	55319122	55319017	55319169	263	-0.237003	0.0502425	0.126059	1788	55318935	55319059	55	-0.646086	0.016293	0.049494	277	ENSG00000069974	-	RAB27A	335.792	-1.34703
chr15	55408139	55408293	55408226	55408393	405	-0.171186	0.114452	0.240178	3733	55408132	55408186	3	0.420177	0.633962	0.781404	20	ENSG00000260916	-	CCPG1	379.865	-0.174046
chr15	55742238	55743064	55743007	55743095	61	-0.756456	0.000241325	0.00118609	490	55742239	55742288	5	-1.87482	0.110066	0.232997	17	ENSG00000166450	-	PRTG	118.387	-0.586232
chr15	56243459	56243878	56243605	56243910	310	1.09276	5.4876e-22	1.34815e-20	2787	56243448	56243511	38	1.18575	0.00187363	0.00754881	115	ENSG00000181827	-	RFX7	1531.12	1.1487
chr15	56243942	56244072	56243933	56243984	5	-0.572869	0.425814	0.61004	33	56244009	56244076	28	0.501106	0.105065	0.224977	183	ENSG00000151575	+	TEX9	132.302	0.396137
chr15	56918674	56919466	56918551	56918726	979	-0.101286	0.316953	0.502267	3454	56919421	56919472	20	1.65017	0.00997734	0.0325617	43	ENSG00000140262	+	TCF12	1012.52	0.0793424
chr15	58330461	58331976	58331931	58332110	158	2.28213	1.81148e-30	6.54146e-29	607	58330462	58330513	8	0.956586	0.209973	0.37636	30	ENSG00000128918	-	ALDH1A2	116.931	2.94541
chr15	58771301	58771973	58771162	58771366	74	0.378091	0.068565	0.161176	513	58771924	58772057	33	0.165419	0.709595	0.833933	81	ENSG00000128923	+	MINDY2	545.85	0.362661
chr15	59105145	59105475	59105128	59105258	1866	-3.67574	2.428e-154	1.15311e-151	5128	59105428	59105478	4	-3.67745	0.00323566	0.0122467	22	ENSG00000157456	+	CCNB2	1070.22	-3.96568
chr15	59372013	59372870	59372806	59372877	2490	1.76176	2.98822e-80	4.12765e-78	4478	59372012	59372063	10	2.26579	0.00356559	0.0133301	32	ENSG00000157483	-	MYO1E	2227.25	1.78048
chr15	60398105	60398719	60398562	60398743	57	1.39956	1.46447e-05	9.11775e-05	188	60398095	60398148	9	-0.598785	0.467922	0.647615	27	ENSG00000182718	-	ANXA2	6763.2	1.3567
chr15	63048492	63049287	63048353	63048659	1715	-0.428993	2.27035e-06	1.61269e-05	11676	63049241	63049291	7	2.49106	0.00553874	0.0195819	26	ENSG00000140416	+	TPM1	5691.31	-0.145654
chr15	63121862	63122407	63121823	63121887	487	-0.151858	0.131029	0.265532	4120	63122362	63122411	13	-0.417346	0.645481	0.789719	22	ENSG00000103642	+	LACTB	1513.74	-0.144535
chr15	63157294	63157474	63157422	63157495	80103	2.42771	7.23635e-196	5.99737e-193	257623	63157209	63157351	98	5.34737	1.24983e-34	5.31467e-33	413	ENSG00000185088	-	RPS27L	9302.84	2.49953
chr15	63157587	63157984	63157922	63158005	14	2.9837	3.93733e-14	6.12187e-13	165	63157482	63157620	47	1.27459	3.70447e-11	4.55441e-10	536	ENSG00000185088	-	RPS27L	9302.84	2.49953
chr15	63600954	63601644	63601582	63601649	12	-0.240754	0.724119	0.843553	42	63600818	63601112	183	-0.233585	0.106055	0.226585	1005	ENSG00000259248	-	USP3-AS1	173.631	0.0278923
chr15	63833247	63833947	63833885	63833954	1174	0.601053	3.41293e-09	3.48323e-08	3183	63833247	63833294	18	5.28214	1.94797e-05	0.000118436	21	ENSG00000103657	-	HERC1	3650.71	0.589429
chr15	65286285	65286883	65286792	65286979	129	-0.287812	0.0642923	0.153203	805	65286267	65286326	3	0.131785	0.891637	0.943706	18	ENSG00000138617	-	PARP16	387.152	-0.617117
chr15	65517365	65517688	65517629	65517717	915	0.147651	0.0919033	0.202828	4468	65517297	65517386	16	1.05904	0.0044531	0.0161836	128	ENSG00000074603	-	DPP8	1892.22	0.191611
chr15	65869490	65871026	65869449	65869625	3542	0.466991	4.09514e-07	3.23812e-06	17946	65870980	65871030	6	0.555475	0.571228	0.734011	17	ENSG00000103769	+	RAB11A	6199.58	0.319133
chr15	66293574	66293733	66293485	66293650	118	-1.47113	1.2433e-22	3.16007e-21	1341	66293666	66293738	11	-2.10493	0.000501185	0.00231179	67	ENSG00000166938	+	DIS3L	845.333	-1.79006
chr15	66499441	66501005	66500949	66501026	58	-0.194455	0.444068	0.626121	309	66499426	66499490	3	0.0602711	0.967561	0.983606	9	ENSG00000174444	-	RPL4	5971.17	-0.0863282
chr15	67065082	67065409	67065279	67065582	38	0.898836	8.05991e-06	5.23754e-05	448	67065077	67065132	18	2.14472	0.0013207	0.00552733	44	ENSG00000259347	-	ENSG00000259347	66.6083	1.24701
chr15	67065841	67066756	67065586	67065895	2501	1.76447	9.42827e-84	1.37894e-81	14182	67066735	67066760	20	-0.0657973	0.921562	0.96031	36	ENSG00000166949	+	SMAD3	13714.3	2.06411
chr15	67254415	67254640	67254580	67254663	472	-0.523849	1.43945e-07	1.20684e-06	3557	67254402	67254468	10	-0.252231	0.604702	0.758848	70	ENSG00000103591	-	AAGAB	3688.67	-0.538202
chr15	67521130	67521642	67521113	67521285	819	-0.862651	2.53843e-22	6.35441e-21	7625	67521571	67521669	130	-1.17636	6.78432e-12	8.90005e-11	785	ENSG00000189227	+	C15orf61	345.802	-0.961276
chr15	68277786	68277944	68277720	68277919	257	0.787787	1.34692e-11	1.72181e-10	2084	68277899	68277945	8	3.07873	0.00328539	0.0124055	22	ENSG00000169018	+	FEM1B	4355.56	0.606413
chr15	68817700	68818161	68818113	68818170	6	-1.60484	0.0583395	0.142004	30	68817671	68817754	16	-0.155552	0.697469	0.825811	104	ENSG00000140350	-	ANP32A	3788.29	-0.813839
chr15	68819132	68820867	68820766	68820901	2618	-0.712774	3.77549e-13	5.46048e-12	10959	68819133	68819185	21	0.314843	0.665243	0.80389	29	ENSG00000140350	-	ANP32A	3788.29	-0.813839
chr15	69414348	69415017	69414324	69414504	991	-3.61332	8.62582e-168	5.17158e-165	4252	69414973	69415042	41	1.56712	0.000973609	0.00420331	74	ENSG00000137807	+	KIF23	2558.28	-3.96882
chr15	71115470	71116248	71115375	71115535	851	-0.0222252	0.783598	0.881314	6459	71116149	71116271	40	0.533345	0.177292	0.332695	144	ENSG00000187720	+	THSD4	4466.99	0.516704
chr15	72208666	72210438	72210386	72210442	24	-0.247992	0.63337	0.780917	62	72208666	72208717	6	-2.87039	0.0255626	0.0723623	21	ENSG00000067225	-	PKM	67891.4	0.126226
chr15	72230468	72231189	72231138	72231217	18471	0.110802	0.214396	0.381887	36076	72230461	72230640	44	0.943307	0.000183577	0.000925781	321	ENSG00000067225	-	PKM	67891.4	0.126226
chr15	72231519	72231590	72231542	72231625	80	1.40543	2.26571e-06	1.6098e-05	227	72231515	72231566	73	-0.439994	0.212019	0.378882	149	ENSG00000067225	-	PKM	67891.4	0.126226
chr15	72231702	72231820	72231771	72231822	3	4.19193	0.00105636	0.00452521	18	72231688	72231759	6	1.29178	0.0921052	0.203221	35	ENSG00000067225	-	PKM	67891.4	0.126226
chr15	72375767	72375992	72375933	72376024	1741	0.405205	1.0702e-06	7.9717e-06	8913	72375678	72375839	55	2.57646	3.32903e-19	7.10844e-18	276	ENSG00000213614	-	HEXA	3326.87	0.341267
chr15	72376117	72376182	72376092	72376187	77	-0.433242	0.118876	0.247094	235	72376113	72376200	40	2.13097	1.72185e-19	3.7313e-18	365	ENSG00000260339	+	HEXA-AS1	146.2	2.42423
chr15	72473814	72474208	72474149	72474231	54	0.464301	0.0840215	0.189197	234	72473810	72473862	35	1.64721	4.72636e-05	0.000268117	115	ENSG00000261423	-	TMEM202-AS1	148.221	1.68909
chr15	72474329	72474931	72474311	72474381	8808	0.898741	1.03023e-26	3.17621e-25	17849	72474881	72474947	67	0.743556	0.0850048	0.190898	118	ENSG00000166233	+	ARIH1	5885.5	0.627993
chr15	72474476	72475167	72474470	72474565	222	-0.982837	1.10966e-11	1.4265e-10	1621	72475107	72475184	167	1.88633	1.52415e-21	3.66768e-20	567	ENSG00000166233	+	ARIH1	5885.5	0.627993
chr15	73051697	73052115	73051697	73051748	4	-0.226632	0.733253	0.849104	41	73052042	73052122	4	0.086305	0.908713	0.952935	29	ENSG00000067141	+	NEO1	2942.36	-0.0952861
chr15	73221668	73222082	73221632	73221742	23	2.53402	3.09363e-14	4.84392e-13	193	73222030	73222090	149	2.2038	1.29396e-08	1.23099e-07	430	ENSG00000067141	+	NEO1	2942.36	-0.0952861
chr15	73919091	73920043	73919995	73920046	7	1.63164	0.0595829	0.144324	23	73919061	73919159	52	2.46716	1.65274e-10	1.91522e-09	149	ENSG00000261801	-	LOXL1-AS1	1659.45	0.285556
chr15	73926461	73926469	73926448	73926515	712	0.370698	0.00341856	0.0128452	1554	73926416	73926553	241	0.533531	0.000427534	0.00200089	902	ENSG00000129038	+	LOXL1	2793.49	0.310802
chr15	73926638	73927694	73927644	73927966	728	0.429256	1.61369e-05	9.96237e-05	3792	73926619	73926710	717	0.436219	7.20401e-07	5.50084e-06	4339	ENSG00000261801	-	LOXL1-AS1	1659.45	0.285556
chr15	73927808	73928202	73928133	73928349	59	-0.961035	0.000142737	0.000737105	368	73927782	73927880	108	-0.965256	3.8668e-10	4.33648e-09	994	ENSG00000261801	-	LOXL1-AS1	1659.45	0.285556
chr15	74203022	74203188	74202995	74203064	71	1.28534	6.48263e-07	4.98015e-06	262	74203012	74203192	13	1.88723	7.98514e-07	6.0503e-06	125	ENSG00000140481	+	CCDC33	99.4825	1.54992
chr15	74614993	74615560	74615544	74615799	82	1.57719	1.56041e-21	3.75387e-20	893	74614926	74615025	56	0.986145	2.67257e-05	0.000158324	311	ENSG00000260919	-	ENSG00000260919	19.6958	2.53329
chr15	74615850	74616535	74615817	74615905	989	0.225894	0.0270938	0.0759441	5532	74616490	74616541	26	0.792526	0.209901	0.37628	39	ENSG00000179335	+	CLK3	3604.01	0.422539
chr15	74782079	74782447	74782057	74782152	1397	-0.124795	0.178841	0.334786	15027	74782400	74782448	13	0.166007	0.830009	0.908976	26	ENSG00000103653	+	CSK	5611.09	-0.161087
chr15	74842801	74843137	74843077	74843174	373	-0.881421	1.85659e-18	3.79745e-17	3501	74842785	74842848	11	-0.745408	0.236692	0.408839	51	ENSG00000140474	-	ULK3	1892.02	-0.863218
chr15	74843307	74845087	74845039	74845218	57	-0.102322	0.786407	0.883102	127	74843305	74843361	6	-1.38372	0.11962	0.248281	27	ENSG00000140474	-	ULK3	1892.02	-0.863218
chr15	74956379	74956771	74956718	74956809	1046	-1.82038	4.90339e-70	5.49752e-68	4090	74956331	74956429	8	-0.278568	0.497967	0.67492	101	ENSG00000178718	-	RPP25	922.43	-1.96761
chr15	75201881	75202776	75201863	75201991	1605	0.406538	0.000229086	0.00113146	3165	75202729	75202781	6	0.217416	0.771395	0.873833	30	ENSG00000167173	+	C15orf39	1547.34	0.380608
chr15	75368106	75368606	75368073	75368171	829	0.766703	3.9968e-15	6.65105e-14	3049	75368546	75368625	808	0.565116	2.52613e-08	2.32245e-07	4357	ENSG00000260274	+	ENSG00000260274	550.7	0.950621
chr15	75451283	75451689	75451511	75451713	316	-0.833601	9.35362e-11	1.11165e-09	1621	75451284	75451334	7	-1.34436	0.288665	0.469949	13	ENSG00000169375	-	SIN3A	4081.46	-0.317782
chr15	75454391	75455779	75455717	75455808	47	-0.339917	0.0429816	0.11096	733	75454281	75454472	69	1.80121	3.34916e-14	5.22853e-13	342	ENSG00000169375	-	SIN3A	4081.46	-0.317782
chr15	75639806	75640223	75640148	75640238	2242	0.0479259	0.639425	0.78539	8514	75639777	75639857	20	-1.18918	0.00179401	0.00725986	138	ENSG00000177971	-	IMP3	2699.6	-0.164575
chr15	75843446	75843937	75843321	75843708	553	-1.28881	7.77877e-29	2.63562e-27	2545	75843874	75843966	17	-0.117272	0.728168	0.846189	148	ENSG00000140367	+	UBE2Q2	1101.87	-1.66155
chr15	75903877	75904501	75903855	75903965	12549	1.90387	1.43722e-100	2.83209e-98	42179	75904452	75904504	7	2.81452	0.00012333	0.000645844	43	ENSG00000167196	+	FBXO22	7104.74	1.96952
chr15	77420887	77421117	77420884	77420978	103	-0.317657	0.063595	0.151901	817	77421068	77421143	13	-1.72044	0.000510452	0.0023512	91	ENSG00000140382	+	HMG20A	1108.03	-0.148388
chr15	78540443	78540659	78540415	78540511	8175	-0.412548	1.86216e-06	1.33746e-05	32604	78540613	78540666	8	0.885756	0.388096	0.574733	17	ENSG00000041357	+	PSMA4	12697.2	-0.372321
chr15	78872972	78873333	78872789	78873059	7295	-0.192857	0.0256759	0.0726177	65054	78873285	78873338	7	0.391701	0.706798	0.832189	18	ENSG00000185787	+	MORF4L1	2016.23	0.0257405
chr15	79896758	79897001	79896943	79897027	1702	-1.19135	5.11826e-39	2.51556e-37	11407	79896752	79896813	8	-1.67573	0.0240908	0.0688647	41	ENSG00000136371	-	MTHFS	256.357	-0.858249
chr15	79897121	79897373	79897226	79897397	104	1.30627	1.90185e-21	4.54038e-20	1140	79897103	79897174	13	-0.0365191	0.943893	0.971552	67	ENSG00000136371	-	MTHFS	256.357	-0.858249
chr15	79923172	79923755	79923604	79923764	1629	-0.402035	1.2409e-06	9.16561e-06	12350	79923149	79923340	189	0.326394	0.0265362	0.074604	1062	ENSG00000259332	-	ST20-MTHFS	29.4576	0.301637
chr15	80404109	80404195	80404158	80404318	15	-1.58846	6.38387e-05	0.000353833	135	80404089	80404181	20	-0.669171	0.0325475	0.0884449	197	ENSG00000259495	-	ENSG00000259495	36.0372	-0.822845
chr15	80404347	80404950	80404266	80404443	194	-1.26297	3.49472e-25	1.0035e-23	2129	80404919	80404976	9	-0.452055	0.577727	0.738805	29	ENSG00000172379	+	ARNT2	2396.38	0.450165
chr15	80695329	80695717	80695271	80695424	244	0.41634	0.000221678	0.00109814	2036	80695672	80695721	23	1.12032	0.0769005	0.176553	40	ENSG00000136379	+	ABHD17C	1916.16	0.145374
chr15	81000925	81001511	81000913	81001196	1100	0.339975	0.000398146	0.00187404	7144	81001460	81001537	27	2.37583	9.05695e-13	1.27458e-11	187	ENSG00000140406	+	TLNRD1	3876.37	0.523517
chr15	82749702	82750454	82750377	82750468	108	1.53166	5.65896e-12	7.47478e-11	495	82749682	82749754	41	2.27279	8.8214e-10	9.55079e-09	144	ENSG00000286817	-	ENSG00000286817	19.609	2.81444
chr15	82809639	82810216	82809600	82809701	316	1.25535	3.70798e-28	1.21637e-26	2185	82810169	82810274	18	2.52888	7.3463e-07	5.60392e-06	80	ENSG00000156232	+	WHAMM	1552.63	1.23234
chr15	83011065	83011614	83011563	83011650	928	0.106017	0.224793	0.394395	6501	83011044	83011090	4	-0.48715	0.604843	0.758968	20	ENSG00000169609	-	C15orf40	802.306	0.288409
chr15	83207108	83207822	83207365	83207856	2169	-0.144601	0.120283	0.249363	12055	83207106	83207158	8	1.92334	0.0110202	0.0354369	31	ENSG00000166503	-	HDGFL3	5650.64	-0.178032
chr15	84716290	84716407	84716356	84716464	332	0.19246	0.0730875	0.169628	2595	84716198	84716323	6	0.0680125	0.916018	0.957294	40	ENSG00000140612	-	SEC11A	5429.55	-0.406551
chr15	84748591	84748832	84748568	84748666	1305	0.133325	0.147978	0.291182	4081	84748786	84748833	9	0.710781	0.283413	0.463742	36	ENSG00000166716	+	ZNF592	3531.78	0.34088
chr15	84980495	84980589	84980472	84980577	249	0.743079	6.60184e-10	7.2442e-09	2067	84980541	84980593	7	0.32995	0.721625	0.841829	20	ENSG00000073417	+	PDE8A	3789.44	-0.182771
chr15	84981878	84981974	84981839	84981932	104	-0.148973	0.290123	0.471596	987	84981961	84982018	9	2.3282	0.000136644	0.000708195	52	ENSG00000073417	+	PDE8A	3789.44	-0.182771
chr15	88621336	88622298	88621284	88621564	1090	2.23342	1.47078e-145	5.92067e-143	6883	88622250	88622305	16	3.77163	1.27949e-06	9.42434e-06	57	ENSG00000181026	+	AEN	10593.5	2.29424
chr15	89334545	89334814	89334751	89334857	1183	0.057389	0.585249	0.744369	8212	89334543	89334592	7	2.24065	0.00778206	0.0262988	27	ENSG00000140521	-	POLG	5067.67	0.0445395
chr15	89378659	89379553	89378629	89378775	35	2.06143	2.28772e-09	2.37732e-08	172	89379512	89379559	18	6.32293	3.32288e-08	3.01269e-07	43	ENSG00000255571	+	MIR9-3HG	169.999	1.03665
chr15	89496476	89496582	89496532	89496588	260	3.87379	2.69684e-34	1.13198e-32	364	89496443	89496554	20	3.10896	2.44177e-10	2.78491e-09	111	ENSG00000140519	-	RHCG	327.878	4.26551
chr15	89750967	89751248	89751209	89751251	13	3.02699	0.0047232	0.0170349	21	89750964	89751025	53	-0.636361	0.0923132	0.203571	141	ENSG00000166823	-	MESP1	148.117	-0.807545
chr15	90001080	90001870	90001073	90001131	7	0.16445	0.772268	0.874429	58	90001815	90001871	3	-0.827986	0.39199	0.578665	20	ENSG00000140548	+	ZNF710	813.515	0.0200128
chr15	90233569	90233940	90233863	90233972	6368	0.150582	0.0746869	0.17255	59299	90233563	90233617	6	0.0593625	0.946099	0.972489	24	ENSG00000185043	-	CIB1	5912.93	0.104775
chr15	90265692	90266152	90265665	90265745	9294	-0.200896	0.00869549	0.0289357	33191	90266088	90266155	20	1.72328	0.00267386	0.0103563	56	ENSG00000182768	+	NGRN	3279.31	-0.297723
chr15	90902408	90902612	90902376	90902478	29	-1.5831	7.81647e-08	6.75361e-07	286	90902560	90902620	6	0.0986295	0.882181	0.938737	36	ENSG00000196547	+	MAN2A2	3936.21	-0.357304
chr15	90902754	90903242	90902607	90902817	798	-0.207881	0.0309153	0.0846918	3542	90903134	90903337	12	0.365116	0.377841	0.564022	93	ENSG00000196547	+	MAN2A2	3936.21	-0.357304
chr15	90930200	90931842	90930173	90930338	38	0.233231	0.340899	0.526708	293	90931768	90931850	40	-2.00563	1.27684e-07	1.07831e-06	177	ENSG00000140553	+	UNC45A	7045.4	-0.303984
chr15	90931908	90932563	90932487	90932570	642	-0.581015	2.50436e-07	2.03683e-06	4255	90931904	90931961	7	-0.784555	0.349869	0.535545	26	ENSG00000184508	-	HDDC3	786.646	-0.707884
chr15	90954893	90955228	90954882	90954953	390	-0.141314	0.237486	0.409759	2076	90955162	90955255	18	-1.15042	0.00209658	0.00833936	184	ENSG00000166965	+	RCCD1	1694.91	-0.603013
chr15	91022179	91022553	91022361	91022605	214	0.314614	0.00717737	0.0245428	1747	91022157	91022244	23	1.97224	8.48199e-06	5.4903e-05	98	ENSG00000184056	-	VPS33B	263.737	0.281832
chr15	91853707	91854266	91853684	91853772	411	0.494588	7.58063e-05	0.00041395	2026	91854222	91854270	11	2.35828	0.000475448	0.00220523	44	ENSG00000176463	+	SLCO3A1	1208.23	0.281205
chr15	92645252	92645597	92645423	92645602	41	1.78262	1.04172e-05	6.64027e-05	111	92645248	92645300	9	5.00496	6.42891e-05	0.00035612	18	ENSG00000185442	-	FAM174B	3337.42	1.07276
chr15	92655323	92655774	92655611	92655805	1992	0.969108	1.15369e-32	4.57022e-31	9052	92655301	92655398	29	1.86095	7.14833e-11	8.57272e-10	240	ENSG00000185442	-	FAM174B	3337.42	1.07276
chr15	92809475	92809797	92809738	92809899	28	-0.0978362	0.712493	0.836117	251	92809359	92809527	92	0.811281	3.12713e-07	2.51336e-06	737	ENSG00000185442	-	FAM174B	3337.42	1.07276
chr15	92882828	92883662	92882820	92882879	6405	-0.751904	4.18615e-12	5.58876e-11	12946	92883611	92883668	12	0.33353	0.651088	0.793586	31	ENSG00000272888	+	CHASERR	2095.6	0.239269
chr15	93088276	93089210	93089154	93089211	7	5.32706	1.2044e-05	7.60326e-05	23	93088275	93088325	11	4.97113	9.84297e-05	0.00052524	18	ENSG00000182175	-	RGMA	80.9984	3.5068
chr15	96326046	96326058	96325920	96326127	179	-0.0765745	0.633379	0.780917	923	96326011	96326059	13	-1.42269	0.0948622	0.208001	27	ENSG00000185551	+	NR2F2	19638.9	0.252702
chr15	96326290	96327349	96327282	96327364	76	-0.0338412	0.889021	0.94222	329	96326284	96326343	4528	-2.12254	3.06971e-134	1.05488e-131	8239	ENSG00000247809	-	NR2F2-AS1	105.746	1.64157
chr15	96330701	96331000	96330664	96330962	1694	0.300719	0.000880653	0.0038404	16838	96330926	96331005	82	1.71682	2.83077e-11	3.5145e-10	327	ENSG00000185551	+	NR2F2	19638.9	0.252702
chr15	96331817	96332816	96331812	96331869	2606	0.341342	0.00049178	0.00227275	4485	96332812	96332871	20	-0.973611	0.0571956	0.139791	69	ENSG00000185551	+	NR2F2	19638.9	0.252702
chr15	96333117	96333516	96332994	96333168	233	-1.36938	8.39888e-11	1.00269e-09	513	96333389	96333525	54	-0.376091	0.32035	0.506019	123	ENSG00000185551	+	NR2F2	19638.9	0.252702
chr15	97295932	97296320	97295904	97295982	16	-1.74345	0.0184035	0.0548905	44	97296270	97296332	61	-2.07027	2.36921e-07	1.93343e-06	158	ENSG00000259485	+	LINC02253	26.4313	-0.708428
chr15	98648538	98648958	98648394	98648709	2735	0.497543	2.1266e-06	1.51657e-05	10722	98648909	98648982	10	0.989791	0.0615841	0.148119	68	ENSG00000140443	+	IGF1R	33779	1.01644
chr15	98707636	98708068	98707637	98707685	14	0.382794	0.616409	0.76792	30	98708015	98708074	12	0.158465	0.832849	0.910647	34	ENSG00000140443	+	IGF1R	33779	1.01644
chr15	98872973	98873983	98872974	98873024	13	0.387406	0.537578	0.708199	46	98873935	98873990	60	-0.947325	0.00337968	0.0127183	182	ENSG00000140443	+	IGF1R	33779	1.01644
chr15	98891322	98893535	98893469	98893546	18	3.53445	1.16537e-08	1.11468e-07	79	98891310	98891446	212	2.3012	1.07512e-23	2.88345e-22	395	ENSG00000259621	-	ENSG00000259621	2.35417	4.84732
chr15	98897292	98899718	98897096	98897356	54	2.1394	1.53038e-17	2.98093e-16	321	98899579	98899785	10	1.02569	0.0176919	0.0531242	93	ENSG00000140443	+	IGF1R	33779	1.01644
chr15	98899743	98901342	98899739	98900092	394	2.25482	4.09507e-116	1.07177e-113	4266	98901297	98901349	12	0.949691	0.184846	0.34264	32	ENSG00000140443	+	IGF1R	33779	1.01644
chr15	100602605	100603203	100602500	100602683	348	0.0288058	0.801269	0.891944	2286	100603157	100603204	8	1.41907	0.0891974	0.198124	24	ENSG00000183475	+	ASB7	1497.89	0.109958
chr15	100849830	100850469	100849733	100849913	544	1.60532	1.63865e-63	1.54949e-61	3422	100850424	100850493	27	6.10246	2.37198e-08	2.18834e-07	65	ENSG00000232386	+	ENSG00000232386	171.435	1.89044
chr15	100877708	100879630	100877702	100877781	35	6.96785	4.76134e-16	8.39776e-15	287	100879566	100879658	102	4.75115	5.05695e-50	3.42818e-48	574	ENSG00000184254	+	ALDH1A3	3049.44	4.09406
chr15	100919328	100919361	100919310	100919403	20	-0.705588	0.0549935	0.135546	134	100919340	100919364	14	1.47472	0.0810692	0.18399	25	ENSG00000154237	+	LRRK1	139.848	-0.0820746
chr15	101251772	101251945	101251893	101252049	600	-0.588697	1.33614e-05	8.37239e-05	1733	101251763	101251820	4	1.02581	0.220189	0.388773	23	ENSG00000131873	-	CHSY1	1815.57	-0.621398
chr15	101294906	101295247	101295175	101295282	1956	-0.86774	2.31704e-26	7.02357e-25	23823	101294907	101294956	8	3.82309	0.00139064	0.00578641	23	ENSG00000131876	-	SNRPA1	473.905	-0.457997
chr15	101489460	101489706	101489658	101489821	3215	-0.115207	0.300607	0.483635	4848	101489458	101489566	35	-0.393497	0.218659	0.387039	194	ENSG00000140479	-	PCSK6	1705.43	-0.376929
chr15	101652023	101652373	101652217	101652390	1030	0.0298141	0.781221	0.879905	5400	101652024	101652080	12	-0.372862	0.56829	0.731711	40	ENSG00000184277	-	TM2D3	1581.6	0.0284238
chr16	53106	53607	53526	53634	3271	-1.09592	2.32835e-31	8.79488e-30	13153	53093	53217	57	-1.59659	7.845e-09	7.65714e-08	292	ENSG00000161980	-	POLR3K	1988.47	-1.30515
chr16	71644	72628	72576	72647	2633	1.05544	6.38384e-43	3.55276e-41	9751	71641	71785	128	1.59877	3.37458e-25	9.6933e-24	926	ENSG00000007384	-	RHBDF1	4662.87	0.937875
chr16	228802	229123	229061	229145	60	0.827791	0.00380278	0.0141065	237	228724	228850	12	3.79028	0.000122624	0.000642545	34	ENSG00000007392	-	LUC7L	3287.13	0.018404
chr16	229188	229448	229383	229469	1332	0.0193692	0.812529	0.898434	9864	229185	229241	47	1.07997	0.00439173	0.0159833	132	ENSG00000007392	-	LUC7L	3287.13	0.018404
chr16	234498	234684	234480	234581	21	-1.62657	3.25296e-06	2.25385e-05	178	234627	234745	9	-0.23769	0.56969	0.732739	95	ENSG00000167930	+	FAM234A	5409.5	-0.359358
chr16	351936	352677	352601	352708	350	-0.0621831	0.537255	0.707878	4271	351932	351987	11	-0.51116	0.405176	0.591796	51	ENSG00000103126	-	AXIN1	2937.45	-0.165345
chr16	382117	383414	382088	382183	122	-0.526298	0.00115857	0.00491424	860	383338	383442	12	-2.42592	9.67649e-05	0.000517238	72	ENSG00000236829	+	ENSG00000236829	115.377	-0.579167
chr16	397198	397526	397182	397351	2545	-0.831262	4.99066e-17	9.41931e-16	9240	397481	397527	5	-2.59742	0.0121533	0.0385883	27	ENSG00000103202	+	NME4	2302.24	-1.08795
chr16	401944	402570	401850	401964	410	0.459043	4.49537e-05	0.000255958	2223	402509	402575	23	-0.135602	0.838214	0.914089	37	ENSG00000242612	+	DECR2	852.868	0.471383
chr16	527711	528827	527693	527881	341	0.127263	0.198467	0.361112	2948	528777	528839	32	0.24242	0.55238	0.719873	100	ENSG00000103326	+	CAPN15	4506.72	-0.00367861
chr16	568938	569841	568938	568986	17	-1.73638	0.0619874	0.148867	27	569828	569879	7	-0.180906	0.78317	0.881067	38	ENSG00000282907	+	ENSG00000282907	0.577325	-1.36824
chr16	589375	589454	589303	589425	28	0.0454058	0.887324	0.94128	165	589394	589472	30	3.47756	1.81631e-39	9.03195e-38	469	ENSG00000197562	+	RAB40C	2406.13	0.118115
chr16	589661	589816	589655	589721	14	0.0378293	0.939797	0.969429	66	589765	589821	6	0.383993	0.568048	0.731518	38	ENSG00000197562	+	RAB40C	2406.13	0.118115
chr16	636477	637048	636444	636528	51	1.23909	1.2869e-05	8.08784e-05	206	636969	637060	12	2.60123	1.25355e-08	1.19403e-07	114	ENSG00000172366	+	MCRIP2	1184.31	-1.43557
chr16	679552	679801	679727	679815	8	-0.510315	0.213728	0.381027	109	679537	679602	29	-0.0651241	0.889329	0.942468	79	ENSG00000260394	-	LINC02867	9.1196	-0.717171
chr16	680112	680340	680088	680192	239	0.679184	1.0138e-08	9.77779e-08	2211	680270	680343	6	-0.247706	0.615304	0.767097	67	ENSG00000103266	+	STUB1	6518.55	-0.0509406
chr16	680409	680547	680386	680482	6095	0.00446518	0.959928	0.979701	27176	680498	680560	12	-1.52693	0.118273	0.246197	29	ENSG00000103266	+	STUB1	6518.55	-0.0509406
chr16	681476	681988	681461	681589	48	-0.331398	0.439214	0.622017	115	681941	681992	135	-0.23968	0.496034	0.673045	153	ENSG00000103266	+	STUB1	6518.55	-0.0509406
chr16	682481	683731	683461	683759	5	0.70552	0.0977701	0.212859	91	682474	682529	3	-0.881455	0.293217	0.475118	31	ENSG00000161999	-	JMJD8	2610.88	-0.141372
chr16	683804	684139	684069	684152	72	-0.181956	0.209589	0.37584	976	683734	683877	12	0.284842	0.556408	0.722838	76	ENSG00000161999	-	JMJD8	2610.88	-0.141372
chr16	684266	684331	684273	684359	1843	0.00799175	0.927946	0.96335	10779	684264	684319	10	3.62374	2.89165e-05	0.000170205	42	ENSG00000161999	-	JMJD8	2610.88	-0.141372
chr16	684498	684608	684562	684614	6	5.7837	8.89873e-07	6.70526e-06	31	684434	684646	86	3.12647	1.08894e-47	6.97911e-46	732	ENSG00000161999	-	JMJD8	2610.88	-0.141372
chr16	704785	705825	705686	705859	182	-1.2434	1.48346e-30	5.38453e-29	3488	704751	704832	8	1.70641	0.00771814	0.0261172	45	ENSG00000127585	-	FBXL16	1263.11	-1.24444
chr16	720592	721077	720562	720659	51	-1.47058	7.00312e-09	6.88871e-08	343	721003	721106	42	-0.449796	0.131364	0.266089	212	ENSG00000103254	+	ANTKMT	1301.52	-0.254359
chr16	721181	721400	721150	721229	518	-0.519815	6.98346e-06	4.58884e-05	4091	721332	721432	32	0.0509287	0.863973	0.928277	238	ENSG00000103254	+	ANTKMT	1301.52	-0.254359
chr16	726518	726933	726504	726580	66	-1.64538	6.11578e-07	4.71934e-06	218	726924	727004	11	-1.38463	0.0116559	0.0371955	67	ENSG00000103253	+	HAGHL	1678.75	-1.17806
chr16	727283	728217	727277	727377	225	-1.97282	1.5357e-47	9.79049e-46	1871	728145	728237	60	-2.10926	8.57935e-23	2.2011e-21	603	ENSG00000103253	+	HAGHL	1678.75	-1.17806
chr16	727784	728329	727781	727836	12	-1.30887	0.0501847	0.12594	47	728302	728401	172	-1.21387	4.68723e-16	8.27049e-15	1140	ENSG00000103253	+	HAGHL	1678.75	-1.17806
chr16	741133	741322	741274	741359	24	-0.117258	0.736084	0.851001	136	741114	741277	110	-0.460289	0.0149516	0.0460657	665	ENSG00000103245	-	CIAO3	1498.97	-0.165814
chr16	786301	788339	788288	788375	327	-0.249743	0.0192689	0.0570469	3360	786297	786355	4	-0.0222934	0.978616	0.988747	23	ENSG00000007376	-	RPUSD1	2690.65	-0.437559
chr16	795923	797100	795895	795944	4	-0.705777	0.45129	0.632558	22	797055	797105	12	1.03393	0.287744	0.468847	18	ENSG00000127586	+	CHTF18	3316.11	-1.1772
chr16	981083	981587	981533	981615	13	-1.69315	0.000619649	0.00280076	95	981059	981132	6	-1.15577	0.114644	0.240437	36	ENSG00000260807	-	CEROX1	28.7064	-1.62763
chr16	1297221	1299529	1299470	1299609	44	1.50998	2.79884e-06	1.95766e-05	170	1297218	1297274	8	0.18674	0.812287	0.898225	26	ENSG00000260710	-	ENSG00000260710	27.1041	1.64532
chr16	1379169	1379651	1379590	1379681	1456	0.942048	3.30456e-26	9.94143e-25	4752	1379169	1379216	18	2.85644	0.00251485	0.00980426	26	ENSG00000059145	-	UNKL	3545.48	0.97307
chr16	1413880	1414694	1414647	1414726	267	0.860571	7.62903e-10	8.30986e-09	1168	1413878	1413941	8	1.39272	0.0121126	0.0384769	57	ENSG00000059145	-	UNKL	3545.48	0.97307
chr16	1493465	1494444	1493347	1493617	332	-0.652481	6.65411e-10	7.29777e-09	2783	1494397	1494446	4	0.441875	0.52315	0.696062	34	ENSG00000100726	+	TELO2	5236.89	-0.694589
chr16	1610429	1610666	1610577	1610732	58	-0.75397	0.00154856	0.00637398	326	1610423	1610481	9	-0.72738	0.218442	0.386841	51	ENSG00000187535	-	IFT140	907.137	-0.581066
chr16	1678278	1680100	1678264	1678364	13442	0.303488	0.00245702	0.00960181	51128	1680049	1680107	9	-0.961016	0.202225	0.36602	32	ENSG00000206053	+	JPT2	13118.2	0.285257
chr16	1770896	1771542	1771471	1771564	424	-0.936766	7.54968e-20	1.6655e-18	4807	1770892	1770948	9	0.570156	0.410902	0.597136	36	ENSG00000103024	-	NME3	1863.77	-1.16022
chr16	1772809	1773129	1773077	1773159	5023	-0.783869	1.72396e-22	4.35164e-21	30840	1772806	1772938	531	0.574482	9.36934e-06	6.01859e-05	2082	ENSG00000074071	-	MRPS34	4108.95	-0.944504
chr16	1773209	1773471	1773182	1773262	254	0.448231	0.00757659	0.0256969	1149	1773427	1773488	6	-0.196732	0.724519	0.843742	55	ENSG00000197774	+	EME2	3793.6	0.445508
chr16	1826611	1826801	1826738	1826831	1371	0.62602	5.52881e-10	6.11519e-09	8301	1826594	1826663	12	2.3664	0.000845857	0.00370226	39	ENSG00000063854	-	HAGH	2668.15	0.736628
chr16	1826967	1827158	1826936	1827025	372	1.04178	4.58383e-17	8.67664e-16	1692	1827098	1827194	30	1.27546	3.2854e-06	2.27502e-05	256	ENSG00000180185	+	FAHD1	1747.12	-0.325034
chr16	1972054	1972614	1971955	1972127	272	-0.0753768	0.471707	0.65121	2276	1972564	1972621	27	4.39294	7.05068e-08	6.13017e-07	67	ENSG00000183751	+	TBL3	2605.61	-0.277412
chr16	1979495	1979725	1979674	1979743	32	-1.20682	0.0307833	0.0844053	64	1979493	1979546	23	-3.0118	0.000818925	0.00359461	48	ENSG00000196408	-	NOXO1	34.1746	-0.146143
chr16	1984204	1985449	1984058	1984343	1459	-0.683547	4.41153e-19	9.35607e-18	9967	1985379	1985455	9	2.71877	0.0002082	0.00103711	42	ENSG00000127554	+	GFER	1435.01	-0.508466
chr16	1989989	1992208	1989967	1990057	73	-0.891173	9.87638e-07	7.38923e-06	692	1992147	1992217	40	1.18732	1.69195e-05	0.000104128	237	ENSG00000127561	+	SYNGR3	366.885	-0.810549
chr16	2008357	2009820	2009715	2009850	607	1.30709	1.50534e-34	6.37552e-33	5646	2008286	2008377	29	4.80405	1.29305e-21	3.12133e-20	222	ENSG00000167962	-	ZNF598	5893.36	0.950038
chr16	2205241	2205323	2205212	2205306	83	-1.93668	1.3253e-16	2.42711e-15	485	2205276	2205326	8	-0.329684	0.588117	0.746491	45	ENSG00000167965	+	MLST8	1432.76	-0.26964
chr16	2205453	2205684	2205444	2205522	1591	0.216284	0.0301979	0.0830695	3958	2205633	2205693	7	-0.994295	0.278864	0.458809	25	ENSG00000167965	+	MLST8	1432.76	-0.26964
chr16	2267915	2268113	2268045	2268120	8988	-0.0926806	0.356101	0.541807	16087	2267907	2267962	5	1.75302	0.0348069	0.0933781	25	ENSG00000205937	-	RNPS1	4522.55	-0.421706
chr16	2268219	2268356	2268236	2268418	68	0.187834	0.298883	0.481668	654	2268157	2268259	48	1.01891	3.20179e-08	2.90914e-07	548	ENSG00000205937	-	RNPS1	4522.55	-0.421706
chr16	2268481	2268759	2268454	2268658	218	0.697019	3.78427e-08	3.40544e-07	1695	2268714	2268763	6	0.175692	0.857881	0.925354	17	ENSG00000260778	+	ENSG00000260778	138.937	1.02658
chr16	2457711	2459977	2459901	2459992	36	-1.1812	0.0011037	0.0047094	183	2457711	2457763	38	-0.329807	0.463614	0.643812	94	ENSG00000260874	-	ENSG00000260874	21.9988	-0.220411
chr16	2673115	2673414	2673343	2673448	200	0.0274281	0.83513	0.912008	1902	2673106	2673184	9	-0.00425894	0.993391	0.996622	61	ENSG00000260565	-	ERVK13-1	660.308	0.400883
chr16	2752030	2752560	2752489	2752595	64	0.772982	2.48361e-05	0.000147939	577	2752025	2752078	8	0.12965	0.829209	0.908312	46	ENSG00000205913	-	SRRM2-AS1	263.005	0.986944
chr16	2752677	2752965	2752645	2752753	3780	0.485714	1.17297e-07	9.94369e-07	37937	2752917	2752973	18	-0.00264643	0.995162	0.997598	90	ENSG00000167978	+	SRRM2	30933.1	0.49518
chr16	2768737	2769202	2768738	2768786	45	0.465701	0.373749	0.559971	57	2769149	2769211	4	-0.0443271	0.954129	0.976553	33	ENSG00000167978	+	SRRM2	30933.1	0.49518
chr16	2771081	2771775	2770990	2771174	86	0.670379	0.000177855	0.000898897	664	2771729	2771778	8	0.441231	0.708478	0.833174	12	ENSG00000167978	+	SRRM2	30933.1	0.49518
chr16	2857734	2858169	2858120	2858174	1090	1.41747	1.28108e-26	3.92951e-25	1469	2857734	2857798	15	1.20204	0.0210873	0.0614979	64	ENSG00000005001	-	PRSS22	1422.66	1.3996
chr16	2912005	2912640	2911831	2912074	473	1.28043	6.06634e-39	2.97117e-37	4854	2912595	2912646	10	2.9316	0.0320714	0.0873702	13	ENSG00000059122	+	FLYWCH1	3934	1.46677
chr16	2964274	2965135	2964265	2964337	136	-2.38847	1.17064e-11	1.50328e-10	245	2965090	2965137	9	0.0329037	0.970272	0.984693	21	ENSG00000131650	+	KREMEN2	260.028	-2.77643
chr16	2969347	2970186	2969332	2969401	2254	-1.62505	2.3907e-46	1.46132e-44	4595	2970134	2970270	53	-1.54716	5.19522e-06	3.48613e-05	212	ENSG00000162073	+	PAQR4	2159.31	-1.82251
chr16	2979795	2980443	2980367	2980460	1176	-2.79246	4.47661e-137	1.63825e-134	11275	2979796	2979845	5	-0.595127	0.542361	0.712276	18	ENSG00000127564	-	PKMYT1	2938.79	-2.79711
chr16	3004912	3005108	3005055	3005114	6	0.621086	0.526053	0.698454	20	3004912	3004960	13	0.893839	0.173532	0.327767	41	ENSG00000262362	-	ENSG00000262362	11.429	0.177263
chr16	3020367	3020860	3020339	3020416	21511	0.486954	4.28252e-10	4.78176e-09	68379	3020814	3020887	11	0.944106	0.102988	0.22152	49	ENSG00000006327	+	TNFRSF12A	8911.38	0.481363
chr16	3024042	3024245	3024181	3024278	262	-1.24916	2.45863e-18	5.00103e-17	1306	3024037	3024206	249	-1.21426	1.3297e-21	3.20615e-20	2146	ENSG00000103145	-	HCFC1R1	530.127	-0.709873
chr16	3058522	3059350	3059289	3059385	116	-0.0653523	0.667283	0.805266	915	3058490	3058591	14	0.952594	0.00819996	0.0275076	125	ENSG00000261971	-	MMP25-AS1	379.513	-0.31435
chr16	3263799	3264487	3263781	3263867	13	0.713529	0.0632499	0.15123	108	3264414	3264515	18	0.477837	0.198514	0.361174	121	ENSG00000281005	+	LINC00921	30.9464	0.221907
chr16	3305496	3305918	3305470	3305560	1175	0.32863	0.00505824	0.0180881	2917	3305872	3305975	20	0.93886	0.0557788	0.137081	66	ENSG00000162086	+	ZNF75A	1394.56	0.231002
chr16	3443690	3444221	3443663	3443760	63	-0.044259	0.807873	0.895499	605	3444173	3444224	4	-0.153632	0.89835	0.947244	12	ENSG00000122390	+	NAA60	3773.93	0.248751
chr16	3880172	3880712	3880635	3880735	418	0.365019	0.00405892	0.0149373	2187	3880088	3880225	12	0.275149	0.581716	0.741852	63	ENSG00000005339	-	CREBBP	5493.2	0.307862
chr16	4115336	4116441	4116363	4116554	319	-0.261848	0.0678245	0.159829	1433	4115334	4115385	7	0.830839	0.334852	0.520791	21	ENSG00000162104	-	ADCY9	3067.05	-0.136054
chr16	4183411	4183957	4183815	4183972	86	0.175941	0.510474	0.685752	267	4183316	4183459	50	0.211676	0.361073	0.546706	335	ENSG00000263105	-	ENSG00000263105	19.3995	0.00241899
chr16	4271940	4272882	4272818	4273058	82	-2.99675	8.01463e-44	4.58407e-42	916	4271932	4272007	79	-0.475354	0.0362127	0.0964454	352	ENSG00000090447	-	TFAP4	485.977	-2.62013
chr16	4272353	4274058	4274018	4274080	5	-0.811481	0.264065	0.442146	36	4272341	4272406	5	-2.88501	0.00475657	0.0171377	32	ENSG00000090447	-	TFAP4	485.977	-2.62013
chr16	4316066	4317058	4316027	4316217	679	-0.37651	0.00160733	0.00658733	2405	4317009	4317061	7	1.18059	0.291201	0.472749	14	ENSG00000126603	+	GLIS2	1862.28	0.087889
chr16	4537433	4538772	4538720	4538796	1103	5.62207	3.22722e-131	1.05335e-128	1973	4537430	4537564	7	6.04695	1.31827e-07	1.11119e-06	36	ENSG00000089486	-	CDIP1	1123.91	6.17595
chr16	4693717	4694176	4693703	4693770	3939	-0.181864	0.0381153	0.10059	8318	4694099	4694206	45	-0.143762	0.570707	0.73359	270	ENSG00000168101	+	NUDT16L1	2423.77	-0.295723
chr16	4767379	4768693	4768621	4768725	16	-0.740755	0.0296288	0.08177	154	4767315	4767430	11	-0.659185	0.172447	0.326253	75	ENSG00000103199	-	ZNF500	512.618	-0.0814692
chr16	4795368	4796083	4795362	4795541	2165	0.0636262	0.441682	0.62405	14666	4796032	4796090	25	-1.58019	0.00501576	0.0179537	69	ENSG00000267795	+	SMIM22	1133.58	1.06789
chr16	4802406	4802632	4802571	4802670	1547	0.0910747	0.310654	0.495166	8412	4802279	4802463	47	1.63224	5.20074e-09	5.19619e-08	296	ENSG00000067836	-	ROGDI	1999.73	0.189349
chr16	4802817	4802859	4802813	4802911	858	0.700912	8.98345e-13	1.26465e-11	4945	4802812	4802872	4	1.20344	0.0787668	0.179924	38	ENSG00000067836	-	ROGDI	1999.73	0.189349
chr16	4846666	4847281	4847227	4847291	3261	0.251308	0.00598727	0.0209608	16252	4846652	4846714	166	2.06057	1.88861e-14	3.00105e-13	291	ENSG00000140632	-	GLYR1	5581.45	0.285307
chr16	5033595	5033934	5033826	5033942	44	0.108577	0.712557	0.836147	199	5033596	5033618	8	0.546413	0.550042	0.718266	19	ENSG00000103174	-	NAGPA	361.325	-0.223994
chr16	8962721	8963886	8963832	8964010	883	-0.223966	0.0976027	0.212576	5078	8962709	8962799	30	1.20023	0.00326398	0.0123373	109	ENSG00000187555	-	USP7	10072.6	0.192739
chr16	9091643	9092592	9091636	9091697	4732	0.141123	0.131008	0.265502	15605	9092544	9092593	8	0.369929	0.751898	0.861301	14	ENSG00000182831	+	C16orf72	3938.6	0.308641
chr16	10580338	10580597	10580545	10580700	6817	-0.376253	3.48192e-07	2.78106e-06	26288	10580336	10580384	7	-0.78382	0.344312	0.530015	26	ENSG00000213853	-	EMP2	16027.4	-0.399421
chr16	10743840	10744096	10743819	10743891	1192	-0.387258	4.72191e-05	0.000267882	4363	10744020	10744101	79	1.30849	8.60403e-13	1.21488e-11	569	ENSG00000103274	+	NUBP1	1468.13	-0.658455
chr16	11586136	11586918	11586879	11586956	3746	1.18528	5.07389e-31	1.89121e-29	10673	11586134	11586186	14	2.80279	8.99139e-06	5.79253e-05	56	ENSG00000189067	-	LITAF	10197.8	1.67259
chr16	11587082	11587397	11587347	11587432	212	2.16065	1.52525e-44	8.85569e-43	1107	11587010	11587083	10	0.719768	0.116906	0.244061	85	ENSG00000189067	-	LITAF	10197.8	1.67259
chr16	11796553	11797238	11797162	11797262	753	0.256418	0.00197381	0.00790607	6323	11796531	11796613	13	-0.42485	0.419651	0.604998	67	ENSG00000122299	-	ZC3H7A	3484.52	0.132142
chr16	11896715	11898035	11897990	11898040	18	0.342035	0.600157	0.75559	37	11896637	11896769	25	0.44833	0.27098	0.450015	107	ENSG00000103342	-	GSPT1	17013	0.307877
chr16	11915495	11915947	11915832	11916092	1958	0.201269	0.0170611	0.0515154	21283	11915480	11915574	17	3.2375	3.95236e-16	7.00014e-15	170	ENSG00000103342	-	GSPT1	17013	0.307877
chr16	11976753	11977717	11976714	11976805	386	1.25335	9.57328e-24	2.57407e-22	1508	11977682	11977807	14	2.47643	8.64367e-08	7.43792e-07	98	ENSG00000048471	+	SNX29	2239.9	1.60229
chr16	14302280	14302952	14302224	14302558	862	1.72344	1.08463e-85	1.64025e-83	5757	14302902	14302958	6	3.32104	0.00740282	0.0251929	17	ENSG00000262454	+	MIR193BHG	1075.71	1.59715
chr16	14632950	14634073	14632780	14633029	254	-0.186986	0.0888015	0.197478	2014	14634023	14634079	30	0.988914	0.104807	0.224553	45	ENSG00000103429	+	BFAR	1746.58	-0.462554
chr16	15650246	15650267	15650218	15650309	296	-0.430353	0.00137819	0.00574209	1434	15650244	15650271	12	1.2613	0.218155	0.386511	17	ENSG00000072864	+	NDE1	1465.78	-0.155834
chr16	18925963	18926128	18926068	18926291	49	-0.116957	0.640849	0.786356	278	18925945	18926029	59	-0.52781	0.0630978	0.150956	291	ENSG00000157106	-	SMG1	7684.15	-0.00581066
chr16	18926236	18926400	18926354	18926469	229	-0.0583004	0.728018	0.846072	757	18926226	18926277	4	0.377105	0.741413	0.854444	16	ENSG00000157106	-	SMG1	7684.15	-0.00581066
chr16	19067613	19067774	19067590	19067684	1294	0.298882	0.00387403	0.0143412	3930	19067772	19067916	12	1.13479	0.0155104	0.0475	86	ENSG00000167186	+	COQ7	774.018	0.21435
chr16	19521622	19522097	19521938	19522119	2738	-0.871376	7.25068e-23	1.86816e-21	7909	19521613	19521669	5	-0.864059	0.367426	0.553618	21	ENSG00000006007	-	GDE1	4185.2	-0.75548
chr16	19718282	19718466	19718266	19718353	200	-0.484738	0.000166399	0.000846319	1428	19718420	19718469	19	1.48947	0.0190702	0.0565556	47	ENSG00000174628	+	IQCK	319.428	-0.754316
chr16	20806526	20807235	20806506	20806665	703	-0.897436	2.28797e-13	3.36224e-12	2012	20807189	20807242	6	0.889954	0.352505	0.53804	17	ENSG00000005189	+	REXO5	577.728	-0.917596
chr16	20899906	20900357	20900286	20900379	482	-0.0175178	0.884847	0.94013	1885	20899880	20899959	7	-0.389992	0.581825	0.741891	35	ENSG00000196678	-	ERI2	1946.43	0.275117
chr16	20900799	20900806	20900764	20900944	295	0.0812543	0.443187	0.625364	2503	20900760	20900812	11	1.35868	0.0567264	0.138865	32	ENSG00000102897	+	LYRM1	835.49	0.198154
chr16	21300883	21301416	21300857	21300961	144	-0.936822	1.07421e-10	1.26847e-09	1286	21301369	21301424	7	-4.09455	0.000636602	0.00286803	29	ENSG00000189149	+	CRYM-AS1	39.4307	-1.39687
chr16	21501803	21502259	21502173	21502314	358	0.738649	4.61588e-11	5.62989e-10	2377	21501795	21501932	26	1.81832	3.85041e-06	2.63689e-05	135	ENSG00000180747	-	SMG1P3	223.434	0.0137936
chr16	22007781	22008067	22008020	22008068	10	0.694108	0.284316	0.464893	40	22007782	22007828	8	1.21185	0.312849	0.497779	11	ENSG00000275445	-	ENSG00000275445	6.09402	1.40273
chr16	22297433	22297880	22297400	22297487	879	0.0142578	0.862831	0.92771	7222	22297834	22297885	9	-1.098	0.258016	0.435457	23	ENSG00000058600	+	POLR3E	2710.58	0.0412017
chr16	22437005	22437214	22436984	22437134	60	0.329937	0.0950401	0.208305	490	22437071	22437215	16	-0.636379	0.0155453	0.0475919	273	ENSG00000237296	+	SMG1P1	344.868	-0.196337
chr16	22437312	22437460	22437198	22437358	81	0.0906656	0.645462	0.789714	512	22437316	22437474	44	0.346961	0.236923	0.40908	216	ENSG00000237296	+	SMG1P1	344.868	-0.196337
chr16	22437582	22437591	22437581	22437632	33	-0.5479	0.281013	0.461115	68	22437544	22437626	26	-0.0463234	0.920417	0.959848	78	ENSG00000237296	+	SMG1P1	344.868	-0.196337
chr16	23148832	23149430	23149359	23149490	140	-0.243551	0.102619	0.220877	1033	23148822	23148876	4	0.443414	0.603729	0.758111	22	ENSG00000103404	-	USP31	1121.35	-0.295086
chr16	23452781	23453164	23453103	23453195	472	-0.674862	1.73868e-11	2.19768e-10	3556	23452751	23452847	114	-0.457308	0.0100534	0.0327794	609	ENSG00000168434	-	COG7	1542.96	-0.632114
chr16	23557142	23557349	23557293	23557370	1605	-0.281702	0.000836572	0.00366541	6075	23557129	23557196	9	-0.551445	0.424671	0.609063	38	ENSG00000103356	-	EARS2	2534.89	-0.386299
chr16	23557726	23558274	23557612	23557772	6783	0.224473	0.0118917	0.0378607	21897	23558225	23558280	10	2.61479	0.00737406	0.0251111	22	ENSG00000103353	+	UBFD1	7457.55	0.201455
chr16	24729650	24730089	24729637	24729732	2318	0.0350597	0.70209	0.82918	12828	24730066	24730091	11	-0.67437	0.384882	0.571376	28	ENSG00000090905	+	TNRC6A	5088.07	0.0785282
chr16	25257589	25257832	25257771	25257937	56	-0.446884	0.0507048	0.126977	356	25257570	25257672	101	0.626285	0.00232221	0.00912563	567	ENSG00000155592	-	ZKSCAN2	394.046	-0.716976
chr16	27203525	27203699	27203493	27203580	51	-0.369452	0.135241	0.272034	315	27203684	27203743	9	0.66821	0.198255	0.360827	71	ENSG00000155666	+	KDM8	219.169	-0.423054
chr16	27313922	27314411	27313491	27313958	164	0.783666	5.65012e-13	8.09146e-12	2633	27314339	27314416	20	1.1548	0.0202099	0.0593692	69	ENSG00000077238	+	IL4R	1804.73	0.82895
chr16	28292524	28293364	28292500	28292673	1359	1.43686	2.30707e-57	1.87529e-55	10077	28293313	28293373	11	1.20932	0.0524137	0.130461	41	ENSG00000188322	+	SBK1	2641.89	1.37067
chr16	28491455	28492071	28491905	28492086	265	-0.31913	0.00912917	0.0301875	1920	28491426	28491506	12	-0.139769	0.815195	0.899807	49	ENSG00000261832	-	ENSG00000261832	0.768693	1.29738
chr16	28492120	28492273	28492222	28492296	26	1.42065	0.000920687	0.0039977	96	28492121	28492198	9	0.577295	0.424878	0.609198	34	ENSG00000188603	-	CLN3	68.7881	0.460321
chr16	28537417	28538973	28538803	28538988	1860	6.69423	1.97288e-206	1.96211e-203	4461	28537411	28537465	78	7.36177	2.83093e-12	3.8358e-11	152	ENSG00000176046	-	NUPR1	272.626	7.34513
chr16	28553971	28554189	28554107	28554204	1445	1.04785	8.37511e-21	1.94025e-19	2778	28553933	28554026	377	0.0670985	0.533771	0.705001	2814	ENSG00000275441	-	ENSG00000275441	98.0983	0.990283
chr16	28823027	28823965	28823012	28823314	307	-0.520883	4.82436e-08	4.28395e-07	6064	28823919	28824086	81	1.24353	1.17048e-09	1.25124e-08	472	ENSG00000168488	+	ATXN2L	10289.8	0.352498
chr16	28824124	28824285	28824053	28824272	38	0.248023	0.196595	0.358631	503	28824266	28824323	7	2.54279	0.000106227	0.000563785	49	ENSG00000168488	+	ATXN2L	10289.8	0.352498
chr16	28845599	28846334	28846271	28846355	7935	-0.331933	0.000597033	0.00270795	49912	28845595	28845650	23	0.54338	0.297953	0.480627	66	ENSG00000178952	-	TUFM	10248.7	-0.530617
chr16	28863546	28863761	28863514	28863619	75	0.482684	0.0632413	0.151218	245	28863686	28863767	27	0.525234	0.196377	0.358363	104	ENSG00000178188	+	SH2B1	2855.21	0.312116
chr16	28863847	28863928	28863820	28864041	243	0.373923	0.00142181	0.00589969	2424	28863876	28863950	26	0.199668	0.585434	0.744483	136	ENSG00000178188	+	SH2B1	2855.21	0.312116
chr16	28925012	28925229	28925133	28925246	416	0.343614	0.000176855	0.000894284	3789	28925006	28925174	19	1.68192	4.14983e-06	2.82729e-05	140	ENSG00000177548	-	RABEP2	2465.59	0.0283597
chr16	28925260	28925720	28925639	28925740	412	-0.232522	0.0873451	0.195024	1206	28925237	28925426	42	0.693109	0.00196446	0.00787274	388	ENSG00000177548	-	RABEP2	2465.59	0.0283597
chr16	28974125	28974670	28974126	28974169	9	-1.92259	0.16147	0.310907	12	28974603	28974684	23	0.439324	0.260873	0.438694	105	ENSG00000169682	+	SPNS1	70.487	0.671889
chr16	29790754	29791177	29790718	29790836	2391	-1.67144	2.54988e-103	5.25747e-101	16435	29791132	29791181	6	0.377396	0.66038	0.800382	22	ENSG00000079616	+	KIF22	6585	-1.75478
chr16	29804842	29805495	29805435	29805509	96	1.27638	1.60522e-05	9.91299e-05	214	29804688	29804921	828	-0.638053	2.7395e-08	2.50705e-07	4592	ENSG00000275857	-	ENSG00000275857	44.328	2.26238
chr16	29806528	29806729	29806354	29806687	5464	-0.910143	9.45954e-25	2.66913e-23	32784	29806675	29806763	15	-2.43498	7.39269e-06	4.83744e-05	98	ENSG00000103495	+	MAZ	20776.3	-0.980014
chr16	29806886	29807920	29806869	29806936	1150	-2.75473	2.6118e-108	6.03255e-106	3916	29807768	29807957	43	1.32061	4.7823e-10	5.31244e-09	425	ENSG00000103495	+	MAZ	20776.3	-0.980014
chr16	29808130	29810160	29808084	29808183	1090	-0.542711	4.31072e-09	4.34547e-08	7757	29810113	29810164	5	-2.86092	0.041046	0.106883	13	ENSG00000103495	+	MAZ	20776.3	-0.980014
chr16	29811460	29811981	29811931	29811988	14	0.14295	0.839929	0.915121	33	29811430	29811506	5	-0.35202	0.554736	0.72173	48	ENSG00000238045	-	ENSG00000238045	150.346	-0.664211
chr16	29816183	29816783	29816073	29816251	668	-1.34625	2.75369e-40	1.40741e-38	7775	29816708	29816804	8	-1.06119	0.0635345	0.151784	60	ENSG00000280789	+	PAGR1	1961.34	-1.43481
chr16	29819721	29821236	29819635	29819949	283	-2.14284	2.13808e-23	5.64473e-22	783	29821191	29821241	8	1.62437	0.0617108	0.14836	24	ENSG00000013364	+	MVP	1874.13	0.871807
chr16	29862677	29863220	29863065	29863299	4378	-0.280931	0.000270111	0.00131541	22294	29862673	29862729	7	0.282898	0.690166	0.820936	33	ENSG00000103502	-	CDIPT	6037.54	-0.132383
chr16	29900374	29900930	29900347	29900654	190	-2.11757	4.27423e-57	3.4314e-55	2056	29900878	29900937	2	-1.32744	0.295245	0.477479	13	ENSG00000174939	+	ASPHD1	350.803	-2.00157
chr16	29995379	29995611	29995559	29995649	1769	-2.77417	2.72446e-153	1.26547e-150	5144	29995333	29995426	147	-1.29389	2.42314e-13	3.55753e-12	786	ENSG00000149929	-	HIRIP3	2367.03	-1.89499
chr16	29995689	29996090	29996024	29996113	152	-0.914002	6.08323e-09	6.03016e-08	1055	29995683	29995765	21	-1.462	3.47944e-05	0.000202087	175	ENSG00000149929	-	HIRIP3	2367.03	-1.89499
chr16	30064183	30065044	30064148	30064322	566	-0.985616	4.87998e-15	8.06991e-14	3834	30064986	30065152	61	0.348798	0.089856	0.199236	405	ENSG00000149925	+	ALDOA	15692.1	0.759518
chr16	30064742	30065560	30064645	30064789	229	-0.979153	4.70461e-06	3.17837e-05	559	30065243	30065603	90	1.39384	2.04852e-33	8.28581e-32	1813	ENSG00000149925	+	ALDOA	15692.1	0.759518
chr16	30065759	30067278	30065746	30065920	48488	0.436059	1.52041e-08	1.43208e-07	268690	30067226	30067303	13	0.178951	0.65633	0.797418	102	ENSG00000149925	+	ALDOA	15692.1	0.759518
chr16	30067299	30067497	30067252	30067369	40	-0.124054	0.613767	0.765825	382	30067447	30067516	13	0.777378	0.0634214	0.151566	95	ENSG00000149925	+	ALDOA	15692.1	0.759518
chr16	30067610	30067626	30067444	30067613	423	-0.0109009	0.968357	0.98396	2503	30067579	30067633	27	1.83408	0.00206804	0.00824	52	ENSG00000149925	+	ALDOA	15692.1	0.759518
chr16	30068656	30070182	30068640	30068706	261	-0.0185135	0.928117	0.963418	488	30070118	30070183	12	0.803037	0.274182	0.453568	33	ENSG00000149925	+	ALDOA	15692.1	0.759518
chr16	30076002	30076463	30075972	30076077	11500	-0.0130972	0.880294	0.937791	55407	30076392	30076471	32	3.50597	1.77244e-22	4.46603e-21	248	ENSG00000149923	+	PPP4C	15696	0.112481
chr16	30090205	30091886	30091848	30091936	107	-0.188987	0.332027	0.517849	622	30090201	30090253	8	2.67144	0.00614375	0.0214287	23	ENSG00000149922	-	TBX6	226.434	-0.524958
chr16	30115613	30116982	30116936	30117003	22	-0.206149	0.687551	0.819347	73	30115614	30115666	5	0.129263	0.886402	0.940905	22	ENSG00000102882	-	MAPK3	6947.29	-0.436424
chr16	30121589	30123212	30123066	30123249	2315	-0.367019	3.44261e-06	2.37494e-05	22032	30121585	30121638	11	4.12252	0.000339822	0.00162044	28	ENSG00000102882	-	MAPK3	6947.29	-0.436424
chr16	30183013	30183505	30182944	30183062	11	-0.826885	0.107014	0.228123	70	30183430	30183511	15	-1.4639	0.00508543	0.0181661	80	ENSG00000102879	+	CORO1A	2184.46	-0.373732
chr16	30183605	30184546	30183599	30183679	398	-0.34341	0.00300562	0.0114746	1829	30184501	30184549	7	0.0124757	0.989871	0.994743	16	ENSG00000102879	+	CORO1A	2184.46	-0.373732
chr16	30335222	30335365	30335289	30335455	120	0.186652	0.234412	0.406155	767	30335218	30335270	6	2.62167	0.000152584	0.000782695	45	ENSG00000183604	-	SMG1P5	329.825	-0.0553048
chr16	30354664	30355305	30355228	30355324	1788	0.272265	0.00162986	0.00666932	13528	30354664	30354713	15	2.69887	0.00648031	0.0224575	23	ENSG00000169217	-	CD2BP2	8496.88	0.148875
chr16	30355433	30355850	30355421	30355549	119	-0.071753	0.772273	0.874429	309	30355788	30355857	33	-0.382317	0.408186	0.594642	82	ENSG00000260219	+	CD2BP2-DT	153.372	-0.731887
chr16	30377641	30377811	30377536	30377707	17	-0.894305	0.0143502	0.0444891	157	30377755	30377823	4	-2.20083	0.00232342	0.00912912	50	ENSG00000180209	+	MYLPF	4.75741	1.36874
chr16	30377876	30378241	30377863	30378037	24	-0.621245	0.0369407	0.098023	228	30378169	30378261	30	-0.438246	0.199102	0.3619	154	ENSG00000180035	+	ZNF48	1420.05	-0.836577
chr16	30395110	30395372	30395095	30395161	3	-0.608934	0.494866	0.672132	21	30395323	30395423	27	-0.685979	0.0538081	0.133198	156	ENSG00000180035	+	ZNF48	1420.05	-0.836577
chr16	30407295	30407494	30407278	30407362	55	-0.766557	0.0109741	0.0353116	217	30407426	30407520	12	0.343408	0.550749	0.718778	47	ENSG00000179965	+	ZNF771	670.324	-0.246037
chr16	30429400	30430016	30429942	30430052	1748	-1.66368	6.91024e-60	5.99143e-58	20522	30429399	30429449	11	-0.847424	0.159184	0.307709	51	ENSG00000179958	-	DCTPP1	5366.65	-1.73853
chr16	30526896	30527290	30526891	30526950	18	-0.504475	0.38379	0.570235	54	30527252	30527338	1297	0.0202663	0.822352	0.904174	8967	ENSG00000278922	+	ENSG00000278922	22.0018	-0.487101
chr16	30534644	30534969	30534526	30534975	60	-0.165668	0.294758	0.476967	761	30534639	30534697	3	0.422286	0.567503	0.731151	30	ENSG00000169955	-	ZNF747	152.738	-0.156292
chr16	30535057	30535319	30535027	30535130	198	-0.226502	0.0868653	0.194178	1254	30535274	30535322	17	-1.50835	0.120103	0.249039	24	ENSG00000235560	+	ENSG00000235560	125.535	-0.408999
chr16	30571073	30571711	30571520	30571729	617	-0.860432	1.22765e-19	2.68722e-18	4107	30571068	30571120	5	-2.0285	0.143858	0.285086	13	ENSG00000229809	-	ZNF688	694.213	-0.930391
chr16	30572038	30572167	30572033	30572088	10	-0.948396	0.163171	0.313269	39	30572120	30572178	3	-0.691507	0.527272	0.699433	16	ENSG00000239791	+	ENSG00000239791	36.7284	-2.18308
chr16	30572240	30572397	30572207	30572293	136	-2.89819	1.98838e-18	4.06112e-17	338	30572348	30572403	12	-0.921632	0.163244	0.313344	42	ENSG00000239791	+	ENSG00000239791	36.7284	-2.18308
chr16	30585252	30585538	30585493	30585792	69	-0.237193	0.0398379	0.104355	2095	30585251	30585301	21	0.0445424	0.939206	0.969079	48	ENSG00000197162	-	ZNF785	937.724	0.0645882
chr16	30650777	30651408	30650738	30651030	889	-0.180208	0.0427802	0.110524	4031	30651357	30651409	10	-1.50002	0.0124591	0.0394148	58	ENSG00000156858	+	PRR14	2506.87	-0.18729
chr16	30658490	30658594	30658397	30658584	1007	1.18853	4.12962e-46	2.51514e-44	9442	30658545	30658598	20	1.57863	0.00926309	0.0305682	46	ENSG00000156860	+	FBRS	10091.9	0.708818
chr16	30698195	30698470	30698159	30698280	1218	1.679	5.32366e-75	6.70702e-73	6599	30698320	30698511	207	2.18008	5.8423e-50	3.95424e-48	1073	ENSG00000080603	+	SRCAP	865.116	0.820757
chr16	30698638	30699001	30698933	30699075	150	1.8788	2.75124e-33	1.10646e-31	860	30698607	30698693	189	-1.38365	4.26694e-26	1.27957e-24	1796	ENSG00000261840	-	ENSG00000261840	175.179	1.41598
chr16	30699170	30699450	30699150	30699238	65	-2.54299	7.25103e-09	7.11931e-08	156	30699400	30699455	4	3.15127	0.00364637	0.0135907	23	ENSG00000080603	+	SRCAP	865.116	0.820757
chr16	30761600	30762061	30762011	30762095	240	-1.31216	1.08318e-13	1.6331e-12	824	30761552	30761612	9	-2.36644	6.84066e-05	0.0003771	84	ENSG00000196118	-	CCDC189	496.302	-0.87262
chr16	30786550	30787187	30787136	30787222	659	-0.547109	1.62755e-08	1.52857e-07	3197	30786551	30786610	5	-0.0580973	0.944283	0.971658	27	ENSG00000102870	-	ZNF629	2834.42	-0.532203
chr16	30922844	30923272	30923098	30923293	32	0.805306	0.000566225	0.00258263	311	30922807	30922961	44	-0.449954	0.0168612	0.0509902	523	ENSG00000260852	-	FBXL19-AS1	546.869	0.79121
chr16	30923221	30923419	30923370	30923423	5	0.471095	0.5514	0.719228	26	30923221	30923268	10	-0.754921	0.518026	0.692197	13	ENSG00000260852	-	FBXL19-AS1	546.869	0.79121
chr16	30949067	30950162	30949060	30949155	676	1.68336	1.04656e-52	7.6269e-51	3437	30950115	30950166	11	2.30059	0.0140626	0.0437396	24	ENSG00000175938	+	ORAI3	631.063	1.31408
chr16	30957969	30958344	30957956	30958052	1486	-0.0767854	0.476774	0.655935	5305	30958325	30958409	20	1.26077	0.000169443	0.000860197	182	ENSG00000099381	+	SETD1A	3179.87	0.0532523
chr16	31033557	31034051	31033528	31033628	4145	-0.207151	0.0120848	0.0383975	23610	31034006	31034052	24	0.773	0.262629	0.440605	35	ENSG00000103496	+	STX4	2961.03	-0.178438
chr16	31072719	31073248	31073176	31073276	9	-1.33477	0.0207682	0.060718	69	31072672	31072765	21	0.72702	0.0163888	0.0497573	192	ENSG00000167394	-	ZNF668	1030.47	-0.301559
chr16	31073545	31073751	31073670	31073768	275	-0.30581	0.0116658	0.0372214	1666	31073544	31073595	4	0.895649	0.237353	0.409602	31	ENSG00000167394	-	ZNF668	1030.47	-0.301559
chr16	31073836	31074185	31074137	31074228	81	-0.706595	0.000214997	0.00106845	563	31073794	31073885	50	-0.0245022	0.909511	0.9535	373	ENSG00000167394	-	ZNF668	1030.47	-0.301559
chr16	31117663	31117893	31117649	31117720	4089	0.284767	0.00569377	0.020057	8178	31117832	31117920	63	1.04452	3.33536e-06	2.30678e-05	366	ENSG00000103510	+	KAT8	2042.95	0.129874
chr16	31180138	31180619	31180134	31180190	13795	-1.15315	1.03273e-60	9.13206e-59	18144	31180570	31180622	13	-1.35184	0.0301019	0.0828594	52	ENSG00000089280	+	FUS	15988.2	-1.061
chr16	31184334	31185077	31184230	31184441	72	-0.961746	0.00229397	0.00903101	205	31185026	31185085	6	-1.1754	0.185259	0.343225	24	ENSG00000089280	+	FUS	15988.2	-1.061
chr16	31189737	31190346	31189732	31189791	87	-1.46574	0.000191734	0.000962494	140	31190300	31190351	3	-0.711029	0.56679	0.73051	13	ENSG00000089280	+	FUS	15988.2	-1.061
chr16	31202092	31202759	31202678	31202775	1288	-0.340586	5.66385e-05	0.000316666	9361	31202069	31202160	16	1.56372	0.000213565	0.00106181	100	ENSG00000103490	-	PYCARD	1009.32	-0.450522
chr16	31458310	31459103	31458300	31458358	23	0.109043	0.805288	0.894007	85	31459025	31459133	169	0.981651	1.42553e-09	1.51335e-08	772	ENSG00000140691	+	ARMC5	1191.2	0.402798
chr16	31459509	31459732	31459483	31459556	131	0.635138	8.38625e-05	0.000453809	729	31459631	31459805	61	2.0253	5.55649e-27	1.72819e-25	618	ENSG00000140691	+	ARMC5	1191.2	0.402798
chr16	35170123	35170412	35170364	35170416	15	-1.561	0.0945901	0.207512	25	35170118	35170177	5	0.298697	0.761855	0.867566	17	ENSG00000261461	-	UBE2MP1	2224.28	-0.535561
chr16	46689312	46689519	46689472	46689529	11	-1.92988	0.0158746	0.0484493	36	46689307	46689363	3	-0.229534	0.810764	0.897282	18	ENSG00000069329	-	VPS35	3724.66	-0.389064
chr16	46972991	46973670	46973586	46973708	2275	0.112073	0.222123	0.391188	7591	46972992	46973038	17	1.57433	0.046818	0.119032	30	ENSG00000069345	-	DNAJA2	2309.98	0.101978
chr16	48609129	48610156	48610115	48610221	261	0.338525	0.0036595	0.0136354	1923	48609117	48609176	14	6.45691	5.71629e-09	5.68374e-08	49	ENSG00000102921	-	N4BP1	1381.87	0.581667
chr16	49855732	49856110	49856044	49856113	13	3.09689	1.14922e-07	9.7531e-07	74	49855634	49855811	55	3.97063	1.76421e-31	6.68185e-30	320	ENSG00000102935	-	ZNF423	178.32	3.99007
chr16	53131011	53131091	53130903	53131089	107	0.41725	0.0465907	0.11857	426	53131068	53131093	7	0.375388	0.749148	0.859578	12	ENSG00000177200	+	CHD9	1504.88	0.004509
chr16	54285601	54286204	54286153	54286399	159	-1.54033	2.6164e-14	4.11498e-13	783	54285587	54285655	18	-2.13452	0.000649341	0.0029192	74	ENSG00000177508	-	IRX3	295.689	-1.66367
chr16	54286200	54286723	54286598	54286812	68	-1.91348	1.41971e-15	2.43491e-14	467	54286200	54286223	9	0.458881	0.641937	0.787103	16	ENSG00000177508	-	IRX3	295.689	-1.66367
chr16	54928489	54928857	54928725	54928898	231	-1.56486	8.99347e-31	3.30266e-29	1944	54928485	54928537	11	-0.361061	0.536984	0.707697	51	ENSG00000245694	-	CRNDE	929.144	0.468737
chr16	54930994	54933148	54930701	54931046	413	0.540791	1.16952e-05	7.39964e-05	1923	54933103	54933153	8	2.95541	0.0237781	0.0681046	14	ENSG00000176842	+	IRX5	1223.87	0.670002
chr16	57619737	57619986	57619718	57619802	261	-0.717416	5.94785e-08	5.22451e-07	1495	57619940	57619990	10	-0.209353	0.816555	0.900799	20	ENSG00000205336	+	ADGRG1	4243.38	0.515319
chr16	57620045	57620561	57620038	57620119	2505	0.925786	2.37074e-21	5.6375e-20	5858	57620487	57620565	11	0.0958355	0.876968	0.935873	43	ENSG00000205336	+	ADGRG1	4243.38	0.515319
chr16	57735780	57736668	57735744	57735850	372	-0.361661	0.00211774	0.00841323	2143	57736621	57736673	4	-0.56313	0.47648	0.655647	30	ENSG00000140854	+	KATNB1	573.543	-0.747962
chr16	58392481	58392825	58392455	58392620	147	-2.33054	2.48933e-33	1.00352e-31	818	58392745	58392830	84	-0.977598	0.000152203	0.000780882	310	ENSG00000181938	+	GINS3	404.152	-2.50887
chr16	58515516	58516088	58515490	58515579	84	-0.943228	9.6005e-07	7.1962e-06	562	58516023	58516114	113	-1.07997	2.89309e-07	2.33435e-06	528	ENSG00000103037	+	SETD6	495.921	-0.844412
chr16	58733930	58734315	58734236	58734316	2852	0.685741	6.5043e-22	1.59146e-20	16924	58733876	58733933	3	0.651672	0.336991	0.522866	37	ENSG00000125166	-	GOT2	4934.61	0.504731
chr16	66604734	66605642	66604720	66604797	22	0.749436	0.0293313	0.0810841	136	66605622	66605645	19	-0.095983	0.89845	0.947256	29	ENSG00000140931	+	CMTM3	55.6575	0.291474
chr16	66934487	66935352	66934410	66934553	270	2.05741	3.48372e-54	2.61545e-52	2117	66935338	66935404	32	5.46092	7.58687e-10	8.27032e-09	103	ENSG00000172831	+	CES2	3305.04	2.50686
chr16	67000538	67001043	67000517	67000621	74	0.511913	0.0238712	0.0683296	350	67000997	67001048	29	0.703415	0.154315	0.300448	65	ENSG00000172824	+	CES4A	315.455	0.722168
chr16	67159443	67159886	67159835	67159915	340	0.211046	0.0742535	0.171745	2442	67159431	67159491	32	0.68616	0.129854	0.263784	77	ENSG00000102871	-	TRADD	1451.39	0.0318852
chr16	67159958	67160941	67159925	67160040	335	-0.562938	6.58698e-07	5.05618e-06	1945	67160924	67160999	20	-0.330923	0.397966	0.584659	116	ENSG00000135722	+	FBXL8	573.499	-0.659094
chr16	67173956	67174432	67173918	67174008	369	-1.03799	9.27164e-19	1.92814e-17	2595	67174387	67174449	5	0.540382	0.471279	0.650809	32	ENSG00000140939	+	NOL3	1678.44	-0.545187
chr16	67178240	67180648	67180602	67180649	13	-1.29186	0.294876	0.477092	13	67178237	67178290	19	-0.197094	0.724368	0.843669	53	ENSG00000196123	-	KIAA0895L	767.482	-0.643598
chr16	67183747	67183962	67183909	67183997	665	-0.30508	0.00705128	0.0241732	2244	67183731	67183820	53	0.484348	0.0720298	0.16762	232	ENSG00000196123	-	KIAA0895L	767.482	-0.643598
chr16	67246901	67247480	67247419	67247521	141	-0.732178	0.000133822	0.000694973	651	67246900	67246974	32	0.0946487	0.849732	0.920829	72	ENSG00000135723	-	FHOD1	1096.16	-0.751651
chr16	67279184	67279410	67279180	67279234	7	-1.25055	0.127605	0.260346	29	67279217	67279433	73	0.0814196	0.712753	0.83625	386	ENSG00000196155	+	PLEKHG4	249.909	-0.65269
chr16	67562555	67563379	67562451	67562638	2447	-0.711023	5.99017e-14	9.1903e-13	18558	67563300	67563488	43	1.17788	2.44705e-07	1.99285e-06	355	ENSG00000102974	+	CTCF	4849.95	-0.556701
chr16	67846881	67847692	67846868	67846966	7070	0.45962	4.65724e-08	4.14251e-07	22146	67847642	67847779	113	2.16495	1.27964e-16	2.34858e-15	295	ENSG00000102898	+	NUTF2	3727.42	0.19255
chr16	67935941	67936849	67936780	67936866	306	0.605288	0.000108825	0.000576392	822	67935865	67936025	79	0.254346	0.180449	0.336801	513	ENSG00000205220	-	PSMB10	193.132	0.678724
chr16	68234774	68235631	68235586	68235634	10	0.855472	0.471252	0.650793	12	68234757	68234825	31	0.738206	0.0442504	0.113683	140	ENSG00000103067	-	ESRP2	6295.53	0.0602988
chr16	68235675	68236121	68236048	68236155	1143	0.050902	0.538825	0.709212	7095	68235644	68235691	5	1.32861	0.0879283	0.196044	26	ENSG00000103067	-	ESRP2	6295.53	0.0602988
chr16	68264527	68265300	68264498	68264705	202	0.304378	0.0140303	0.0436567	1695	68265255	68265304	12	1.6009	0.0906199	0.200593	20	ENSG00000103064	+	SLC7A6	2395.48	0.328317
chr16	68645336	68645751	68645294	68645388	796	1.27809	1.2368e-44	7.18586e-43	6135	68645705	68645766	6	1.13347	0.144235	0.285693	27	ENSG00000062038	+	CDH3	3646.79	1.30958
chr16	68645648	68646193	68645564	68645724	48	1.87246	2.39623e-12	3.26722e-11	265	68646144	68646196	4	-0.157454	0.801024	0.891813	42	ENSG00000062038	+	CDH3	3646.79	1.30958
chr16	69132351	69132569	69132516	69132593	4071	0.42482	3.31485e-06	2.29335e-05	18805	69132349	69132404	3	0.108243	0.914279	0.956225	16	ENSG00000168802	-	CHTF8	120.67	0.327405
chr16	69311355	69312066	69311262	69311427	8705	0.437653	6.19202e-06	4.10419e-05	32733	69312017	69312070	11	0.434005	0.519992	0.693707	37	ENSG00000132612	+	VPS4A	2291.37	0.320941
chr16	69330167	69330587	69330433	69330698	845	-0.477786	7.87902e-07	5.97418e-06	5767	69330164	69330238	30	0.00538575	0.988096	0.993774	138	ENSG00000258429	-	PDF	700.111	-0.566709
chr16	69339293	69339563	69339502	69339581	2536	-0.169655	0.0499114	0.125388	8814	69339287	69339344	13	1.67544	0.00453174	0.0164355	52	ENSG00000213380	-	COG8	1371.12	-0.172079
chr16	69566004	69566350	69565931	69566053	1163	1.22257	1.86445e-20	4.25063e-19	2381	69566279	69566353	18	2.8218	1.26509e-06	9.32962e-06	69	ENSG00000102908	+	NFAT5	2154.49	1.14699
chr16	70288206	70289505	70289435	70289535	1966	-0.620066	6.14347e-14	9.41353e-13	10761	70288201	70288285	11	-2.77771	0.000172355	0.000873695	61	ENSG00000090861	-	AARS1	9805.98	-0.730361
chr16	70523296	70523553	70523489	70523567	1741	0.156929	0.121836	0.251753	9779	70523295	70523345	4	-3.69771	0.00275968	0.0106434	22	ENSG00000103051	-	COG4	4483.37	-0.0215896
chr16	71484380	71484606	71484554	71484626	28	-0.383179	0.42036	0.605562	84	71484372	71484428	3	0.811949	0.399473	0.586374	19	ENSG00000261611	-	ENSG00000261611	0.9229	1.60919
chr16	71723357	71723884	71723831	71723985	744	-0.569538	7.89184e-07	5.98336e-06	2644	71723166	71723424	34	1.26647	6.00534e-09	5.95504e-08	393	ENSG00000040199	-	PHLPP2	1641.26	-0.379475
chr16	71808459	71809058	71809005	71809087	1582	0.504509	1.55495e-09	1.64352e-08	6770	71808439	71808521	6	0.672291	0.18454	0.342254	66	ENSG00000166747	-	AP1G1	9742.86	0.166934
chr16	71883604	71884160	71884070	71884178	75	-0.36329	0.0328712	0.0891608	742	71883602	71883652	11	-0.586042	0.413202	0.599283	33	ENSG00000102984	-	ZNF821	337.136	-0.0876612
chr16	71894419	71895390	71895235	71895406	45	0.999782	3.16839e-05	0.000185205	334	71894416	71894508	6	-2.12236	0.00818749	0.027469	40	ENSG00000102984	-	ZNF821	337.136	-0.0876612
chr16	71895530	71896179	71895356	71895585	975	0.461	4.87855e-06	3.28721e-05	4696	71896128	71896198	29	1.06511	0.0071173	0.0243679	108	ENSG00000182149	+	IST1	4328.74	0.465088
chr16	72093923	72094442	72093813	72094041	950	-0.0731611	0.443097	0.625323	4983	72094327	72094446	9	-0.499002	0.40369	0.590502	46	ENSG00000140829	+	DHX38	5720.28	-0.156374
chr16	73047577	73048094	73047950	73048133	181	-0.272656	0.106439	0.227243	677	73047498	73047843	77	1.00669	6.61212e-06	4.36416e-05	364	ENSG00000140836	-	ZFHX3	2510.12	0.115993
chr16	73059132	73059327	73059243	73059350	5	-1.47251	0.00722311	0.0246772	80	73059127	73059180	7	-0.0204814	0.981981	0.9905	19	ENSG00000140836	-	ZFHX3	2510.12	0.115993
chr16	74296813	74297484	74296796	74296886	9224	0.19938	0.0184114	0.0549101	55708	74297436	74297506	22	0.727471	0.0395378	0.103711	126	ENSG00000103035	+	PSMD7	8101.85	0.125006
chr16	74999059	74999840	74999030	74999114	1604	0.525509	7.69549e-10	8.37469e-09	16668	74999789	74999847	3	-0.687374	0.417113	0.602928	25	ENSG00000186187	+	ZNRF1	7798.68	0.527976
chr16	74999513	75000627	75000580	75000633	5	0.243289	0.804368	0.893564	17	74999510	74999562	293	0.308118	0.110849	0.234298	522	ENSG00000103091	-	WDR59	3476.1	0.826818
chr16	75148523	75148953	75148506	75148597	309	-1.17408	5.37845e-19	1.13413e-17	1811	75148778	75148965	68	0.144926	0.586872	0.745638	250	ENSG00000184517	+	ZFP1	873.473	-0.992352
chr16	75266135	75268006	75267933	75268012	38	0.243676	0.471623	0.651126	145	75266017	75266185	11	-0.151288	0.743667	0.855824	80	ENSG00000050820	-	BCAR1	6843.71	0.413399
chr16	75433255	75433469	75433421	75433508	8242	-0.0436627	0.66039	0.800383	24569	75433256	75433316	4	1.32245	0.0358299	0.0956128	43	ENSG00000153774	-	CFDP1	2364.7	-0.12549
[truncated: 3,457 more rows]

## Sheet: SuperPromoters_extended_RPE1
chr	super-Promoter_start	super-Promoter_end	peak#1_start	peak#1_end	hostTSS	peak#1_l2fc	peak#1_pval	peak#1_adj_pval	peak#1_readcount	peak#2_start	peak#2_end	daTSS	peak#2_l2fc	peak#2_pval	peak#2_adj_pval	peak#2_readcount	host_gene	orientation	hgnc	host_gene_baseMean	host_gene_lfc
chr1	826834	827505	826814	826923	5	0.553109	0.449696	0.744787	41	827351	827517	18	0.0139103	0.972795	0.991638	141	ENSG00000228794	+	LINC01128	405.104	-0.369493
chr1	924044	925603	924043	924138	6	-1.67867	0.0455634	0.188309	37	925518	925655	9	-0.544429	0.371633	0.684119	55	ENSG00000187634	+	SAMD11	574.138	-0.250496
chr1	960596	960805	960547	960723	75	-0.345433	0.0688013	0.251417	924	960717	960810	11	1.40697	0.118944	0.361434	27	ENSG00000187961	+	KLHL17	333.215	-0.0689538
chr1	966481	966977	966456	966613	122	0.457741	0.00939228	0.0561155	936	966870	966996	35	-0.0852693	0.837022	0.947468	123	ENSG00000187583	+	PLEKHN1	85.9591	1.44983
chr1	999375	1000094	999965	1000141	1273	-1.3777	1.30552e-37	1.78141e-35	7169	999306	999419	3	-1.11931	0.297655	NA	19	ENSG00000188290	-	HES4	1.95802	-0.628285
chr1	1000798	1001974	1000752	1001208	32	-0.8505	0.00217476	0.0168424	310	1001851	1001984	6	-1.74094	0.018661	0.0964333	47	ENSG00000187608	+	ISG15	512.94	0.482713
chr1	1020119	1021235	1020090	1020216	22689	0.82273	5.44314e-16	2.89846e-14	53346	1021146	1021236	6	0.687062	0.411266	0.716682	27	ENSG00000188157	+	AGRN	26261.3	0.911091
chr1	1348602	1349379	1349285	1349453	1267	-0.454135	0.0758272	0.268616	6808	1348573	1348725	24	0.0230876	0.956721	0.98697	123	ENSG00000107404	-	DVL1	3389.66	-0.0782996
chr1	1354797	1355581	1355495	1355617	71	0.748009	0.049238	0.19887	193	1354768	1354891	6	0.273325	0.680865	0.883389	50	ENSG00000162576	-	MXRA8	55.8911	0.179855
chr1	1358753	1360614	1360523	1360619	6	-0.46049	0.639215	0.862508	23	1358742	1358862	8	1.11574	0.0454032	0.187868	67	ENSG00000162576	-	MXRA8	55.8911	0.179855
chr1	1374051	1375181	1375054	1375360	1986	-0.319095	0.00552139	0.0364652	20076	1374048	1374148	47	-0.495027	0.564459	0.821271	135	ENSG00000175756	-	AURKAIP1	2262.68	-0.545053
chr1	1471777	1472131	1471751	1471895	408	-1.20446	1.60148e-20	1.14126e-18	3493	1472102	1472137	5	-0.118527	0.906758	0.971828	22	ENSG00000160072	+	ATAD3B	874.091	-0.575593
chr1	1615459	1615796	1615430	1615587	97	0.104824	0.534701	0.803357	1005	1615647	1615817	56	0.0209777	0.949686	0.984917	219	ENSG00000197530	+	MIB2	560.996	1.30925
chr1	1615864	1616170	1615848	1615998	339	0.864489	1.31101e-11	4.6301e-10	2515	1616086	1616182	16	1.03348	0.136979	0.395366	41	ENSG00000197530	+	MIB2	560.996	1.30925
chr1	1692532	1692794	1692703	1692834	208	0.391458	0.0355516	0.157005	817	1692525	1692621	7	1.60641	0.128532	0.379631	22	ENSG00000189339	-	SLC35E2B	678.317	0.363323
chr1	1724497	1724530	1724460	1724589	8	0.602907	0.326082	0.641805	52	1724421	1724576	18	0.388334	0.255583	0.566479	180	ENSG00000227775	+	ENSG00000227775	1.59845	-1.93022
chr1	1889961	1891086	1890943	1891124	17795	-0.365245	0.222909	0.525936	116944	1889950	1890086	7	-0.300471	0.640387	0.863255	58	ENSG00000078369	-	GNB1	7675.07	-0.138166
chr1	2391191	2391553	2391457	2391719	582	-0.177363	0.213252	0.512095	1719	2391125	2391233	14	-0.501369	0.322686	0.638346	83	ENSG00000116151	-	MORN1	197.176	0.284212
chr1	2546399	2546966	2546370	2546521	169	0.811487	0.00152179	0.012445	344	2546870	2547002	12	-0.00638508	0.988753	0.99679	105	ENSG00000272449	+	ENSG00000272449	37.9095	0.827549
chr1	2556370	2556995	2556360	2556654	318	1.7374	1.99758e-35	2.58384e-33	1963	2556909	2557022	7	1.27285	0.0280368	0.131826	71	ENSG00000157873	+	TNFRSF14	59.4565	4.68506
chr1	3069202	3070528	3069136	3069293	137	0.0257301	0.904886	0.971012	580	3070413	3070536	9	-0.210595	0.722697	0.901925	68	ENSG00000142611	+	PRDM16	87.8049	-0.221712
chr1	3900405	3901338	3900395	3900537	20	0.575624	0.332157	0.646921	57	3901202	3901341	7	-3.00613	0.000355777	0.00351707	55	ENSG00000236423	+	LINC01134	27.2962	0.461921
chr1	6393534	6393766	6393672	6393774	504	-0.532364	0.00799304	0.0493212	883	6393509	6393655	26	-0.101221	0.79886	0.933098	139	ENSG00000097021	-	ACOT7	2048.37	-0.363375
chr1	6490097	6490579	6490445	6490605	55	0.471004	0.13059	0.383509	235	6490091	6490191	18	-0.773497	0.308265	0.623814	41	ENSG00000171680	-	PLEKHG5	598.434	1.35832
chr1	6490649	6491666	6491583	6491727	8	0.600778	0.211682	0.510066	90	6490607	6490792	16	-0.597048	0.188588	0.478187	109	ENSG00000171680	-	PLEKHG5	598.434	1.35832
chr1	6613754	6614705	6613727	6613878	196	-0.347334	0.0528367	0.209126	1280	6614500	6614770	8	0.811724	0.105432	0.334566	88	ENSG00000116273	+	PHF13	1277.8	-0.543851
chr1	8423457	8424267	8423981	8424431	1059	-0.504499	5.0516e-05	0.000626964	3749	8423446	8423543	12	-0.124813	0.838429	0.947937	54	ENSG00000142599	-	RERE	1490.91	-0.0446062
chr1	9181525	9182102	9181518	9181645	4	0.788066	0.330205	0.645471	34	9182011	9182153	53	2.95533	1.063e-09	2.98464e-08	129	ENSG00000234546	+	LNCTAM34A	98.4275	1.68733
chr1	9182188	9182337	9182158	9182315	142	3.47478	5.63087e-79	1.74865e-76	1330	9182216	9182406	43	1.95687	1.99396e-15	1.01597e-13	456	ENSG00000234546	+	LNCTAM34A	98.4275	1.68733
chr1	9182461	9182924	9182833	9182976	13	0.462961	0.394521	0.702993	70	9182379	9182538	30	1.64456	3.78882e-06	5.99545e-05	183	ENSG00000228526	-	MIR34AHG	185.389	2.07019
chr1	9234773	9235280	9234741	9235075	528	0.664764	3.06168e-07	5.9494e-06	2526	9235190	9235286	6	-0.726804	0.528953	NA	18	ENSG00000049239	+	H6PD	824.12	1.25602
chr1	9687676	9689270	9687671	9687770	17	-0.560373	0.261	0.572427	87	9689181	9689418	10	-0.582779	0.409428	0.715139	42	ENSG00000171608	+	PIK3CD	1338.87	1.32903
chr1	9942923	9943338	9942922	9943015	11	0.538535	0.537803	0.80552	25	9943240	9943369	251	-0.335304	0.0342412	0.15283	1465	ENSG00000228150	+	ENSG00000228150	7.16757	0.413107
chr1	10411431	10413202	10411417	10411530	13	-0.339537	0.609664	0.84702	49	10413106	10413244	10	-0.0562975	0.926754	0.977705	55	ENSG00000142657	+	PGD	5973.59	-0.177764
chr1	10430442	10430685	10430588	10430698	4	-3.28645	0.0093989	0.0561355	27	10430407	10430571	453	-1.87232	1.91004e-50	3.65992e-48	3735	ENSG00000271989	-	ENSG00000271989	2.59621	-1.79391
chr1	11012653	11013049	11012642	11012751	6121	-0.51027	4.04702e-07	7.70142e-06	21573	11012954	11013103	20	0.594011	0.125584	0.374518	140	ENSG00000120948	+	TARDBP	3274.89	-0.296167
chr1	11020510	11022700	11020444	11020598	44	-0.802159	0.103928	0.331402	92	11022639	11022706	2	-1.28514	0.227798	NA	20	ENSG00000120948	+	TARDBP	3274.89	-0.296167
chr1	11055823	11055924	11055777	11055930	28	-0.776458	0.07053	0.255505	136	11055816	11055918	14	-0.656414	0.266755	0.578813	68	ENSG00000116649	-	SRM	4385.91	-0.324254
chr1	11056651	11058874	11058791	11058900	14	-0.561143	0.339791	0.653992	73	11056598	11056763	16	-0.674273	0.237682	0.544042	79	ENSG00000116649	-	SRM	4385.91	-0.324254
chr1	11099429	11099850	11099746	11099881	2245	-0.885774	8.74756e-19	5.66758e-17	10632	11099400	11099561	70	0.0808441	0.76682	0.920524	371	ENSG00000171824	-	EXOSC10	2341.99	-0.705196
chr1	11273225	11273431	11273188	11273319	189	-0.262425	0.152098	0.421015	1116	11273343	11273438	7	0.283387	0.806134	NA	14	ENSG00000120942	+	UBIAD1	959.111	-0.392405
chr1	11736141	11736556	11736095	11736237	1368	0.191576	0.0619526	0.233752	9499	11736449	11736565	3	-0.180328	0.816074	0.939699	38	ENSG00000177674	+	AGTRAP	1380.44	0.352676
chr1	11908151	11909924	11908148	11908240	1640	0.459163	0.00138375	0.0114856	2119	11909836	11909932	228	-0.067741	0.774321	0.923979	425	ENSG00000285646	+	ENSG00000285646	1.86503	0.367662
chr1	11925599	11926412	11926312	11926431	761	-0.23666	0.466337	0.756186	6132	11925589	11925701	5	-0.0300953	0.972824	0.991653	25	ENSG00000116685	-	KIAA2013	2049.12	-0.418691
chr1	12618018	12618222	12618090	12618418	187	-0.0430161	0.776632	0.924711	1354	12618016	12618112	5	-0.522979	0.605724	NA	20	ENSG00000162496	-	DHRS3	137.43	1.59902
chr1	15409929	15411078	15409878	15410052	5180	-0.629849	9.08534e-06	0.000133233	40139	15410981	15411095	4	1.94274	0.0422299	0.178216	25	ENSG00000142634	+	EFHD2	2852.18	0.15403
chr1	15758750	15759165	15758569	15758866	1678	0.506075	7.60319e-07	1.37187e-05	11644	15759053	15759201	72	1.22835	0.000683618	0.00622584	161	ENSG00000162458	+	FBLIM1	7.73382	2.31274
chr1	16155214	16156068	16155949	16156078	8637	0.418761	1.99195e-05	0.000271911	19712	16155182	16155346	89	-0.147831	0.527007	0.798093	441	ENSG00000142627	-	EPHA2	4653.95	0.936321
chr1	16612793	16613549	16613441	16613586	310	-0.185008	0.160853	0.43555	2412	16612789	16612910	5	1.43904	0.0626731	0.235558	36	ENSG00000219481	-	NBPF1	1400.6	-0.358632
chr1	16978977	16980690	16980569	16980872	411	0.14801	0.269904	0.582365	2994	16978978	16979079	3	0.75221	0.496316	0.777062	21	ENSG00000117122	-	MFAP2	784.182	0.148365
chr1	17189782	17190049	17189774	17189877	1252	1.16431	1.64418e-15	8.4252e-14	1988	17189918	17190054	8	0.511441	0.484881	0.769561	50	ENSG00000204362	+	LINC02783	1.5932	0.439808
chr1	17437748	17438535	17438275	17438582	3196	-0.989777	2.48865e-14	1.16278e-12	7608	17437715	17437840	32	-2.16957	0.000938026	0.00820368	69	ENSG00000179051	-	RCC2	5056.05	-0.298938
chr1	17439325	17439670	17439575	17439726	1896	-0.0319289	0.761087	0.918185	7520	17439314	17439368	5	-1.1896	0.22989	0.534522	23	ENSG00000179051	-	RCC2	5056.05	-0.298938
chr1	19257520	19259162	19257521	19257608	66	-0.779284	0.0978872	0.318442	113	19259078	19259335	9	-1.14385	0.0357968	0.157731	86	ENSG00000053372	+	MRTO4	1898.28	-0.739246
chr1	19312325	19312744	19312280	19312441	344	0.0133148	0.938427	0.981389	1007	19312652	19312752	5	-1.2842	0.19398	0.486414	24	ENSG00000040487	+	SLC66A1	397.98	0.723553
chr1	19385564	19385580	19385494	19385581	7	0.803467	0.336198	0.650536	32	19385543	19385633	6	1.28743	0.278399	NA	15	ENSG00000077549	-	CAPZB	4290.28	-0.142808
chr1	19608078	19608431	19608073	19608187	138836	0.167948	0.0977916	0.31833	421641	19608346	19608443	15	0.626606	0.393844	0.702511	41	ENSG00000226396	+	ENSG00000226396	2168.4	-0.00300833
chr1	20485924	20486209	20486120	20486475	166	0.206776	0.176099	0.459588	1539	20485914	20486011	5	-1.59325	0.166128	NA	20	ENSG00000162545	-	CAMK2N1	2159.69	0.863372
chr1	20507727	20508139	20508008	20508157	423	0.0519288	0.652065	0.868967	7149	20507682	20507952	13	0.653412	0.232843	0.5383	75	ENSG00000090432	-	MUL1	1039.29	0.214581
chr1	20650937	20652330	20652238	20652336	184	0.44517	0.0535844	0.2114	482	20650677	20651024	58	0.422187	0.137079	0.395529	265	ENSG00000117242	-	PINK1-AS	268.22	0.0350333
chr1	20697068	20698533	20698413	20698573	15	0.265217	0.512942	0.788091	131	20697032	20697203	21	0.552258	0.0953512	0.313388	196	ENSG00000117245	-	KIF17	335.045	1.65664
chr1	20786915	20787306	20787207	20787336	5208	0.125849	0.200727	0.496093	25227	20786915	20787012	16	-1.0387	0.0737023	0.263512	69	ENSG00000127483	-	HP1BP3	2783.17	-0.265235
chr1	21176565	21176892	21176763	21176908	1597	0.340808	0.00192314	0.0151926	9246	21176566	21176598	28	0.0264868	0.971498	0.99135	40	ENSG00000075151	-	EIF4G3	1340.02	0.176299
chr1	21290030	21290440	21290347	21290467	1138	0.851617	3.78895e-14	1.74318e-12	7845	21290012	21290135	15	0.62288	0.183812	0.471022	103	ENSG00000117298	-	ECE1	4690.09	0.346981
chr1	21783281	21783619	21783525	21783630	16	0.387385	0.596767	0.83985	40	21783234	21783378	18	-0.103784	0.809591	0.937171	129	ENSG00000090686	-	USP48	1311.73	-0.149584
chr1	23343802	23344316	23344203	23344364	1851	-0.567392	3.51526e-09	9.27027e-08	20975	23343800	23343899	11	1.13365	0.167068	0.445194	31	ENSG00000125944	-	HNRNPR	7707.05	-0.647383
chr1	23369195	23369836	23369184	23369331	224	1.87045	1.55071e-38	2.18638e-36	1696	23369751	23369962	21	1.25512	0.0135342	0.0751345	81	ENSG00000249087	+	ZNF436-AS1	35.8672	0.313944
chr1	23558369	23559500	23559406	23559539	17934	1.33075	2.03296e-29	2.19264e-27	49828	23558364	23558464	8	0.159038	0.801787	0.934111	51	ENSG00000117318	-	ID3	3382.66	0.415634
chr1	23691805	23693904	23691750	23691860	3618	0.228995	0.0799189	0.278322	6700	23693858	23693913	13	1.38495	0.181873	0.468162	22	ENSG00000142676	+	RPL11	18092.3	0.247362
chr1	23799786	23800577	23800448	23800816	624	-0.11758	0.344405	0.658301	3247	23799639	23799873	10	-0.327212	0.544668	0.809491	74	ENSG00000117308	-	GALE	3035.36	1.0008
chr1	23959286	23959642	23959101	23959420	117	-1.86857	2.13727e-16	1.17098e-14	622	23959533	23959683	19	-2.45949	4.56852e-05	0.000573259	97	ENSG00000189266	+	PNRC2	1310.94	-0.20591
chr1	24413534	24413754	24413658	24413797	107	-0.483418	0.0104295	0.0609958	811	24413486	24413673	22	-0.215243	0.479357	0.765543	261	ENSG00000001460	-	STPG1	520.881	1.14729
chr1	24415801	24416948	24415790	24415900	2869	0.771636	8.67478e-14	3.85322e-12	8592	24416859	24417005	16	0.958956	0.0173007	0.0908834	126	ENSG00000001461	+	NIPAL3	1751.54	1.81869
chr1	24502343	24502756	24502314	24502444	12	-0.161936	0.773893	0.92385	65	24502665	24502775	5	-0.284403	0.593802	0.838032	73	ENSG00000117602	+	RCAN3	1011.4	0.0270433
chr1	25232134	25232501	25232385	25232582	460	0.384379	0.00496519	0.0334011	2722	25232133	25232229	5	-0.0884048	0.944349	NA	12	ENSG00000117614	-	SYF2	1132.11	0.472413
chr1	25247129	25247453	25247365	25247462	1233	0.464712	0.0086697	0.0525824	1773	25247125	25247224	5	0.855559	0.358595	0.672419	26	ENSG00000117616	-	RSRP1	407.873	0.442998
chr1	25813901	25815641	25813882	25813987	7	-1.40041	0.191684	NA	21	25815544	25815653	10	0.548266	0.479369	0.765543	32	ENSG00000255054	+	ENSG00000255054	0	NA
chr1	25817726	25819880	25819767	25819928	18	1.17036	0.00272109	0.0203283	145	25817727	25817815	14	-0.214855	0.819482	0.940819	23	ENSG00000228172	-	ENSG00000228172	10.5171	0.44836
chr1	25819977	25820804	25819912	25820065	109	0.756061	2.89967e-05	0.000380255	1000	25820707	25820840	14	1.0131	0.0865203	0.29366	61	ENSG00000117640	+	MTFR1L	1298.42	0.309502
chr1	25859577	25861906	25859544	25859668	13	-0.237244	0.660094	0.872876	71	25861811	25861910	7	1.36115	0.124952	0.373358	27	ENSG00000236528	+	ENSG00000236528	9.6305	0.204156
chr1	25903713	25906044	25905917	25906079	164	-1.78338	4.74118e-14	2.15513e-12	608	25903705	25903812	9	-1.01735	0.208138	0.505571	36	ENSG00000117632	-	STMN1	8542.07	-1.59653
chr1	26111827	26112197	26111797	26111929	118	-0.834476	0.000180746	0.00195411	526	26112102	26112203	4	-1.87354	0.148918	NA	17	ENSG00000175087	+	PDIK1L	272.41	-0.531078
chr1	26280098	26280905	26280051	26280197	48543	0.768021	3.50343e-12	1.31533e-10	151261	26280812	26280916	7	-0.0785135	0.922441	0.976518	34	ENSG00000142669	+	SH3BGRL3	5108.12	0.810205
chr1	26472505	26473055	26472438	26472604	82048	-1.19865	6.58699e-33	7.92275e-31	163603	26472961	26473067	6	0.18993	0.844668	0.949812	21	ENSG00000198830	+	HMGN2	2063.01	-1.10113
chr1	26693289	26695577	26695492	26695630	9	0.349707	0.611404	0.847928	45	26693249	26693388	18	-0.922734	0.070822	0.256343	87	ENSG00000260063	-	ENSG00000260063	15.7694	-0.614862
chr1	26787548	26787871	26787538	26787757	13	0.828141	0.0720282	0.259406	93	26787798	26787890	12	-1.19532	0.105246	0.334154	45	ENSG00000060642	+	PIGV	366.883	0.496713
chr1	26900197	26900456	26900358	26900471	84	0.258209	0.222109	0.524941	653	26900166	26900297	19	0.834649	0.0485263	0.196765	113	ENSG00000198746	-	GPATCH3	661.112	0.153015
chr1	27365707	27366960	27366846	27366991	116	-0.477583	0.00900625	0.0542083	857	27365652	27365771	5	0.369839	0.695812	0.890229	22	ENSG00000142733	-	MAP3K6	897.392	0.198279
chr1	27959558	27959897	27959551	27959654	9	0.633765	0.376209	0.687763	39	27959795	27959921	6	-1.22388	0.0787846	0.27557	51	ENSG00000158156	+	XKR8	8.04524	-0.663793
chr1	28236153	28236419	28236089	28236254	36241	0.228223	0.0187576	0.096842	154880	28236334	28236477	5	0.462852	0.448439	0.744234	54	ENSG00000130770	+	ATP5IF1	1711.79	0.210394
chr1	28582054	28582988	28582899	28582994	10	-1.64185	0.136992	NA	20	28582054	28582141	28	-2.3364	0.000738621	0.00666359	68	ENSG00000197989	-	SNHG12	278.225	-0.4776
chr1	28668783	28669973	28668701	28668859	177	-0.285181	0.089232	0.299757	1163	28669879	28669976	10	-1.81603	0.0986547	0.32004	23	ENSG00000162419	+	GMEB1	716.752	-0.351621
chr1	28736950	28737666	28736925	28737090	2605	-0.00919567	0.933823	0.980031	13613	28737582	28737726	4	0.326552	0.705134	0.895	30	ENSG00000198492	+	YTHDF2	2925.26	-0.0869617
chr1	29181485	29181882	29181749	29181939	958	-0.538703	1.80693e-06	3.02612e-05	15350	29181482	29181598	6	0.42423	0.636406	0.861022	26	ENSG00000116350	-	SRSF4	2244.8	-0.723711
chr1	31760676	31761032	31760890	31761035	25	1.60781	8.26986e-08	1.77011e-06	256	31760670	31760768	9	0.00714915	0.991916	0.997819	39	ENSG00000121753	-	ADGRB2	2414.98	-0.190241
chr1	31762915	31764339	31764215	31764372	904	-0.0671284	0.665944	0.875743	2261	31762900	31763010	7	0.632221	0.316978	0.632647	56	ENSG00000121753	-	ADGRB2	2414.98	-0.190241
chr1	31938042	31938355	31938214	31938386	4839	-0.433963	0.00168818	0.0135989	43321	31937870	31938107	7	-0.341191	0.486778	0.770789	88	ENSG00000184007	-	PTP4A2	5925.02	-0.352465
chr1	32013862	32014429	32013828	32013996	2721	-0.193299	0.123606	0.370704	19749	32014345	32014437	8	-1.83187	0.14723	NA	17	ENSG00000121774	+	KHDRBS1	7360.5	-0.259223
chr1	32073387	32075813	32075729	32075817	9	0.147046	0.868968	0.958768	24	32073385	32073481	4	0.611668	0.434041	0.7334	32	ENSG00000203325	-	ENSG00000203325	0.0536811	0
chr1	32180064	32180519	32179880	32180208	517	0.609385	7.43429e-06	0.000111147	7002	32180430	32180528	3	-0.795022	0.462409	NA	19	ENSG00000084652	+	TXLNA	5388.53	0.139534
chr1	32221712	32222345	32222210	32222374	21	0.519491	0.0570031	0.220765	294	32221575	32221857	11	0.452055	0.325083	0.640876	104	ENSG00000160055	-	TMEM234	189.578	0.166616
chr1	32226233	32228612	32226176	32226320	19	-0.453495	0.386203	0.69606	79	32228523	32228613	7	-0.525547	0.633081	NA	17	ENSG00000084623	+	EIF3I	8785.32	0.0215832
chr1	32240517	32241618	32241367	32241677	32	0.573285	0.00403685	0.0281334	652	32240441	32240599	47	-0.579917	0.0908787	0.303464	218	ENSG00000220785	-	MTMR9LP	23.7747	0.759346
chr1	32650602	32650931	32650842	32651009	93	0.244459	0.294925	0.609608	443	32650602	32650695	6	-1.15604	0.284244	NA	19	ENSG00000176261	-	ZBTB8OS	500.982	-0.246594
chr1	32702937	32703591	32703476	32703626	53	0.871382	0.00324302	0.0234801	250	32702930	32703031	3	0.966255	0.331884	0.64667	21	ENSG00000162520	-	SYNC	467.22	2.0469
chr1	32816768	32817329	32817195	32817395	3373	-0.519317	6.48658e-08	1.41318e-06	36474	32816759	32816857	5	-0.0195227	0.977972	0.993177	45	ENSG00000134684	-	YARS1	8301.05	-0.186266
chr1	32817614	32818181	32817553	32817872	223	-0.132067	0.298227	0.613351	3238	32817947	32818185	19	-1.21176	0.00434685	0.0299148	136	ENSG00000116497	+	S100PBP	847.54	-0.783703
chr1	32963901	32964813	32964719	32964850	709	0.916969	4.696e-12	1.7386e-10	2713	32963894	32964009	3	3.947	0.00935092	NA	14	ENSG00000116514	-	RNF19B	1156.42	1.18198
chr1	34984964	34985324	34985208	34985351	2484	0.445725	5.80232e-05	0.000711678	9944	34984917	34985108	35	-0.303799	0.266562	0.578621	297	ENSG00000284773	-	ENSG00000284773	2.49008	1.82171
chr1	35031819	35031944	35031818	35031973	115	0.421429	0.0249833	0.120836	1018	35031815	35031914	3	-0.377862	0.711963	NA	19	ENSG00000163867	-	ZMYM6	269.237	0.547802
chr1	35192754	35193144	35193052	35193153	23839	-0.493888	2.98488e-06	4.80885e-05	38972	35192695	35192861	7	-0.632421	0.0795184	0.277396	181	ENSG00000116560	-	SFPQ	14068.6	-0.471317
chr1	35557441	35557637	35557545	35557668	17	0.432691	0.31418	0.629696	106	35557412	35557574	16	0.0852532	0.84835	0.951331	106	ENSG00000142687	-	KIAA0319L	1618.33	0.601014
chr1	35769571	35769966	35769866	35770008	561	-4.73873	1.30508e-138	7.70716e-136	3598	35769567	35769667	7	-5.15627	0.000265656	0.00273699	26	ENSG00000092853	-	CLSPN	1421.13	-3.41794
chr1	35930717	35931046	35930693	35930813	120	0.61428	0.0152659	0.0824236	337	35930931	35931080	9	-0.461353	0.44519	0.741695	67	ENSG00000126070	+	AGO3	1015.49	-0.154769
chr1	36156162	36157033	36156149	36156305	3955	0.0154279	0.899818	0.969278	28999	36156948	36157036	5	-0.112255	0.904992	0.971012	22	ENSG00000116871	+	MAP7D1	7419.38	-0.368707
chr1	36176730	36177961	36176689	36176822	6	0.410845	0.506686	0.783827	53	36177861	36177964	2	1.13035	0.25926	0.570569	22	ENSG00000116871	+	MAP7D1	7419.38	-0.368707
chr1	36178740	36179024	36178680	36178827	40	-0.222235	0.380111	0.691334	387	36178928	36179035	5	-0.562776	0.555873	0.816455	24	ENSG00000116871	+	MAP7D1	7419.38	-0.368707
chr1	36397326	36397887	36397797	36397916	1611	0.388233	0.000238287	0.00248774	8142	36397301	36397415	2	0.326258	0.749308	NA	18	ENSG00000181817	-	LSM10	1158.18	-0.0681066
chr1	37474579	37476739	37474545	37474638	327	0.14391	0.535617	0.803829	725	37476649	37476754	11	0.0966632	0.873377	0.960064	58	ENSG00000163874	+	ZC3H12A	294.773	0.909031
chr1	37690730	37692230	37692100	37692283	104	-1.00836	3.45843e-06	5.50897e-05	688	37690719	37690827	5	-3.6516	0.014064	NA	18	ENSG00000116922	-	C1orf109	690.351	-0.758171
chr1	37807793	37808177	37807751	37807927	1254	0.358498	0.0025956	0.0195367	6992	37808064	37808211	1091	-0.112335	0.337541	0.651822	6737	ENSG00000197982	+	C1orf122	1201.84	0.184533
chr1	38859539	38859748	38859616	38859780	713	0.394696	0.000342817	0.00340581	7031	38859535	38859571	18	1.16582	0.0463655	0.190526	65	ENSG00000116954	-	RRAGC	759.873	0.415714
chr1	39575860	39576789	39576697	39576826	12581	0.215181	0.0589658	0.225818	27760	39575823	39575979	9	0.114986	0.774016	0.923882	185	ENSG00000090621	-	PABPC4	8001.06	-0.169109
chr1	40040239	40040464	40040027	40040336	64	0.314	0.369932	0.682513	220	40040350	40040501	25	-0.126854	0.79259	0.931027	95	ENSG00000131236	+	CAP1	11183	0.0878661
chr1	40691703	40692065	40691673	40691825	473	-3.59168e-05	0.999763	0.99995	4516	40691946	40692109	137	-0.0644092	0.765012	0.919744	597	ENSG00000066136	+	NFYC	2882.41	-0.00251508
chr1	41241456	41242216	41242027	41242452	115	-0.252835	0.221463	0.52414	669	41241417	41241585	33	0.330491	0.274385	0.587353	247	ENSG00000010803	-	SCMH1	894.726	-0.407799
chr1	41361433	41363166	41361424	41361561	6	-0.96993	0.187423	0.476453	46	41363143	41363170	21	0.433746	0.577871	0.829174	37	ENSG00000204060	+	FOXO6	574.659	-0.851389
chr1	42335377	42335879	42335786	42335886	6	0.0886702	0.92625	0.977507	23	42335344	42335509	8	0.0715342	0.883693	0.963901	86	ENSG00000198815	-	FOXJ3	2815.53	-0.142107
chr1	42682426	42682583	42682417	42682523	213234	-0.31851	0.237483	0.543778	288959	42682450	42682621	16	0.251638	0.486033	0.770422	179	ENSG00000065978	+	YBX1	24718.7	-0.0278887
chr1	42817121	42817394	42817086	42817221	456	0.893849	3.09137e-09	8.20838e-08	1426	42817262	42817408	443	0.323605	0.00661891	0.0423172	5211	ENSG00000164010	+	ERMAP	259.046	0.0644803
chr1	42844525	42846421	42846306	42846432	78	0.559567	0.064825	0.241242	251	42844526	42844611	10	1.91494	0.151894	NA	12	ENSG00000228192	-	ENSG00000228192	148.584	0.258139
chr1	42929961	42931195	42931109	42931209	8	-0.0780566	0.926208	0.977507	28	42929895	42930054	5	1.50928	0.0531843	0.210225	35	ENSG00000117394	-	SLC2A1	3718.82	0.411276
chr1	42941213	42943311	42943225	42943320	19	0.0964686	0.89045	0.966407	49	42941205	42941305	3	0.854048	0.487907	NA	16	ENSG00000117394	-	SLC2A1	3718.82	0.411276
chr1	43172349	43172526	43172323	43172440	6	-0.0181338	0.978151	0.993239	51	43172431	43172541	5	-0.343767	0.662838	0.874257	34	ENSG00000243710	+	CFAP57	63.3665	0.383285
chr1	43348700	43349015	43348928	43349038	7	-0.673711	0.286851	0.600814	53	43348691	43348798	3	0.28962	0.768501	0.921176	21	ENSG00000287113	-	ENSG00000287113	0.0546062	0
chr1	43366863	43368010	43367909	43368041	2271	0.29605	0.00938745	0.0560997	12825	43366862	43366951	10	-1.04242	0.362016	NA	18	ENSG00000066322	-	ELOVL1	4082.73	0.32598
chr1	43453475	43453908	43453651	43453973	2223	0.420368	0.000256628	0.0026588	16783	43453474	43453499	4	0.210372	0.863155	NA	14	ENSG00000178922	-	HYI	3.62906	-0.53854
chr1	43707535	43707967	43707523	43707635	442	0.0793389	0.573297	0.826579	2741	43707879	43707988	4	0.638748	0.560363	NA	17	ENSG00000126091	+	ST3GAL3	20.262	0.407158
chr1	43946375	43946598	43946514	43946656	12	-0.629198	0.246533	0.554904	76	43946371	43946467	2	-1.51529	0.185966	NA	18	ENSG00000288573	-	ENSG00000288573	7.30414	0.3116
chr1	43979217	43981450	43979187	43979332	2404	-0.582949	0.175957	0.459318	10880	43981353	43981456	3	0.474105	0.599268	0.841087	26	ENSG00000117411	+	B4GALT2	5124.63	-0.186609
chr1	44030413	44031461	44030379	44030534	364	0.95498	9.8595e-11	3.14592e-09	1475	44031330	44031623	37	-1.46934	9.31059e-13	3.74749e-11	738	ENSG00000230615	+	ENSG00000230615	71.933	1.78033
chr1	44631967	44632349	44631954	44632068	2969	-0.583441	2.29628e-07	4.56639e-06	13526	44632163	44632394	23	-0.304754	0.504114	0.781964	131	ENSG00000187147	+	RNF220	1970.78	-0.240906
chr1	44775602	44776050	44775563	44775700	516	-0.249033	0.0189108	0.09739	6257	44775958	44776062	21	0.43269	0.549578	0.81238	40	ENSG00000142937	+	RPS8	15268.4	0.126417
chr1	44776712	44777753	44776666	44776798	204	0.319696	0.147132	0.41226	606	44777660	44777791	8	0.236802	0.773464	0.923723	36	ENSG00000142937	+	RPS8	15268.4	0.126417
chr1	44777670	44778040	44777627	44777791	739	0.28895	0.0702218	0.25476	3309	44777998	44778092	7	0.675937	0.314074	0.629642	43	ENSG00000142937	+	RPS8	15268.4	0.126417
chr1	44800376	44800930	44800339	44800472	3963	1.73671	1.44636e-40	2.19843e-38	7988	44800784	44800933	3	1.04263	0.211328	0.509675	28	ENSG00000173846	+	PLK3	1035.16	1.83101
chr1	45303892	45304074	45303849	45304025	6	0.00915664	0.984678	0.995261	96	45303978	45304075	5	-0.955394	0.303076	0.618492	27	ENSG00000281912	+	LINC01144	35.5786	0.436802
chr1	45339721	45339969	45339874	45340125	46	-1.23525	5.47438e-05	0.000675017	303	45339713	45339814	13	-0.232308	0.703288	0.894099	55	ENSG00000132781	-	MUTYH	17.865	-0.65837
chr1	45340222	45340413	45340010	45340328	129	-1.65812	1.6068e-20	1.14392e-18	1140	45340298	45340447	21	0.0701668	0.841492	0.948913	181	ENSG00000132773	+	TOE1	795.22	-1.32251
chr1	45584044	45584668	45584035	45584138	7304	-2.06287	1.51627e-88	5.40805e-86	13278	45584536	45584678	13	-4.42111	2.67513e-06	4.35265e-05	85	ENSG00000132780	+	NASP	5410.29	-1.39952
chr1	45686694	45687101	45686981	45687148	498	-0.595859	1.01525e-06	1.78971e-05	4194	45686680	45686766	4	-1.0532	0.264721	0.576603	26	ENSG00000159592	-	GPBP1L1	2824.48	0.0737084
chr1	45687352	45688060	45687971	45688115	93	0.00704061	0.97592	0.992492	437	45687302	45687448	41	-0.435544	0.274173	0.58718	135	ENSG00000159592	-	GPBP1L1	2824.48	0.0737084
chr1	45688195	45688400	45688162	45688288	1005	0.0163018	0.890342	0.966407	3270	45688307	45688404	7	-0.757078	0.589462	NA	13	ENSG00000159596	+	TMEM69	897.387	0.00593747
chr1	46132754	46132915	46132777	46132919	35	1.27167	0.000246491	0.00256262	188	46132750	46132841	4	0.940798	0.385624	NA	18	ENSG00000117461	-	PIK3R3	535.515	0.605976
chr1	46196964	46198438	46198338	46198455	4725	0.462756	3.37829e-06	5.39083e-05	31390	46196962	46197054	4	0.209309	0.852073	NA	15	ENSG00000085998	-	POMGNT1	2899.64	0.438777
chr1	46303149	46303276	46303166	46303337	3080	0.354455	0.000505154	0.00477873	12530	46303145	46303237	11	0.81765	0.363258	0.676374	24	ENSG00000132128	-	LRRC41	2423.25	0.882421
chr1	47333913	47334222	47333770	47334037	3175	0.244228	0.0250691	0.12117	39298	47334127	47334225	6	-1.4558	0.160163	0.434514	22	ENSG00000162368	+	CMPK1	3640.84	-0.076452
chr1	51236318	51236733	51236261	51236412	5569	0.574581	1.71864e-06	2.8917e-05	33529	51236648	51236897	8	1.23778	0.0478411	0.19479	51	ENSG00000123091	+	RNF11	3363.87	0.105656
chr1	51518273	51519274	51519179	51519395	248	0.00889388	0.956023	0.986813	1198	51518272	51518370	4	-0.143579	0.858942	0.955549	32	ENSG00000085832	-	EPS15	1727.38	0.118948
chr1	51878349	51878726	51878628	51878765	5305	0.2073	0.033556	0.150508	21211	51878337	51878445	17	0.246506	0.758126	0.917111	34	ENSG00000078618	-	NRDC	5901.98	-0.25223
chr1	52365443	52366155	52366059	52366217	1083	0.185352	0.0921715	0.306385	7150	52365406	52365540	10	-1.33795	0.0115734	0.0661399	92	ENSG00000154222	-	CC2D1B	1262.28	0.416876
chr1	52920433	52921728	52921616	52921740	43	0.314463	0.420512	0.7234	135	52920426	52920534	5	-0.564778	0.430545	0.730953	40	ENSG00000121310	-	ECHDC2	0.821495	-0.67012
chr1	53213700	53214740	53214608	53214741	15	-0.0144782	0.979401	0.993455	68	53213701	53213790	14	0.277931	0.717103	0.899904	36	ENSG00000236723	-	ENSG00000236723	8.63006	-1.69181
chr1	53326459	53328069	53327946	53328118	555	-1.46423	8.04451e-07	1.44498e-05	2840	53326424	53326546	7	-2.67673	0.0159292	0.0853016	28	ENSG00000157193	-	LRP8	1387.39	-0.232578
chr1	53946075	53946313	53946048	53946169	30	0.610994	0.0777206	0.273017	170	53946228	53946334	131	0.282378	0.274048	0.58709	357	ENSG00000116212	+	LRRC42	1948.99	-0.159785
chr1	53946352	53946596	53946311	53946452	717	0.085769	0.470083	0.758796	6277	53946462	53946600	6	0.240343	0.66546	0.875489	65	ENSG00000116212	+	LRRC42	1948.99	-0.159785
chr1	54052842	54053200	54053106	54053455	14309	0.845206	8.39747e-16	4.3937e-14	52920	54052820	54052928	5	0.587089	0.4236	0.725764	37	ENSG00000116209	-	TMEM59	2151.51	0.217769
chr1	54886582	54887194	54887098	54887236	36224	0.0474978	0.64031	0.863255	99191	54886563	54886673	49	0.59165	0.196014	0.489744	108	ENSG00000116133	-	DHCR24	11396.7	-0.0615951
chr1	61742429	61742697	61742264	61742560	158	0.361749	0.0328237	0.148099	1028	61742570	61742702	7	-0.880329	0.152273	0.421318	76	ENSG00000132849	+	PATJ	945.44	0.251192
chr1	63593410	63594215	63593227	63593531	1317	0.0931183	0.406375	0.712484	7213	63594125	63594226	8	-0.688493	0.510816	NA	22	ENSG00000079739	+	PGM1	2273.38	0.34461
chr1	65066938	65067731	65067636	65067746	15	-0.325475	0.525138	0.796752	84	65066931	65067033	13	-1.24703	0.0720126	0.259363	54	ENSG00000162434	-	JAK1	3554.1	0.247924
chr1	66533593	66533870	66533584	66533687	326	0.12435	0.382759	0.693462	1863	66533775	66533908	13	-0.756486	0.153492	0.423274	79	ENSG00000118473	+	SGIP1	5.65702	-0.0339308
chr1	66924989	66925205	66924937	66925103	817	0.442537	0.000952195	0.00832154	3622	66925077	66925239	18	-0.0845339	0.876155	0.961118	72	ENSG00000198160	+	MIER1	1541.75	0.169132
chr1	67054000	67054147	67053855	67054179	390	0.572663	1.14685e-06	1.99582e-05	3525	67053997	67054087	7	-0.780948	0.535631	NA	13	ENSG00000116704	-	SLC35D1	695.792	0.329753
chr1	67430017	67430385	67430288	67430425	16605	-0.431482	0.000213731	0.00226585	83208	67429983	67430109	19	-0.767312	0.120711	0.365032	91	ENSG00000142864	-	SERBP1	8492.37	-0.415355
chr1	67685200	67686721	67685171	67685336	20372	1.25461	1.53433e-28	1.58828e-26	39006	67686511	67686774	7	1.85576	0.000363174	0.00357942	83	ENSG00000116717	+	GADD45A	2827.4	2.18148
chr1	67832306	67832828	67832276	67832400	27	-0.0613172	0.864239	0.957556	170	67832703	67832839	17	-0.0650078	0.901308	0.969702	78	ENSG00000232284	+	GNG12-AS1	1.19817	-0.384948
chr1	67833221	67833437	67833341	67833477	8767	-0.257947	0.00990443	0.0585962	70544	67833177	67833309	5	-0.0721368	0.908737	0.972344	53	ENSG00000172380	-	GNG12	5499.88	0.0298382
chr1	68496695	68497081	68496949	68497120	3114	-4.57322	6.50263e-285	1.6732e-281	15020	68496673	68496783	7	-1.90214	0.0349876	0.155195	34	ENSG00000024526	-	DEPDC1	1136.91	-2.90729
chr1	70353844	70354721	70354624	70354733	733	0.346912	0.00469035	0.0318617	5132	70353836	70353931	8	1.46418	0.0162917	0.0867548	59	ENSG00000118454	-	ANKRD13C	984.325	-0.137559
chr1	72282960	72283507	72282932	72283063	9	-0.241239	0.677145	0.881767	64	72283418	72283512	3	0.496765	0.681206	NA	14	ENSG00000286863	+	ENSG00000286863	1.39071	-2.52558
chr1	74733151	74733411	74733142	74733323	1033	0.140422	0.243185	0.550905	6297	74733320	74733415	6	-0.104144	0.908048	0.972142	26	ENSG00000162623	+	TYW3	1381.56	-0.129089
chr1	75724408	75724642	75724403	75724526	18	0.568513	0.173624	0.455822	124	75724528	75724662	10	-0.62599	0.200159	0.495342	97	ENSG00000117054	+	ACADM	1198.5	-0.223774
chr1	76699947	76700058	76699749	76699983	15	-0.728861	0.112612	0.349022	116	76699971	76700088	2	-1.39876	0.139577	0.399892	26	ENSG00000226415	+	TPI1P1	18913.8	-0.367328
chr1	77759235	77759810	77759683	77759865	1772	0.192268	0.0567981	0.220142	9486	77759232	77759326	3	-1.954	0.113934	NA	18	ENSG00000077254	-	USP33	1769.85	-0.111772
chr1	77888387	77888549	77888217	77888398	86	0.932501	1.57806e-06	2.67517e-05	667	77888463	77888552	18	0.861586	0.267328	0.579549	32	ENSG00000162614	+	NEXN	631.272	0.453561
chr1	77888627	77889258	77888516	77888726	1595	0.697668	4.26182e-10	1.25789e-08	18902	77889015	77889437	40	1.19318	5.49606e-06	8.44024e-05	328	ENSG00000162614	+	NEXN	631.272	0.453561
chr1	77888881	77889879	77889775	77889884	5	1.21153	0.0500958	0.201398	55	77888874	77888974	5	0.771014	0.459222	NA	20	ENSG00000235927	-	NEXN-AS1	24.9712	2.16656
chr1	77979176	77979500	77979158	77979425	122	0.441466	0.00388333	0.0272294	1882	77979416	77979504	15	0.958677	0.171882	0.453063	40	ENSG00000162616	+	DNAJB4	886.084	-0.262465
chr1	84078078	84078582	84078022	84078205	1313	0.251672	0.0406809	0.173336	6299	84078488	84078592	9	-0.637477	0.434083	0.7334	32	ENSG00000142875	+	PRKACB	508.906	-0.450573
chr1	84298482	84299232	84298355	84298625	170	-0.481066	0.0718631	0.259009	359	84299152	84299256	8	-3.41178	0.00580433	0.0379512	30	ENSG00000203943	+	SAMD13	5.86758	0.0856792
chr1	84506329	84506577	84506483	84506612	431	-0.0584021	0.736933	0.908161	1303	84506291	84506427	19	-0.0444509	0.884914	0.964622	248	ENSG00000174021	-	GNG5	638.658	-0.0103825
chr1	84573308	84574417	84574323	84574483	1616	0.815795	1.1657e-14	5.60651e-13	10295	84573303	84573398	31	-0.546306	0.257792	0.568793	93	ENSG00000117151	-	CTBS	327.775	1.1272
chr1	85276310	85276509	85276382	85276722	804	0.57304	5.44137e-09	1.39415e-07	14062	85276294	85276399	27	-0.29322	0.515674	0.790215	101	ENSG00000142867	-	BCL10	1045.44	0.905104
chr1	85276989	85278956	85276987	85277082	8	1.00639	0.267812	0.580023	23	85278859	85278966	9	-0.771362	0.384584	0.694802	28	ENSG00000223653	+	ENSG00000223653	12.4557	0.553751
chr1	85464766	85465158	85465064	85465170	14096	0.00472239	0.961685	0.988516	32625	85464725	85464892	53	0.218615	0.278376	0.591941	667	ENSG00000153904	-	DDAH1	1360.62	0.138061
chr1	85576734	85577100	85576842	85577105	14	0.168281	0.648332	0.867465	175	85576699	85576824	20	0.987389	0.0133129	0.0741805	132	ENSG00000282057	-	ENSG00000282057	71.6098	1.70855
chr1	85577405	85578196	85578048	85578501	2878	0.717084	2.73904e-14	1.27398e-12	33524	85577386	85577479	9	-0.0428107	0.958825	0.98771	30	ENSG00000282057	-	ENSG00000282057	71.6098	1.70855
chr1	85580760	85581533	85580754	85580855	207959	0.461787	1.69865e-06	2.8652e-05	245167	85581410	85581580	77	0.45375	0.0600443	0.228635	440	ENSG00000142871	+	CCN1	9067.11	1.16417
chr1	85708083	85708414	85708289	85708447	2137	0.0845708	0.49133	0.773678	7390	85708006	85708192	25	-0.327465	0.361468	0.674961	200	ENSG00000117174	-	ZNHIT6	1043.3	0.117149
chr1	86704575	86704709	86704539	86704705	898	0.371493	0.00119985	0.0101677	5056	86704582	86704743	23	1.17478	2.86107e-05	0.000375946	280	ENSG00000097033	+	SH3GLB1	2339.96	0.0360581
chr1	86704827	86705353	86704767	86704943	1692	0.604902	2.37589e-09	6.41349e-08	19846	86705264	86705356	8	1.52939	0.0555948	0.216815	32	ENSG00000097033	+	SH3GLB1	2339.96	0.0360581
chr1	87328481	87329010	87328469	87328622	2008	-2.0857	4.84738e-63	1.18789e-60	8412	87328919	87329013	17	-1.73273	0.0319613	0.145333	41	ENSG00000143013	+	LMO4	911.217	-0.424401
chr1	88684272	88684741	88684229	88684492	1267	-0.0379008	0.760807	0.918048	10045	88684616	88684753	39	0.571964	0.120923	0.36549	153	ENSG00000065243	+	PKN2	1953.68	-0.391149
chr1	89632706	89632922	89632813	89632956	35	0.357183	0.242361	0.55	258	89632704	89632819	29	-0.86104	0.0217652	0.108558	177	ENSG00000231999	-	LRRC8C-DT	43.0822	0.19099
chr1	89821011	89821793	89820943	89821100	131	-0.71597	0.000170851	0.00185913	903	89821644	89821805	11	-1.79471	0.00703645	0.0445401	61	ENSG00000171492	+	LRRC8D	474.91	0.0746983
chr1	92029975	92030386	92029809	92030237	142	0.293664	0.0281496	0.132235	2087	92030085	92030450	184	-0.152446	0.408059	0.71389	919	ENSG00000172031	+	EPHX4	0.112376	0
chr1	92784293	92785107	92784978	92785152	1883	0.914756	1.12443e-15	5.83658e-14	12652	92784287	92784386	4	2.42769	0.0237447	0.116211	25	ENSG00000067208	-	EVI5	570.707	0.595372
chr1	92836211	92837523	92836199	92836376	332	0.248156	0.105402	0.334492	1795	92837454	92837552	3	1.50238	0.0921242	0.306313	26	ENSG00000122406	+	RPL5	12958.6	0.135193
chr1	93179934	93180412	93180294	93180443	3151	0.0413699	0.6711	0.878843	19189	93179880	93180033	6	-0.597504	0.27328	0.586279	77	ENSG00000117500	-	TMED5	3000.52	-0.510398
chr1	93180723	93181144	93180686	93180838	255	-3.54601	1.56052e-43	2.52086e-41	925	93181035	93181159	8	-2.34177	0.00334749	0.0241201	51	ENSG00000122483	+	CCDC18	240.851	-1.82784
chr1	93680526	93681836	93681716	93681881	11029	0.221115	0.036672	0.160458	19534	93680514	93680615	45	-0.88438	0.097334	0.317356	79	ENSG00000137936	-	BCAR3	925.189	0.26142
chr1	93681011	93682266	93682182	93682267	5	-0.600352	0.551696	0.813641	25	93680952	93681105	13	0.497455	0.35226	0.666379	73	ENSG00000137936	-	BCAR3	925.189	0.26142
chr1	93846731	93847218	93847091	93847257	250	-0.43569	0.0245499	0.119236	729	93846662	93846765	5	-1.111	0.151572	0.420128	39	ENSG00000137936	-	BCAR3	925.189	0.26142
chr1	94324526	94325409	94325205	94325425	29	-0.243476	0.69526	0.88996	54	94324462	94324553	6	-1.03456	0.247048	0.555682	29	ENSG00000236098	-	ENSG00000236098	26.8705	0.438094
chr1	94926890	94927109	94926972	94927152	10237	0.384322	8.73449e-05	0.00102358	110718	94926876	94926979	5	0.310202	0.701373	0.89301	31	ENSG00000117519	-	CNN3	7483.66	-0.0468203
chr1	94927395	94927517	94927352	94927492	1478	0.32775	0.00634319	0.0408699	4843	94927424	94927527	123	0.514433	0.0960363	0.314729	219	ENSG00000235501	+	CNN3-DT	247.127	-0.260011
chr1	96721787	96722421	96721755	96721882	602	-0.382633	0.0082098	0.050314	1591	96722337	96722435	5	-0.758193	0.439401	0.737639	23	ENSG00000117569	+	PTBP2	717.095	-0.242938
chr1	98044798	98046223	98046124	98046261	57	1.03959	0.000290799	0.00295629	265	98044796	98044886	8	-0.799511	0.484978	NA	16	ENSG00000225206	-	MIR137HG	26.4052	2.09844
chr1	98661722	98662092	98661664	98661820	1677	0.461483	1.4327e-05	0.000201961	10047	98662001	98662104	7	1.58122	0.0409393	0.174114	38	ENSG00000162627	+	SNX7	961.996	-0.0687949
chr1	100038094	100038835	100038083	100038194	2739	0.148186	0.183102	0.470011	8781	100038748	100038841	5	-1.82663	0.0521775	0.207223	33	ENSG00000156875	+	MFSD14A	64.4485	-0.291177
chr1	100894913	100895157	100894875	100895038	160	-0.441361	0.0578352	0.222886	439	100895052	100895163	98	-0.947202	0.00239795	0.0182434	262	ENSG00000273204	+	ENSG00000273204	19.0307	1.47271
chr1	101025893	101026104	101025844	101025998	261	0.18655	0.163099	0.438992	2219	101026017	101026113	38	0.165055	0.695894	0.890229	112	ENSG00000233184	+	ENSG00000233184	96.8825	-0.135066
chr1	101236290	101236623	101236539	101236635	6	0.484747	0.564733	0.82147	27	101236220	101236387	5	0.68832	0.256174	0.567116	52	ENSG00000225938	-	ENSG00000225938	1.32545	1.85691
chr1	103525719	103525923	103525693	103525812	76	0.744205	0.00168479	0.0135822	417	103525828	103525930	4	0.559053	0.614621	NA	15	ENSG00000185946	+	RNPC3	182.331	0.16736
chr1	105891509	105893061	105891505	105891636	27	0.309484	0.511524	0.787205	95	105892973	105893062	7	-0.544474	0.566746	0.822685	27	ENSG00000232952	+	ENSG00000232952	957.166	-0.535209
chr1	107056699	107057477	107056659	107056799	465	-0.433098	0.000911133	0.00800346	3335	107057388	107057530	16	-1.49141	0.00136531	0.0113626	116	ENSG00000198890	+	PRMT6	1522.65	-0.104584
chr1	108199930	108200246	108200059	108200374	981	-0.497988	6.47864e-05	0.000785304	12903	108199923	108200022	6	1.34242	0.141642	0.403228	26	ENSG00000085491	-	SLC25A24	1463.34	-0.521217
chr1	108200412	108200867	108200403	108200551	26	0.132657	0.733029	0.906341	145	108200780	108200914	14	0.647442	0.249493	0.558794	64	ENSG00000280186	+	ENSG00000280186	1.13684	-0.487944
chr1	108746673	108747404	108746642	108746787	781	0.479855	4.2999e-05	0.000542717	3841	108747311	108747431	23	0.199174	0.701588	0.893093	74	ENSG00000116266	+	STXBP3	1209.51	0.604768
chr1	109090772	109090890	109090733	109090887	637	0.399592	0.000553495	0.00517354	5142	109090806	109090935	88	0.544099	0.102255	0.327961	197	ENSG00000215717	+	TMEM167B	1737.49	0.17336
chr1	109483958	109484207	109483912	109484075	171	0.167239	0.320583	0.636371	951	109484120	109484212	7	-1.13621	0.146197	0.410901	40	ENSG00000162650	+	ATXN7L2	525.032	0.180363
chr1	109494099	109494296	109494052	109494200	87	0.658998	0.000559672	0.00522222	689	109494201	109494303	3	0.89562	0.414692	NA	17	ENSG00000174151	+	CYB561D1	1013.72	0.789619
chr1	109619836	109620855	109619813	109619975	1165	0.276536	0.0151595	0.0820081	5715	109620767	109620856	9	-2.04852	0.101762	NA	20	ENSG00000116337	+	AMPD2	5180.38	0.352882
chr1	110963332	110963921	110963813	110963982	2246	0.0521146	0.618049	0.852068	6774	110963302	110963454	19	1.10804	0.00596996	0.0388544	127	ENSG00000121931	-	LRIF1	1.54232	-0.639291
chr1	111139818	111140158	111140005	111140192	196	0.529621	9.07015e-05	0.00105705	2130	111139451	111139929	13	0.873559	0.00249432	0.0188709	274	ENSG00000156171	-	DRAM2	686.652	-0.0959078
chr1	111448667	111449255	111449130	111449289	1049	0.0990411	0.45015	0.745115	4160	111448658	111448765	19	0.407189	0.372526	0.684777	103	ENSG00000116455	-	WDR77	2824.15	-0.0482846
chr1	111738606	111739388	111739273	111739427	150	2.10357	6.53773e-36	8.57967e-34	1145	111738578	111738695	17	3.09315	1.83513e-06	3.06907e-05	69	ENSG00000197852	-	INKA2	2078.25	2.66626
chr1	112619175	112619755	112619598	112619797	22	0.166975	0.666584	0.876186	151	112619150	112619309	163	0.399588	0.0142377	0.0780657	1144	ENSG00000007341	-	ST7L	440.68	0.0557422
chr1	112702606	112703701	112703635	112703796	18	0.320122	0.36196	0.675362	167	112702553	112702700	25	1.04784	0.0251364	0.121426	113	ENSG00000155366	-	RHOC	8101.85	0.875185
chr1	113449659	113450426	113449654	113449769	6750	-0.790452	2.08453e-14	9.82878e-13	15777	113450337	113450427	24	0.306249	0.679987	0.883071	48	ENSG00000232499	+	ENSG00000232499	1029.93	-0.549541
chr1	114535963	114536623	114535956	114536051	41	-0.033306	0.944695	0.9835	92	114536497	114536633	14	0.163877	0.744393	0.911275	82	ENSG00000236480	+	PKMP1	1897.41	0.254028
chr1	115336971	115338235	115338142	115338297	713	0.42848	0.19899	0.493533	1593	115336970	115337060	5	1.49406	0.225025	NA	13	ENSG00000134259	-	NGF	8.66632	0.854371
chr1	117060326	117060844	117060276	117060417	51	-1.61758	6.64454e-06	0.000100402	205	117060756	117060845	7	-0.284812	0.812123	NA	15	ENSG00000116830	+	TTF2	1630.1	-1.50228
[truncated: 4,600 more rows]

## Sheet: SuperPromoters_extended_U2OS
chr	super-Promoter_start	super-Promoter_end	peak#1_start	peak#1_end	hostTSS	peak#1_l2fc	peak#1_pval	peak#1_adj_pval	peak#1_readcount	peak#2_start	peak#2_end	daTSS	peak#2_l2fc	peak#2_pval	peak#2_adj_pval	peak#2_readcount	host_gene	orientation	hgnc	host_gene_baseMean	host_gene_lfc
[truncated: 6,809 more rows]

[truncated: 1 more sheets: SuperPromoters_extended_joint]
