# Supplementary material for: Super-promoters: Cooperativity between juxtaposed promoters
Source: Research Square preprint supplement (doi:10.21203/rs.3.rs-2803901/v1), 2023-05-25
Supplement: Supplementary file 3 [file b439f7c83e8974d479b2f33f.xlsx]

## Sheet: daRNA_MCF-7
chr	daRNA_start	daRNA_end	strand	host_gene	daRNA_name/annotation	hgnc_host_gene	novel
chr1	916872	925602	-	ENSG00000187634	ENSG00000187634_daRNA	SAMD11	True
chr1	965298	966976	-	ENSG00000187583	ENSG00000187583_daRNA	PLEKHN1	True
chr1	1001068	1001944	-	ENSG00000187608	ENSG00000187608_daRNA	ISG15	True
chr1	1307794	1308597	+	ENSG00000131584	ENSG00000131584_daRNA	ACAP3	True
chr1	1309609	1309828	-	ENSG00000169972	ENSG00000169972_daRNA	PUSL1	True
chr1	1317383	1318646	+	ENSG00000127054	ENSG00000127054_daRNA	INTS11	True
chr1	1406570	1410680	+	ENSG00000242485	ENSG00000242485_daRNA	MRPL20	True
chr1	1574764	1575634	+	ENSG00000160075	ENSG00000160075_daRNA	SSU72	True
chr1	1613758	1615795	-	ENSG00000197530	ENSG00000272106	MIB2	False
chr1	1613763	1616169	-	ENSG00000197530	ENSG00000197530_daRNA	MIB2	True
chr1	1692536	1694333	+	ENSG00000189339	ENSG00000189339_daRNA	SLC35E2B	True
chr1	1745811	1748652	+	ENSG00000215790	ENSG00000215790_daRNA	SLC35E2A	True
chr1	1754101	1757399	+	ENSG00000008130	ENSG00000008130_daRNA	NADK	True
chr1	1891087	1891752	-	ENSG00000231050	ENSG00000231050_daRNA	ENSG00000231050	True
chr1	2412792	2426081	+	ENSG00000157911	ENSG00000157911_daRNA	PEX10	True
chr1	3064080	3070377	-	ENSG00000142611	ENSG00000142611_daRNA	PRDM16	True
chr1	3622860	3625688	-	ENSG00000158109	ENSG00000158109_daRNA	TPRG1L	True
chr1	6235483	6238411	+	ENSG00000116237	ENSG00000116237_daRNA	ICMT	True
chr1	6393555	6394391	+	ENSG00000097021	ENSG00000271746	ACOT7	False
chr1	6601302	6613730	+	ENSG00000162413	ENSG00000162413_daRNA	KLHL21	True
chr1	8878835	8879894	+	ENSG00000074800	ENSG00000230679	ENO1	False
chr1	9165691	9182101	-	ENSG00000234546	ENSG00000234546_daRNA	LNCTAM34A	True
chr1	9182004	9196284	+	ENSG00000228526	ENSG00000234546	MIR34AHG	False
chr1	10430433	10442808	+	ENSG00000271989	ENSG00000175279	ENSG00000271989	False
chr1	11099431	11102097	+	ENSG00000171824	ENSG00000171824_daRNA	EXOSC10	True
chr1	11691481	11725856	+	ENSG00000116670	ENSG00000116670_daRNA	MAD2L2	True
chr1	11909808	11909927	-	ENSG00000285646	ENSG00000201801	ENSG00000285646	False
chr1	12616603	12617519	+	ENSG00000162496	ENSG00000162496_daRNA	DHRS3	True
chr1	12619202	12623940	+	ENSG00000272482	ENSG00000272482_daRNA	ENSG00000272482	True
chr1	15111815	15153618	-	ENSG00000171729	ENSG00000175147	TMEM51	False
chr1	15834479	15848604	-	ENSG00000065526	ENSG00000065526_daRNA	SPEN	True
chr1	16155211	16157329	+	ENSG00000142627	ENSG00000227959	EPHA2	False
chr1	16608624	16616015	+	ENSG00000219481	ENSG00000219481_daRNA	NBPF1	True
chr1	17437999	17440147	+	ENSG00000179051	ENSG00000179051_daRNA	RCC2	True
chr1	22052453	22053222	-	ENSG00000070831	ENSG00000070831_daRNA	CDC42	True
chr1	22142381	22175757	+	ENSG00000162552	ENSG00000162552_daRNA	WNT4	True
chr1	23558371	23562000	+	ENSG00000117318	ENSG00000117318_daRNA	ID3	True
chr1	23948709	23959641	-	ENSG00000189266	ENSG00000189266_daRNA	PNRC2	True
chr1	25816749	25820797	-	ENSG00000117640	ENSG00000228172	MTFR1L	False
chr1	26106752	26111667	-	ENSG00000175087	ENSG00000175087_daRNA	PDIK1L	True
chr1	26695024	26696705	-	ENSG00000117713	ENSG00000117713_daRNA	ARID1A	True
chr1	26900238	26946871	+	ENSG00000198746	ENSG00000090273	GPATCH3	False
chr1	28235660	28236481	-	ENSG00000130770	ENSG00000130770_daRNA	ATP5IF1	True
chr1	28239584	28247212	-	ENSG00000271398	ENSG00000271398_daRNA	ENSG00000271398	True
chr1	28239584	28260074	-	ENSG00000130766	ENSG00000130766_daRNA	SESN2	True
chr1	28736052	28737665	-	ENSG00000198492	ENSG00000198492_daRNA	YTHDF2	True
chr1	29235601	29237508	-	ENSG00000060656	ENSG00000060656_daRNA	PTPRU	True
chr1	30732469	30825767	-	ENSG00000223382	ENSG00000223382_daRNA	LINC01778	True
chr1	35192591	35193630	+	ENSG00000116560	ENSG00000116560_daRNA	SFPQ	True
chr1	35557473	35567274	+	ENSG00000142687	ENSG00000020129	KIAA0319L	False
chr1	37802945	37808208	-	ENSG00000197982	ENSG00000196449	C1orf122	False
chr1	38859210	38926504	+	ENSG00000116954	ENSG00000116954_daRNA	RRAGC	True
chr1	40493491	40509139	-	ENSG00000164002	ENSG00000164002_daRNA	EXO5	True
chr1	40691648	40771603	+	ENSG00000272145	ENSG00000066136	NFYC-AS1	False
chr1	42335387	42336035	+	ENSG00000198815	ENSG00000198815_daRNA	FOXJ3	True
chr1	42817122	42844991	+	ENSG00000177868	ENSG00000164010	SVBP	False
chr1	43164175	43270936	-	ENSG00000179178	ENSG00000117395	TMEM125	False
chr1	43991500	44031467	-	ENSG00000230615	ENSG00000196517	ENSG00000230615	False
chr1	45329163	45340893	-	ENSG00000132773	ENSG00000132781	TOE1	False
chr1	45339722	45340052	+	ENSG00000132781	ENSG00000132781_daRNA	MUTYH	True
chr1	45583239	45584667	-	ENSG00000132780	ENSG00000132780_daRNA	NASP	True
chr1	45687353	45688181	+	ENSG00000159592	ENSG00000159592_daRNA	GPBP1L1	True
chr1	46133089	46139068	+	ENSG00000117461	ENSG00000117461_daRNA	PIK3R3	True
chr1	51329654	51335324	+	ENSG00000085831	ENSG00000261664	TTC39A	False
chr1	51344515	51346851	+	ENSG00000085831	ENSG00000085831_daRNA	TTC39A	True
chr1	51518309	51561629	+	ENSG00000085832	ENSG00000227070	EPS15	False
chr1	52365443	52367865	+	ENSG00000154222	ENSG00000287078	CC2D1B	False
chr1	53945699	53946312	-	ENSG00000116212	ENSG00000116212_daRNA	LRRC42	True
chr1	54886584	54961843	+	ENSG00000116133	ENSG00000116133_daRNA	DHCR24	True
chr1	63320884	63323740	-	ENSG00000187140	ENSG00000187140_daRNA	FOXD3	True
chr1	66924856	66925204	-	ENSG00000198160	ENSG00000198160_daRNA	MIER1	True
chr1	67832303	68202987	+	ENSG00000172380	ENSG00000232284	GNG12	False
chr1	68496676	68538627	+	ENSG00000024526	ENSG00000234264	DEPDC1	False
chr1	84506300	84566194	+	ENSG00000174021	ENSG00000122432	GNG5	False
chr1	85276307	85277884	+	ENSG00000142867	ENSG00000142867_daRNA	BCL10	True
chr1	85464769	85465669	+	ENSG00000153904	ENSG00000153904_daRNA	DDAH1	True
chr1	89820175	89821792	-	ENSG00000171492	ENSG00000171492_daRNA	LRRC8D	True
chr1	98661192	98661872	-	ENSG00000162627	ENSG00000162627_daRNA	SNX7	True
chr1	100989623	101026088	-	ENSG00000233184	ENSG00000117543	ENSG00000233184	False
chr1	107055385	107057476	-	ENSG00000198890	ENSG00000198890_daRNA	PRMT6	True
chr1	108134043	108200849	-	ENSG00000280186	ENSG00000085491	ENSG00000280186	False
chr1	108199526	108200413	+	ENSG00000085491	ENSG00000085491_daRNA	SLC25A24	True
chr1	108661192	108662261	+	ENSG00000162639	ENSG00000162639_daRNA	HENMT1	True
chr1	108747229	108747403	-	ENSG00000116266	ENSG00000116266_daRNA	STXBP3	True
chr1	109087971	109090858	-	ENSG00000215717	ENSG00000273382	TMEM167B	False
chr1	109212532	109214373	-	ENSG00000031698	ENSG00000031698_daRNA	SARS1	True
chr1	109247718	109250006	-	ENSG00000143126	ENSG00000143126_daRNA	CELSR2	True
chr1	110407355	110416272	+	ENSG00000134248	ENSG00000134248_daRNA	LAMTOR5	True
chr1	111738608	111746691	+	ENSG00000197852	ENSG00000197852_daRNA	INKA2	True
chr1	111981351	111989941	-	ENSG00000231437	ENSG00000231437_daRNA	LINC01750	True
chr1	112619187	112619805	+	ENSG00000007341	ENSG00000007341_daRNA	ST7L	True
chr1	112619672	112620301	-	ENSG00000116489	ENSG00000116489_daRNA	CAPZA1	True
chr1	113904971	113905326	+	ENSG00000134262	ENSG00000134262_daRNA	AP4B1	True
chr1	113905201	113905679	-	ENSG00000118655	ENSG00000118655_daRNA	DCLRE1B	True
chr1	113926446	113930224	-	ENSG00000163349	ENSG00000163349_daRNA	HIPK1	True
chr1	113929324	113977869	+	ENSG00000235527	ENSG00000163349	HIPK1-AS1	False
chr1	114510961	114515924	+	ENSG00000197323	ENSG00000197323_daRNA	TRIM33	True
chr1	117928993	117929775	+	ENSG00000196505	ENSG00000196505_daRNA	GDAP2	True
chr1	119031216	119140654	-	ENSG00000231365	ENSG00000116874	WARS2-AS1	False
chr1	145823871	145824088	+	ENSG00000265491	ENSG00000265491_daRNA	RNF115	True
chr1	145824095	145824560	-	ENSG00000186141	ENSG00000186141_daRNA	POLR3C	True
chr1	145918717	145919516	-	ENSG00000211451	ENSG00000211451_daRNA	GNRHR2	True
chr1	147172541	147172744	+	ENSG00000131791	ENSG00000131791_daRNA	PRKAB2	True
chr1	147175351	147243050	-	ENSG00000131778	ENSG00000131781	CHD1L	False
chr1	150268435	150280913	+	ENSG00000117362	ENSG00000117362_daRNA	APH1A	True
chr1	150629315	150632168	+	ENSG00000143420	ENSG00000143420_daRNA	ENSA	True
chr1	150974954	150975534	+	ENSG00000143418	ENSG00000143418_daRNA	CERS2	True
chr1	151058864	151060396	+	ENSG00000197622	ENSG00000197622_daRNA	CDC42SE1	True
chr1	151068456	151071092	-	ENSG00000143458	ENSG00000143458_daRNA	GABPB2	True
chr1	151165948	151166554	-	ENSG00000163156	ENSG00000163156_daRNA	SCNM1	True
chr1	151280027	151281671	-	ENSG00000143373	ENSG00000143373_daRNA	ZNF687	True
chr1	151327105	151327545	+	ENSG00000143393	ENSG00000143393_daRNA	PI4KB	True
chr1	151347006	151347889	+	ENSG00000143390	ENSG00000143390_daRNA	RFX5	True
chr1	151762899	151771334	+	ENSG00000143436	ENSG00000143450	MRPL9	False
chr1	151830905	151856353	+	ENSG00000143365	ENSG00000143365_daRNA	RORC	True
chr1	151907144	151907621	+	ENSG00000159445	ENSG00000159445_daRNA	THEM4	True
chr1	151992766	151996124	+	ENSG00000197747	ENSG00000197747_daRNA	S100A10	True
chr1	152035277	152043266	+	ENSG00000163191	ENSG00000163191_daRNA	S100A11	True
chr1	153614834	153621685	+	ENSG00000189334	ENSG00000189334_daRNA	S100A14	True
chr1	153631438	153634397	-	ENSG00000160679	ENSG00000272030	CHTOP	False
chr1	153658449	153658867	-	ENSG00000143553	ENSG00000143553_daRNA	SNAPIN	True
chr1	153675250	153679210	-	ENSG00000169418	ENSG00000169418_daRNA	NPR1	True
chr1	153774019	153776120	-	ENSG00000143554	ENSG00000143554_daRNA	SLC27A3	True
chr1	153945992	153947241	+	ENSG00000198837	ENSG00000198837_daRNA	DENND4B	True
chr1	153959099	153968184	-	ENSG00000143578	ENSG00000143570	CREB3L4	False
chr1	153977172	153978903	+	ENSG00000143543	ENSG00000143543_daRNA	JTB	True
chr1	153977674	153977981	-	ENSG00000272654	ENSG00000272654_daRNA	ENSG00000272654	True
chr1	154220179	154271510	+	ENSG00000143612	ENSG00000143569	C1orf43	False
chr1	154220637	154221473	-	ENSG00000143569	ENSG00000143569_daRNA	UBAP2L	True
chr1	154961548	154962621	+	ENSG00000163348	ENSG00000163348_daRNA	PYGO2	True
chr1	154961782	154962002	-	ENSG00000271380	ENSG00000271380_daRNA	ENSG00000271380	True
chr1	154973918	154974653	+	ENSG00000160691	ENSG00000160691_daRNA	SHC1	True
chr1	154998750	155003644	-	ENSG00000160685	ENSG00000160685_daRNA	ZBTB7B	True
chr1	155045194	155051150	-	ENSG00000143537	ENSG00000143537_daRNA	ADAM15	True
chr1	155045194	155063972	-	ENSG00000243364	ENSG00000243364_daRNA	EFNA4	True
chr1	155208695	155213824	+	ENSG00000169231	ENSG00000173171	THBS3	False
chr1	155314796	155323799	-	ENSG00000160753	ENSG00000160753_daRNA	RUSC1	True
chr1	155562965	155563942	+	ENSG00000116539	ENSG00000116539_daRNA	ASH1L	True
chr1	155659443	155689000	-	ENSG00000132676	ENSG00000163374	DAP3	False
chr1	156212768	156213242	-	ENSG00000260238	ENSG00000260238_daRNA	PMF1-BGLAP	True
chr1	156728441	156728714	-	ENSG00000143303	ENSG00000143303_daRNA	RRNAD1	True
chr1	156747329	156750609	+	ENSG00000143321	ENSG00000143321_daRNA	HDGF	True
chr1	157073059	157073798	-	ENSG00000224520	ENSG00000224520_daRNA	KRT8P45	True
chr1	160261741	160263328	+	ENSG00000132716	ENSG00000228606	DCAF8	False
chr1	161132576	161133410	+	ENSG00000158796	ENSG00000158796_daRNA	DEDD	True
chr1	161153761	161154152	-	ENSG00000143222	ENSG00000143222_daRNA	UFC1	True
chr1	161748541	161750274	-	ENSG00000081721	ENSG00000081721_daRNA	DUSP12	True
chr1	167219833	167222319	-	ENSG00000143190	ENSG00000143190_daRNA	POU2F1	True
chr1	167936040	167936560	-	ENSG00000143164	ENSG00000143164_daRNA	DCAF6	True
chr1	169662007	169854080	+	ENSG00000171806	ENSG00000000460	METTL18	False
chr1	173799550	173824883	-	ENSG00000117593	ENSG00000120334	DARS2	False
chr1	173824186	173824653	+	ENSG00000120334	ENSG00000120334_daRNA	CENPL	True
chr1	173863902	173868735	-	ENSG00000185278	ENSG00000185278_daRNA	ZBTB37	True
chr1	178093734	178094104	+	ENSG00000224687	ENSG00000224687_daRNA	RASAL2-AS1	True
chr1	178723941	178725814	-	ENSG00000116191	ENSG00000116191_daRNA	RALGPS2	True
chr1	178725909	178920099	+	ENSG00000273062	ENSG00000273062_daRNA	RALGPS2-AS1	True
chr1	179881607	179882595	-	ENSG00000143337	ENSG00000272906	TOR1AIP1	False
chr1	179881609	179883019	-	ENSG00000143337	ENSG00000143337_daRNA	TOR1AIP1	True
chr1	181087801	181090003	-	ENSG00000162783	ENSG00000162783_daRNA	IER5	True
chr1	182391481	182476671	+	ENSG00000135821	ENSG00000135821_daRNA	GLUL	True
chr1	182837185	182839561	-	ENSG00000135829	ENSG00000287808	DHX9	False
chr1	183470801	183472905	-	ENSG00000116698	ENSG00000116698_daRNA	SMG7	True
chr1	183471292	183472477	+	ENSG00000232860	ENSG00000232860_daRNA	SMG7-AS1	True
chr1	193012250	193060080	-	ENSG00000116747	ENSG00000116750	RO60	False
chr1	200623896	200669907	-	ENSG00000260088	ENSG00000118197	DDX59-AS1	False
chr1	200669624	200694247	+	ENSG00000118197	ENSG00000118197_daRNA	DDX59	True
chr1	201380833	201399915	-	ENSG00000282221	ENSG00000159166	ENSG00000282221	False
chr1	201399492	201401556	+	ENSG00000159166	ENSG00000159166_daRNA	LAD1	True
chr1	201468548	201470079	+	ENSG00000174307	ENSG00000174307_daRNA	PHLDA3	True
chr1	201506856	201520589	+	ENSG00000159176	ENSG00000159176_daRNA	CSRP1	True
chr1	201735997	201739799	-	ENSG00000134369	ENSG00000134369_daRNA	NAV1	True
chr1	201829198	201876751	+	ENSG00000231871	ENSG00000231871_daRNA	IPO9-AS1	True
chr1	201954291	201983315	-	ENSG00000176393	ENSG00000176393_daRNA	RNPEP	True
chr1	202000094	202008277	-	ENSG00000163435	ENSG00000163435_daRNA	ELF3	True
chr1	202811841	202811976	-	ENSG00000228288	ENSG00000228288_daRNA	PCAT6	True
chr1	202861004	202861754	+	ENSG00000214796	ENSG00000214796_daRNA	TUBA5P	True
chr1	202861620	202861750	-	ENSG00000234996	ENSG00000234996_daRNA	ACTG1P25	True
chr1	202888906	202889591	+	ENSG00000183155	ENSG00000183155_daRNA	RABIF	True
chr1	203300515	203306648	-	ENSG00000159388	ENSG00000159388_daRNA	BTG2	True
chr1	204220731	204378165	-	ENSG00000226330	ENSG00000226330_daRNA	ENSG00000226330	True
chr1	204411382	204412415	+	ENSG00000158615	ENSG00000158615_daRNA	PPP1R15B	True
chr1	204494109	204495393	+	ENSG00000133056	ENSG00000133056_daRNA	PIK3C2B	True
chr1	205631564	205632689	+	ENSG00000158711	ENSG00000158711_daRNA	ELK4	True
chr1	205789094	205813748	-	ENSG00000286619	ENSG00000133065	ENSG00000286619	False
chr1	210231458	210233881	-	ENSG00000082497	ENSG00000082497_daRNA	SERTAD4	True
chr1	218344211	218345804	-	ENSG00000092969	ENSG00000092969_daRNA	TGFB2	True
chr1	222668013	222713210	-	ENSG00000162819	ENSG00000186063	BROX	False
chr1	226309217	226310099	+	ENSG00000183814	ENSG00000183814_daRNA	LIN9	True
chr1	228213180	228218220	+	ENSG00000162913	ENSG00000162913_daRNA	OBSCN-AS1	True
chr1	232950339	232951421	-	ENSG00000135778	ENSG00000135778_daRNA	NTPCR	True
chr1	233609120	233615054	-	ENSG00000135750	ENSG00000135750_daRNA	KCNK1	True
chr1	234357006	234365828	+	ENSG00000235605	ENSG00000236358	ENSG00000235605	False
chr1	234372969	234373650	-	ENSG00000168275	ENSG00000168275_daRNA	COA6	True
chr1	236523052	236524508	-	ENSG00000116977	ENSG00000223776	LGALS8	False
chr1	236523081	236523946	-	ENSG00000116977	ENSG00000116977_daRNA	LGALS8	True
chr1	241722926	241848128	-	ENSG00000174371	ENSG00000288723	EXO1	False
chr1	243255331	243256041	+	ENSG00000143702	ENSG00000143702_daRNA	CEP170	True
chr1	244835047	244843282	+	ENSG00000287601	ENSG00000287601_daRNA	ENSG00000287601	True
chr1	244864024	244865270	+	ENSG00000153187	ENSG00000153187_daRNA	HNRNPU	True
chr1	244969355	244970630	-	ENSG00000203666	ENSG00000203666_daRNA	EFCAB2	True
chr1	246723086	246724731	-	ENSG00000143653	ENSG00000143653_daRNA	SCCPDH	True
chr1	247331808	247334575	+	ENSG00000162714	ENSG00000162714_daRNA	ZNF496	True
chr1	248836482	248838630	-	ENSG00000171161	ENSG00000171161_daRNA	ZNF672	True
chr1	248858168	248919144	+	ENSG00000171163	ENSG00000171163_daRNA	ZNF692	True
chr10	133884	136011	-	ENSG00000015171	ENSG00000015171_daRNA	ZMYND11	True
chr10	987732	988434	+	ENSG00000205740	ENSG00000205740_daRNA	ENSG00000205740	True
chr10	1049095	1049538	+	ENSG00000067064	ENSG00000067064_daRNA	IDI1	True
chr10	1053748	1056702	-	ENSG00000047056	ENSG00000047056_daRNA	WDR37	True
chr10	5813016	5814635	+	ENSG00000057608	ENSG00000057608_daRNA	GDI2	True
chr10	7817460	7819263	-	ENSG00000165632	ENSG00000165632_daRNA	TAF3	True
chr10	8016636	8045619	-	ENSG00000107485	ENSG00000107485_daRNA	GATA3	True
chr10	8050450	8051861	-	ENSG00000232638	ENSG00000232638_daRNA	ENSG00000232638	True
chr10	12195965	12250589	+	ENSG00000165609	ENSG00000151465	NUDT5	False
chr10	13348419	13349007	+	ENSG00000086475	ENSG00000086475_daRNA	SEPHS1	True
chr10	14954097	14959937	-	ENSG00000197889	ENSG00000197889_daRNA	MEIG1	True
chr10	15095385	15097319	-	ENSG00000152464	ENSG00000176236	RPP38	False
chr10	17454187	17455497	+	ENSG00000148488	ENSG00000148488_daRNA	ST8SIA6	True
chr10	20781792	21174089	-	ENSG00000231920	ENSG00000231920_daRNA	NEBL-AS1	True
chr10	21174014	21175048	+	ENSG00000078114	ENSG00000231920	NEBL	False
chr10	22340422	22341487	+	ENSG00000272366	ENSG00000272366_daRNA	ENSG00000272366	True
chr10	25013270	25016975	-	ENSG00000185875	ENSG00000185875_daRNA	THNSL1	True
chr10	27110111	27155266	-	ENSG00000120539	ENSG00000136758	MASTL	False
chr10	28523600	28533012	-	ENSG00000095787	ENSG00000095787_daRNA	WAC	True
chr10	28532442	28532768	+	ENSG00000254635	ENSG00000254635_daRNA	WAC-AS1	True
chr10	32346716	32347170	+	ENSG00000120616	ENSG00000120616_daRNA	EPC1	True
chr10	33335069	33341901	+	ENSG00000099250	ENSG00000099250_daRNA	NRP1	True
chr10	34814815	34816388	+	ENSG00000148498	ENSG00000148498_daRNA	PARD3	True
chr10	35098006	35127020	-	ENSG00000095794	ENSG00000230534	CREM	False
chr10	37776526	37858106	-	ENSG00000236514	ENSG00000198105	ENSG00000236514	False
chr10	42638314	42645542	+	ENSG00000196693	ENSG00000285884	ZNF33B	False
chr10	43396252	43422098	+	ENSG00000169813	ENSG00000169813_daRNA	HNRNPF	True
chr10	43419823	43420910	-	ENSG00000230555	ENSG00000230555_daRNA	ENSG00000230555	True
chr10	43432507	43437059	-	ENSG00000243660	ENSG00000243660_daRNA	ZNF487	True
chr10	50305586	50625163	-	ENSG00000226200	ENSG00000198964	SGMS1-AS1	False
chr10	52230398	52314507	-	ENSG00000107984	ENSG00000236671	DKK1	False
chr10	52259991	52315111	-	ENSG00000107984	ENSG00000107984_daRNA	DKK1	True
chr10	52453094	52453543	+	ENSG00000231131	ENSG00000231131_daRNA	LNCAROD	True
chr10	60139959	60202907	+	ENSG00000151150	ENSG00000151150_daRNA	ANK3	True
chr10	63167221	63521850	-	ENSG00000272767	ENSG00000171988	JMJD1C-AS1	False
chr10	63167221	63521850	-	ENSG00000165476	ENSG00000171988	REEP3	False
chr10	68282660	68333049	-	ENSG00000096746	ENSG00000108187	HNRNPH3	False
chr10	72096032	72217134	-	ENSG00000166295	ENSG00000138303	ANAPC16	False
chr10	73168008	73168321	-	ENSG00000138286	ENSG00000138286_daRNA	FAM149B1	True
chr10	73495525	73520070	+	ENSG00000107758	ENSG00000221817	PPP3CB	False
chr10	73744230	73744794	-	ENSG00000176986	ENSG00000176986_daRNA	SEC24C	True
chr10	73769264	73772862	-	ENSG00000196968	ENSG00000279689	FUT11	False
chr10	75401519	75408982	+	ENSG00000165655	ENSG00000237149	ZNF503	False
chr10	77926441	77929823	+	ENSG00000151208	ENSG00000151208_daRNA	DLG5	True
chr10	79825911	79827565	+	ENSG00000225484	ENSG00000225484_daRNA	NUTM2B-AS1	True
chr10	80046860	80078912	-	ENSG00000133678	ENSG00000230091	TMEM254	False
chr10	86521090	86521190	+	ENSG00000062650	ENSG00000062650_daRNA	WAPL	True
chr10	87342395	87350999	+	ENSG00000223482	ENSG00000223482_daRNA	NUTM2A-AS1	True
chr10	87610163	87660003	-	ENSG00000198682	ENSG00000196566	PAPSS2	False
chr10	87658448	87660929	-	ENSG00000198682	ENSG00000198682_daRNA	PAPSS2	True
chr10	87863354	87863625	+	ENSG00000227268	ENSG00000227268_daRNA	KLLN	True
chr10	88582977	88584527	+	ENSG00000184719	ENSG00000184719_daRNA	RNLS	True
chr10	88990531	89017059	+	ENSG00000107796	ENSG00000026103	ACTA2	False
chr10	88991339	88991725	-	ENSG00000026103	ENSG00000026103_daRNA	FAS	True
chr10	93482355	93496611	+	ENSG00000138119	ENSG00000138119_daRNA	MYOF	True
chr10	95732976	96090250	-	ENSG00000188649	ENSG00000226688	CC2D2B	False
chr10	96129255	96129997	-	ENSG00000177853	ENSG00000177853_daRNA	ZNF518A	True
chr10	97497896	97498923	+	ENSG00000155229	ENSG00000155229_daRNA	MMS19	True
chr10	97498423	97499498	-	ENSG00000165886	ENSG00000165886_daRNA	UBTD1	True
chr10	97849295	97849843	+	ENSG00000227356	ENSG00000227356_daRNA	LINC00866	True
chr10	99620439	99621279	-	ENSG00000260475	ENSG00000260475_daRNA	ENSG00000260475	True
chr10	99732127	99732511	-	ENSG00000119929	ENSG00000119929_daRNA	CUTC	True
chr10	100912342	100913347	-	ENSG00000119906	ENSG00000119906_daRNA	SLF2	True
chr10	100987367	100994403	+	ENSG00000055950	ENSG00000107815	MRPL43	False
chr10	101067064	101067557	-	ENSG00000107821	ENSG00000107821_daRNA	KAZALD1	True
chr10	102417726	102421102	-	ENSG00000107872	ENSG00000107872_daRNA	FBXL15	True
chr10	102450641	102456291	+	ENSG00000120055	ENSG00000120055_daRNA	C10orf95	True
chr10	102643011	102644983	-	ENSG00000171206	ENSG00000171206_daRNA	TRIM8	True
chr10	102643929	102644479	+	ENSG00000272933	ENSG00000272933_daRNA	ENSG00000272933	True
chr10	102854272	102901899	+	ENSG00000282772	ENSG00000270316	ENSG00000282772	False
chr10	103192794	103194906	+	ENSG00000076685	ENSG00000076685_daRNA	NT5C2	True
chr10	103367876	103368615	-	ENSG00000148835	ENSG00000148835_daRNA	TAF5	True
chr10	110869868	110872233	-	ENSG00000150593	ENSG00000203497	PDCD4	False
chr10	112424428	112447572	-	ENSG00000151532	ENSG00000023041	VTI1A	False
chr10	114820517	114822946	-	ENSG00000151553	ENSG00000151553_daRNA	FAM160B1	True
chr10	116272443	116272557	+	ENSG00000151892	ENSG00000151892_daRNA	GFRA1	True
chr10	116274270	116281071	+	ENSG00000151892	ENSG00000285587	GFRA1	False
chr10	116849499	116911788	+	ENSG00000165868	ENSG00000188316	HSPA12A	False
chr10	118046592	118046891	-	ENSG00000177640	ENSG00000177640_daRNA	CASC2	True
chr10	119080221	119081298	+	ENSG00000107581	ENSG00000107581_daRNA	EIF3A	True
chr10	121740424	121928492	-	ENSG00000226864	ENSG00000107669	ATE1-AS1	False
chr10	121974882	121977303	+	ENSG00000107672	ENSG00000107672_daRNA	NSMCE4A	True
chr10	125160982	125161713	+	ENSG00000175029	ENSG00000175029_daRNA	CTBP2	True
chr10	125161062	125162786	-	ENSG00000282787	ENSG00000282787_daRNA	ENSG00000282787	True
chr10	125895850	125896564	+	ENSG00000089876	ENSG00000089876_daRNA	DHX32	True
chr10	132185849	132186947	+	ENSG00000235010	ENSG00000235010_daRNA	ENSG00000235010	True
chr10	133308914	133313162	+	ENSG00000130640	ENSG00000198546	TUBGCP2	False
chr11	207429	208688	-	ENSG00000177963	ENSG00000177963_daRNA	RIC8A	True
chr11	534720	537526	+	ENSG00000174775	ENSG00000174775_daRNA	HRAS	True
chr11	694686	695428	+	ENSG00000177030	ENSG00000177030_daRNA	DEAF1	True
chr11	706715	706962	-	ENSG00000177106	ENSG00000177106_daRNA	EPS8L2	True
chr11	797743	798956	+	ENSG00000177542	ENSG00000177542_daRNA	SLC25A22	True
chr11	804447	808422	+	ENSG00000177595	ENSG00000177595_daRNA	PIDD1	True
chr11	817865	833390	-	ENSG00000177697	ENSG00000177697_daRNA	CD151	True
chr11	832765	832952	+	ENSG00000255108	ENSG00000255108_daRNA	ENSG00000255108	True
chr11	1572271	1573046	-	ENSG00000233930	ENSG00000233930_daRNA	KRTAP5-AS1	True
chr11	1753820	1762711	+	ENSG00000250644	ENSG00000250644_daRNA	ENSG00000250644	True
chr11	2328749	2377992	-	ENSG00000110651	ENSG00000238184	CD81	False
chr11	3855163	3855702	+	ENSG00000228661	ENSG00000228661_daRNA	STIM1-AS1	True
chr11	7596407	7597775	-	ENSG00000166387	ENSG00000166387_daRNA	PPFIBP2	True
chr11	8964442	8964932	-	ENSG00000254860	ENSG00000254860_daRNA	TMEM9B-AS1	True
chr11	17013145	17013998	+	ENSG00000166689	ENSG00000166689_daRNA	PLEKHA7	True
chr11	18322198	18322489	-	ENSG00000110768	ENSG00000110768_daRNA	GTF2H1	True
chr11	19241307	19255305	+	ENSG00000129173	ENSG00000129173_daRNA	E2F8	True
chr11	22625509	22813055	+	ENSG00000183161	ENSG00000148935	FANCF	False
chr11	22829380	22945393	+	ENSG00000198168	ENSG00000246225	SVIP	False
chr11	34049967	34052132	-	ENSG00000135387	ENSG00000286626	CAPRIN1	False
chr11	45146429	45147182	-	ENSG00000019485	ENSG00000019485_daRNA	PRDM11	True
chr11	45796261	45804281	-	ENSG00000181830	ENSG00000181830_daRNA	SLC35C1	True
chr11	46603323	46617893	-	ENSG00000175224	ENSG00000175224_daRNA	ATG13	True
chr11	47191543	47214840	-	ENSG00000134574	ENSG00000134574_daRNA	DDB2	True
chr11	47552465	47565457	+	ENSG00000149187	ENSG00000149187_daRNA	CELF1	True
chr11	47565520	47566138	-	ENSG00000110536	ENSG00000110536_daRNA	PTPMT1	True
chr11	57711968	57712582	+	ENSG00000156603	ENSG00000156603_daRNA	MED19	True
chr11	58578107	58578259	+	ENSG00000110031	ENSG00000110031_daRNA	LPXN	True
chr11	59130133	59143015	-	ENSG00000166801	ENSG00000245571	FAM111A	False
chr11	61161379	61197913	+	ENSG00000167987	ENSG00000167987_daRNA	VPS37C	True
chr11	61294310	61303699	+	ENSG00000167992	ENSG00000167992_daRNA	VWCE	True
chr11	61362032	61362361	+	ENSG00000162144	ENSG00000162144_daRNA	CYB561A3	True
chr11	61792676	61792911	+	ENSG00000134825	ENSG00000134825_daRNA	TMEM258	True
chr11	61792980	61867354	+	ENSG00000149485	ENSG00000134824	FADS1	False
chr11	61967294	61967794	+	ENSG00000167996	ENSG00000167996_daRNA	FTH1	True
chr11	62545999	62547699	+	ENSG00000124942	ENSG00000257058	AHNAK	False
chr11	62600710	62602131	+	ENSG00000149480	ENSG00000149480_daRNA	MTA2	True
chr11	62611722	62615116	+	ENSG00000149499	ENSG00000149489	EML3	False
chr11	62662817	62672255	-	ENSG00000204922	ENSG00000162194	UQCC3	False
chr11	62771121	62771569	-	ENSG00000162227	ENSG00000162227_daRNA	TAF6L	True
chr11	62805616	62806048	+	ENSG00000162231	ENSG00000162231_daRNA	NXF1	True
chr11	63838557	63839181	-	ENSG00000072518	ENSG00000072518_daRNA	MARK2	True
chr11	63985813	63986754	-	ENSG00000167770	ENSG00000167770_daRNA	OTUB1	True
chr11	64244479	64246943	-	ENSG00000256940	ENSG00000173457	PPP1R14B-AS1	False
chr11	64246320	64248210	+	ENSG00000173457	ENSG00000173457_daRNA	PPP1R14B	True
chr11	64247913	64252581	-	ENSG00000149782	ENSG00000149782_daRNA	PLCB3	True
chr11	64777875	64779242	+	ENSG00000168066	ENSG00000168066_daRNA	SF1	True
chr11	65013462	65014604	-	ENSG00000213465	ENSG00000213465_daRNA	ARL2	True
chr11	65117007	65118475	+	ENSG00000174276	ENSG00000174276_daRNA	ZNHIT2	True
chr11	65122177	65122617	-	ENSG00000149792	ENSG00000149792_daRNA	MRPL49	True
chr11	65174132	65181579	-	ENSG00000014216	ENSG00000014216_daRNA	CAPN1	True
chr11	65570058	65570460	+	ENSG00000260233	ENSG00000260233_daRNA	ZNRD2-AS1	True
chr11	65614688	65616050	-	ENSG00000197136	ENSG00000197136_daRNA	PCNX3	True
chr11	65855175	65859020	+	ENSG00000172757	ENSG00000172757_daRNA	CFL1	True
chr11	65859416	65861273	-	ENSG00000172732	ENSG00000172732_daRNA	MUS81	True
chr11	65899479	65900906	+	ENSG00000175592	ENSG00000175592_daRNA	FOSL1	True
chr11	66002176	66002731	-	ENSG00000175334	ENSG00000175334_daRNA	BANF1	True
chr11	66067278	66070856	-	ENSG00000175115	ENSG00000175115_daRNA	PACS1	True
chr11	66247642	66258407	-	ENSG00000174996	ENSG00000174996_daRNA	KLC2	True
chr11	66268207	66269386	-	ENSG00000174903	ENSG00000174903_daRNA	RAB1B	True
chr11	66480013	66509657	+	ENSG00000255517	ENSG00000254986	ENSG00000255517	False
chr11	66677449	66678986	+	ENSG00000173914	ENSG00000173914_daRNA	RBM4B	True
chr11	67054200	67057679	-	ENSG00000173156	ENSG00000173156_daRNA	RHOD	True
chr11	67317291	67317871	+	ENSG00000287851	ENSG00000287851_daRNA	ENSG00000287851	True
chr11	67464818	67477410	+	ENSG00000172663	ENSG00000172663_daRNA	TMEM134	True
chr11	67468174	67491154	+	ENSG00000172663	ENSG00000110711	TMEM134	False
chr11	67508418	67509137	+	ENSG00000167797	ENSG00000167797_daRNA	CDK2AP2	True
chr11	68839481	68840460	+	ENSG00000110090	ENSG00000110090_daRNA	CPT1A	True
chr11	69640442	69643834	-	ENSG00000110092	ENSG00000110092_daRNA	CCND1	True
chr11	70202823	70203889	-	ENSG00000168040	ENSG00000168040_daRNA	FADD	True
chr11	70269194	70271716	-	ENSG00000131626	ENSG00000131626_daRNA	PPFIA1	True
chr11	71251939	71253789	+	ENSG00000162105	ENSG00000162105_daRNA	SHANK2	True
chr11	72080331	72110782	+	ENSG00000137497	ENSG00000284922	NUMA1	False
chr11	72080331	72110782	+	ENSG00000137497	ENSG00000284922	NUMA1	False
chr11	72793833	72808004	+	ENSG00000214530	ENSG00000214530_daRNA	STARD10	True
chr11	73307235	73309361	-	ENSG00000110237	ENSG00000257038	ARHGEF17	False
chr11	73760314	73762114	+	ENSG00000175582	ENSG00000175582_daRNA	RAB6A	True
chr11	73787641	73788085	-	ENSG00000175581	ENSG00000175581_daRNA	MRPL48	True
chr11	73876699	73931114	+	ENSG00000181924	ENSG00000175575	COA4	False
chr11	74490519	74493724	-	ENSG00000254837	ENSG00000175536	ENSG00000254837	False
chr11	76441345	76445535	-	ENSG00000158636	ENSG00000158636_daRNA	EMSY	True
chr11	76782234	76783856	-	ENSG00000182704	ENSG00000182704_daRNA	TSKU	True
chr11	83286120	83423516	+	ENSG00000137500	ENSG00000255234	CCDC90B	False
chr11	83455012	85627922	-	ENSG00000254787	ENSG00000150672	ENSG00000254787	False
chr11	85810606	85811433	+	ENSG00000137501	ENSG00000137501_daRNA	SYTL2	True
chr11	86244356	86244969	-	ENSG00000074266	ENSG00000074266_daRNA	EED	True
chr11	94066973	94129493	-	ENSG00000110218	ENSG00000110218_daRNA	PANX1	True
chr11	100685425	100687930	-	ENSG00000165895	ENSG00000165895_daRNA	ARHGAP42	True
chr11	108008678	108009282	-	ENSG00000166266	ENSG00000288012	CUL5	False
chr11	111878981	111879541	+	ENSG00000255561	ENSG00000255561_daRNA	FDXACB1	True
chr11	114400030	114414203	+	ENSG00000180425	ENSG00000076053	C11orf71	False
chr11	118530670	118531041	+	ENSG00000255435	ENSG00000255435_daRNA	ENSG00000255435	True
chr11	118531041	118547280	+	ENSG00000255435	ENSG00000149582	ENSG00000255435	False
chr11	118544528	118572970	-	ENSG00000095139	ENSG00000118096	ARCN1	False
chr11	118791032	118791535	+	ENSG00000110367	ENSG00000110367_daRNA	DDX6	True
chr11	118791164	118791713	-	ENSG00000278376	ENSG00000278376_daRNA	ENSG00000278376	True
chr11	118925164	118958559	+	ENSG00000186174	ENSG00000110375	BCL9L	False
chr11	119096025	119108331	-	ENSG00000172375	ENSG00000172269	C2CD2L	False
chr11	119101494	119102060	+	ENSG00000172269	ENSG00000172269_daRNA	DPAGT1	True
chr11	124766498	124800706	-	ENSG00000245498	ENSG00000120458	ENSG00000245498	False
chr11	126294298	126304318	-	ENSG00000110063	ENSG00000255062	DCPS	False
chr11	134150113	134225454	-	ENSG00000151502	ENSG00000151503	VPS26B	False
chr12	389405	389572	-	ENSG00000120647	ENSG00000120647_daRNA	CCDC77	True
chr12	990556	991223	+	ENSG00000250132	ENSG00000250132_daRNA	ENSG00000250132	True
chr12	2792580	2795881	-	ENSG00000004478	ENSG00000004478_daRNA	FKBP4	True
chr12	2796877	2812902	-	ENSG00000111203	ENSG00000258325	ITFG2	False
chr12	2876924	2877223	+	ENSG00000111206	ENSG00000111206_daRNA	FOXM1	True
chr12	2957603	2960046	-	ENSG00000197905	ENSG00000197905_daRNA	TEAD4	True
chr12	6196203	6201256	-	ENSG00000010278	ENSG00000010278_daRNA	CD9	True
chr12	6375045	6391571	+	ENSG00000111319	ENSG00000111321	SCNN1A	False
chr12	6493356	6531955	+	ENSG00000111639	ENSG00000010292	MRPL51	False
chr12	6568372	6568921	+	ENSG00000111641	ENSG00000111641_daRNA	NOP2	True
chr12	6851293	6852367	-	ENSG00000111667	ENSG00000111667_daRNA	USP5	True
chr12	6943508	6944604	-	ENSG00000111678	ENSG00000272173	C12orf57	False
chr12	6943665	6944814	-	ENSG00000111678	ENSG00000111678_daRNA	C12orf57	True
chr12	9064350	9068054	+	ENSG00000214851	ENSG00000214851_daRNA	LINC00612	True
chr12	9448229	9448772	-	ENSG00000284634	ENSG00000284634_daRNA	ENSG00000284634	True
chr12	10722606	10725314	+	ENSG00000060138	ENSG00000060138_daRNA	YBX3	True
chr12	10845849	11171600	-	ENSG00000256537	ENSG00000275778	SMIM10L1	False
chr12	12696376	12696682	-	ENSG00000111276	ENSG00000111276_daRNA	CDKN1B	True
chr12	14567393	14624191	+	ENSG00000121316	ENSG00000256751	PLBD1	False
chr12	25958683	26064951	+	ENSG00000246695	ENSG00000246695_daRNA	RASSF8-AS1	True
chr12	27710401	27710822	+	ENSG00000256377	ENSG00000256377_daRNA	ENSG00000256377	True
chr12	28163298	28190738	-	ENSG00000123106	ENSG00000247934	CCDC91	False
chr12	31073253	31073860	+	ENSG00000245614	ENSG00000245614_daRNA	DDX11-AS1	True
chr12	31728997	31731193	+	ENSG00000151743	ENSG00000151743_daRNA	AMN1	True
chr12	31958993	31959778	-	ENSG00000174718	ENSG00000174718_daRNA	RESF1	True
chr12	32104117	32107528	-	ENSG00000151746	ENSG00000257530	BICD1	False
chr12	45991092	45991400	+	ENSG00000139218	ENSG00000139218_daRNA	SCAF11	True
chr12	46269050	46652574	+	ENSG00000111371	ENSG00000111371_daRNA	SLC38A1	True
chr12	46371483	46652574	+	ENSG00000134294	ENSG00000134294_daRNA	SLC38A2	True
chr12	46382685	46383965	-	ENSG00000257261	ENSG00000257261_daRNA	ENSG00000257261	True
chr12	47079603	47236662	+	ENSG00000139211	ENSG00000179715	AMIGO2	False
chr12	47758880	47759106	-	ENSG00000211584	ENSG00000211584_daRNA	SLC48A1	True
chr12	48105139	48146404	+	ENSG00000079387	ENSG00000152556	SENP1	False
chr12	48106079	48106277	-	ENSG00000152556	ENSG00000152556_daRNA	PFKM	True
chr12	48813785	48815424	-	ENSG00000167535	ENSG00000167535_daRNA	CACNB3	True
chr12	49127782	49188484	+	ENSG00000123416	ENSG00000258017	TUBA1B	False
chr12	51391429	51391736	+	ENSG00000139629	ENSG00000139629_daRNA	GALNT6	True
chr12	52191538	52223727	+	ENSG00000167767	ENSG00000167767_daRNA	KRT80	True
chr12	52213501	52223727	+	ENSG00000257137	ENSG00000257137_daRNA	LINC02874	True
chr12	52232520	52252186	+	ENSG00000257671	ENSG00000135480	KRT7-AS	False
chr12	52305239	52309160	+	ENSG00000287051	ENSG00000287051_daRNA	ENSG00000287051	True
chr12	52308350	52309160	+	ENSG00000257829	ENSG00000257829_daRNA	ENSG00000257829	True
chr12	52897187	52949954	-	ENSG00000111057	ENSG00000170421	KRT18	False
chr12	52901173	52904127	+	ENSG00000170421	ENSG00000170421_daRNA	KRT8	True
chr12	53045250	53054213	-	ENSG00000111077	ENSG00000111077_daRNA	TNS2	True
chr12	53054248	53064370	+	ENSG00000257337	ENSG00000257337_daRNA	ENSG00000257337	True
chr12	53180925	53181055	-	ENSG00000139651	ENSG00000139651_daRNA	ZNF740	True
chr12	53251528	53252016	-	ENSG00000182544	ENSG00000182544_daRNA	MFSD5	True
chr12	53298655	53300314	-	ENSG00000139637	ENSG00000257605	MYG1	False
chr12	53500186	53501537	-	ENSG00000139546	ENSG00000139546_daRNA	TARBP2	True
chr12	53935329	53939851	-	ENSG00000123364	ENSG00000123364_daRNA	HOXC13	True
chr12	53974857	53976416	+	ENSG00000228630	ENSG00000228630_daRNA	HOTAIR	True
chr12	55820960	55830824	-	ENSG00000182796	ENSG00000135392	TMEM198B	False
chr12	55927023	55927308	+	ENSG00000170473	ENSG00000170473_daRNA	PYM1	True
chr12	55927319	55954027	+	ENSG00000170473	ENSG00000065357	PYM1	False
chr12	56120201	56129262	-	ENSG00000139641	ENSG00000139641_daRNA	ESYT1	True
chr12	56150796	56158220	-	ENSG00000196465	ENSG00000257809	MYL6B	False
chr12	56158872	56160057	-	ENSG00000092841	ENSG00000092841_daRNA	MYL6	True
chr12	56188896	56202126	+	ENSG00000139613	ENSG00000139613_daRNA	SMARCC2	True
chr12	56189727	56202126	+	ENSG00000258199	ENSG00000258199_daRNA	ENSG00000258199	True
chr12	56300076	56317992	+	ENSG00000062485	ENSG00000257303	CS	False
chr12	56752161	56787790	+	ENSG00000198056	ENSG00000025423	PRIM1	False
chr12	57771900	57772200	+	ENSG00000037897	ENSG00000037897_daRNA	METTL1	True
chr12	62466397	62467289	-	ENSG00000061987	ENSG00000061987_daRNA	MON2	True
chr12	64221879	64229235	+	ENSG00000174206	ENSG00000174206_daRNA	C12orf66	True
chr12	64451591	64452901	-	ENSG00000183735	ENSG00000277895	TBK1	False
chr12	64779726	64781048	-	ENSG00000111490	ENSG00000111490_daRNA	TBC1D30	True
chr12	65169075	65170551	-	ENSG00000174106	ENSG00000174106_daRNA	LEMD3	True
chr12	68696807	68706359	-	ENSG00000233560	ENSG00000233560_daRNA	KRT8P39	True
chr12	68806477	68808847	-	ENSG00000135679	ENSG00000135679_daRNA	MDM2	True
chr12	69359625	69359984	-	ENSG00000127337	ENSG00000127337_daRNA	YEATS4	True
chr12	70242491	70243657	-	ENSG00000111596	ENSG00000111596_daRNA	CNOT2	True
chr12	70243002	70354993	+	ENSG00000257815	ENSG00000111596	PRANCR	False
chr12	71663001	71664312	+	ENSG00000133858	ENSG00000133858_daRNA	ZFC3H1	True
chr12	74538145	74538633	-	ENSG00000253719	ENSG00000257386	ATXN7L3B	False
chr12	76029569	76030758	-	ENSG00000257453	ENSG00000257453_daRNA	ENSG00000257453	True
chr12	76057804	76065531	+	ENSG00000187109	ENSG00000187109_daRNA	NAP1L1	True
chr12	79690676	79839845	+	ENSG00000177425	ENSG00000177425_daRNA	PAWR	True
chr12	82358528	82479239	+	ENSG00000133773	ENSG00000127720	CCDC59	False
chr12	82686495	82686906	+	ENSG00000286043	ENSG00000286043_daRNA	ENSG00000286043	True
chr12	89353221	89353960	-	ENSG00000286608	ENSG00000286608_daRNA	ENSG00000286608	True
chr12	89524594	89548005	+	ENSG00000257594	ENSG00000270344	GALNT4	False
chr12	89524594	89548005	+	ENSG00000139323	ENSG00000270344	POC1B	False
chr12	89524870	89540296	+	ENSG00000139323	ENSG00000139323_daRNA	POC1B	True
chr12	89709107	89710512	+	ENSG00000070961	ENSG00000070961_daRNA	ATP2B1	True
chr12	92144917	92146771	+	ENSG00000133639	ENSG00000133639_daRNA	BTG1	True
chr12	93542022	93571768	-	ENSG00000120833	ENSG00000246985	SOCS2	False
chr12	93565535	93571225	-	ENSG00000120833	ENSG00000120833_daRNA	SOCS2	True
chr12	93569814	93583487	+	ENSG00000246985	ENSG00000120833	SOCS2-AS1	False
chr12	93569814	93583487	+	ENSG00000246985	ENSG00000120833	SOCS2-AS1	False
chr12	98512973	98516422	-	ENSG00000120802	ENSG00000257167	TMPO	False
chr12	102836889	102958410	-	ENSG00000139352	ENSG00000171759	ASCL1	False
chr12	106247550	106252785	+	ENSG00000136026	ENSG00000136026_daRNA	CKAP4	True
chr12	106356975	106357955	-	ENSG00000013503	ENSG00000013503_daRNA	POLR3B	True
chr12	106495958	106774926	-	ENSG00000111785	ENSG00000257545	RIC8B	False
chr12	108561401	108565371	-	ENSG00000136003	ENSG00000136003_daRNA	ISCU	True
chr12	109097062	109097899	-	ENSG00000076248	ENSG00000076248_daRNA	UNG	True
chr12	109573255	109598125	+	ENSG00000139428	ENSG00000110921	MMAB	False
chr12	110501655	110533556	+	ENSG00000111237	ENSG00000151164	VPS29	False
chr12	111599498	111600256	+	ENSG00000204842	ENSG00000258099	ATXN2	False
chr12	113135873	113147825	+	ENSG00000111344	ENSG00000111344_daRNA	RASAL1	True
chr12	113185075	113185542	+	ENSG00000123064	ENSG00000123064_daRNA	DDX54	True
chr12	118375299	118376864	-	ENSG00000111707	ENSG00000111707_daRNA	SUDS3	True
chr12	120469561	120469850	+	ENSG00000111786	ENSG00000111786_daRNA	SRSF9	True
chr12	121792459	121797028	+	ENSG00000139725	ENSG00000139725_daRNA	RHOF	True
chr12	121800683	121802399	+	ENSG00000212694	ENSG00000212694_daRNA	LINC01089	True
chr12	121802929	121804569	-	ENSG00000139718	ENSG00000139718_daRNA	SETD1B	True
chr12	122019422	122021859	-	ENSG00000110987	ENSG00000110987_daRNA	BCL7A	True
chr12	122422557	122424485	+	ENSG00000130779	ENSG00000130779_daRNA	CLIP1	True
chr12	122834562	122836218	-	ENSG00000130787	ENSG00000130787_daRNA	HIP1R	True
chr12	123232914	123233436	+	ENSG00000051825	ENSG00000051825_daRNA	MPHOSPH9	True
chr12	123271274	123272287	+	ENSG00000111328	ENSG00000111328_daRNA	CDK2AP1	True
chr12	123363868	123366113	+	ENSG00000139697	ENSG00000256092	SBNO1	False
chr12	123972743	123973245	+	ENSG00000119242	ENSG00000119242_daRNA	CCDC92	True
chr12	124914995	124923497	+	ENSG00000150991	ENSG00000150991_daRNA	UBC	True
chr12	131827810	131830512	-	ENSG00000198598	ENSG00000198598_daRNA	MMP17	True
chr12	131893975	131896486	-	ENSG00000279283	ENSG00000279283_daRNA	ENSG00000279283	True
chr12	132687376	132687979	-	ENSG00000176894	ENSG00000176894_daRNA	PXMP2	True
chr12	132828516	132831496	+	ENSG00000090615	ENSG00000090615_daRNA	GOLGA3	True
chr13	20702130	20704178	-	ENSG00000172458	ENSG00000172458_daRNA	IL17D	True
chr13	20773279	20774452	+	ENSG00000150456	ENSG00000150456_daRNA	EEF1AKMT1	True
chr13	21176376	21176658	+	ENSG00000165480	ENSG00000165480_daRNA	SKA3	True
chr13	22859050	22916369	-	ENSG00000234685	ENSG00000262619	NUS1P2	False
chr13	23888842	23897263	+	ENSG00000027001	ENSG00000205861	MIPEP	False
chr13	24159873	24161622	-	ENSG00000182957	ENSG00000182957_daRNA	SPATA13	True
chr13	26221983	26222653	+	ENSG00000127870	ENSG00000127870_daRNA	RNF6	True
chr13	27450257	27450901	+	ENSG00000122033	ENSG00000122033_daRNA	MTIF3	True
chr13	27620373	27620742	+	ENSG00000139517	ENSG00000139517_daRNA	LNX2	True
chr13	27620529	27621350	-	ENSG00000186184	ENSG00000186184_daRNA	POLR1D	True
chr13	28136847	28139267	-	ENSG00000152520	ENSG00000152520_daRNA	PAN3	True
chr13	36999604	37001027	-	ENSG00000120699	ENSG00000120699_daRNA	EXOSC8	True
chr13	37000381	37000783	+	ENSG00000120697	ENSG00000120697_daRNA	ALG5	True
chr13	38050817	38350259	-	ENSG00000120686	ENSG00000223685	UFM1	False
chr13	42046078	42048935	-	ENSG00000102780	ENSG00000102780_daRNA	DGKH	True
chr13	47745736	48037968	-	ENSG00000136159	ENSG00000136143	NUDT15	False
chr13	48974988	48976161	-	ENSG00000102531	ENSG00000102531_daRNA	FNDC3A	True
chr13	49975130	49997426	-	ENSG00000204977	ENSG00000204977_daRNA	TRIM13	True
chr13	50124695	50128394	+	ENSG00000231607	ENSG00000231607_daRNA	DLEU2	True
chr13	51803838	51813832	+	ENSG00000102796	ENSG00000231856	DHRS12	False
chr13	52450169	52451212	+	ENSG00000136100	ENSG00000136100_daRNA	VPS36	True
chr13	77026767	77129717	+	ENSG00000005812	ENSG00000236051	FBXL3	False
chr13	79405902	79407635	+	ENSG00000139746	ENSG00000139746_daRNA	RBM26	True
chr13	97433451	97434169	+	ENSG00000286416	ENSG00000286416_daRNA	ENSG00000286416	True
chr13	110613082	110616353	-	ENSG00000213995	ENSG00000275880	NAXD	False
chr13	110715206	110715351	-	ENSG00000153487	ENSG00000153487_daRNA	ING1	True
chr13	112587564	112588466	+	ENSG00000126216	ENSG00000126216_daRNA	TUBGCP3	True
chr13	112964836	112969135	-	ENSG00000126217	ENSG00000126217_daRNA	MCF2L	True
chr13	113208270	113208772	+	ENSG00000126226	ENSG00000126226_daRNA	PCID2	True
chr13	113208669	113208961	-	ENSG00000139842	ENSG00000139842_daRNA	CUL4A	True
chr13	113490738	113491021	+	ENSG00000150401	ENSG00000150401_daRNA	DCUN1D2	True
chr14	21098837	21103722	+	ENSG00000165804	ENSG00000165804_daRNA	ZNF219	True
chr14	21383592	21391804	+	ENSG00000092201	ENSG00000092201_daRNA	SUPT16H	True
chr14	21476597	21499175	+	ENSG00000129472	ENSG00000092203	RAB2B	False
chr14	22871239	22872607	-	ENSG00000197324	ENSG00000197324_daRNA	LRP10	True
chr14	23094758	23095505	+	ENSG00000100813	ENSG00000100813_daRNA	ACIN1	True
chr14	23301403	23306219	+	ENSG00000235194	ENSG00000235194_daRNA	PPP1R3E	True
chr14	23567174	23568072	+	ENSG00000213983	ENSG00000213983_daRNA	AP1G2	True
chr14	23598836	23631947	-	ENSG00000100867	ENSG00000100867_daRNA	DHRS2	True
chr14	23938219	24052555	-	ENSG00000157326	ENSG00000215256	DHRS4	False
chr14	23938735	24036879	-	ENSG00000225766	ENSG00000225766_daRNA	DHRS4L1	True
chr14	24078662	24115010	-	ENSG00000100897	ENSG00000129535	DCAF11	False
chr14	24146683	24160660	+	ENSG00000100911	ENSG00000092098	PSME2	False
chr14	24188387	24199074	+	ENSG00000196497	ENSG00000196497_daRNA	IPO4	True
chr14	24195366	24199074	+	ENSG00000100926	ENSG00000100926_daRNA	TM9SF1	True
chr14	24213185	24213995	+	ENSG00000254505	ENSG00000254505_daRNA	CHMP4A	True
chr14	24232367	24232518	-	ENSG00000100938	ENSG00000100938_daRNA	GMPR2	True
chr14	24271213	24298846	+	ENSG00000100949	ENSG00000288044	RABGGTA	False
chr14	24442395	24446051	+	ENSG00000100445	ENSG00000100445_daRNA	SDR39U1	True
chr14	31025106	31130996	+	ENSG00000196792	ENSG00000100478	STRN3	False
chr14	34874343	34876459	+	ENSG00000198604	ENSG00000258738	BAZ1A	False
chr14	35045653	35046887	-	ENSG00000151327	ENSG00000151327_daRNA	FAM177A1	True
chr14	35121846	35277622	+	ENSG00000092020	ENSG00000100890	PPP2R3C	False
chr14	35122517	35122880	-	ENSG00000100890	ENSG00000100890_daRNA	PRORP	True
chr14	35404085	35405561	+	ENSG00000100906	ENSG00000100906_daRNA	NFKBIA	True
chr14	35819224	35826734	-	ENSG00000100916	ENSG00000100916_daRNA	BRMS1L	True
chr14	37172138	37173790	+	ENSG00000183032	ENSG00000183032_daRNA	SLC25A21	True
chr14	37595964	37596741	+	ENSG00000129514	ENSG00000129514_daRNA	FOXA1	True
chr14	39174885	39175880	-	ENSG00000100941	ENSG00000259083	PNN	False
chr14	44895216	44897570	-	ENSG00000179476	ENSG00000179476_daRNA	C14orf28	True
chr14	45253313	45275354	+	ENSG00000129534	ENSG00000129534_daRNA	MIS18BP1	True
chr14	49570984	49599164	-	ENSG00000165501	ENSG00000213741	LRR1	False
chr14	49598691	49598940	+	ENSG00000213741	ENSG00000213741_daRNA	RPS29	True
chr14	49891543	49893455	-	ENSG00000165527	ENSG00000165527_daRNA	ARF6	True
chr14	50312229	50312548	-	ENSG00000125375	ENSG00000125375_daRNA	DMAC2L	True
chr14	55050779	55052065	-	ENSG00000168175	ENSG00000168175_daRNA	MAPK1IP1L	True
chr14	55262222	55272075	-	ENSG00000178974	ENSG00000258413	FBXO34	False
chr14	57268604	57268924	+	ENSG00000070367	ENSG00000070367_daRNA	EXOC5	True
chr14	60240136	60249768	-	ENSG00000100614	ENSG00000100614_daRNA	PPM1A	True
chr14	60723190	60734741	+	ENSG00000100625	ENSG00000100625_daRNA	SIX4	True
chr14	61280747	61362339	+	ENSG00000182107	ENSG00000182107_daRNA	TMEM30B	True
chr14	61309830	61321644	-	ENSG00000027075	ENSG00000027075_daRNA	PRKCH	True
chr14	61322686	61362339	+	ENSG00000247287	ENSG00000247287_daRNA	ENSG00000247287	True
chr14	61681041	61695823	-	ENSG00000100644	ENSG00000258777	HIF1A	False
chr14	64449106	64505213	-	ENSG00000126804	ENSG00000089775	ZBTB1	False
chr14	64449106	64505213	-	ENSG00000126804	ENSG00000089775	ZBTB1	False
chr14	64503712	64533690	+	ENSG00000089775	ENSG00000126804	ZBTB25	False
chr14	64539576	64540740	+	ENSG00000259116	ENSG00000259116_daRNA	ENSG00000259116	True
chr14	64985677	64987028	-	ENSG00000257365	ENSG00000257365_daRNA	FNTB	True
chr14	65411172	65412544	-	ENSG00000033170	ENSG00000033170_daRNA	FUT8	True
chr14	67674322	67676125	+	ENSG00000100568	ENSG00000100568_daRNA	VTI1B	True
chr14	68977941	68979062	+	ENSG00000072110	ENSG00000072110_daRNA	ACTN1	True
chr14	69398299	69398595	-	ENSG00000029364	ENSG00000029364_daRNA	SLC39A9	True
chr14	69765517	69767683	-	ENSG00000100650	ENSG00000100650_daRNA	SRSF5	True
chr14	70808798	70815388	+	ENSG00000006432	ENSG00000006432_daRNA	MAP3K9	True
chr14	70906655	70907577	-	ENSG00000100731	ENSG00000100731_daRNA	PCNX1	True
chr14	71292729	71321882	-	ENSG00000197555	ENSG00000259146	SIPA1L1	False
chr14	73057926	73058774	-	ENSG00000119707	ENSG00000119707_daRNA	RBM25	True
chr14	73567954	73569487	-	ENSG00000119673	ENSG00000119673_daRNA	ACOT2	True
chr14	73590023	73592055	-	ENSG00000177465	ENSG00000177465_daRNA	ACOT4	True
chr14	73786100	73803787	+	ENSG00000156030	ENSG00000156030_daRNA	MIDEAS	True
chr14	73787258	73787421	-	ENSG00000259065	ENSG00000259065_daRNA	ENSG00000259065	True
chr14	73885393	73886785	-	ENSG00000119725	ENSG00000119725_daRNA	ZNF410	True
chr14	73949926	73963670	+	ENSG00000156050	ENSG00000119723	FAM161B	False
chr14	74018547	74019349	+	ENSG00000187097	ENSG00000187097_daRNA	ENTPD5	True
chr14	74493307	74494119	-	ENSG00000165898	ENSG00000165898_daRNA	ISCA2	True
chr14	77028086	77031572	+	ENSG00000119669	ENSG00000273729	IRF2BPL	False
chr14	77320435	77321032	+	ENSG00000009830	ENSG00000009830_daRNA	POMT2	True
chr14	77320883	77321253	-	ENSG00000100577	ENSG00000100577_daRNA	GSTZ1	True
chr14	77376689	77391497	+	ENSG00000100580	ENSG00000100583	TMED8	False
chr14	81219500	81219742	+	ENSG00000165417	ENSG00000165417_daRNA	GTF2A1	True
chr14	81221218	81222460	+	ENSG00000165417	ENSG00000273783	GTF2A1	False
chr14	88562759	88563443	-	ENSG00000100722	ENSG00000100722_daRNA	ZC3H14	True
chr14	91060333	91225632	+	ENSG00000100784	ENSG00000133943	RPS6KA5	False
chr14	91509589	91512576	+	ENSG00000100796	ENSG00000100796_daRNA	PPP4R3A	True
chr14	91835845	91846683	+	ENSG00000165929	ENSG00000165929_daRNA	TC2N	True
chr14	92040193	92040519	+	ENSG00000100815	ENSG00000100815_daRNA	TRIP11	True
chr14	92121490	92121969	+	ENSG00000183648	ENSG00000183648_daRNA	NDUFB1	True
chr14	92121826	92122375	-	ENSG00000165934	ENSG00000165934_daRNA	CPSF2	True
chr14	93184897	93185189	-	ENSG00000259066	ENSG00000259066_daRNA	ENSG00000259066	True
chr14	93332650	93333330	+	ENSG00000011114	ENSG00000011114_daRNA	BTBD7	True
chr14	96500846	96502780	-	ENSG00000090060	ENSG00000090060_daRNA	PAPOLA	True
chr14	96502089	96502382	+	ENSG00000260806	ENSG00000260806_daRNA	PAPOLA-DT	True
chr14	100018721	100019298	-	ENSG00000196405	ENSG00000196405_daRNA	EVL	True
chr14	100238300	100240027	-	ENSG00000100811	ENSG00000100811_daRNA	YY1	True
chr14	101796555	101810321	-	ENSG00000078304	ENSG00000259088	PPP2R5C	False
chr14	102139430	102139844	+	ENSG00000080824	ENSG00000080824_daRNA	HSP90AA1	True
chr14	103056781	103059390	+	ENSG00000198752	ENSG00000198752_daRNA	CDC42BPB	True
chr14	103331673	103334641	-	ENSG00000100664	ENSG00000100664_daRNA	EIF5	True
chr14	103521286	103523624	+	ENSG00000166165	ENSG00000166165_daRNA	CKB	True
chr14	104798495	104800950	-	ENSG00000179627	ENSG00000179627_daRNA	ZBTB42	True
chr14	104815693	104823867	+	ENSG00000279140	ENSG00000279140_daRNA	ENSG00000279140	True
chr14	105209286	105315589	-	ENSG00000179364	ENSG00000185024	PACS2	False
chr14	105301087	105307538	+	ENSG00000185024	ENSG00000185024_daRNA	BRF1	True
chr14	105491038	105491676	-	ENSG00000185347	ENSG00000185347_daRNA	TEDC1	True
chr15	29822226	29824080	+	ENSG00000104067	ENSG00000104067_daRNA	TJP1	True
chr15	30625598	30625710	-	ENSG00000285077	ENSG00000285077_daRNA	ARHGAP11B	True
chr15	33066909	33075019	+	ENSG00000248905	ENSG00000248905_daRNA	FMN1	True
chr15	34583003	34645330	+	ENSG00000215252	ENSG00000215252_daRNA	GOLGA8B	True
chr15	37100767	37100870	+	ENSG00000134138	ENSG00000134138_daRNA	MEIS2	True
chr15	40807086	40815084	+	ENSG00000104129	ENSG00000166140	DNAJC17	False
chr15	40835808	40844387	-	ENSG00000166145	ENSG00000261183	SPINT1	False
chr15	40835995	40844740	-	ENSG00000166145	ENSG00000166145_daRNA	SPINT1	True
chr15	40873805	40874583	+	ENSG00000104140	ENSG00000104140_daRNA	RHOV	True
chr15	43330319	43330672	+	ENSG00000168806	ENSG00000168806_daRNA	LCMT2	True
chr15	43785408	43793192	-	ENSG00000140264	ENSG00000140264_daRNA	SERF2	True
chr15	45586924	45587288	-	ENSG00000104164	ENSG00000104164_daRNA	BLOC1S6	True
chr15	48312353	48331856	-	ENSG00000128951	ENSG00000259488	DUT	False
chr15	50354245	50356323	+	ENSG00000285410	ENSG00000285410_daRNA	GABPB1-IT1	True
chr15	50354959	50372202	+	ENSG00000104064	ENSG00000244879	GABPB1	False
chr15	50889299	50909107	-	ENSG00000081014	ENSG00000081014_daRNA	AP4E1	True
chr15	51971427	51982679	+	ENSG00000166477	ENSG00000166477_daRNA	LEO1	True
chr15	52017170	52019506	-	ENSG00000069956	ENSG00000069956_daRNA	MAPK6	True
chr15	52679372	52679712	-	ENSG00000287500	ENSG00000287500_daRNA	ENSG00000287500	True
chr15	55318960	55355648	+	ENSG00000069974	ENSG00000069943	RAB27A	False
chr15	63046034	63049387	-	ENSG00000140416	ENSG00000259498	TPM1	False
chr15	63088968	63122406	-	ENSG00000103642	ENSG00000103642_daRNA	LACTB	True
chr15	63157296	63157905	+	ENSG00000185088	ENSG00000185088_daRNA	RPS27L	True
chr15	63600956	63601239	+	ENSG00000259248	ENSG00000259248_daRNA	USP3-AS1	True
chr15	65517367	65517938	+	ENSG00000074603	ENSG00000074603_daRNA	DPP8	True
chr15	67065083	67065602	+	ENSG00000259347	ENSG00000259347_daRNA	ENSG00000259347	True
chr15	67254416	67254786	+	ENSG00000103591	ENSG00000103591_daRNA	AAGAB	True
chr15	67290636	67521844	-	ENSG00000189227	ENSG00000259673	C15orf61	False
chr15	68271364	68277943	-	ENSG00000169018	ENSG00000169018_daRNA	FEM1B	True
chr15	68817701	68818221	+	ENSG00000140350	ENSG00000140350_daRNA	ANP32A	True
chr15	69396904	69415029	-	ENSG00000137807	ENSG00000259426	KIF23	False
chr15	71114236	71116247	-	ENSG00000187720	ENSG00000187720_daRNA	THSD4	True
chr15	72231521	72232197	+	ENSG00000067225	ENSG00000067225_daRNA	PKM	True
chr15	72375769	72377926	+	ENSG00000213614	ENSG00000213614_daRNA	HEXA	True
chr15	72376014	72376181	-	ENSG00000260339	ENSG00000260339_daRNA	HEXA-AS1	True
chr15	72407778	72475168	-	ENSG00000166233	ENSG00000261423	ARIH1	False
chr15	72472846	72474930	-	ENSG00000166233	ENSG00000166233_daRNA	ARIH1	True
chr15	72473815	72474330	+	ENSG00000261423	ENSG00000261423_daRNA	TMEM202-AS1	True
chr15	73220647	73222081	-	ENSG00000067141	ENSG00000067141_daRNA	NEO1	True
chr15	73908088	73926468	-	ENSG00000129038	ENSG00000129038_daRNA	LOXL1	True
chr15	73919093	73920302	+	ENSG00000261801	ENSG00000261801_daRNA	LOXL1-AS1	True
chr15	74179466	74212267	-	ENSG00000140481	ENSG00000137868	CCDC33	False
chr15	74956381	74957042	+	ENSG00000178718	ENSG00000178718_daRNA	RPP25	True
chr15	75355207	75368612	-	ENSG00000260274	ENSG00000140400	ENSG00000260274	False
chr15	75639808	75641223	+	ENSG00000177971	ENSG00000177971_daRNA	IMP3	True
chr15	75842420	75843936	-	ENSG00000140367	ENSG00000140367_daRNA	UBE2Q2	True
chr15	79923174	79924851	+	ENSG00000259332	ENSG00000259332_daRNA	ST20-MTHFS	True
chr15	80404110	80404350	+	ENSG00000259495	ENSG00000259495_daRNA	ENSG00000259495	True
chr15	80999013	81001510	-	ENSG00000140406	ENSG00000140406_daRNA	TLNRD1	True
chr15	82749704	82757078	+	ENSG00000286817	ENSG00000286817_daRNA	ENSG00000286817	True
chr15	82808233	82810215	-	ENSG00000156232	ENSG00000156232_daRNA	WHAMM	True
chr15	89334547	89335335	+	ENSG00000140521	ENSG00000140521_daRNA	POLG	True
chr15	89496478	89497152	+	ENSG00000140519	ENSG00000140519_daRNA	RHCG	True
chr15	90265436	90266151	-	ENSG00000182768	ENSG00000182768_daRNA	NGRN	True
chr15	90952239	90955225	-	ENSG00000166965	ENSG00000258384	RCCD1	False
chr15	91022181	91022835	+	ENSG00000184056	ENSG00000184056_daRNA	VPS33B	True
chr15	91852308	91854265	-	ENSG00000176463	ENSG00000176463_daRNA	SLCO3A1	True
chr15	92809477	92810354	+	ENSG00000185442	ENSG00000185442_daRNA	FAM174B	True
chr15	96329859	96330999	-	ENSG00000185551	ENSG00000185551_daRNA	NR2F2	True
chr15	98871568	98873982	-	ENSG00000140443	ENSG00000140443_daRNA	IGF1R	True
chr15	100878948	100879629	-	ENSG00000184254	ENSG00000184254_daRNA	ALDH1A3	True
chr15	101251774	101253025	+	ENSG00000131873	ENSG00000131873_daRNA	CHSY1	True
chr16	53107	53887	+	ENSG00000161980	ENSG00000161980_daRNA	POLR3K	True
chr16	71645	74682	+	ENSG00000007384	ENSG00000007384_daRNA	RHBDF1	True
chr16	229190	229671	+	ENSG00000007392	ENSG00000007392_daRNA	LUC7L	True
chr16	233802	234683	-	ENSG00000167930	ENSG00000167930_daRNA	FAM234A	True
chr16	587822	589453	-	ENSG00000197562	ENSG00000197562_daRNA	RAB40C	True
chr16	684500	698912	+	ENSG00000161999	ENSG00000161999_daRNA	JMJD8	True
chr16	704787	713317	+	ENSG00000127585	ENSG00000127585_daRNA	FBXL16	True
chr16	722582	726954	-	ENSG00000103253	ENSG00000162004	HAGHL	False
chr16	726955	728328	-	ENSG00000103253	ENSG00000103253_daRNA	HAGHL	True
chr16	1772810	1781708	+	ENSG00000074071	ENSG00000197774	MRPS34	False
chr16	1773150	1773470	-	ENSG00000197774	ENSG00000197774_daRNA	EME2	True
chr16	1795620	1827157	-	ENSG00000180185	ENSG00000063854	FAHD1	False
chr16	1971818	1972613	-	ENSG00000183751	ENSG00000183751_daRNA	TBL3	True
chr16	1984877	1985448	-	ENSG00000127554	ENSG00000127554_daRNA	GFER	True
chr16	1991650	1992207	-	ENSG00000127561	ENSG00000127561_daRNA	SYNGR3	True
chr16	2008359	2008578	+	ENSG00000167962	ENSG00000167962_daRNA	ZNF598	True
chr16	2201319	2205322	-	ENSG00000167965	ENSG00000167965_daRNA	MLST8	True
chr16	2268221	2273415	+	ENSG00000205937	ENSG00000205937_daRNA	RNPS1	True
chr16	2673117	2675390	+	ENSG00000260565	ENSG00000260565_daRNA	ERVK13-1	True
chr16	2737103	2752964	-	ENSG00000167978	ENSG00000167978_daRNA	SRRM2	True
chr16	2857736	2859262	+	ENSG00000005001	ENSG00000005001_daRNA	PRSS22	True
chr16	2968024	2980479	-	ENSG00000162073	ENSG00000127564	PAQR4	False
chr16	2979797	2982545	+	ENSG00000127564	ENSG00000127564_daRNA	PKMYT1	True
chr16	3004914	3007386	+	ENSG00000262362	ENSG00000262362_daRNA	ENSG00000262362	True
chr16	3014713	3020859	-	ENSG00000006327	ENSG00000006327_daRNA	TNFRSF12A	True
chr16	3024027	3027755	+	ENSG00000103145	ENSG00000131652	HCFC1R1	False
chr16	3058524	3060720	+	ENSG00000261971	ENSG00000261971_daRNA	MMP25-AS1	True
chr16	3263374	3264486	-	ENSG00000281005	ENSG00000281005_daRNA	LINC00921	True
chr16	4183413	4185331	+	ENSG00000263105	ENSG00000263105_daRNA	ENSG00000263105	True
chr16	4271942	4273329	+	ENSG00000090447	ENSG00000090447_daRNA	TFAP4	True
chr16	4802408	4803355	+	ENSG00000067836	ENSG00000067836_daRNA	ROGDI	True
chr16	4846665	4882401	+	ENSG00000140632	ENSG00000118900	GLYR1	False
chr16	8962723	8967349	+	ENSG00000187555	ENSG00000187555_daRNA	USP7	True
chr16	10743310	10744095	-	ENSG00000103274	ENSG00000103274_daRNA	NUBP1	True
chr16	11896717	11916640	+	ENSG00000103342	ENSG00000103342_daRNA	GSPT1	True
chr16	11976644	11977716	-	ENSG00000048471	ENSG00000048471_daRNA	SNX29	True
chr16	18925965	18937213	+	ENSG00000157106	ENSG00000157106_daRNA	SMG1	True
chr16	20899868	20925006	+	ENSG00000196678	ENSG00000102897	ERI2	False
chr16	21501805	21503860	+	ENSG00000180747	ENSG00000180747_daRNA	SMG1P3	True
chr16	22345936	22437165	-	ENSG00000237296	ENSG00000140743	SMG1P1	False
chr16	22437165	22437459	-	ENSG00000237296	ENSG00000237296_daRNA	SMG1P1	True
chr16	23452758	23457606	+	ENSG00000168434	ENSG00000260136	COG7	False
chr16	25257591	25260027	+	ENSG00000155592	ENSG00000155592_daRNA	ZKSCAN2	True
chr16	27313458	27314410	-	ENSG00000077238	ENSG00000077238_daRNA	IL4R	True
chr16	28537419	28538676	+	ENSG00000176046	ENSG00000176046_daRNA	NUPR1	True
chr16	28553915	28591790	+	ENSG00000275441	ENSG00000176476	ENSG00000275441	False
chr16	28822431	28823969	-	ENSG00000168488	ENSG00000275807	ATXN2L	False
chr16	28862634	28863760	-	ENSG00000178188	ENSG00000178188_daRNA	SH2B1	True
chr16	28974171	28974669	-	ENSG00000169682	ENSG00000169682_daRNA	SPNS1	True
chr16	29789030	29791176	-	ENSG00000079616	ENSG00000079616_daRNA	KIF22	True
chr16	29789030	29807919	-	ENSG00000103495	ENSG00000103495_daRNA	MAZ	True
chr16	29808636	29821252	-	ENSG00000013364	ENSG00000238045	MVP	False
chr16	29811461	29812179	+	ENSG00000238045	ENSG00000238045_daRNA	ENSG00000238045	True
chr16	29995380	29995715	+	ENSG00000149929	ENSG00000149929_daRNA	HIRIP3	True
chr16	29995715	30005793	+	ENSG00000149929	ENSG00000169592	HIRIP3	False
chr16	30061578	30065559	-	ENSG00000149925	ENSG00000149925_daRNA	ALDOA	True
chr16	30075755	30076462	-	ENSG00000149923	ENSG00000149923_daRNA	PPP4C	True
chr16	30183505	30184957	-	ENSG00000102879	ENSG00000261416	CORO1A	False
chr16	30335224	30335691	+	ENSG00000183604	ENSG00000183604_daRNA	SMG1P5	True
chr16	30354666	30360981	+	ENSG00000169217	ENSG00000169217_daRNA	CD2BP2	True
chr16	30355308	30355849	-	ENSG00000260219	ENSG00000260219_daRNA	CD2BP2-DT	True
chr16	30378137	30378240	-	ENSG00000180035	ENSG00000180035_daRNA	ZNF48	True
chr16	30534918	30535318	-	ENSG00000235560	ENSG00000235560_daRNA	ENSG00000235560	True
chr16	30571672	30572396	-	ENSG00000239791	ENSG00000239791_daRNA	ENSG00000239791	True
chr16	30585254	30590393	+	ENSG00000197162	ENSG00000197162_daRNA	ZNF785	True
chr16	30650391	30651407	-	ENSG00000156858	ENSG00000156858_daRNA	PRR14	True
chr16	30697707	30699058	-	ENSG00000080603	ENSG00000261840	SRCAP	False
chr16	30761601	30762322	+	ENSG00000196118	ENSG00000196118_daRNA	CCDC189	True
chr16	30786552	30821880	+	ENSG00000102870	ENSG00000102870_daRNA	ZNF629	True
chr16	30922845	30923071	+	ENSG00000260852	ENSG00000260852_daRNA	FBXL19-AS1	True
chr16	30956872	30958343	-	ENSG00000099381	ENSG00000099381_daRNA	SETD1A	True
chr16	31030190	31034050	-	ENSG00000103496	ENSG00000103496_daRNA	STX4	True
chr16	31073837	31074422	+	ENSG00000167394	ENSG00000167394_daRNA	ZNF668	True
chr16	31114943	31117892	-	ENSG00000103510	ENSG00000103510_daRNA	KAT8	True
chr16	31202094	31203386	+	ENSG00000103490	ENSG00000103490_daRNA	PYCARD	True
chr16	31454127	31459102	-	ENSG00000140691	ENSG00000140691_daRNA	ARMC5	True
chr16	31456711	31459736	-	ENSG00000140691	ENSG00000260267	ARMC5	False
chr16	48609131	48610859	+	ENSG00000102921	ENSG00000102921_daRNA	N4BP1	True
chr16	49855734	49856426	+	ENSG00000102935	ENSG00000102935_daRNA	ZNF423	True
chr16	54285604	54289568	+	ENSG00000177508	ENSG00000283689	IRX3	False
chr16	54286202	54290126	+	ENSG00000177508	ENSG00000177508_daRNA	IRX3	True
chr16	58392153	58392807	-	ENSG00000181938	ENSG00000276131	GINS3	False
chr16	58514889	58516087	-	ENSG00000103037	ENSG00000103037_daRNA	SETD6	True
chr16	58733910	59199395	+	ENSG00000125166	ENSG00000245768	GOT2	False
chr16	66565627	66605641	-	ENSG00000140931	ENSG00000140931_daRNA	CMTM3	True
chr16	66934402	66935351	-	ENSG00000172831	ENSG00000172831_daRNA	CES2	True
chr16	67000089	67001042	-	ENSG00000172824	ENSG00000172824_daRNA	CES4A	True
chr16	67159444	67159932	+	ENSG00000102871	ENSG00000102871_daRNA	TRADD	True
chr16	67159910	67160940	-	ENSG00000135722	ENSG00000135722_daRNA	FBXL8	True
chr16	67183749	67185849	+	ENSG00000196123	ENSG00000196123_daRNA	KIAA0895L	True
chr16	67237683	67272191	+	ENSG00000135723	ENSG00000135740	FHOD1	False
chr16	67268345	67279409	-	ENSG00000196155	ENSG00000196155_daRNA	PLEKHG4	True
chr16	67541254	67563378	-	ENSG00000102974	ENSG00000102974_daRNA	CTCF	True
chr16	67828157	67847811	-	ENSG00000102898	ENSG00000102901	NUTF2	False
chr16	68234776	68243858	+	ENSG00000103067	ENSG00000103067_daRNA	ESRP2	True
chr16	68644248	68646168	-	ENSG00000062038	ENSG00000260577	CDH3	False
chr16	69132352	69132646	+	ENSG00000168802	ENSG00000168802_daRNA	CHTF8	True
chr16	69330169	69331158	+	ENSG00000258429	ENSG00000258429_daRNA	PDF	True
chr16	69339294	69339772	+	ENSG00000213380	ENSG00000213380_daRNA	COG8	True
chr16	69565406	69566349	-	ENSG00000102908	ENSG00000102908_daRNA	NFAT5	True
chr16	71723180	71724230	+	ENSG00000040199	ENSG00000261513	PHLPP2	False
chr16	71808439	71885268	+	ENSG00000166747	ENSG00000224470	AP1G1	False
chr16	71895336	71896178	-	ENSG00000182149	ENSG00000182149_daRNA	IST1	True
chr16	72044289	72094431	-	ENSG00000140829	ENSG00000140830	DHX38	False
chr16	73047579	73048839	+	ENSG00000140836	ENSG00000140836_daRNA	ZFHX3	True
chr16	74290510	74297483	-	ENSG00000103035	ENSG00000103035_daRNA	PSMD7	True
chr16	74985124	74999839	-	ENSG00000186187	ENSG00000186187_daRNA	ZNRF1	True
chr16	75627474	75648643	-	ENSG00000166848	ENSG00000065427	TERF2IP	False
chr16	77190022	77191133	-	ENSG00000103111	ENSG00000103111_daRNA	MON1B	True
chr16	79676048	79809716	+	ENSG00000261390	ENSG00000260876	MAFTRR	False
chr16	80154979	80563354	-	ENSG00000168589	ENSG00000259867	DYNLRB2	False
chr16	81006552	81033114	+	ENSG00000103121	ENSG00000166451	CMC2	False
chr16	81006897	81007430	-	ENSG00000166451	ENSG00000166451_daRNA	CENPN	True
chr16	84116432	84117549	+	ENSG00000140943	ENSG00000140943_daRNA	MBTPS1	True
chr16	85556173	85556707	-	ENSG00000131149	ENSG00000131149_daRNA	GSE1	True
chr16	85798931	85799612	+	ENSG00000131148	ENSG00000131148_daRNA	EMC8	True
chr16	85799544	85800091	-	ENSG00000131143	ENSG00000131143_daRNA	COX4I1	True
chr16	88802576	88804617	-	ENSG00000167513	ENSG00000167513_daRNA	CDT1	True
chr16	88811538	88814150	+	ENSG00000198931	ENSG00000198931_daRNA	APRT	True
chr16	88856947	88857893	-	ENSG00000167515	ENSG00000167515_daRNA	TRAPPC2L	True
chr16	88940384	88949558	+	ENSG00000129993	ENSG00000129993_daRNA	CBFA2T3	True
chr16	89682508	89686910	-	ENSG00000185324	ENSG00000185324_daRNA	CDK10	True
chr16	89720898	89721426	-	ENSG00000158805	ENSG00000158805_daRNA	ZNF276	True
chr16	89866315	89874076	-	ENSG00000141002	ENSG00000141002_daRNA	TCF25	True
chr16	89919827	89922662	-	ENSG00000258947	ENSG00000259006	TUBB3	False
chr16	90018762	90019629	+	ENSG00000003249	ENSG00000003249_daRNA	DBNDD1	True
chr16	90019629	90044975	+	ENSG00000003249	ENSG00000141013	DBNDD1	False
chr17	1684471	1685148	+	ENSG00000174231	ENSG00000174231_daRNA	PRPF8	True
chr17	1711493	1717174	-	ENSG00000167716	ENSG00000186594	WDR81	False
chr17	2040955	2042692	-	ENSG00000262664	ENSG00000262664_daRNA	OVCA2	True
chr17	2336458	2337982	-	ENSG00000141258	ENSG00000141258_daRNA	SGSM2	True
chr17	2336547	2336739	+	ENSG00000167721	ENSG00000167721_daRNA	TSR1	True
chr17	3668170	3668812	+	ENSG00000213977	ENSG00000213977_daRNA	TAX1BP3	True
chr17	3723837	3724311	-	ENSG00000177602	ENSG00000177602_daRNA	HASPIN	True
chr17	4142606	4143168	+	ENSG00000074755	ENSG00000074755_daRNA	ZZEF1	True
chr17	4143030	4143612	-	ENSG00000167740	ENSG00000167740_daRNA	CYB5D2	True
chr17	4639069	4645312	+	ENSG00000161905	ENSG00000161905_daRNA	ALOX15	True
chr17	4669774	4704337	-	ENSG00000244184	ENSG00000141456	ENSG00000244184	False
chr17	4703893	4705527	+	ENSG00000141456	ENSG00000141456_daRNA	PELP1	True
chr17	4704338	4731647	-	ENSG00000161920	ENSG00000161920_daRNA	MED11	True
chr17	4739291	4746109	+	ENSG00000161921	ENSG00000161921_daRNA	CXCL16	True
chr17	4941225	4942100	-	ENSG00000108523	ENSG00000108523_daRNA	RNF167	True
chr17	4948710	4949177	+	ENSG00000108518	ENSG00000108518_daRNA	PFN1	True
chr17	4949061	4949321	-	ENSG00000108515	ENSG00000108515_daRNA	ENO3	True
chr17	4967544	4968150	+	ENSG00000091640	ENSG00000091640_daRNA	SPAG7	True
chr17	4968252	4975439	+	ENSG00000108509	ENSG00000108509_daRNA	CAMTA2	True
chr17	5419077	5419888	+	ENSG00000108559	ENSG00000108559_daRNA	NUP88	True
chr17	5419676	5420091	-	ENSG00000129197	ENSG00000129197_daRNA	RPAIN	True
chr17	5471254	5486811	-	ENSG00000167842	ENSG00000072849	MIS12	False
chr17	7217628	7220430	-	ENSG00000072778	ENSG00000072778_daRNA	ACADVL	True
chr17	7251739	7252053	+	ENSG00000175826	ENSG00000175826_daRNA	CTDNEP1	True
chr17	7304971	7308874	-	ENSG00000132507	ENSG00000132507_daRNA	EIF5A	True
chr17	7349746	7352006	-	ENSG00000213859	ENSG00000213859_daRNA	KCTD11	True
chr17	7435684	7436078	-	ENSG00000181284	ENSG00000181284_daRNA	TMEM102	True
chr17	7484263	7484694	-	ENSG00000181222	ENSG00000181222_daRNA	POLR2A	True
chr17	7581964	7584086	-	ENSG00000129255	ENSG00000233223	MPDU1	False
chr17	7581974	7583736	-	ENSG00000129255	ENSG00000129255_daRNA	MPDU1	True
chr17	7593200	7594418	+	ENSG00000129245	ENSG00000129245_daRNA	FXR2	True
chr17	7686680	7687440	+	ENSG00000141510	ENSG00000141510_daRNA	TP53	True
chr17	7857746	7862282	+	ENSG00000183011	ENSG00000182224	NAA38	False
chr17	8189491	8190908	+	ENSG00000196544	ENSG00000196544_daRNA	BORCS6	True
chr17	8247618	8270491	+	ENSG00000178971	ENSG00000178921	CTC1	False
chr17	17591428	17610485	+	ENSG00000133027	ENSG00000264666	PEMT	False
chr17	17674024	17682805	-	ENSG00000108557	ENSG00000108557_daRNA	RAI1	True
chr17	17836411	17843035	+	ENSG00000072310	ENSG00000072310_daRNA	SREBF1	True
chr17	18259889	18261300	-	ENSG00000177427	ENSG00000177427_daRNA	MIEF2	True
chr17	19334308	19378193	-	ENSG00000166484	ENSG00000108641	MAPK7	False
chr17	20155378	20156541	-	ENSG00000128487	ENSG00000128487_daRNA	SPECC1	True
chr17	21214176	21214629	-	ENSG00000235530	ENSG00000235530_daRNA	ENSG00000235530	True
chr17	28661938	28662198	+	ENSG00000132581	ENSG00000132581_daRNA	SDF2	True
chr17	28725897	28743455	+	ENSG00000160606	ENSG00000160602	TLCD1	False
chr17	28727258	28727739	+	ENSG00000160606	ENSG00000267729	TLCD1	False
chr17	28727936	28728971	-	ENSG00000160602	ENSG00000160602_daRNA	NEK8	True
chr17	28739321	28745251	-	ENSG00000076604	ENSG00000076604_daRNA	TRAF4	True
chr17	29369717	29390777	-	ENSG00000160551	ENSG00000264808	TAOK1	False
chr17	29566333	29567390	+	ENSG00000168792	ENSG00000168792_daRNA	ABHD15	True
chr17	29567821	29568514	-	ENSG00000167543	ENSG00000167543_daRNA	TP53I13	True
chr17	29929200	30108452	+	ENSG00000141298	ENSG00000176927	SSH2	False
chr17	31007923	31008758	-	ENSG00000266865	ENSG00000266865_daRNA	ENSG00000266865	True
chr17	31090787	31095450	-	ENSG00000196712	ENSG00000264107	NF1	False
chr17	34927859	34981078	-	ENSG00000005156	ENSG00000132141	LIG3	False
chr17	36495636	36543435	-	ENSG00000277161	ENSG00000278259	PIGW	False
chr17	36534335	36535020	+	ENSG00000278259	ENSG00000278259_daRNA	MYO19	True
chr17	36936195	36936785	+	ENSG00000277268	ENSG00000277268_daRNA	LHX1-DT	True
chr17	38256331	38264469	+	ENSG00000274487	ENSG00000274487_daRNA	NPEPPSP1	True
chr17	38703483	38703843	-	ENSG00000277969	ENSG00000277969_daRNA	ENSG00000277969	True
chr17	38869213	38915134	-	ENSG00000002834	ENSG00000002834_daRNA	LASP1	True
chr17	39401793	39406233	+	ENSG00000108306	ENSG00000266469	FBXL20	False
chr17	39687914	39730426	+	ENSG00000161395	ENSG00000141736	PGAP3	False
chr17	40442305	40443812	-	ENSG00000141753	ENSG00000141753_daRNA	IGFBP4	True
chr17	40648081	40650809	+	ENSG00000073584	ENSG00000073584_daRNA	SMARCE1	True
chr17	41786202	41788172	+	ENSG00000173801	ENSG00000173801_daRNA	JUP	True
chr17	42554608	42555212	+	ENSG00000266962	ENSG00000266962_daRNA	HSD17B1-AS1	True
chr17	43148368	43171037	-	ENSG00000188554	ENSG00000267002	NBR1	False
chr17	44175986	44187163	-	ENSG00000168591	ENSG00000168591_daRNA	TMUB2	True
chr17	44218800	44223265	+	ENSG00000108312	ENSG00000108312_daRNA	UBTF	True
chr17	44221401	44223710	+	ENSG00000108312	ENSG00000260793	UBTF	False
chr17	44315188	44318668	+	ENSG00000267750	ENSG00000267750_daRNA	RUNDC3A-AS1	True
chr17	45108959	45133354	-	ENSG00000181513	ENSG00000161714	ACBD4	False
chr17	45149120	45150561	-	ENSG00000186834	ENSG00000186834_daRNA	HEXIM1	True
chr17	45160700	45170040	+	ENSG00000224505	ENSG00000168517	ENSG00000224505	False
chr17	45245186	45251129	-	ENSG00000267278	ENSG00000233483	MAP3K14-AS1	False
chr17	45799390	45895680	-	ENSG00000186868	ENSG00000264589	MAPT	False
chr17	46193020	46196672	+	ENSG00000120071	ENSG00000120071_daRNA	KANSL1	True
chr17	46193429	46194048	-	ENSG00000214401	ENSG00000214401_daRNA	KANSL1-AS1	True
chr17	47891274	47896501	-	ENSG00000167182	ENSG00000167182_daRNA	SP2	True
chr17	48046883	48048602	-	ENSG00000082641	ENSG00000082641_daRNA	NFE2L1	True
chr17	48101108	48101947	+	ENSG00000108468	ENSG00000108468_daRNA	CBX1	True
chr17	48104674	48107809	-	ENSG00000002919	ENSG00000002919_daRNA	SNX11	True
chr17	48542659	48543538	-	ENSG00000230148	ENSG00000230148_daRNA	HOXB-AS1	True
chr17	48874860	48908983	-	ENSG00000159202	ENSG00000248278	UBE2Z	False
chr17	49710332	49789180	-	ENSG00000136504	ENSG00000121104	KAT7	False
chr17	50373026	50373220	+	ENSG00000108826	ENSG00000108826_daRNA	MRPL27	True
chr17	50867727	50868303	+	ENSG00000141232	ENSG00000141232_daRNA	TOB1	True
chr17	51260050	51261106	-	ENSG00000011260	ENSG00000011260_daRNA	UTP18	True
chr17	56833217	56834131	+	ENSG00000214226	ENSG00000214226_daRNA	C17orf67	True
chr17	56913792	56914531	+	ENSG00000121060	ENSG00000121060_daRNA	TRIM25	True
chr17	57255137	57256338	-	ENSG00000153944	ENSG00000153944_daRNA	MSI2	True
chr17	57954854	57964767	+	ENSG00000180891	ENSG00000180891_daRNA	CUEDC1	True
chr17	57988078	57989387	+	ENSG00000136451	ENSG00000136451_daRNA	VEZF1	True
chr17	58006354	58006674	+	ENSG00000136450	ENSG00000136450_daRNA	SRSF1	True
chr17	58006674	58008187	+	ENSG00000136450	ENSG00000279069	SRSF1	False
chr17	59106457	59118449	+	ENSG00000108395	ENSG00000108395_daRNA	TRIM37	True
chr17	59618554	59619854	-	ENSG00000141367	ENSG00000141367_daRNA	CLTC	True
chr17	59836734	59837635	-	ENSG00000062716	ENSG00000062716_daRNA	VMP1	True
chr17	59891944	59892380	+	ENSG00000108423	ENSG00000108423_daRNA	TUBD1	True
chr17	59892935	59893850	-	ENSG00000108443	ENSG00000108443_daRNA	RPS6KB1	True
chr17	60078724	60079699	+	ENSG00000068097	ENSG00000068097_daRNA	HEATR6	True
chr17	60078922	60079472	-	ENSG00000267416	ENSG00000267416_daRNA	HEATR6-DT	True
chr17	60087157	60088659	+	ENSG00000261040	ENSG00000261040_daRNA	WFDC21P	True
chr17	60392229	60392429	+	ENSG00000170832	ENSG00000170832_daRNA	USP32	True
chr17	60525996	60552881	+	ENSG00000062725	ENSG00000062725_daRNA	APPBP2	True
chr17	60599129	60600860	-	ENSG00000170836	ENSG00000170836_daRNA	PPM1D	True
chr17	61354764	61382837	-	ENSG00000266934	ENSG00000266934_daRNA	ENSG00000266934	True
chr17	61393458	61400440	-	ENSG00000121068	ENSG00000121068_daRNA	TBX2	True
chr17	61409573	61414932	+	ENSG00000267280	ENSG00000267280_daRNA	TBX2-AS1	True
chr17	62473721	62479085	-	ENSG00000146872	ENSG00000146872_daRNA	TLK2	True
chr17	62701315	62704600	-	ENSG00000265702	ENSG00000265702_daRNA	ENSG00000265702	True
chr17	62966210	63427698	+	ENSG00000283538	ENSG00000283538_daRNA	ENSG00000283538	True
chr17	63773597	63774057	-	ENSG00000198231	ENSG00000198231_daRNA	DDX42	True
chr17	63819433	63830012	-	ENSG00000087191	ENSG00000108592	PSMC5	False
chr17	63824080	63827430	+	ENSG00000108592	ENSG00000108592_daRNA	FTSJ3	True
chr17	64506289	64506863	-	ENSG00000258890	ENSG00000258890_daRNA	CEP95	True
chr17	64780906	64785631	+	ENSG00000215769	ENSG00000215769_daRNA	ARHGAP27P1-BPTFP1-KPNA2P3	True
chr17	66951320	66964375	-	ENSG00000075461	ENSG00000075461_daRNA	CACNG4	True
chr17	67244837	67245806	+	ENSG00000198265	ENSG00000266473	HELZ	False
chr17	67245489	67245803	+	ENSG00000198265	ENSG00000198265_daRNA	HELZ	True
chr17	68511299	68512320	-	ENSG00000108946	ENSG00000108946_daRNA	PRKAR1A	True
chr17	73190800	73193605	-	ENSG00000166685	ENSG00000166685_daRNA	COG1	True
chr17	74729803	74738373	-	ENSG00000172794	ENSG00000172794_daRNA	RAB37	True
chr17	74729803	74749253	-	ENSG00000109062	ENSG00000109062_daRNA	SLC9A3R1	True
chr17	75130883	75133043	+	ENSG00000125458	ENSG00000279035	NT5C	False
chr17	75515537	75516391	-	ENSG00000182173	ENSG00000182173_daRNA	TSEN54	True
chr17	75521151	75525483	-	ENSG00000073350	ENSG00000073350_daRNA	LLGL2	True
chr17	75779539	75780257	+	ENSG00000132475	ENSG00000132475_daRNA	H3-3B	True
chr17	75979166	75979394	-	ENSG00000261408	ENSG00000261408_daRNA	TEN1-CDK3	True
chr17	76072011	76077535	+	ENSG00000167881	ENSG00000167881_daRNA	SRP68	True
chr17	76726076	76726830	+	ENSG00000070495	ENSG00000070495_daRNA	JMJD6	True
chr17	76735865	76781449	+	ENSG00000161547	ENSG00000092931	SRSF2	False
chr17	76737333	76737890	-	ENSG00000092931	ENSG00000092931_daRNA	MFSD11	True
chr17	77283591	77286662	-	ENSG00000184640	ENSG00000184640_daRNA	SEPTIN9	True
chr17	78186727	78187358	+	ENSG00000167900	ENSG00000167900_daRNA	TK1	True
chr17	80206716	80220923	-	ENSG00000181045	ENSG00000181523	SLC26A11	False
chr17	80407480	80415377	-	ENSG00000173818	ENSG00000173818_daRNA	ENDOV	True
chr17	81239057	81239874	-	ENSG00000224877	ENSG00000224877_daRNA	NDUFAF8	True
chr17	81513617	81516408	+	ENSG00000184009	ENSG00000184009_daRNA	ACTG1	True
chr17	81514047	81527776	+	ENSG00000184009	ENSG00000229848	ACTG1	False
chr17	81514641	81519556	-	ENSG00000229848	ENSG00000229848_daRNA	ENSG00000229848	True
chr17	81868768	81876005	+	ENSG00000141522	ENSG00000141522_daRNA	ARHGDIA	True
chr17	81891586	81891759	-	ENSG00000141552	ENSG00000141552_daRNA	ANAPC11	True
chr17	82022892	82023839	-	ENSG00000169683	ENSG00000169683_daRNA	LRRC45	True
chr17	82022893	82032033	-	ENSG00000169750	ENSG00000169750_daRNA	RAC3	True
chr17	82047902	82051831	-	ENSG00000169727	ENSG00000169733	GPS1	False
chr17	82050691	82057470	+	ENSG00000169733	ENSG00000169727	RFNG	False
chr17	82104268	82109477	+	ENSG00000176155	ENSG00000176155_daRNA	CCDC57	True
chr17	82389210	82418637	-	ENSG00000169660	ENSG00000181396	HEXD	False
chr17	82458180	82490537	+	ENSG00000265458	ENSG00000141562	NARF-AS2	False
chr17	83051448	83056339	+	ENSG00000175711	ENSG00000175711_daRNA	B3GNTL1	True
chr18	657653	673578	+	ENSG00000176912	ENSG00000176890	TYMSOS	False
chr18	812410	813754	+	ENSG00000176105	ENSG00000176105_daRNA	YES1	True
chr18	3246407	3248765	-	ENSG00000101608	ENSG00000101608_daRNA	MYL12A	True
chr18	3246407	3262367	-	ENSG00000118680	ENSG00000118680_daRNA	MYL12B	True
chr18	3261667	3262133	+	ENSG00000264235	ENSG00000264235_daRNA	MYL12-AS1	True
chr18	3448739	3450029	-	ENSG00000177426	ENSG00000177426_daRNA	TGIF1	True
chr18	9134778	9137177	-	ENSG00000101745	ENSG00000101745_daRNA	ANKRD12	True
chr18	9474101	9475235	-	ENSG00000017797	ENSG00000017797_daRNA	RALBP1	True
chr18	9913466	9915006	-	ENSG00000101558	ENSG00000101558_daRNA	VAPA	True
chr18	12883891	12885254	+	ENSG00000175354	ENSG00000175354_daRNA	PTPN2	True
chr18	22699481	22933764	-	ENSG00000101773	ENSG00000265943	RBBP8	False
chr18	23132502	23135339	-	ENSG00000134508	ENSG00000134508_daRNA	CABLES1	True
chr18	34490402	34494447	-	ENSG00000134769	ENSG00000134769_daRNA	DTNA	True
chr18	35344055	35347881	+	ENSG00000172466	ENSG00000172466_daRNA	ZNF24	True
chr18	35497708	35498191	+	ENSG00000153391	ENSG00000153391_daRNA	INO80C	True
chr18	36129131	36129894	+	ENSG00000141424	ENSG00000141424_daRNA	SLC39A6	True
chr18	36129340	36130256	-	ENSG00000134759	ENSG00000134759_daRNA	ELP2	True
chr18	36186902	36187497	+	ENSG00000260552	ENSG00000260552_daRNA	COSMOC	True
chr18	46173202	46174869	-	ENSG00000152242	ENSG00000152242_daRNA	C18orf25	True
chr18	48950262	48950965	+	ENSG00000101665	ENSG00000101665_daRNA	SMAD7	True
chr18	54268346	54270028	-	ENSG00000101751	ENSG00000277324	POLI	False
chr18	63367228	63367547	-	ENSG00000267390	ENSG00000267390_daRNA	KDSR-DT	True
chr18	74590317	74598885	-	ENSG00000215421	ENSG00000264247	ZNF407	False
chr18	76360281	76492915	-	ENSG00000265778	ENSG00000265778_daRNA	ZNF516-AS1	True
chr18	76360281	76496417	-	ENSG00000275763	ENSG00000275763_daRNA	ZNF516-DT	True
chr19	490046	507833	-	ENSG00000141933	ENSG00000266933	TPGS1	False
chr19	567435	571582	-	ENSG00000172270	ENSG00000172270_daRNA	BSG	True
chr19	633025	634334	+	ENSG00000099821	ENSG00000099821_daRNA	POLRMT	True
chr19	676708	680458	-	ENSG00000070404	ENSG00000070404_daRNA	FSTL3	True
chr19	1241406	1244699	-	ENSG00000099624	ENSG00000099624_daRNA	ATP5F1D	True
chr19	1245890	1249559	-	ENSG00000167470	ENSG00000288704	MIDN	False
chr19	1246277	1251430	-	ENSG00000167470	ENSG00000167470_daRNA	MIDN	True
chr19	1267815	1269667	-	ENSG00000099622	ENSG00000099622_daRNA	CIRBP	True
chr19	1273822	1275788	-	ENSG00000228300	ENSG00000228300_daRNA	FAM174C	True
chr19	1428186	1440038	-	ENSG00000115268	ENSG00000115268_daRNA	RPS15	True
chr19	2096429	2099593	+	ENSG00000172081	ENSG00000099840	MOB3A	False
chr19	2164887	2165281	-	ENSG00000104885	ENSG00000104885_daRNA	DOT1L	True
chr19	2236490	2236824	+	ENSG00000104886	ENSG00000104886_daRNA	PLEKHJ1	True
chr19	2268490	2270820	-	ENSG00000104904	ENSG00000104904_daRNA	OAZ1	True
chr19	3538261	3574290	-	ENSG00000064961	ENSG00000161091	HMG20B	False
chr19	4246830	4247290	-	ENSG00000105248	ENSG00000105248_daRNA	YJU2	True
chr19	4716057	4716644	+	ENSG00000142002	ENSG00000142002_daRNA	DPP9	True
chr19	6737604	6740809	-	ENSG00000125733	ENSG00000125733_daRNA	TRIP10	True
chr19	8374373	8390685	-	ENSG00000185236	ENSG00000269386	RAB11B	False
chr19	9620980	9633864	+	ENSG00000171469	ENSG00000171469_daRNA	ZNF561	True
chr19	9621236	9621785	-	ENSG00000267106	ENSG00000267106_daRNA	ZNF561-AS1	True
chr19	9674303	9682664	+	ENSG00000171466	ENSG00000171466_daRNA	ZNF562	True
chr19	10333296	10336246	+	ENSG00000161847	ENSG00000161847_daRNA	RAVER1	True
chr19	10502858	10505565	+	ENSG00000079999	ENSG00000079999_daRNA	KEAP1	True
chr19	10835973	10836575	+	ENSG00000099203	ENSG00000099203_daRNA	TMED1	True
chr19	10928639	10929568	-	ENSG00000142444	ENSG00000142444_daRNA	TIMM29	True
chr19	11088896	11090356	-	ENSG00000130164	ENSG00000130164_daRNA	LDLR	True
chr19	11197688	11206561	+	ENSG00000197256	ENSG00000197256_daRNA	KANK2	True
chr19	11344684	11354944	+	ENSG00000105518	ENSG00000183401	TMEM205	False
chr19	11346301	11355981	-	ENSG00000105520	ENSG00000105520_daRNA	PLPPR2	True
chr19	11368123	11374935	-	ENSG00000173928	ENSG00000267277	SWSAP1	False
chr19	11505468	11521604	+	ENSG00000161914	ENSG00000161914_daRNA	ZNF653	True
chr19	12551116	12552716	+	ENSG00000249709	ENSG00000249709_daRNA	ZNF564	True
chr19	12734685	12737992	-	ENSG00000198356	ENSG00000198356_daRNA	GET3	True
chr19	13117580	13118767	-	ENSG00000160877	ENSG00000160877_daRNA	NACC1	True
chr19	13150384	13151704	-	ENSG00000160888	ENSG00000160888_daRNA	IER2	True
chr19	13152252	13152913	-	ENSG00000160888	ENSG00000287296	IER2	False
chr19	13809810	13817933	-	ENSG00000132003	ENSG00000132003_daRNA	ZSWIM4	True
chr19	13882355	13906516	-	ENSG00000132024	ENSG00000132024_daRNA	CC2D1A	True
chr19	13931187	13953392	-	ENSG00000132017	ENSG00000132000	DCAF15	False
chr19	14005867	14006770	+	ENSG00000132005	ENSG00000132005_daRNA	RFX1	True
chr19	14071689	14074256	-	ENSG00000141854	ENSG00000141854_daRNA	MISP3	True
chr19	14090324	14167085	+	ENSG00000141858	ENSG00000141858_daRNA	SAMD1	True
chr19	14118152	14167085	+	ENSG00000072062	ENSG00000072062_daRNA	PRKACA	True
chr19	14478122	14489900	+	ENSG00000123159	ENSG00000123159_daRNA	GIPC1	True
chr19	14518011	14529591	+	ENSG00000132002	ENSG00000132002_daRNA	DNAJB1	True
chr19	16074298	16077264	-	ENSG00000167460	ENSG00000167460_daRNA	TPM4	True
chr19	16173306	16173950	+	ENSG00000141977	ENSG00000141977_daRNA	CIB3	True
chr19	17488990	17511889	-	ENSG00000130313	ENSG00000269439	PGLS	False
chr19	18224280	18224592	+	ENSG00000105650	ENSG00000105650_daRNA	PDE4C	True
chr19	18280447	18283249	+	ENSG00000130522	ENSG00000130522_daRNA	JUND	True
chr19	18588563	18589069	-	ENSG00000006015	ENSG00000006015_daRNA	REX1BD	True
chr19	18919168	18919705	+	ENSG00000105669	ENSG00000105669_daRNA	COPE	True
chr19	18990888	19034023	-	ENSG00000105676	ENSG00000064607	ARMC6	False
chr19	19176903	19192591	-	ENSG00000064490	ENSG00000254901	RFXANK	False
chr19	19320509	19321086	-	ENSG00000129933	ENSG00000129933_daRNA	MAU2	True
chr19	27681072	27794005	-	ENSG00000267575	ENSG00000261824	ENSG00000267575	False
chr19	32390051	32406011	-	ENSG00000178904	ENSG00000178904_daRNA	DPY19L3	True
chr19	34171719	34173435	-	ENSG00000257103	ENSG00000257103_daRNA	LSM14A	True
chr19	34733311	34734488	-	ENSG00000197841	ENSG00000197841_daRNA	ZNF181	True
chr19	35113851	35116223	-	ENSG00000089356	ENSG00000089356_daRNA	FXYD3	True
chr19	35540738	35546029	-	ENSG00000105677	ENSG00000236144	TMEM147	False
chr19	35745070	35745600	+	ENSG00000267120	ENSG00000267120_daRNA	ENSG00000267120	True
chr19	36054137	36054897	+	ENSG00000161277	ENSG00000161277_daRNA	THAP8	True
chr19	36114550	36115468	+	ENSG00000105258	ENSG00000105258_daRNA	POLR2I	True
chr19	36115213	36115674	-	ENSG00000105254	ENSG00000105254_daRNA	TBCB	True
chr19	36214723	36215106	+	ENSG00000196357	ENSG00000196357_daRNA	ZNF565	True
chr19	36445119	36489902	-	ENSG00000267309	ENSG00000186017	ZNF566-AS1	False
chr19	36573070	36594708	+	ENSG00000186020	ENSG00000233527	ZNF529	False
chr19	37217351	37218145	-	ENSG00000188283	ENSG00000188283_daRNA	ZNF383	True
chr19	38286377	38291987	-	ENSG00000167642	ENSG00000167642_daRNA	SPINT2	True
chr19	38319136	38320260	-	ENSG00000099337	ENSG00000099337_daRNA	KCNK6	True
chr19	38402836	38403725	-	ENSG00000130244	ENSG00000130244_daRNA	FAM98C	True
chr19	38736228	38739852	+	ENSG00000182472	ENSG00000182472_daRNA	CAPN12	True
chr19	38831330	38832267	+	ENSG00000104823	ENSG00000104823_daRNA	ECH1	True
chr19	38838149	38842460	+	ENSG00000268083	ENSG00000268083_daRNA	ENSG00000268083	True
chr19	38850686	38853302	+	ENSG00000104824	ENSG00000104824_daRNA	HNRNPL	True
chr19	38899602	38899813	-	ENSG00000104825	ENSG00000104825_daRNA	NFKBIB	True
chr19	38930547	38930944	+	ENSG00000104835	ENSG00000104835_daRNA	SARS2	True
chr19	39390735	39391378	+	ENSG00000006712	ENSG00000006712_daRNA	PAF1	True
chr19	39405965	39407171	-	ENSG00000128016	ENSG00000128016_daRNA	ZFP36	True
chr19	40691514	40725784	-	ENSG00000086544	ENSG00000123815	ITPKC	False
chr19	40750492	40751067	-	ENSG00000077312	ENSG00000077312_daRNA	SNRPA	True
chr19	41354417	41364165	-	ENSG00000142046	ENSG00000123810	TMEM91	False
chr19	42264739	42268766	-	ENSG00000079432	ENSG00000079432_daRNA	CIC	True
chr19	42302098	42310814	+	ENSG00000079462	ENSG00000188368	PAFAH1B3	False
chr19	43532884	43533450	-	ENSG00000176472	ENSG00000176472_daRNA	ZNF575	True
chr19	43619538	43620487	+	ENSG00000131116	ENSG00000131116_daRNA	ZNF428	True
chr19	44847369	44847592	-	ENSG00000130202	ENSG00000130202_daRNA	NECTIN2	True
chr19	44890569	44903689	+	ENSG00000267282	ENSG00000130204	ENSG00000267282	False
chr19	45075628	45077005	+	ENSG00000170684	ENSG00000170684_daRNA	ZNF296	True
chr19	45091396	45148077	+	ENSG00000267348	ENSG00000104866	GEMIN7-AS1	False
chr19	45178238	45181059	-	ENSG00000189114	ENSG00000189114_daRNA	BLOC1S3	True
chr19	45406145	45406644	+	ENSG00000104881	ENSG00000104881_daRNA	PPP1R13L	True
chr19	45638510	45642831	+	ENSG00000125746	ENSG00000125746_daRNA	EML2	True
chr19	45639404	45642227	-	ENSG00000267757	ENSG00000267757_daRNA	EML2-AS1	True
chr19	45764785	45769806	+	ENSG00000177045	ENSG00000259605	SIX5	False
chr19	45768950	45772501	+	ENSG00000177045	ENSG00000177045_daRNA	SIX5	True
chr19	46731298	46733882	+	ENSG00000090372	ENSG00000090372_daRNA	STRN4	True
chr19	46746046	46776988	+	ENSG00000090372	ENSG00000181027	STRN4	False
chr19	46787363	46789100	+	ENSG00000105281	ENSG00000105281_daRNA	SLC1A5	True
chr19	47064187	47113776	-	ENSG00000142230	ENSG00000130749	SAE1	False
chr19	47230042	47248992	+	ENSG00000105327	ENSG00000105327_daRNA	BBC3	True
chr19	47256157	47257531	+	ENSG00000286669	ENSG00000286669_daRNA	ENSG00000286669	True
chr19	47607884	47608627	-	ENSG00000063169	ENSG00000063169_daRNA	BICRA	True
chr19	47728926	47730225	-	ENSG00000024422	ENSG00000024422_daRNA	EHD2	True
chr19	48169940	48170680	+	ENSG00000105486	ENSG00000105486_daRNA	LIG1	True
chr19	48255690	48258190	+	ENSG00000105483	ENSG00000105483_daRNA	CARD8	True
chr19	48262901	48271246	-	ENSG00000178150	ENSG00000178150_daRNA	ZNF114	True
chr19	48296457	48321971	-	ENSG00000142227	ENSG00000105479	EMP3	False
chr19	48465348	48469693	-	ENSG00000105443	ENSG00000268530	CYTH2	False
chr19	48952027	48955132	-	ENSG00000087088	ENSG00000087088_daRNA	BAX	True
chr19	49056302	49067450	+	ENSG00000283251	ENSG00000283251_daRNA	ENSG00000283251	True
chr19	49446298	49453497	-	ENSG00000161618	ENSG00000104872	ALDH16A1	False
chr19	49664619	49665960	+	ENSG00000126456	ENSG00000126456_daRNA	IRF3	True
chr19	49838639	49851676	-	ENSG00000104960	ENSG00000268006	PTOV1	False
chr19	49850735	49860744	+	ENSG00000268006	ENSG00000104960	PTOV1-AS1	False
chr19	49877355	49877839	-	ENSG00000104946	ENSG00000104946_daRNA	TBC1D17	True
chr19	49906825	49929763	-	ENSG00000169136	ENSG00000213024	ATF5	False
chr19	50050589	50066793	+	ENSG00000269091	ENSG00000204666	ENSG00000269091	False
chr19	50466785	50476848	-	ENSG00000161671	ENSG00000142530	EMC10	False
chr19	50804910	50805420	+	ENSG00000167747	ENSG00000167747_daRNA	C19orf48	True
chr19	53862544	53869232	-	ENSG00000179820	ENSG00000179820_daRNA	MYADM	True
chr19	54115419	54115754	+	ENSG00000105619	ENSG00000105619_daRNA	TFPT	True
chr19	54189468	54190268	+	ENSG00000125505	ENSG00000125505_daRNA	MBOAT7	True
chr19	54442127	54449428	-	ENSG00000167615	ENSG00000167615_daRNA	LENG8	True
chr19	55077608	55081473	-	ENSG00000131037	ENSG00000131037_daRNA	EPS8L1	True
chr19	55116420	55123169	+	ENSG00000125503	ENSG00000287170	PPP1R12C	False
chr19	55257664	55272063	+	ENSG00000105063	ENSG00000105063_daRNA	PPP6R1	True
chr19	55369449	55378244	+	ENSG00000095752	ENSG00000095752_daRNA	IL11	True
chr19	55383756	55385931	+	ENSG00000233493	ENSG00000233493_daRNA	TMEM238	True
chr19	55461222	55462385	+	ENSG00000063241	ENSG00000063241_daRNA	ISOC2	True
chr19	55599260	55599870	+	ENSG00000179943	ENSG00000179943_daRNA	FIZ1	True
chr19	55599630	55600530	-	ENSG00000171443	ENSG00000171443_daRNA	ZNF524	True
chr19	55653116	55654351	-	ENSG00000063244	ENSG00000063244_daRNA	U2AF2	True
chr19	56120473	56122999	+	ENSG00000142409	ENSG00000142409_daRNA	ZNF787	True
chr19	57267211	57280334	-	ENSG00000197714	ENSG00000267871	ZNF460	False
chr19	58326994	58342332	+	ENSG00000283103	ENSG00000182318	ENSG00000283103	False
chr19	58362583	58367593	+	ENSG00000268230	ENSG00000269054	ENSG00000268230	False
chr19	58380831	58387263	+	ENSG00000152475	ENSG00000152475_daRNA	ZNF837	True
chr19	58386823	58387264	+	ENSG00000266640	ENSG00000266640_daRNA	MIR4754	True
chr19	58519731	58521599	+	ENSG00000119574	ENSG00000119574_daRNA	ZBTB45	True
chr19	58552720	58564332	+	ENSG00000130724	ENSG00000130724_daRNA	CHMP2A	True
chr19	58558714	58564332	+	ENSG00000130725	ENSG00000130725_daRNA	UBE2M	True
chr19	58573335	58573516	-	ENSG00000213753	ENSG00000213753_daRNA	CENPBD1P1	True
chr2	264140	278283	+	ENSG00000035115	ENSG00000143727	SH3YL1	False
chr2	1625084	1626036	+	ENSG00000203635	ENSG00000203635_daRNA	ENSG00000203635	True
chr2	3519275	3523197	+	ENSG00000182551	ENSG00000235078	ADI1	False
chr2	9205428	9207789	-	ENSG00000151693	ENSG00000151693_daRNA	ASAP2	True
chr2	9423283	9423651	+	ENSG00000119185	ENSG00000119185_daRNA	ITGB1BP1	True
chr2	9842818	9843676	-	ENSG00000115750	ENSG00000115750_daRNA	TAF1B	True
chr2	10121666	10122571	-	ENSG00000171848	ENSG00000171848_daRNA	RRM2	True
chr2	11539818	11540073	-	ENSG00000196208	ENSG00000196208_daRNA	GREB1	True
chr2	12716075	12716220	+	ENSG00000286427	ENSG00000286427_daRNA	ENSG00000286427	True
chr2	18560381	18572082	+	ENSG00000240857	ENSG00000240857_daRNA	RDH14	True
chr2	24793075	24793343	-	ENSG00000138092	ENSG00000138092_daRNA	CENPO	True
chr2	27199587	27212958	-	ENSG00000138085	ENSG00000138074	ATRAID	False
chr2	27356855	27360255	+	ENSG00000115207	ENSG00000115207_daRNA	GTF3C2	True
chr2	27356999	27357544	-	ENSG00000234072	ENSG00000234072_daRNA	ENSG00000234072	True
chr2	27427343	27429023	-	ENSG00000115216	ENSG00000115216_daRNA	NRBP1	True
chr2	27663471	27694976	+	ENSG00000119760	ENSG00000163798	SUPT7L	False
chr2	28384409	28394672	-	ENSG00000075426	ENSG00000229951	FOSL2	False
chr2	28391884	28392626	-	ENSG00000075426	ENSG00000075426_daRNA	FOSL2	True
chr2	28894445	28895342	-	ENSG00000163811	ENSG00000163811_daRNA	WDR43	True
chr2	32010822	32012058	+	ENSG00000162959	ENSG00000162959_daRNA	MEMO1	True
chr2	32355874	32357869	-	ENSG00000115760	ENSG00000115760_daRNA	BIRC6	True
chr2	32945330	32948032	-	ENSG00000049323	ENSG00000049323_daRNA	LTBP1	True
chr2	37924872	37925404	-	ENSG00000115841	ENSG00000115841_daRNA	RMDN2	True
chr2	38073447	38231651	+	ENSG00000138061	ENSG00000232973	CYP1B1	False
chr2	38076154	38076501	-	ENSG00000232973	ENSG00000232973_daRNA	CYP1B1-AS1	True
chr2	38875770	38876011	+	ENSG00000163214	ENSG00000163214_daRNA	DHX57	True
chr2	39436917	39454741	+	ENSG00000011566	ENSG00000011566_daRNA	MAP4K3	True
chr2	42493982	42494909	-	ENSG00000057935	ENSG00000057935_daRNA	MTA3	True
chr2	43221686	43222016	-	ENSG00000287387	ENSG00000287387_daRNA	ENSG00000287387	True
chr2	43226065	43233454	+	ENSG00000152518	ENSG00000152518_daRNA	ZFP36L2	True
chr2	46293452	46297107	-	ENSG00000116016	ENSG00000116016_daRNA	EPAS1	True
chr2	46542521	46542736	+	ENSG00000250565	ENSG00000250565_daRNA	ATP6V1E2	True
chr2	46901870	46941855	-	ENSG00000068724	ENSG00000180398	TTC7A	False
chr2	46915933	46916157	+	ENSG00000180398	ENSG00000180398_daRNA	MCFD2	True
chr2	47175174	47178141	+	ENSG00000143933	ENSG00000143933_daRNA	CALM2	True
chr2	47368828	47370026	-	ENSG00000119888	ENSG00000119888_daRNA	EPCAM	True
chr2	53787009	53787146	-	ENSG00000068912	ENSG00000068912_daRNA	ERLEC1	True
chr2	54115277	54115793	-	ENSG00000170634	ENSG00000170634_daRNA	ACYP2	True
chr2	55231775	55232681	+	ENSG00000162994	ENSG00000162994_daRNA	CLHC1	True
chr2	55617934	55618370	+	ENSG00000275052	ENSG00000275052_daRNA	PPP4R3B	True
chr2	56184008	56384407	+	ENSG00000233251	ENSG00000233251_daRNA	ENSG00000233251	True
chr2	60940222	61018259	-	ENSG00000162928	ENSG00000162927	PEX13	False
chr2	61017225	61051990	+	ENSG00000162927	ENSG00000162928	PUS10	False
chr2	61179685	61180525	-	ENSG00000173209	ENSG00000173209_daRNA	AHSA2P	True
chr2	67123357	67397980	-	ENSG00000143971	ENSG00000236780	ETAA1	False
chr2	69960104	70103220	-	ENSG00000169564	ENSG00000179818	PCBP1	False
chr2	70087117	70087260	+	ENSG00000179818	ENSG00000179818_daRNA	PCBP1-AS1	True
chr2	71067520	71068534	-	ENSG00000124357	ENSG00000124357_daRNA	NAGK	True
chr2	71129936	71130416	+	ENSG00000124370	ENSG00000124370_daRNA	MCEE	True
chr2	73234012	73234566	-	ENSG00000135624	ENSG00000135624_daRNA	CCT7	True
chr2	73957970	73985128	-	ENSG00000187605	ENSG00000187605_daRNA	TET3	True
chr2	74442423	74455512	-	ENSG00000115274	ENSG00000115274_daRNA	INO80B	True
chr2	74472208	74472953	+	ENSG00000204822	ENSG00000204822_daRNA	MRPL53	True
chr2	74482215	74483073	+	ENSG00000135637	ENSG00000135637_daRNA	CCDC142	True
chr2	74502595	74504678	+	ENSG00000179528	ENSG00000257702	LBX2	False
chr2	74503147	74504675	+	ENSG00000179528	ENSG00000179528_daRNA	LBX2	True
chr2	74529441	74529775	+	ENSG00000115307	ENSG00000115307_daRNA	AUP1	True
chr2	74529706	74530515	-	ENSG00000115317	ENSG00000115317_daRNA	HTRA2	True
chr2	74532258	74555690	-	ENSG00000115325	ENSG00000115318	DOK1	False
chr2	74833393	74835229	-	ENSG00000159399	ENSG00000159399_daRNA	HK2	True
chr2	74957934	74958877	-	ENSG00000115350	ENSG00000115350_daRNA	POLE4	True
chr2	75710782	75728123	+	ENSG00000005436	ENSG00000286045	GCFC2	False
chr2	84969948	84971170	-	ENSG00000176407	ENSG00000176407_daRNA	KCMF1	True
chr2	85538101	85539521	-	ENSG00000168906	ENSG00000168906_daRNA	MAT2A	True
chr2	85578825	85592415	-	ENSG00000168899	ENSG00000168899_daRNA	VAMP5	True
chr2	85602462	85602856	+	ENSG00000168890	ENSG00000168890_daRNA	TMEM150A	True
chr2	86195155	86196046	+	ENSG00000132305	ENSG00000132305_daRNA	IMMT	True
chr2	88691129	88691673	+	ENSG00000172071	ENSG00000172071_daRNA	EIF2AK3	True
chr2	95165413	95165652	-	ENSG00000275111	ENSG00000275111_daRNA	ZNF2	True
chr2	95525973	95527766	+	ENSG00000272913	ENSG00000272913_daRNA	ENSG00000272913	True
chr2	96208403	96243353	+	ENSG00000084090	ENSG00000204685	STARD7	False
chr2	96815231	96816494	-	ENSG00000168763	ENSG00000168763_daRNA	CNNM3	True
chr2	96870384	96873360	+	ENSG00000168758	ENSG00000168758_daRNA	SEMA4C	True
chr2	98608515	98609181	-	ENSG00000115446	ENSG00000115446_daRNA	UNC50	True
chr2	99141485	99322741	+	ENSG00000135951	ENSG00000241962	TSGA10	False
chr2	100321512	100323193	+	ENSG00000170500	ENSG00000170500_daRNA	LONRF2	True
chr2	101387464	101390507	+	ENSG00000175874	ENSG00000175874_daRNA	CREG2	True
chr2	105337332	105337532	+	ENSG00000272994	ENSG00000272994_daRNA	C2orf49-DT	True
chr2	111118501	111122449	-	ENSG00000153094	ENSG00000153094_daRNA	BCL2L11	True
chr2	112580112	112584813	-	ENSG00000125611	ENSG00000125611_daRNA	CHCHD5	True
chr2	112645032	112646258	-	ENSG00000144136	ENSG00000144136_daRNA	SLC20A1	True
chr2	112645428	112645939	+	ENSG00000237753	ENSG00000237753_daRNA	ENSG00000237753	True
chr2	112764211	112827609	+	ENSG00000169607	ENSG00000169607_daRNA	CKAP2L	True
chr2	113843283	113891021	-	ENSG00000115091	ENSG00000115091_daRNA	ACTR3	True
chr2	127387509	127389404	+	ENSG00000169967	ENSG00000169967_daRNA	MAP3K2	True
chr2	127885963	127888781	+	ENSG00000144233	ENSG00000144233_daRNA	AMMECR1L	True
chr2	130341742	130342876	+	ENSG00000136710	ENSG00000136710_daRNA	CCDC115	True
chr2	130354841	130356477	-	ENSG00000072135	ENSG00000072135_daRNA	PTPN18	True
chr2	131492482	131505181	+	ENSG00000173272	ENSG00000173272_daRNA	MZT2A	True
chr2	135985176	136022593	+	ENSG00000115866	ENSG00000231890	DARS1	False
chr2	147930396	148021604	-	ENSG00000204406	ENSG00000115947	MBD5	False
chr2	152175534	152177570	+	ENSG00000115145	ENSG00000115145_daRNA	STAM2	True
chr2	152717648	152718620	+	ENSG00000196504	ENSG00000196504_daRNA	PRPF40A	True
chr2	154690628	154698133	-	ENSG00000162989	ENSG00000162989_daRNA	KCNJ3	True
chr2	156341814	156342242	+	ENSG00000153234	ENSG00000153234_daRNA	NR4A2	True
chr2	158456727	158458132	-	ENSG00000144283	ENSG00000144283_daRNA	PKP4	True
chr2	159318979	159616569	-	ENSG00000224152	ENSG00000123636	ENSG00000224152	False
chr2	159615951	159617081	+	ENSG00000123636	ENSG00000123636_daRNA	BAZ2B	True
chr2	160407049	160409279	+	ENSG00000153250	ENSG00000153250_daRNA	RBMS1	True
chr2	164840661	165208261	+	ENSG00000082438	ENSG00000236283	COBLL1	False
chr2	164841602	164963088	+	ENSG00000082438	ENSG00000082438_daRNA	COBLL1	True
chr2	169584129	169584741	-	ENSG00000138398	ENSG00000138398_daRNA	PPIG	True
chr2	171434217	171485052	+	ENSG00000123600	ENSG00000115827	METTL8	False
chr2	172480840	172556596	-	ENSG00000152256	ENSG00000225205	PDK1	False
chr2	173964877	173988815	+	ENSG00000172845	ENSG00000172845_daRNA	SP3	True
chr2	176629841	176637987	-	ENSG00000224577	ENSG00000224577_daRNA	LINC01117	True
chr2	177210545	177213195	-	ENSG00000170144	ENSG00000170144_daRNA	HNRNPA3	True
chr2	177263710	177265618	+	ENSG00000116044	ENSG00000116044_daRNA	NFE2L2	True
chr2	188291422	188293007	-	ENSG00000144366	ENSG00000144366_daRNA	GULP1	True
chr2	189784085	189877629	+	ENSG00000128699	ENSG00000064933	ORMDL1	False
chr2	190189735	190344193	-	ENSG00000151689	ENSG00000198130	INPP1	False
chr2	190534598	190535191	+	ENSG00000189362	ENSG00000189362_daRNA	NEMP2	True
chr2	191229165	191246172	-	ENSG00000128641	ENSG00000227542	MYO1B	False
chr2	191678423	191678565	-	ENSG00000173559	ENSG00000173559_daRNA	NABP1	True
chr2	196592775	196594688	+	ENSG00000138411	ENSG00000138411_daRNA	HECW2	True
chr2	197451470	197453893	-	ENSG00000115520	ENSG00000115520_daRNA	COQ10B	True
chr2	199457940	199459348	-	ENSG00000225953	ENSG00000225953_daRNA	SATB2-AS1	True
chr2	199955503	199955723	-	ENSG00000162972	ENSG00000162972_daRNA	MAIP1	True
chr2	200305049	200306432	-	ENSG00000196141	ENSG00000196141_daRNA	SPATS2L	True
chr2	200810165	200812508	-	ENSG00000082153	ENSG00000082153_daRNA	BZW1	True
chr2	200963263	201009102	+	ENSG00000115942	ENSG00000183308	ORC2	False
chr2	201642771	201643882	+	ENSG00000155755	ENSG00000155755_daRNA	TMEM237	True
chr2	202911860	202912485	-	ENSG00000138380	ENSG00000138380_daRNA	CARF	True
chr2	203238449	203239240	-	ENSG00000119004	ENSG00000119004_daRNA	CYP20A1	True
chr2	203327845	203328888	-	ENSG00000138443	ENSG00000138443_daRNA	ABI2	True
chr2	206085961	206086850	+	ENSG00000114933	ENSG00000114933_daRNA	INO80D	True
chr2	213151926	213153649	+	ENSG00000030419	ENSG00000030419_daRNA	IKZF2	True
chr2	215303664	215311970	-	ENSG00000138363	ENSG00000138363_daRNA	ATIC	True
chr2	218216106	218217640	-	ENSG00000163466	ENSG00000163466_daRNA	ARPC2	True
chr2	218322678	218323995	-	ENSG00000127838	ENSG00000127838_daRNA	PNKD	True
chr2	218398742	218399800	-	ENSG00000144579	ENSG00000144579_daRNA	CTDSP1	True
chr2	218658764	218663443	+	ENSG00000115568	ENSG00000074582	ZNF142	False
chr2	219176225	219185475	+	ENSG00000115649	ENSG00000144567	CNPPD1	False
chr2	219218033	219221673	+	ENSG00000115657	ENSG00000115657_daRNA	ABCB6	True
chr2	219543135	219544006	+	ENSG00000123989	ENSG00000123989_daRNA	CHPF	True
chr2	219570651	219575709	+	ENSG00000124006	ENSG00000124006_daRNA	OBSL1	True
chr2	226799804	226801373	+	ENSG00000169047	ENSG00000169047_daRNA	IRS1	True
chr2	226835335	226836373	-	ENSG00000144468	ENSG00000144468_daRNA	RHBDD1	True
chr2	229922009	229922405	-	ENSG00000153832	ENSG00000153832_daRNA	FBXO36	True
chr2	231463844	231465085	+	ENSG00000115053	ENSG00000115053_daRNA	NCL	True
chr2	231702917	231710275	-	ENSG00000187514	ENSG00000187514_daRNA	PTMA	True
chr2	232550557	232550970	-	ENSG00000135930	ENSG00000135930_daRNA	EIF4E2	True
chr2	236165236	236168386	-	ENSG00000233611	ENSG00000168505	ENSG00000233611	False
chr2	237485858	237487146	-	ENSG00000115648	ENSG00000115648_daRNA	MLPH	True
chr2	237591071	237591639	-	ENSG00000234949	ENSG00000234949_daRNA	ENSG00000234949	True
chr2	238288963	238300197	+	ENSG00000132326	ENSG00000132326_daRNA	PER2	True
chr2	238426401	238426892	-	ENSG00000065802	ENSG00000065802_daRNA	ASB1	True
chr2	239401436	239402364	+	ENSG00000068024	ENSG00000222020	HDAC4	False
chr2	240435663	240468076	+	ENSG00000218416	ENSG00000063660	ENSG00000218416	False
chr2	240449419	240453234	-	ENSG00000063660	ENSG00000063660_daRNA	GPC1	True
chr2	240479422	240569209	-	ENSG00000188542	ENSG00000144504	DUSP28	False
chr2	240479422	240569209	-	ENSG00000142327	ENSG00000144504	RNPEPL1	False
chr2	240582755	240587302	-	ENSG00000142330	ENSG00000142330_daRNA	CAPN10	True
chr2	241106099	241150264	-	ENSG00000115685	ENSG00000115687	PPP1R7	False
chr2	241272166	241273609	+	ENSG00000115677	ENSG00000115677_daRNA	HDLBP	True
chr2	241315100	241354027	+	ENSG00000115677	ENSG00000168385	HDLBP	False
chr2	241558405	241559045	-	ENSG00000176720	ENSG00000176720_daRNA	BOK	True
chr2	241637213	241673857	+	ENSG00000176946	ENSG00000168397	THAP4	False
chr2	241732158	241735461	-	ENSG00000180902	ENSG00000180902_daRNA	D2HGDH	True
chr20	297100	298281	-	ENSG00000247315	ENSG00000247315_daRNA	ZCCHC3	True
chr20	297100	325782	-	ENSG00000177732	ENSG00000177732_daRNA	SOX12	True
chr20	297100	347717	-	ENSG00000125841	ENSG00000125841_daRNA	NRSN2	True
chr20	376693	381976	-	ENSG00000101255	ENSG00000101255_daRNA	TRIB3	True
chr20	839400	842402	-	ENSG00000125898	ENSG00000125898_daRNA	FAM110A	True
chr20	1309909	1329139	-	ENSG00000234684	ENSG00000125775	SDCBP2-AS1	False
chr20	2101617	2102367	-	ENSG00000125834	ENSG00000125834_daRNA	STK35	True
chr20	2840671	2841149	-	ENSG00000215305	ENSG00000215305_daRNA	VPS16	True
chr20	3204066	3207994	+	ENSG00000198171	ENSG00000198171_daRNA	DDRGK1	True
chr20	3208393	3209459	-	ENSG00000125877	ENSG00000125877_daRNA	ITPA	True
chr20	3786442	3787649	+	ENSG00000125817	ENSG00000125817_daRNA	CENPB	True
chr20	3888254	3889072	-	ENSG00000125779	ENSG00000125779_daRNA	PANK2	True
chr20	8019180	8043512	+	ENSG00000125827	ENSG00000229766	TMX4	False
chr20	13784886	13785368	-	ENSG00000101247	ENSG00000101247_daRNA	NDUFAF5	True
chr20	17569173	17570082	+	ENSG00000125864	ENSG00000125864_daRNA	BFSP1	True
chr20	17968613	17969018	+	ENSG00000089006	ENSG00000089006_daRNA	SNX5	True
chr20	19756390	19758037	-	ENSG00000132669	ENSG00000268628	RIN2	False
chr20	21302731	21303704	-	ENSG00000088930	ENSG00000275457	XRN2	False
chr20	23344102	23351465	-	ENSG00000132661	ENSG00000132661_daRNA	NXT1	True
chr20	25185548	25196902	-	ENSG00000197586	ENSG00000197586_daRNA	ENTPD6	True
chr20	25623871	25632053	+	ENSG00000170191	ENSG00000170191_daRNA	NANP	True
chr20	25624014	25624420	-	ENSG00000213742	ENSG00000213742_daRNA	ZNF337-AS1	True
chr20	25696624	25697463	+	ENSG00000130684	ENSG00000130684_daRNA	ZNF337	True
chr20	31573011	31577925	+	ENSG00000230613	ENSG00000230613_daRNA	HM13-AS1	True
chr20	31722664	31801799	+	ENSG00000171552	ENSG00000171552_daRNA	BCL2L1	True
chr20	33808172	33812319	-	ENSG00000101421	ENSG00000101421_daRNA	CHMP4B	True
chr20	33992526	33994426	-	ENSG00000125970	ENSG00000125970_daRNA	RALY	True
chr20	35699272	35700984	+	ENSG00000244005	ENSG00000125995	NFS1	False
chr20	35954386	35954707	+	ENSG00000171222	ENSG00000171222_daRNA	SCAND1	True
chr20	37095785	37097178	+	ENSG00000080839	ENSG00000269846	RBL1	False
chr20	37101226	37179588	-	ENSG00000118705	ENSG00000101353	RPN2	False
chr20	41098019	41138003	-	ENSG00000124181	ENSG00000226648	PLCG1	False
chr20	44695073	44746252	-	ENSG00000124249	ENSG00000124249_daRNA	KCNK15	True
chr20	45926518	45935055	-	ENSG00000100982	ENSG00000285796	PCIF1	False
chr20	45972063	45972997	+	ENSG00000198026	ENSG00000198026_daRNA	ZNF335	True
chr20	46013500	46021880	-	ENSG00000124140	ENSG00000124140_daRNA	SLC12A5	True
chr20	46089683	46090648	+	ENSG00000124160	ENSG00000124160_daRNA	NCOA5	True
chr20	46688990	46690287	+	ENSG00000172315	ENSG00000172315_daRNA	TP53RK	True
chr20	47785644	47786883	+	ENSG00000196562	ENSG00000196562_daRNA	SULF2	True
chr20	48821689	48922410	-	ENSG00000124198	ENSG00000124198_daRNA	ARFGEF2	True
chr20	49017222	49046682	-	ENSG00000124207	ENSG00000124207_daRNA	CSE1L	True
chr20	49237946	49278426	-	ENSG00000177410	ENSG00000124201	ZFAS1	False
chr20	49278427	49281226	-	ENSG00000177410	ENSG00000177410_daRNA	ZFAS1	True
chr20	50185301	50191322	-	ENSG00000172216	ENSG00000172216_daRNA	CEBPB	True
chr20	50729646	50731968	-	ENSG00000124171	ENSG00000124171_daRNA	PARD6B	True
chr20	50930984	50945148	+	ENSG00000101126	ENSG00000259456	ADNP	False
chr20	51767463	51767986	+	ENSG00000054793	ENSG00000054793_daRNA	ATP9A	True
chr20	52191779	52192135	-	ENSG00000234948	ENSG00000234948_daRNA	LINC01524	True
chr20	57266441	57267285	+	ENSG00000101144	ENSG00000101144_daRNA	BMP7	True
chr20	57648392	57711536	-	ENSG00000278709	ENSG00000124225	NKILA	False
chr20	57708685	57712767	+	ENSG00000124225	ENSG00000124225_daRNA	PMEPA1	True
chr20	58309452	58310648	-	ENSG00000124209	ENSG00000124209_daRNA	RAB22A	True
chr20	58650749	58652341	-	ENSG00000124222	ENSG00000124222_daRNA	STX16	True
chr20	58820624	58890930	-	ENSG00000087460	ENSG00000087460_daRNA	GNAS	True
chr20	59933655	59934157	-	ENSG00000196227	ENSG00000196227_daRNA	FAM217B	True
chr20	62143441	62144455	-	ENSG00000184402	ENSG00000184402_daRNA	SS18L1	True
chr20	62386304	62387679	-	ENSG00000171858	ENSG00000171858_daRNA	RPS21	True
chr20	62386747	62387103	+	ENSG00000273619	ENSG00000273619_daRNA	ENSG00000273619	True
chr20	62926282	62926938	+	ENSG00000101191	ENSG00000101191_daRNA	DIDO1	True
chr20	62928622	62938654	-	ENSG00000101193	ENSG00000101193_daRNA	GID8	True
chr20	63102205	63104386	+	ENSG00000231133	ENSG00000225978	HAR1B	False
chr20	63517262	63521128	-	ENSG00000125534	ENSG00000125534_daRNA	PPDPF	True
chr20	63587606	63628397	-	ENSG00000232442	ENSG00000232442_daRNA	MHENCR	True
chr20	63652250	63655000	+	ENSG00000197457	ENSG00000197457_daRNA	STMN3	True
chr20	63707465	63736142	+	ENSG00000101246	ENSG00000197114	ARFRP1	False
chr20	63708025	63708595	-	ENSG00000197114	ENSG00000197114_daRNA	ZGPAT	True
chr20	63861216	63865872	-	ENSG00000101150	ENSG00000101150_daRNA	TPD52L2	True
chr20	63955997	63956738	+	ENSG00000198276	ENSG00000198276_daRNA	UCKL1	True
chr20	63979006	63981131	+	ENSG00000130590	ENSG00000130590_daRNA	SAMD10	True
chr21	15065160	15067829	+	ENSG00000180530	ENSG00000180530_daRNA	NRIP1	True
chr21	17611744	17633199	+	ENSG00000154640	ENSG00000280594	BTG3	False
chr21	25734570	25772460	+	ENSG00000154723	ENSG00000154727	ATP5PF	False
chr21	29024255	29024890	-	ENSG00000156256	ENSG00000273254	USP16	False
chr21	31559631	31560484	+	ENSG00000156299	ENSG00000156299_daRNA	TIAM1	True
chr21	34888202	34891700	+	ENSG00000159216	ENSG00000159216_daRNA	RUNX1	True
chr21	36128731	36132449	-	ENSG00000214889	ENSG00000214889_daRNA	RPS9P1	True
chr21	36131767	36175815	-	ENSG00000159231	ENSG00000236830	CBR3	False
chr21	36319800	36320473	-	ENSG00000159256	ENSG00000159256_daRNA	MORC3	True
chr21	36966461	36975164	+	ENSG00000159267	ENSG00000224790	HLCS	False
chr21	37267693	37296530	+	ENSG00000157538	ENSG00000157538_daRNA	VPS26C	True
chr21	37365482	37367910	-	ENSG00000157540	ENSG00000157540_daRNA	DYRK1A	True
chr21	37365880	37366773	+	ENSG00000273210	ENSG00000273210_daRNA	ENSG00000273210	True
chr21	39313069	39315746	+	ENSG00000185658	ENSG00000185658_daRNA	BRWD1	True
chr21	39348725	39370892	+	ENSG00000205581	ENSG00000205581_daRNA	HMGN1	True
chr21	41507320	41524809	+	ENSG00000184012	ENSG00000184012_daRNA	TMPRSS2	True
chr21	42010098	42011595	+	ENSG00000173276	ENSG00000173276_daRNA	ZBTB21	True
chr21	42364792	42365102	+	ENSG00000160182	ENSG00000160182_daRNA	TFF1	True
chr21	42879134	42879644	+	ENSG00000160193	ENSG00000160193_daRNA	WDR4	True
chr21	44299410	44300370	-	ENSG00000141959	ENSG00000141959_daRNA	PFKL	True
chr21	44339123	44340690	+	ENSG00000160226	ENSG00000160226_daRNA	CFAP410	True
chr21	45070958	45074461	-	ENSG00000197381	ENSG00000197381_daRNA	ADARB1	True
chr21	45403813	45405580	-	ENSG00000182871	ENSG00000182871_daRNA	COL18A1	True
chr21	46235134	46286610	-	ENSG00000182362	ENSG00000182362_daRNA	YBEY	True
chr21	46285844	46286342	+	ENSG00000160294	ENSG00000160294_daRNA	MCM3AP	True
chr21	46323875	46324459	-	ENSG00000160299	ENSG00000160299_daRNA	PCNT	True
chr22	17159277	17159782	-	ENSG00000185837	ENSG00000185837_daRNA	HDHD5-AS1	True
chr22	18077190	18078487	-	ENSG00000215193	ENSG00000215193_daRNA	PEX26	True
chr22	19447405	19454601	+	ENSG00000242259	ENSG00000242259_daRNA	C22orf39	True
chr22	19447711	19448249	-	ENSG00000185065	ENSG00000185065_daRNA	ENSG00000185065	True
chr22	21001886	21010342	+	ENSG00000184436	ENSG00000230513	THAP7	False
chr22	21629478	21630687	+	ENSG00000161179	ENSG00000161179_daRNA	YDJC	True
chr22	21919425	21952848	-	ENSG00000224086	ENSG00000100034	PPM1F-AS1	False
chr22	23891185	23894924	-	ENSG00000240972	ENSG00000240972_daRNA	MIF	True
chr22	24555484	24555999	+	ENSG00000138867	ENSG00000138867_daRNA	GUCD1	True
chr22	27918593	27986390	+	ENSG00000180957	ENSG00000180957_daRNA	PITPNB	True
chr22	28741834	28742408	-	ENSG00000100209	ENSG00000100209_daRNA	HSCB	True
chr22	28800209	28803528	+	ENSG00000100219	ENSG00000100219_daRNA	XBP1	True
chr22	28801409	28802317	-	ENSG00000226471	ENSG00000226471_daRNA	ENSG00000226471	True
chr22	30356661	30357001	+	ENSG00000099995	ENSG00000099995_daRNA	SF3A1	True
chr22	31290907	31348683	+	ENSG00000100100	ENSG00000100100_daRNA	PIK3IP1	True
chr22	31346156	31348683	+	ENSG00000100105	ENSG00000100105_daRNA	PATZ1	True
chr22	37019447	37020352	-	ENSG00000128309	ENSG00000128309_daRNA	MPST	True
chr22	37019542	37019768	+	ENSG00000128311	ENSG00000128311_daRNA	TST	True
chr22	37848868	37889407	+	ENSG00000100124	ENSG00000100129	ANKRD54	False
chr22	37849327	37849607	-	ENSG00000100129	ENSG00000100129_daRNA	EIF3L	True
chr22	39243042	39248569	+	ENSG00000100311	ENSG00000100311_daRNA	PDGFB	True
chr22	41288033	41302367	-	ENSG00000100403	ENSG00000100403_daRNA	ZC3H7B	True
chr22	42269703	42279534	+	ENSG00000100207	ENSG00000182057	TCF20	False
chr22	46537582	46548195	+	ENSG00000075275	ENSG00000075275_daRNA	CELSR1	True
chr22	49918220	49918733	+	ENSG00000182858	ENSG00000182858_daRNA	ALG12	True
chr22	50531073	50533201	+	ENSG00000177989	ENSG00000177989_daRNA	ODF3B	True
chr22	50582690	50596814	+	ENSG00000100288	ENSG00000100288_daRNA	CHKB	True
chr3	4979464	4980873	+	ENSG00000235831	ENSG00000235831_daRNA	BHLHE40-AS1	True
chr3	8501619	8501823	+	ENSG00000227110	ENSG00000227110_daRNA	LMCD1-AS1	True
chr3	8768018	8770269	+	ENSG00000180914	ENSG00000180914_daRNA	OXTR	True
chr3	9292588	9363303	-	ENSG00000134077	ENSG00000254485	THUMPD3	False
chr3	9349689	9398579	-	ENSG00000168137	ENSG00000206573	SETD5	False
chr3	10248040	10249432	-	ENSG00000157014	ENSG00000157014_daRNA	TATDN2	True
chr3	14124870	14125865	-	ENSG00000170876	ENSG00000170876_daRNA	TMEM43	True
chr3	14920347	14948424	-	ENSG00000177463	ENSG00000225733	NR2C2	False
chr3	15859015	15861034	+	ENSG00000206560	ENSG00000206560_daRNA	ANKRD28	True
chr3	19945947	19947982	-	ENSG00000144566	ENSG00000144566_daRNA	RAB5A	True
chr3	24494960	24500010	+	ENSG00000151090	ENSG00000151090_daRNA	THRB	True
chr3	25782917	25794534	+	ENSG00000151092	ENSG00000151093	NGLY1	False
chr3	28348721	28538122	+	ENSG00000163512	ENSG00000206559	AZI2	False
chr3	31531656	31532870	-	ENSG00000163527	ENSG00000163527_daRNA	STT3B	True
chr3	31980969	31981750	+	ENSG00000144645	ENSG00000144645_daRNA	OSBPL10	True
chr3	32570370	32572081	+	ENSG00000144635	ENSG00000144635_daRNA	DYNC1LI1	True
chr3	33440880	33441488	+	ENSG00000153560	ENSG00000153560_daRNA	UBP1	True
chr3	33795680	33799017	-	ENSG00000170248	ENSG00000170248_daRNA	PDCD6IP	True
chr3	37241812	37243657	-	ENSG00000144674	ENSG00000144674_daRNA	GOLGA4	True
chr3	39292556	39384300	-	ENSG00000144659	ENSG00000287780	SLC25A38	False
chr3	39383082	39383582	-	ENSG00000144659	ENSG00000144659_daRNA	SLC25A38	True
chr3	42547969	42601080	-	ENSG00000114857	ENSG00000093183	NKTR	False
chr3	43354859	43691594	-	ENSG00000011198	ENSG00000160746	ABHD5	False
chr3	43690785	43690900	+	ENSG00000160746	ENSG00000160746_daRNA	ANO10	True
chr3	44975241	45036066	+	ENSG00000163812	ENSG00000075914	ZDHHC3	False
chr3	46921726	46982010	-	ENSG00000160796	ENSG00000160799	NBEAL2	False
chr3	47282649	47282917	+	ENSG00000088727	ENSG00000088727_daRNA	KIF9	True
chr3	47379385	47381448	-	ENSG00000076201	ENSG00000076201_daRNA	PTPN23	True
chr3	48440120	48441125	-	ENSG00000232112	ENSG00000232112_daRNA	TMA7	True
chr3	48985488	48990929	-	ENSG00000178467	ENSG00000178467_daRNA	P4HTM	True
chr3	49723508	49724616	+	ENSG00000173540	ENSG00000173540_daRNA	GMPPB	True
chr3	49929619	49930356	+	ENSG00000164077	ENSG00000164077_daRNA	MON1A	True
chr3	50152832	50157280	-	ENSG00000001617	ENSG00000001617_daRNA	SEMA3F	True
chr3	50266643	50271522	-	ENSG00000012171	ENSG00000012171_daRNA	SEMA3B	True
chr3	50350809	50351059	-	ENSG00000114395	ENSG00000114395_daRNA	CYB561D2	True
chr3	50611520	50649291	+	ENSG00000114737	ENSG00000114738	CISH	False
chr3	50611774	50611976	-	ENSG00000114738	ENSG00000114738_daRNA	MAPKAPK3	True
chr3	51967615	51975056	+	ENSG00000090097	ENSG00000090097_daRNA	PCBP4	True
chr3	52254434	52288020	-	ENSG00000168237	ENSG00000164091	GLYCTK	False
chr3	52524385	52535054	-	ENSG00000168273	ENSG00000168268	SMIM4	False
chr3	52685687	52686016	+	ENSG00000163939	ENSG00000163939_daRNA	PBRM1	True
chr3	52704955	52711148	+	ENSG00000016864	ENSG00000114902	GLT8D1	False
chr3	53045664	53048120	+	ENSG00000163935	ENSG00000163935_daRNA	SFMBT1	True
chr3	57755005	57756838	-	ENSG00000163681	ENSG00000163681_daRNA	SLMAP	True
chr3	63863155	64003462	+	ENSG00000163634	ENSG00000163635	THOC7	False
chr3	63911519	63912888	-	ENSG00000163635	ENSG00000163635_daRNA	ATXN7	True
chr3	64012514	64016456	+	ENSG00000163636	ENSG00000163636_daRNA	PSMD6	True
chr3	64445231	64456070	+	ENSG00000163637	ENSG00000244564	PRICKLE2	False
chr3	69013313	69014488	+	ENSG00000163378	ENSG00000163378_daRNA	EOGT	True
chr3	70959226	71754229	-	ENSG00000170837	ENSG00000285708	GPR27	False
chr3	71581721	71628558	+	ENSG00000114861	ENSG00000277855	FOXP1	False
chr3	71583778	71628326	+	ENSG00000114861	ENSG00000114861_daRNA	FOXP1	True
chr3	81761308	81762384	+	ENSG00000114480	ENSG00000114480_daRNA	GBE1	True
chr3	87226362	87227720	-	ENSG00000083937	ENSG00000083937_daRNA	CHMP2B	True
chr3	88149744	88149959	+	ENSG00000163320	ENSG00000163320_daRNA	CGGBP1	True
chr3	96813339	96814580	+	ENSG00000286447	ENSG00000286447_daRNA	ENSG00000286447	True
chr3	101512861	101513212	+	ENSG00000138468	ENSG00000138468_daRNA	SENP7	True
chr3	101676475	101679217	+	ENSG00000066422	ENSG00000256628	ZBTB11	False
chr3	108589517	108589705	+	ENSG00000163507	ENSG00000163507_daRNA	CIP2A	True
chr3	108589644	108589849	-	ENSG00000198919	ENSG00000198919_daRNA	DZIP3	True
chr3	112561709	112585579	+	ENSG00000144848	ENSG00000138459	ATG3	False
chr3	113019468	113184377	+	ENSG00000163608	ENSG00000240057	NEPRO	False
chr3	119821321	120094994	-	ENSG00000242622	ENSG00000082701	ENSG00000242622	False
chr3	120349354	120349531	-	ENSG00000240661	ENSG00000240661_daRNA	ENSG00000240661	True
chr3	122383886	122384410	-	ENSG00000114023	ENSG00000114023_daRNA	FAM162A	True
chr3	122416062	122416461	-	ENSG00000272758	ENSG00000272758_daRNA	WDR5B-DT	True
chr3	122527924	122564577	-	ENSG00000163840	ENSG00000138496	DTX3L	False
chr3	122564224	122564427	+	ENSG00000138496	ENSG00000138496_daRNA	PARP9	True
chr3	123448887	123450542	+	ENSG00000173175	ENSG00000173175_daRNA	ADCY5	True
chr3	125936638	125944288	+	ENSG00000189366	ENSG00000189366_daRNA	ALG1L	True
chr3	126006357	126101561	-	ENSG00000250012	ENSG00000114544	ENSG00000250012	False
chr3	128064778	128153914	-	ENSG00000132394	ENSG00000175792	EEFSEC	False
chr3	128680875	128681473	+	ENSG00000163902	ENSG00000163902_daRNA	RPN1	True
chr3	128723360	128726837	-	ENSG00000075785	ENSG00000075785_daRNA	RAB7A	True
chr3	129001304	129040742	+	ENSG00000114656	ENSG00000114654	CFAP92	False
chr3	129315148	129318669	+	ENSG00000184897	ENSG00000184897_daRNA	H1-10	True
chr3	129476962	129487923	-	ENSG00000163913	ENSG00000163913_daRNA	IFT122	True
chr3	132558138	132660082	-	ENSG00000081307	ENSG00000240303	UBA5	False
chr3	132660082	132660669	-	ENSG00000081307	ENSG00000081307_daRNA	UBA5	True
chr3	134250380	134251230	+	ENSG00000163785	ENSG00000163785_daRNA	RYK	True
chr3	134485699	134587789	+	ENSG00000129055	ENSG00000182923	ANAPC13	False
chr3	141367815	141368363	-	ENSG00000177311	ENSG00000177311_daRNA	ZBTB38	True
chr3	141737980	141738764	-	ENSG00000114125	ENSG00000114125_daRNA	RNF7	True
chr3	147392482	147393017	+	ENSG00000174963	ENSG00000174963_daRNA	ZIC4	True
chr3	149658041	149658555	-	ENSG00000241313	ENSG00000241313_daRNA	WWTR1-AS1	True
chr3	149970995	149973240	+	ENSG00000070087	ENSG00000070087_daRNA	PFN2	True
chr3	150225935	150239196	-	ENSG00000244541	ENSG00000244541_daRNA	LINC01213	True
chr3	150265409	150408539	-	ENSG00000196428	ENSG00000196428_daRNA	TSC22D2	True
chr3	150761937	150873554	+	ENSG00000181788	ENSG00000244265	SIAH2	False
chr3	152245262	152269557	-	ENSG00000152601	ENSG00000229619	MBNL1	False
chr3	153161417	153162226	+	ENSG00000244268	ENSG00000244268_daRNA	ENSG00000244268	True
chr3	156824195	156826751	-	ENSG00000197980	ENSG00000197980_daRNA	LEKR1	True
chr3	157159545	157162509	+	ENSG00000163660	ENSG00000163660_daRNA	CCNL1	True
chr3	158109920	158110572	-	ENSG00000174891	ENSG00000174891_daRNA	RSRC1	True
chr3	158643524	158644761	-	ENSG00000168827	ENSG00000168827_daRNA	GFM1	True
chr3	160399307	160399638	+	ENSG00000068885	ENSG00000068885_daRNA	IFT80	True
chr3	160399544	160400133	-	ENSG00000113810	ENSG00000113810_daRNA	SMC4	True
chr3	161104696	161253532	+	ENSG00000169255	ENSG00000169251	B3GALNT1	False
chr3	161221010	161221614	-	ENSG00000169251	ENSG00000169251_daRNA	NMD3	True
chr3	161372129	161377983	+	ENSG00000196542	ENSG00000196542_daRNA	SPTSSB	True
chr3	169663091	169664227	+	ENSG00000085276	ENSG00000085276_daRNA	MECOM	True
chr3	169769368	169770167	+	ENSG00000184378	ENSG00000184378_daRNA	ACTRT3	True
chr3	171809742	171812269	+	ENSG00000075651	ENSG00000075651_daRNA	PLD1	True
chr3	184134019	184135238	-	ENSG00000145191	ENSG00000272721	EIF2B5	False
chr3	184249008	184249672	+	ENSG00000214160	ENSG00000214160_daRNA	ALG3	True
chr3	184310318	184315405	-	ENSG00000114867	ENSG00000114867_daRNA	EIF4G1	True
chr3	184361605	184362481	-	ENSG00000163882	ENSG00000163882_daRNA	POLR2H	True
chr3	188151206	188154057	-	ENSG00000145012	ENSG00000270959	LPP	False
chr3	188152887	188154255	-	ENSG00000145012	ENSG00000145012_daRNA	LPP	True
chr3	192143658	192515277	-	ENSG00000230126	ENSG00000230126_daRNA	FGF12-AS2	True
chr3	192917138	192918330	+	ENSG00000180611	ENSG00000180611_daRNA	MB21D2	True
chr3	194632923	194645401	+	ENSG00000145014	ENSG00000229334	TMEM44	False
chr3	194633102	194640745	+	ENSG00000145014	ENSG00000145014_daRNA	TMEM44	True
chr3	195863365	195909584	-	ENSG00000224614	ENSG00000224614_daRNA	TNK2-AS1	True
chr3	196318028	196320104	+	ENSG00000213123	ENSG00000213123_daRNA	DYNLT2B	True
chr3	196568522	196568727	-	ENSG00000174013	ENSG00000174013_daRNA	FBXO45	True
chr3	196712250	196712592	-	ENSG00000163964	ENSG00000163964_daRNA	PIGX	True
chr3	196942528	196943128	-	ENSG00000270170	ENSG00000270170_daRNA	NCBP2AS2	True
chr3	196968925	196971805	+	ENSG00000119227	ENSG00000119227_daRNA	PIGZ	True
chr3	197298252	197303755	+	ENSG00000075711	ENSG00000227375	DLG1	False
chr4	661553	664154	-	ENSG00000133256	ENSG00000133256_daRNA	PDE6B	True
chr4	673580	682033	+	ENSG00000169020	ENSG00000215375	ATP5ME	False
chr4	986895	987270	-	ENSG00000127415	ENSG00000127415_daRNA	IDUA	True
chr4	1248940	1267411	+	ENSG00000159692	ENSG00000159692_daRNA	CTBP1	True
chr4	1249118	1249428	-	ENSG00000196810	ENSG00000196810_daRNA	CTBP1-DT	True
chr4	2261765	2266561	+	ENSG00000123933	ENSG00000123933_daRNA	MXD4	True
chr4	2962953	2963571	+	ENSG00000087269	ENSG00000087269_daRNA	NOP14	True
chr4	3075365	3075524	-	ENSG00000197386	ENSG00000197386_daRNA	HTT	True
chr4	3474944	3484752	-	ENSG00000175920	ENSG00000175920_daRNA	DOK7	True
chr4	3954745	4075152	+	ENSG00000251669	ENSG00000251669_daRNA	FAM86EP	True
chr4	6648695	6673965	-	ENSG00000170846	ENSG00000251580	ENSG00000170846	False
chr4	14629658	15003063	-	ENSG00000137449	ENSG00000137449_daRNA	CPEB2	True
chr4	16226471	16226894	-	ENSG00000263327	ENSG00000263327_daRNA	TAPT1-AS1	True
chr4	19172335	19456994	-	ENSG00000248515	ENSG00000248238	ENSG00000248515	False
chr4	24583833	24586657	+	ENSG00000109606	ENSG00000109606_daRNA	DHX15	True
chr4	38602438	38664914	-	ENSG00000109787	ENSG00000231160	KLF3	False
chr4	39498755	39528311	-	ENSG00000249348	ENSG00000109814	UGDH-AS1	False
chr4	40042917	40057199	-	ENSG00000078177	ENSG00000205794	N4BP2	False
chr4	52051746	52051924	-	ENSG00000163071	ENSG00000163071_daRNA	SPATA18	True
chr4	55546909	55547103	-	ENSG00000272969	ENSG00000272969_daRNA	ENSG00000272969	True
chr4	56467236	56468168	-	ENSG00000174780	ENSG00000174780_daRNA	SRP72	True
chr4	70703965	70705301	-	ENSG00000018189	ENSG00000018189_daRNA	RUFY3	True
chr4	75514418	75514646	-	ENSG00000174796	ENSG00000174796_daRNA	THAP6	True
chr4	76305893	76307210	-	ENSG00000118804	ENSG00000118804_daRNA	STBD1	True
chr4	77076102	77151496	+	ENSG00000118816	ENSG00000118816_daRNA	CCNI	True
chr4	77156430	77158273	-	ENSG00000138764	ENSG00000138764_daRNA	CCNG2	True
chr4	82430052	82430590	+	ENSG00000152795	ENSG00000152795_daRNA	HNRNPDL	True
chr4	82900569	82900942	-	ENSG00000168152	ENSG00000168152_daRNA	THAP9	True
chr4	84965534	85011277	+	ENSG00000163625	ENSG00000180769	WDFY3	False
chr4	86924630	86936202	-	ENSG00000172493	ENSG00000284968	AFF1	False
chr4	99088751	99088926	-	ENSG00000246090	ENSG00000246090_daRNA	ENSG00000246090	True
chr4	102500842	102501537	-	ENSG00000109320	ENSG00000109320_daRNA	NFKB1	True
chr4	102827612	102843798	+	ENSG00000109332	ENSG00000109332_daRNA	UBE2D3	True
chr4	105137280	105146454	-	ENSG00000168769	ENSG00000168769_daRNA	TET2	True
chr4	105682627	105895986	-	ENSG00000168743	ENSG00000138785	NPNT	False
chr4	110197697	110198399	+	ENSG00000170522	ENSG00000170522_daRNA	ELOVL6	True
chr4	127917799	127966034	-	ENSG00000164074	ENSG00000164073	ABHD18	False
chr4	133109855	133150744	-	ENSG00000138650	ENSG00000138650_daRNA	PCDH10	True
chr4	139083762	139084767	+	ENSG00000109381	ENSG00000109381_daRNA	ELF2	True
chr4	139266880	139302551	-	ENSG00000164134	ENSG00000109390	NAA15	False
chr4	139555323	139557641	+	ENSG00000145391	ENSG00000145391_daRNA	SETD7	True
chr4	140753062	140756868	-	ENSG00000273472	ENSG00000273472_daRNA	ENSG00000273472	True
chr4	147730900	147733003	-	ENSG00000071205	ENSG00000071205_daRNA	ARHGAP10	True
chr4	151015386	151036005	+	ENSG00000198589	ENSG00000198589_daRNA	LRBA	True
chr4	152934516	152936761	-	ENSG00000137460	ENSG00000287642	FHDC1	False
chr4	158172836	158202876	+	ENSG00000164125	ENSG00000164125_daRNA	GASK1B	True
chr4	158671892	158672221	-	ENSG00000171503	ENSG00000171503_daRNA	ETFDH	True
chr4	173094868	173169652	-	ENSG00000109586	ENSG00000245213	GALNT7	False
chr4	174283332	174283730	+	ENSG00000164117	ENSG00000164117_daRNA	FBXO8	True
chr4	174283667	174284262	-	ENSG00000164118	ENSG00000164118_daRNA	CEP44	True
chr4	176308268	176320458	-	ENSG00000129128	ENSG00000248980	SPCS3	False
chr5	1344385	1350798	+	ENSG00000049656	ENSG00000049656_daRNA	CLPTM1L	True
chr5	1882598	1884646	+	ENSG00000113430	ENSG00000113430_daRNA	IRX4	True
chr5	7850860	7853401	+	ENSG00000215217	ENSG00000215217_daRNA	C5orf49	True
chr5	10307674	10309247	+	ENSG00000164237	ENSG00000164237_daRNA	CMBL	True
chr5	10760785	10762367	+	ENSG00000112977	ENSG00000112977_daRNA	DAP	True
chr5	14141046	14144215	-	ENSG00000038382	ENSG00000038382_daRNA	TRIO	True
chr5	14664195	14664718	+	ENSG00000261360	ENSG00000261360_daRNA	OTULIN-DT	True
chr5	32173871	32175270	+	ENSG00000113384	ENSG00000113384_daRNA	GOLPH3	True
chr5	33439322	33440802	-	ENSG00000113407	ENSG00000113407_daRNA	TARS1	True
chr5	34915348	34915710	+	ENSG00000113456	ENSG00000113456_daRNA	RAD1	True
chr5	34925224	34929832	-	ENSG00000168724	ENSG00000168724_daRNA	DNAJC21	True
chr5	37106228	37249376	-	ENSG00000286193	ENSG00000197603	ENSG00000286193	False
chr5	43018146	43018854	+	ENSG00000177738	ENSG00000177738_daRNA	ENSG00000177738	True
chr5	43040346	43043245	-	ENSG00000215068	ENSG00000215068_daRNA	ENSG00000215068	True
chr5	43061959	43066452	-	ENSG00000172262	ENSG00000172262_daRNA	ZNF131	True
chr5	43483893	43484406	-	ENSG00000249492	ENSG00000249492_daRNA	ENSG00000249492	True
chr5	43602692	43707405	+	ENSG00000248092	ENSG00000112992	NNT-AS1	False
chr5	69189452	69189778	-	ENSG00000153044	ENSG00000153044_daRNA	CENPH	True
chr5	69369520	69369822	-	ENSG00000152942	ENSG00000152942_daRNA	RAD17	True
chr5	69414676	69416884	-	ENSG00000152939	ENSG00000152939_daRNA	MARVELD2	True
chr5	72940355	72956697	-	ENSG00000157107	ENSG00000157107_daRNA	FCHO2	True
chr5	72955570	72956041	+	ENSG00000272081	ENSG00000272081_daRNA	FCHO2-DT	True
chr5	74865893	74867854	+	ENSG00000198780	ENSG00000271714	FAM169A	False
chr5	75336529	75337220	+	ENSG00000247372	ENSG00000247372_daRNA	ENSG00000247372	True
chr5	77086688	77166909	+	ENSG00000132846	ENSG00000250802	ZBED3	False
chr5	80255285	80260432	+	ENSG00000164300	ENSG00000164300_daRNA	SERINC5	True
chr5	80487810	80487986	+	ENSG00000249042	ENSG00000249042_daRNA	ENSG00000249042	True
chr5	80487969	80542563	+	ENSG00000249042	ENSG00000152380	ENSG00000249042	False
chr5	80626226	80654983	-	ENSG00000113318	ENSG00000228716	MSH3	False
chr5	90409401	90416464	+	ENSG00000153140	ENSG00000153140_daRNA	CETN3	True
chr5	90474524	90474864	+	ENSG00000176055	ENSG00000176055_daRNA	MBLAC2	True
chr5	91368631	91383317	-	ENSG00000281357	ENSG00000113369	ARRDC3-AS1	False
chr5	91381169	91672314	+	ENSG00000113369	ENSG00000113369_daRNA	ARRDC3	True
chr5	95730802	95732098	-	ENSG00000164292	ENSG00000164292_daRNA	RHOBTB3	True
chr5	96661758	96662889	-	ENSG00000153113	ENSG00000153113_daRNA	CAST	True
chr5	96814028	96935809	-	ENSG00000113441	ENSG00000247121	LNPEP	False
chr5	96934867	96935394	+	ENSG00000247121	ENSG00000247121_daRNA	ENSG00000247121	True
chr5	98771082	98774452	-	ENSG00000174136	ENSG00000174136_daRNA	RGMB	True
chr5	98929007	98929712	-	ENSG00000248489	ENSG00000248489_daRNA	LINC02062	True
chr5	108382098	108382353	-	ENSG00000286503	ENSG00000286503_daRNA	ENSG00000286503	True
chr5	109409116	109409816	+	ENSG00000198961	ENSG00000198961_daRNA	PJA2	True
chr5	112419252	112420974	+	ENSG00000129595	ENSG00000129595_daRNA	EPB41L4A	True
chr5	112921705	112922850	+	ENSG00000129625	ENSG00000129625_daRNA	REEP5	True
chr5	113487550	113490023	+	ENSG00000171444	ENSG00000171444_daRNA	MCC	True
chr5	115262505	115263448	+	ENSG00000164219	ENSG00000271797	PGGT1B	False
chr5	115841621	115841935	+	ENSG00000145782	ENSG00000145782_daRNA	ATG12	True
chr5	116083807	116085416	-	ENSG00000145781	ENSG00000271918	COMMD10	False
chr5	123023385	123036360	-	ENSG00000249996	ENSG00000249996_daRNA	PPIC-AS1	True
chr5	123086164	123089440	-	ENSG00000061455	ENSG00000061455_daRNA	PRDM6	True
chr5	127229301	127232187	+	ENSG00000283897	ENSG00000283897_daRNA	ENSG00000283897	True
chr5	128023152	128084581	-	ENSG00000064651	ENSG00000064651_daRNA	SLC12A2	True
chr5	128082843	128083175	+	ENSG00000245937	ENSG00000245937_daRNA	LINC01184	True
chr5	129092927	129095345	-	ENSG00000066583	ENSG00000066583_daRNA	ISOC1	True
chr5	129424782	129461076	-	ENSG00000145808	ENSG00000249421	ADAMTS19	False
chr5	129459140	129461743	-	ENSG00000145808	ENSG00000145808_daRNA	ADAMTS19	True
chr5	132370966	132371258	-	ENSG00000197375	ENSG00000197375_daRNA	SLC22A5	True
chr5	134004851	134005561	+	ENSG00000213585	ENSG00000213585_daRNA	VDAC1	True
chr5	134226073	134226663	-	ENSG00000270177	ENSG00000270177_daRNA	PPP2CA-DT	True
chr5	134526289	134526868	-	ENSG00000043143	ENSG00000043143_daRNA	JADE2	True
chr5	138032774	138037266	+	ENSG00000031003	ENSG00000246323	FAM13B	False
chr5	138610967	138935034	+	ENSG00000253404	ENSG00000044115	ENSG00000253404	False
chr5	138744434	138753936	-	ENSG00000044115	ENSG00000044115_daRNA	CTNNA1	True
chr5	139388469	139398403	+	ENSG00000170476	ENSG00000170476_daRNA	MZB1	True
chr5	139560218	139561716	-	ENSG00000131508	ENSG00000131508_daRNA	UBE2D2	True
chr5	139628694	139648194	-	ENSG00000171604	ENSG00000171604_daRNA	CXXC5	True
chr5	140103842	140108062	-	ENSG00000185129	ENSG00000185129_daRNA	PURA	True
chr5	140564458	140564828	+	ENSG00000113108	ENSG00000113108_daRNA	APBB3	True
chr5	140860467	140869510	-	ENSG00000249158	ENSG00000249158_daRNA	PCDHA11	True
chr5	140860467	140875882	-	ENSG00000251664	ENSG00000251664_daRNA	PCDHA12	True
chr5	140882124	141012347	+	ENSG00000278901	ENSG00000239389	ENSG00000278901	False
chr5	141618414	141626481	+	ENSG00000131504	ENSG00000228737	DIAPH1	False
chr5	141636849	141637287	-	ENSG00000164620	ENSG00000164620_daRNA	RELL2	True
chr5	143404618	143406407	+	ENSG00000113580	ENSG00000113580_daRNA	NR3C1	True
chr5	150000654	150001149	-	ENSG00000113716	ENSG00000113716_daRNA	HMGXB3	True
chr5	157731134	157731682	-	ENSG00000113272	ENSG00000113272_daRNA	THG1L	True
chr5	163422885	163437910	-	ENSG00000113328	ENSG00000113328_daRNA	CCNG1	True
chr5	172006714	172007343	+	ENSG00000072803	ENSG00000072803_daRNA	FBXW11	True
chr5	176388598	176389039	-	ENSG00000146066	ENSG00000146066_daRNA	HIGD2A	True
chr5	177005942	177007339	+	ENSG00000087206	ENSG00000087206_daRNA	UIMC1	True
chr5	177403204	177442901	+	ENSG00000131187	ENSG00000198055	F12	False
chr5	177445994	177447980	-	ENSG00000131188	ENSG00000131188_daRNA	PRR7	True
chr5	177554227	177555361	+	ENSG00000146067	ENSG00000146067_daRNA	FAM193B	True
chr5	178152009	178152641	+	ENSG00000145912	ENSG00000145912_daRNA	NHP2	True
chr5	178203857	178205391	-	ENSG00000197451	ENSG00000197451_daRNA	HNRNPAB	True
chr5	179676128	179698613	-	ENSG00000127022	ENSG00000127022_daRNA	CANX	True
chr5	179791147	179795990	-	ENSG00000213316	ENSG00000213316_daRNA	LTC4S	True
chr5	179806010	179806398	+	ENSG00000161013	ENSG00000161013_daRNA	MGAT4B	True
chr5	179806398	179838078	+	ENSG00000161013	ENSG00000161011	MGAT4B	False
chr5	179806952	179807385	-	ENSG00000161011	ENSG00000161011_daRNA	SQSTM1	True
chr5	180810226	180811382	+	ENSG00000131446	ENSG00000131446_daRNA	MGAT1	True
chr5	180829962	180831336	-	ENSG00000245060	ENSG00000245060_daRNA	LINC00847	True
chr5	180831446	180835701	+	ENSG00000278970	ENSG00000278970_daRNA	HEIH	True
chr5	181222869	181223651	-	ENSG00000146063	ENSG00000146063_daRNA	TRIM41	True
chr5	181261118	181261797	-	ENSG00000248275	ENSG00000248275_daRNA	TRIM52-AS1	True
chr6	3068045	3068894	-	ENSG00000137275	ENSG00000272277	RIPK1	False
chr6	4774890	4776403	+	ENSG00000236336	ENSG00000236336_daRNA	CDYL-AS1	True
chr6	5003774	5045666	+	ENSG00000124787	ENSG00000272142	RPP40	False
chr6	7389469	7389793	+	ENSG00000164304	ENSG00000164304_daRNA	CAGE1	True
chr6	7540457	7542415	-	ENSG00000096696	ENSG00000096696_daRNA	DSP	True
chr6	7541337	7541617	+	ENSG00000261189	ENSG00000261189_daRNA	ENSG00000261189	True
chr6	10412309	10413858	+	ENSG00000137203	ENSG00000137203_daRNA	TFAP2A	True
chr6	11043482	11079154	+	ENSG00000197977	ENSG00000230314	ELOVL2	False
chr6	11092874	11094107	-	ENSG00000224531	ENSG00000224531_daRNA	SMIM13	True
chr6	13486294	13486852	+	ENSG00000145990	ENSG00000237786	GFOD1	False
chr6	15247693	15248366	-	ENSG00000008083	ENSG00000008083_daRNA	JARID2	True
chr6	16760308	16763484	+	ENSG00000124788	ENSG00000124788_daRNA	ATXN1	True
chr6	16762427	16765818	-	ENSG00000272341	ENSG00000272341_daRNA	ENSG00000272341	True
chr6	17706517	17707342	+	ENSG00000124789	ENSG00000124789_daRNA	NUP153	True
chr6	19837538	19838986	-	ENSG00000172201	ENSG00000172201_daRNA	ID4	True
chr6	21528739	21595593	-	ENSG00000124766	ENSG00000283480	SOX4	False
chr6	26123927	26126285	-	ENSG00000180573	ENSG00000180573_daRNA	H2AC6	True
chr6	26198881	26199520	+	ENSG00000282988	ENSG00000282988_daRNA	ENSG00000282988	True
chr6	26216937	26217229	-	ENSG00000277075	ENSG00000277075_daRNA	H2AC8	True
chr6	26272701	26273017	-	ENSG00000278588	ENSG00000278588_daRNA	H2BC10	True
chr6	26956932	27059749	+	ENSG00000287966	ENSG00000224843	ENSG00000287966	False
chr6	28078792	28080800	-	ENSG00000197279	ENSG00000197279_daRNA	ZNF165	True
chr6	28336029	28337027	+	ENSG00000235109	ENSG00000235109_daRNA	ZSCAN31	True
chr6	30326479	30343729	+	ENSG00000231074	ENSG00000204599	HCG18	False
chr6	30326479	30343729	+	ENSG00000231074	ENSG00000204599	HCG18	False
chr6	30600413	30618612	-	ENSG00000204568	ENSG00000204569	MRPS18B	False
chr6	30615107	30615228	+	ENSG00000204569	ENSG00000204569_daRNA	PPP1R10	True
chr6	30641660	30647757	-	ENSG00000204564	ENSG00000204564_daRNA	C6orf136	True
chr6	30699807	30717447	-	ENSG00000196230	ENSG00000137337	TUBB	False
chr6	31195203	31197912	-	ENSG00000206344	ENSG00000206344_daRNA	HCG27	True
chr6	31308183	31309716	+	ENSG00000229836	ENSG00000229836_daRNA	ENSG00000229836	True
chr6	31530219	31542448	-	ENSG00000234006	ENSG00000198563	DDX39B-AS1	False
chr6	31541666	31542226	+	ENSG00000198563	ENSG00000198563_daRNA	DDX39B	True
chr6	31652416	31658210	+	ENSG00000204463	ENSG00000204444	BAG6	False
chr6	31739763	31740553	-	ENSG00000204410	ENSG00000204410_daRNA	MSH5	True
chr6	31899284	31899526	-	ENSG00000166278	ENSG00000166278_daRNA	C2	True
chr6	31972080	31972340	+	ENSG00000204348	ENSG00000204348_daRNA	DXO	True
chr6	32153845	32171978	+	ENSG00000285085	ENSG00000258388	ENSG00000285085	False
chr6	32838349	32838464	+	ENSG00000250264	ENSG00000250264_daRNA	ENSG00000250264	True
chr6	32948613	32969094	-	ENSG00000204256	ENSG00000204257	BRD2	False
chr6	32969095	32970629	-	ENSG00000223837	ENSG00000223837_daRNA	ENSG00000223837	True
chr6	32969095	32970735	-	ENSG00000204256	ENSG00000204256_daRNA	BRD2	True
chr6	33200445	33204439	+	ENSG00000204231	ENSG00000112473	RXRB	False
chr6	33289096	33289627	+	ENSG00000227057	ENSG00000227057_daRNA	WDR46	True
chr6	33298148	33298437	+	ENSG00000237441	ENSG00000237441_daRNA	RGL2	True
chr6	33453084	33453687	+	ENSG00000274259	ENSG00000274259_daRNA	SYNGAP1-AS1	True
chr6	33788449	33789345	+	ENSG00000161904	ENSG00000161904_daRNA	LEMD2	True
chr6	34248535	34286768	+	ENSG00000186577	ENSG00000225339	SMIM29	False
chr6	34696448	34697468	+	ENSG00000196821	ENSG00000196821_daRNA	ILRUN	True
chr6	36146698	36197205	-	ENSG00000096070	ENSG00000246982	BRPF3	False
chr6	36386934	36391819	+	ENSG00000010030	ENSG00000010030_daRNA	ETV7	True
chr6	36677611	36680183	-	ENSG00000124762	ENSG00000124762_daRNA	CDKN1A	True
chr6	36874627	36876723	+	ENSG00000137168	ENSG00000137168_daRNA	PPIL1	True
chr6	41784526	41785414	-	ENSG00000278224	ENSG00000278224_daRNA	PRICKLE4	True
chr6	42928786	42929238	-	ENSG00000137161	ENSG00000137161_daRNA	CNPY3	True
chr6	43059438	43059824	-	ENSG00000137171	ENSG00000137171_daRNA	KLC4	True
chr6	43074334	43077235	-	ENSG00000112655	ENSG00000112655_daRNA	PTK7	True
chr6	43170858	43172270	-	ENSG00000112658	ENSG00000112658_daRNA	SRF	True
chr6	43427648	43427783	-	ENSG00000124574	ENSG00000124574_daRNA	ABCC10	True
chr6	44126914	44155519	+	ENSG00000180992	ENSG00000137216	MRPL14	False
chr6	44127452	44128261	-	ENSG00000137216	ENSG00000137216_daRNA	TMEM63B	True
chr6	45421204	45422185	-	ENSG00000124813	ENSG00000124813_daRNA	RUNX2	True
chr6	45421883	45422099	+	ENSG00000271857	ENSG00000271857_daRNA	ENSG00000271857	True
chr6	47477244	47478070	-	ENSG00000198087	ENSG00000198087_daRNA	CD2AP	True
chr6	53794497	53924125	+	ENSG00000227885	ENSG00000137269	ENSG00000227885	False
chr6	54840263	54847082	-	ENSG00000168143	ENSG00000168143_daRNA	FAM83B	True
chr6	56955107	57027346	+	ENSG00000151914	ENSG00000151917	DST	False
chr6	63566236	63573598	-	ENSG00000285976	ENSG00000285976_daRNA	ENSG00000285976	True
chr6	73309522	73310638	+	ENSG00000135314	ENSG00000135314_daRNA	KHDC1	True
chr6	73368555	73395133	-	ENSG00000080007	ENSG00000203907	DDX43	False
chr6	73523618	73570596	+	ENSG00000156508	ENSG00000229862	EEF1A1	False
chr6	75748173	75749169	-	ENSG00000196586	ENSG00000196586_daRNA	MYO6	True
chr6	79077880	79080522	+	ENSG00000146247	ENSG00000146247_daRNA	PHIP	True
chr6	79201249	79233938	-	ENSG00000270362	ENSG00000270362_daRNA	HMGN3-AS1	True
chr6	82362223	82364162	-	ENSG00000146242	ENSG00000146242_daRNA	TPBG	True
chr6	85643701	85644359	+	ENSG00000135316	ENSG00000135316_daRNA	SYNCRIP	True
chr6	89080164	89081611	-	ENSG00000146278	ENSG00000146278_daRNA	PNRC1	True
chr6	89638531	89648812	+	ENSG00000083099	ENSG00000083099_daRNA	LYRM2	True
chr6	99424922	99432323	+	ENSG00000132424	ENSG00000228506	PNISR	False
chr6	100881372	100881586	-	ENSG00000260000	ENSG00000260000_daRNA	ENSG00000260000	True
chr6	106974891	107013298	+	ENSG00000272398	ENSG00000272398_daRNA	CD24	True
chr6	109009108	109010124	+	ENSG00000080546	ENSG00000080546_daRNA	SESN1	True
chr6	109382302	109383671	+	ENSG00000135535	ENSG00000135535_daRNA	CD164	True
chr6	111483511	111598302	+	ENSG00000009413	ENSG00000231889	REV3L	False
chr6	113857157	113858767	-	ENSG00000277443	ENSG00000277443_daRNA	MARCKS	True
chr6	118934567	118938355	+	ENSG00000111877	ENSG00000111877_daRNA	MCM9	True
chr6	119349761	119350603	-	ENSG00000287100	ENSG00000287100_daRNA	ENSG00000287100	True
chr6	122788973	122789500	-	ENSG00000172594	ENSG00000172594_daRNA	SMPDL3A	True
chr6	125153589	125154776	-	ENSG00000111907	ENSG00000111907_daRNA	TPD52L1	True
chr6	125747664	125761269	+	ENSG00000237742	ENSG00000135547	ENSG00000237742	False
chr6	128519769	128521162	+	ENSG00000152894	ENSG00000152894_daRNA	PTPRK	True
chr6	136342735	136550893	-	ENSG00000272189	ENSG00000272189_daRNA	ENSG00000272189	True
chr6	138160360	138162570	-	ENSG00000112379	ENSG00000112379_daRNA	ARFGEF3	True
chr6	138692485	138697287	+	ENSG00000135540	ENSG00000135540_daRNA	NHSL1	True
chr6	142300238	142302342	-	ENSG00000112414	ENSG00000112414_daRNA	ADGRG6	True
chr6	143511286	143512553	+	ENSG00000001036	ENSG00000001036_daRNA	FUCA2	True
chr6	147204187	147385729	+	ENSG00000233452	ENSG00000233452_daRNA	STXBP5-AS1	True
chr6	148341498	148342879	-	ENSG00000111961	ENSG00000111961_daRNA	SASH1	True
chr6	149717836	149718897	+	ENSG00000131023	ENSG00000131023_daRNA	LATS1	True
chr6	149863494	149919507	+	ENSG00000120256	ENSG00000268592	LRP11	False
chr6	149864128	149865420	+	ENSG00000120256	ENSG00000120256_daRNA	LRP11	True
chr6	151391150	151394145	+	ENSG00000181472	ENSG00000181472_daRNA	ZBTB2	True
chr6	151450985	151452423	+	ENSG00000155906	ENSG00000155906_daRNA	RMND1	True
chr6	151452398	151452825	-	ENSG00000146476	ENSG00000146476_daRNA	ARMT1	True
chr6	151490424	151494297	-	ENSG00000120262	ENSG00000120262_daRNA	CCDC170	True
chr6	151807392	151808066	-	ENSG00000091831	ENSG00000091831_daRNA	ESR1	True
chr6	152983331	152991322	+	ENSG00000112029	ENSG00000227627	FBXO5	False
chr6	156776765	156778876	-	ENSG00000049618	ENSG00000049618_daRNA	ARID1B	True
chr6	157323285	157324475	+	ENSG00000215712	ENSG00000215712_daRNA	TMEM242	True
chr6	158988178	159088114	+	ENSG00000130363	ENSG00000271913	RSPH3	False
chr6	159669069	159762529	-	ENSG00000146457	ENSG00000112096	WTAP	False
chr6	159761087	159762318	-	ENSG00000120437	ENSG00000120437_daRNA	ACAT2	True
chr6	167826538	167826922	+	ENSG00000198221	ENSG00000198221_daRNA	AFDN-DT	True
chr6	169702067	169702733	-	ENSG00000185127	ENSG00000185127_daRNA	C6orf120	True
chr7	519295	525231	+	ENSG00000197461	ENSG00000197461_daRNA	PDGFA	True
chr7	549197	727650	-	ENSG00000164818	ENSG00000188191	DNAAF5	False
chr7	1152071	1160759	-	ENSG00000229043	ENSG00000178381	ZFAND2A-DT	False
chr7	1532456	1532879	-	ENSG00000198517	ENSG00000198517_daRNA	MAFK	True
chr7	1567332	1571005	-	ENSG00000230487	ENSG00000157778	PSMG3-AS1	False
chr7	2251770	2354318	-	ENSG00000106263	ENSG00000106266	EIF3B	False
chr7	5424260	5426399	+	ENSG00000182095	ENSG00000182095_daRNA	TNRC18	True
chr7	5425414	5425868	-	ENSG00000272953	ENSG00000272953_daRNA	ENSG00000272953	True
chr7	5428185	5456638	+	ENSG00000234432	ENSG00000234432_daRNA	ENSG00000234432	True
chr7	5562153	5569181	+	ENSG00000075624	ENSG00000075624_daRNA	ACTB	True
chr7	7552462	7566996	-	ENSG00000164654	ENSG00000272894	MIOS	False
chr7	7640711	7968020	+	ENSG00000106399	ENSG00000219545	RPA3	False
chr7	7945382	7969145	-	ENSG00000106415	ENSG00000106415_daRNA	GLCCI1	True
chr7	8261870	8262819	+	ENSG00000003147	ENSG00000003147_daRNA	ICA1	True
chr7	8262264	8344516	+	ENSG00000003147	ENSG00000229970	ICA1	False
chr7	16420705	16435516	+	ENSG00000214960	ENSG00000214960_daRNA	CRPPA	True
chr7	16970320	17299368	-	ENSG00000106546	ENSG00000237773	AHR	False
chr7	23680195	23680786	-	ENSG00000188732	ENSG00000234286	FAM221A	False
chr7	27662884	27740795	-	ENSG00000106052	ENSG00000106052_daRNA	TAX1BP1	True
chr7	29645923	29684947	-	ENSG00000227855	ENSG00000227855_daRNA	DPY19L2P3	True
chr7	29989009	29990445	+	ENSG00000136193	ENSG00000136193_daRNA	SCRN1	True
chr7	32716667	32728603	-	ENSG00000237004	ENSG00000237004_daRNA	ZNRF2P1	True
chr7	32955173	32957865	-	ENSG00000122642	ENSG00000122642_daRNA	FKBP9	True
chr7	35694960	35698913	+	ENSG00000122557	ENSG00000122557_daRNA	HERPUD2	True
chr7	39700203	39734124	-	ENSG00000188185	ENSG00000188185_daRNA	LINC00265	True
chr7	39949795	39950121	+	ENSG00000259826	ENSG00000259826_daRNA	ENSG00000259826	True
chr7	43926338	43926706	-	ENSG00000078967	ENSG00000078967_daRNA	UBE2D4	True
chr7	44044176	44045179	-	ENSG00000136279	ENSG00000136279_daRNA	DBNL	True
chr7	44490036	44492879	+	ENSG00000015676	ENSG00000015676_daRNA	NUDCD3	True
chr7	44606268	44606799	-	ENSG00000105953	ENSG00000105953_daRNA	OGDH	True
chr7	44876301	44885351	-	ENSG00000272768	ENSG00000272768_daRNA	ENSG00000272768	True
chr7	45572383	45574338	-	ENSG00000164742	ENSG00000164742_daRNA	ADCY1	True
chr7	54752250	54759974	-	ENSG00000234707	ENSG00000132432	SEC61G-DT	False
chr7	55365196	55365983	-	ENSG00000132434	ENSG00000132434_daRNA	LANCL2	True
chr7	66592013	66592601	+	ENSG00000229180	ENSG00000229180_daRNA	ENSG00000229180	True
chr7	73683178	73683597	+	ENSG00000176410	ENSG00000176410_daRNA	DNAJC30	True
chr7	73738353	73832683	+	ENSG00000106077	ENSG00000106077_daRNA	ABHD11	True
chr7	73769617	73832683	+	ENSG00000165215	ENSG00000165215_daRNA	CLDN3	True
chr7	73830093	73831744	-	ENSG00000189143	ENSG00000189143_daRNA	CLDN4	True
chr7	75359267	75370647	+	ENSG00000278416	ENSG00000278416_daRNA	PMS2P2	True
chr7	87151424	87152550	-	ENSG00000135164	ENSG00000135164_daRNA	DMTF1	True
chr7	92134604	92180725	+	ENSG00000001630	ENSG00000188693	CYP51A1	False
chr7	92198969	92246166	-	ENSG00000001629	ENSG00000001631	ANKIB1	False
chr7	92833561	92837265	+	ENSG00000105810	ENSG00000105810_daRNA	CDK6	True
chr7	93585252	93591776	-	ENSG00000127928	ENSG00000127928_daRNA	GNGT1	True
chr7	98251958	98252379	+	ENSG00000205356	ENSG00000205356_daRNA	TECPR1	True
chr7	98875093	98879052	-	ENSG00000196367	ENSG00000196367_daRNA	TRRAP	True
chr7	99143585	99144716	+	ENSG00000198742	ENSG00000198742_daRNA	SMURF1	True
chr7	99371387	99375470	-	ENSG00000130429	ENSG00000130429_daRNA	ARPC1B	True
chr7	99408073	99408641	+	ENSG00000106244	ENSG00000106244_daRNA	PDAP1	True
chr7	99408641	99419616	+	ENSG00000106244	ENSG00000106245	PDAP1	False
chr7	99472585	99473423	-	ENSG00000198556	ENSG00000198556_daRNA	ZNF789	True
chr7	99473877	99504857	-	ENSG00000196652	ENSG00000160908	ZKSCAN5	False
chr7	100101409	100101919	-	ENSG00000221838	ENSG00000221838_daRNA	AP4M1	True
chr7	100126785	100128495	+	ENSG00000242798	ENSG00000214309	ENSG00000242798	False
chr7	100319222	100336307	-	ENSG00000242294	ENSG00000078319	STAG3L5P	False
chr7	100428993	100429138	-	ENSG00000146834	ENSG00000146834_daRNA	MEPCE	True
chr7	100435765	100442786	+	ENSG00000160813	ENSG00000160813_daRNA	PPP1R35	True
chr7	100436204	100438504	+	ENSG00000160813	ENSG00000240211	PPP1R35	False
chr7	100582324	100586679	+	ENSG00000077454	ENSG00000077454_daRNA	LRCH4	True
chr7	100685635	100690114	+	ENSG00000146830	ENSG00000146830_daRNA	GIGYF1	True
chr7	100825518	100826819	+	ENSG00000196411	ENSG00000196411_daRNA	EPHB4	True
chr7	101163870	101171363	+	ENSG00000128564	ENSG00000128564_daRNA	VGF	True
chr7	101217690	101218165	+	ENSG00000106397	ENSG00000106397_daRNA	PLOD3	True
chr7	101814910	101815867	-	ENSG00000257923	ENSG00000257923_daRNA	CUX1	True
chr7	103074811	103075100	-	ENSG00000170632	ENSG00000170632_daRNA	ARMC10	True
chr7	103149363	103150519	+	ENSG00000161048	ENSG00000161048_daRNA	NAPEPLD	True
chr7	103344410	103347659	+	ENSG00000105821	ENSG00000105821_daRNA	DNAJC2	True
chr7	103344831	103348065	-	ENSG00000161057	ENSG00000161057_daRNA	PSMC2	True
chr7	105000833	105014084	-	ENSG00000005483	ENSG00000005483_daRNA	KMT2E	True
chr7	105012829	105014189	+	ENSG00000228393	ENSG00000228393_daRNA	LINC01004	True
chr7	106112495	106112885	+	ENSG00000008282	ENSG00000008282_daRNA	SYPL1	True
chr7	107563934	107564338	-	ENSG00000288558	ENSG00000288558_daRNA	DUS4L-BCAP29	True
chr7	107739999	107744581	-	ENSG00000105879	ENSG00000241764	CBLL1	False
chr7	107743801	107744142	+	ENSG00000241764	ENSG00000241764_daRNA	ENSG00000241764	True
chr7	108455716	108458205	+	ENSG00000091129	ENSG00000091129_daRNA	NRCAM	True
chr7	116499410	116499738	+	ENSG00000237813	ENSG00000237813_daRNA	ENSG00000237813	True
chr7	123748400	123749845	+	ENSG00000106299	ENSG00000106299_daRNA	WASL	True
chr7	123749003	123749352	-	ENSG00000272686	ENSG00000272686_daRNA	WASL-DT	True
chr7	124929873	125482966	+	ENSG00000128513	ENSG00000224897	POT1	False
chr7	129054596	129055223	+	ENSG00000064419	ENSG00000064419_daRNA	TNPO3	True
chr7	139035673	139036948	+	ENSG00000146858	ENSG00000146858_daRNA	ZC3HAV1L	True
chr7	139339901	139341685	-	ENSG00000164898	ENSG00000164898_daRNA	FMC1	True
chr7	139359031	139359692	-	ENSG00000146963	ENSG00000146963_daRNA	LUC7L2	True
chr7	140175673	140179638	+	ENSG00000006459	ENSG00000006459_daRNA	KDM7A	True
chr7	140695336	140697077	-	ENSG00000090266	ENSG00000240889	NDUFB2	False
chr7	141072500	141074644	-	ENSG00000261115	ENSG00000261115_daRNA	TMEM178B	True
chr7	143380357	143381345	+	ENSG00000232533	ENSG00000232533_daRNA	ENSG00000232533	True
chr7	149497323	149501411	+	ENSG00000181220	ENSG00000181220_daRNA	ZNF746	True
chr7	149624007	149639952	+	ENSG00000133624	ENSG00000133624_daRNA	ZNF767P	True
chr7	149872968	149891204	+	ENSG00000204934	ENSG00000171130	ATP6V0E2-AS1	False
chr7	150243916	150323725	-	ENSG00000188707	ENSG00000106526	ZBED6CL	False
chr7	150367333	150369019	-	ENSG00000214022	ENSG00000214022_daRNA	REPIN1	True
chr7	151057898	151062893	-	ENSG00000164889	ENSG00000164889_daRNA	SLC4A2	True
chr7	155295920	155298978	-	ENSG00000186480	ENSG00000186480_daRNA	INSIG1	True
chr7	155611231	155645205	-	ENSG00000184863	ENSG00000216895	RBM33	False
chr7	156639909	156640674	+	ENSG00000182648	ENSG00000182648_daRNA	LINC01006	True
chr7	157336327	157337748	-	ENSG00000105993	ENSG00000105993_daRNA	DNAJB6	True
chr8	1761054	1764508	-	ENSG00000182372	ENSG00000253982	CLN8	False
chr8	9555144	9556520	-	ENSG00000173273	ENSG00000272267	TNKS	False
chr8	17495150	17498191	-	ENSG00000003989	ENSG00000003989_daRNA	SLC7A2	True
chr8	18084434	18085809	+	ENSG00000104763	ENSG00000104763_daRNA	ASAH1	True
chr8	22668767	22669603	+	ENSG00000147439	ENSG00000147439_daRNA	BIN3	True
chr8	23224533	23228649	+	ENSG00000104689	ENSG00000104689_daRNA	TNFRSF10A	True
chr8	23225102	23225407	-	ENSG00000246582	ENSG00000246582_daRNA	ENSG00000246582	True
chr8	29348826	29357637	+	ENSG00000120875	ENSG00000120875_daRNA	DUSP4	True
chr8	30082542	30083461	+	ENSG00000133872	ENSG00000133872_daRNA	SARAF	True
chr8	30156019	30156631	-	ENSG00000104671	ENSG00000104671_daRNA	DCTN6	True
chr8	30382119	30385401	-	ENSG00000157110	ENSG00000254109	RBPMS	False
chr8	37694745	37696636	-	ENSG00000183779	ENSG00000183779_daRNA	ZNF703	True
chr8	38176533	38213301	+	ENSG00000175324	ENSG00000156735	LSM1	False
chr8	41509593	41578421	-	ENSG00000158669	ENSG00000253133	GPAT4	False
chr8	42541155	42555195	+	ENSG00000168575	ENSG00000176209	SLC20A2	False
chr8	42541155	42555195	+	ENSG00000168575	ENSG00000176209	SLC20A2	False
chr8	42842989	42844876	+	ENSG00000131931	ENSG00000286837	THAP1	False
chr8	42849637	42897290	-	ENSG00000168172	ENSG00000120925	HOOK3	False
chr8	48620519	48623888	+	ENSG00000253702	ENSG00000253702_daRNA	LINC02847	True
chr8	52713541	52715806	+	ENSG00000023287	ENSG00000023287_daRNA	RB1CC1	True
chr8	53865034	53879952	-	ENSG00000147509	ENSG00000147509_daRNA	RGS20	True
chr8	55773060	55773446	+	ENSG00000167904	ENSG00000167904_daRNA	TMEM68	True
chr8	58659263	58660098	+	ENSG00000035681	ENSG00000035681_daRNA	NSMAF	True
chr8	63167888	63168952	-	ENSG00000185728	ENSG00000185728_daRNA	YTHDF3	True
chr8	66111173	66113904	-	ENSG00000253190	ENSG00000253190_daRNA	ENSG00000253190	True
chr8	66712246	66712845	-	ENSG00000104205	ENSG00000104205_daRNA	SGK3	True
chr8	67343432	67345084	+	ENSG00000066777	ENSG00000066777_daRNA	ARFGEF1	True
chr8	73290242	73295789	-	ENSG00000121039	ENSG00000147604	RDH10	False
chr8	73294287	73294602	+	ENSG00000147604	ENSG00000147604_daRNA	RPL7	True
chr8	74320613	74518007	+	ENSG00000104369	ENSG00000104381	JPH1	False
chr8	80484561	80486699	-	ENSG00000205189	ENSG00000251867	ZBTB10	False
chr8	81732485	81759510	+	ENSG00000104231	ENSG00000104231_daRNA	ZFAND1	True
chr8	85176939	85177815	-	ENSG00000133740	ENSG00000133740_daRNA	E2F5	True
chr8	85440596	85464915	-	ENSG00000104267	ENSG00000253549	CA2	False
chr8	85463695	85463968	+	ENSG00000253549	ENSG00000253549_daRNA	CA3-AS1	True
chr8	86333275	86343198	-	ENSG00000123124	ENSG00000123124_daRNA	WWP1	True
chr8	89900658	89902404	-	ENSG00000164823	ENSG00000164823_daRNA	OSGIN2	True
chr8	89984411	89984920	+	ENSG00000104320	ENSG00000104320_daRNA	NBN	True
chr8	90645095	90647335	+	ENSG00000180694	ENSG00000180694_daRNA	TMEM64	True
chr8	90791633	90793307	-	ENSG00000123119	ENSG00000123119_daRNA	NECAB1	True
chr8	92965773	92966351	+	ENSG00000205133	ENSG00000205133_daRNA	TRIQK	True
chr8	94639328	94639783	+	ENSG00000261437	ENSG00000261437_daRNA	LINC02894	True
chr8	94640017	94642000	-	ENSG00000104413	ENSG00000104413_daRNA	ESRP1	True
chr8	94879770	94896678	-	ENSG00000156170	ENSG00000175305	NDUFAF6	False
chr8	95086099	95103453	+	ENSG00000254248	ENSG00000254248_daRNA	ENSG00000254248	True
chr8	95204456	95811254	+	ENSG00000156172	ENSG00000253773	C8orf37	False
chr8	99012838	99013266	+	ENSG00000253948	ENSG00000253948_daRNA	VPS13B-DT	True
chr8	99893373	99895121	+	ENSG00000164919	ENSG00000287952	COX6C	False
chr8	100309523	100310948	+	ENSG00000034677	ENSG00000034677_daRNA	RNF19A	True
chr8	100722497	100723558	+	ENSG00000070756	ENSG00000070756_daRNA	PABPC1	True
chr8	100950704	100953244	+	ENSG00000164924	ENSG00000164924_daRNA	YWHAZ	True
chr8	101204843	101211228	+	ENSG00000120963	ENSG00000120963_daRNA	ZNF706	True
chr8	101461177	101492499	-	ENSG00000083307	ENSG00000254024	GRHL2	False
chr8	101491369	101492932	-	ENSG00000083307	ENSG00000083307_daRNA	GRHL2	True
chr8	102236899	102253338	+	ENSG00000048392	ENSG00000048392_daRNA	RRM2B	True
chr8	102654344	102687153	+	ENSG00000155090	ENSG00000155090_daRNA	KLF10	True
chr8	102863158	102883942	+	ENSG00000155096	ENSG00000155096_daRNA	AZIN1	True
chr8	102864163	102864773	-	ENSG00000253320	ENSG00000253320_daRNA	MAILR	True
chr8	103243747	103299255	-	ENSG00000164930	ENSG00000164930_daRNA	FZD6	True
chr8	103414714	103443453	+	ENSG00000164933	ENSG00000164934	SLC25A32	False
chr8	106655320	106658415	-	ENSG00000164830	ENSG00000164830_daRNA	OXR1	True
chr8	109538068	109540114	-	ENSG00000147654	ENSG00000147654_daRNA	EBAG9	True
chr8	115669160	115669454	+	ENSG00000104447	ENSG00000104447_daRNA	TRPS1	True
chr8	116874191	116876869	+	ENSG00000164754	ENSG00000164754_daRNA	RAD21	True
chr8	118620498	118906155	+	ENSG00000177570	ENSG00000281641	SAMD12	False
chr8	118621139	118638123	+	ENSG00000177570	ENSG00000177570_daRNA	SAMD12	True
chr8	118951692	118953272	+	ENSG00000164761	ENSG00000164761_daRNA	TNFRSF11B	True
chr8	119855479	119869000	+	ENSG00000136982	ENSG00000136982_daRNA	DSCC1	True
chr8	122779979	122780814	-	ENSG00000272043	ENSG00000272043_daRNA	ENSG00000272043	True
chr8	122779979	122782074	-	ENSG00000178764	ENSG00000178764_daRNA	ZHX2	True
chr8	124472810	124474963	-	ENSG00000170881	ENSG00000170881_daRNA	RNF139	True
chr8	124474307	124474490	+	ENSG00000245149	ENSG00000245149_daRNA	RNF139-AS1	True
chr8	126556323	127419050	+	ENSG00000168672	ENSG00000253438	LRATD2	False
chr8	127730158	127736119	-	ENSG00000136997	ENSG00000136997_daRNA	MYC	True
chr8	127793055	127795705	-	ENSG00000249859	ENSG00000249859_daRNA	PVT1	True
chr8	133570706	133573853	+	ENSG00000008513	ENSG00000008513_daRNA	ST3GAL1	True
chr8	140507914	140511718	-	ENSG00000104472	ENSG00000104472_daRNA	CHRAC1	True
chr8	142657460	142681968	-	ENSG00000167653	ENSG00000234616	PSCA	False
chr8	142725145	142728368	-	ENSG00000130193	ENSG00000130193_daRNA	THEM6	True
chr8	142726608	142727223	+	ENSG00000253741	ENSG00000253741_daRNA	LNCOC1	True
chr8	142785422	142815229	+	ENSG00000167656	ENSG00000167656_daRNA	LY6D	True
chr8	143281097	143290397	+	ENSG00000253716	ENSG00000253716_daRNA	MINCR	True
chr8	143290400	143291322	-	ENSG00000185730	ENSG00000185730_daRNA	ZNF696	True
chr8	143366632	143369057	-	ENSG00000158106	ENSG00000158106_daRNA	RHPN1	True
chr8	143597240	143597831	+	ENSG00000104529	ENSG00000104529_daRNA	EEF1D	True
chr8	143597415	143598261	-	ENSG00000179886	ENSG00000179886_daRNA	TIGD5	True
chr8	143620587	143636559	-	ENSG00000183309	ENSG00000183309_daRNA	ZNF623	True
chr8	143683958	143684970	-	ENSG00000181135	ENSG00000181135_daRNA	ZNF707	True
chr8	143716004	143717179	-	ENSG00000181085	ENSG00000181085_daRNA	MAPK15	True
chr8	143736159	143740700	-	ENSG00000203499	ENSG00000203499_daRNA	IQANK1	True
chr8	143738151	143739395	+	ENSG00000180921	ENSG00000180921_daRNA	FAM83H	True
chr8	143771487	143820750	+	ENSG00000254973	ENSG00000254973_daRNA	ENSG00000254973	True
chr8	143815195	143820750	+	ENSG00000180900	ENSG00000180900_daRNA	SCRIB	True
chr8	143829080	143831810	+	ENSG00000179950	ENSG00000179950_daRNA	PUF60	True
[truncated: 159 more rows]
